# Supplementary material for: Pd(ii)-catalyzed coupling of C–H bonds of carboxamides with iodoazobenzenes toward modified azobenzenes
Source: Royal Society of Chemistry journal article supplement (doi:10.1039/d2ob02322a), 2023-01-01
Supplement: d2ob02322a1.pdf [file d2ob02322a1.pdf]

## Electronic Supplementary Information (ESI)

# Pd(II)-catalyzed coupling of C-H bonds of carboxamides with iodoazobenzenes toward modified azobenzenes

Sonam Suwasia, Sugumar Venkataramani\* and Srinivasarao Arulananda Babu\*

*Department of Chemical Sciences, Indian Institute of Science Education and Research (IISER) Mohali, Knowledge City, Sector 81, SAS Nagar, Mohali, Manauli P.O., Punjab, India, 140306. E-mail: sugumarv@iisermohali.ac.in, sababu@iisermohali.ac.in.*

### Contents

|                                                               |                |
|---------------------------------------------------------------|----------------|
| X-ray structure and brief crystal data of compound <b>22b</b> | = page2-3      |
| Copies of <sup>1</sup> H and <sup>13</sup> C NMR of compounds | = page 4-364   |
| UV-Vis absorption chart of compounds                          | = page 365-374 |
| Figures related to photoswitching and kinetics studies        | = Page 375-384 |

X-ray structure of compound **22b**

CCDC 2233013

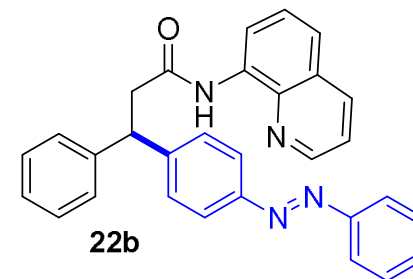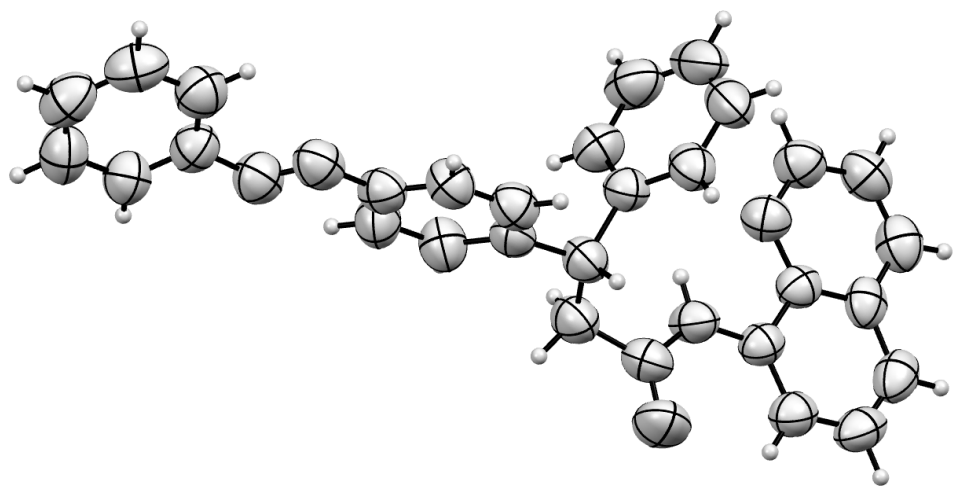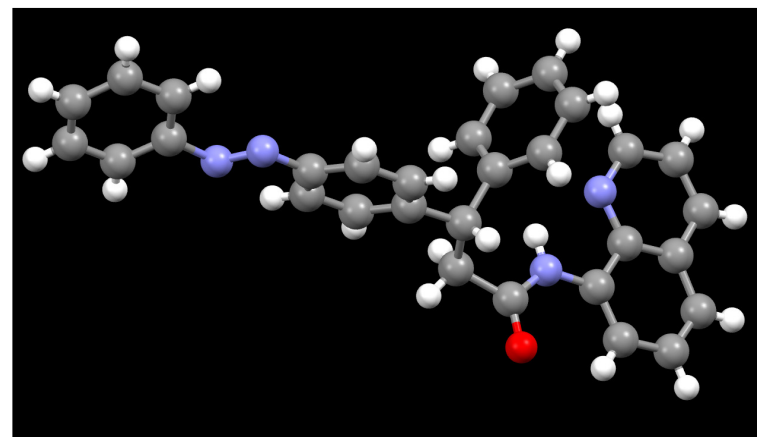

Ellipsoid probability 50%

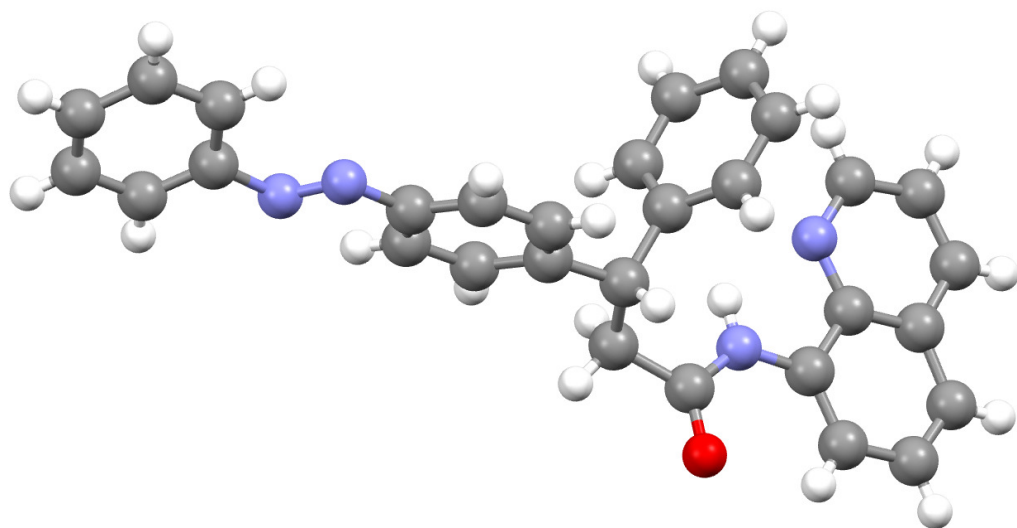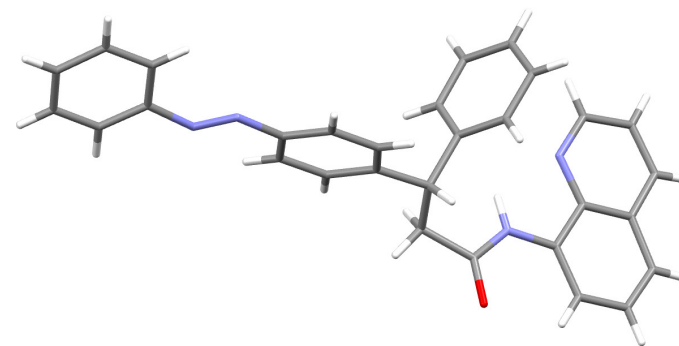

## checkCIF/PLATON report

Structure factors have been supplied for datablock(s) ss\_305

### Brief crystal data of compound **22b**

CCDC 2233013

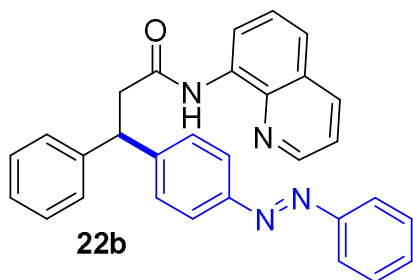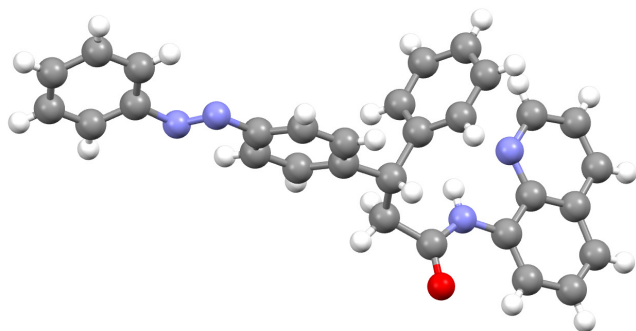

THIS REPORT IS FOR GUIDANCE ONLY. IF USED AS PART OF A REVIEW PROCEDURE FOR PUBLICATION, IT SHOULD NOT REPLACE THE EXPERTISE OF AN EXPERIENCED CRYSTALLOGRAPHIC REFEREE.

No syntax errors found. CIF dictionary Interpreting this report

### Datablock: ss\_305

Bond precision: C-C = 0.0067 Å Wavelength=0.71073  
Cell: a=15.231(2) b=8.7746(10) c=18.051(3)  
alpha=90 beta=101.917(14) gamma=90  
Temperature: 298 K

|                        | Calculated   | Reported     |
|------------------------|--------------|--------------|
| Volume                 | 2360.5(6)    | 2360.5(6)    |
| Space group            | P 21/c       | P 1 21/c 1   |
| Hall group             | -P 2ybc      | -P 2ybc      |
| Moiety formula         | C30 H24 N4 O | C30 H24 N4 O |
| Sum formula            | C30 H24 N4 O | C30 H24 N4 O |
| Mr                     | 456.53       | 456.53       |
| Dx, g cm <sup>-3</sup> | 1.285        | 1.285        |
| Z                      | 4            | 4            |
| Mu (mm <sup>-1</sup> ) | 0.080        | 0.080        |
| F000                   | 960.0        | 960.0        |
| F000'                  | 960.35       |              |
| h, k, lmax             | 23, 13, 27   | 21, 12, 26   |
| Nref                   | 8825         | 8213         |
| Tmin, Tmax             | 0.976, 0.976 | 0.291, 1.000 |
| Tmin'                  | 0.976        |              |

Correction method= # Reported T Limits: Tmin=0.291 Tmax=1.000  
AbsCorr = MULTI-SCAN

Data completeness= 0.931 Theta(max)= 32.867

R(reflections)= 0.1101( 1931)

wR2(reflections)=  
0.4230( 8213) 3

S = 0.928

Npar= 316

SpinWorks 4: S S 38 P  
PROTON CDCl3 /opt/topspin3.5pl2/nmrdata nmrsu 16

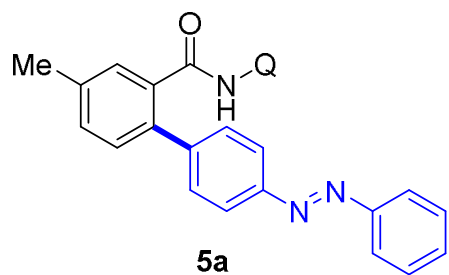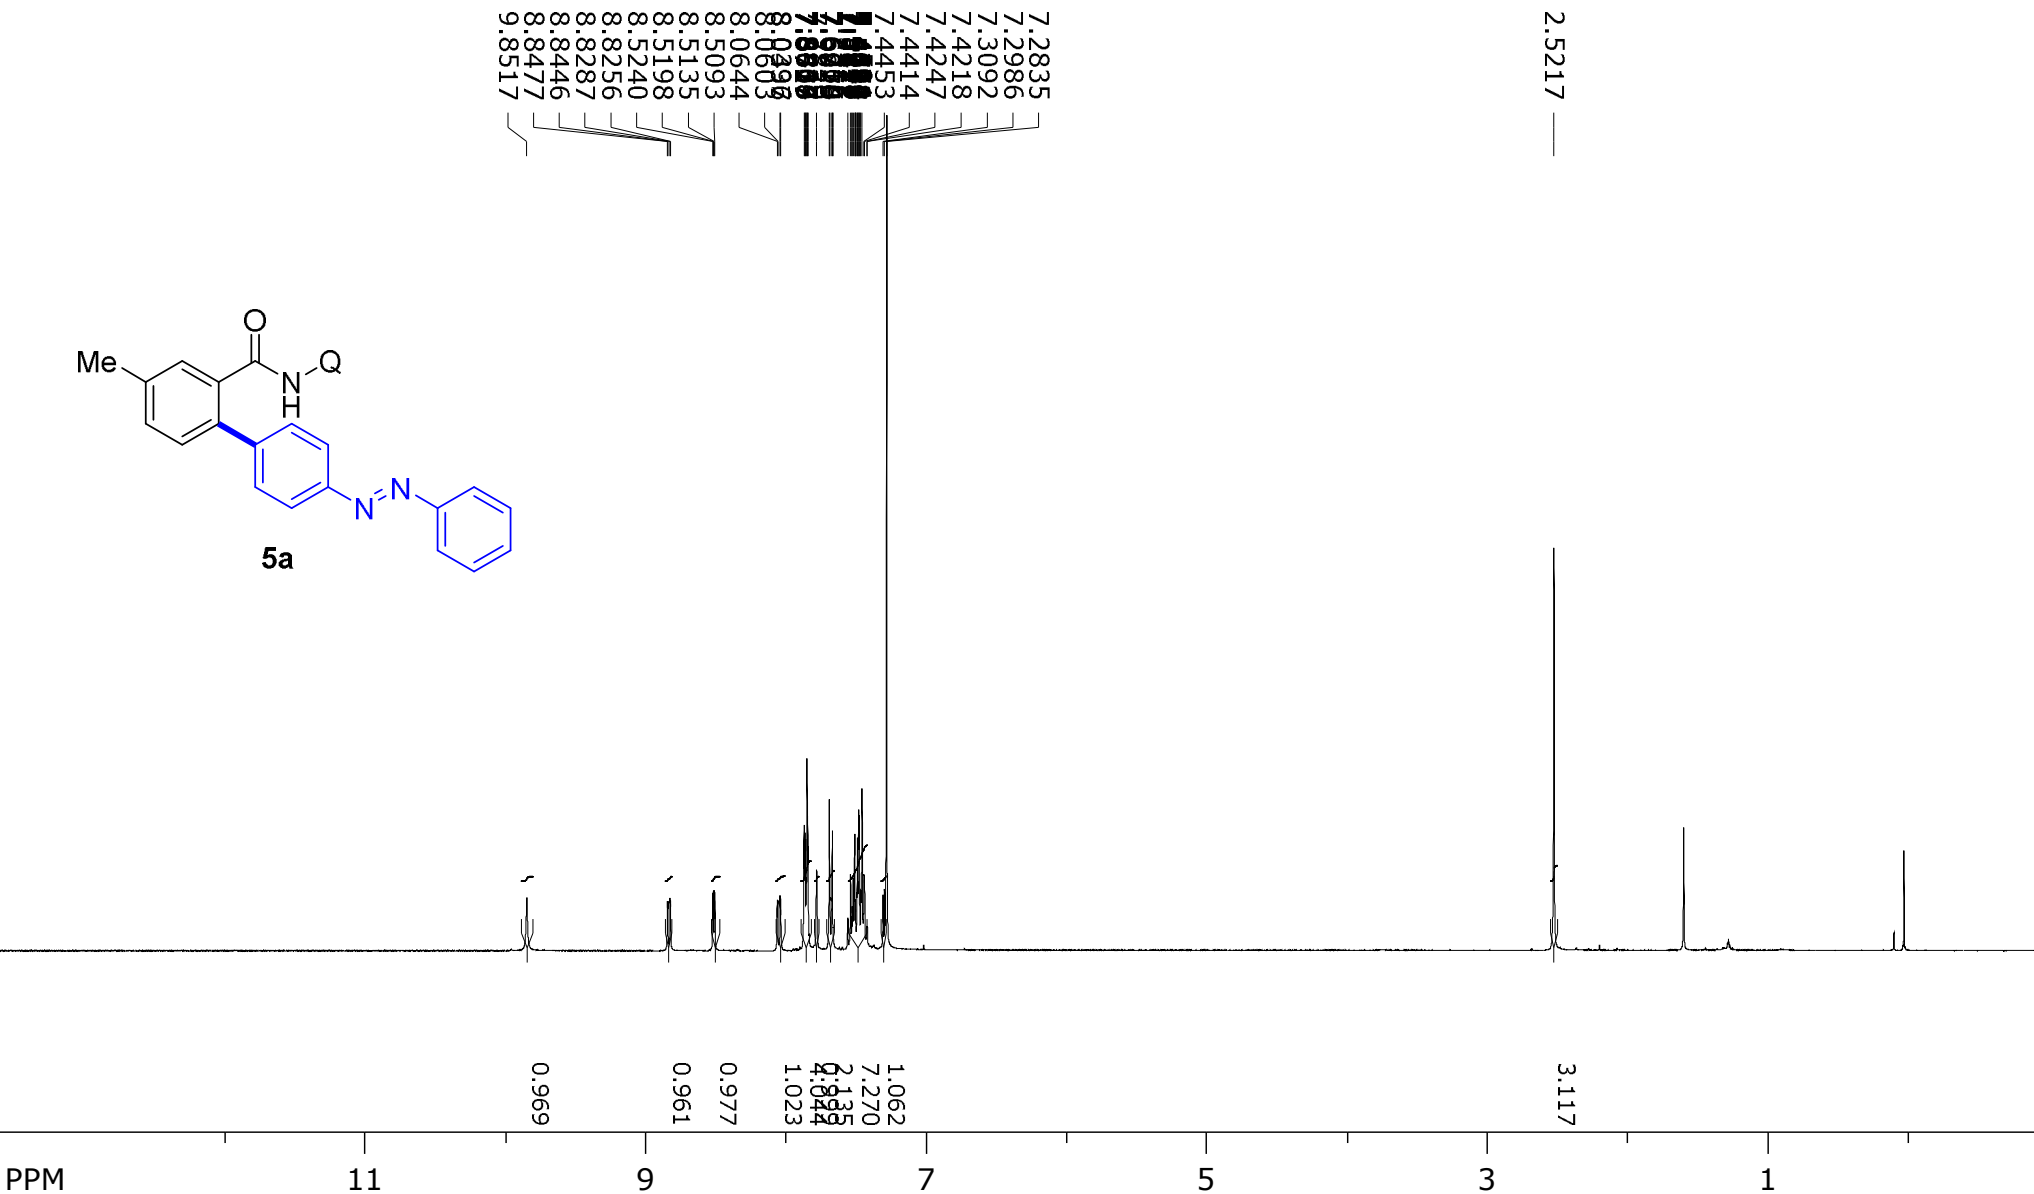



SpinWorks 4: S S 38 P  
PROTON CDCl3 /opt/topspin3.5pl2/nmrdata nmrsu 16

8.8256  
8.8287  
8.8446  
8.8477

8.5093  
8.5135  
8.5198  
8.5240

8.0396  
8.0437  
8.0603  
8.0644

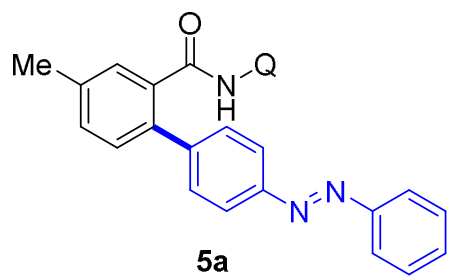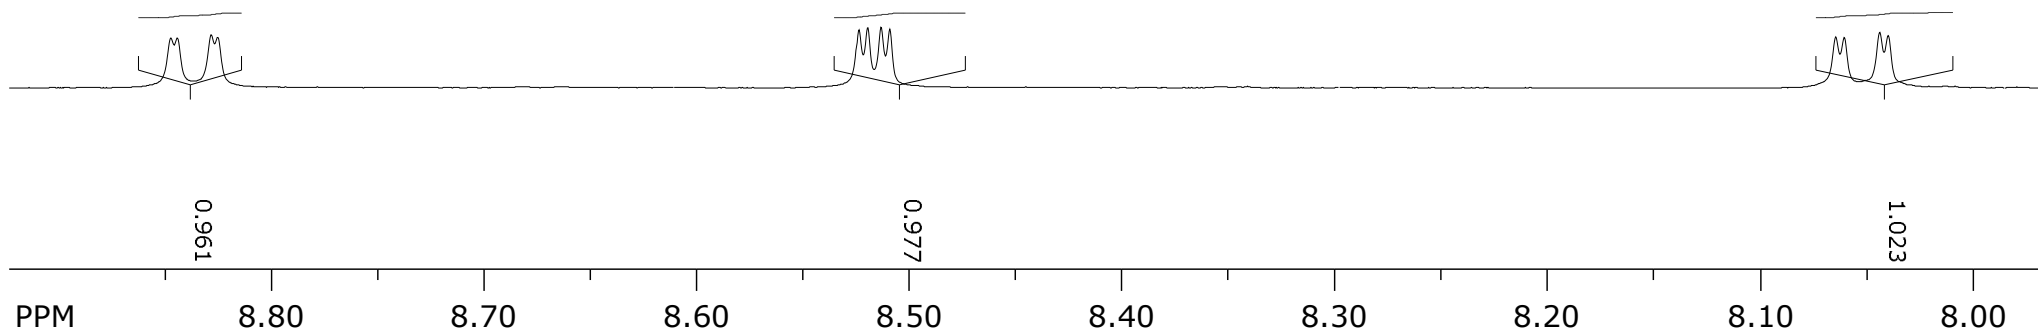

SpinWorks 4: S S 38 P  
PROTON CDCl3 /opt/topspin3.5pl2/nmrdata nmrsu 16

7.8434  
7.8467  
7.8515  
7.8567  
7.8635  
7.8678  
7.8729

7.7829

7.6660  
7.6714  
7.6758  
7.6879  
7.6926

7.4218  
7.4247  
7.4414  
7.4453  
7.4591  
7.4674  
7.4752  
7.4803  
7.4842  
7.4891  
7.4927  
7.4963  
7.5049  
7.5077  
7.5113  
7.5218  
7.5275  
7.5329  
7.5412  
7.5612

7.2835  
7.2986  
7.3092

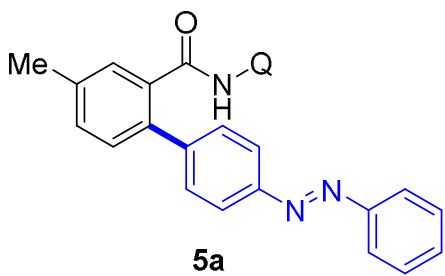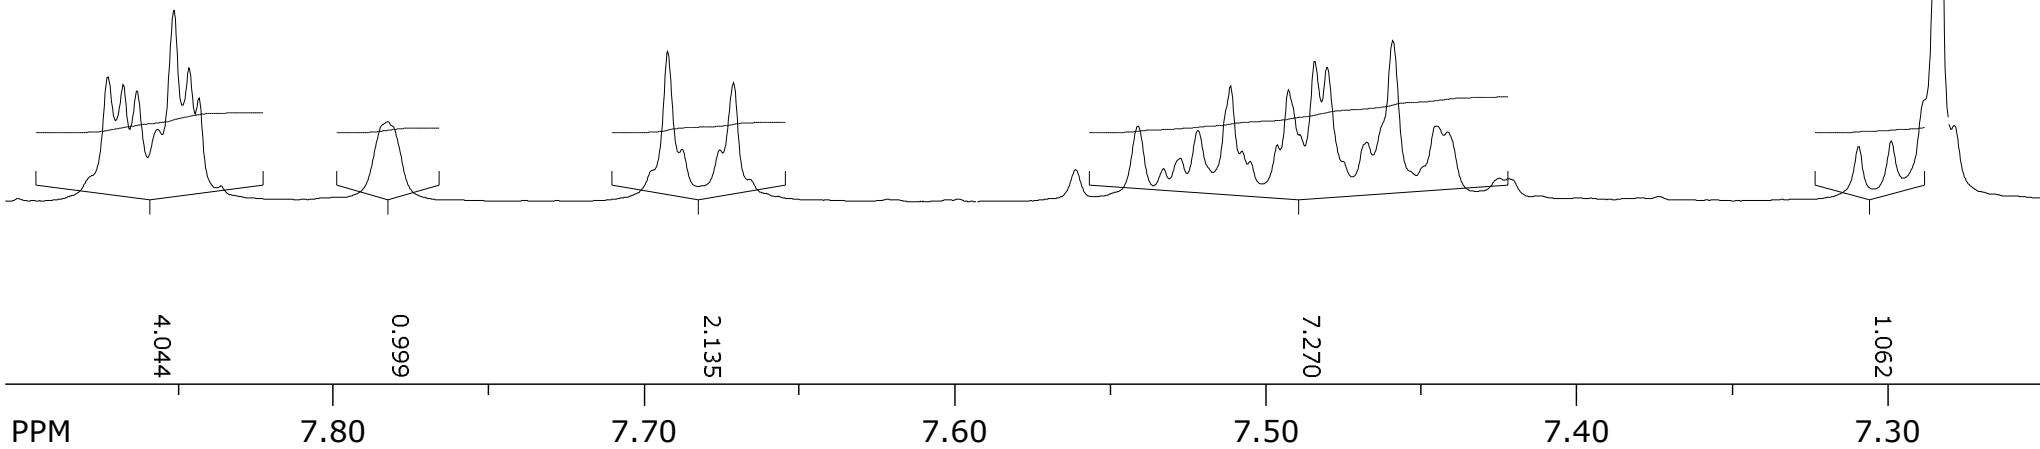

SpinWorks 4: SS 38 P  
C13CPD256 CDCl3 /opt/topspin3.5pl2/nmrdata nmrsu 8

116.399  
121.420  
121.680  
122.769  
123.045  
127.257  
127.754  
129.074  
130.930  
131.430  
131.430  
134.461  
135.970  
136.029  
136.511  
138.203  
138.406  
142.847  
147.903  
151.800  
152.650  
167.800

76.732  
77.050  
77.368

21.146

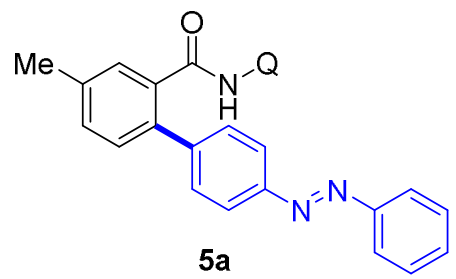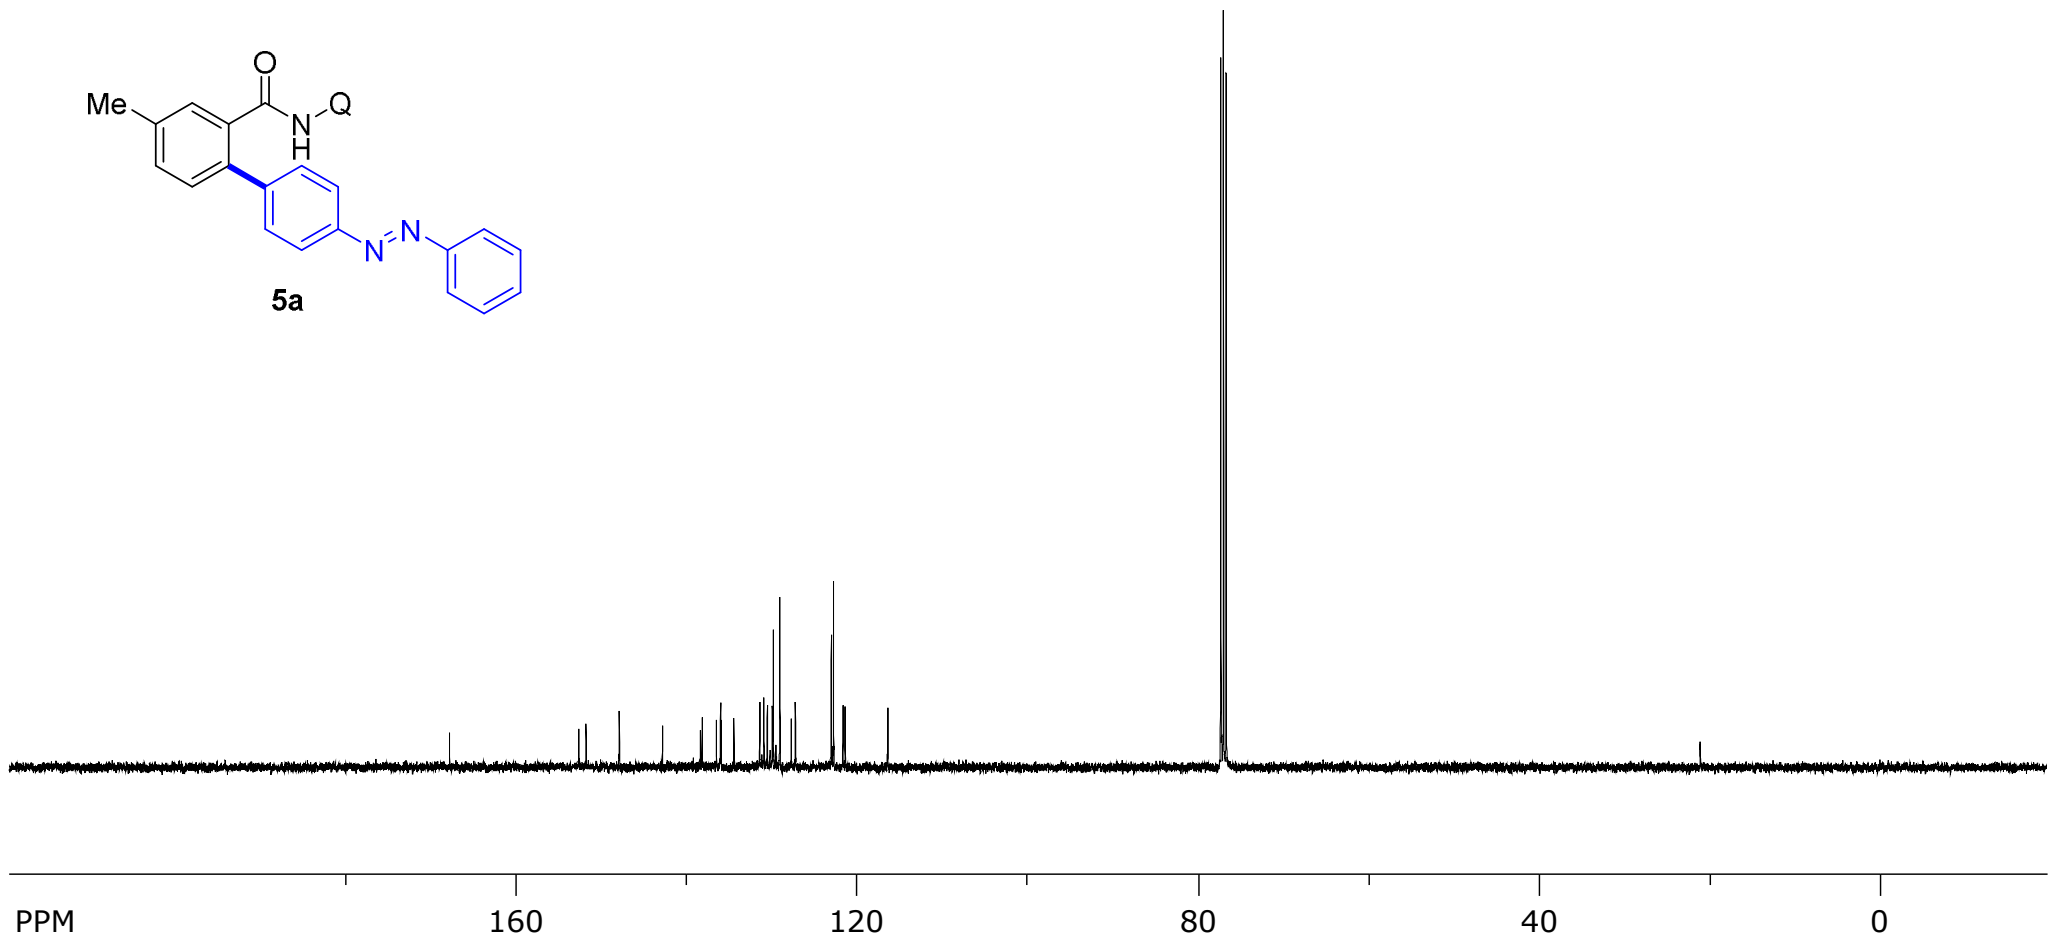

SpinWorks 4: SS 38 P  
C13CPD256 CDCl3 /opt/topspin3.5pl2/nmrdata nmrsu 8

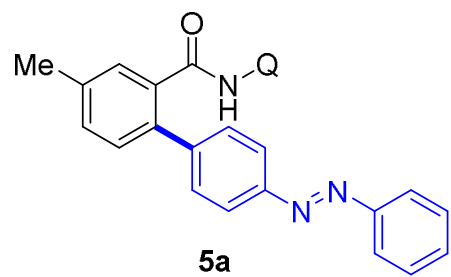

167.800 —

151.800 —  
152.650 —

147.903 —

142.847 —

138.406 —  
138.203 —  
136.511 —  
136.029 —  
135.970 —

134.461 —

131.436 —

130.948 —

130.554 —

129.953 —

129.830 —

129.074 —

127.754 —

127.257 —

123.045 —

122.769 —

121.680 —

121.420 —

116.399 —

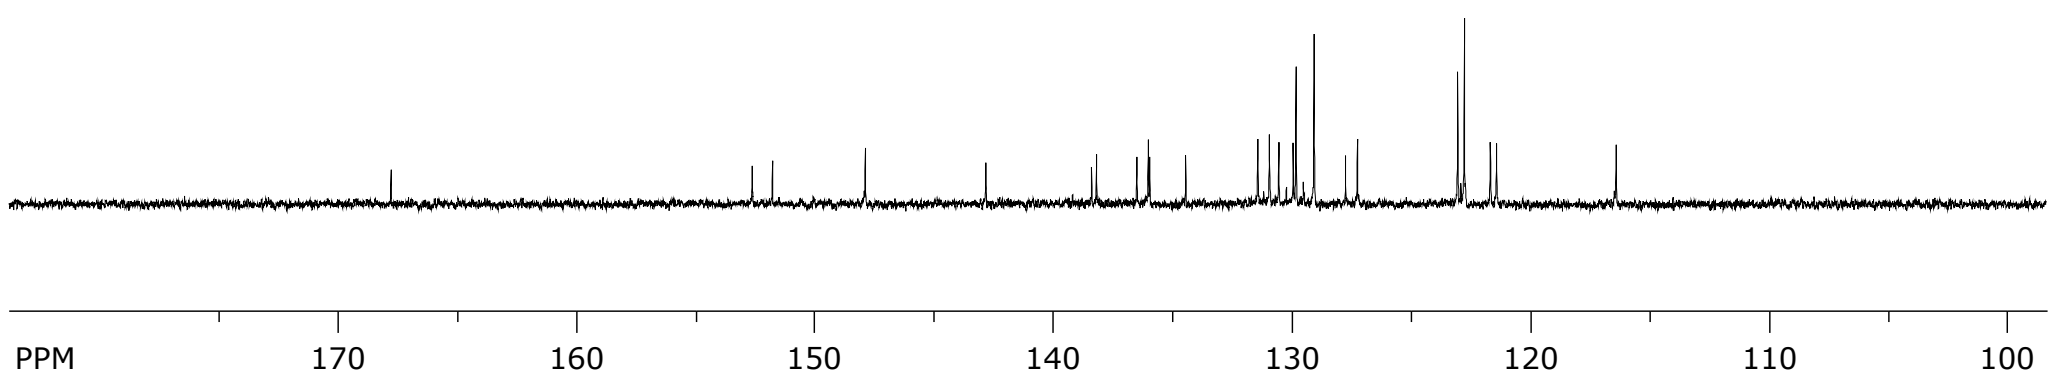

SpinWorks 4: SS 176 P REP  
PROTON CDCl3 /opt/topspin3.5pl2/nmrdata nmrsu 4

7.2861  
7.4680  
7.4843  
7.4851  
7.5043  
7.5244  
7.5409  
7.5558  
7.6546  
7.6735  
7.7705  
7.8748  
7.8885  
7.9050  
8.4507  
8.5384  
8.5558

2.5256

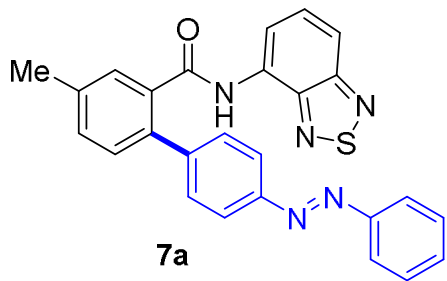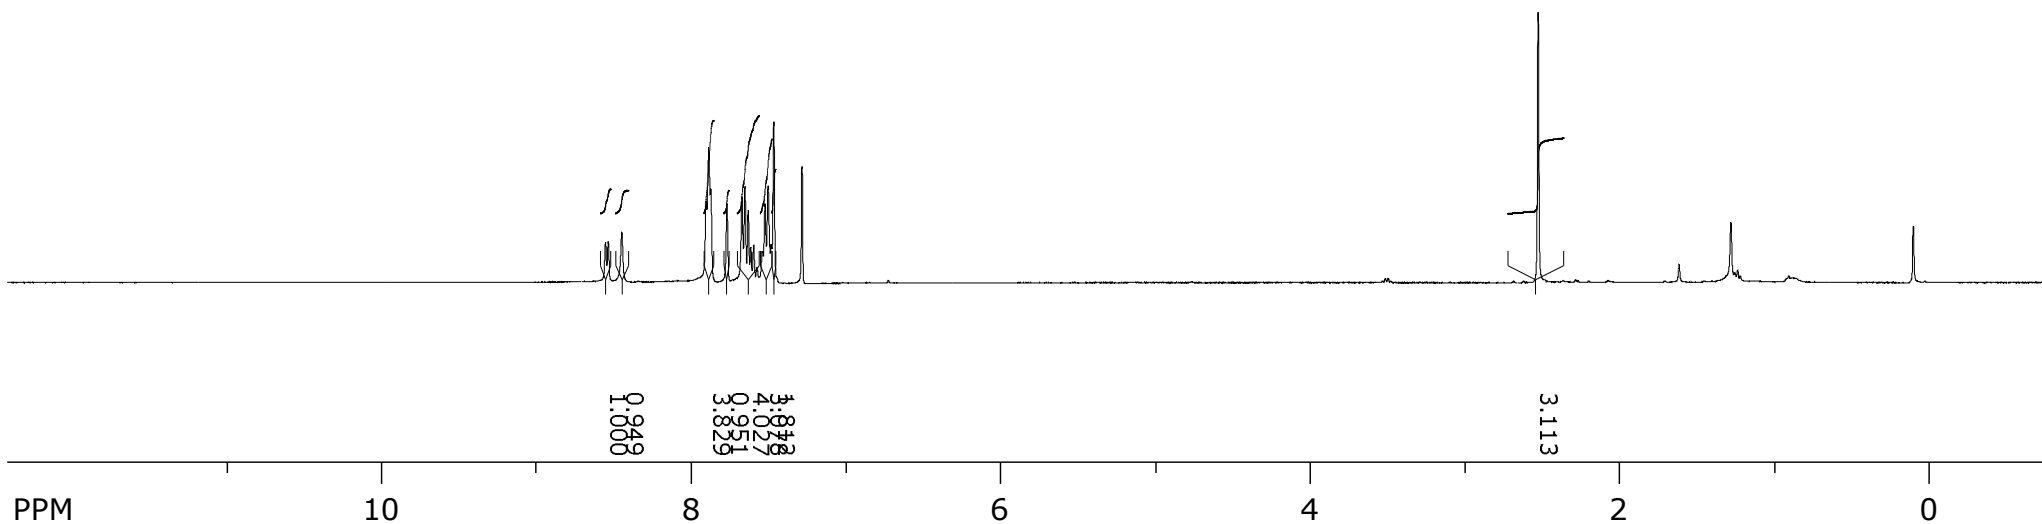

PPM

10

8

6

4

2

0

9

SpinWorks 4: SS 176 P REP  
PROTON CDCl3 /opt/topspin3.5pl2/nmrdata nmrsu 4

|        |        |        |        |        |        |
|--------|--------|--------|--------|--------|--------|
| 8.5384 | 8.4507 | 7.8748 | 7.7705 | 7.5244 | 7.4680 |
| 8.5558 |        | 7.8885 |        | 7.5409 | 7.4843 |
|        |        | 7.9050 |        | 7.5432 | 7.4851 |
|        |        |        |        | 7.5789 | 7.5043 |
|        |        |        |        | 7.5979 |        |
|        |        |        |        | 7.6169 |        |
|        |        |        |        | 7.6331 |        |
|        |        |        |        | 7.6546 |        |
|        |        |        |        | 7.6735 |        |

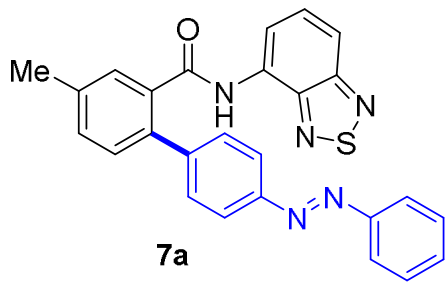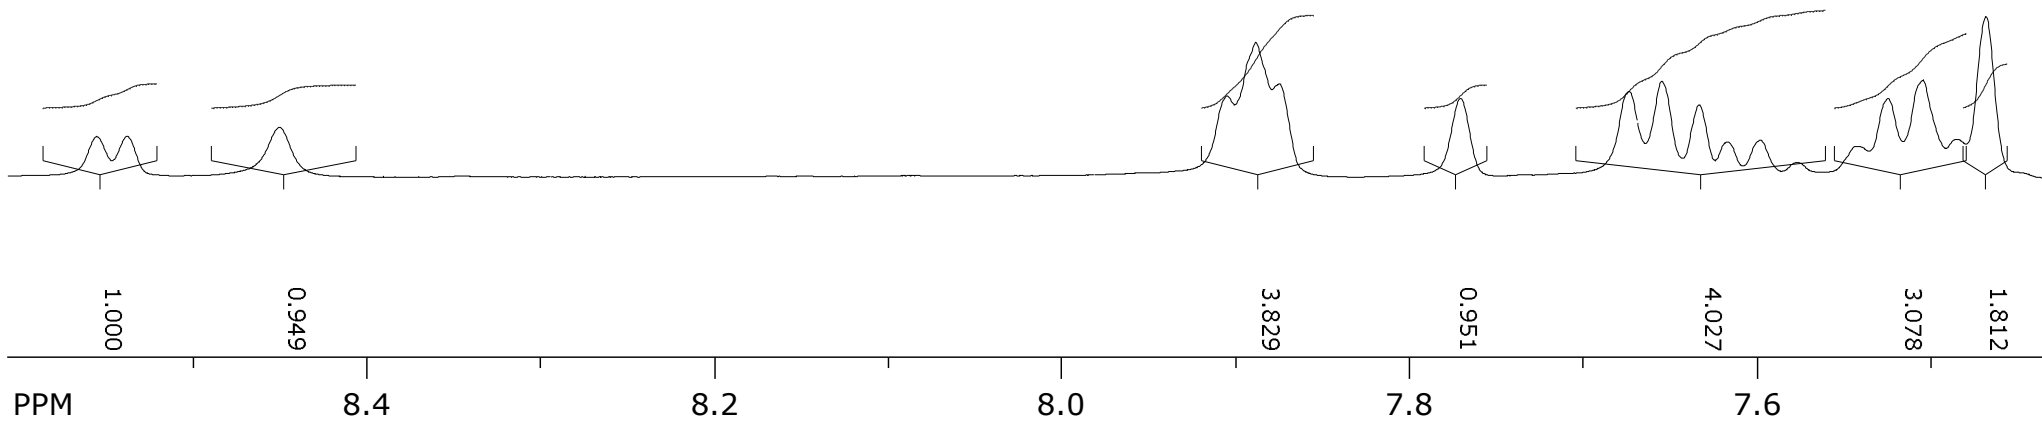

SpinWorks 4: SS 176 P REP  
C13CPD256 CDCl3 /opt/topspin3.5pl2/nmrdata nmrsu 4

167.817  
154.526  
152.049  
147.508  
142.298  
138.465  
136.452  
134.864  
131.957  
131.152  
130.982  
130.596  
130.062  
129.782  
129.707  
129.118  
129.336  
122.861  
115.933  
114.783

76.725  
77.042  
77.360

21.134

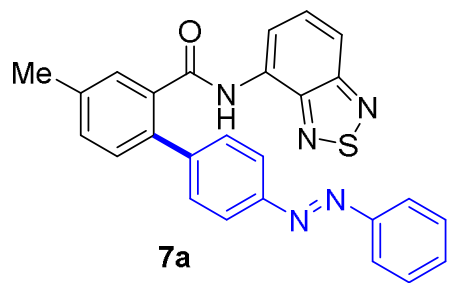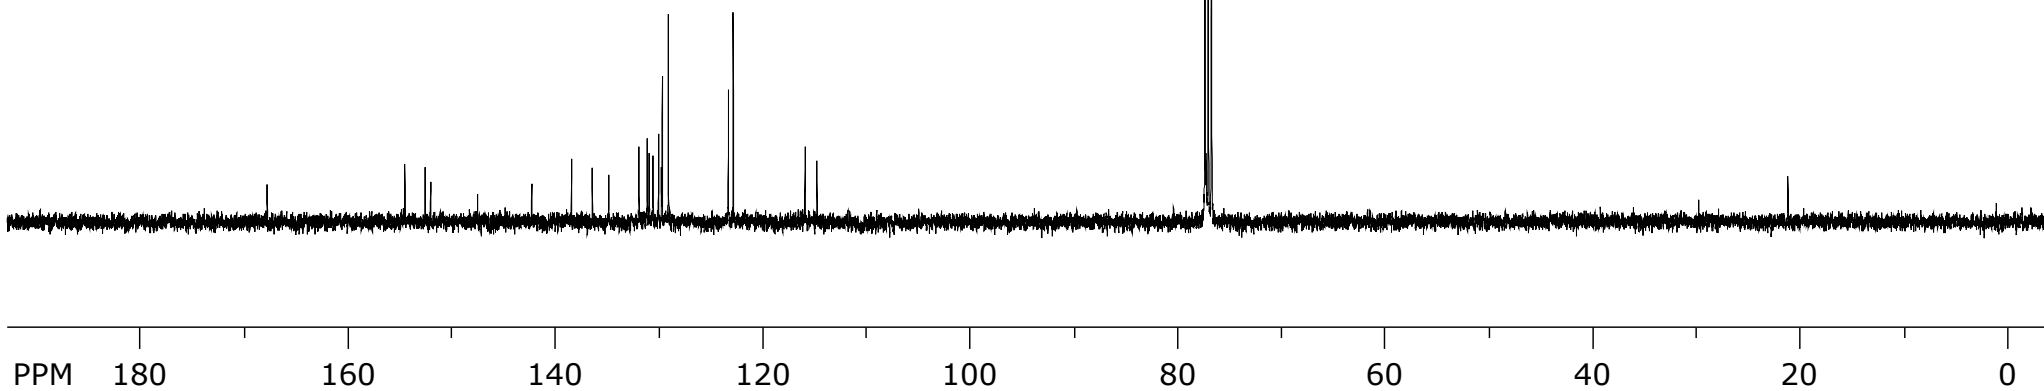

SpinWorks 4: S S 138 P  
PROTON CDCl3 /opt/topspin3.5pl2/nmrdata nmrsu 27

7.0185  
7.0374  
7.0559  
7.2866  
7.3109  
7.3299  
7.3633  
7.3827  
7.3910  
7.3910  
7.3910  
7.3910  
7.6623  
7.6814  
7.7014  
7.9189  
7.9382  
7.9519  
8.3728  
8.4857  
8.5062

1.2917  
2.0272  
2.5024

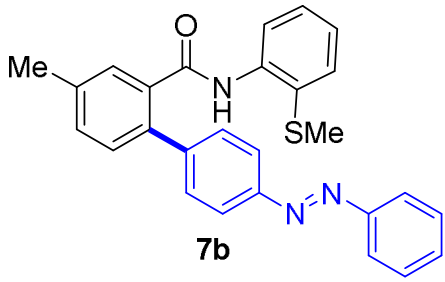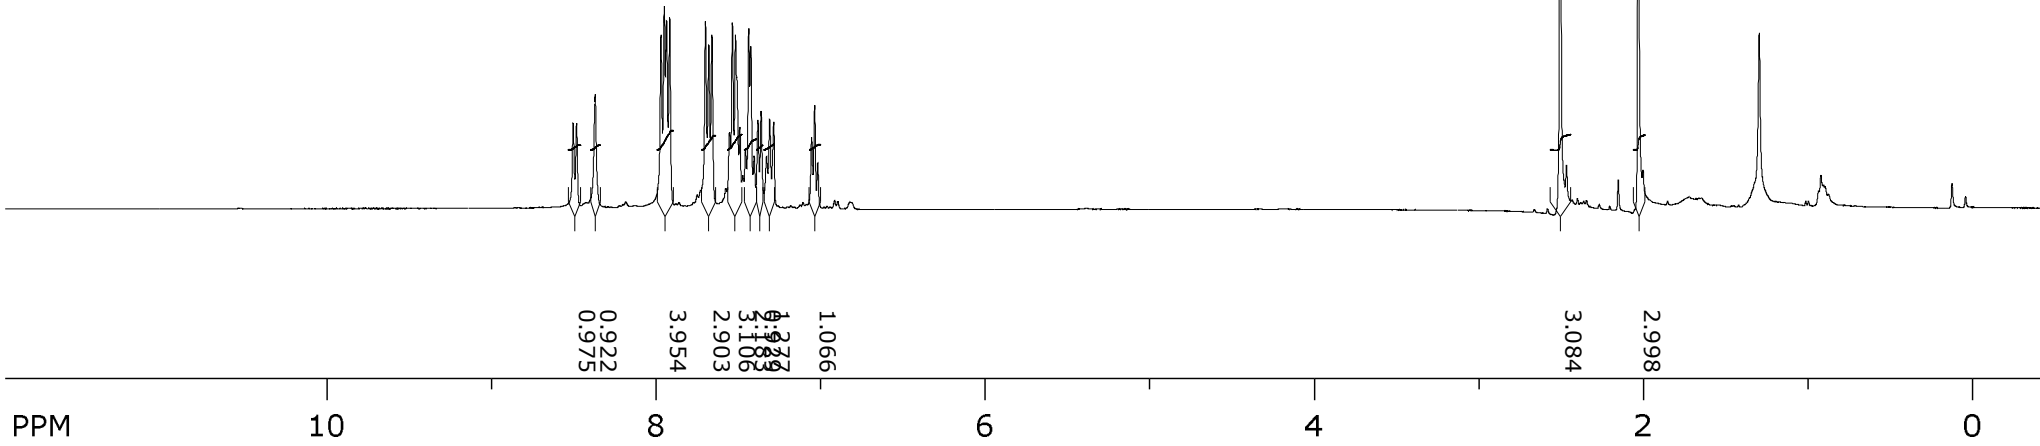



SpinWorks 4: S S 138 P  
PROTON CDCl3 /opt/topspin3.5pl2/nmrdata nmrsu 27

8.4857  
8.5062

8.3728

7.9189  
7.9382  
7.9519  
7.9720

7.6623  
7.6814  
7.7014

7.2866  
7.3109  
7.3299  
7.3633  
7.3827  
7.4057  
7.4258  
7.4383  
7.4578  
7.4926  
7.5113  
7.5191  
7.5376  
7.5553

7.0185  
7.0374  
7.0559

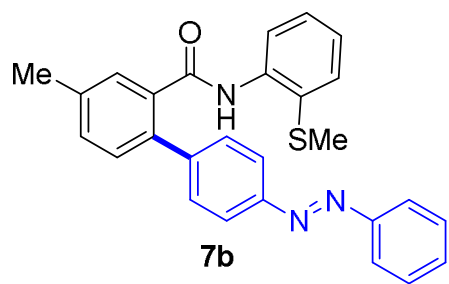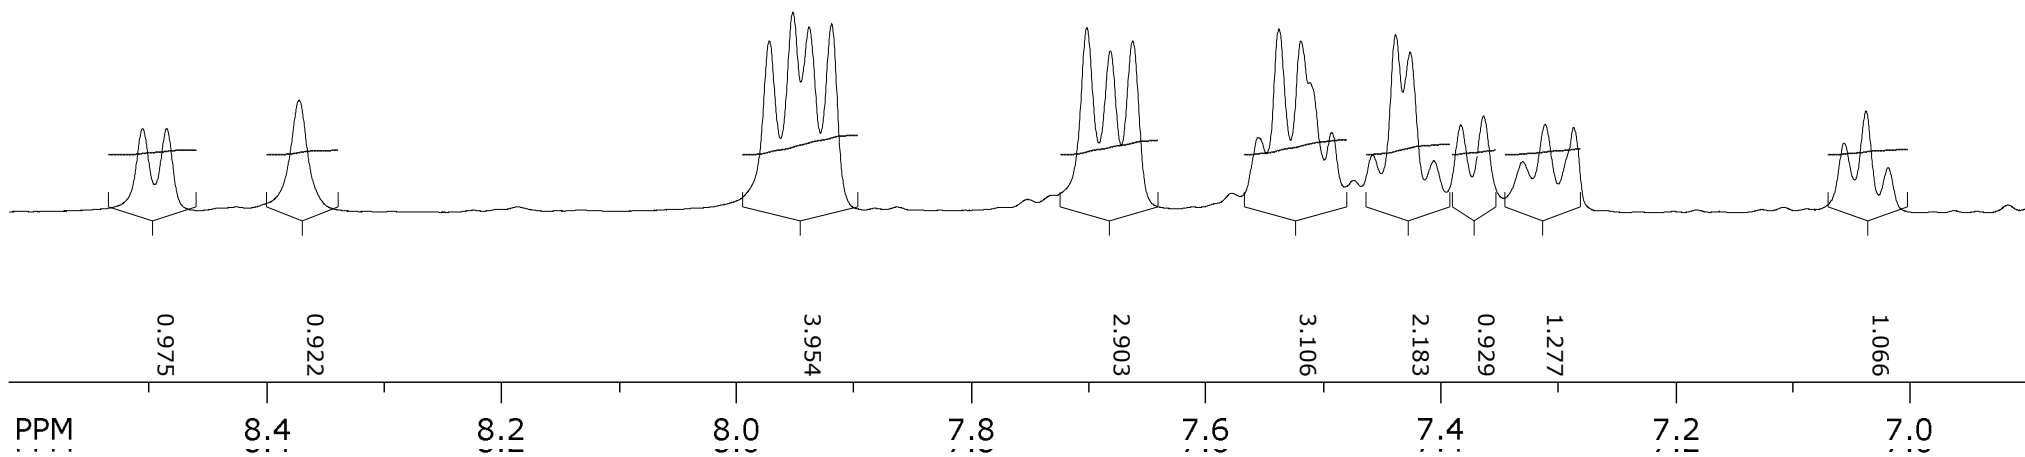

SpinWorks 4: S S 138 P  
C13CPD256 CDCl3 /opt/topspin3.5pl2/nmrdata nmrsu 27

167.992  
152.624  
151.826  
142.521  
138.376  
138.351  
135.987  
135.751  
133.136  
131.499  
131.136  
130.578  
129.716  
129.131  
128.893  
125.407  
124.444  
123.304  
122.912  
120.113

76.772  
77.090  
77.407

19.234  
21.136

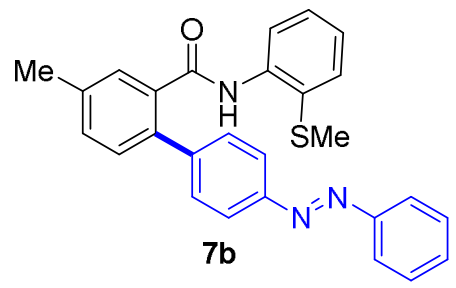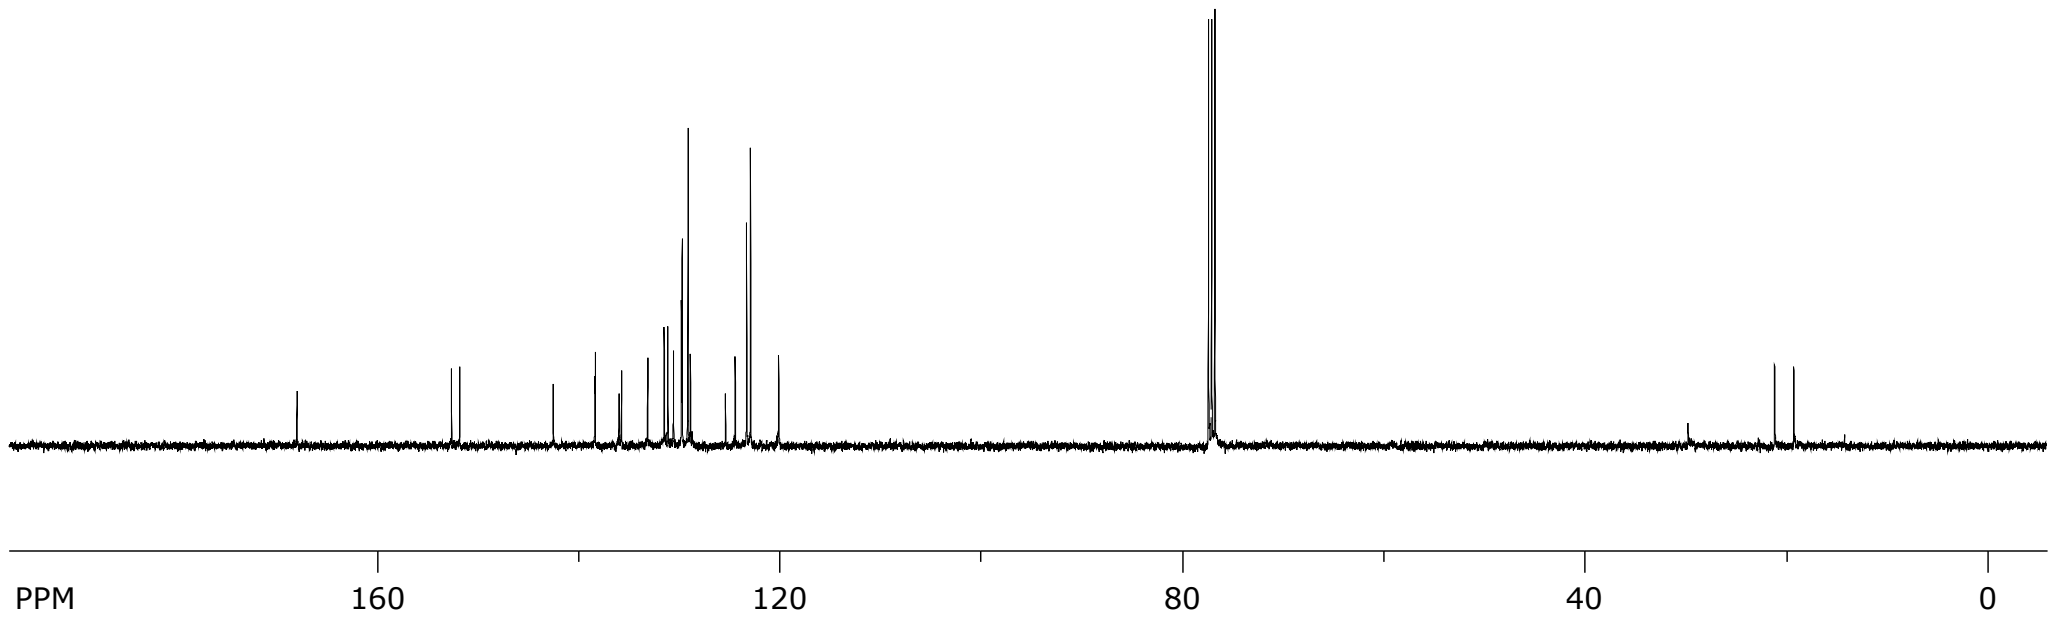

SS-41-p rep

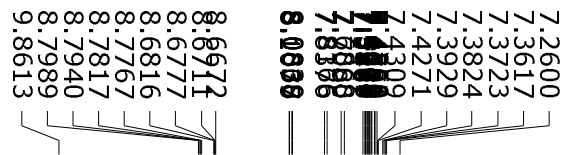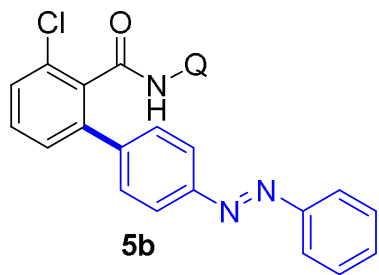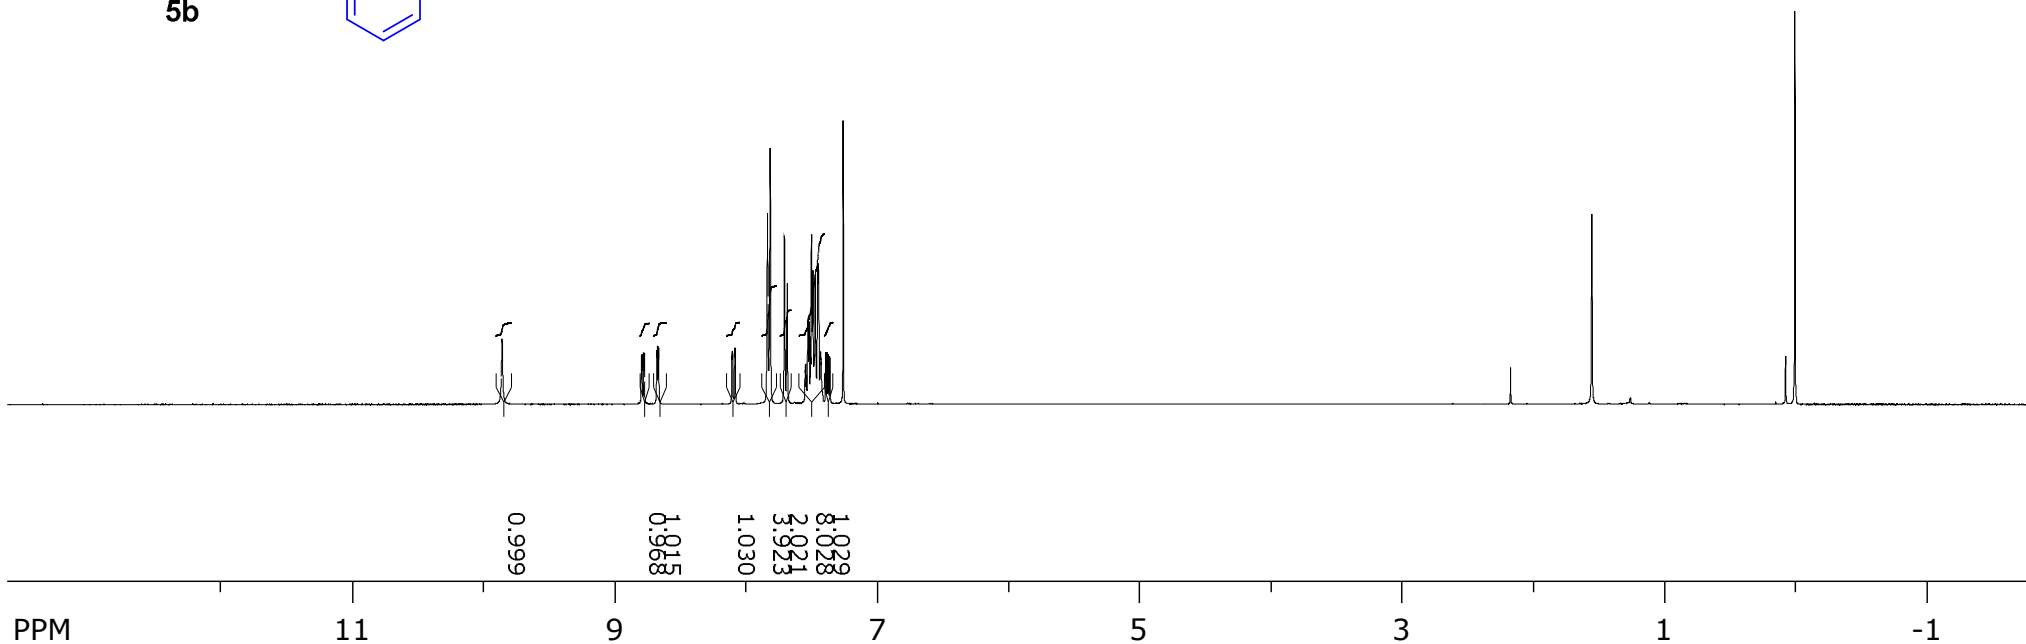

9.8613

8.6672  
8.6711  
8.6777  
8.6816  
8.7767  
8.7817  
8.7940  
8.7989

8.0830  
8.0868  
8.1037  
8.1075

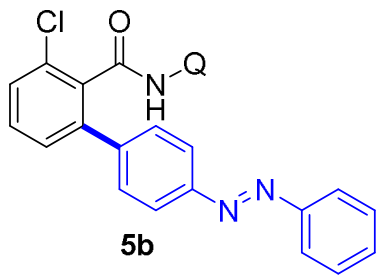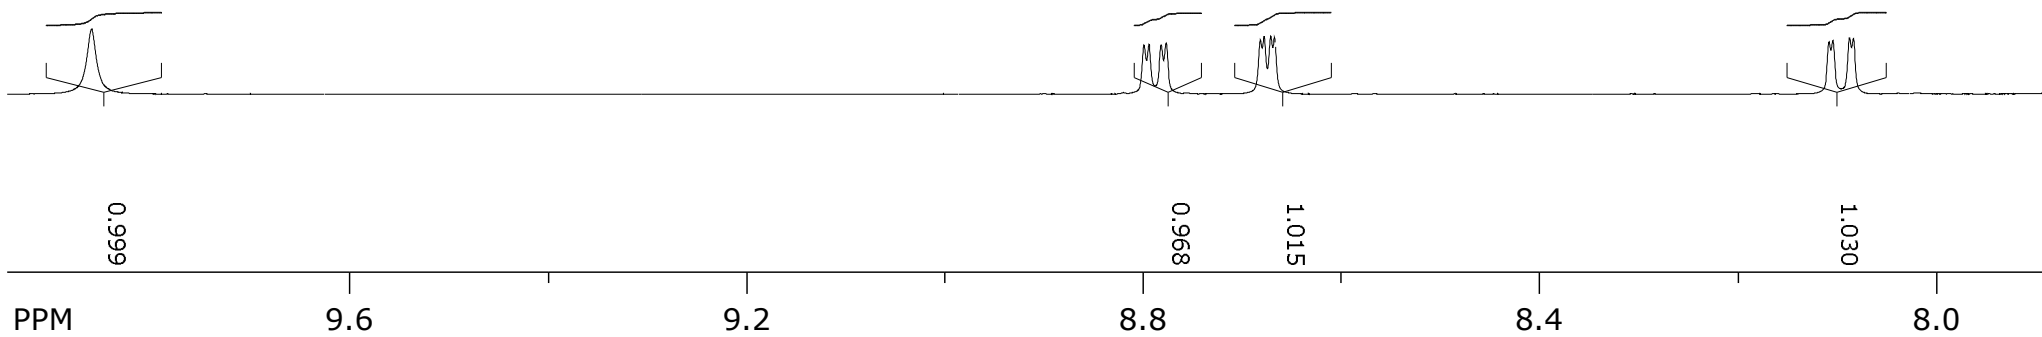

SpinWorks 4: DC-175

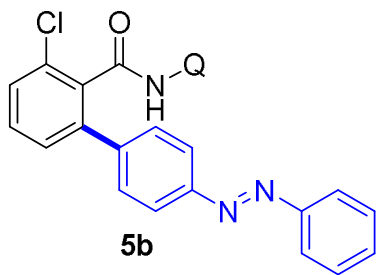

7.8376

7.8166

7.7080

7.6868

7.5467

7.5305

7.5197

7.5097

7.5022

7.4968

7.4908

7.4812

7.4736

7.4551

7.4500

7.4350

7.4309

7.4271

7.3929

7.3824

7.3723

7.3617

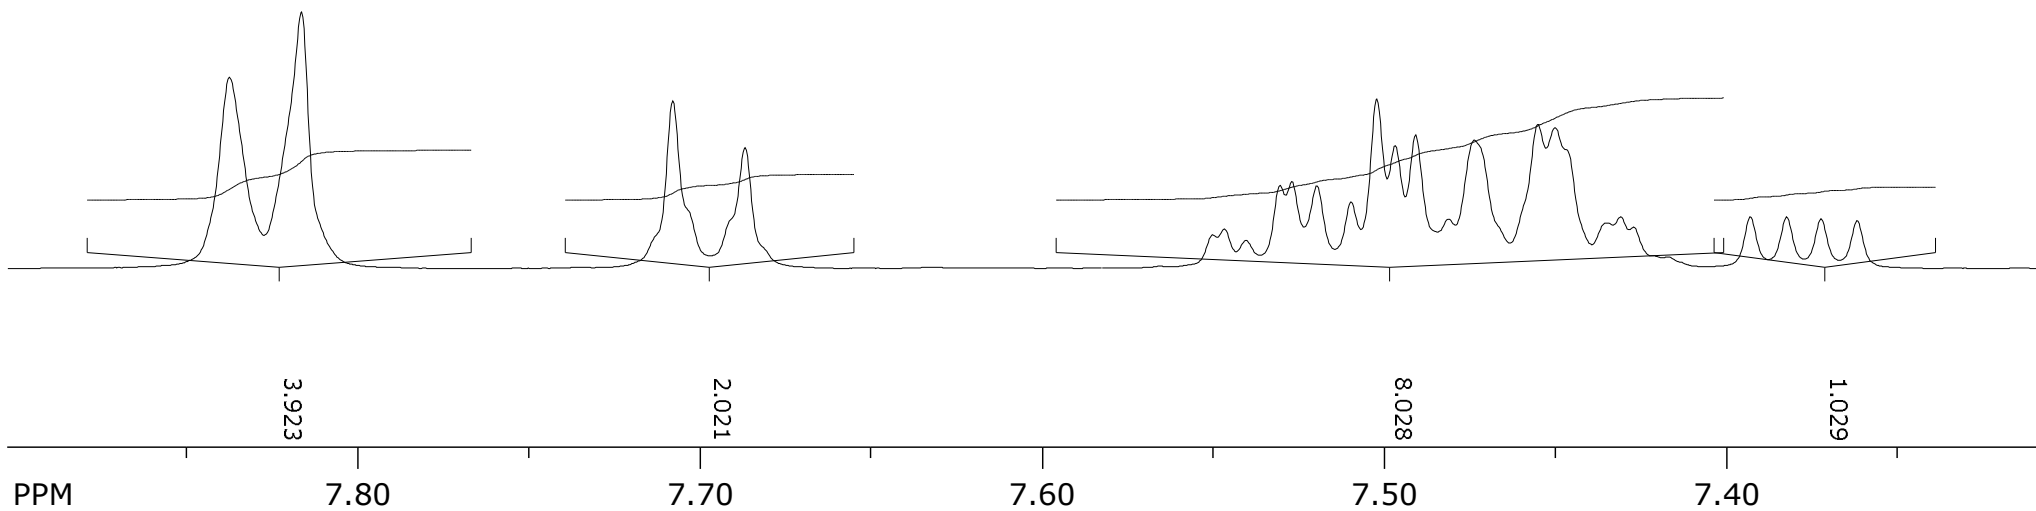

SpinWorks 4: SS 41 P REP

C13CPD CDCl3 /opt/topspin3.5pl2/nmrdata nmrsu 59

164.942  
152.566  
151.894  
148.235  
141.760  
140.915  
138.381  
136.275  
133.989  
133.076  
132.047  
131.105  
130.405  
129.489  
128.622  
127.882  
127.313  
122.988  
122.835  
122.223  
121.626  
116.934

76.734  
77.051  
77.369

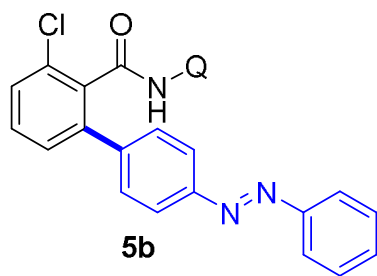

5b

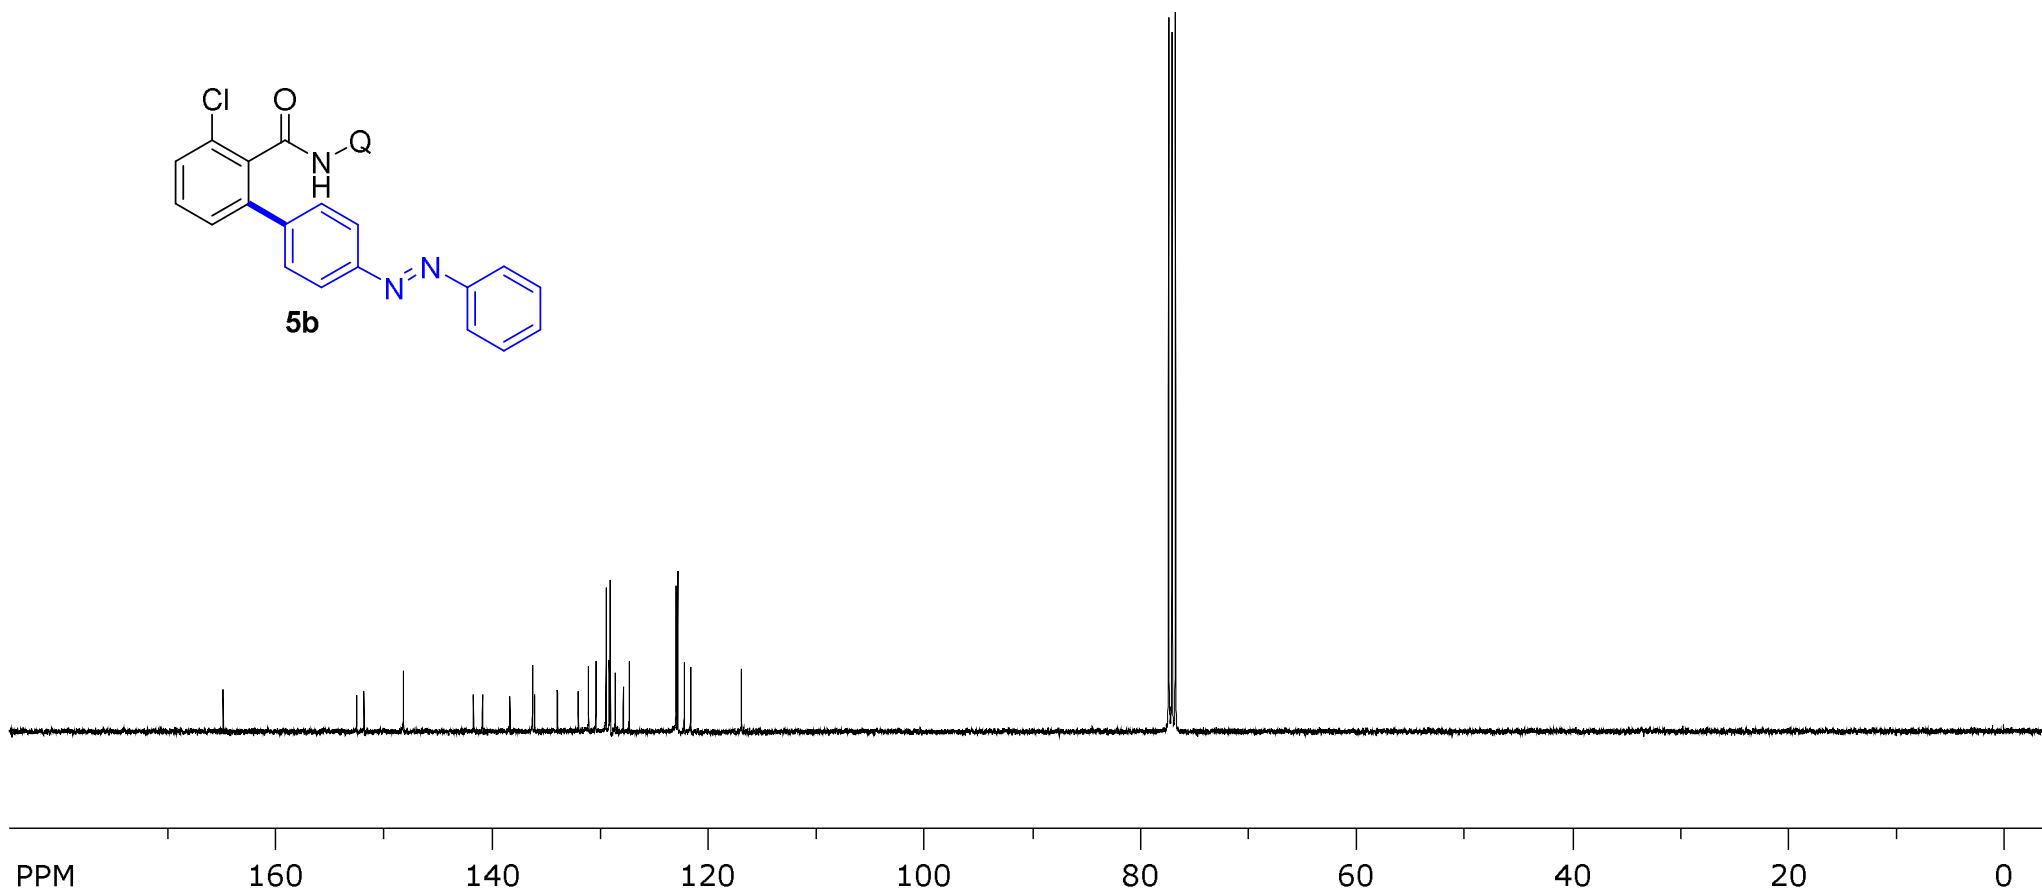

SpinWorks 4: SS 41 P REP  
C13CPD CDCl3 /opt/topspin3.5pl2/nmrdata nmrsu 59

164.942

151.894  
152.566

148.235

140.915  
141.760

138.381  
136.076  
136.275

133.989  
132.047  
131.105  
130.405  
129.467  
129.186  
129.080  
128.622  
127.882  
127.313

122.988  
122.835  
122.223  
121.626

116.934

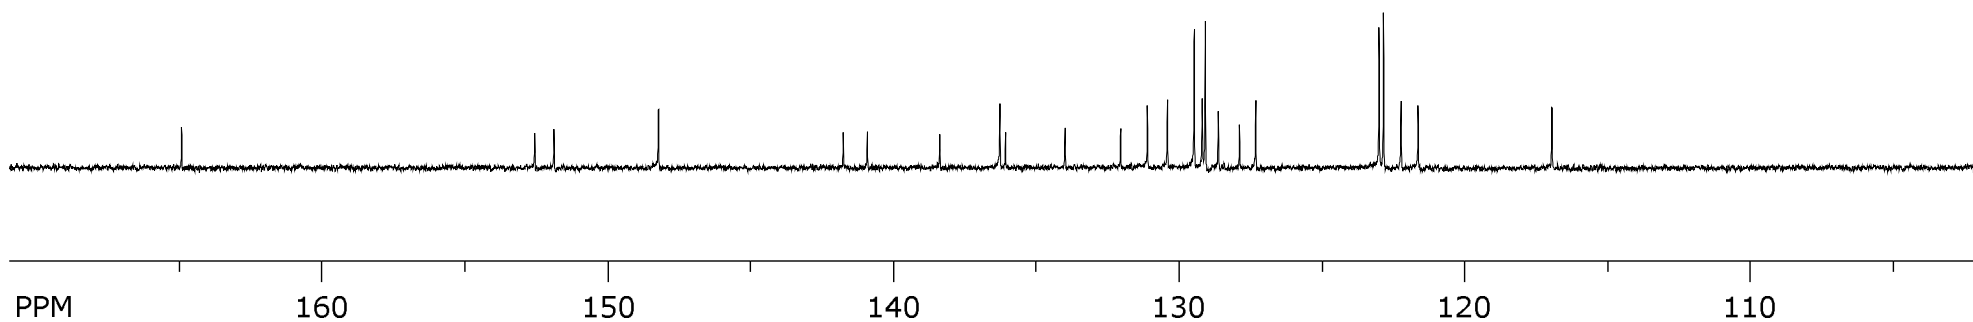

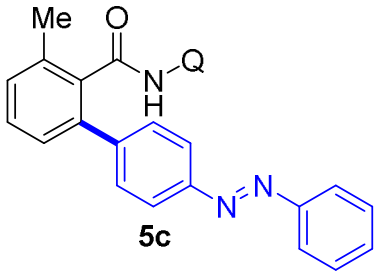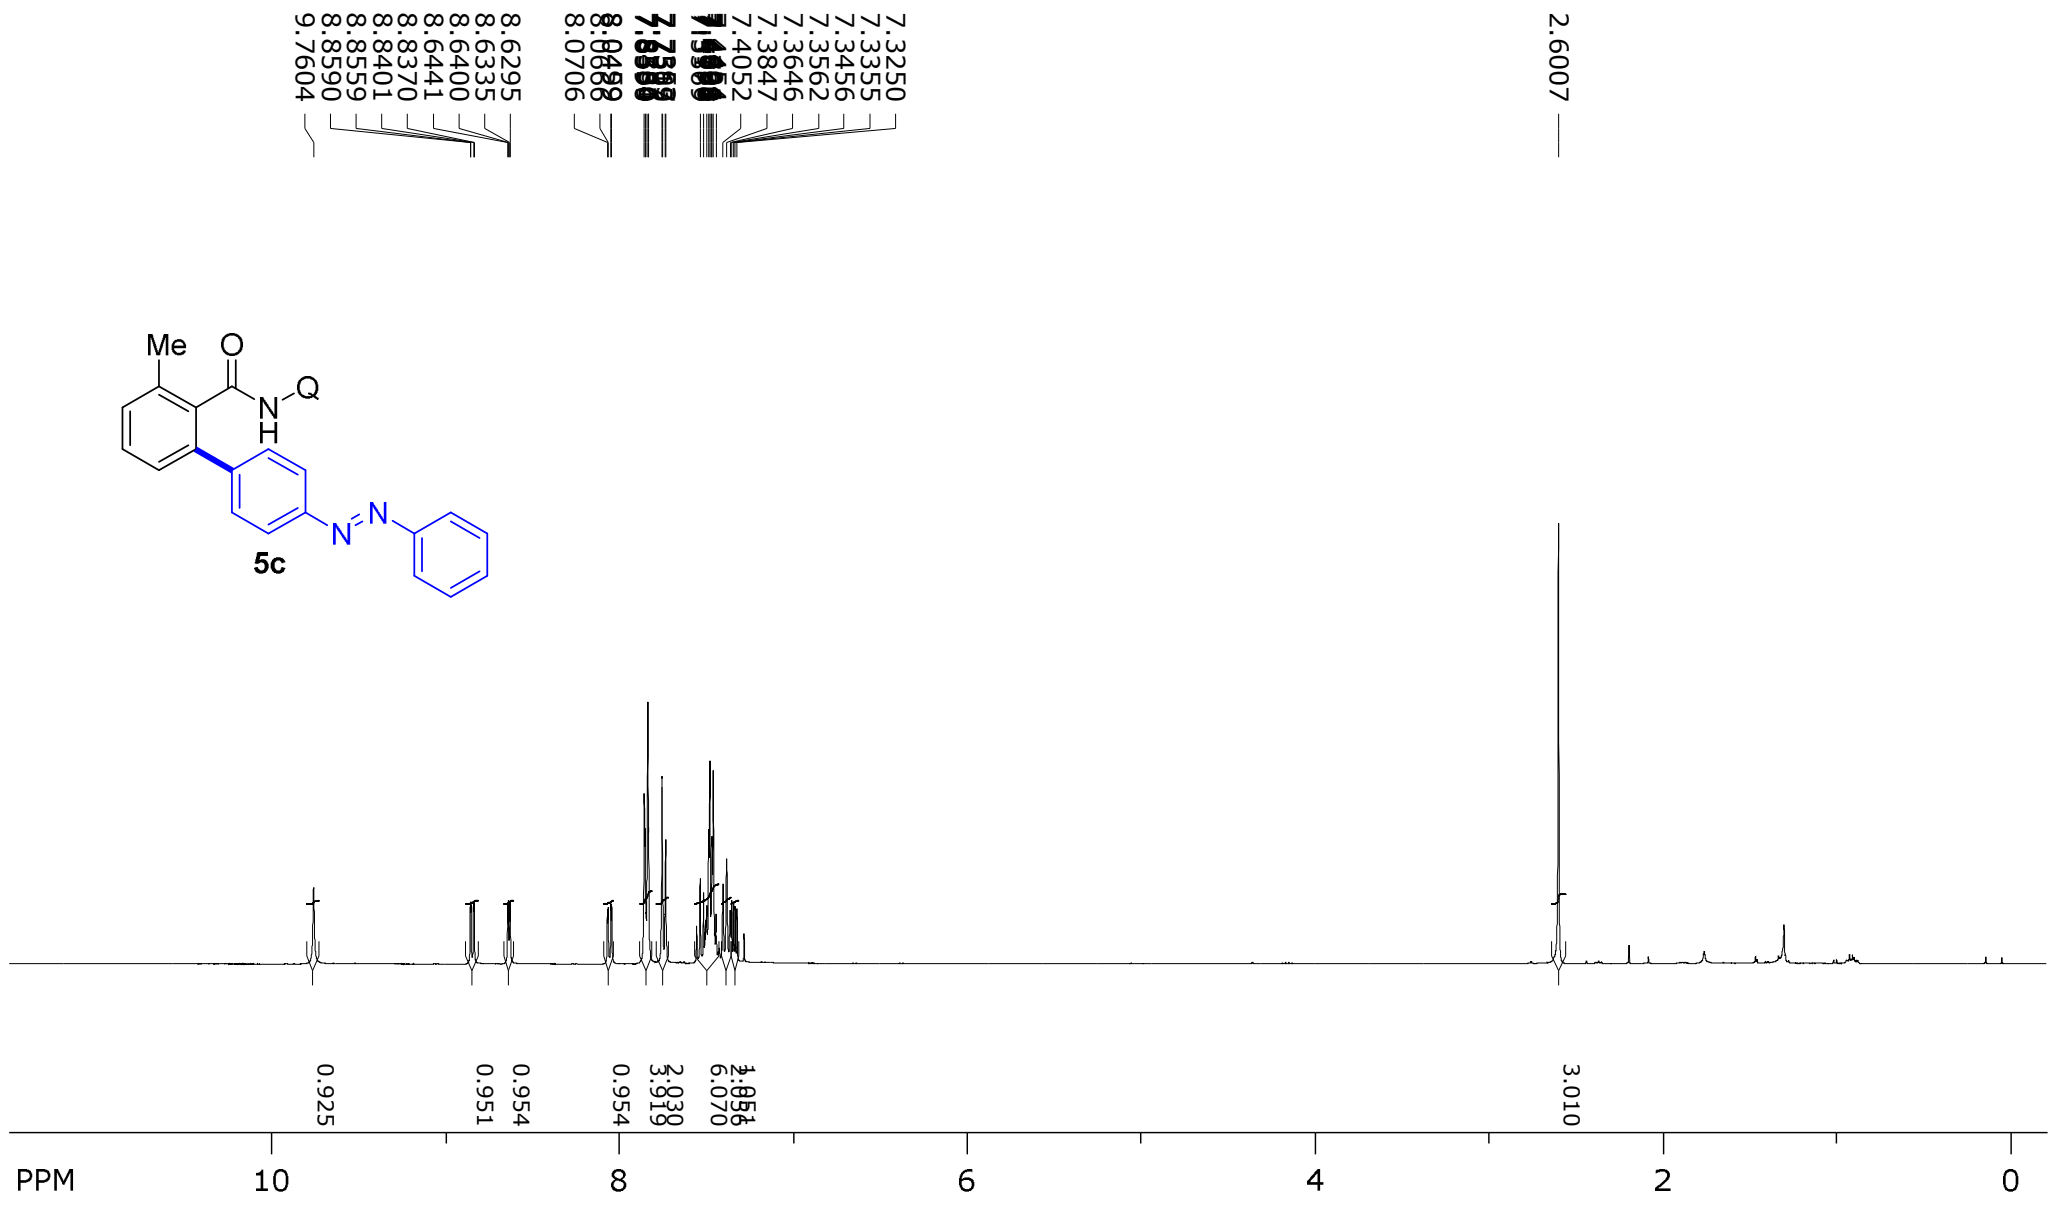



SpinWorks 4: ss-68-p (trans2)

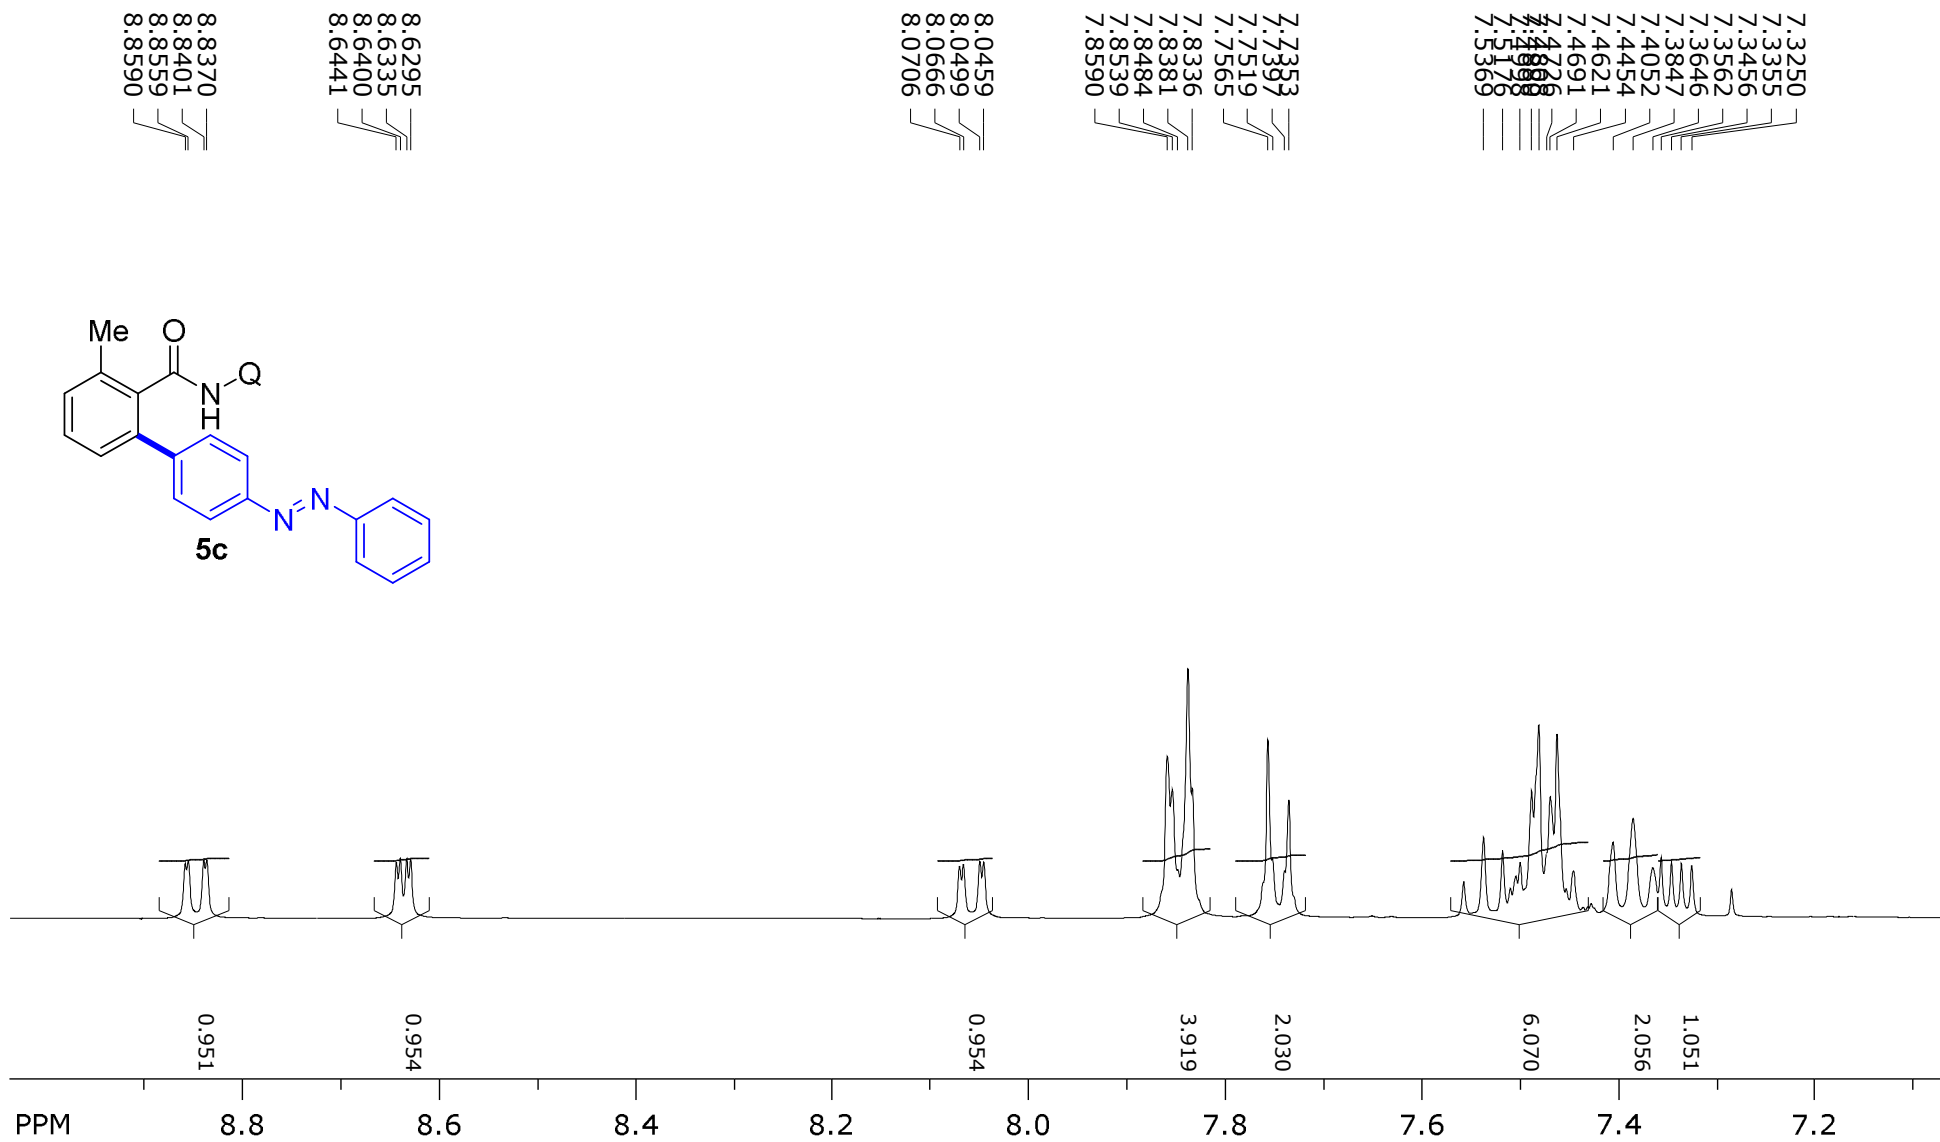

SpinWorks 4: ss-68-p (trans2)

7.5369 —  
7.5176 —  
7.4998 —  
7.4880 —  
7.4808 —  
7.4726 —  
7.4691 —  
7.4621 —  
7.4454 —  
7.4052 —  
7.3847 —  
7.3646 —  
7.3562 —  
7.3456 —  
7.3355 —  
7.3250 —

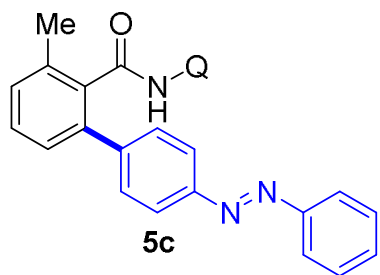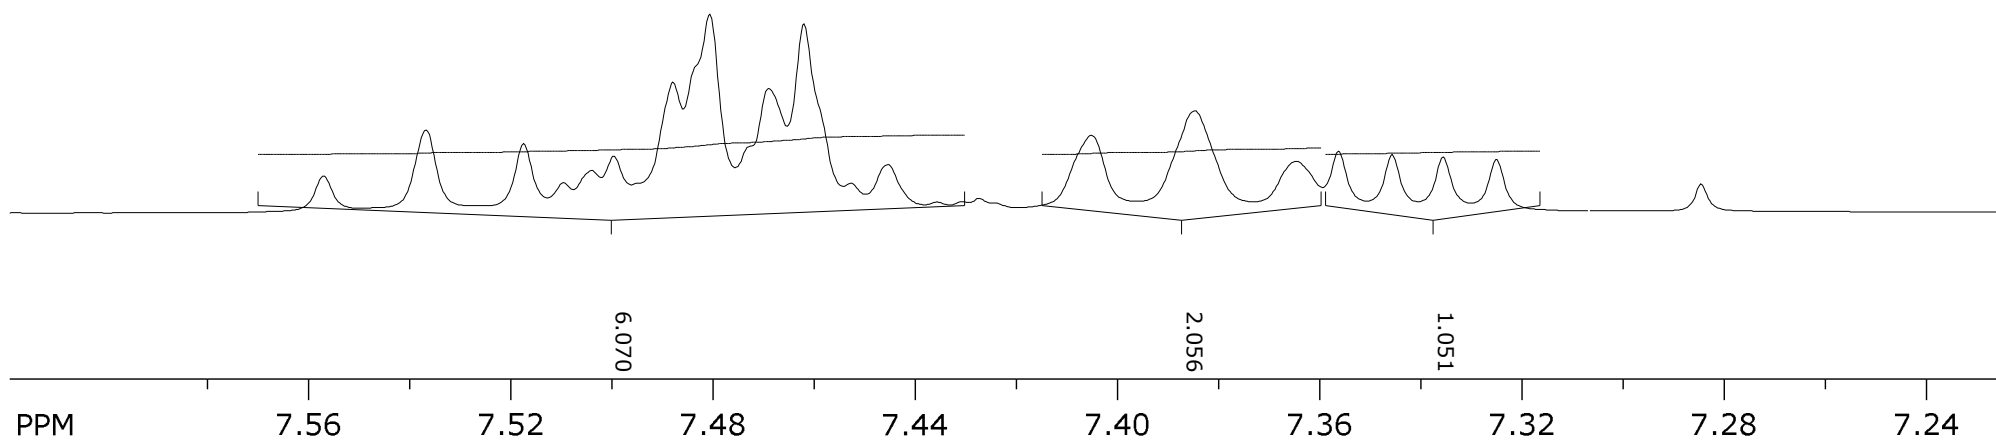

SpinWorks 4: SS 68 P  
C13CPD256 CDCl3 /opt/topspin3.5pl2/nmrdata nmrsu 58

168.127 —  
152.610  
148.116  
143.261  
138.747  
138.403  
136.845  
136.170  
136.082  
134.287  
130.953  
130.061  
129.950  
127.847  
127.622  
127.249  
122.896  
122.787  
121.943  
121.532  
116.655  
76.799  
77.116  
77.435  
19.873 —

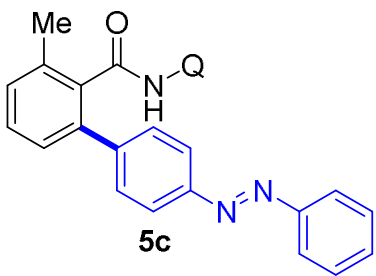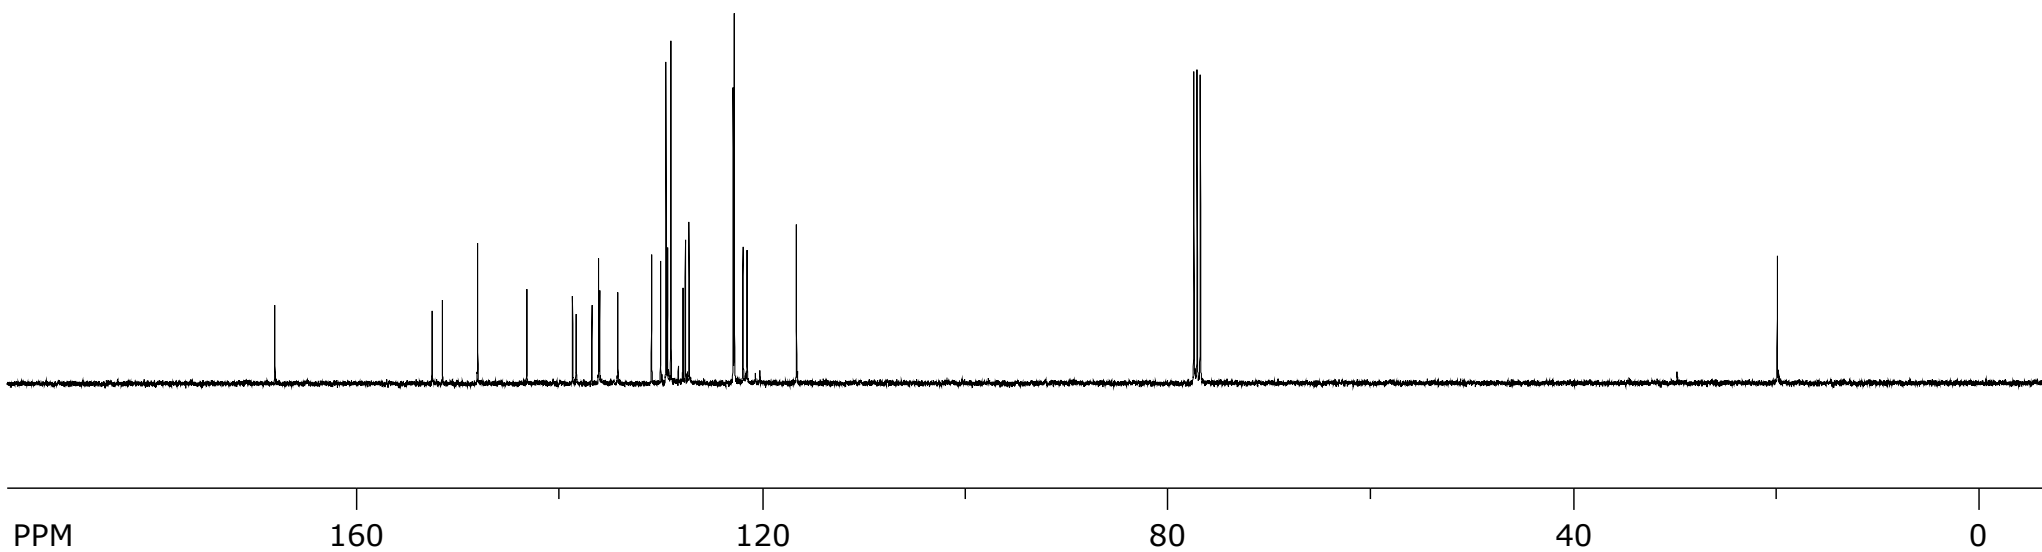

SpinWorks 4: SS 68 P  
C13CPD256 CDCl3 /opt/topspin3.5pl2/nmrdata nmrsu 58

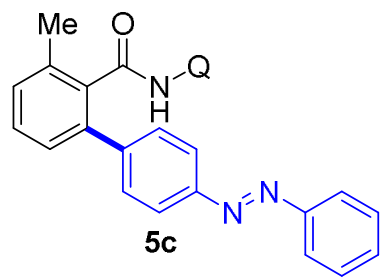

168.127 —

151.595 —  
152.610 —

148.116 —

143.261 —

138.747 —  
138.403 —  
136.845 —  
136.170 —  
136.082 —

134.287 —

130.953 —  
130.061 —  
129.526 —  
129.380 —  
129.050 —  
127.847 —  
127.622 —  
127.249 —

122.896 —  
122.787 —  
121.943 —  
121.532 —

116.655 —

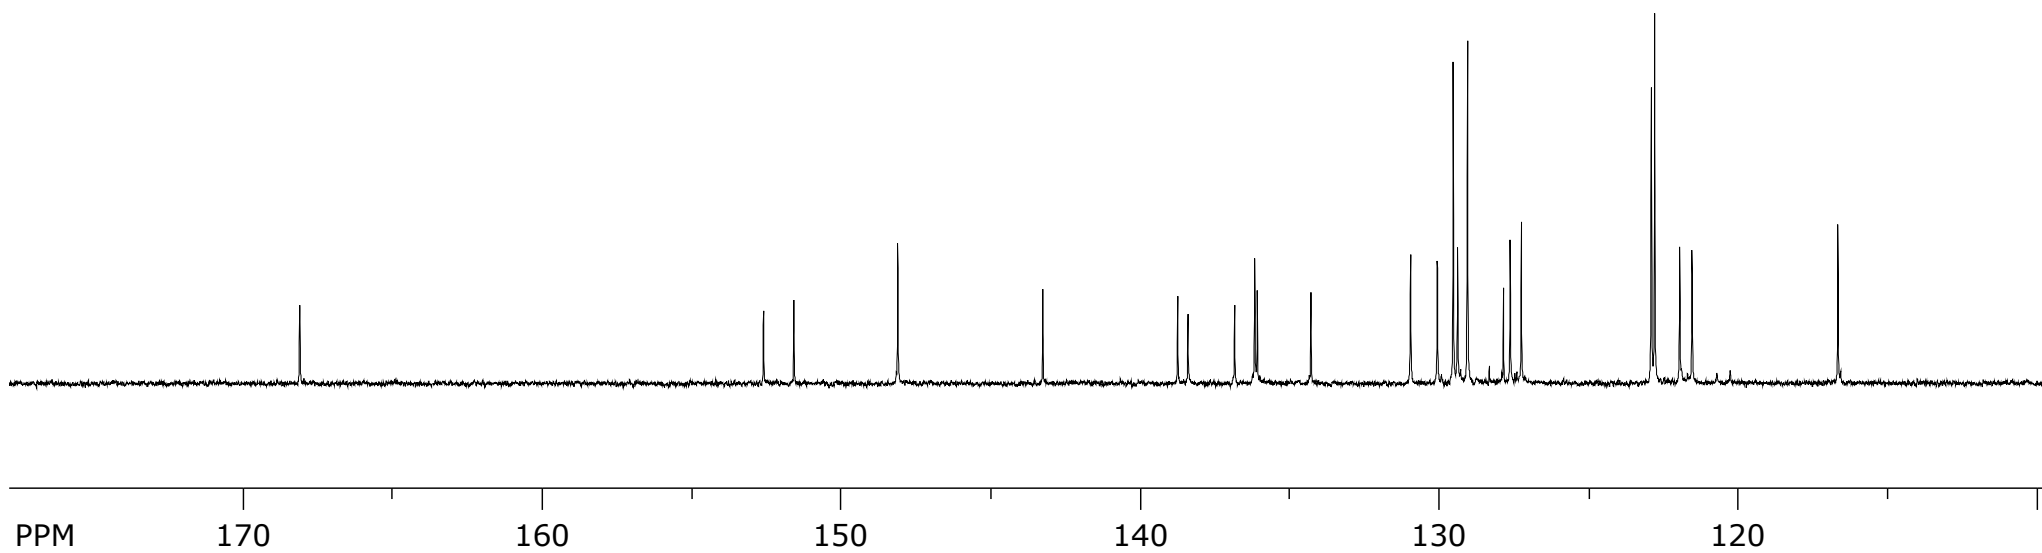

SpinWorks 4: DC-176  
SS-78-p rep

8.66842  
8.66811  
8.67477  
8.6785  
8.7272  
8.7332  
8.7435  
8.7496  
10.1392  
6.9797  
7.0003  
7.0730  
7.0912  
7.1097  
7.1278  
7.1481  
7.2578  
7.3014  
7.3014  
7.3014  
8.0909

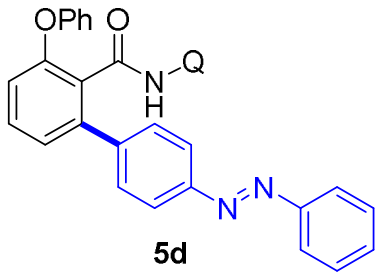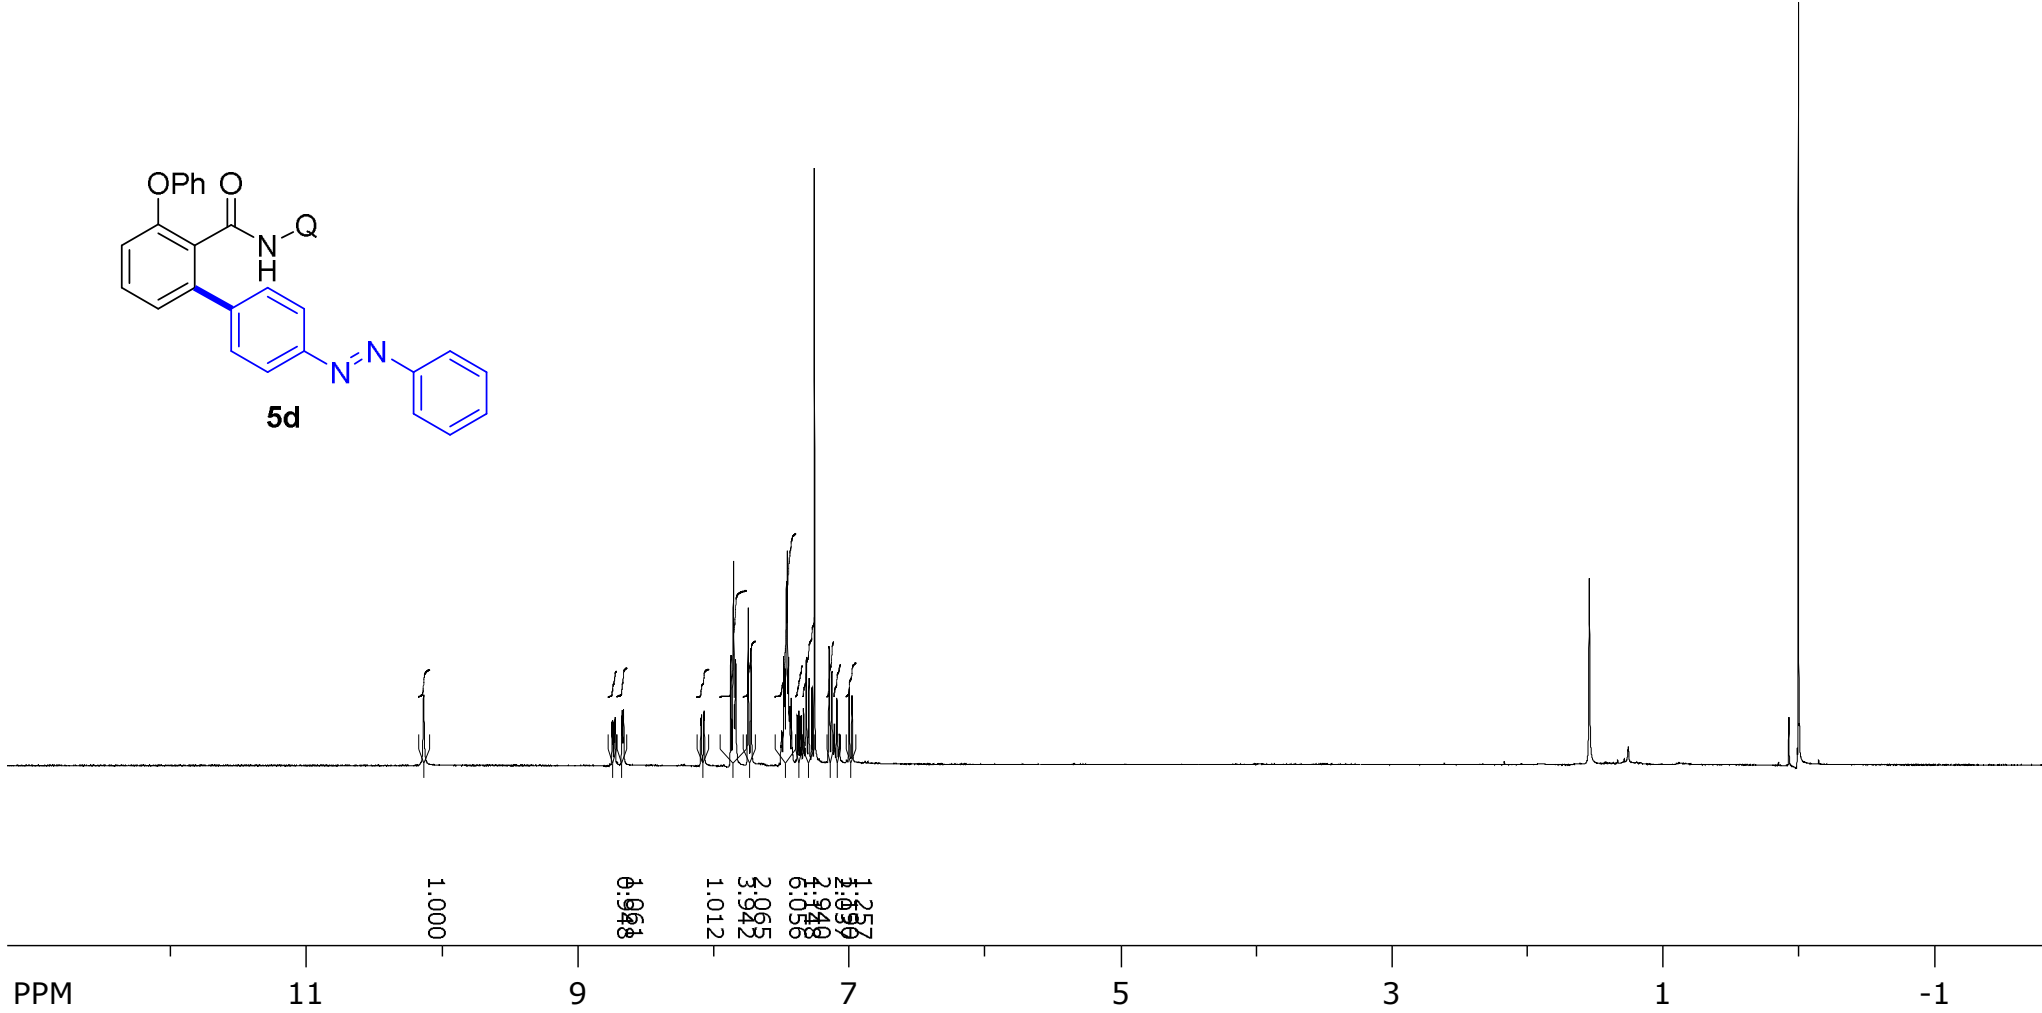

SpinWorks 4: DC-176

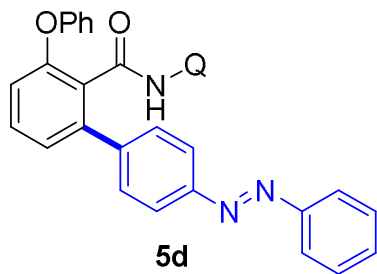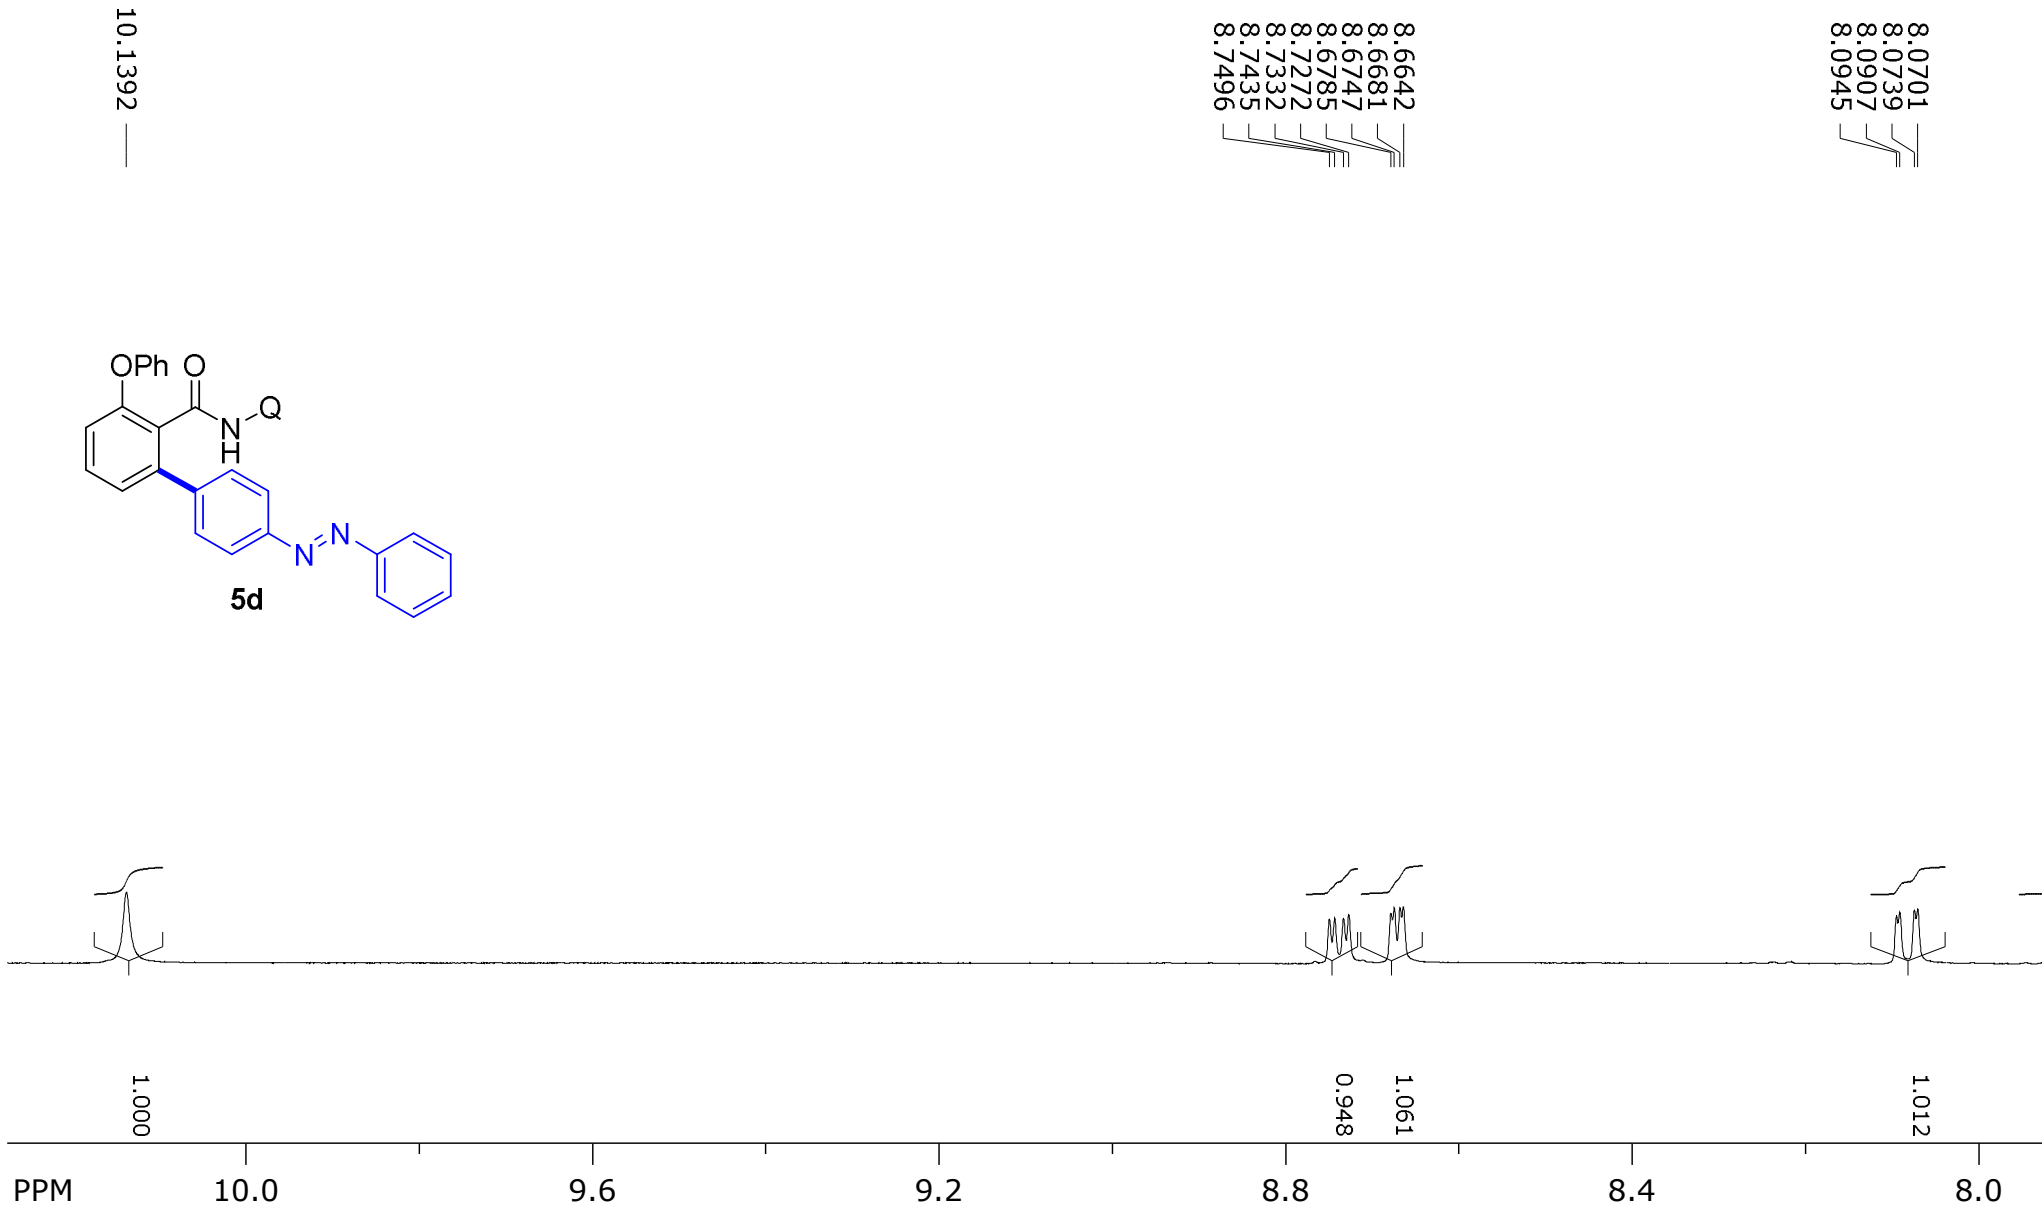

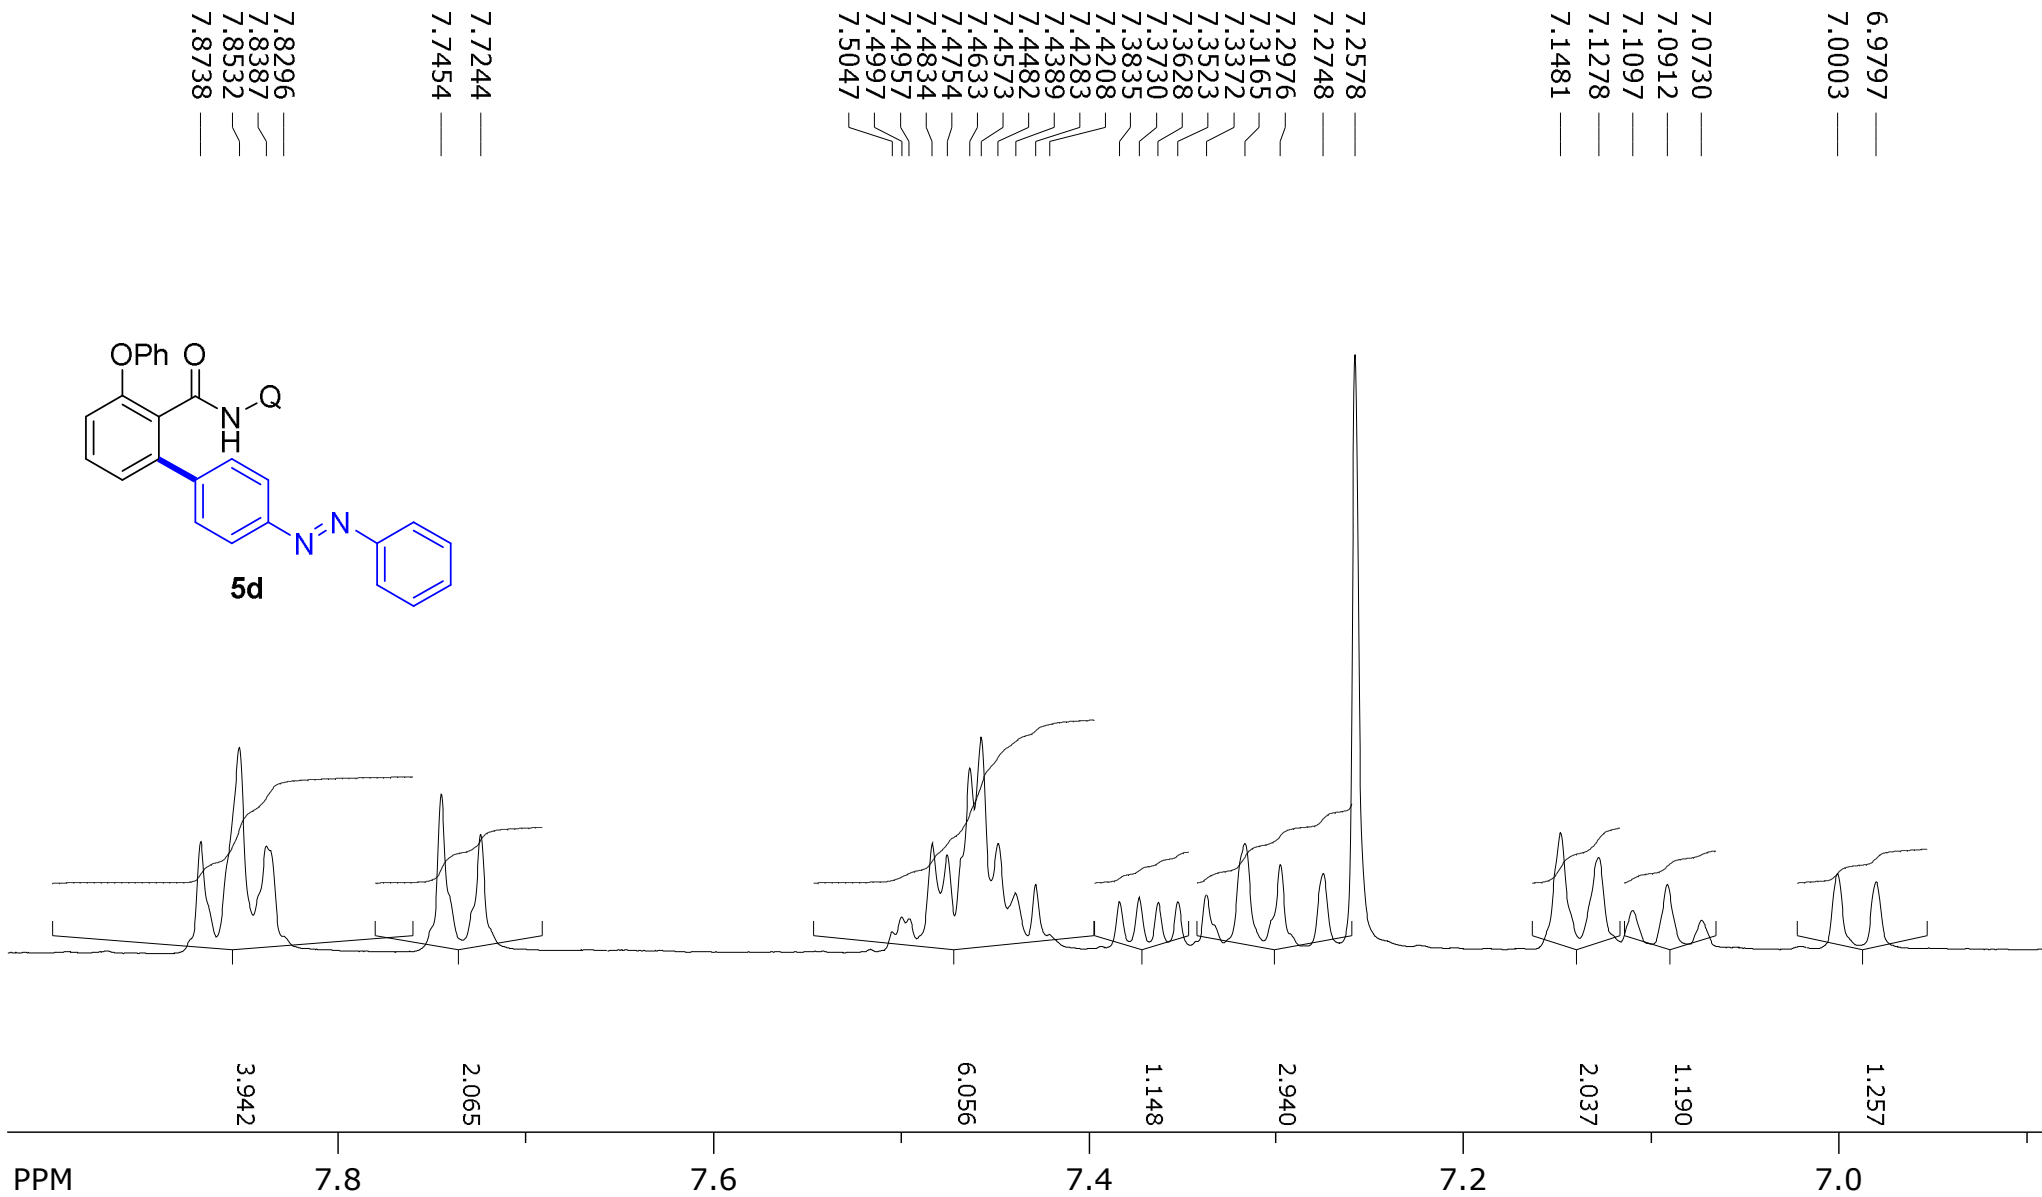

SpinWorks 4: SS 78 P REP  
C13CPD CDCl3 /opt/topspin3.5pl2/nmrdata nmrsu 49

116.790  
117.583  
119.738  
121.505  
121.767  
122.819  
122.986  
123.922  
124.940  
126.819  
126.819  
129.806  
130.550  
130.980  
134.407  
136.188  
138.426  
141.393  
142.608  
148.065  
151.774  
152.672  
155.050  
156.671  
164.831

76.732  
77.049  
77.367

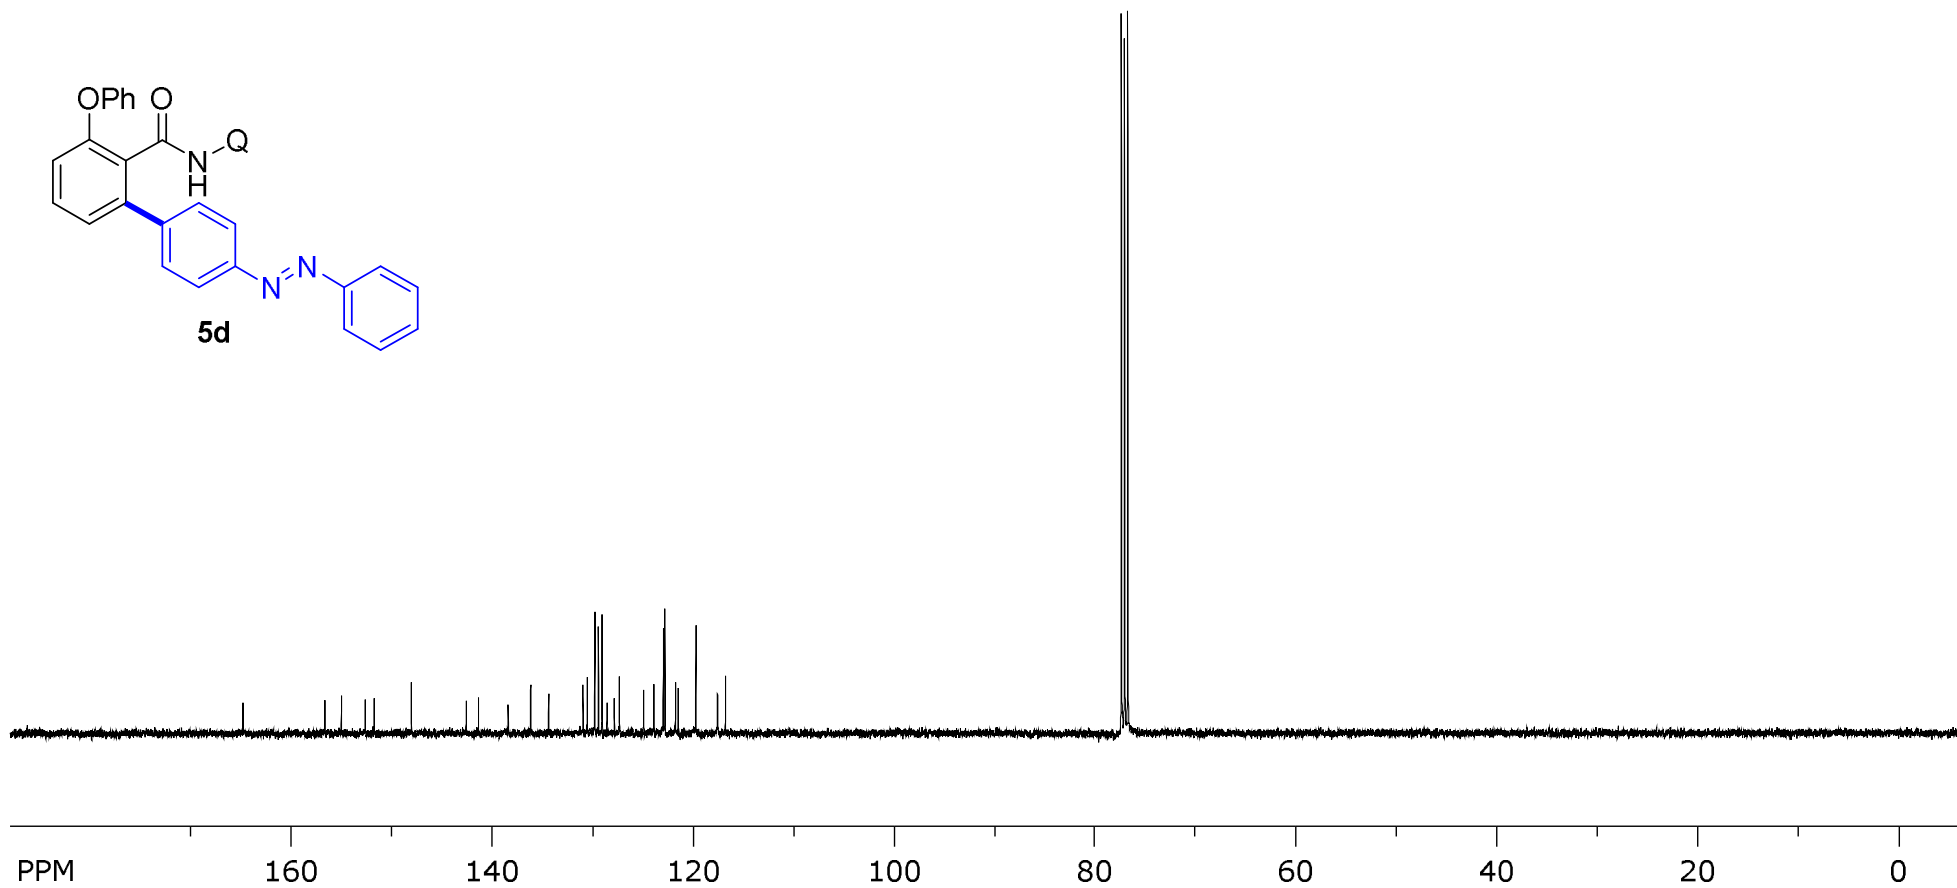



SpinWorks 4: SS 78 P REP  
C13CPD CDCl3 /opt/topspin3.5pl2/nmrdata nmrsu 49

164.831 —  
156.671 —  
155.050 —  
152.672 —  
151.774 —  
148.065 —  
142.608 —  
141.393 —  
138.426 —  
136.188 —  
134.407 —  
130.980 —  
130.550 —  
129.806 —  
129.445 —  
129.074 —  
128.595 —  
127.854 —  
127.356 —  
124.940 —  
123.922 —  
122.986 —  
122.819 —  
121.767 —  
121.505 —  
119.738 —  
117.583 —  
116.790 —

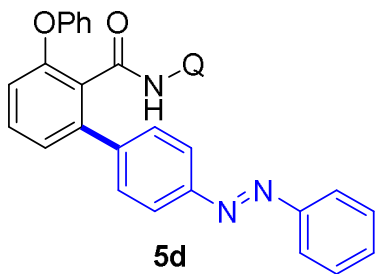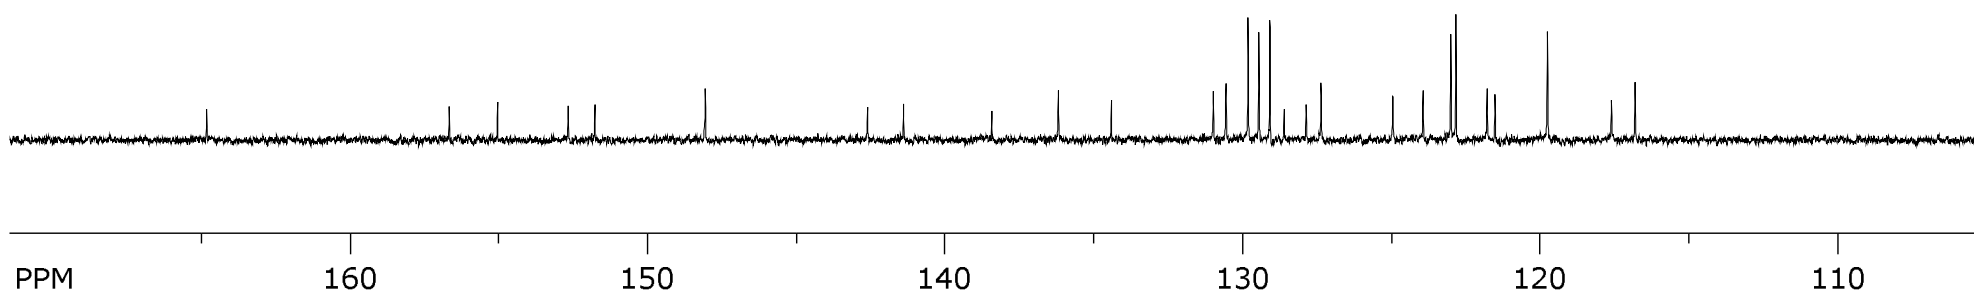

SpinWorks 4: SS-779  
PROTON\_32 CDCl3 /opt/topspin3.5pl2/nmrdata nmrsu 2

8.7001  
8.7040  
8.7105  
8.7144  
8.8190  
8.8235  
8.8368  
8.8413  
10.1387  
  
8.1889  
7.7234  
7.6918  
7.1920  
7.1874  
7.1596  
7.1406  
7.0960  
7.0754  
  
5.2672

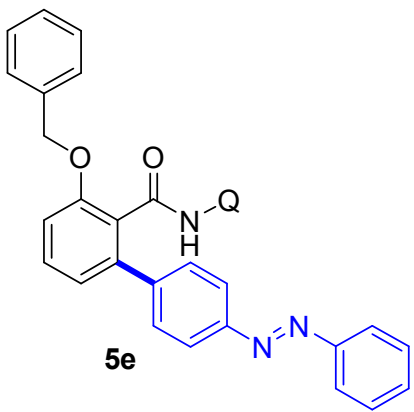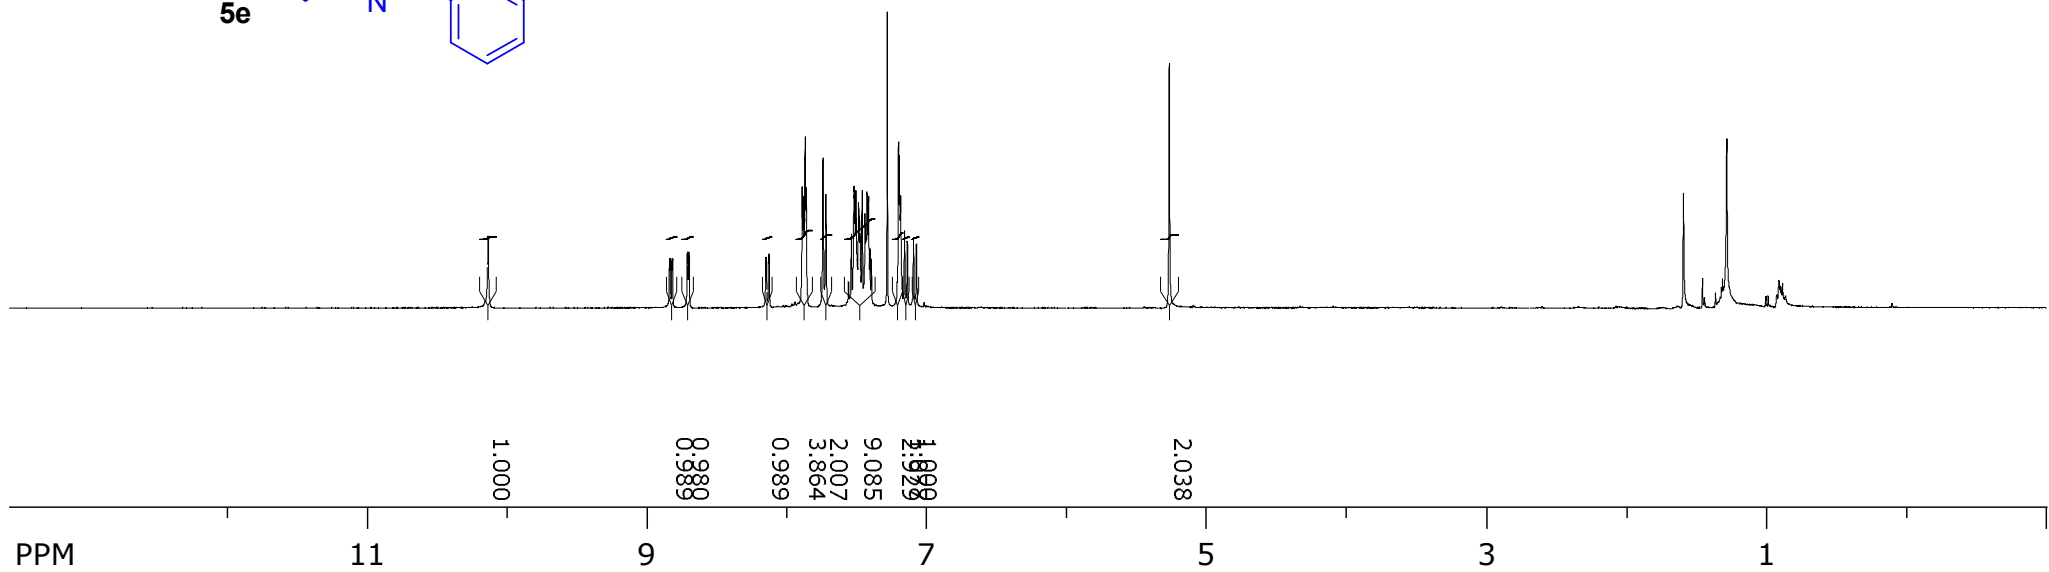

SpinWorks 4: SS-779  
PROTON\_32 CDCl3 /opt/topspin3.5pl2/nmrdata nmrsu 2

10.1387

8.7001  
8.7040  
8.7105  
8.7144  
8.8190  
8.8235  
8.8368  
8.8413

8.1282  
8.1320  
8.1489  
8.1527

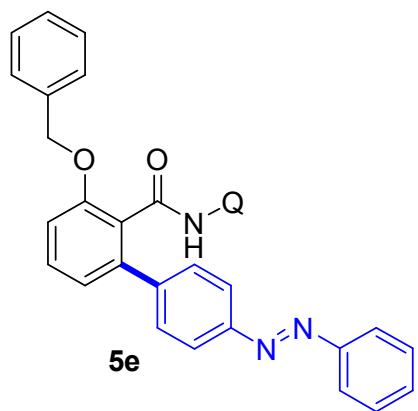

5e

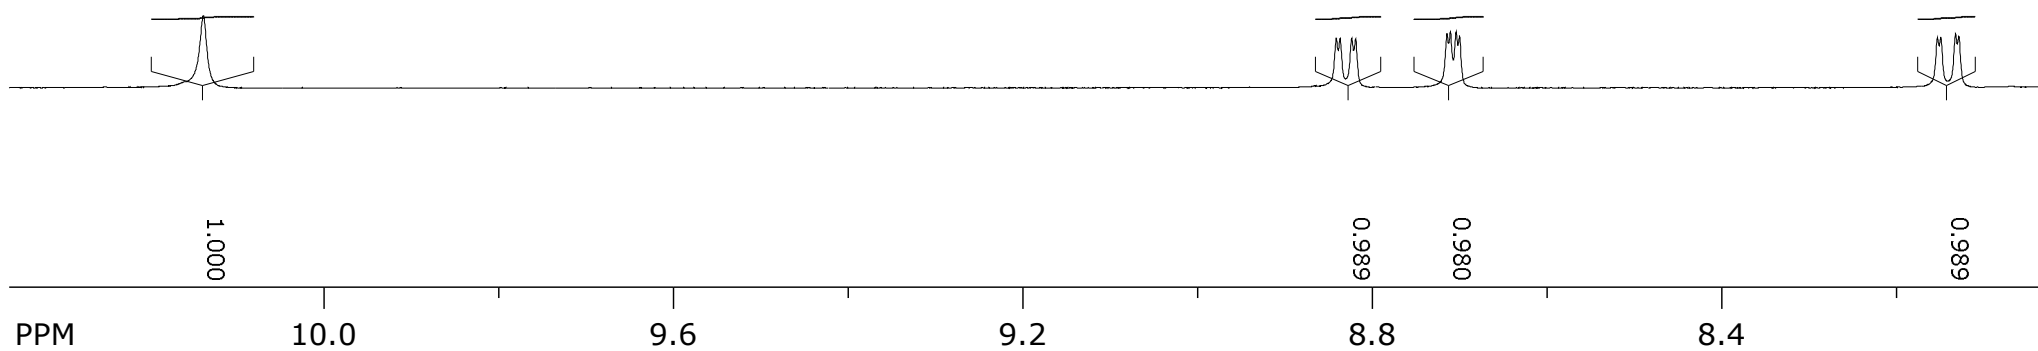

SpinWorks 4: SS-779  
PROTON\_32 CDCl3 /opt/topspin3.5pl2/nmrdata nmrsu 2

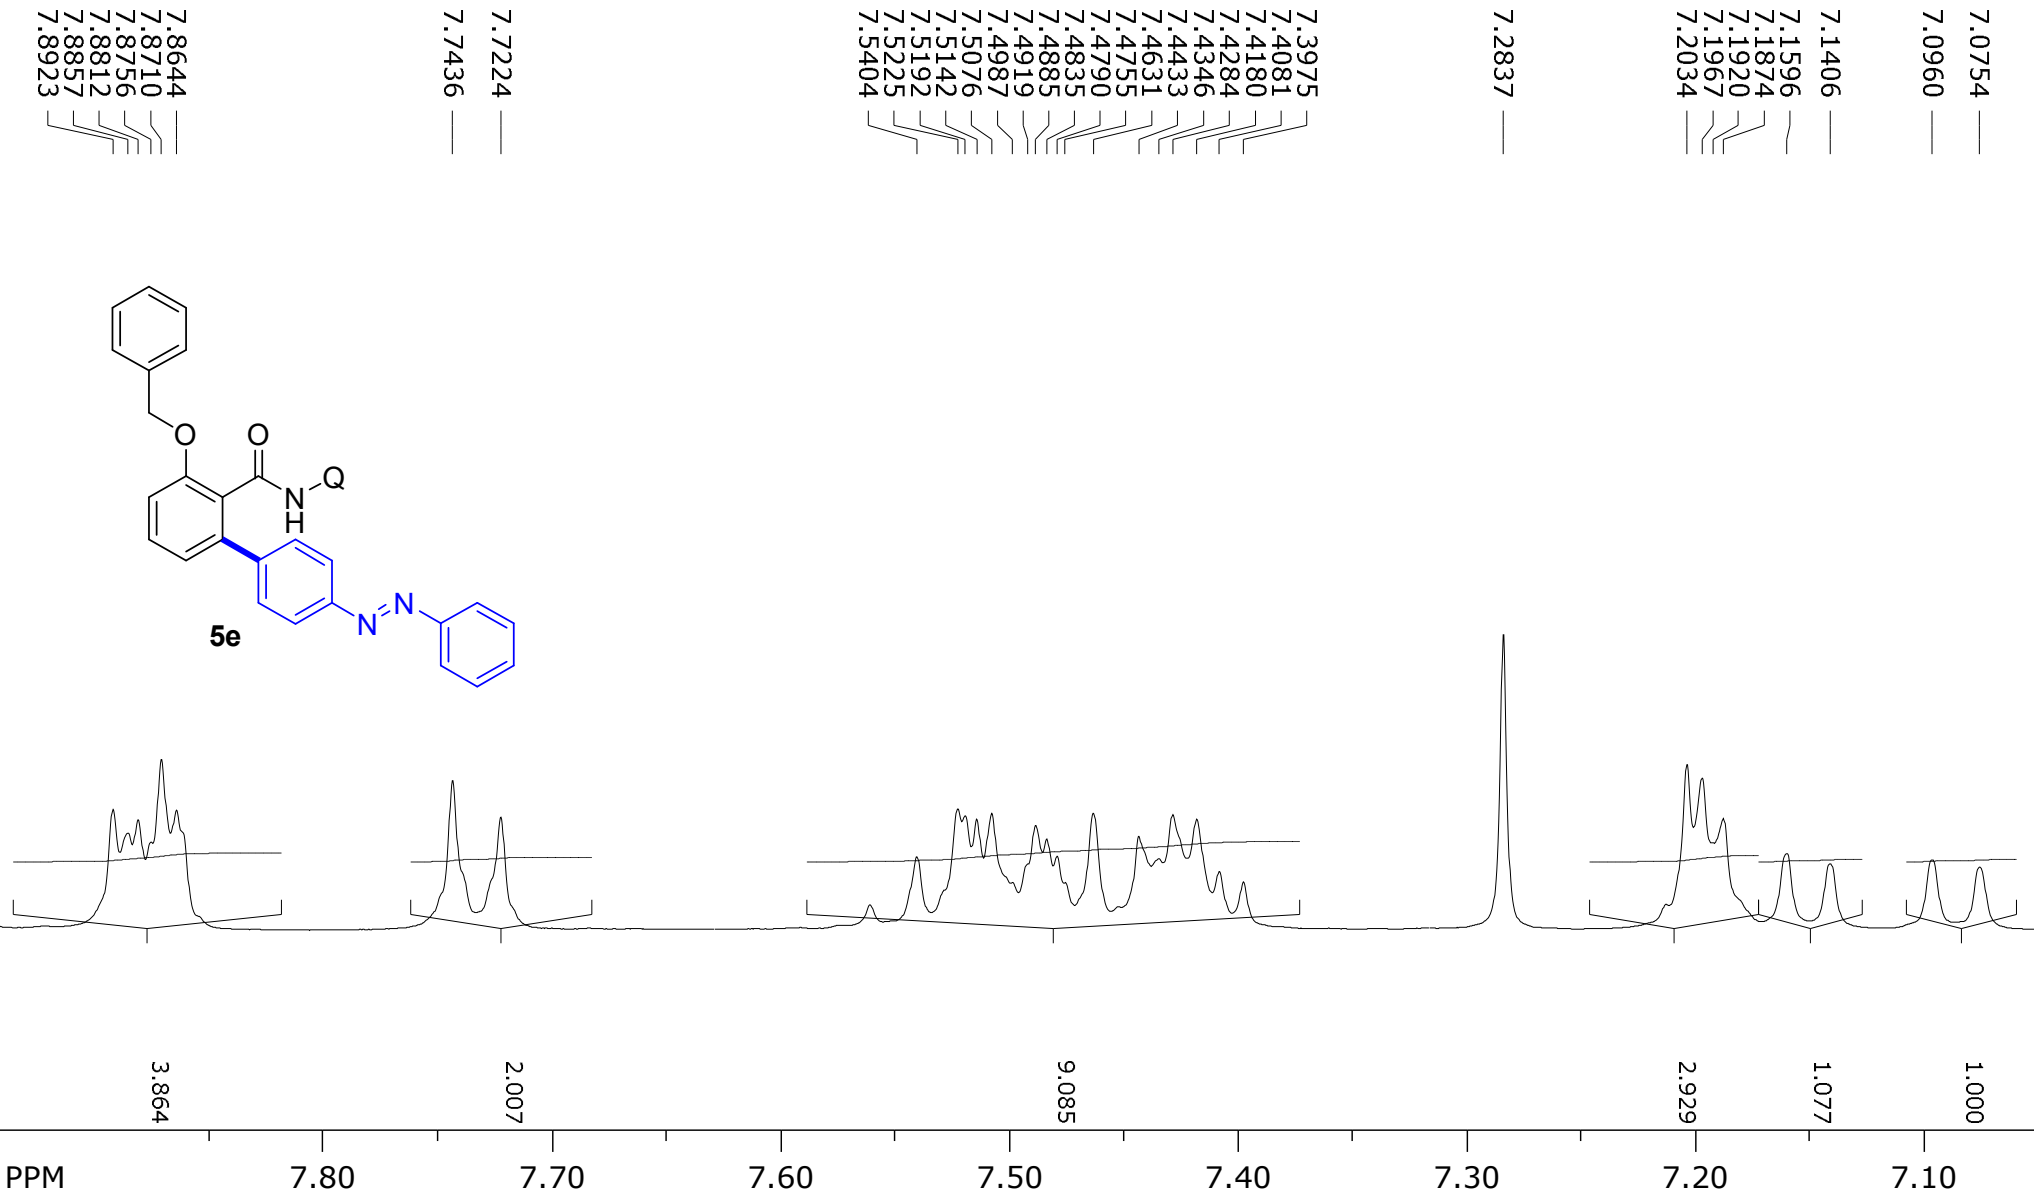

SpinWorks 4: SS-779  
PROTON\_32 CDCl3 /opt/topspin3.5pl2/nmrdata nmrsu 2



5.2672

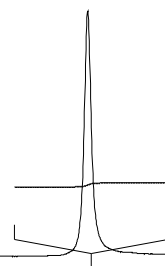

2.038

PPM 6.0 5.8 5.6 5.4 5.2 5.0 4.8 4.6

SpinWorks 4: SS 779  
C13CPD CDCl3 /opt/topspin3.5pl2/nmrdata nmrsu 1

112.288  
116.781  
121.480  
121.665  
122.805  
122.857  
126.890  
126.892  
130.921  
134.589  
136.219  
136.680  
138.433  
141.072  
142.966  
148.013  
151.693  
152.692  
155.756  
165.600

70.542  
76.732  
77.049  
77.367

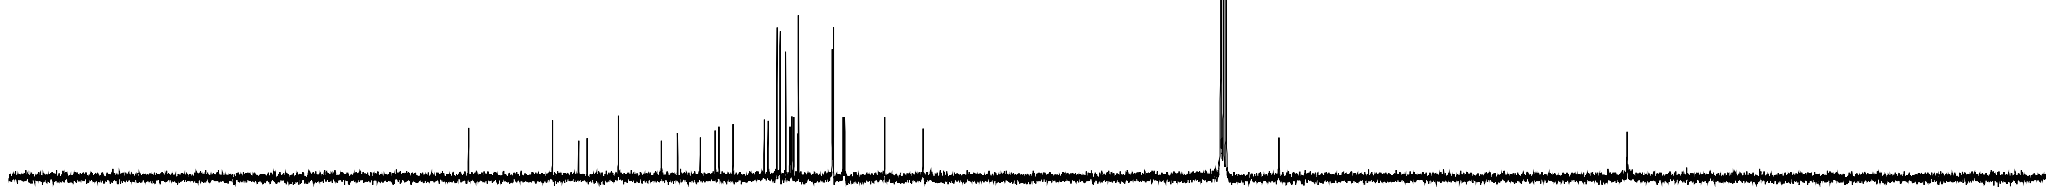

PPM 160 120 80 40 0

SpinWorks 4: SS 779  
C13CPD CDCl3 /opt/topspin3.5pl2/nmrdata nmrsu 1

165.600 —  
155.756 —  
151.693 —  
152.692 —  
148.013 —  
142.966 —  
141.072 —  
138.433 —  
136.680 —  
134.589 —  
130.921 —  
130.472 —  
129.428 —  
129.058 —  
128.388 —  
127.911 —  
127.680 —  
127.455 —  
126.971 —  
126.890 —  
122.928 —  
122.857 —  
122.805 —  
121.665 —  
121.480 —  
116.781 —  
112.288 —

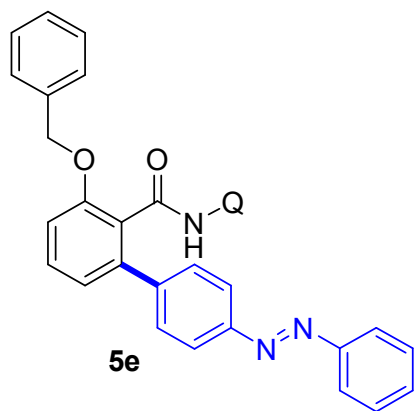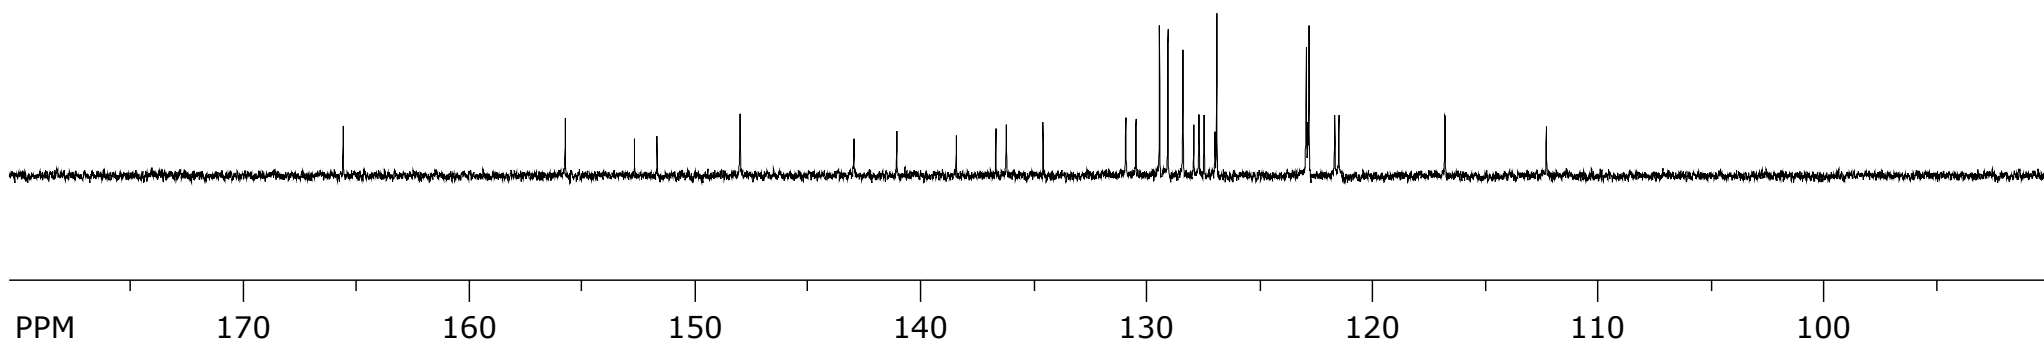

SpinWorks 4: SS-801  
PROTON CDCl3 /opt/topspin3.5pl2/nmrdata nmrsu 2

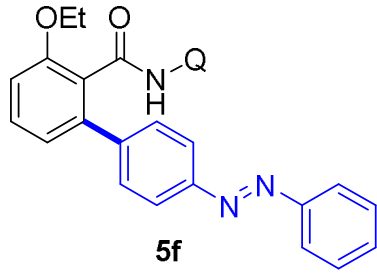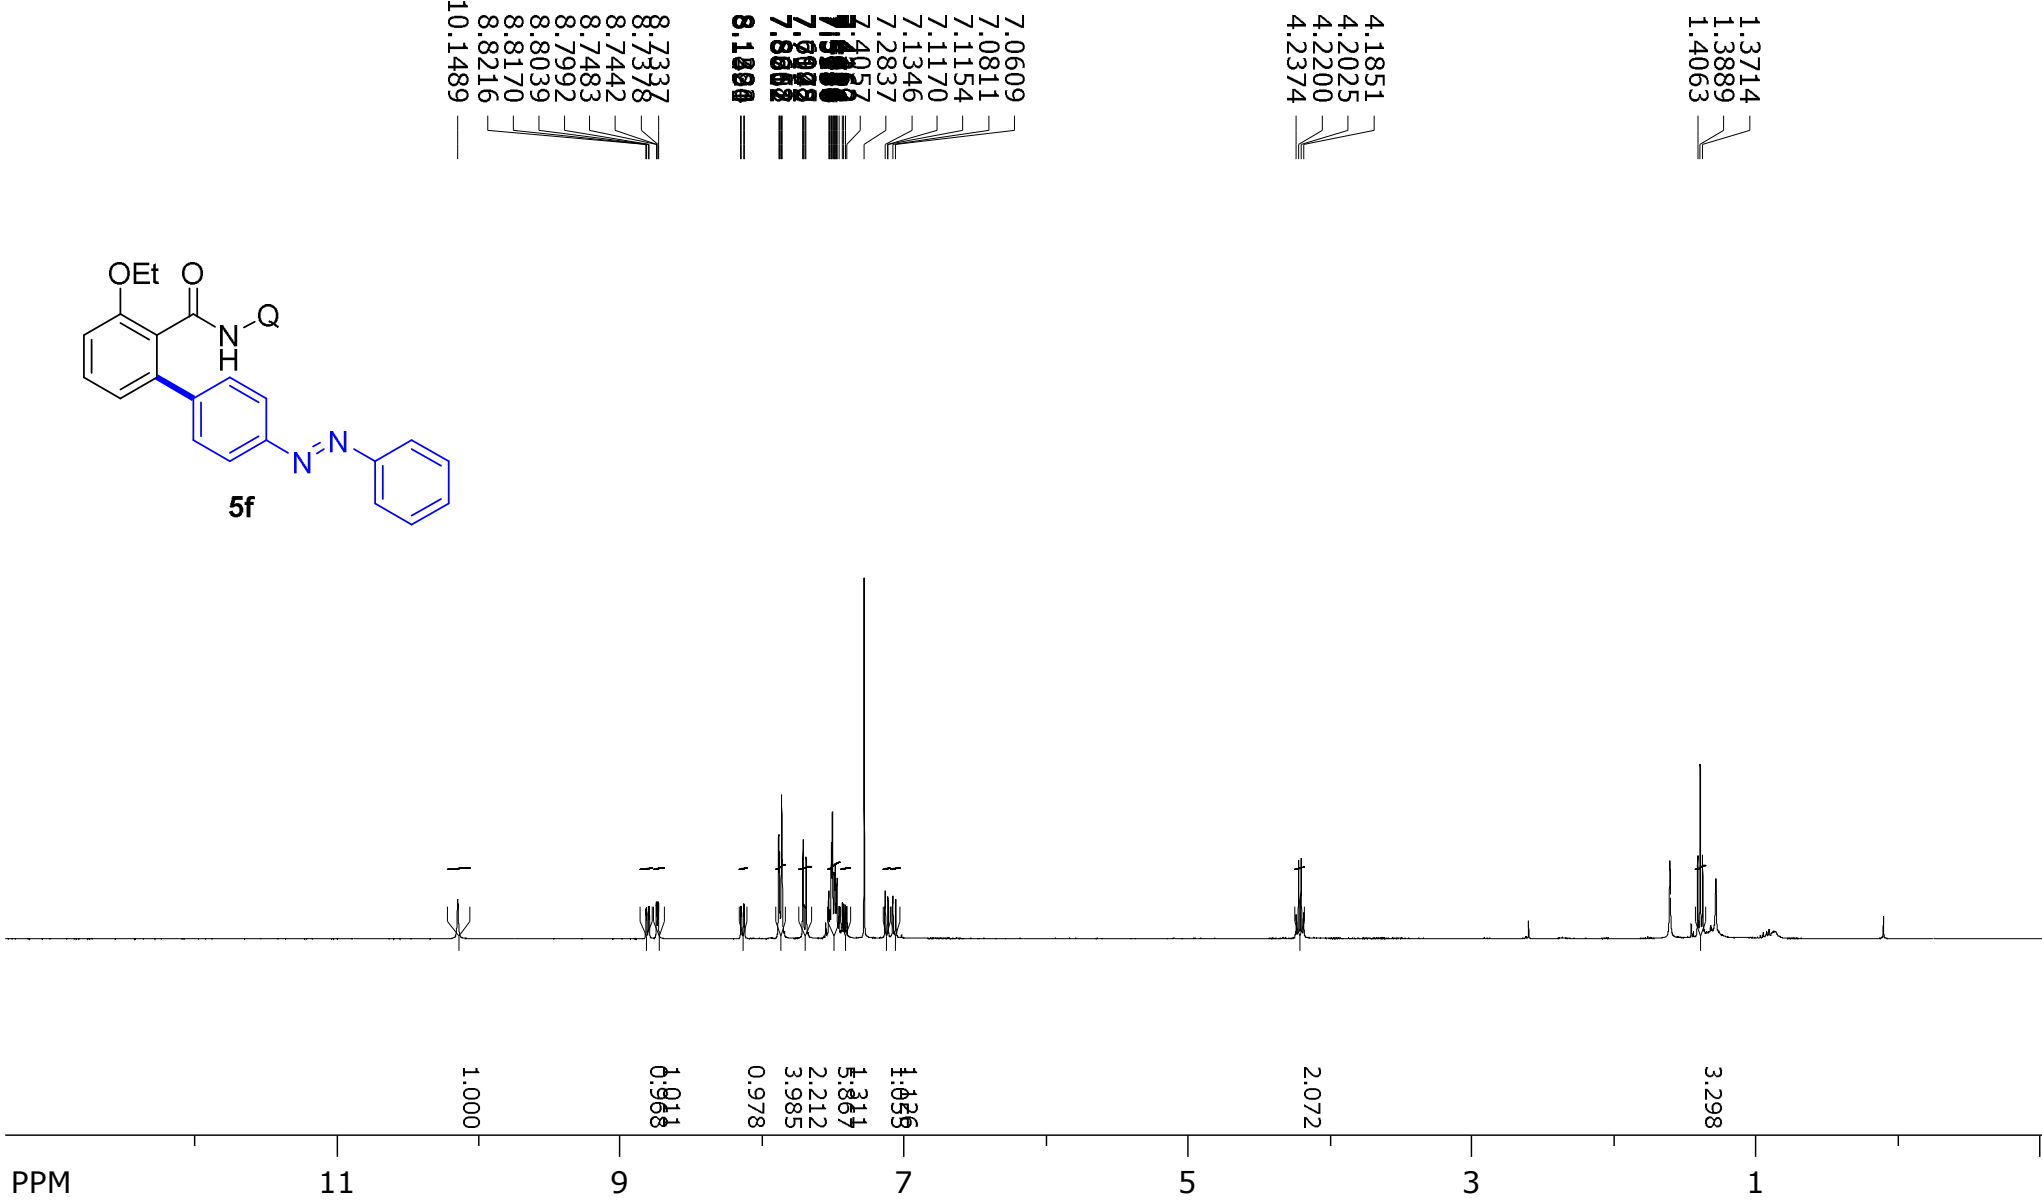



SpinWorks 4: SS-801  
PROTON CDCl3 /opt/topspin3.5pl2/nmrdata nmrsu 2

10.1489

8.7337  
8.7378  
8.7442  
8.7483  
8.7992  
8.8039  
8.8170  
8.8216

8.1283  
8.1324  
8.1490  
8.1531

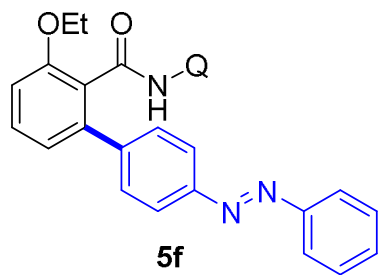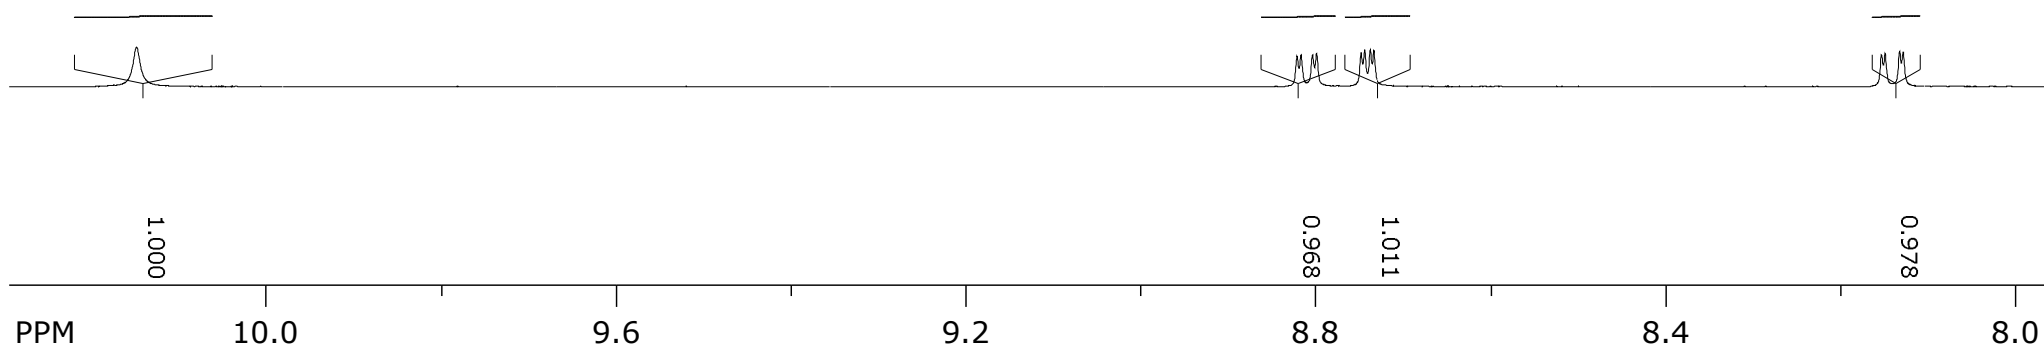

SpinWorks 4: SS-801  
PROTON CDCl3 /opt/topspin3.5pl2/nmrdata nmrsu 2

7.86608  
7.86552  
7.87572  
7.88112  
7.88661

7.69228  
7.69775  
7.7095  
7.7142  
7.7192

7.4057  
7.4162  
7.4263  
7.4369  
7.4604  
7.4751  
7.4774  
7.4816  
7.4882  
7.4923  
7.4946  
7.5013  
7.5074  
7.5132  
7.5154  
7.5235  
7.5286  
7.5336

7.2837

7.0609  
7.0811  
7.1154  
7.1346

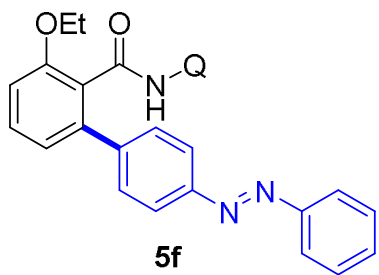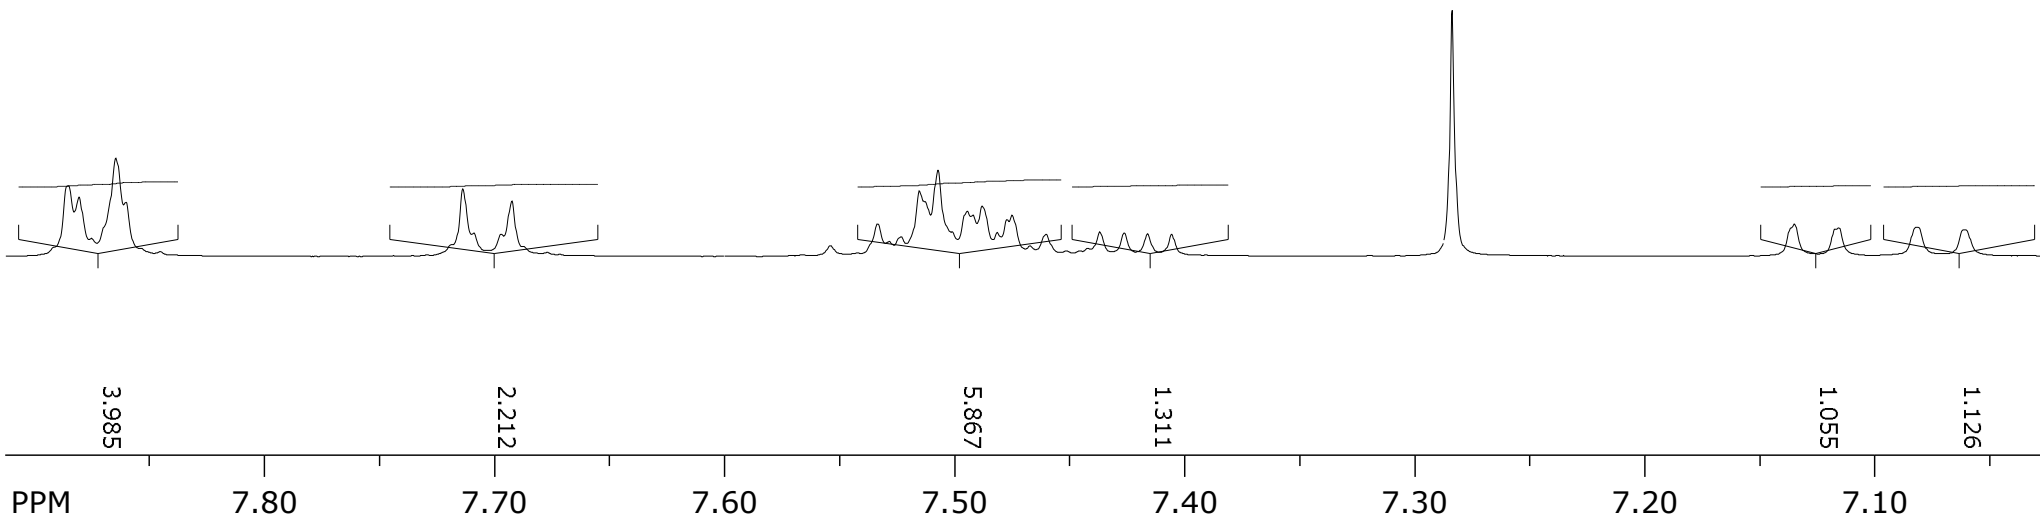

SpinWorks 4: SS-801  
PROTON CDCl3 /opt/topspin3.5pl2/nmrdata nmrsu 2

4.1851  
4.2025  
4.2200  
4.2374

1.3714  
1.3889  
1.4063

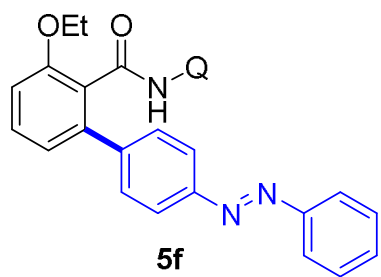

5f

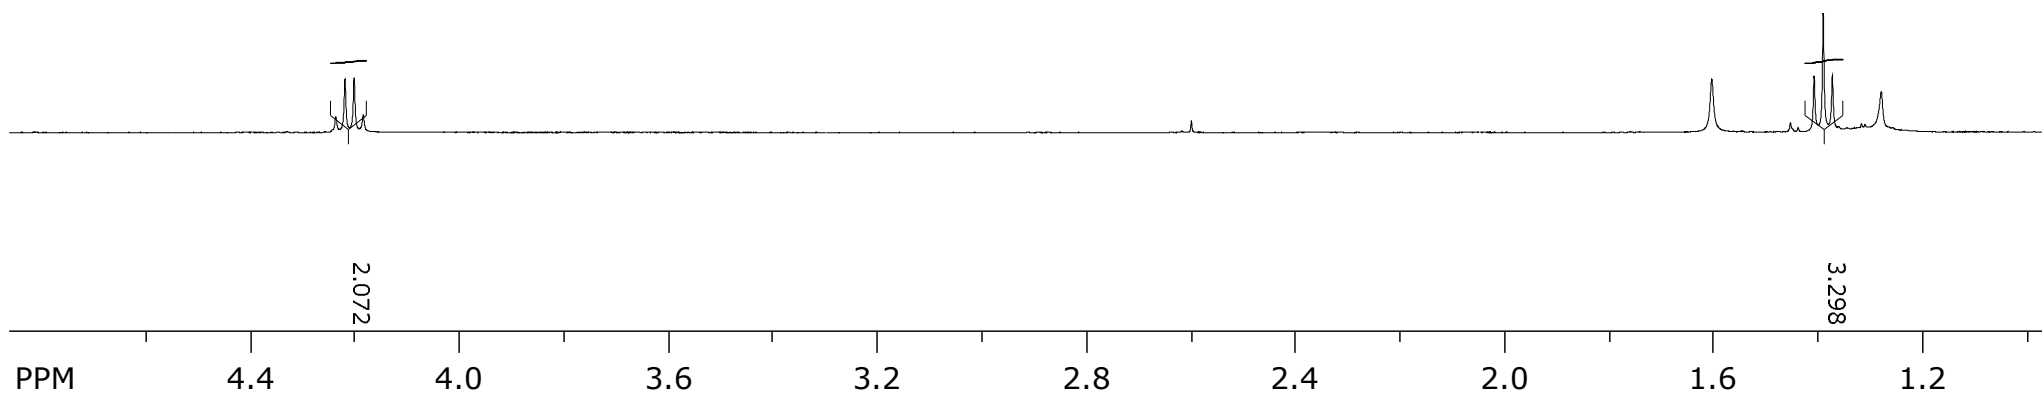

SpinWorks 4: SS-801  
C13CPD256 CDCl3 /opt/topspin3.5pl2/nmrdata nmrsu 33

111.673  
116.741  
121.485  
121.546  
122.517  
122.789  
122.889  
126.520  
127.420  
129.048  
129.368  
130.513  
130.875  
134.717  
136.215  
138.522  
141.264  
143.342  
148.014  
151.628  
152.712  
156.196  
165.619

64.628  
76.733  
77.051  
77.369

14.696

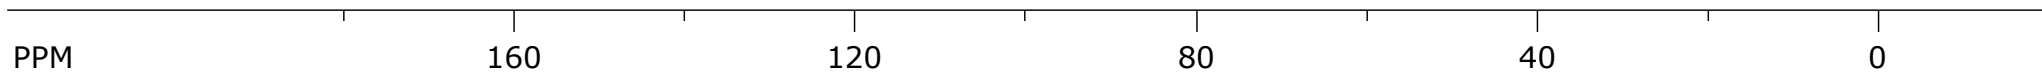

SpinWorks 4: SS-801  
C13CPD256 CDCl3 /opt/topspin3.5pl2/nmrdata nmrsu 33

165.619 —  
156.196 —  
151.628 —  
152.712 —  
148.014 —  
143.342 —  
141.264 —  
138.522 —  
136.215 —  
134.717 —  
130.875 —  
130.513 —  
129.368 —  
129.043 —  
127.940 —  
126.520 —  
122.889 —  
122.789 —  
121.517 —  
121.485 —  
121.546 —  
116.741 —  
111.673 —

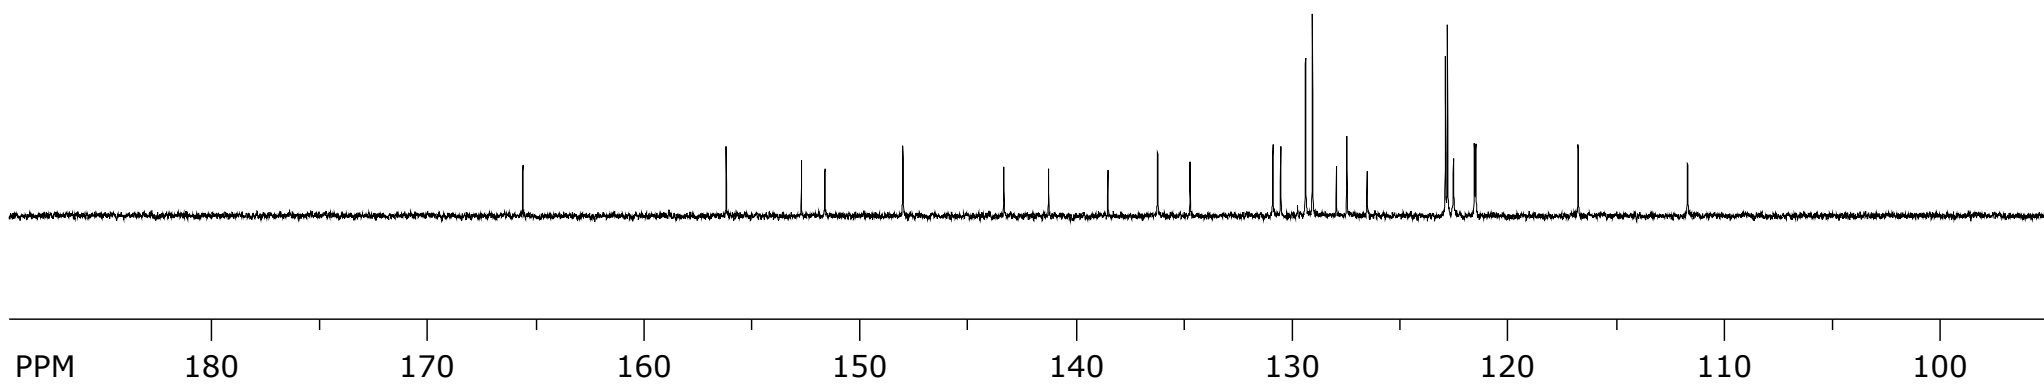

SpinWorks 4: SS 796  
PROTON CDCl3 /opt/topspin3.5pl2/nmrdata nmrsu 1

8.5436  
8.5576  
8.5576  
8.5661  
8.5888  
8.5930  
8.5994  
8.6035  
9.7031  
8.0648  
7.9988  
7.9988  
7.9988  
7.9988  
7.9988  
7.9988  
7.9988  
7.9988  
7.9988  
7.9988  
7.2062  
7.2090  
7.2032  
7.1877  
7.1722  
7.1697  
7.1667

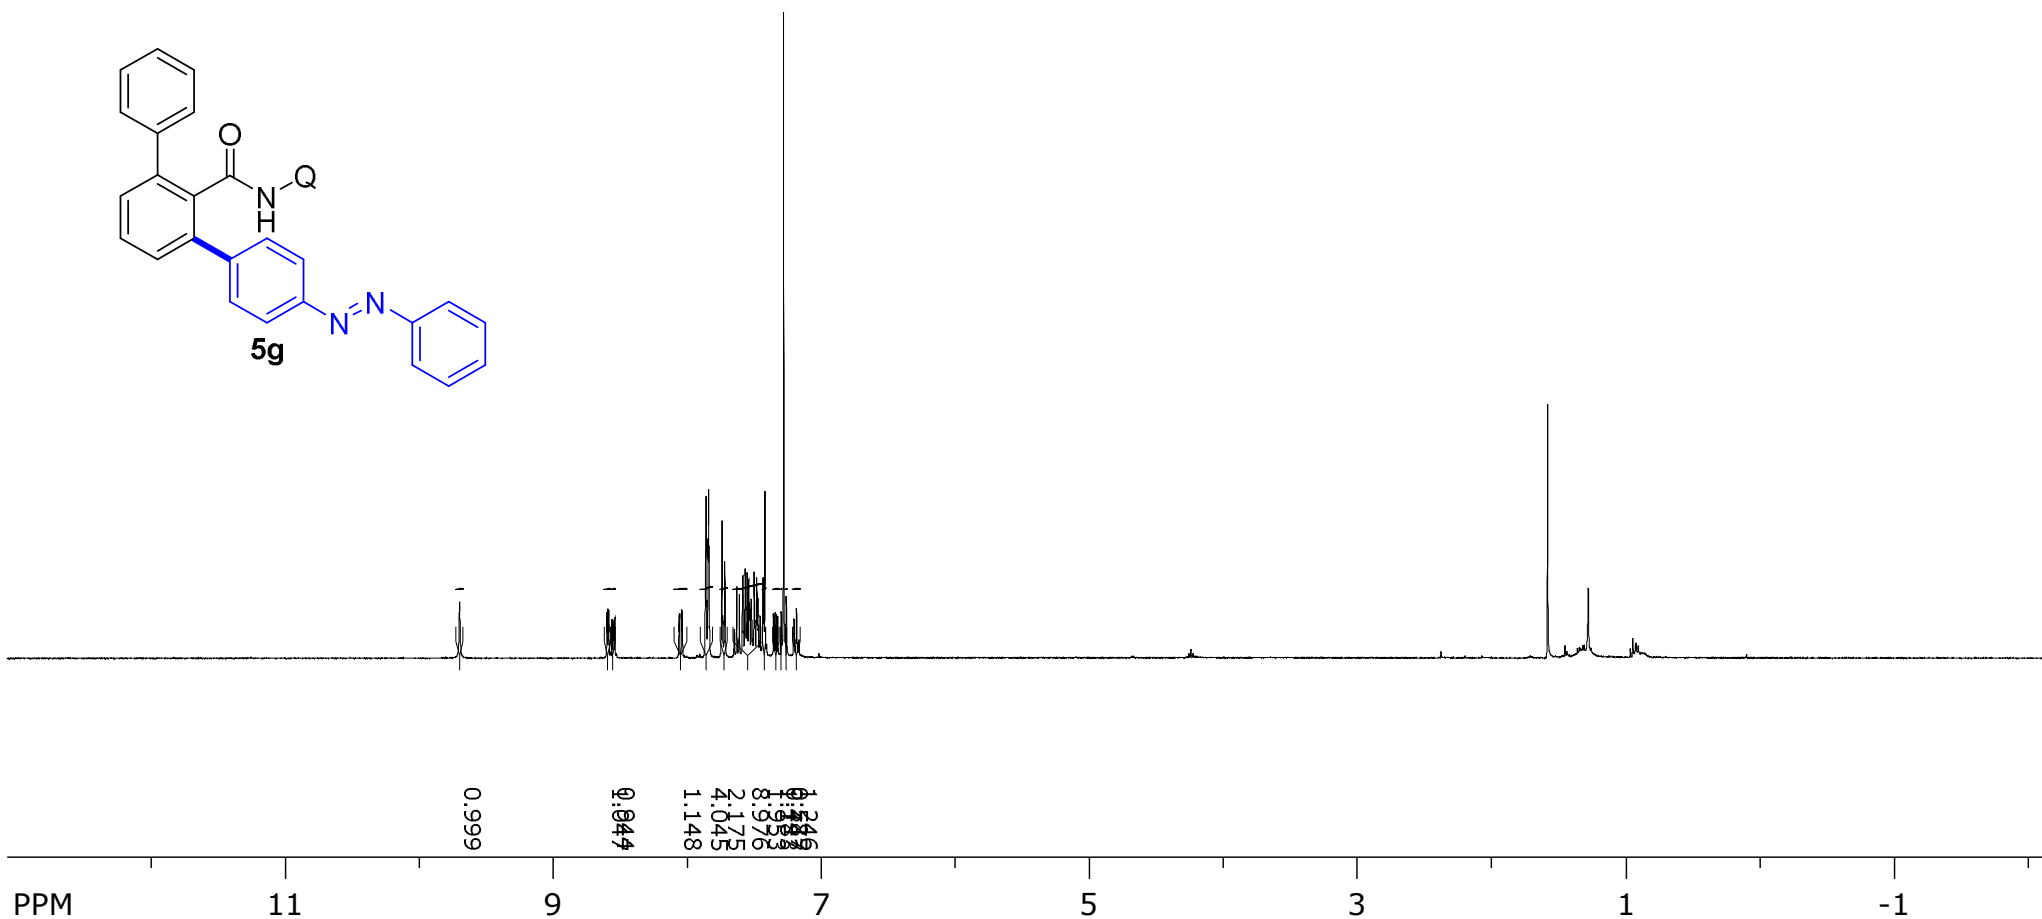

SpinWorks 4: SS 796  
PROTON CDCl3 /opt/topspin3.5pl2/nmrdata nmrsu 1

9.7031

8.5436  
8.5521  
8.5576  
8.5661  
8.5888  
8.5930  
8.5994  
8.6035

8.0400  
8.0441  
8.0607  
8.0648

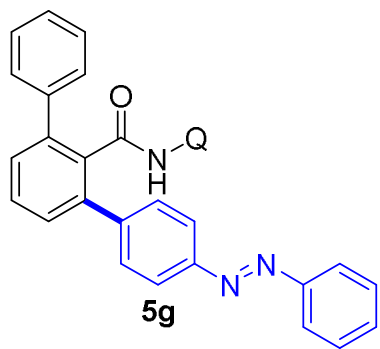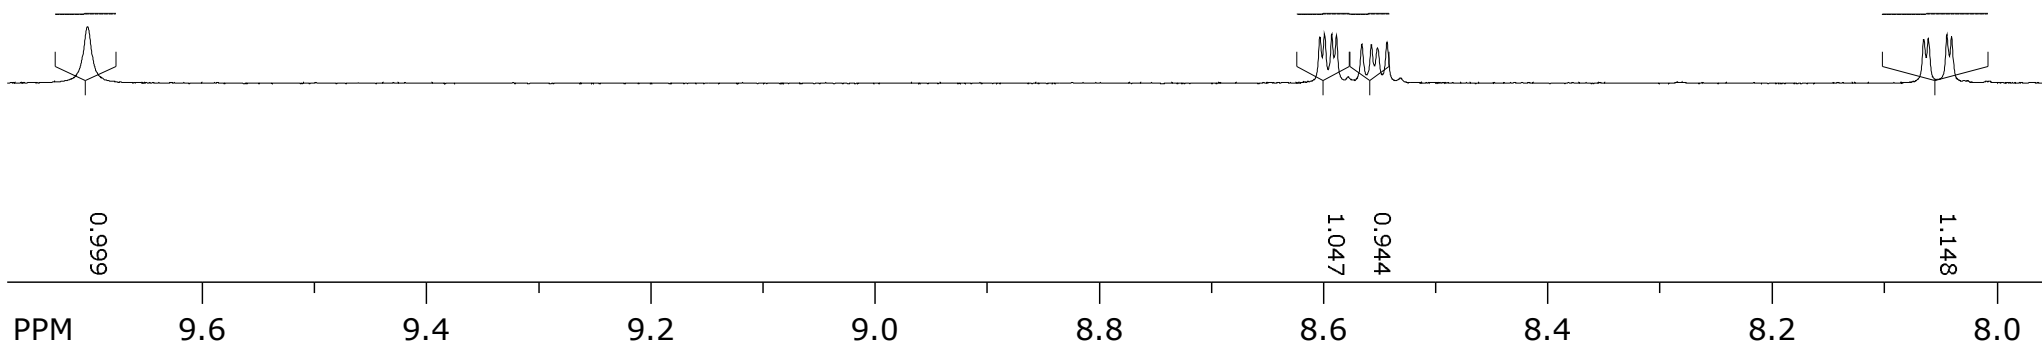

SpinWorks 4: SS 796  
PROTON CDCl3 /opt/topspin3.5pl2/nmrdata nmrsu 1

7.8375  
7.8430  
7.8476  
7.8516  
7.8593  
7.8641  
7.8686

7.7230  
7.7277  
7.7395  
7.7444

7.6532  
7.6340  
7.6150

7.5836  
7.5884  
7.5918  
7.5708  
7.5583  
7.5551  
7.5452  
7.5420  
7.5390  
7.5357  
7.5264  
7.5234

7.5036  
7.4973  
7.4885  
7.4769  
7.4730  
7.4595

7.4240  
7.4325  
7.4381

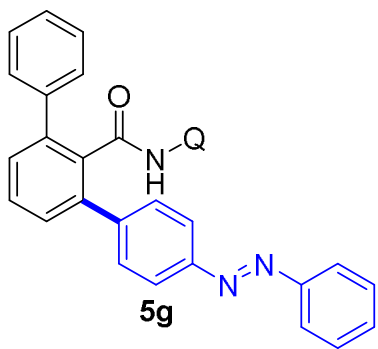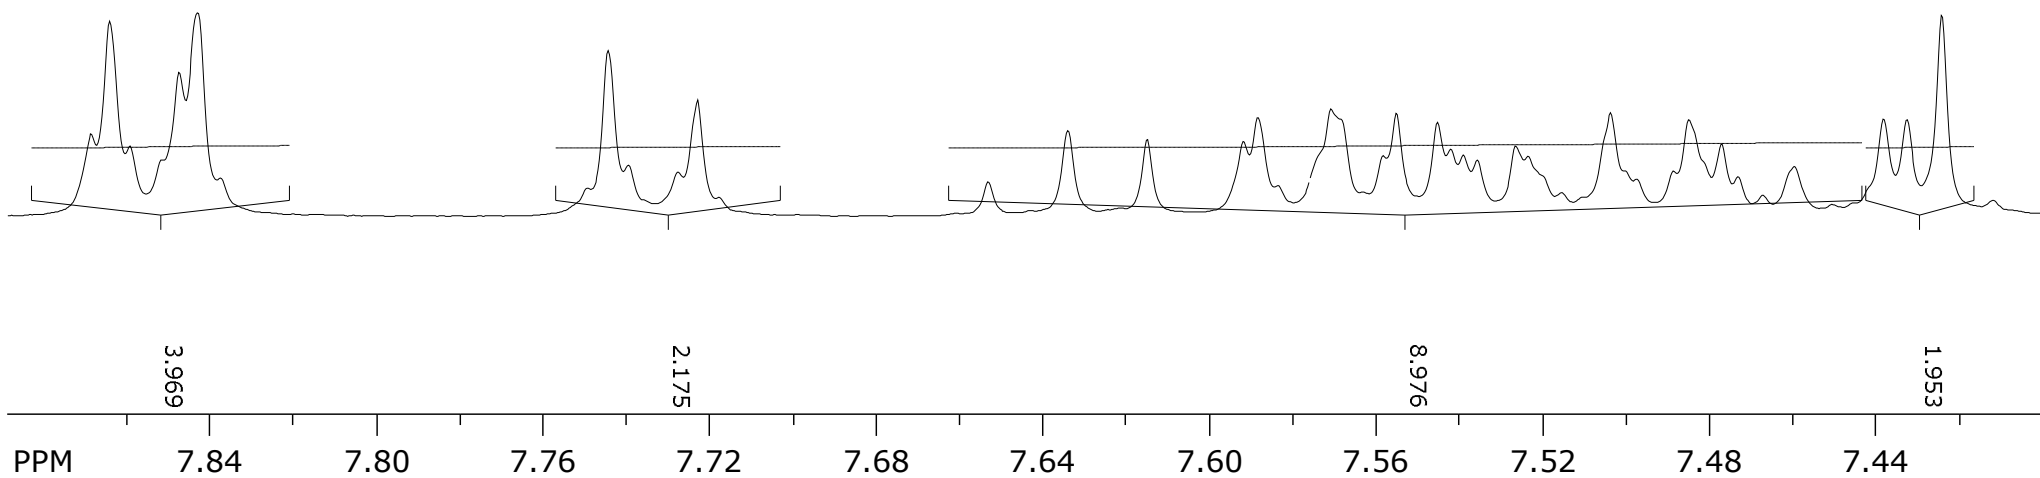



SpinWorks 4: SS 796  
PROTON CDCl3 /opt/topspin3.5pl2/nmrdata nmrsu 1

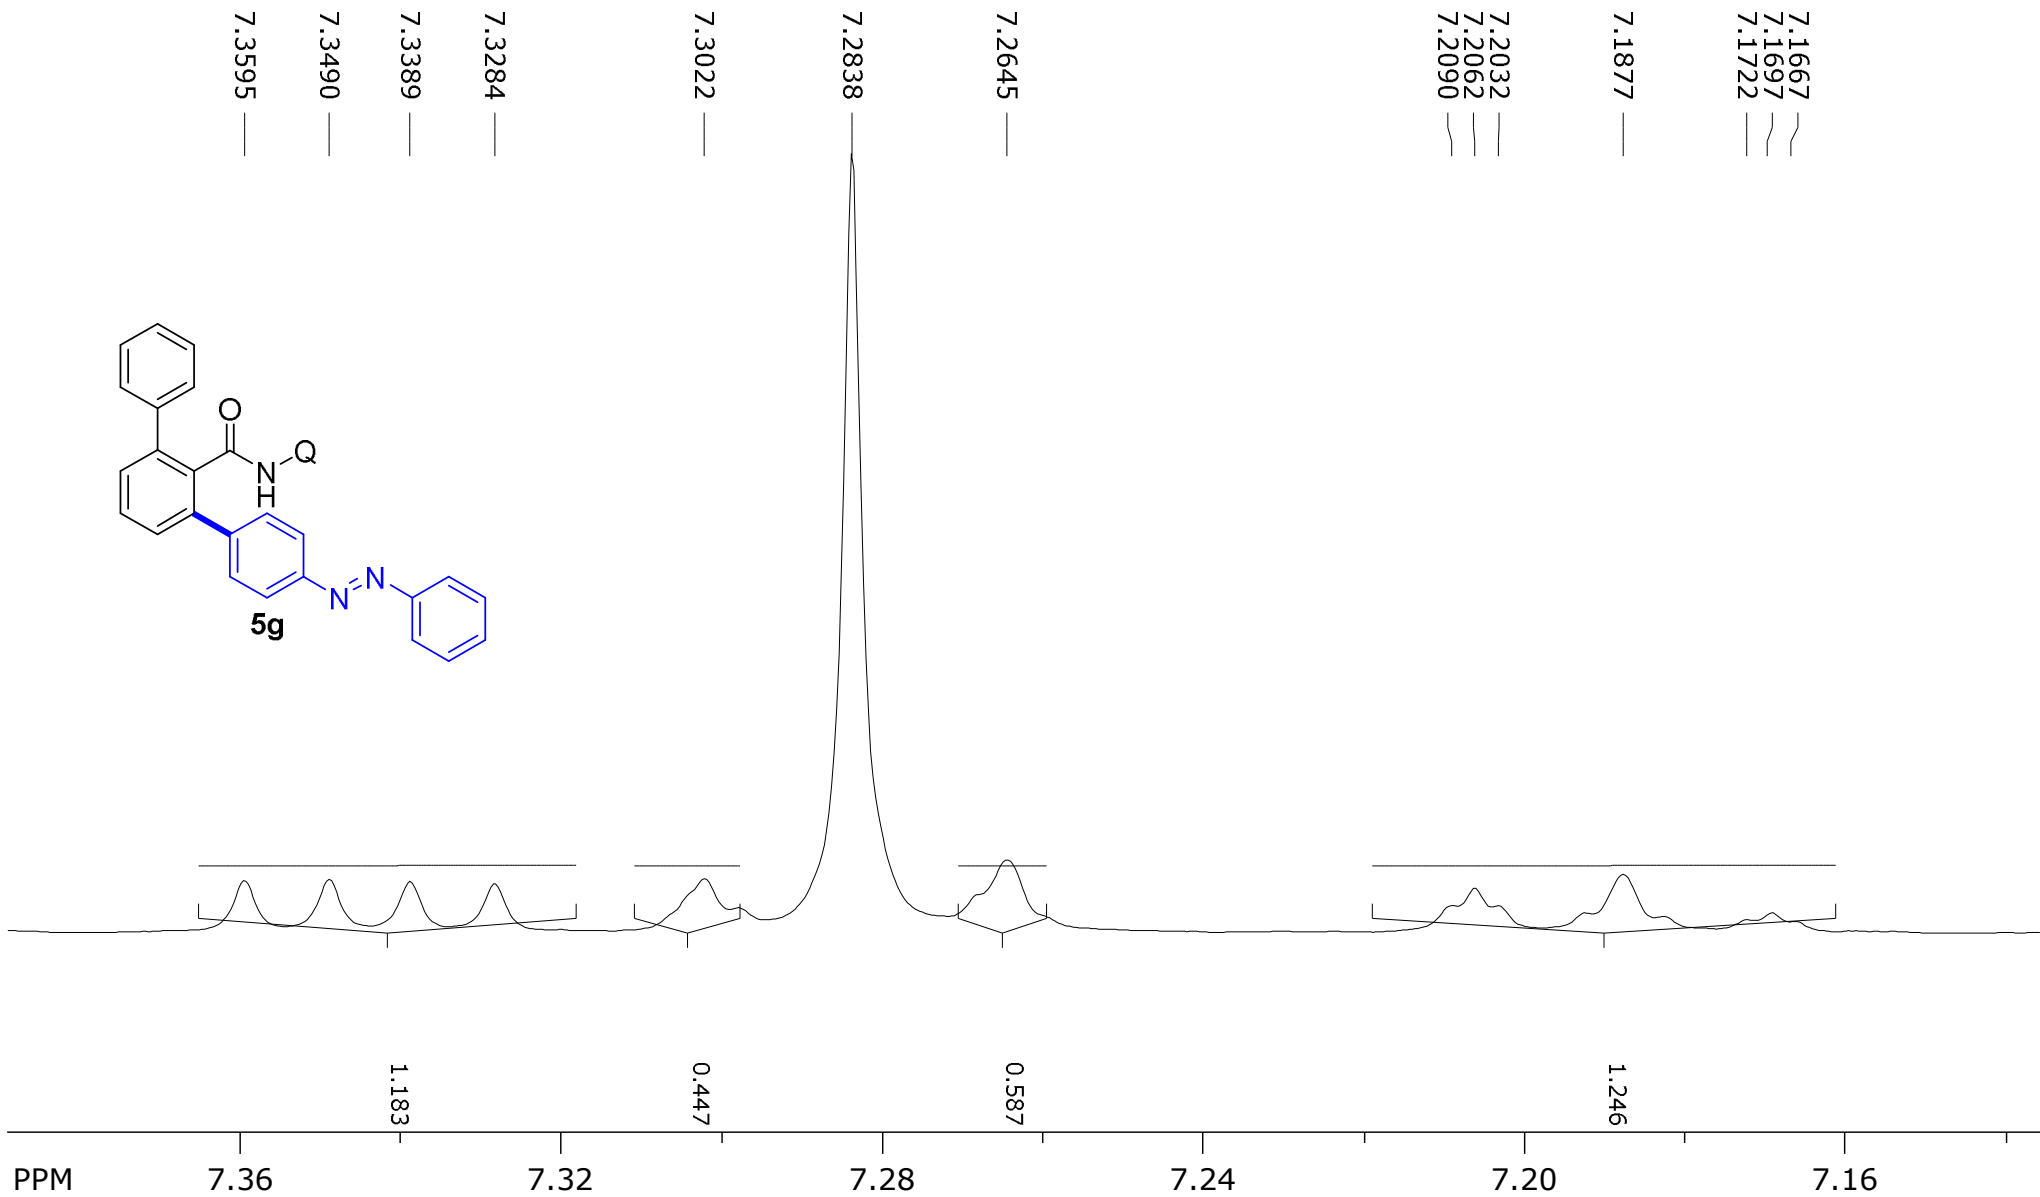

SpinWorks 4: SS-796

C13CPD256 CDCl3 /opt/topspin3.5pl2/nmrdata nmrsu 19

116.519  
121.402  
121.658  
122.795  
122.896  
127.214  
127.493  
127.684  
127.684  
127.684  
127.684  
134.170  
136.031  
136.141  
138.304  
139.718  
140.224  
140.754  
143.276  
147.916  
151.660  
152.662  
167.296

76.753  
77.071  
77.389

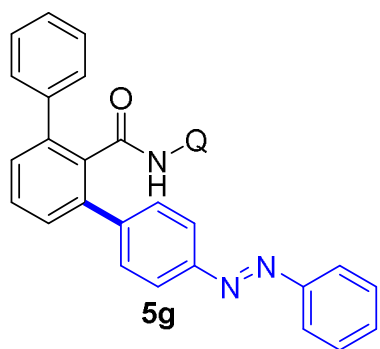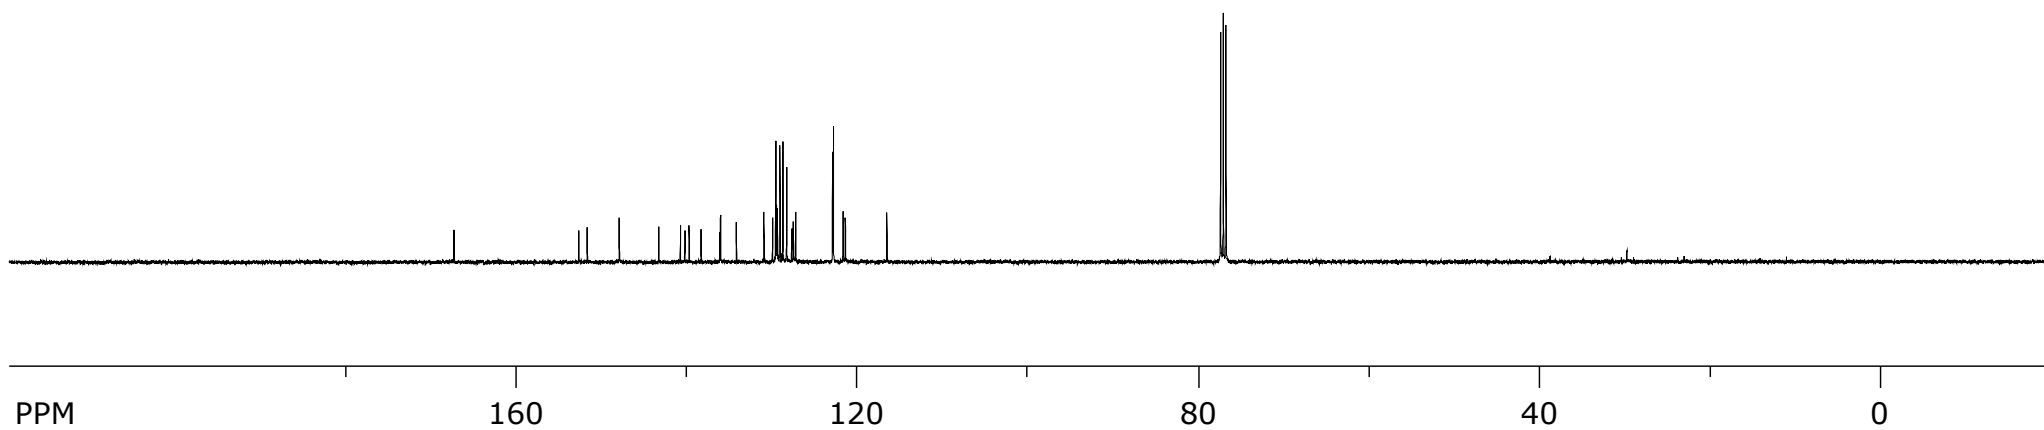

SpinWorks 4: SS-796  
C13CPD256 CDCl3 /opt/topspin3.5pl2/nmrdata nmrsu 19

167.296 —  
151.660 —  
152.662 —  
147.916 —  
143.276 —  
139.718 —  
140.224 —  
140.754 —  
138.304 —  
136.031 —  
136.141 —  
134.170 —  
130.939 —  
129.929 —  
129.566 —  
129.364 —  
129.061 —  
128.717 —  
128.273 —  
128.684 —  
127.493 —  
127.214 —  
121.402 —  
121.658 —  
122.795 —  
122.896 —  
116.519 —

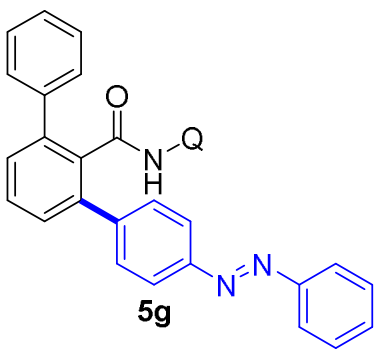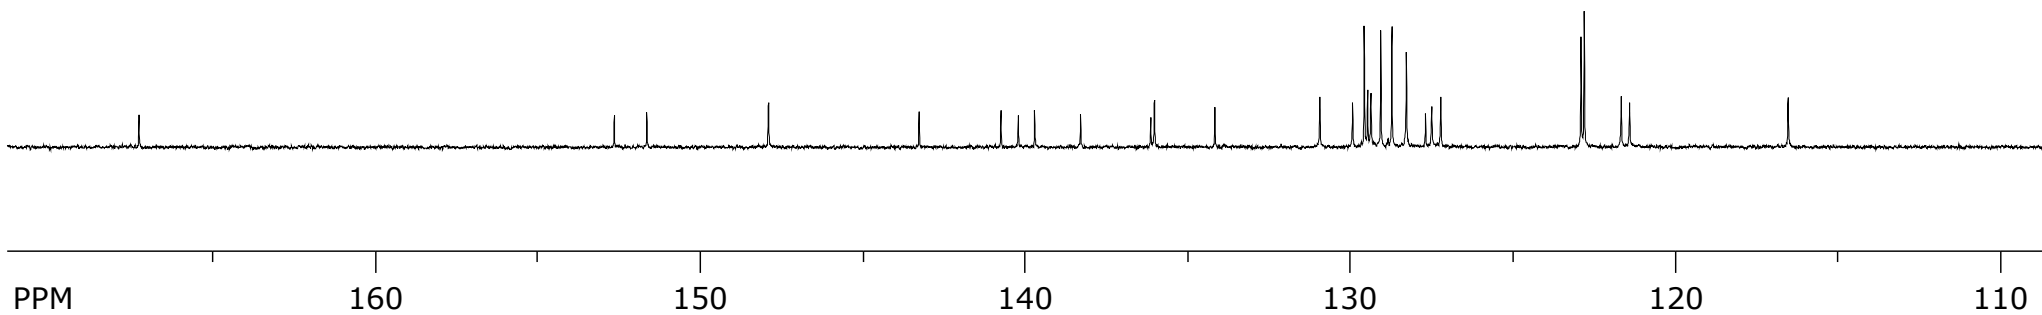

SpinWorks 4: SS 797  
PROTON CDCl3 /opt/topspin3.5pl2/nmrdata nmrsu 2

8.5696  
8.5790  
8.5855  
8.5917  
8.5959  
8.6023  
8.6064  
9.7070  
8.0608  
7.9808  
7.9608  
7.9408  
7.9208  
7.3585  
7.3480  
7.3379  
7.3273  
7.2837  
7.1053  
7.0856

2.2392

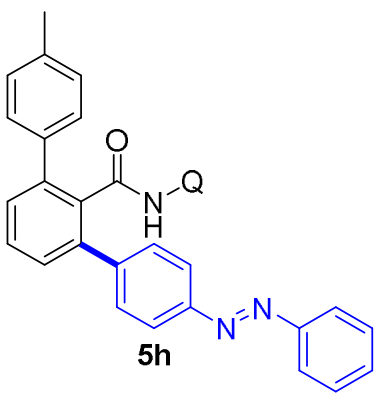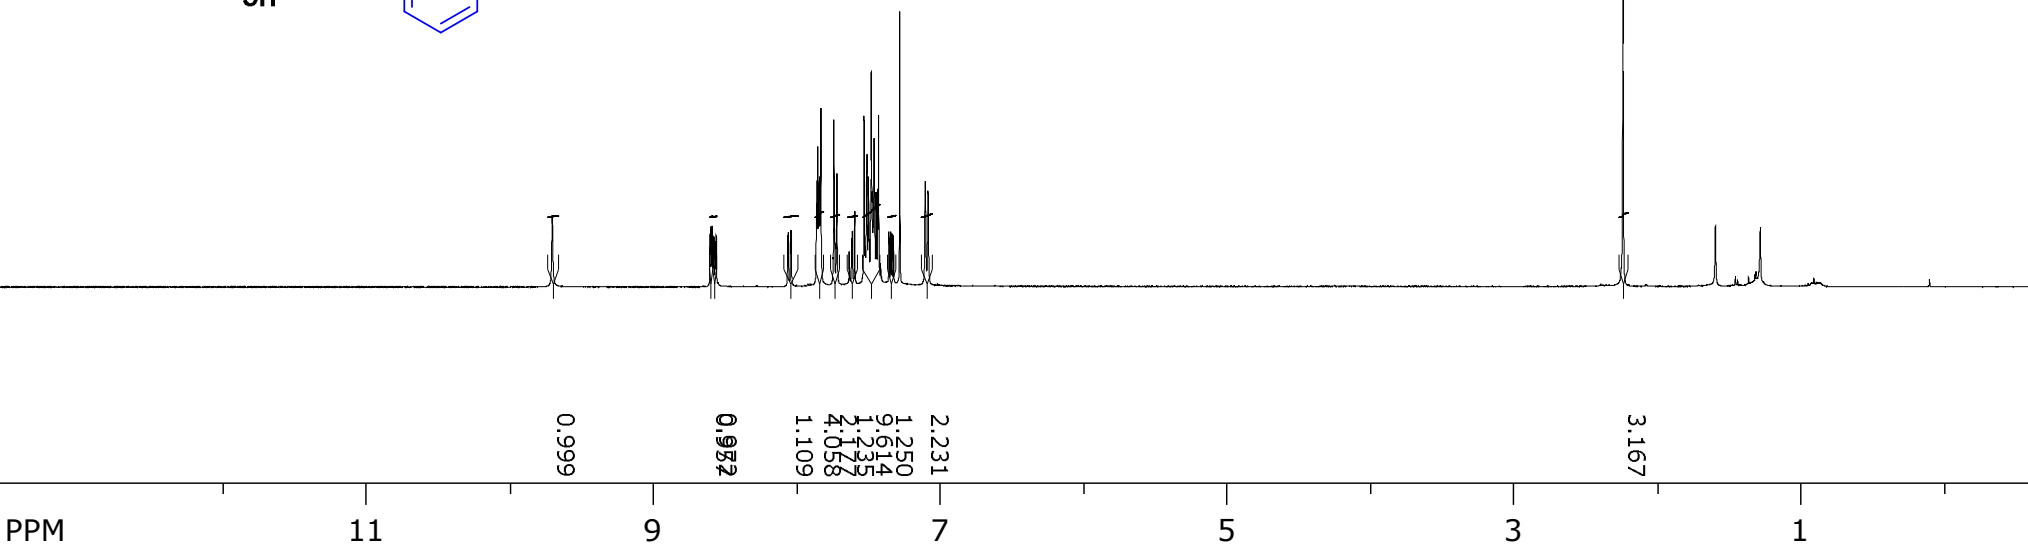

SpinWorks 4: SS 797  
PROTON CDCl3 /opt/topspin3.5pl2/nmrdata nmrsu 2

9.7070

8.5631  
8.5696  
8.5790  
8.5855  
8.5917  
8.5959  
8.6023  
8.6064

8.0400  
8.0442  
8.0607  
8.0648

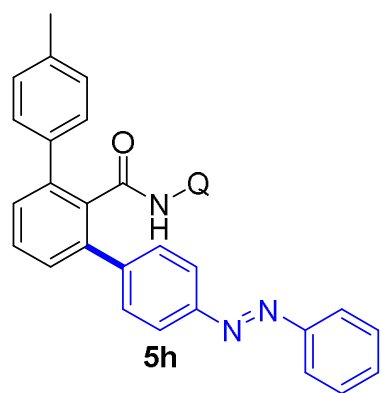

5h

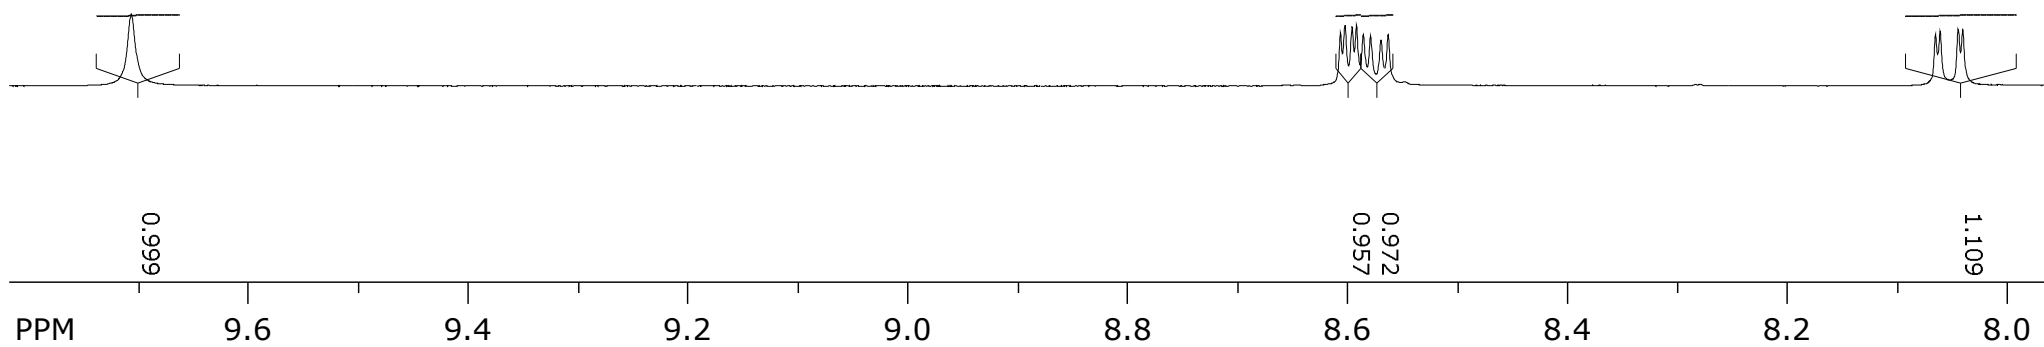

SpinWorks 4: SS 797  
PROTON CDCl3 /opt/topspin3.5pl2/nmrdata nmrsu 2

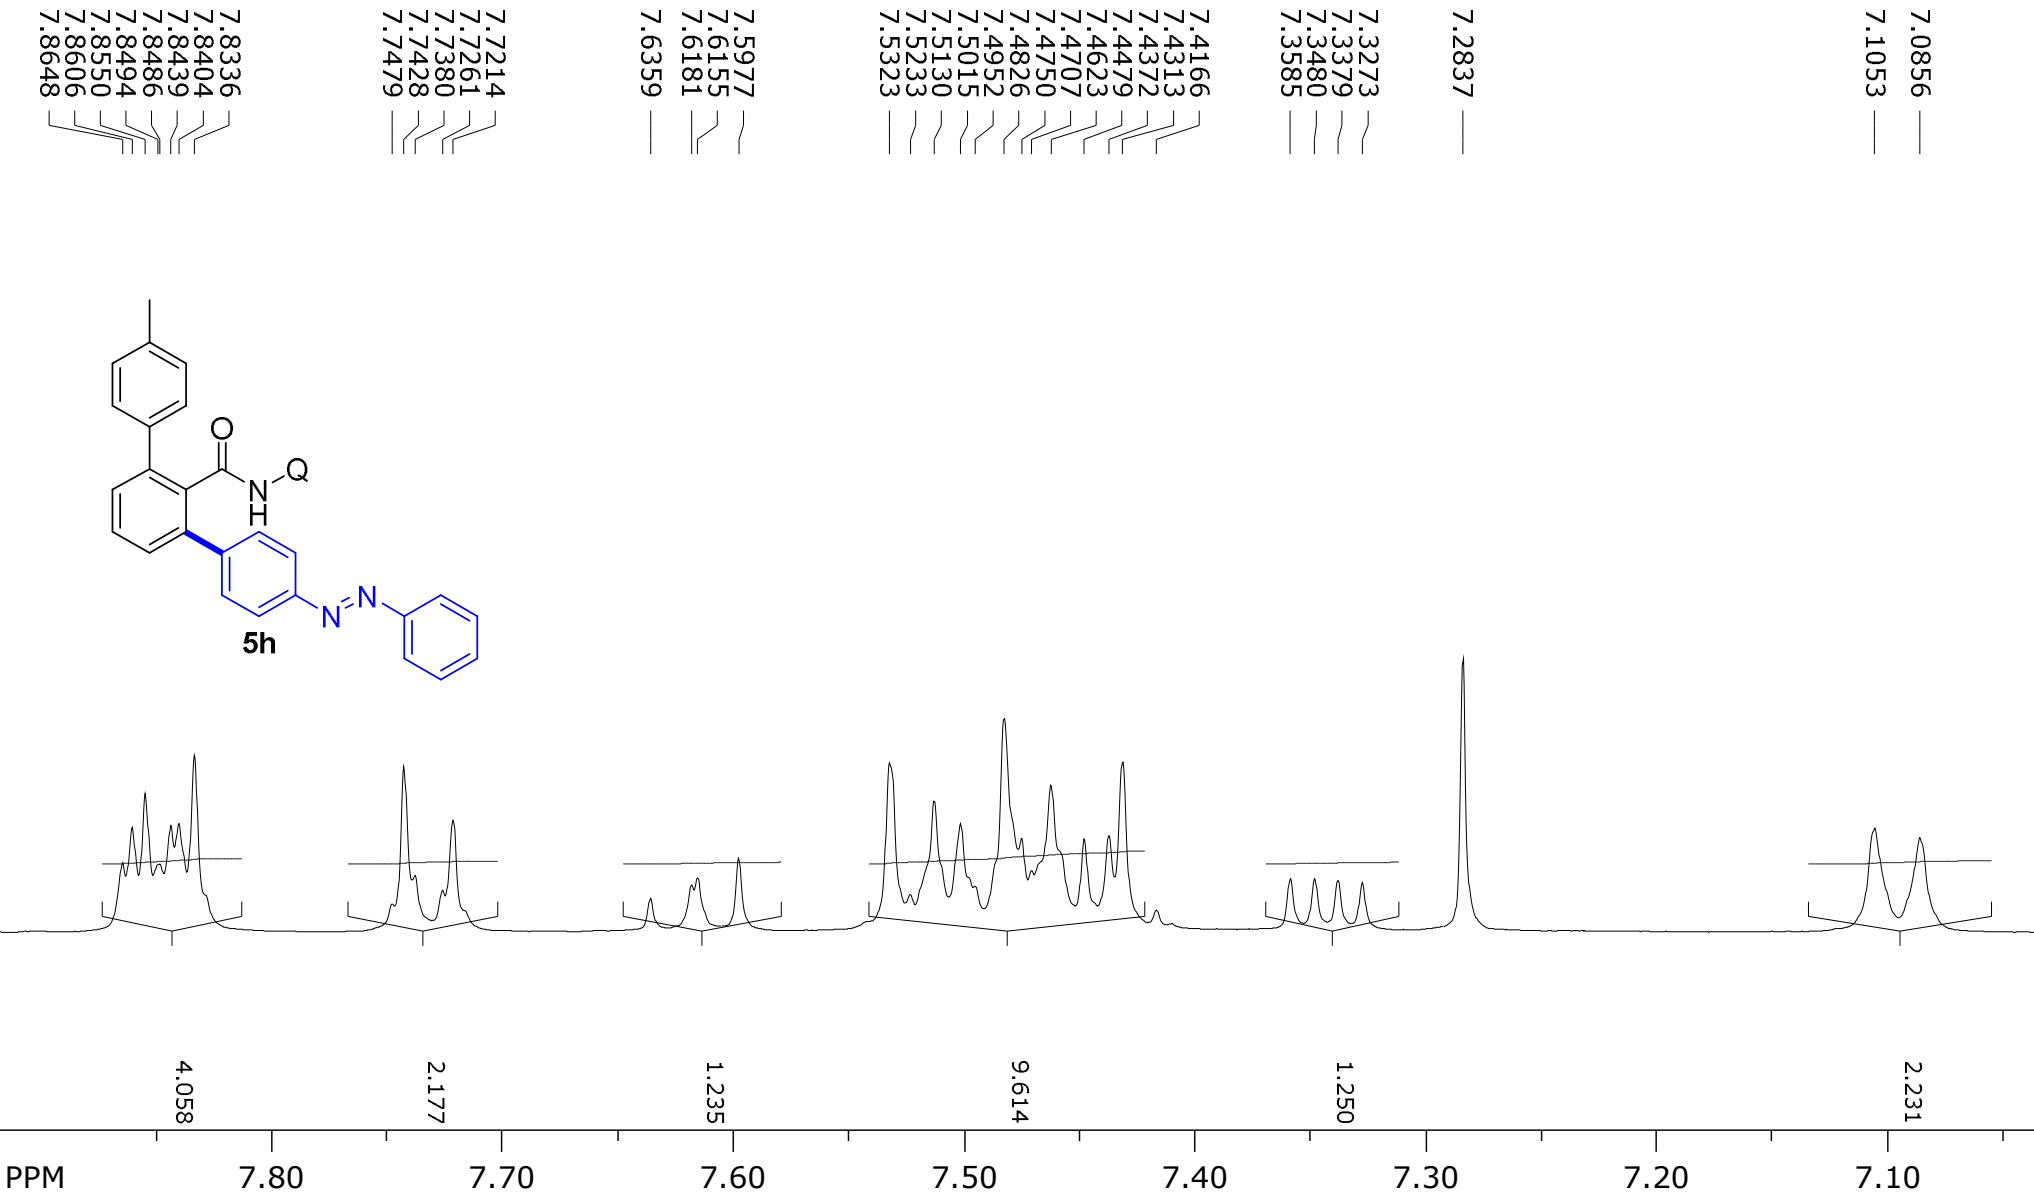

7.83336  
7.84404  
7.84339  
7.84886  
7.84994  
7.85550  
7.86006  
7.86648

7.72114  
7.7261  
7.7380  
7.7428  
7.7479

7.6359  
7.5977  
7.6155  
7.6181

7.5323  
7.5233  
7.5130  
7.5015  
7.4952  
7.4826  
7.4750  
7.4707  
7.4623  
7.4479  
7.4372  
7.4313  
7.4166

7.3585  
7.3480  
7.3379  
7.3273

7.2837

7.1053  
7.0856

SpinWorks 4: SS-797

C13CPD256 CDCl3 /opt/topspin3.5pl2/nmrdata nmrsu 2

167.461  
152.654  
151.618  
147.908  
143.327  
140.758  
139.639  
138.355  
137.301  
137.172  
136.000  
134.221  
130.918  
128.559  
127.688  
127.227  
122.854  
122.777  
121.622  
121.369  
116.590

76.732  
77.049  
77.367

21.110

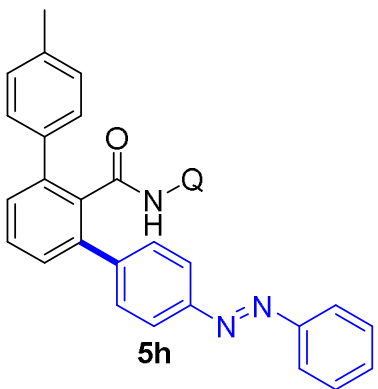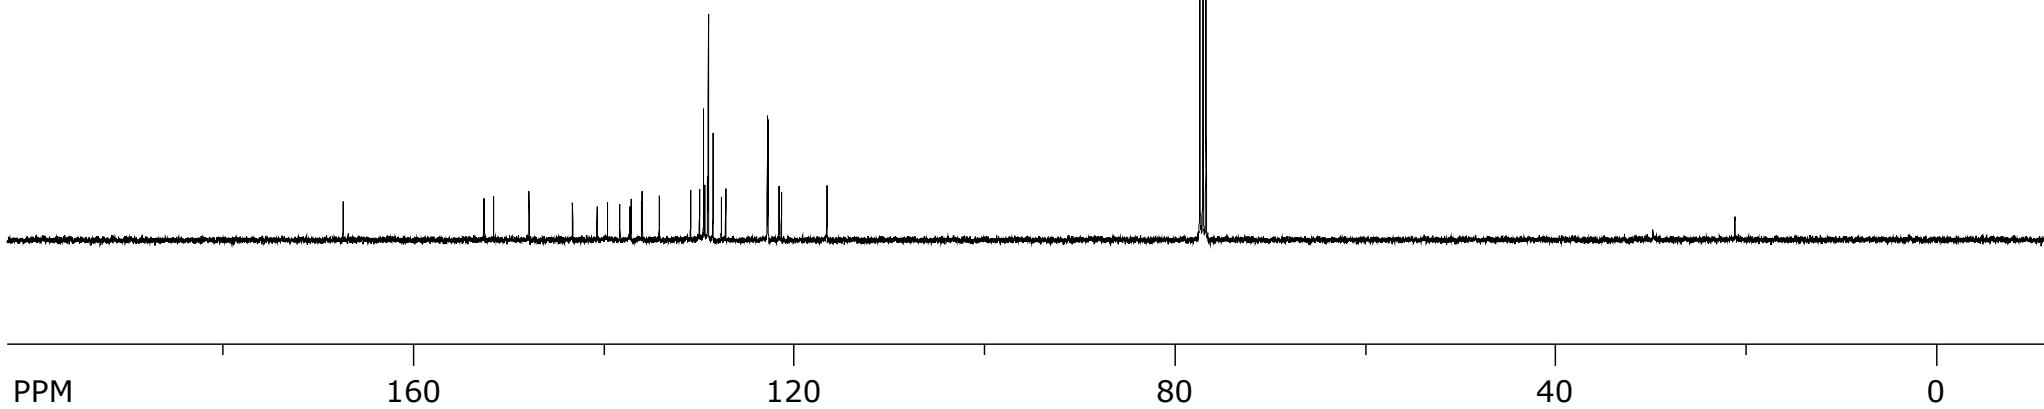

SpinWorks 4: SS-797  
C13CPD256 CDCl3 /opt/topspin3.5pl2/nmrdata nmrsu 2

167.461 —  
151.618 —  
152.654 —  
147.908 —  
143.327 —  
140.758 —  
139.639 —  
138.355 —  
137.301 —  
137.172 —  
136.060 —  
136.007 —  
134.221 —  
130.918 —  
129.978 —  
129.554 —  
129.420 —  
129.119 —  
129.051 —  
128.559 —  
127.688 —  
127.227 —  
122.854 —  
121.622 —  
121.369 —  
116.590 —

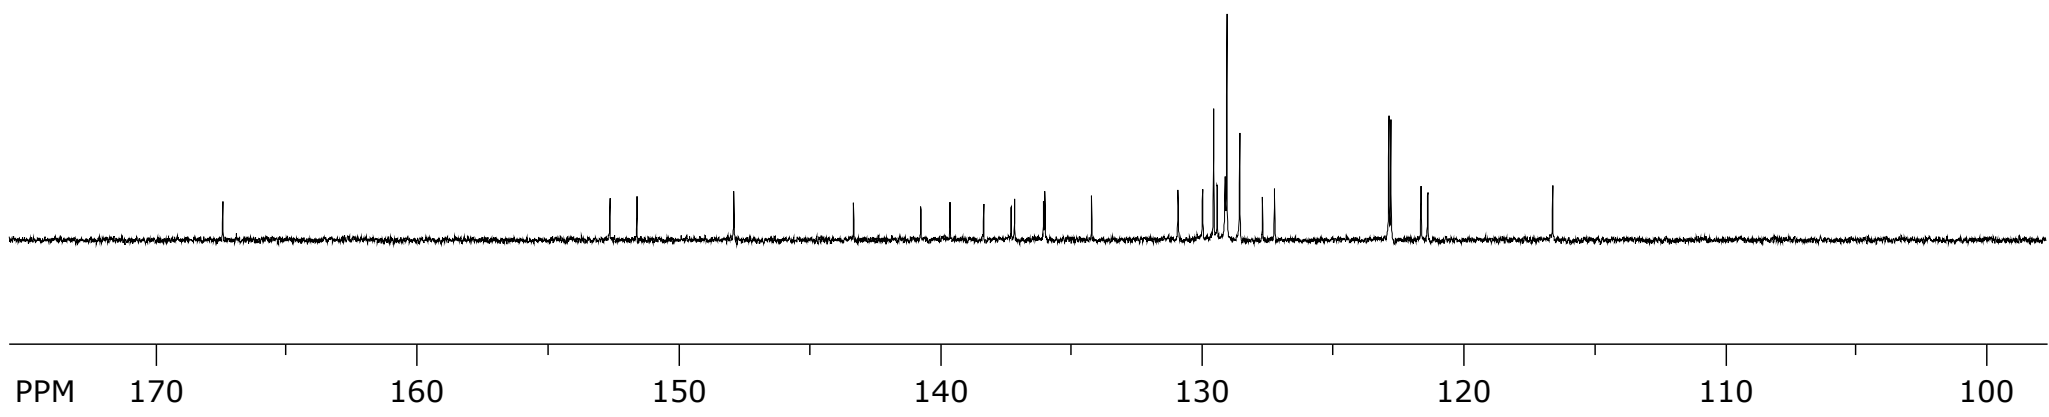





SpinWorks 4: ss-743 rep  
PROTON CDCl3 /opt/topspin3.5pl2/nmrdata nmrsu 2

9.9496

8.8546  
8.8570  
8.8736  
8.8759

8.5249  
8.5288  
8.5354  
8.5393

8.2083  
8.2128

8.0529  
8.0566  
8.0736  
8.0773

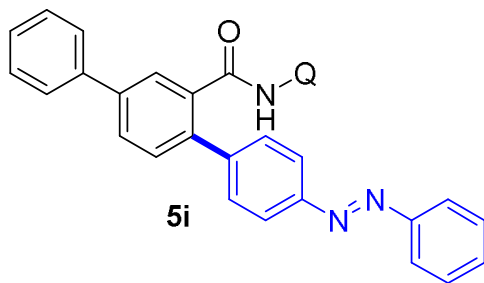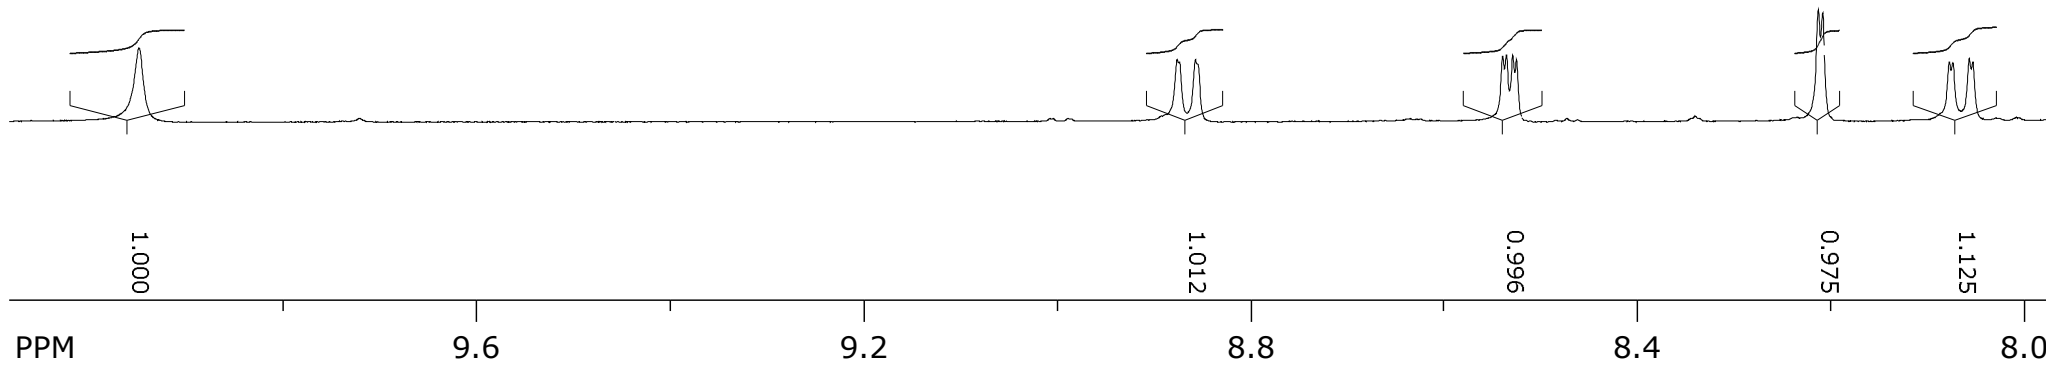

SpinWorks 4: ss-743 rep  
PROTON CDCl3 /opt/topspin3.5pl2/nmrdata nmrsu 2

7.8509  
7.8559  
7.8593  
7.8624  
7.8665  
7.8707  
7.8761  
7.8791  
7.8835  
7.8905  
7.9115

7.7431  
7.7629

7.6508  
7.6709

7.5781  
7.5579  
7.5466  
7.5417  
7.5382  
7.5284  
7.5209  
7.5128  
7.5086  
7.5019  
7.4946  
7.4909  
7.4782  
7.4673  
7.4559  
7.4375  
7.4190

7.2836  
7.2907  
7.3013  
7.3114  
7.3220

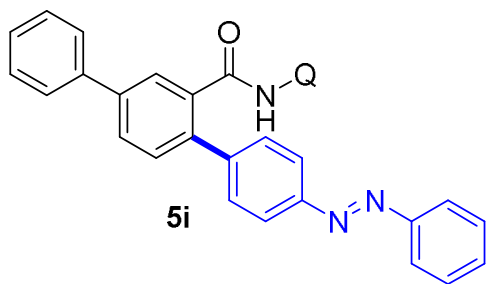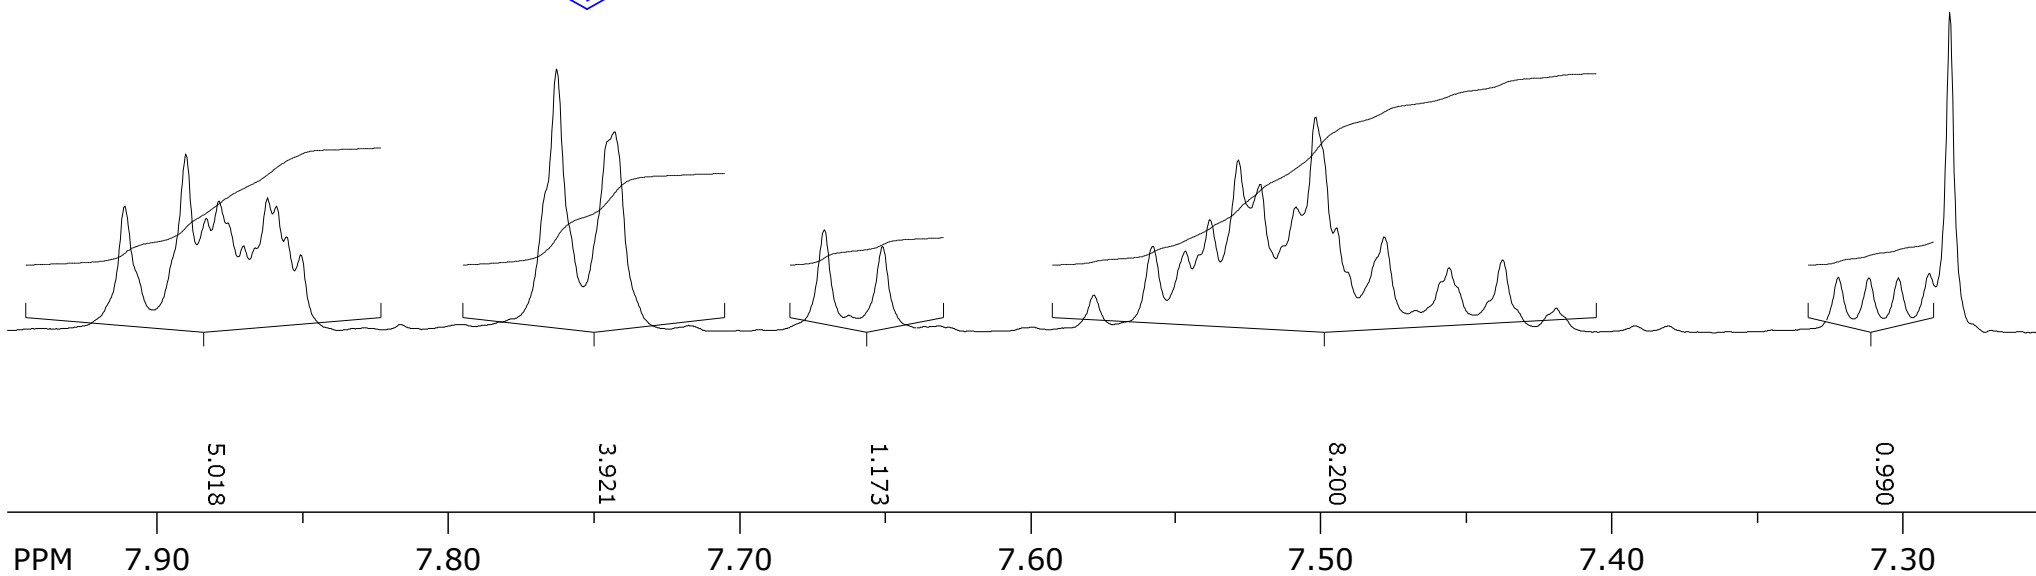

SpinWorks 4: 88-743REP  
C13CPD256 CDCl3 /opt/topspin3.5pl2/nmrdata nmrsu 10

116.487  
121.482  
121.828  
122.827  
123.153  
127.203  
127.273  
127.787  
127.898  
131.098  
131.098  
134.433  
136.063  
136.641  
138.166  
138.427  
139.730  
141.083  
142.466  
147.979  
151.988  
152.660  
167.573

76.774  
77.092  
77.409

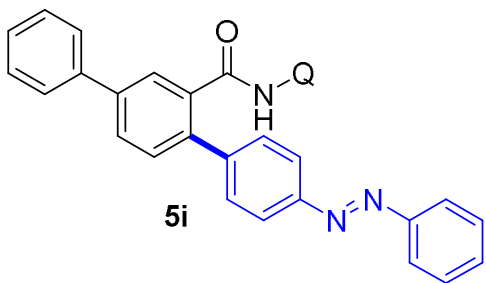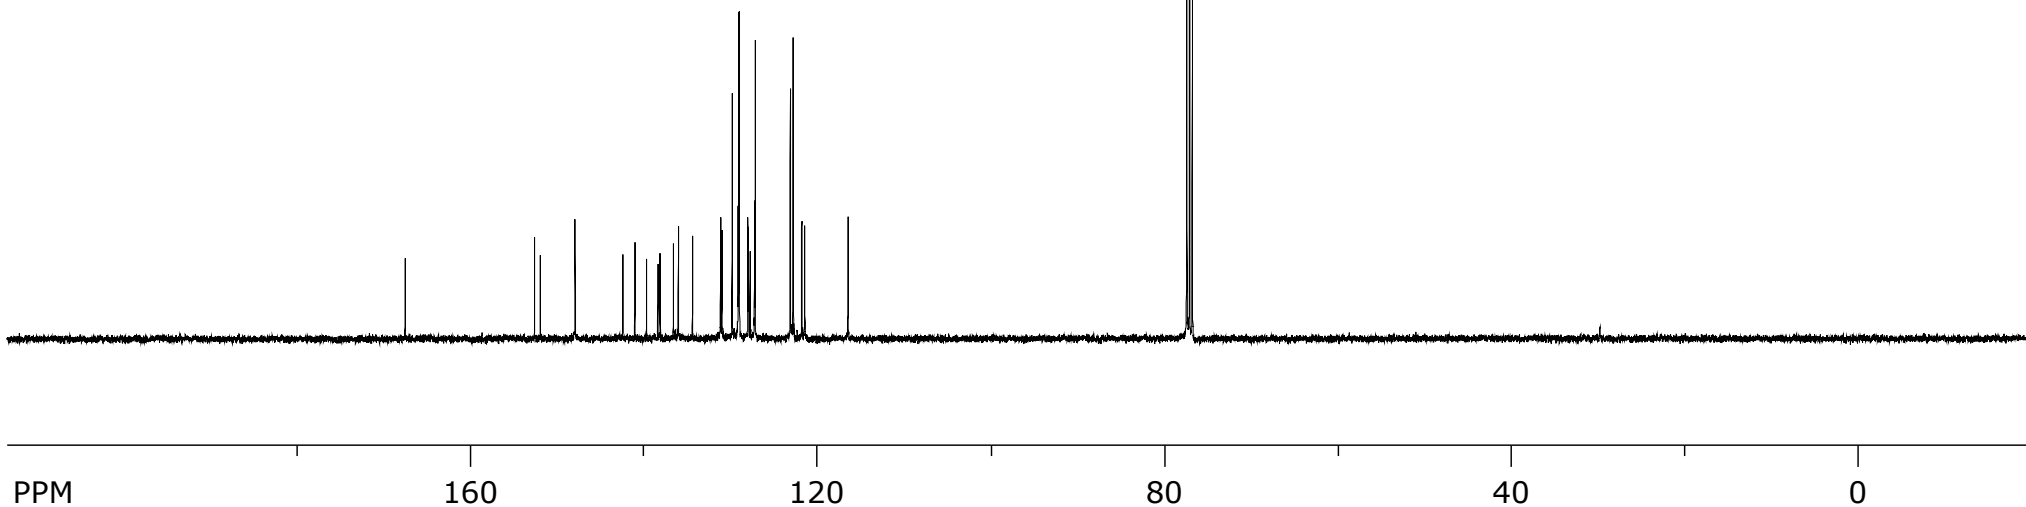

SpinWorks 4: 88-743REP  
C13CPD256 CDCl3 /opt/topspin3.5pl2/nmrdata nmrsu 10

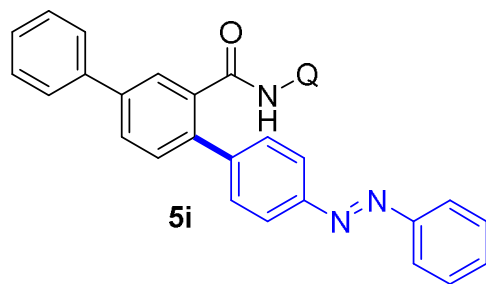

167.573

151.988  
152.660

147.979

142.466  
136.065  
136.641  
138.166  
138.427  
139.730  
141.083

134.433  
131.190  
129.857  
131.036  
129.181  
129.104  
129.038  
128.037  
127.967  
127.787  
127.273  
127.203

123.153  
121.828  
121.482  
122.827

116.487

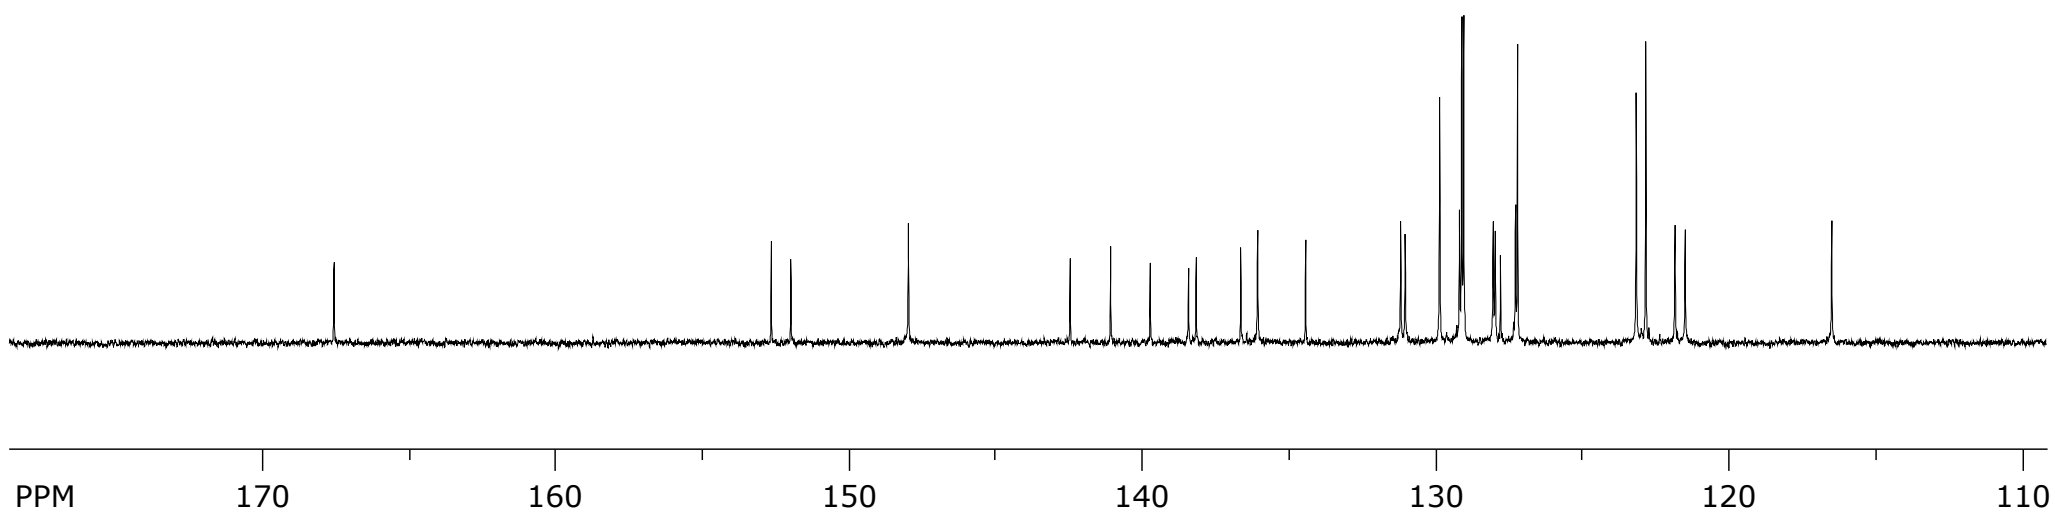

SpinWorks 4: SS 744  
PROTON CDCl3 /opt/topspin3.5pl2/nmrdata nmrsu 1

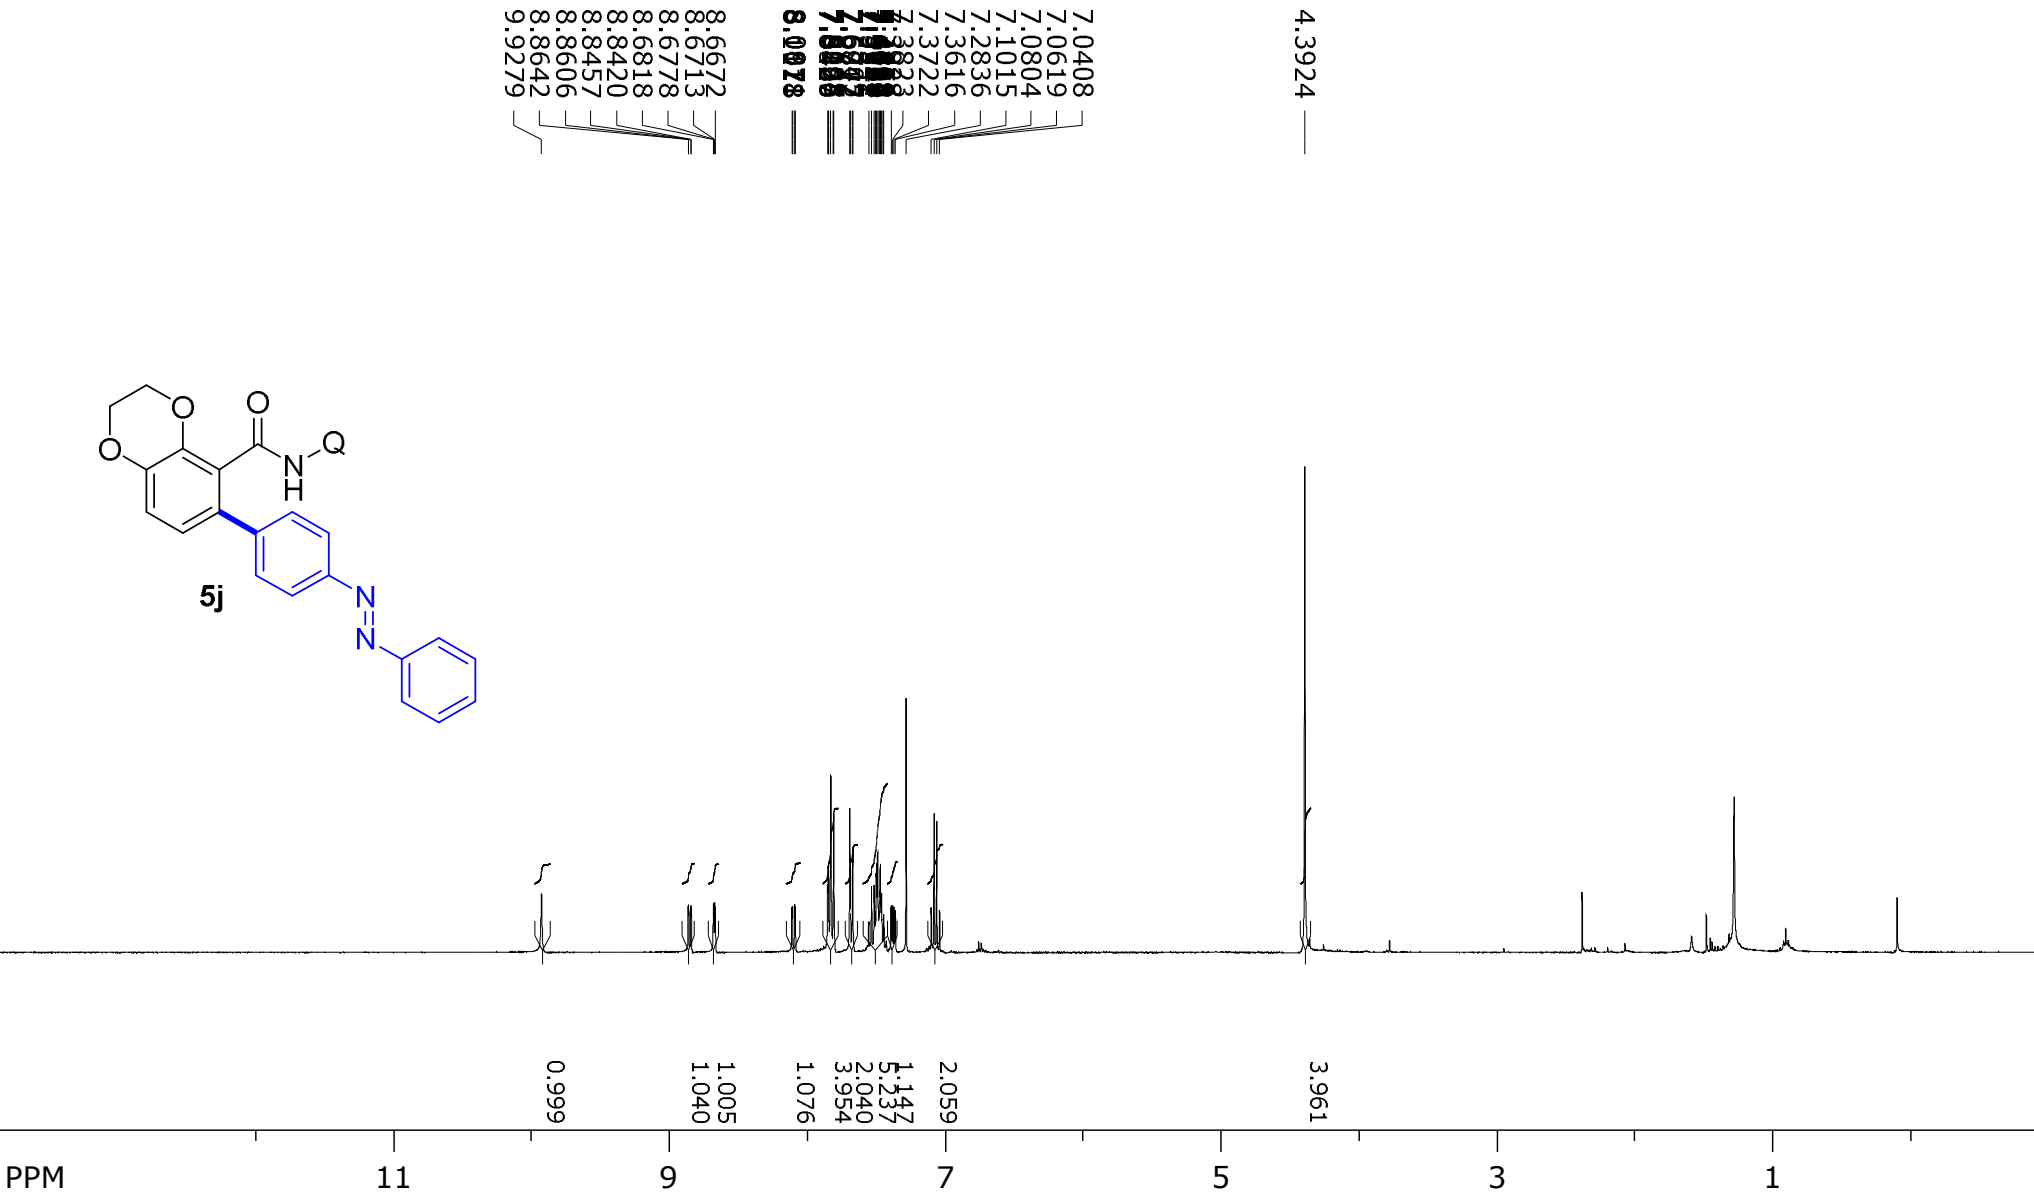

SpinWorks 4: SS 744  
PROTON CDCl3 /opt/topspin3.5pl2/nmrdata nmrsu 1

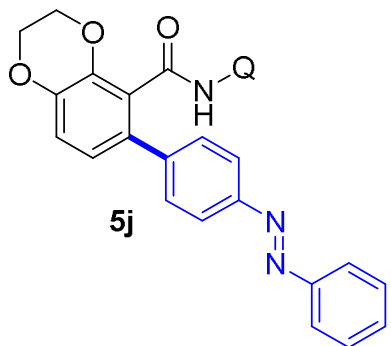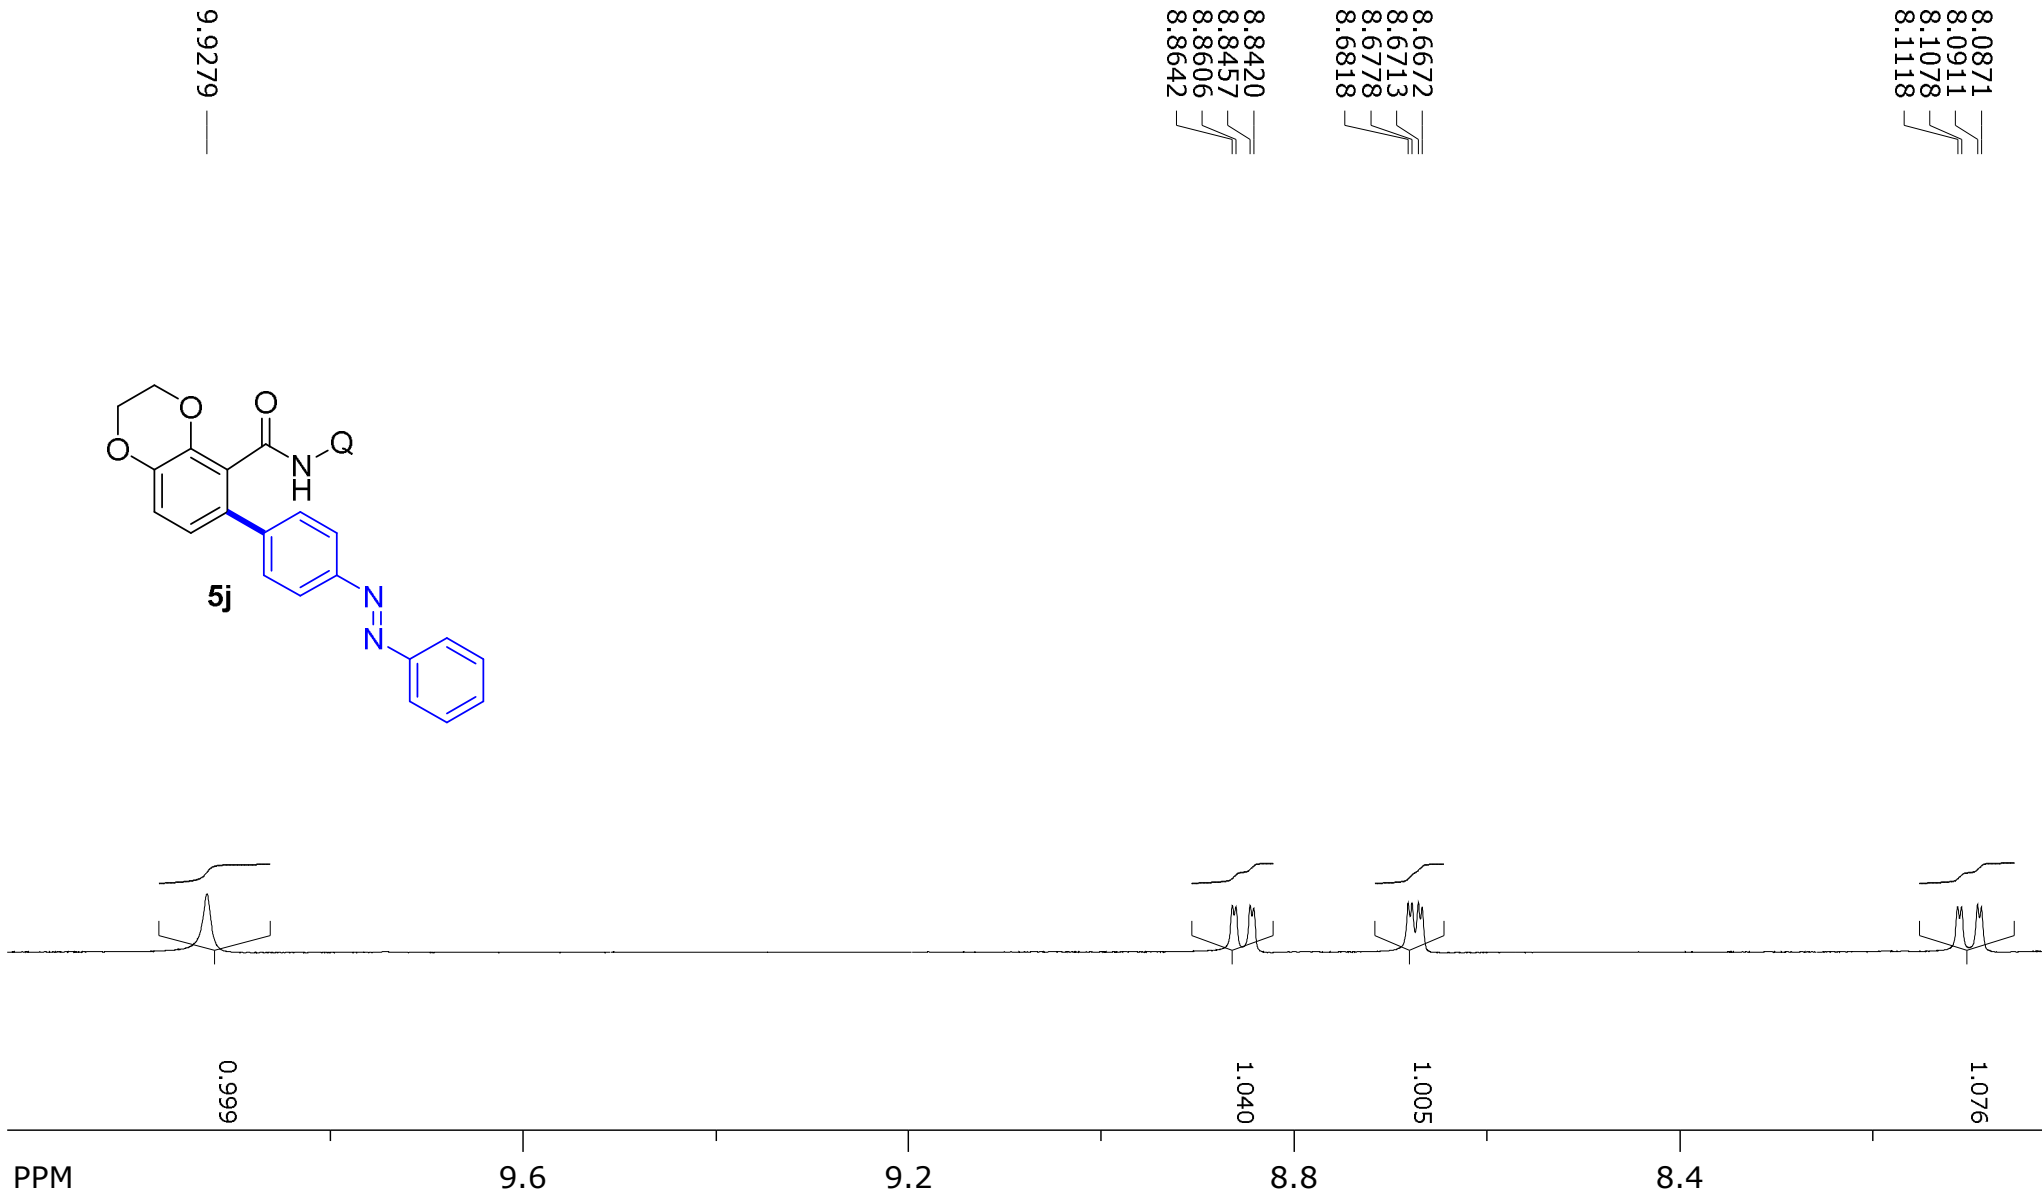

SpinWorks 4: SS 744  
PROTON CDCl3 /opt/topspin3.5pl2/nmrdata nmrsu 1

7.8085  
7.8128  
7.8297  
7.8435  
7.8485  
7.8526

7.6705  
7.6747  
7.6872  
7.6917

7.5547  
7.5342  
7.5154  
7.5065  
7.5005  
7.4966  
7.4902  
7.4797  
7.4753  
7.4714  
7.4628  
7.4591  
7.4528  
7.4459  
7.3928  
7.3823  
7.3722  
7.3616

7.2836

7.1015  
7.0804  
7.0619  
7.0408

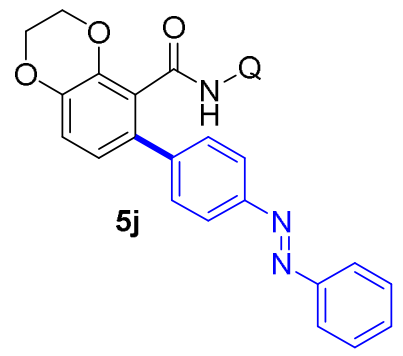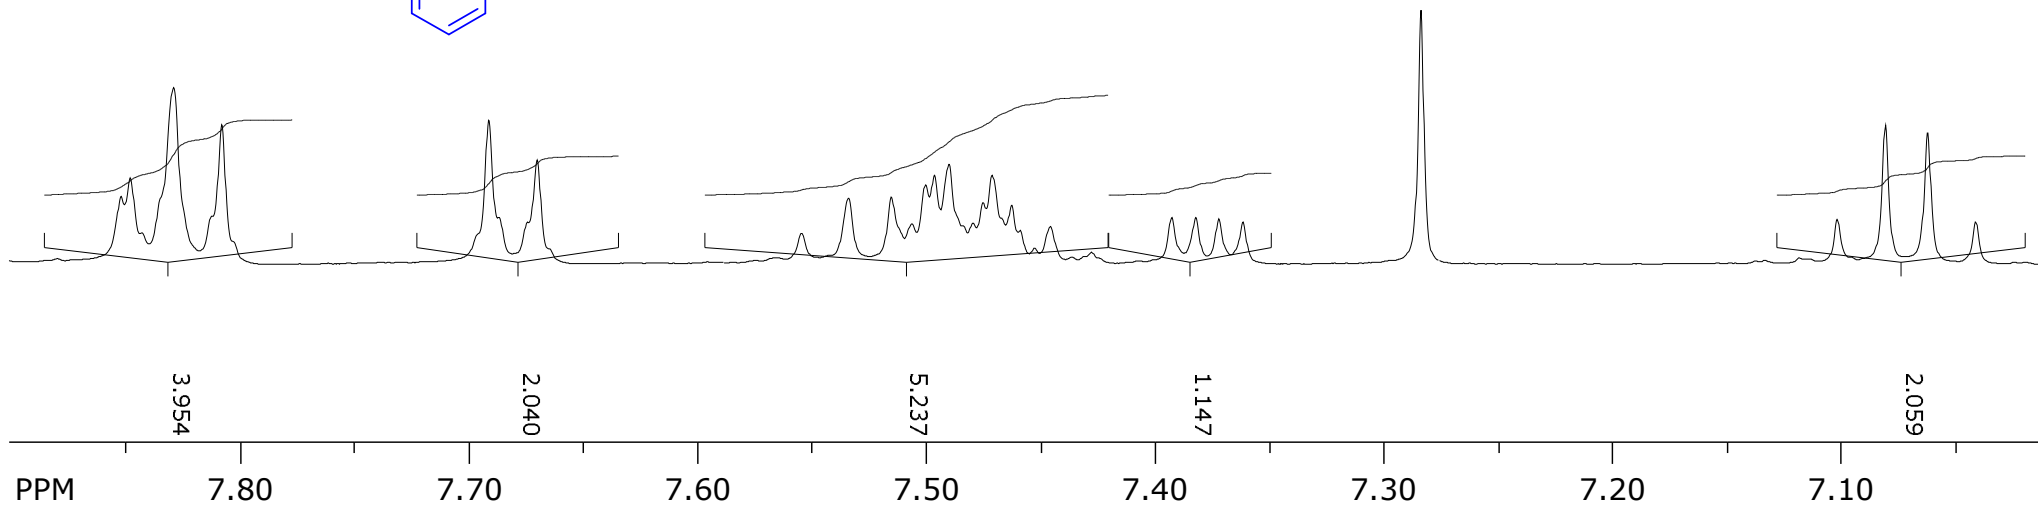



SpinWorks 4: SS 744  
PROTON CDCl3 /opt/topspin3.5pl2/nmrdata nmrsu 1

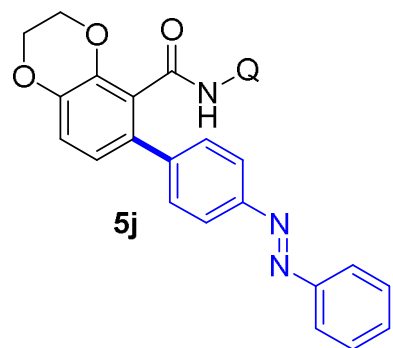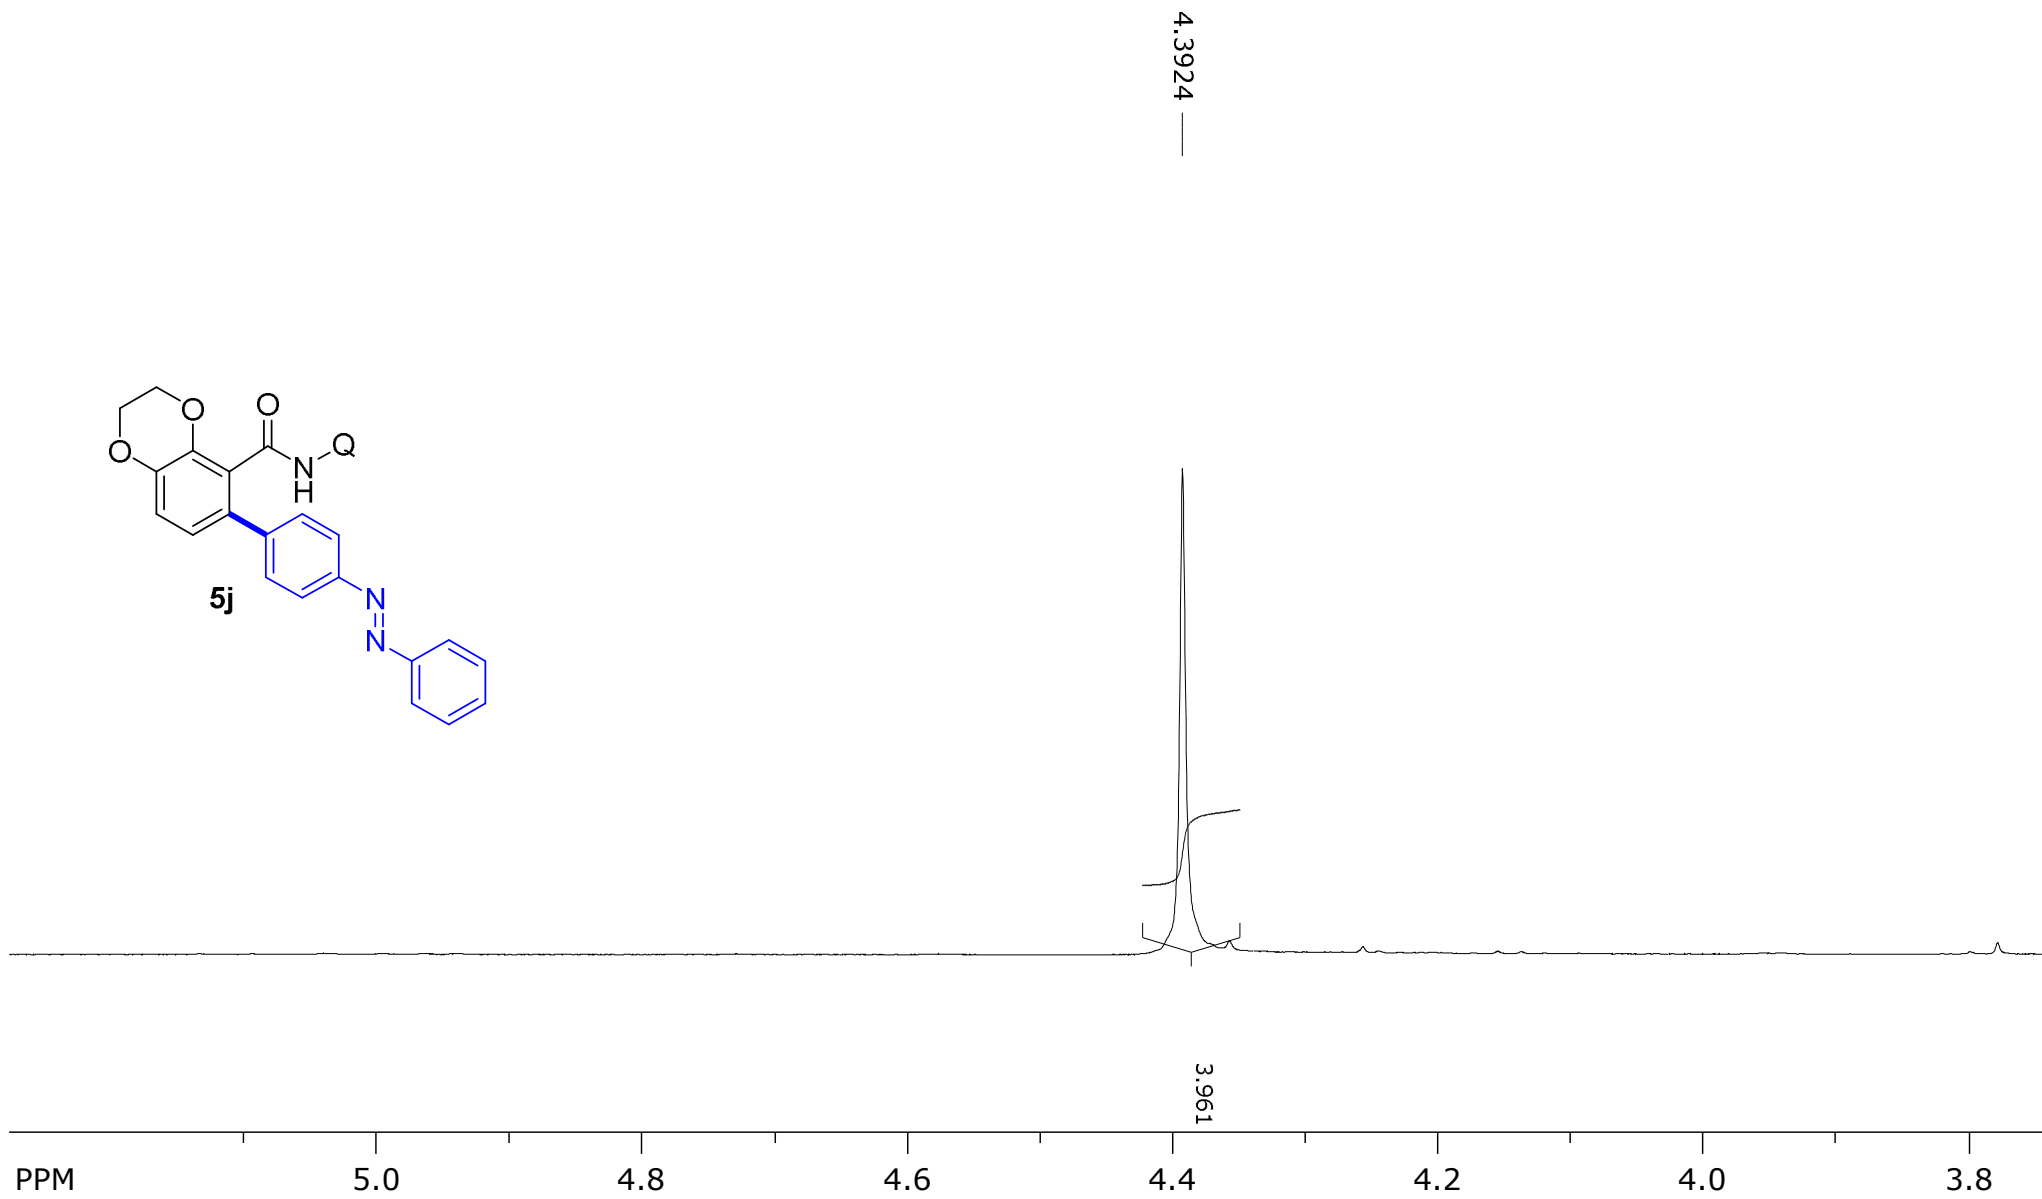

SpinWorks 4: SS 744  
C13CPD CDCl3 /opt/topspin3.5pl2/nmrdata nmrsu 29

117.245  
118.454  
121.445  
121.942  
122.755  
122.891  
122.911  
126.235  
127.028  
127.038  
129.008  
130.877  
132.559  
134.201  
136.660  
137.993  
141.291  
142.727  
143.558  
147.798  
151.433  
152.649  
165.127

64.271  
64.670  
76.744  
77.062  
77.380

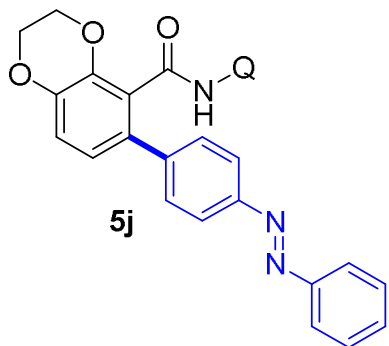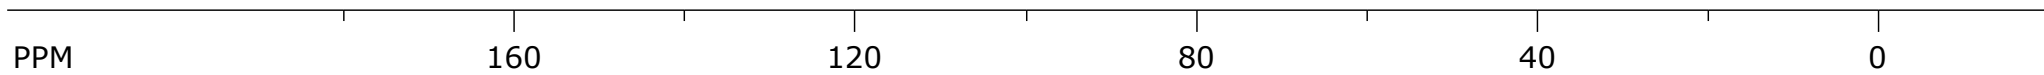

SpinWorks 4: SS 744  
C13CPD CDCl3 /opt/topspin3.5pl2/nmrdata nmrsu 29

165.127 —  
152.649 —  
151.433 —  
147.798 —  
143.558 —  
142.727 —  
141.291 —  
137.993 —  
136.660 —  
134.201 —  
132.559 —  
130.877 —  
129.363 —  
129.041 —  
127.942 —  
127.536 —  
126.235 —  
122.911 —  
122.891 —  
122.755 —  
121.942 —  
121.445 —  
118.454 —  
117.245 —

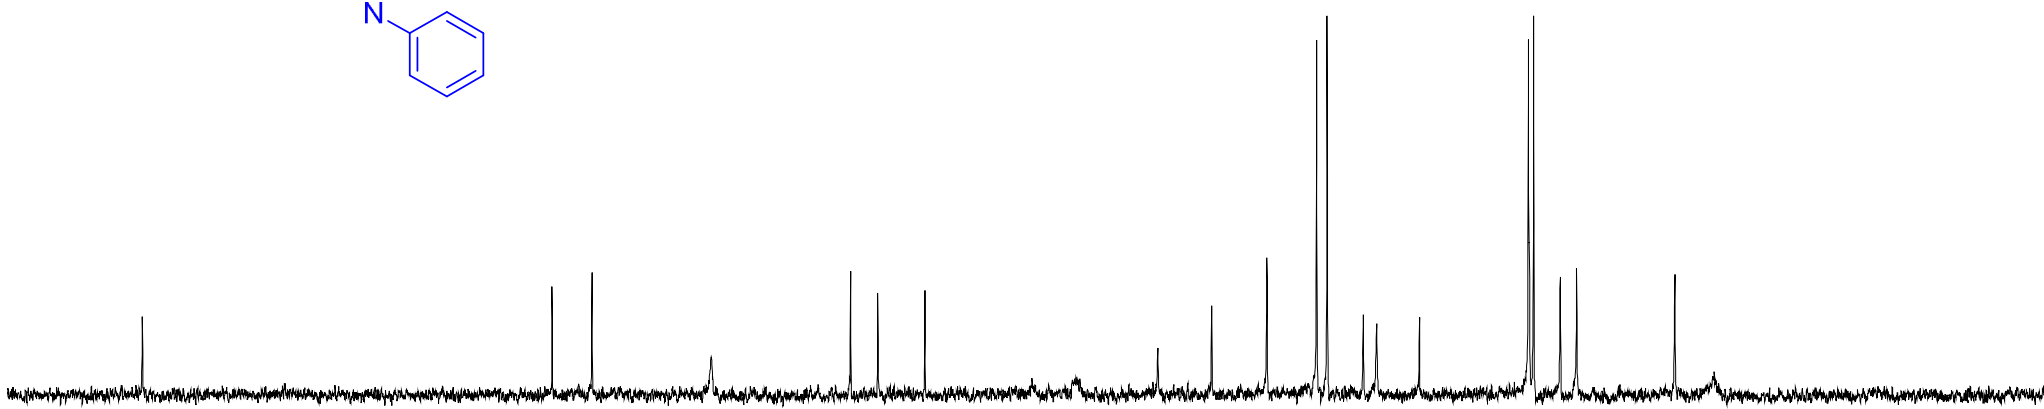

PPM

160

150

140

130

120

110

SpinWorks 4: SS 70  
PROTON CDCl3 /opt/topspin3.5pl2/nmrdata nmrsu 19

10.8598  
8.8297  
8.8337  
8.8402  
8.8443  
8.8721  
8.8782  
8.8885  
8.8946  
8.1888  
8.1888  
8.1888  
7.6928  
7.4947  
7.4852  
7.4745  
7.4644  
7.4538  
7.2661  
6.7796  
6.7840  
7.7796  
7.2661  
7.4538  
7.4644  
7.4745  
7.4852  
7.4947  
7.6928  
8.1888  
8.1888  
8.1888

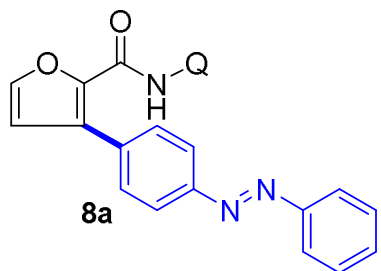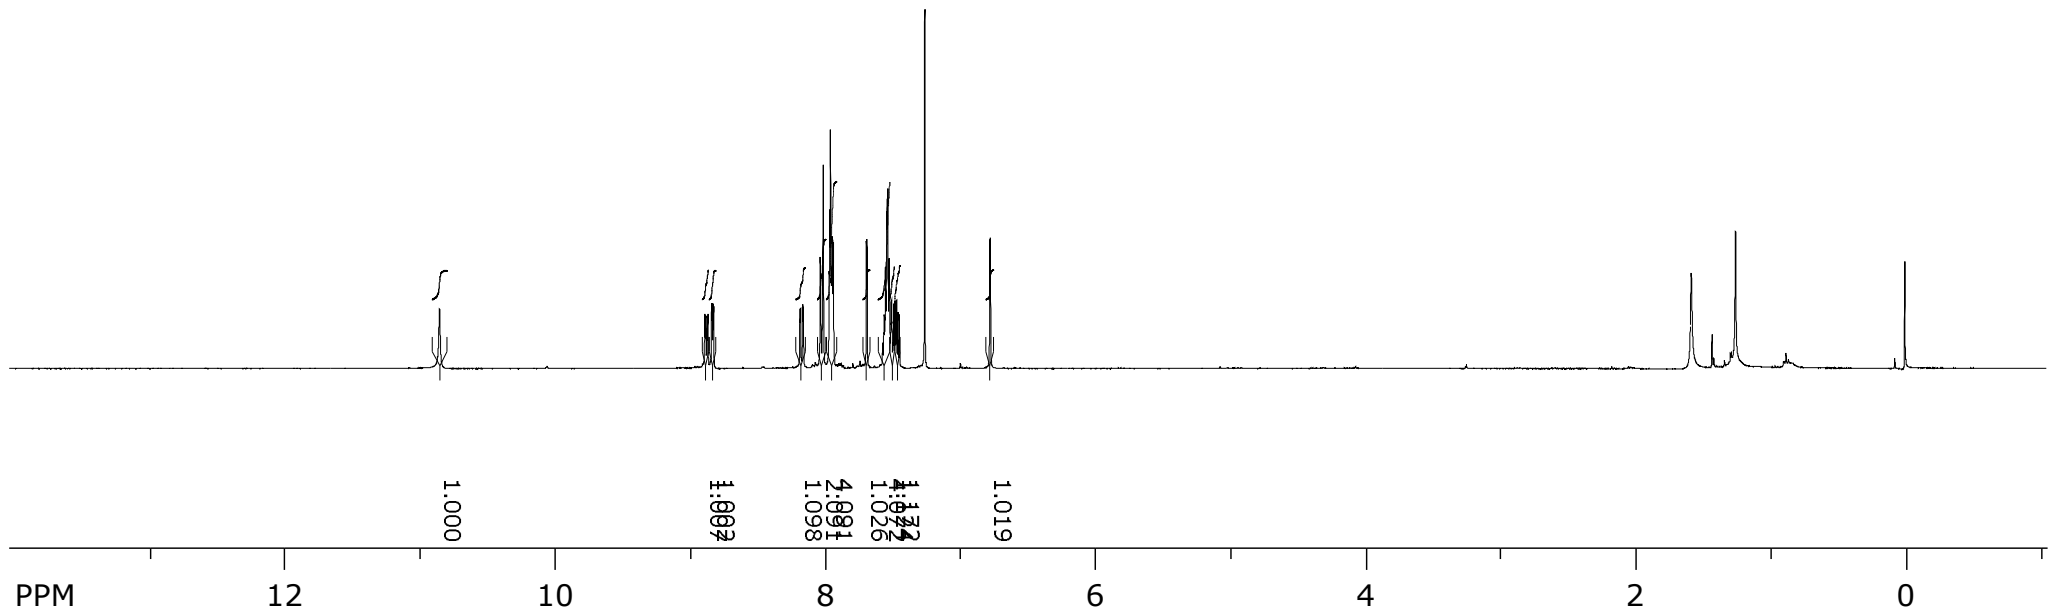

SpinWorks 4: SS 70  
PROTON CDCl3 /opt/topspin3.5pl2/nmrdata nmrsu 19

8.8297  
8.8337  
8.8402  
8.8443  
8.8721  
8.8782  
8.8885  
8.8946

8.1649  
8.1689  
8.1856  
8.1896

8.0180  
8.0225  
8.0352  
8.0394

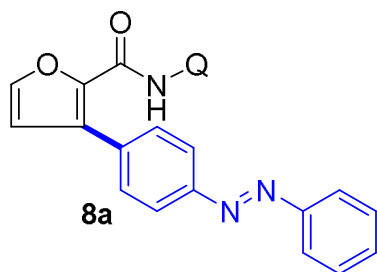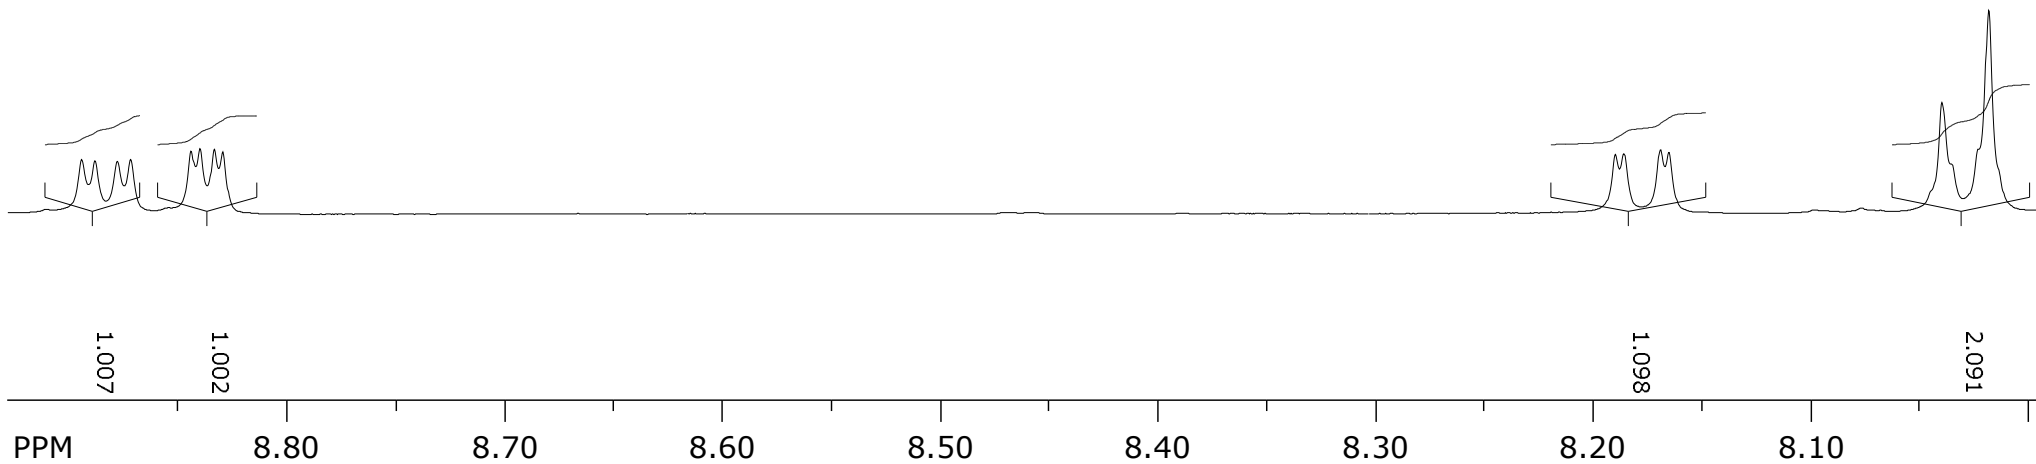

SpinWorks 4: SS 70  
PROTON CDCl3 /opt/topspin3.5pl2/nmrdata nmrsu 19

7.9425  
7.9491  
7.9518  
7.9561  
7.9589  
7.9640  
7.9692  
7.9730

7.6933  
7.6976

7.4538  
7.4644  
7.4745  
7.4852  
7.4947  
7.5090  
7.5123  
7.5159  
7.5291  
7.5324  
7.5400  
7.5443  
7.5478  
7.5567  
7.5652  
7.5689

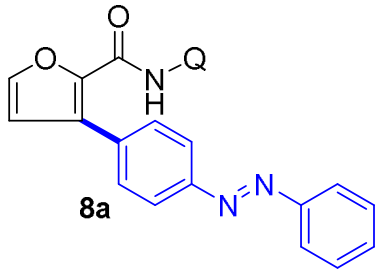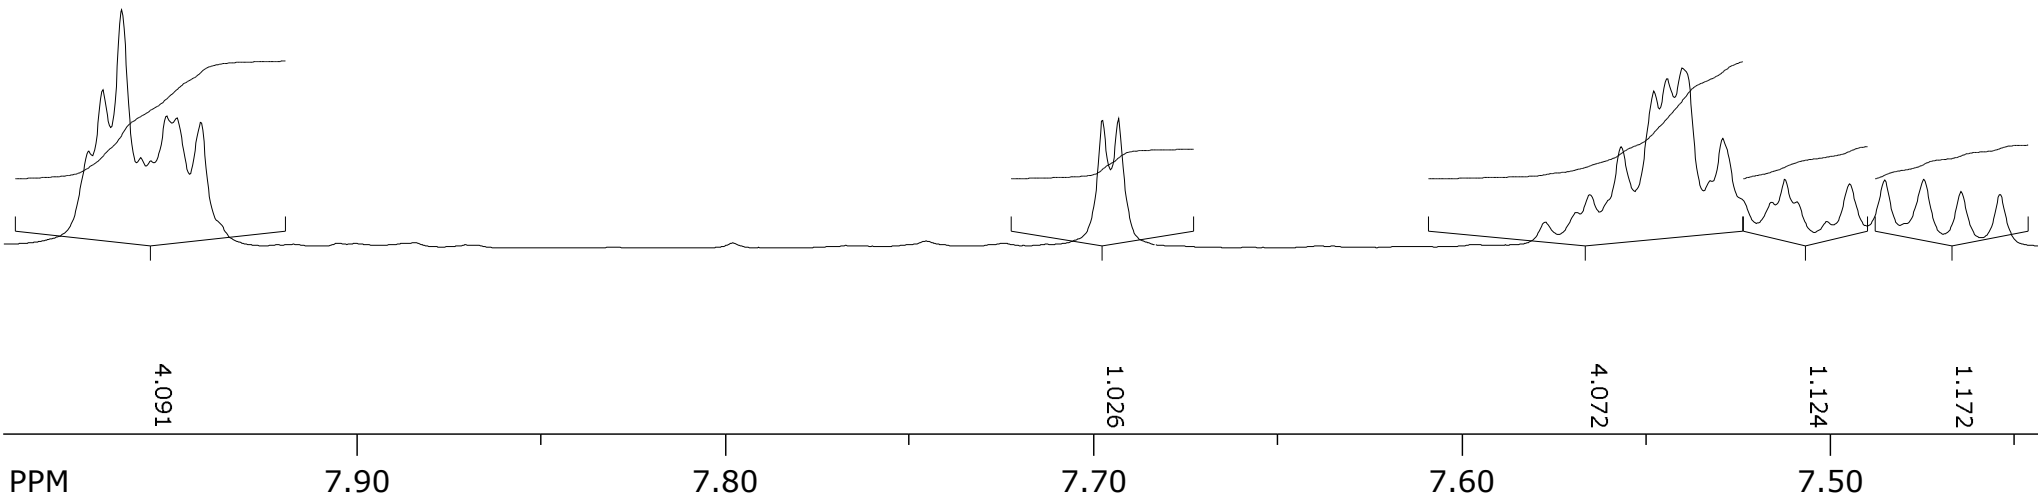

SpinWorks 4: SS-70-REP  
C13CPD256 CDCl3 /opt/topspin3.5pl2/nmrdata nmrsu 1

114.789  
116.773  
121.689  
121.773  
122.813  
122.941  
127.415  
128.036  
129.116  
130.380  
131.038  
131.466  
134.374  
134.607  
136.343  
138.744  
142.277  
143.558  
148.348  
152.231  
152.779  
156.772

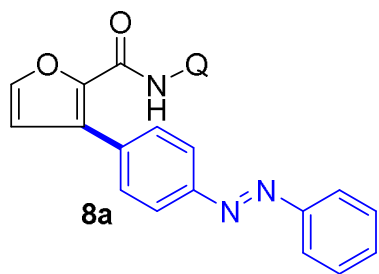

76.718  
77.035  
77.353

PPM

160

120

80

40

0

SS-42 p rep

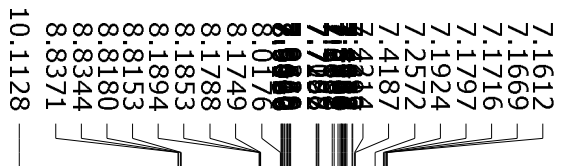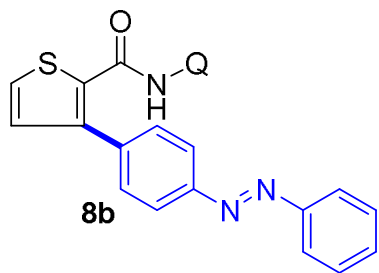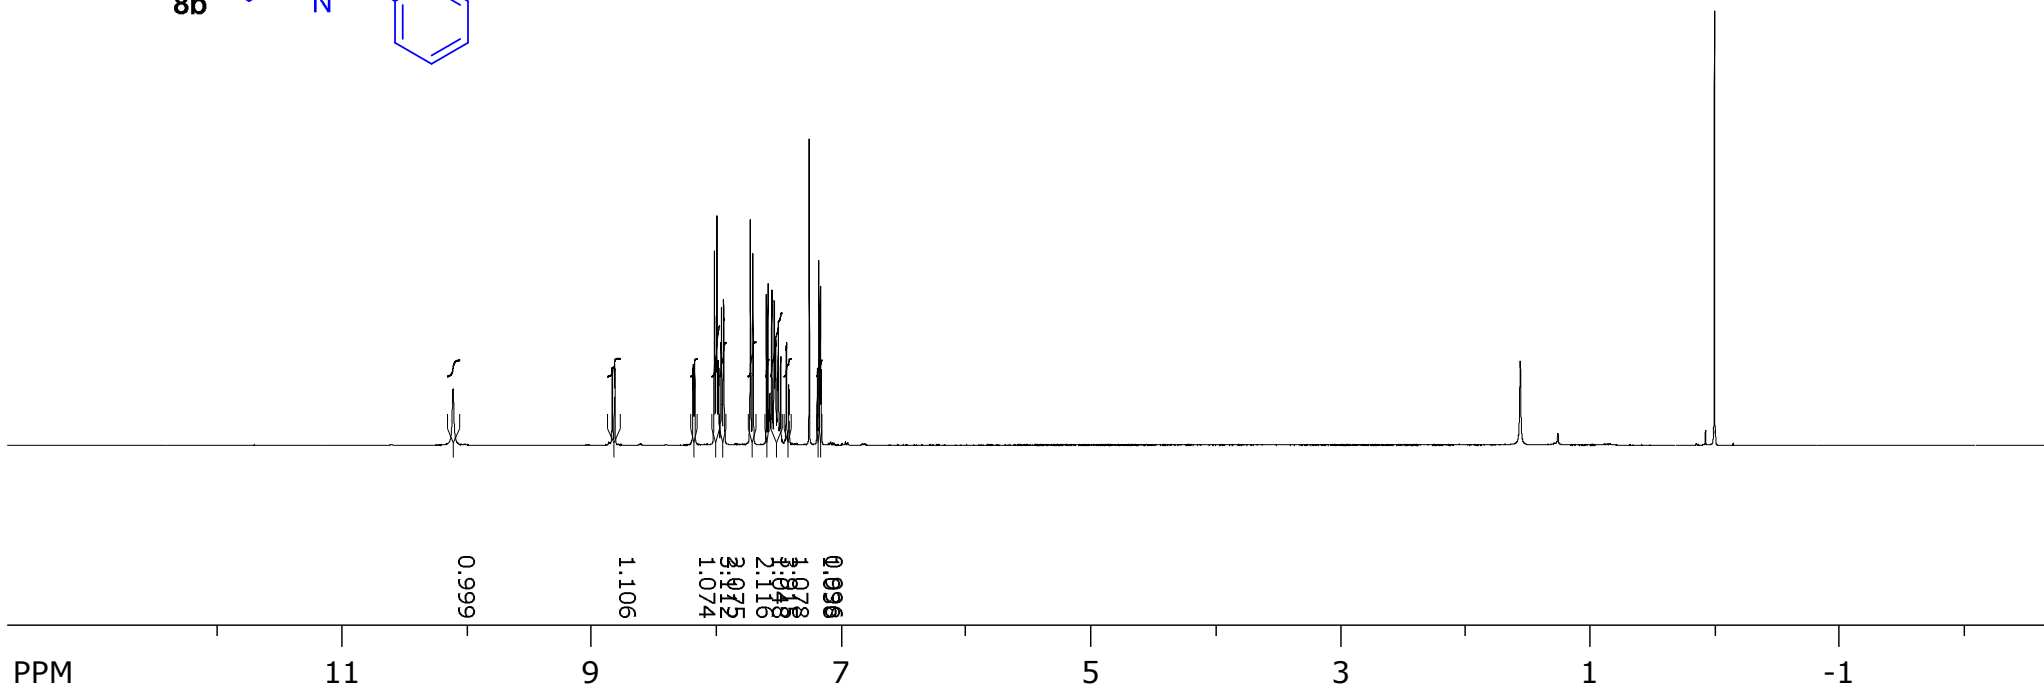



SpinWorks 4: DC-178

10.1128

8.8153  
8.8180  
8.8344  
8.8371

8.1749  
8.1788  
8.1853  
8.1894

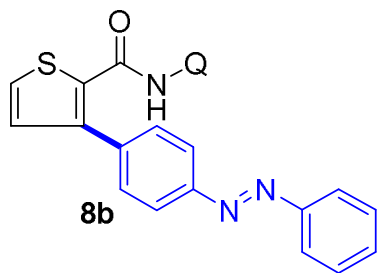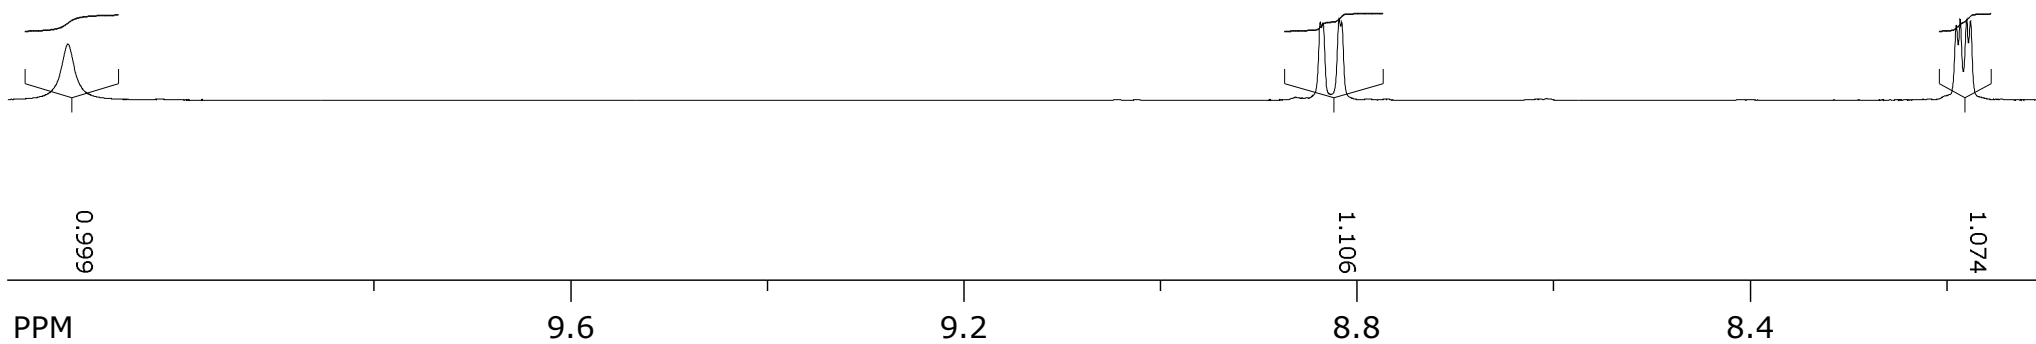

7.93339 —  
7.9410 —  
7.9436 —  
7.9558 —  
7.9606 —  
7.9646 —  
7.9820 —  
7.9860 —  
7.9967 —  
8.0020 —  
8.0066 —  
8.0136 —  
8.0176 —

7.7087 —  
7.7128 —  
7.7252 —  
7.7296 —

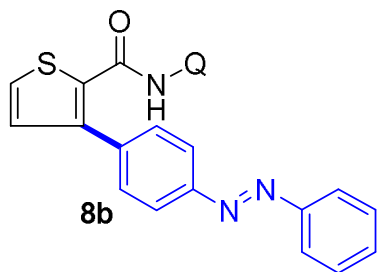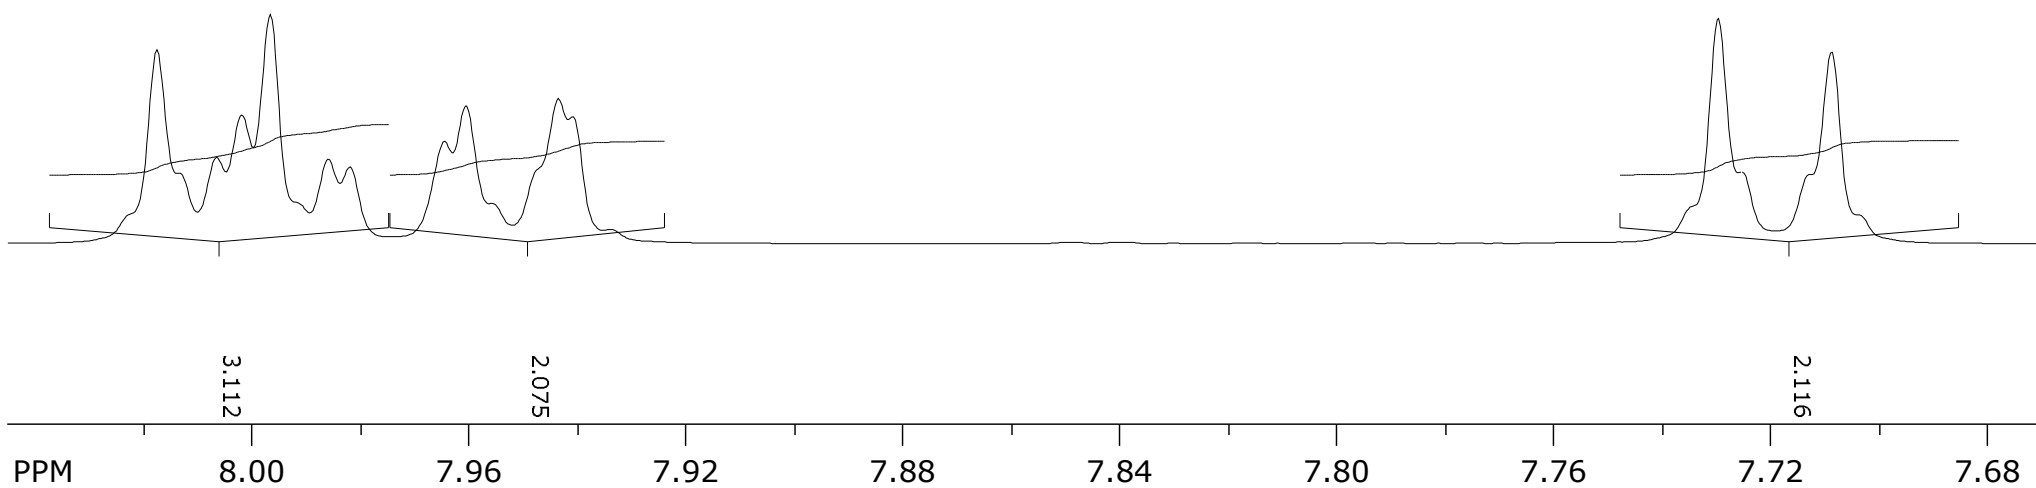

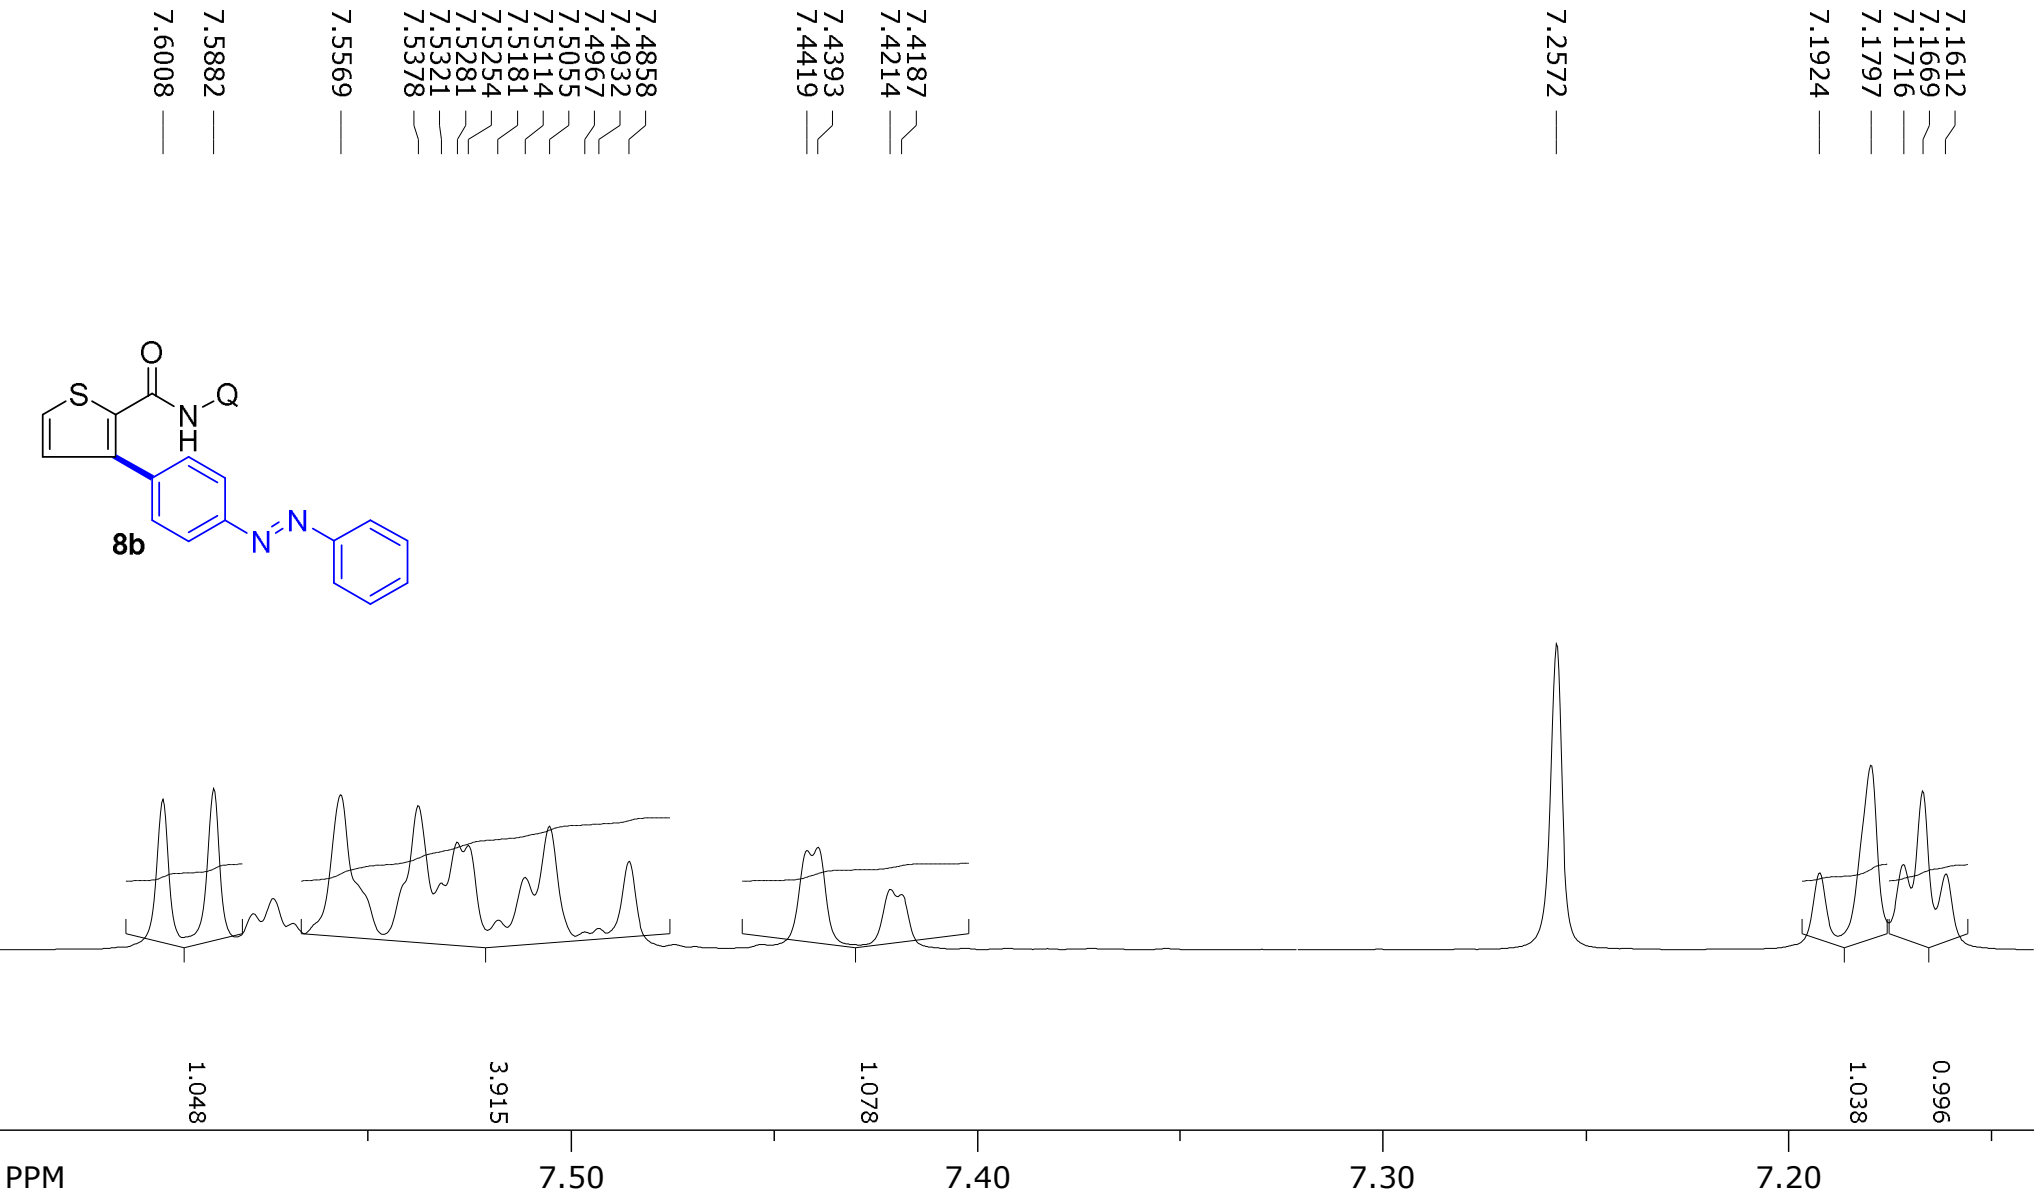

SpinWorks 4: SS 42 P REP  
C13CPD CDCI3 /opt/topspin3.5pl2/nmrdata nmrsu 58

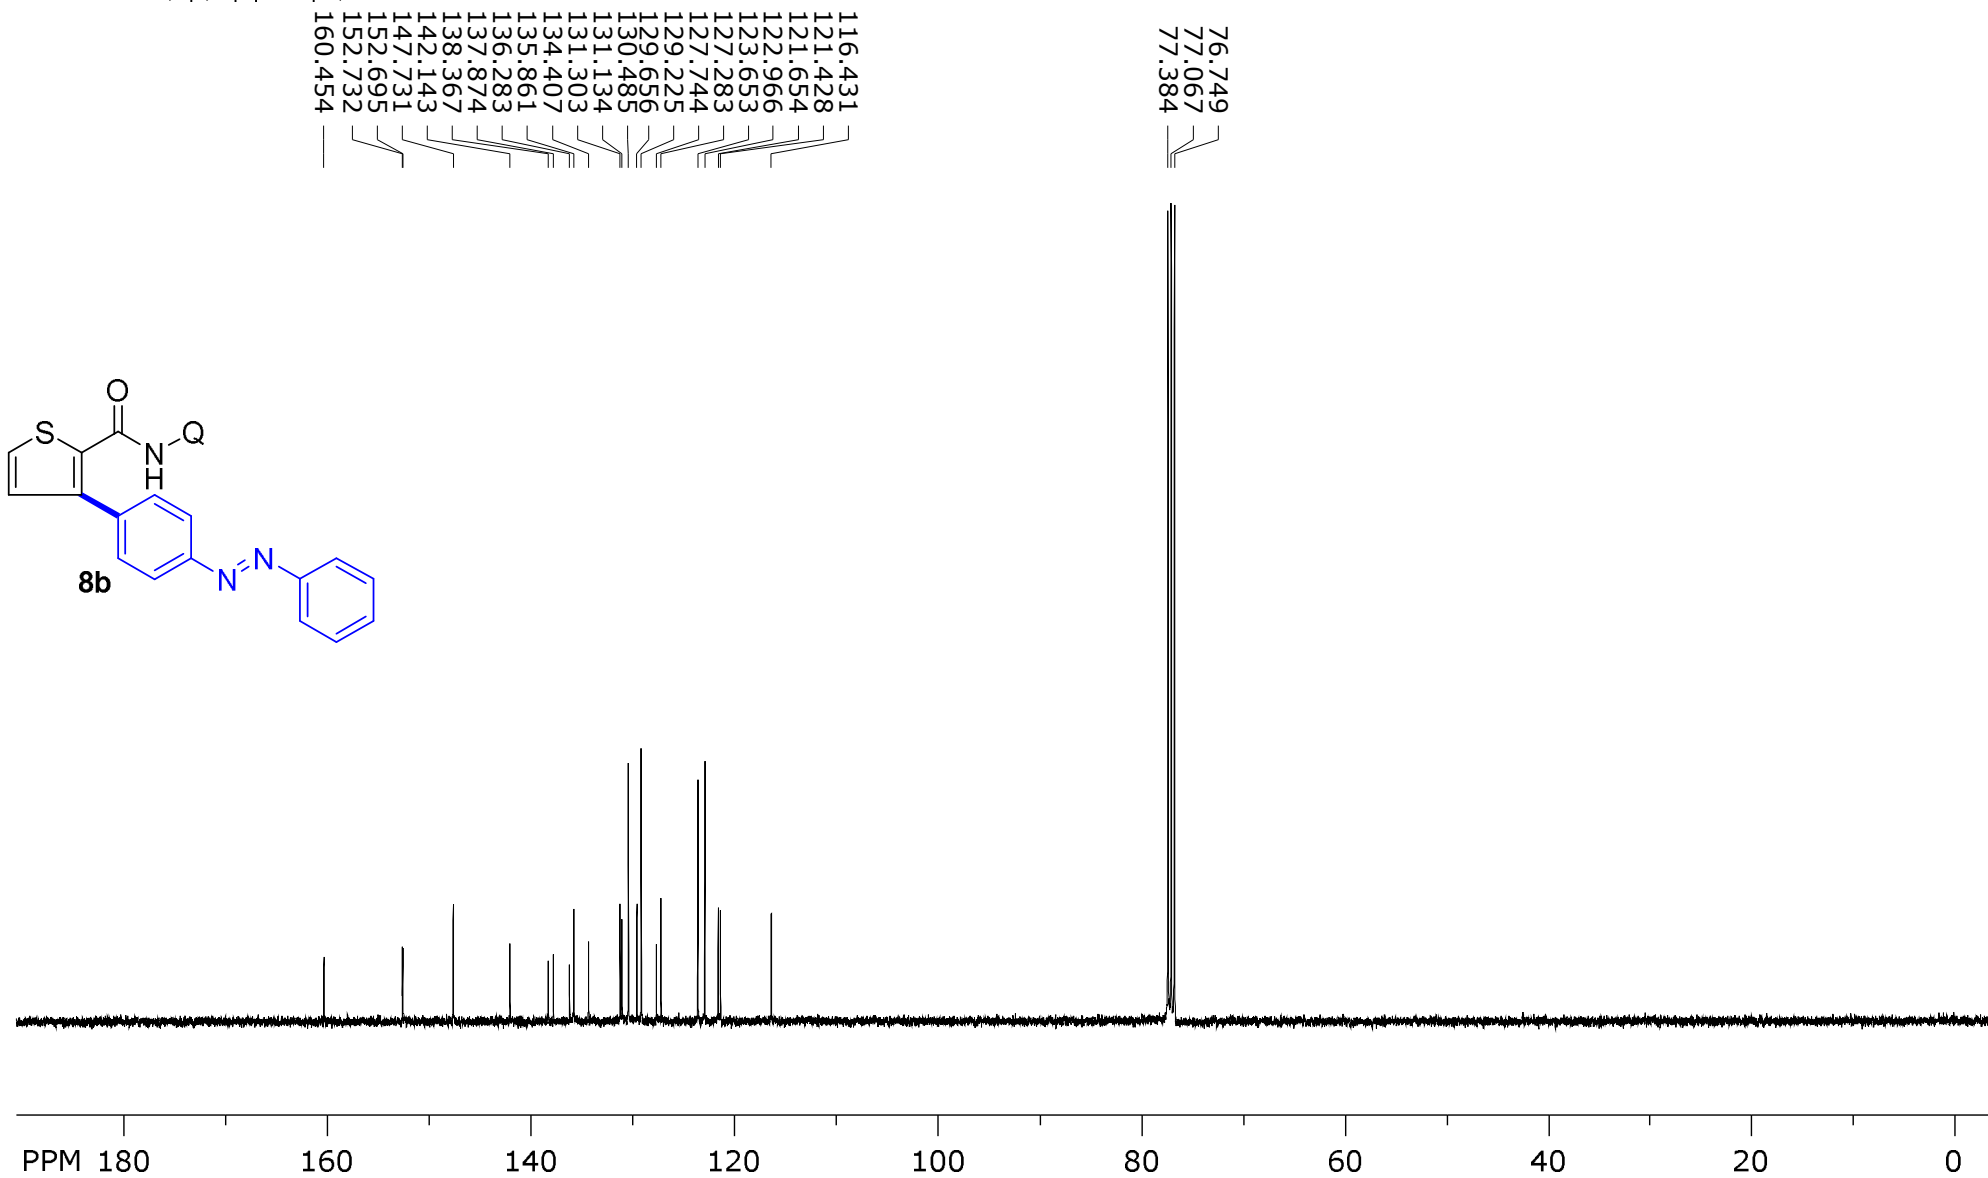

SpinWorks 4: SS 42 P REP  
C13CPD CDCl3 /opt/topspin3.5pl2/nmrdata nmrsu 58

160.454 —  
152.695 —  
152.732 —  
147.731 —  
142.143 —  
138.367 —  
137.874 —  
136.283 —  
135.861 —  
134.407 —  
131.303 —  
131.134 —  
130.485 —  
129.656 —  
129.225 —  
127.744 —  
127.283 —  
123.653 —  
122.966 —  
121.654 —  
121.428 —  
116.431 —

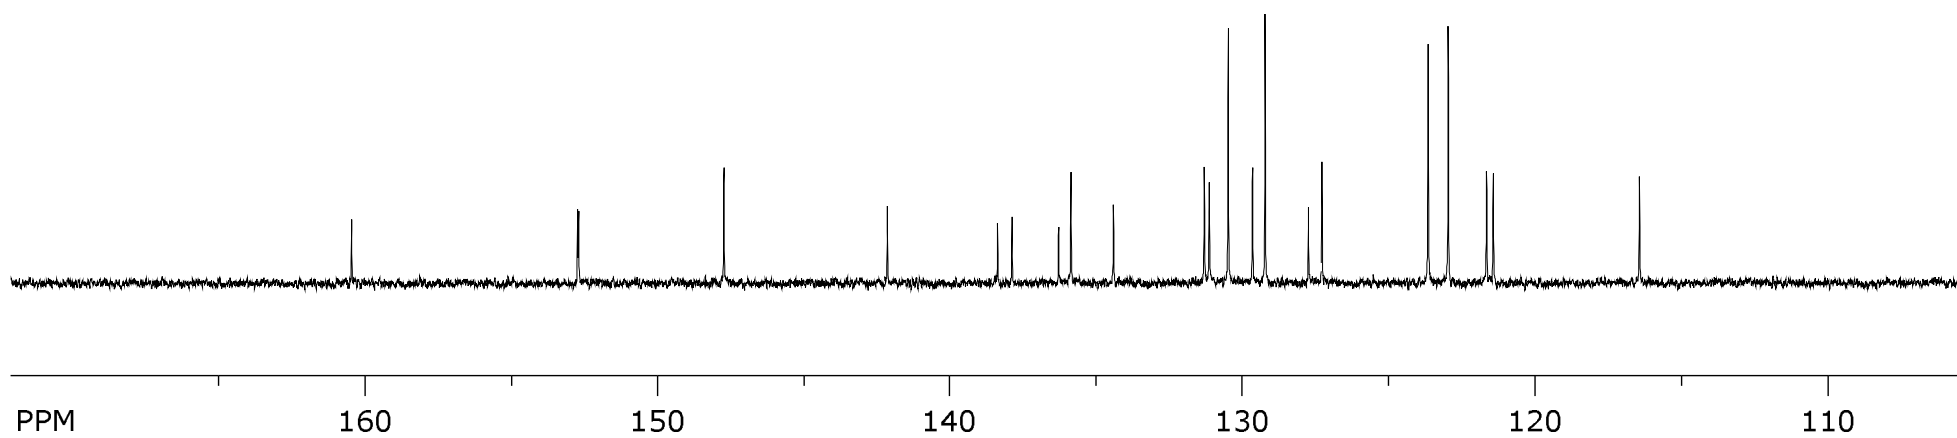

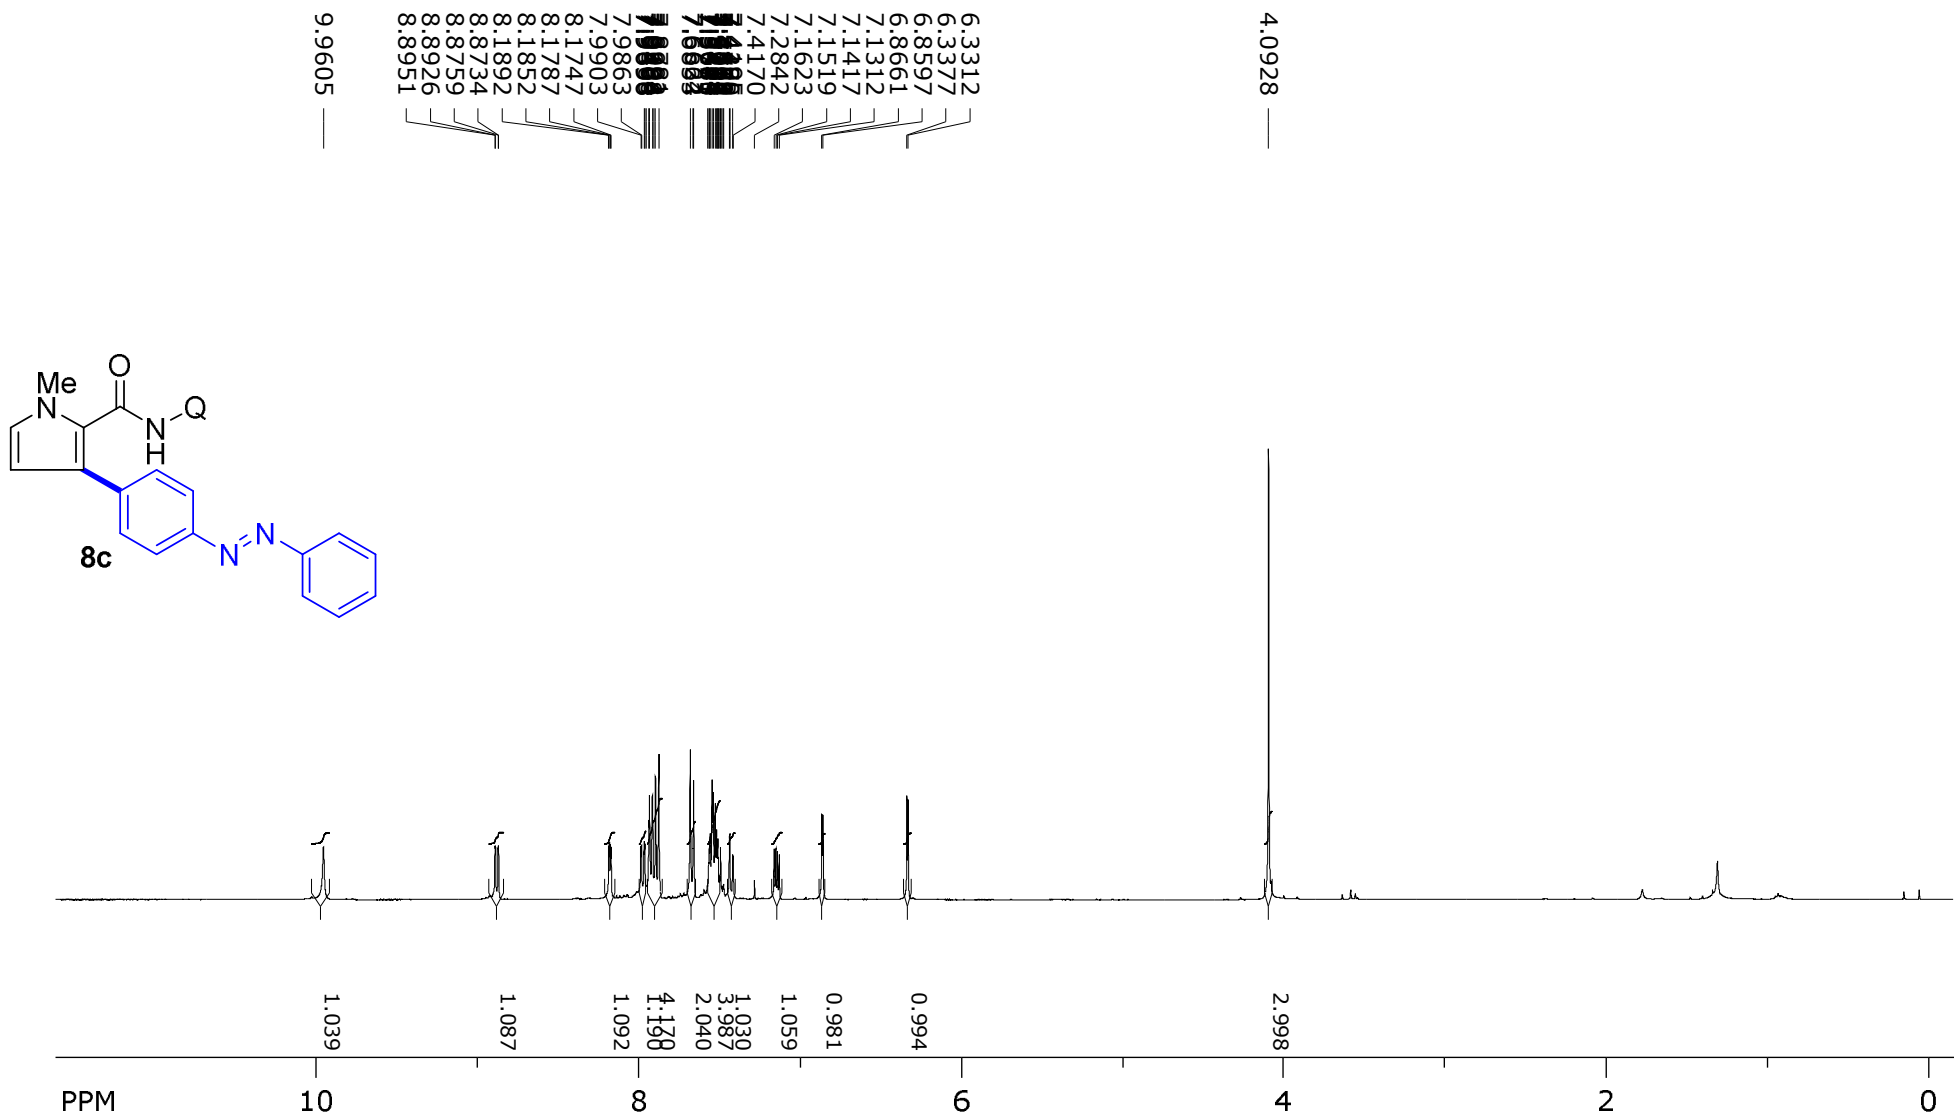

8.8734  
8.8759  
8.8926  
8.8951

8.1747  
8.1787  
8.1852  
8.1892

7.8781  
7.8992  
7.9094  
7.9188  
7.9364  
7.9400  
7.9563  
7.9656  
7.9696  
7.9863  
7.9903

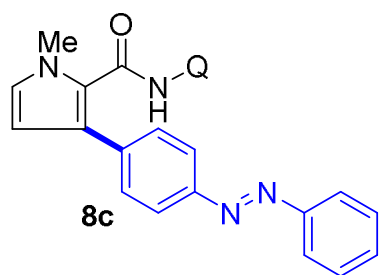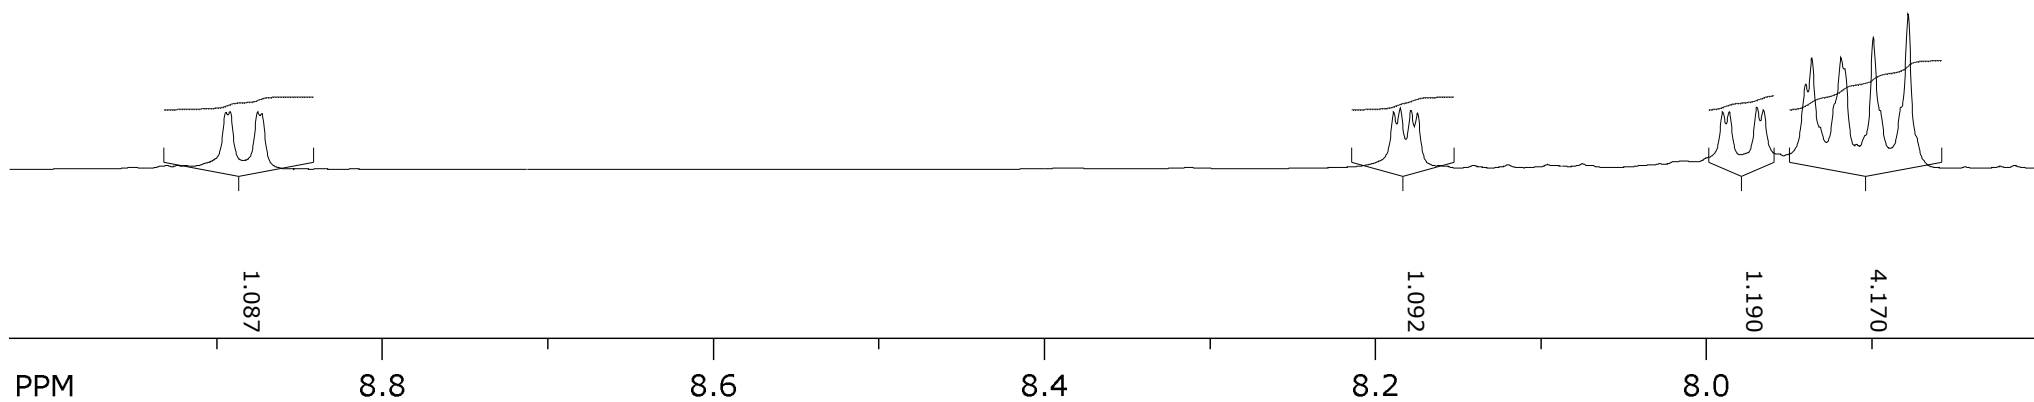

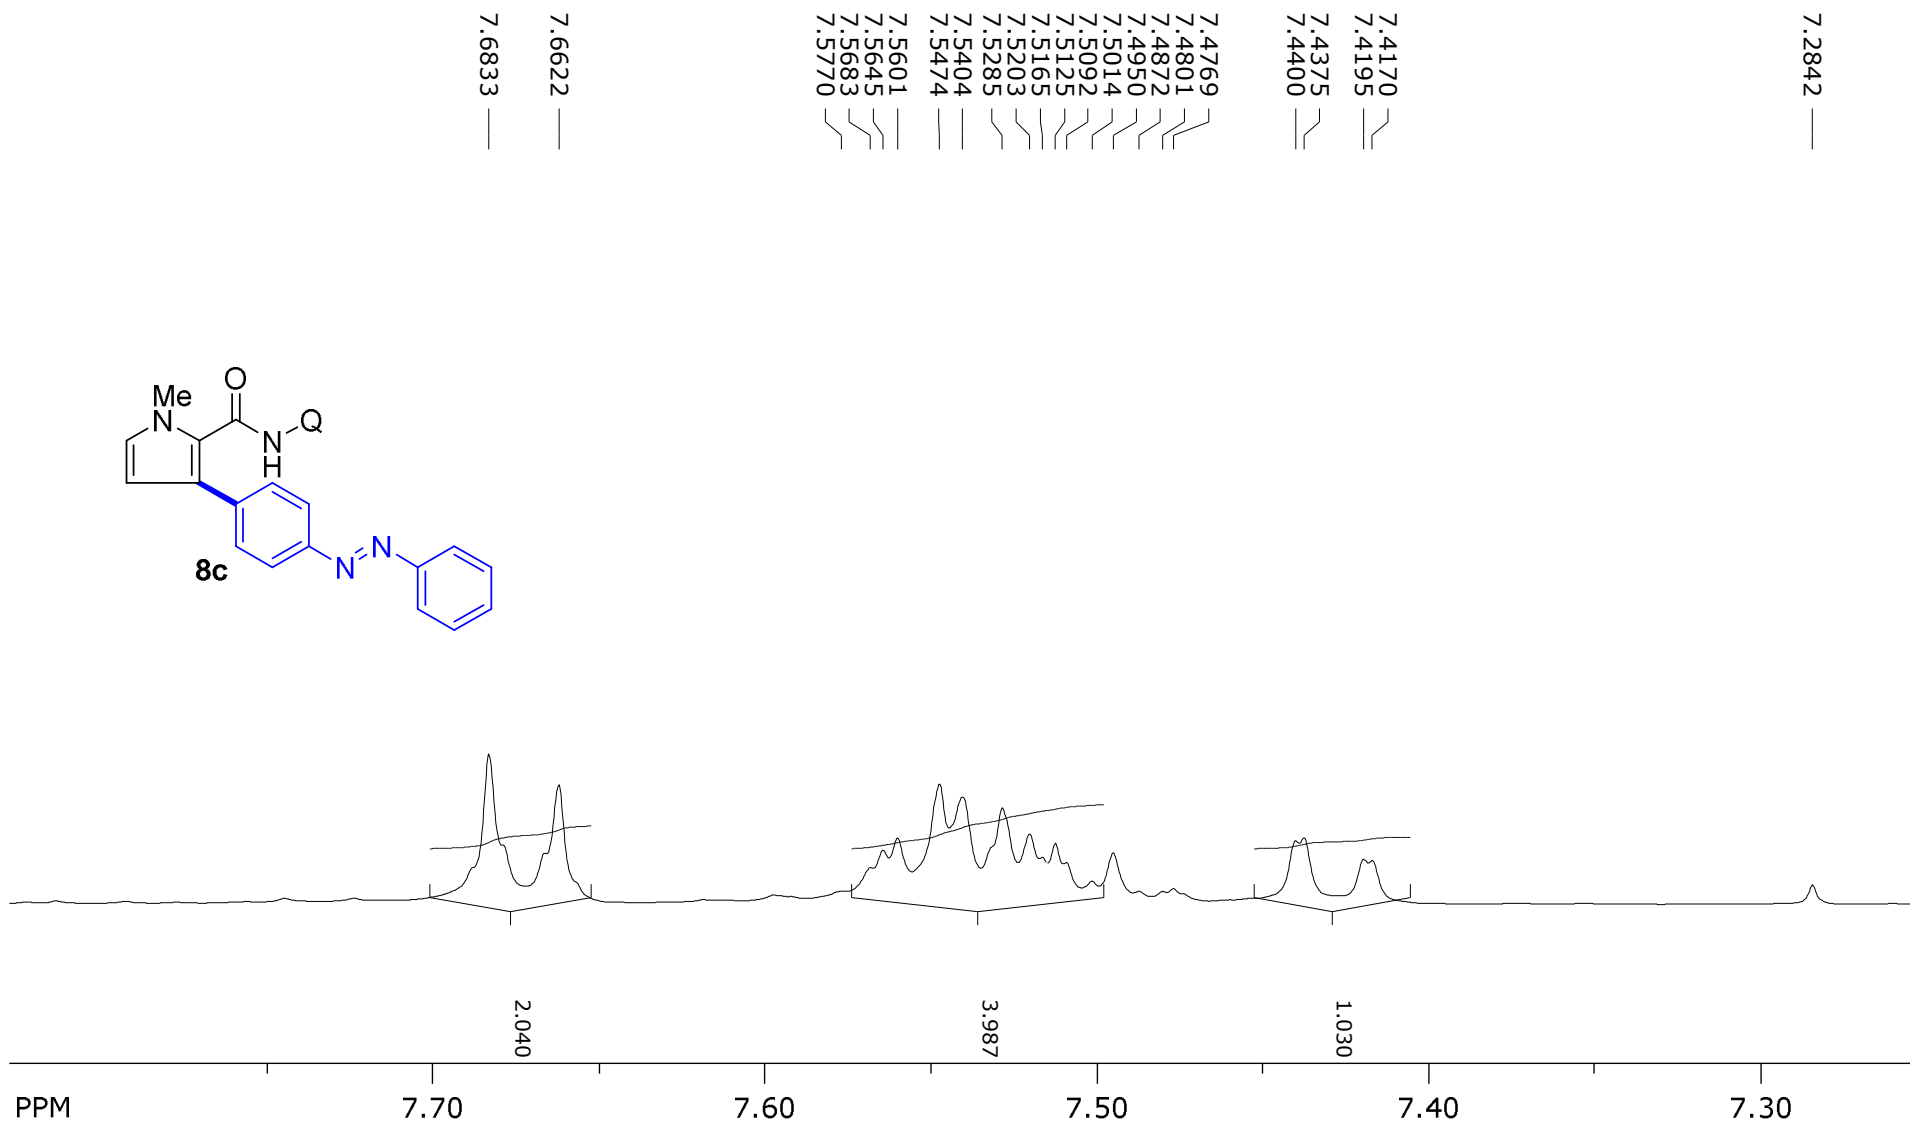



SpinWorks 4: SS-71-P

7.4769  
7.4801  
7.4872  
7.4950  
7.5014  
7.5092  
7.5125  
7.5165  
7.5203  
7.5285  
7.5404  
7.5474  
7.5601  
7.5645  
7.5683  
7.5770

7.4375  
7.4170  
7.4195  
7.4400

7.2842

7.1312  
7.1417  
7.1519  
7.1623

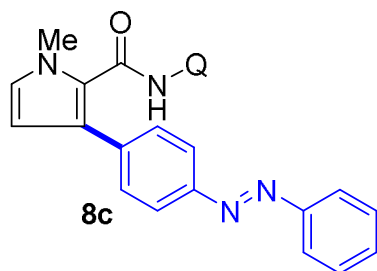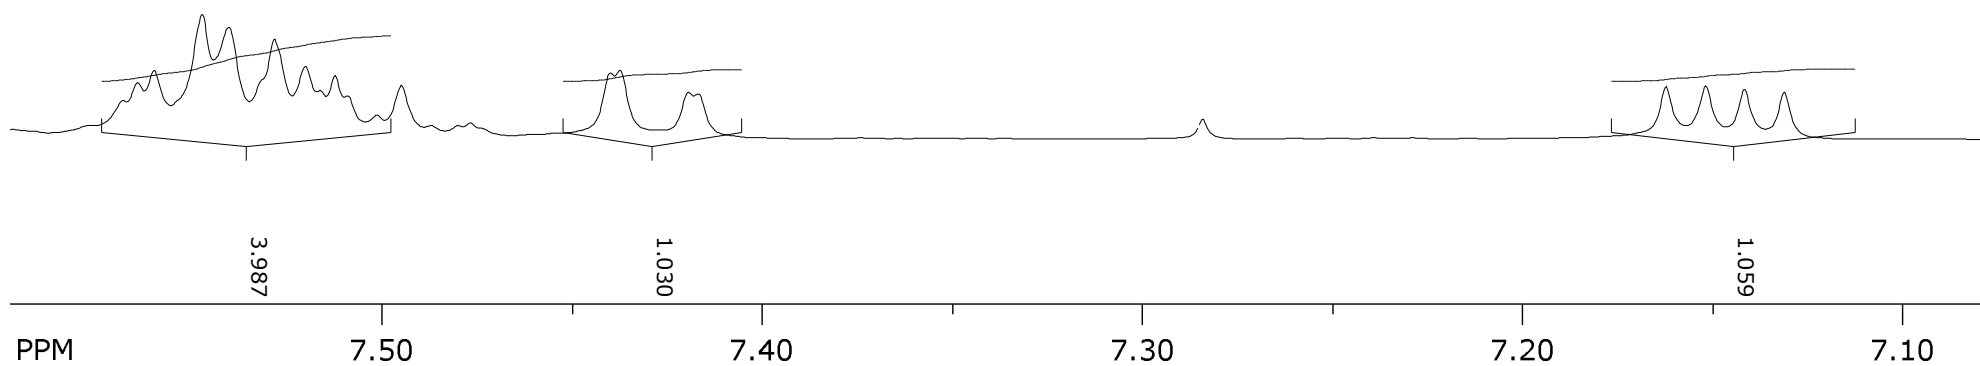

6.8597  
6.8661

6.3312  
6.3377

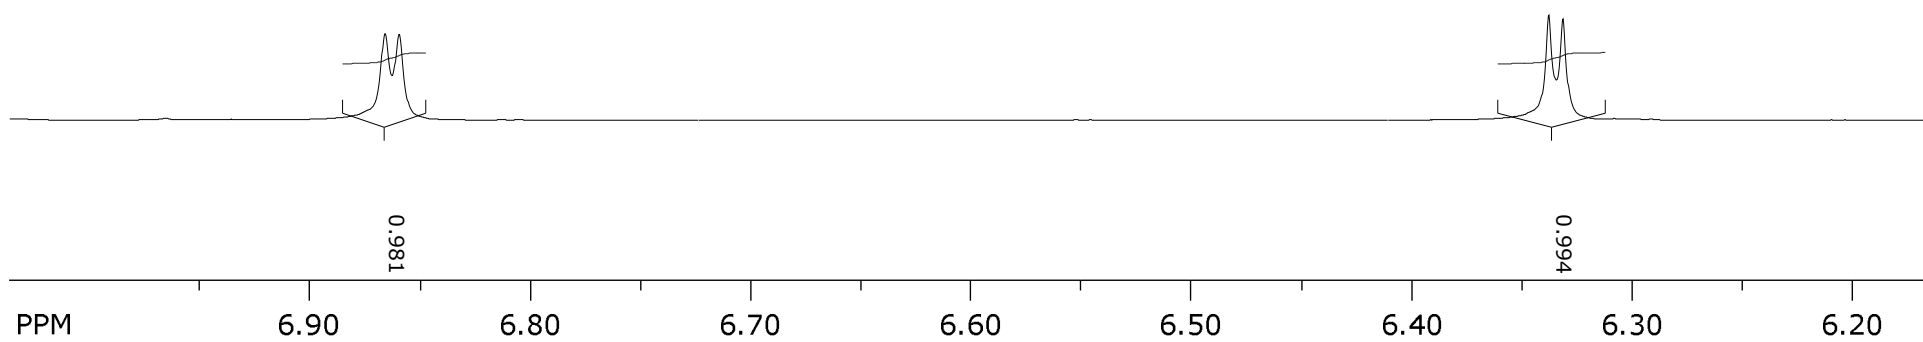

SpinWorks 4: SS 71 P  
C13CPD256 CDCl3 /opt/topspin3.5pl2/nmrdata nmrsu 17

109.451  
115.722  
121.177  
121.294  
122.804  
123.253  
123.859  
127.171  
127.330  
127.812  
128.606  
129.132  
130.493  
130.905  
134.909  
135.740  
138.346  
138.728  
147.638  
151.855  
152.779  
160.332

76.797  
77.115  
77.432

37.256

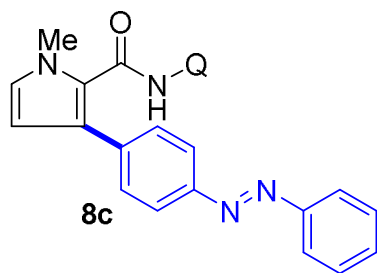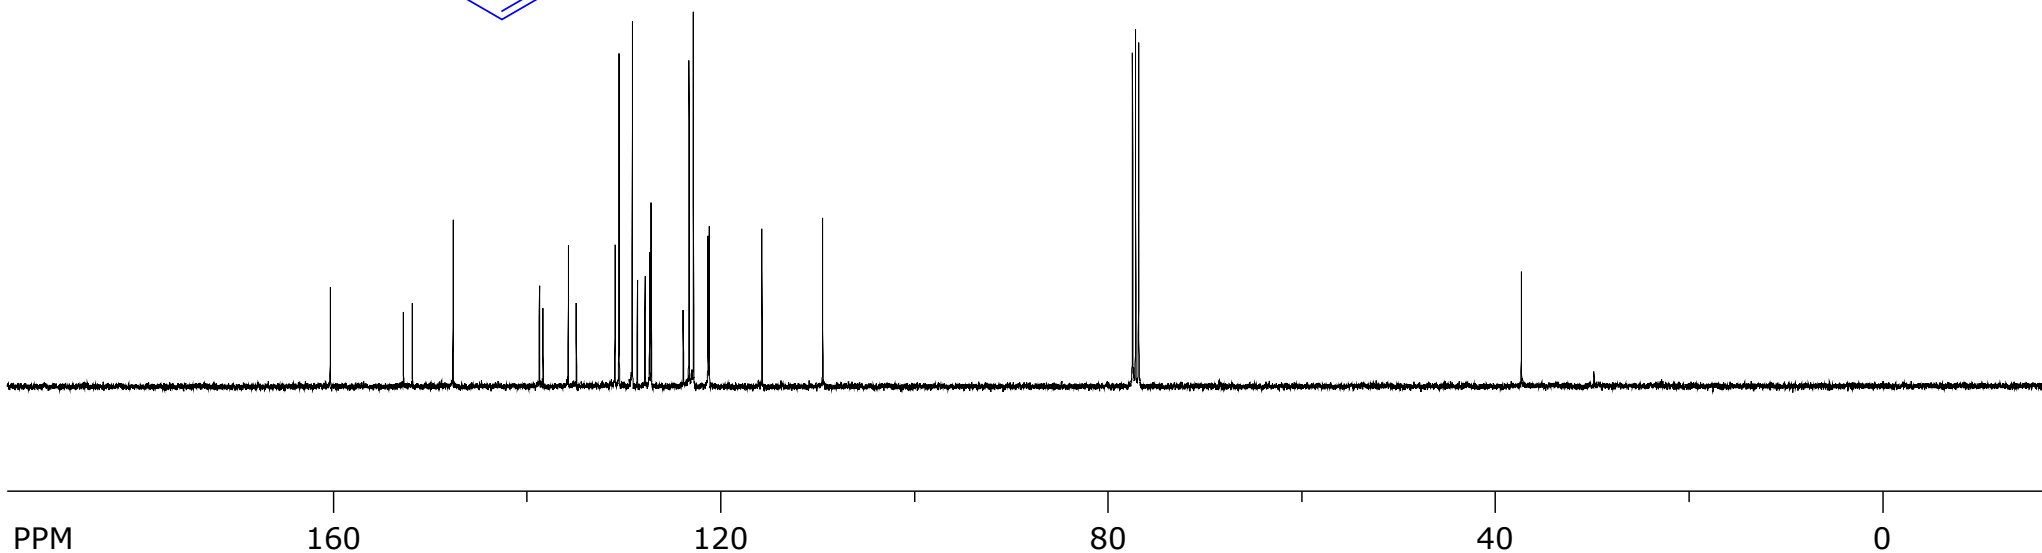

SpinWorks 4: SS 754  
PROTON CDCl3 /opt/topspin3.5pl2/nmrdata nmrsu 3

10.2371  
8.8994  
8.8805  
8.2485  
8.2388  
8.1816  
8.1612  
8.0339  
8.0149  
8.0052  
7.9955  
7.9858  
7.4249  
7.4062  
7.2833  
7.2296  
7.2191  
7.2089  
7.1984

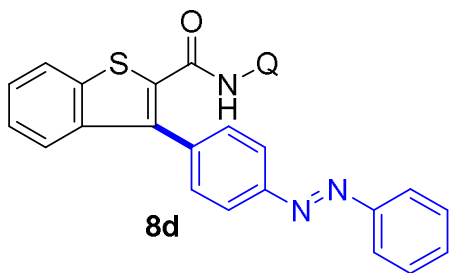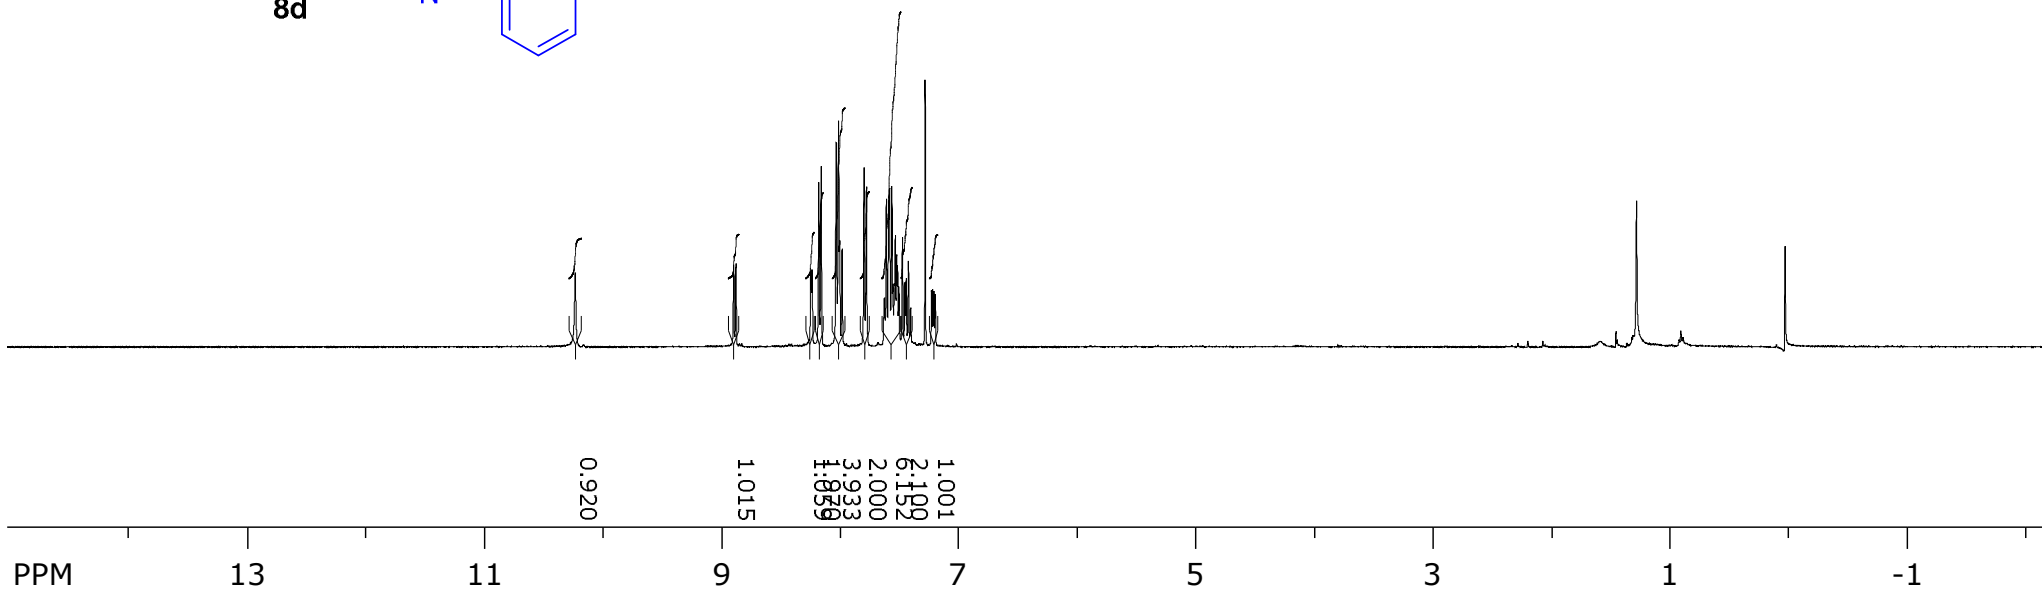

SpinWorks 4: SS 754  
PROTON CDCl3 /opt/topspin3.5pl2/nmrdata nmrsu 3

10.2371

8.8805  
8.8994

8.1612  
8.1816  
8.2388  
8.2485

7.9845  
8.0052  
8.0149  
8.0339

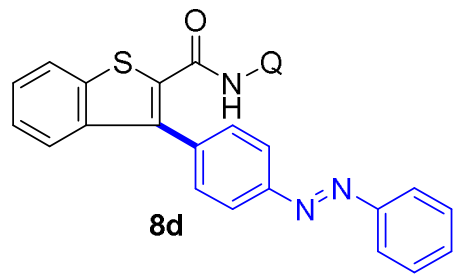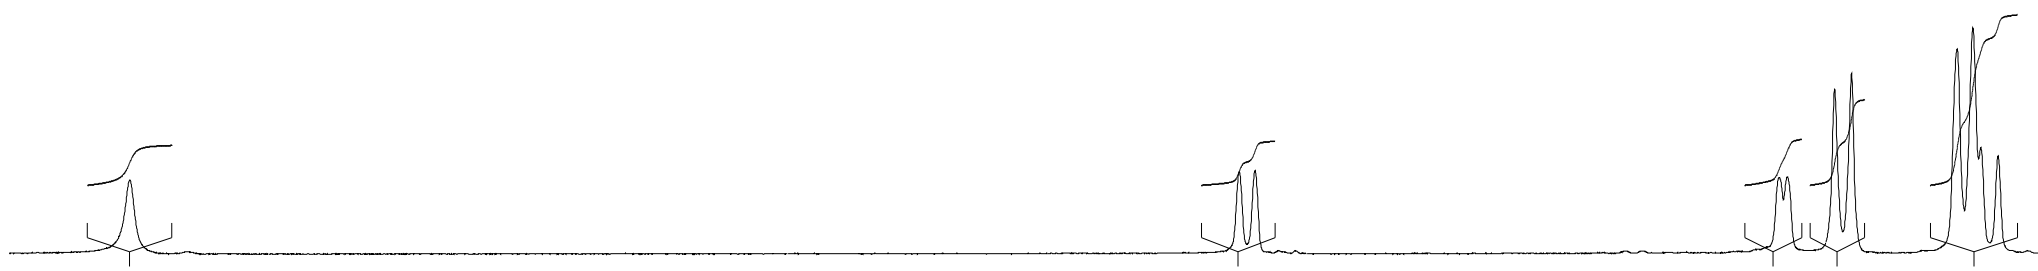

0.920

1.015

1.059

1.970

3.933

PPM 10.0 9.6 9.2 8.8 8.4 8.0

SpinWorks 4: SS 754  
PROTON CDCl3 /opt/topspin3.5pl2/nmrdata nmrsu 3

7.7791  
7.7995

7.6280  
7.6113  
7.5918  
7.5845  
7.5653  
7.5560  
7.5430  
7.5356  
7.5251  
7.5162  
7.5056  
7.4753  
7.4549  
7.4440  
7.4249  
7.4062

7.2833  
7.1984  
7.2089  
7.2191  
7.2296

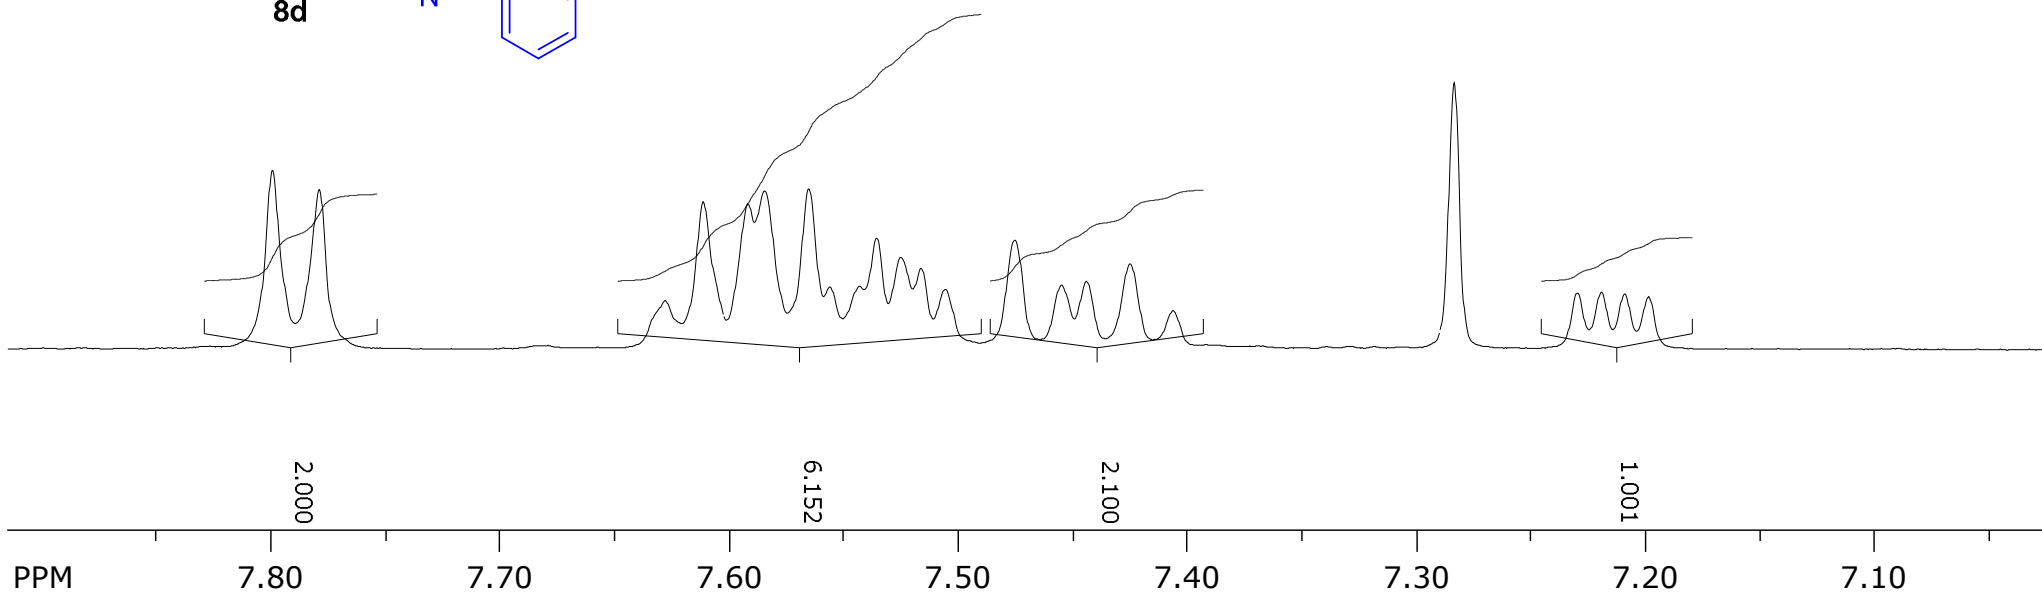

SpinWorks 4: SS-754

C13CPD256 CDCl3 /opt/topspin3.5pl2/nmrdata nmrsu 3

116.633  
121.440  
121.841  
122.634  
123.028  
124.025  
124.699  
124.968  
125.194  
125.224  
131.454  
131.854  
134.864  
135.864  
136.312  
136.964  
137.181  
138.392  
140.190  
140.711  
147.736  
152.720  
153.149  
160.718

76.747  
77.065  
77.383



PPM

160

120

80

40

0

SpinWorks 4: SS-754  
C13CPD256 CDCl3 /opt/topspin3.5pl2/nmrdata nmrsu 3

160.718 —  
152.720 —  
153.149 —  
147.736 —  
140.711 —  
140.190 —  
138.392 —  
137.181 —  
136.964 —  
136.312 —  
135.864 —  
134.352 —  
131.434 —  
131.372 —  
129.272 —  
127.731 —  
127.272 —  
126.737 —  
124.968 —  
124.699 —  
124.025 —  
123.028 —  
122.634 —  
121.841 —  
121.440 —  
116.633 —

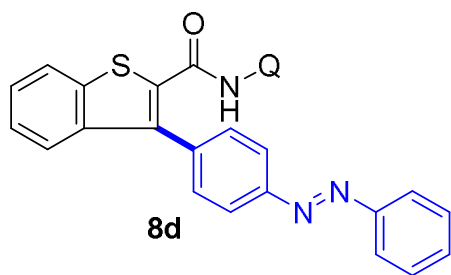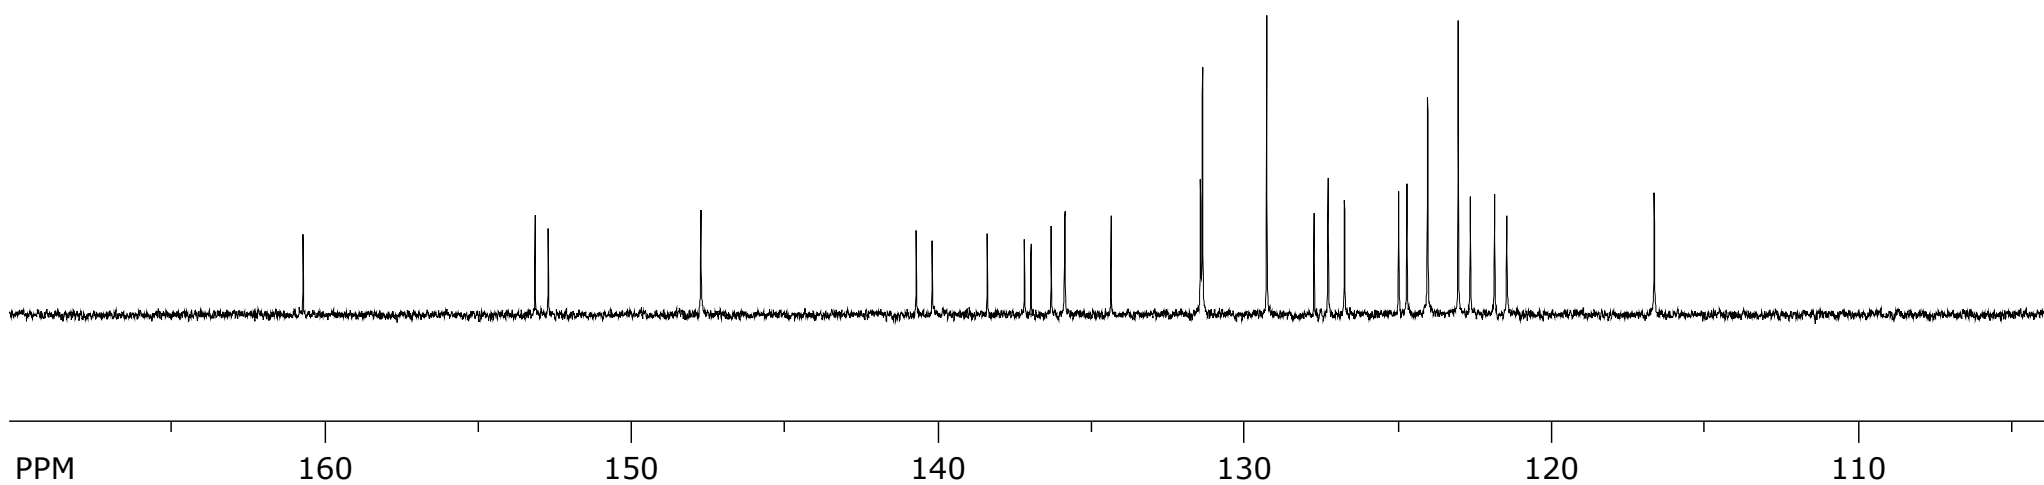



SpinWorks 4: SS 62 (III) P  
PROTON DMSO /opt/topspin3.5pl2/nmrdata nmrsu 13

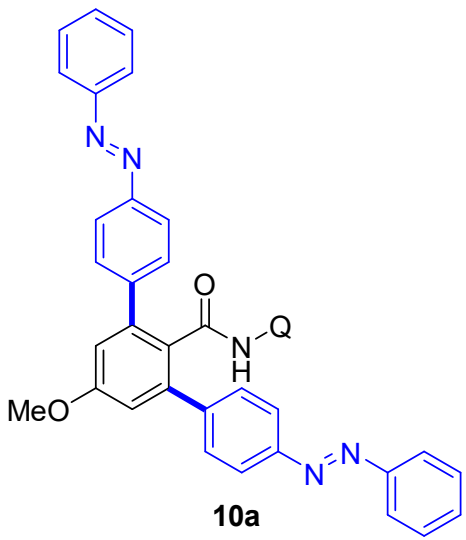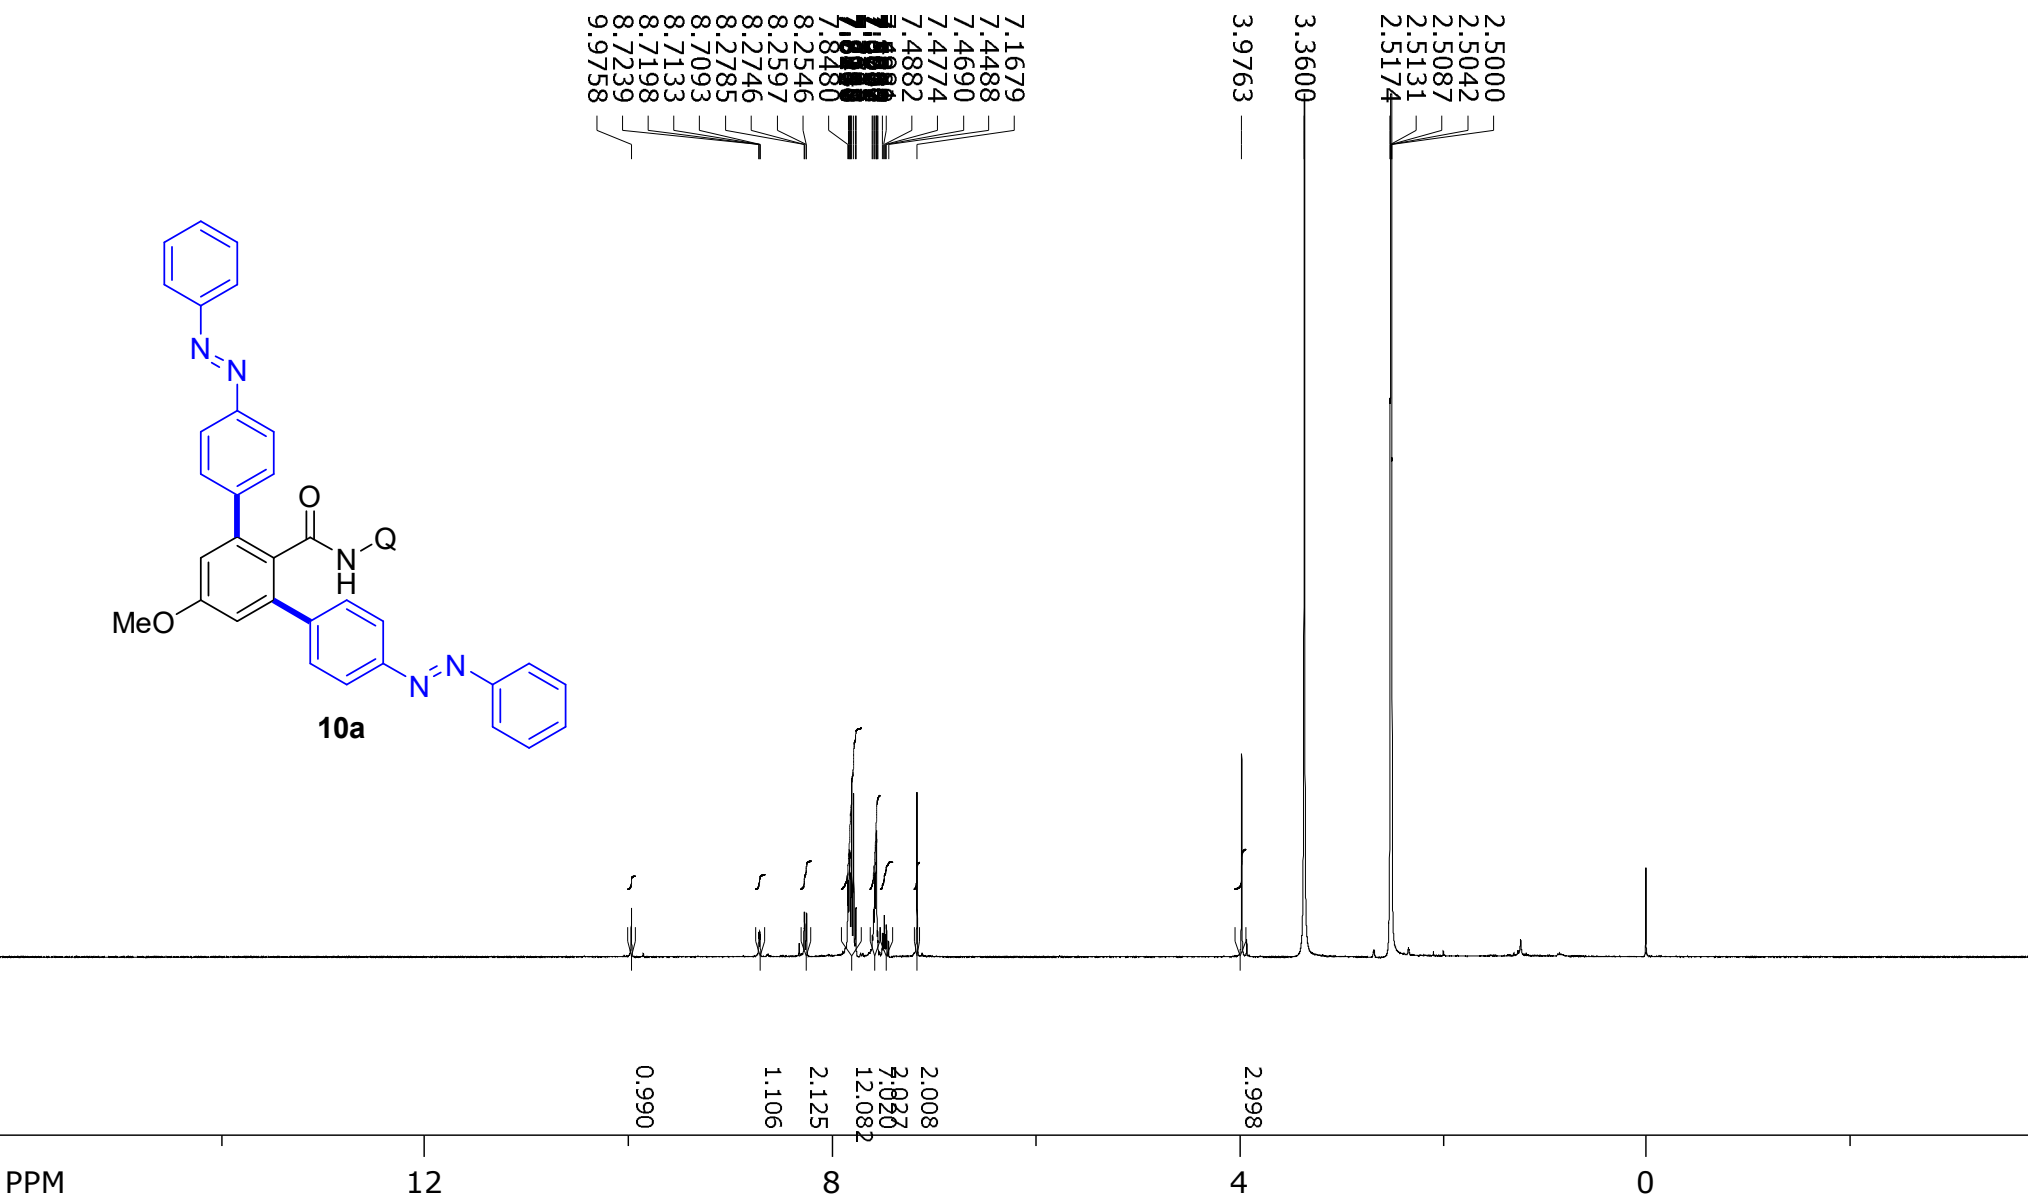

SpinWorks 4: SS 62 (III) P  
PROTON DMSO /opt/topspin3.5pl2/nmrdata nmrsu 13

8.7093  
8.7133  
8.7198  
8.7239

8.2546  
8.2597  
8.2746  
8.2785

7.7693  
7.7743  
7.7910  
7.8097  
7.8148  
7.8241  
7.8280  
7.8315  
7.8426  
7.8480

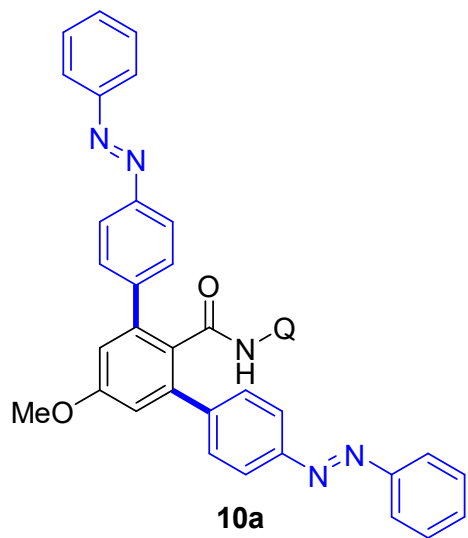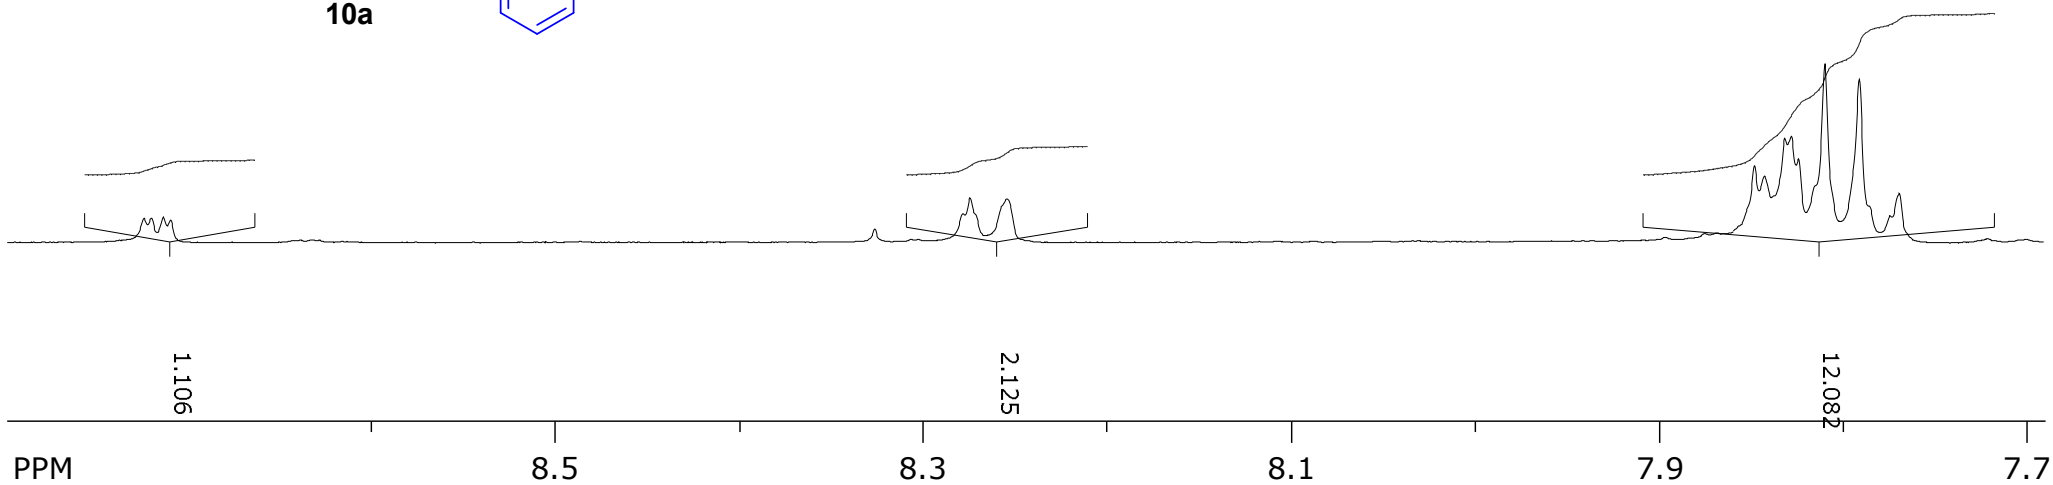

SpinWorks 4: SS 62 (III) P  
PROTON DMSO /opt/topspin3.5pl2/nmrdata nmrsu 13

7.5518  
7.5562  
7.5657  
7.5680  
7.5737  
7.5842  
7.5927  
7.6017  
7.6063

7.4488  
7.4690  
7.4774  
7.4882  
7.4981  
7.5088

7.1679

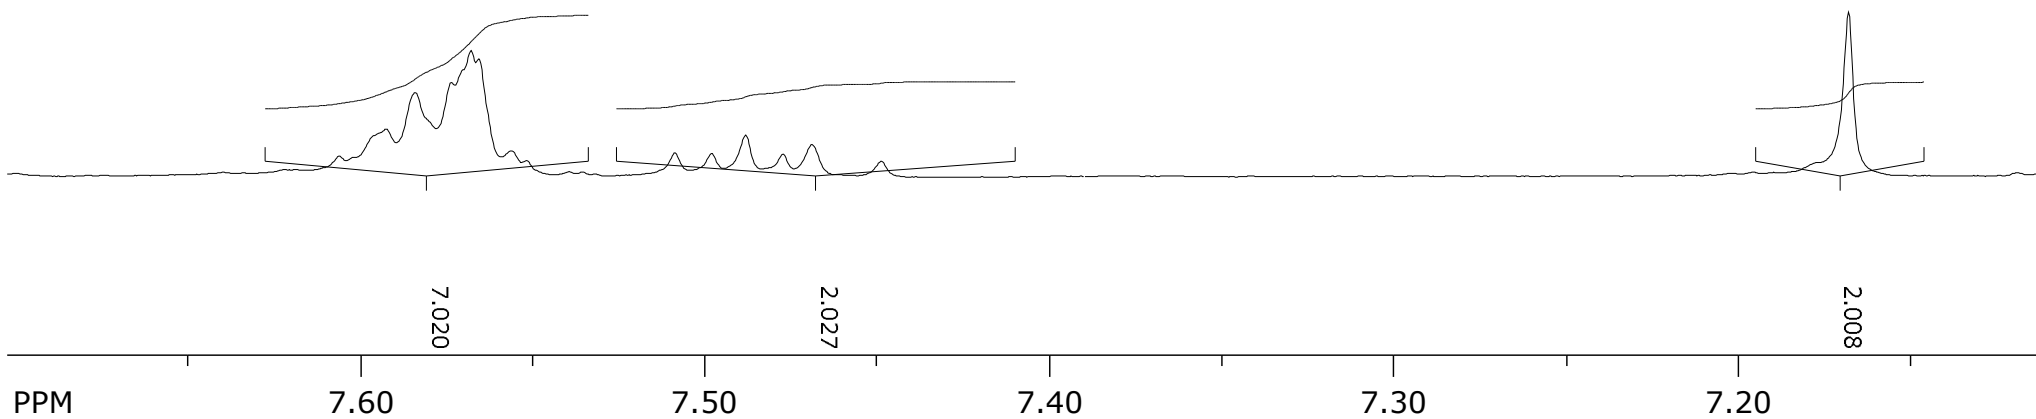

SpinWorks 4: SS 62 III P  
C13CPD DMSO /opt/topspin3.5pl2/nmrdata nmrsu 24

114.984  
116.782  
121.977  
122.355  
122.914  
126.749  
128.772  
129.450  
129.665  
131.589  
133.849  
136.322  
138.086  
140.783  
143.111  
148.804  
151.043  
151.897  
159.462  
166.573

38.894  
39.102  
39.311  
39.520  
39.728  
39.937  
40.146  
55.681

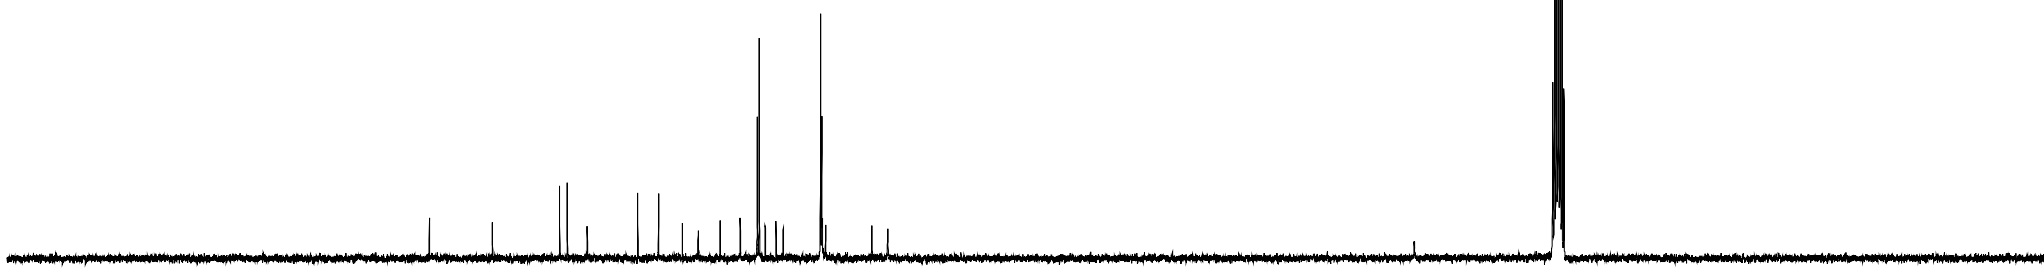

PPM

160

120

80

40

0

SpinWorks 4: SS 62 III P  
C13CPD DMSO /opt/topspin3.5pl2/nmrdata nmrsu 24

166.573 —  
159.462 —  
151.043 —  
151.897 —  
148.804 —  
143.111 —  
140.783 —  
138.086 —  
136.322 —  
133.849 —  
131.589 —  
129.665 —  
129.450 —  
128.772 —  
127.552 —  
126.749 —  
122.554 —  
122.416 —  
122.355 —  
121.977 —  
116.782 —  
114.984 —

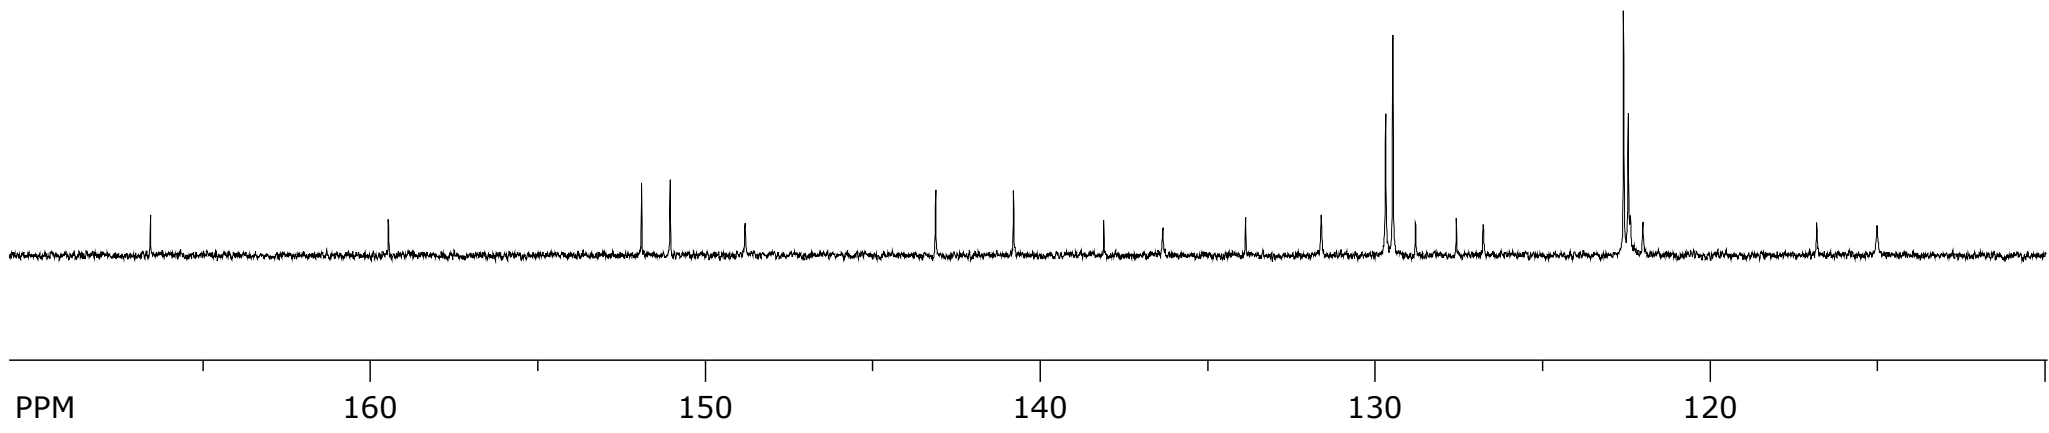

SpinWorks 4: SS-69-III  
PROTON CDCl3 /opt/topspin3.5pl2/nmrdata nmrsu 53

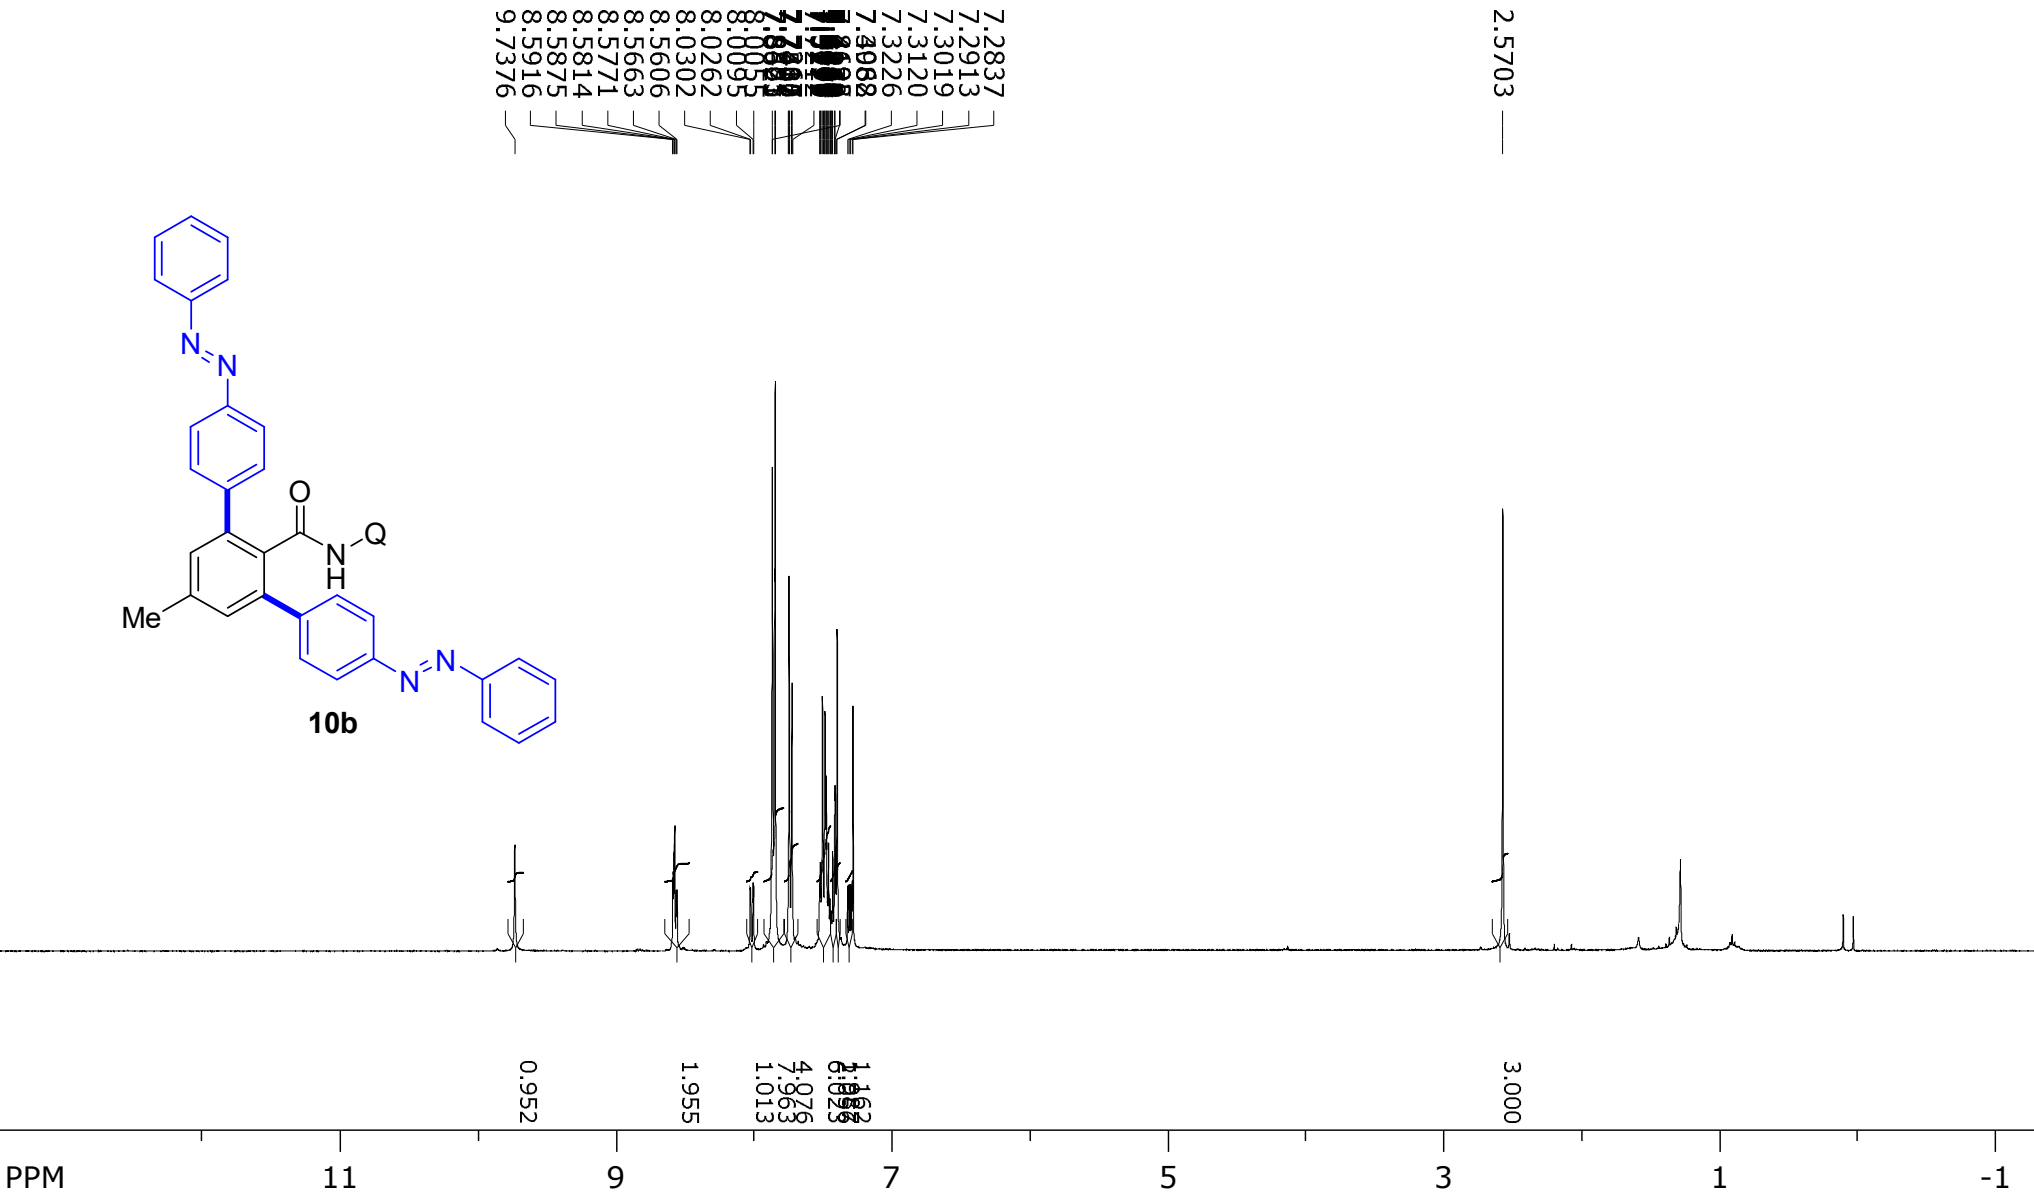

SpinWorks 4: SS-69-III  
PROTON CDCl3 /opt/topspin3.5pl2/nmrdata nmrsu 53

9.7376 —

8.5606  
8.5663  
8.5771  
8.5814  
8.5875  
8.5916

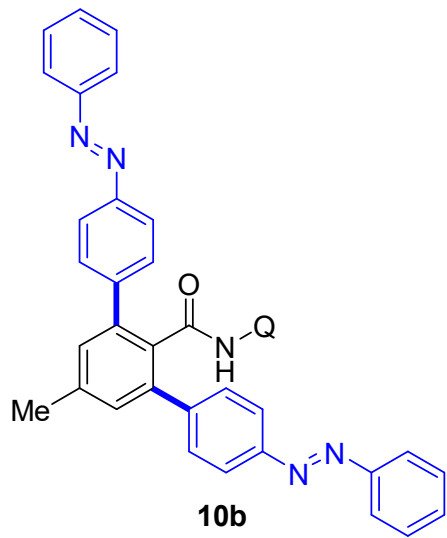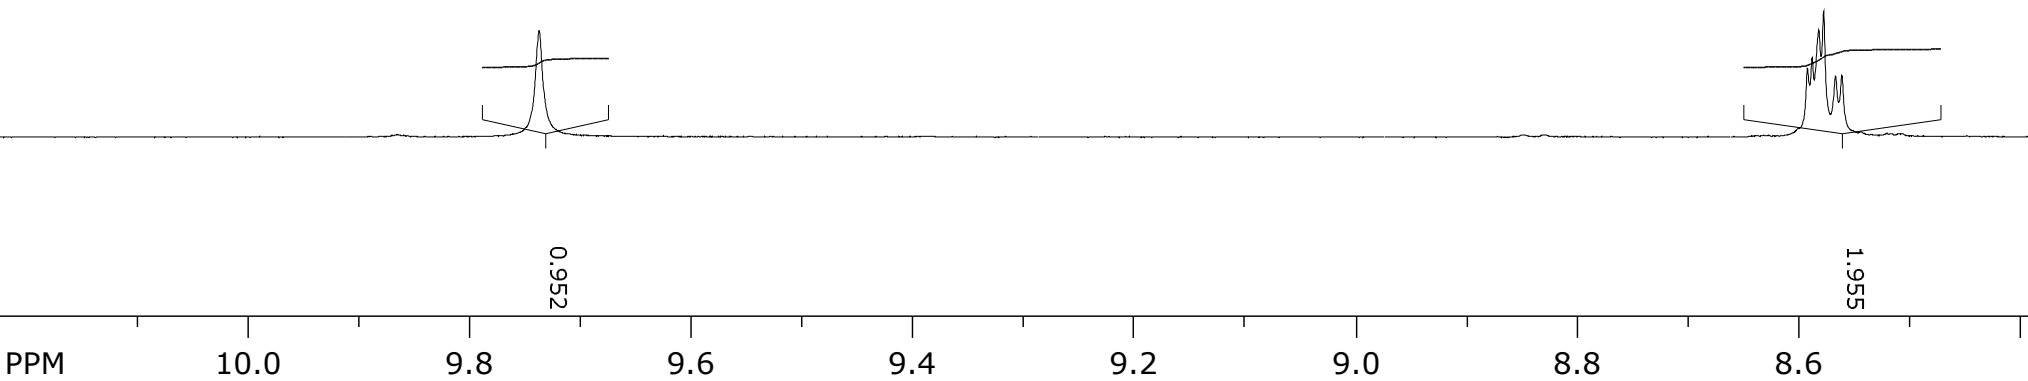

0.952

1.955

PPM

10.0

9.8

9.6

9.4

9.2

9.0

8.8

8.6

SpinWorks 4: SS-69-III  
PROTON CDCl3 /opt/topspin3.5pl2/nmrdata nmrsu 53

8.0262  
8.0302

8.0055  
8.0095

7.8693

7.8485  
7.8521

7.7435  
7.7480  
7.7532

7.7212  
7.7267  
7.7311

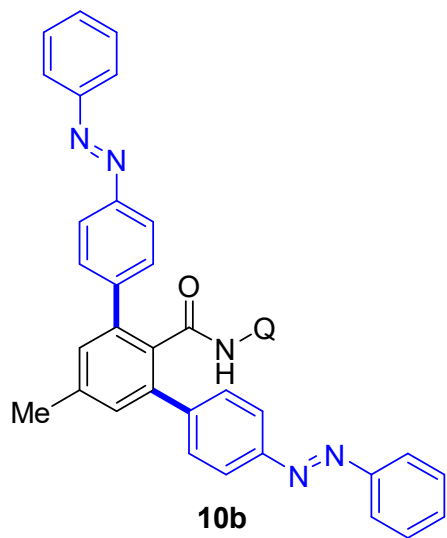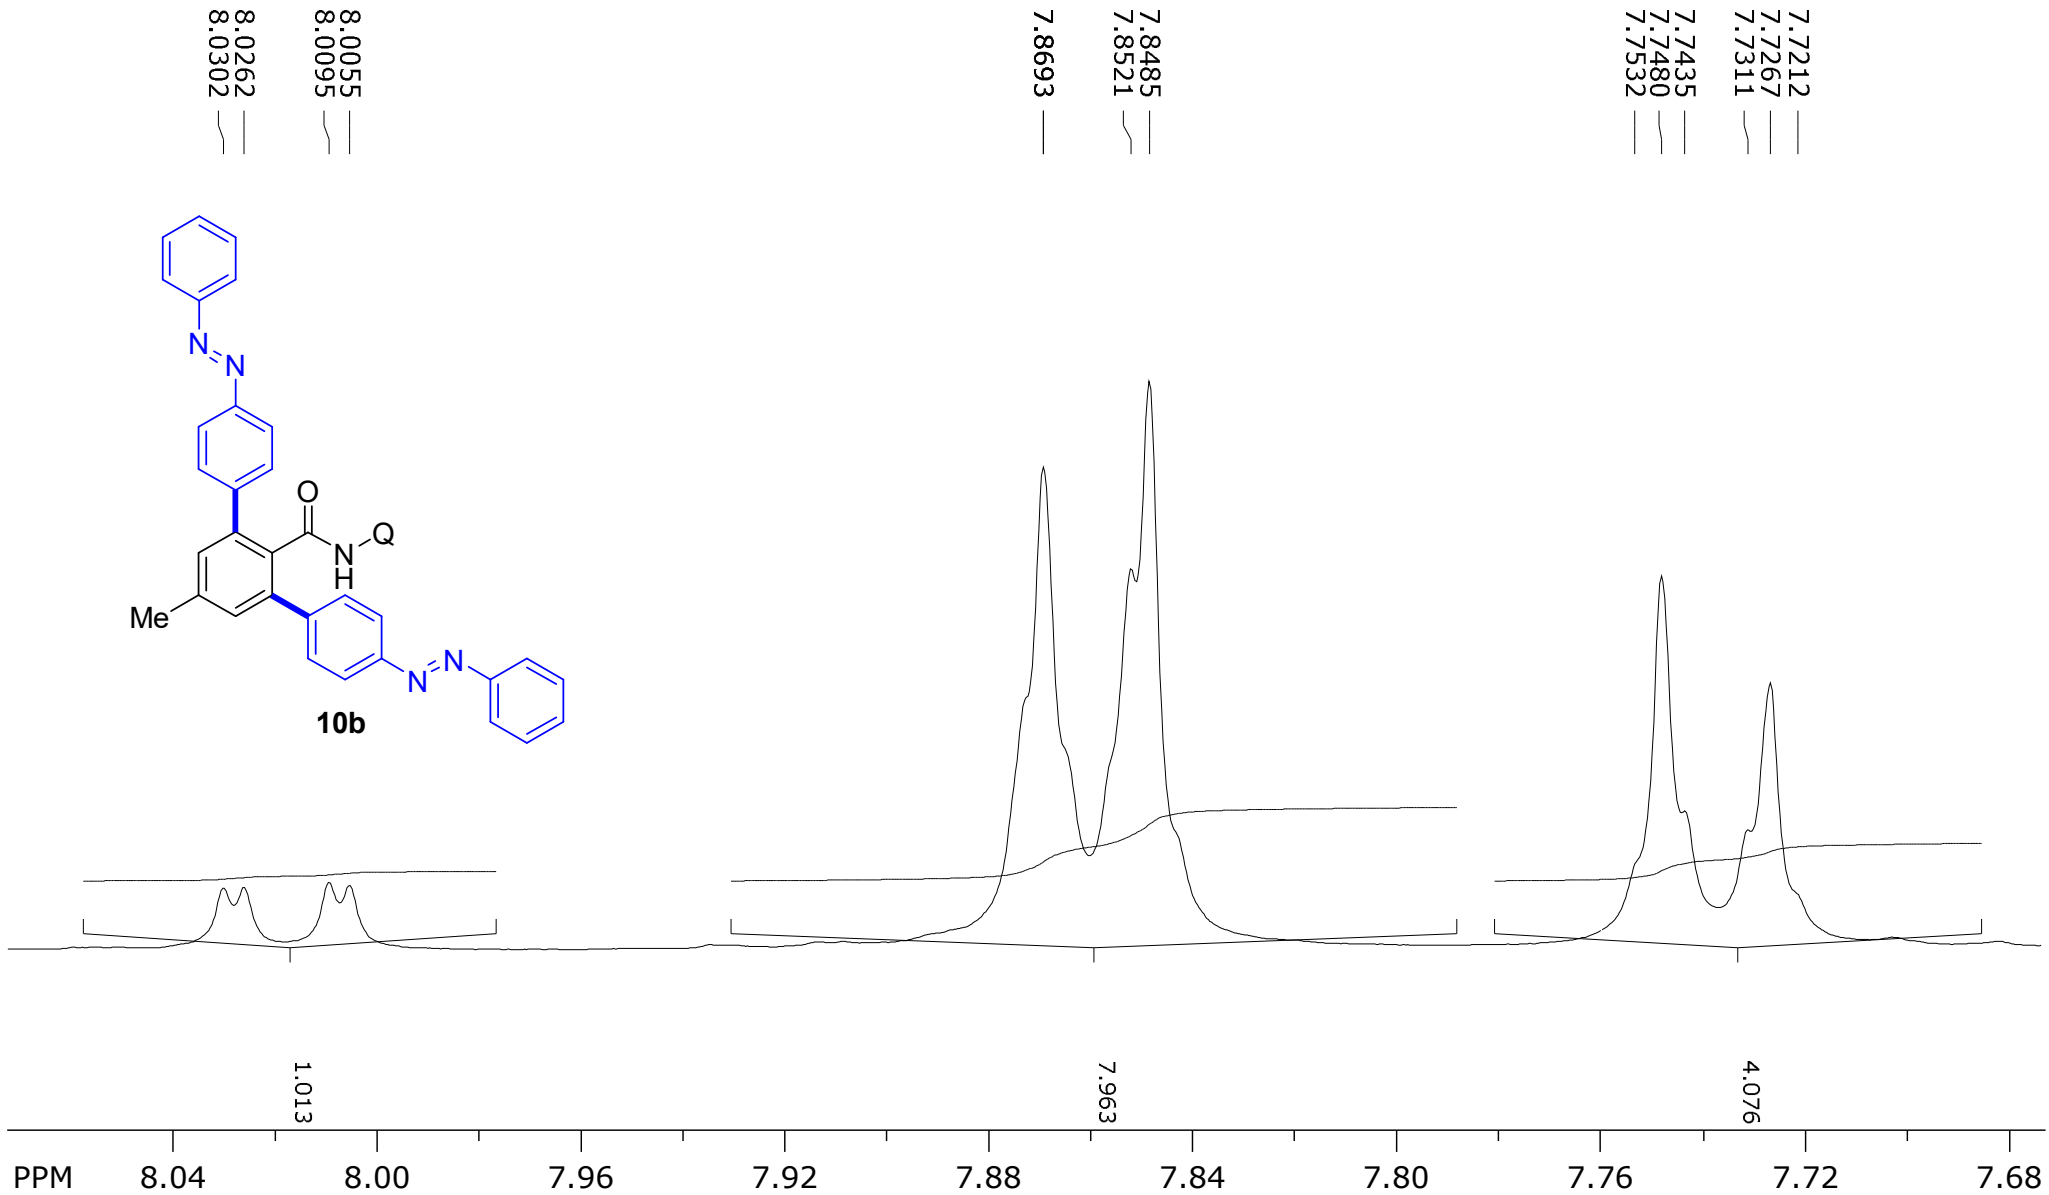



SpinWorks 4: SS-69-III  
PROTON CDCl3 /opt/topspin3.5pl2/nmrdata nmrsu 53

7.5272  
7.5220  
7.5175  
7.5057  
7.4996  
7.4903  
7.4869  
7.4785  
7.4747  
7.4685  
7.4614  
7.4522  
7.4469  
7.4434  
7.4400  
7.4316  
7.4174  
7.4149  
7.4125  
7.4062  
7.3988  
7.3226  
7.3120  
7.3019  
7.2913  
7.2837

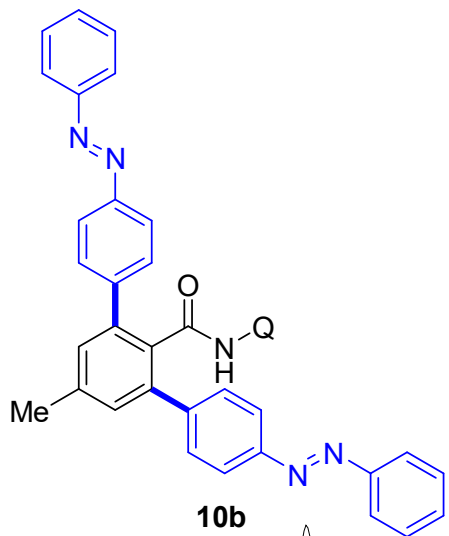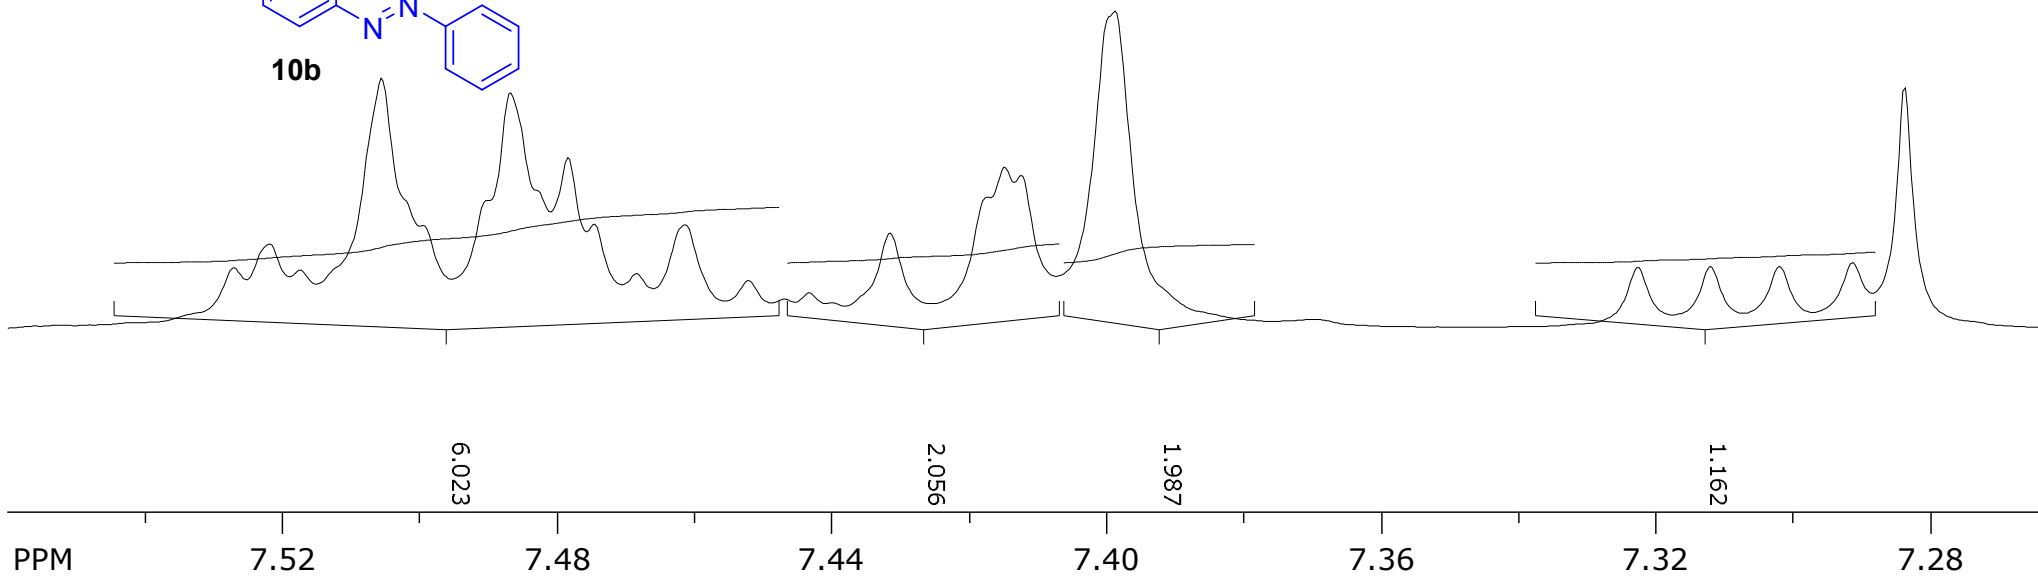

SpinWorks 4: ss 69-ii-p

13c

C13CPD256 CDCl3 /opt/topspin3.5pl2/nmrdata/nmrdata

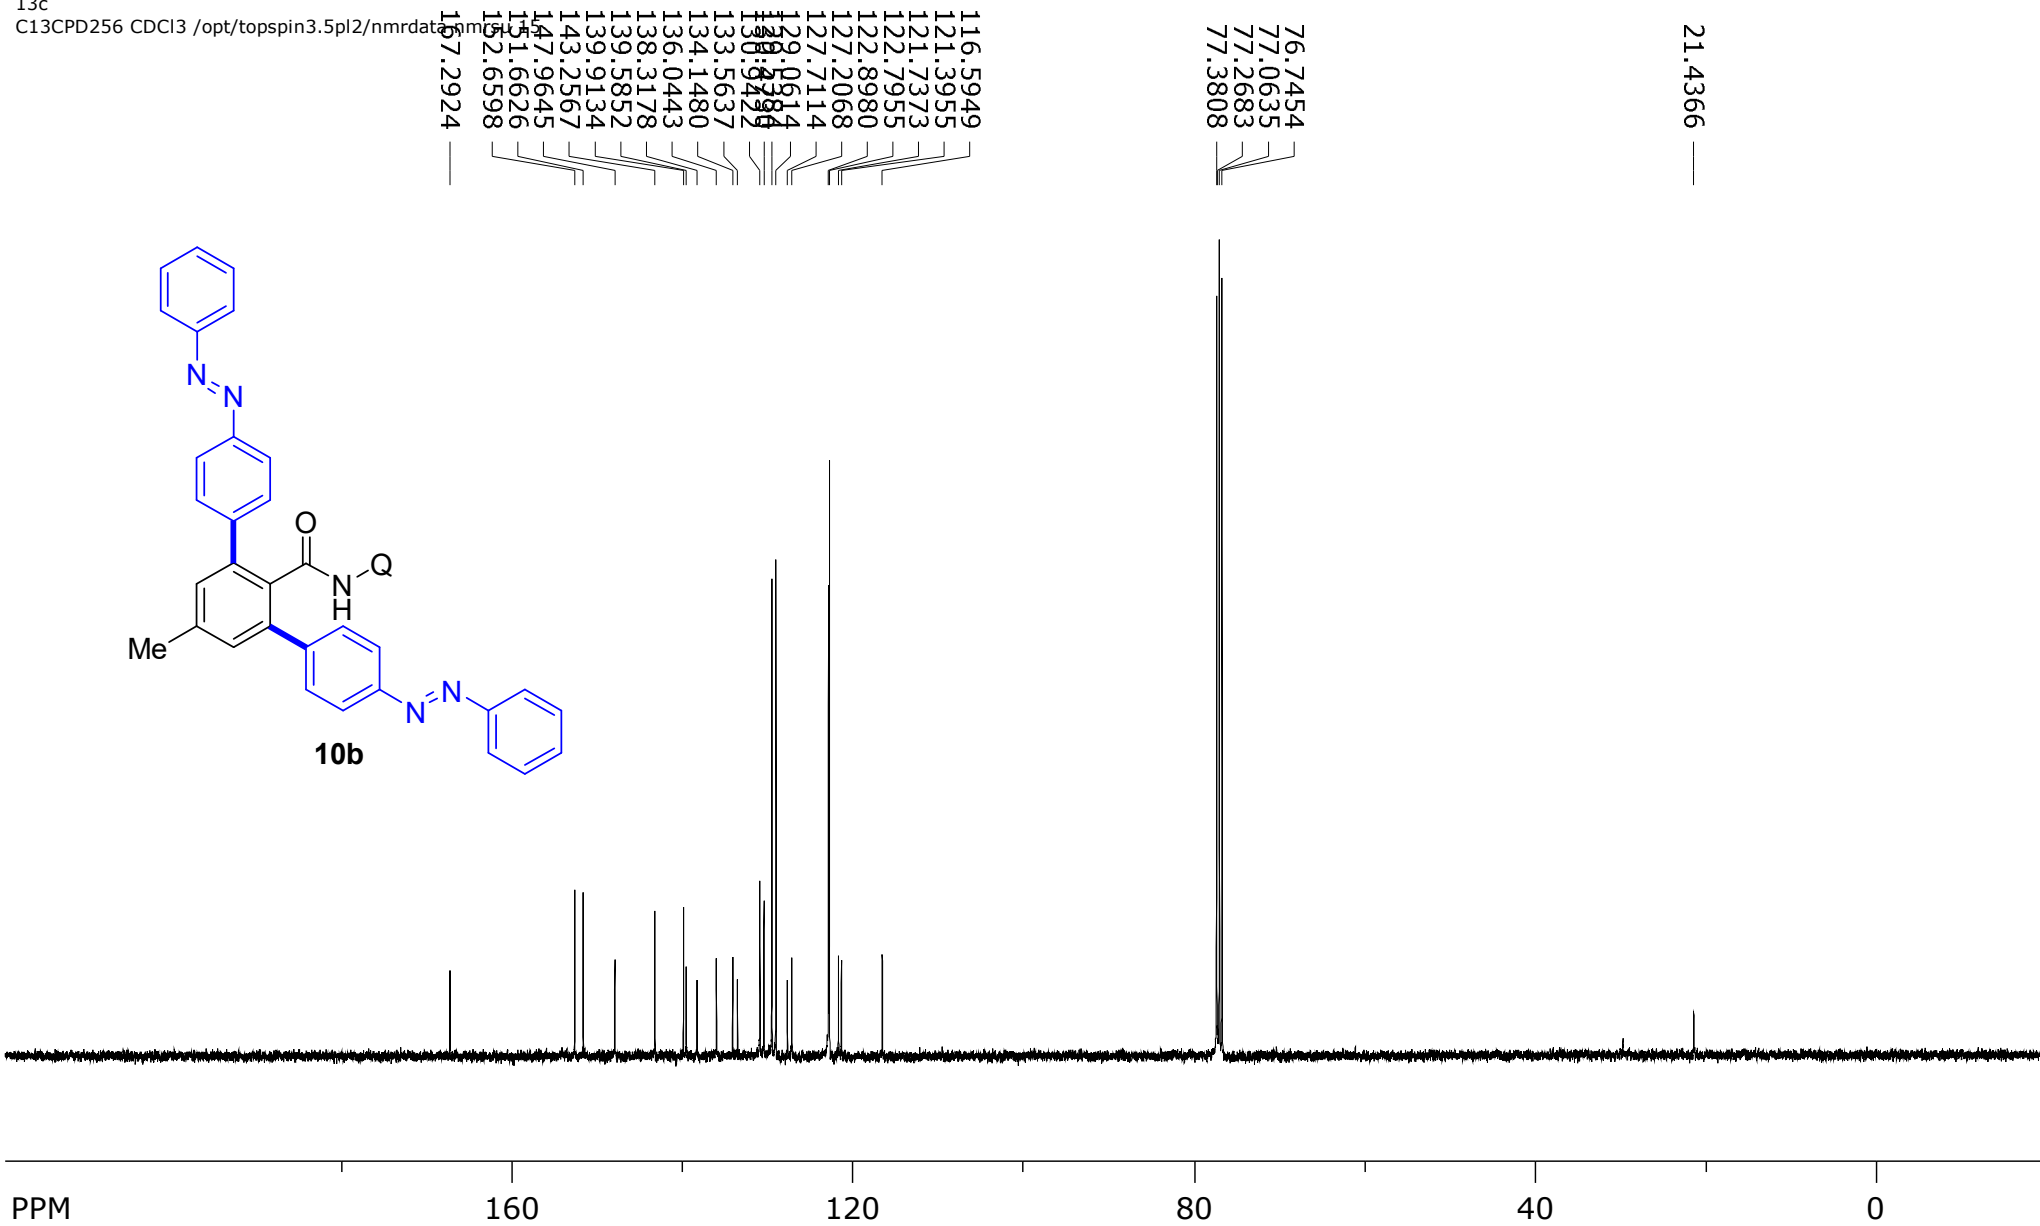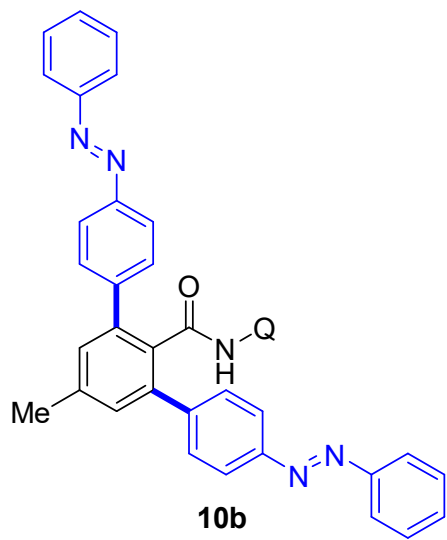

SpinWorks 4: ss 69-ii-p

13c

C13CPD256 CDCl3 /opt/topspin3.5pl2/nmrdata nmrsu 15

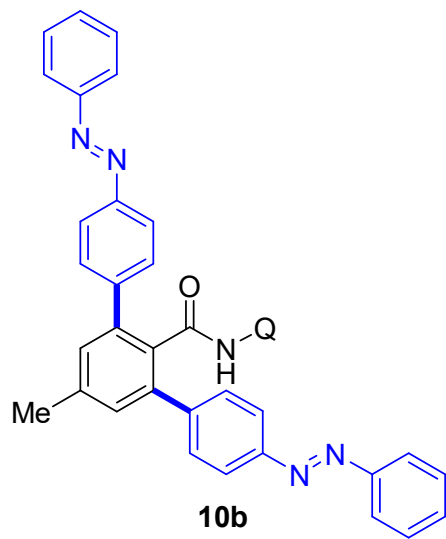

187.2924

151.6626  
152.6598

147.9645

143.2567

139.5852  
139.9134

138.3178

136.0443

133.5637  
134.1480

130.9422

130.4730

129.5384

127.7114

127.2068

122.8980

122.7955

121.7373

121.3955

116.5949

PPM

160

150

140

130

120

110

SpinWorks 4: SS-772  
PROTON CDCl3 /opt/topspin3.5pl2/nmrdata nmrsu 57

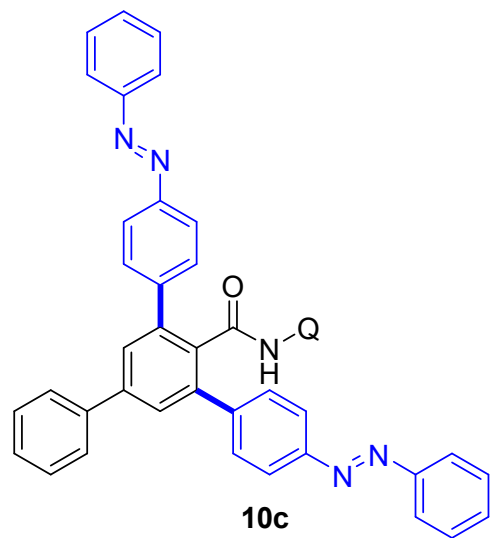

10c

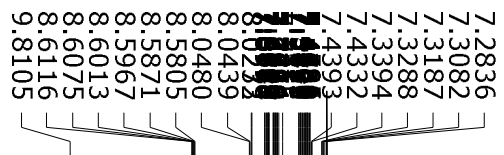

PPM

12

8

4

0

SpinWorks 4: SS-772  
PROTON CDCl3 /opt/topspin3.5pl2/nmrdata nmrsu 57

8.5805  
8.5871  
8.5967  
8.6013  
8.6075  
8.6116

8.0232  
8.0273  
8.0439  
8.0480

9.8105

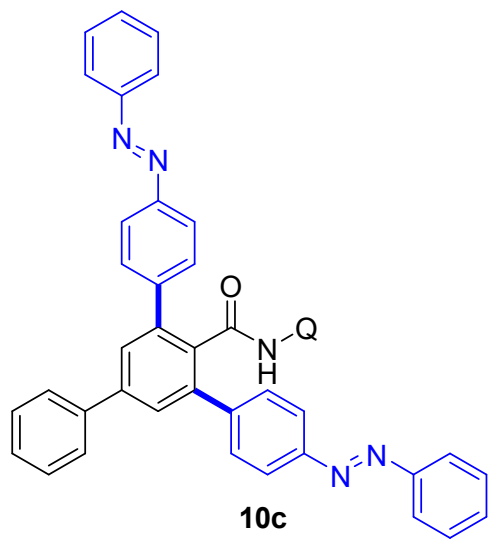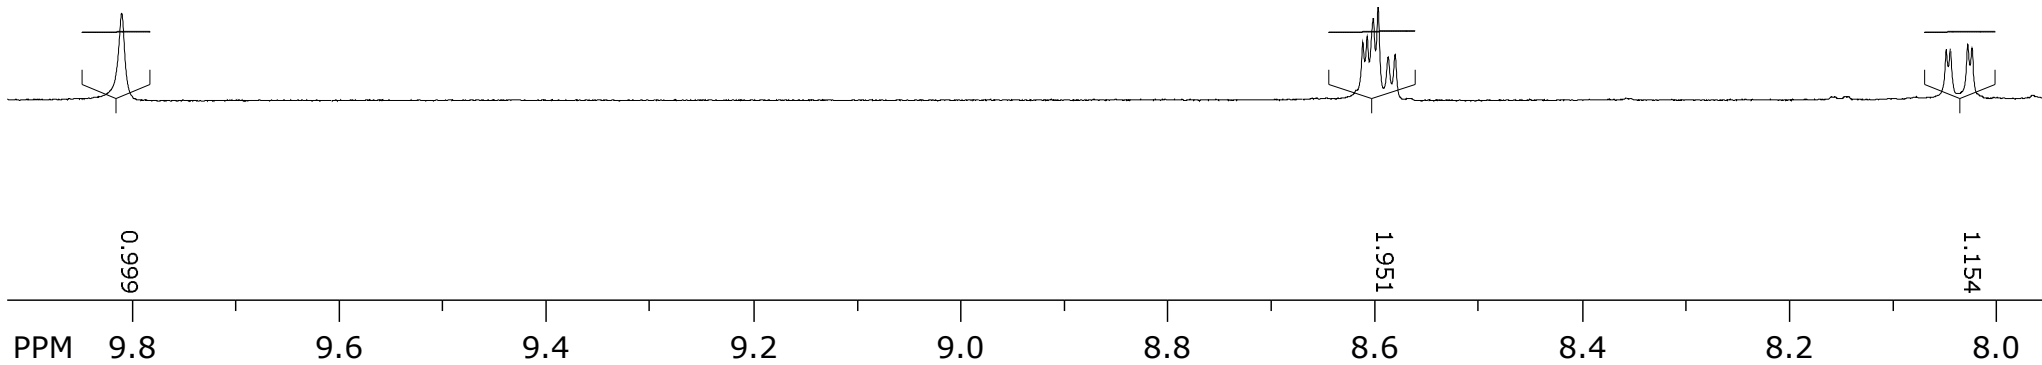

SpinWorks 4: SS-772  
PROTON CDCl3 /opt/topspin3.5pl2/nmrdata nmrsu 57

7.8505  
7.8576  
7.8608  
7.8649  
7.8731  
7.8779  
7.8817  
7.8948  
7.8994

7.8155  
7.8103  
7.8056  
7.7988  
7.7940  
7.7889  
7.7786  
7.7751  
7.7704  
7.7574

7.7215

7.5266  
7.5322  
7.5425  
7.5455  
7.5591  
7.5635  
7.5107  
7.5045  
7.4956  
7.4920  
7.4841  
7.4803  
7.4743  
7.4666  
7.4586  
7.4495  
7.4393  
7.4332

7.3082  
7.3187  
7.3288  
7.3394

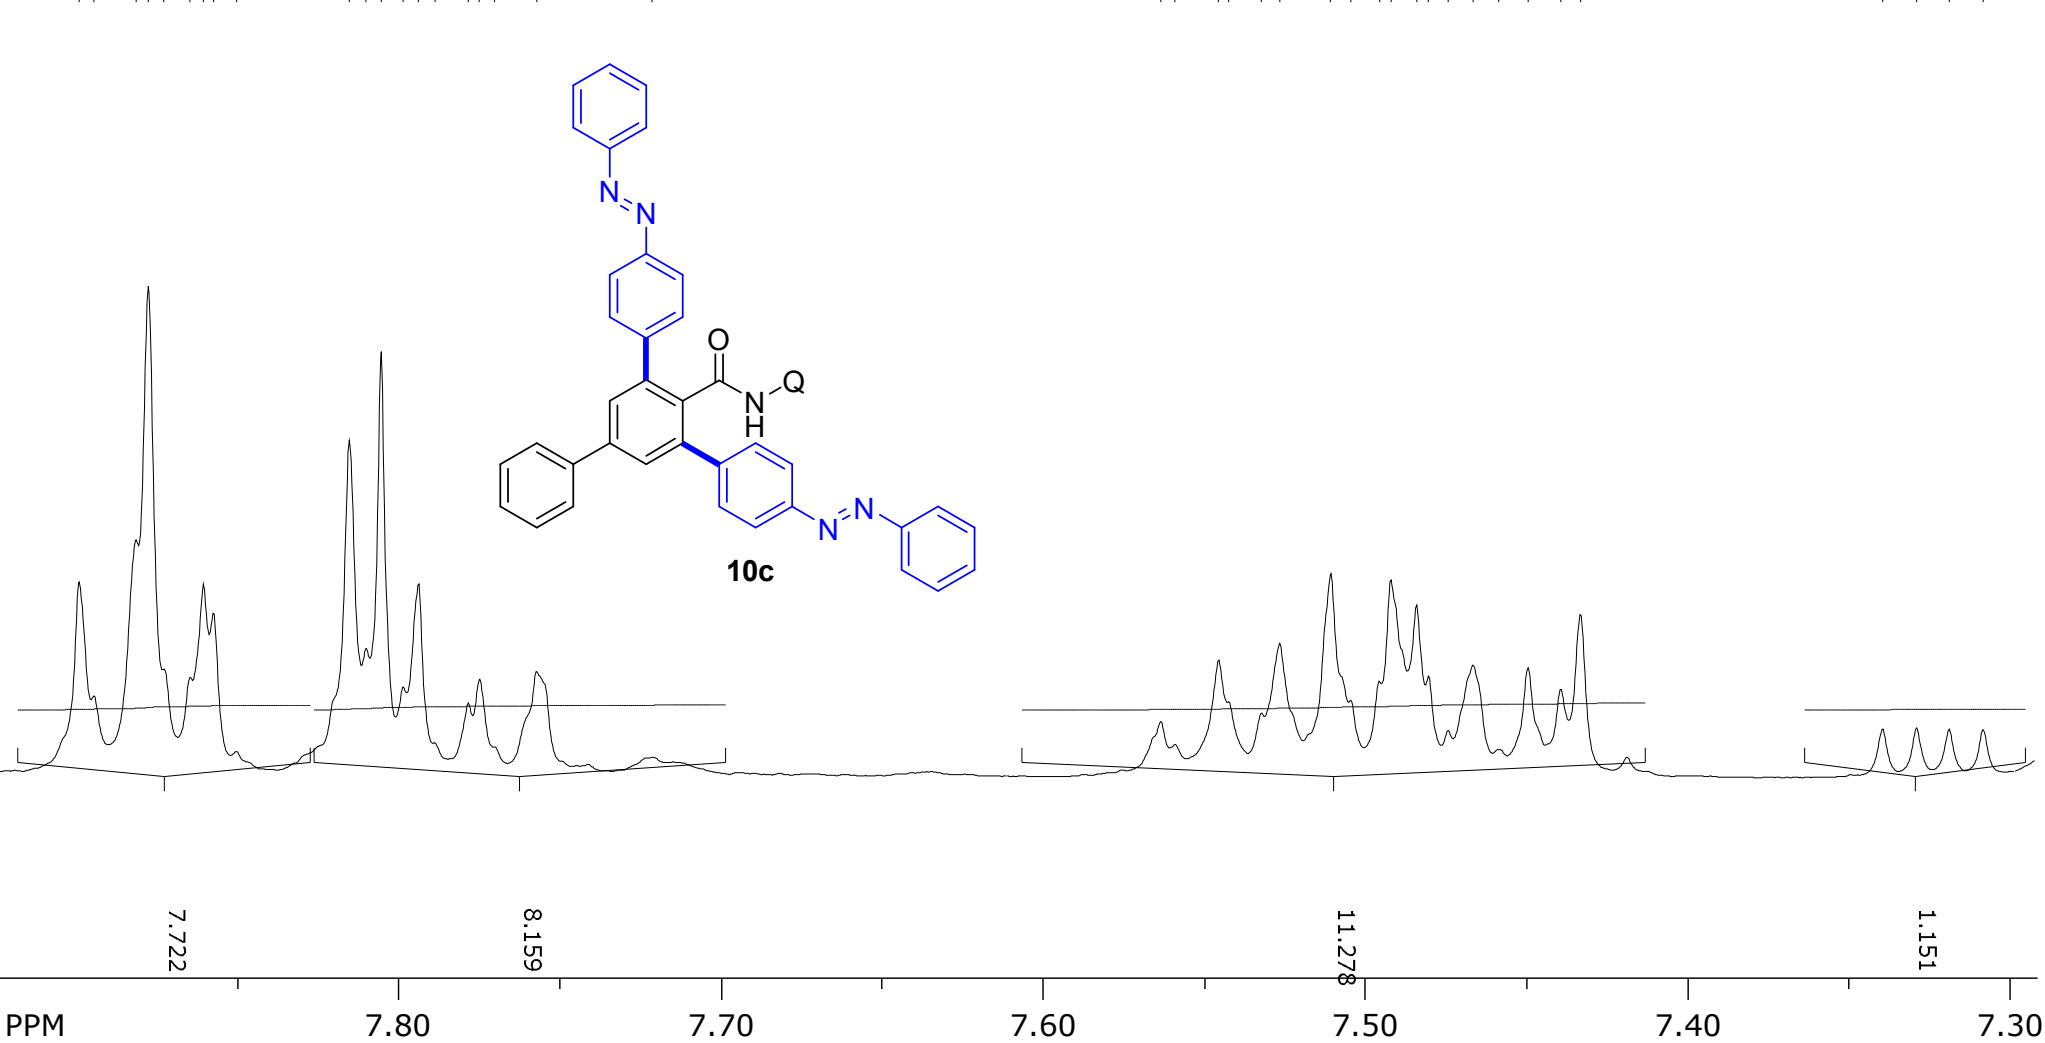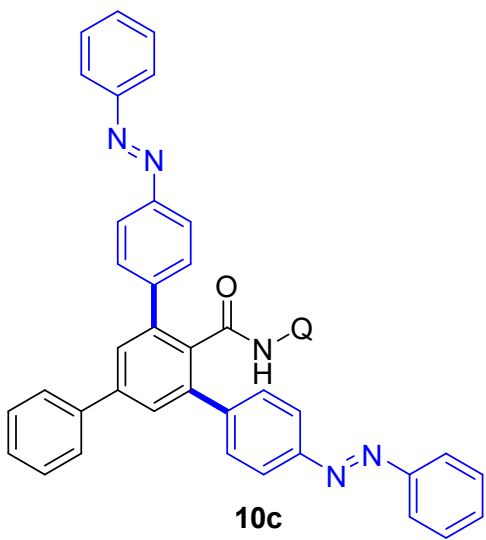

SpinWorks 4: SS-772

C13CPD256 CDCl3 /opt/topspin3.5pl2/nmrdata nmrsu 9

116.695  
121.467  
121.897  
122.836  
123.013  
127.223  
127.410  
127.744  
129.009  
129.009  
131.057  
134.920  
136.096  
138.328  
139.823  
140.520  
142.570  
143.066  
148.046  
151.794  
152.646  
167.061

76.763  
77.080  
77.398

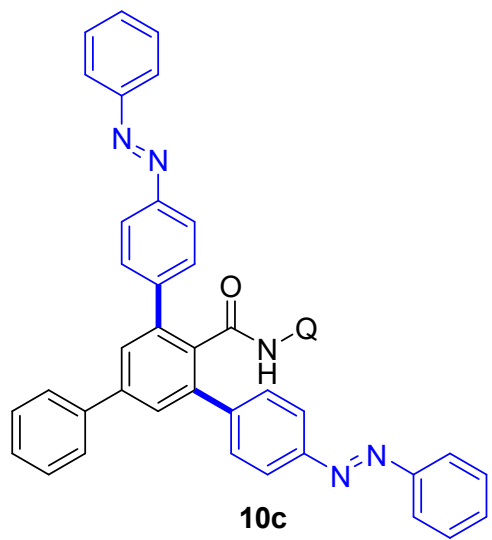

PPM

160

120

80

40

0

SpinWorks 4: SS-772  
C13CPD256 CDCl3 /opt/topspin3.5pl2/nmrdata nmrsu 9

167.061

151.794  
152.646

148.046

142.570  
143.066

139.823  
140.520

138.328

134.067  
134.920

136.096

131.017

129.618

129.099

128.525

128.221

127.744

127.410

127.223

123.013

122.836

121.897

121.467

116.695

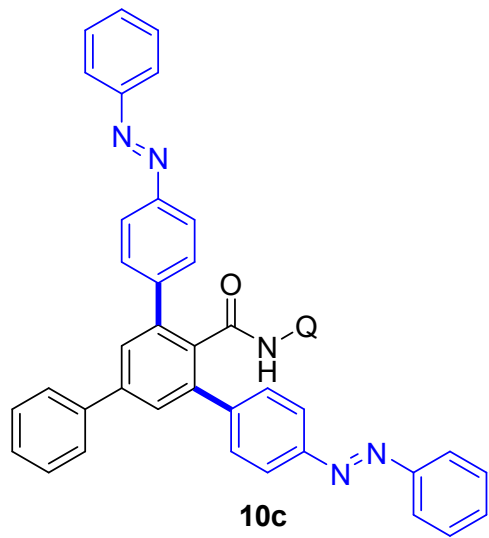

PPM

160

150

140

130

120

110

100





SpinWorks 4: SS-741  
PROTON CDCl3 /opt/topspin3.5pl2/nmrdata nmrsu 21

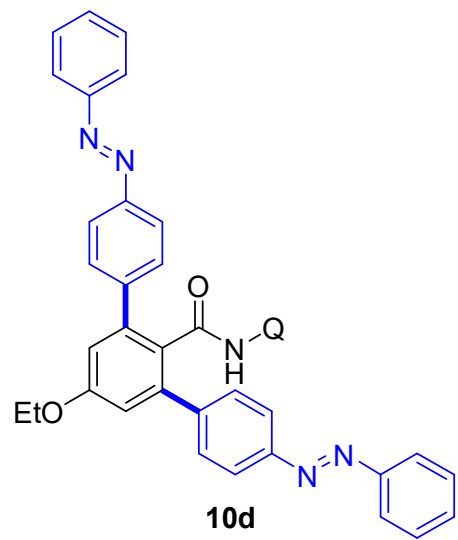

9.7990

8.5710  
8.5756  
8.5900  
8.5968  
8.6010

8.0306  
8.0513

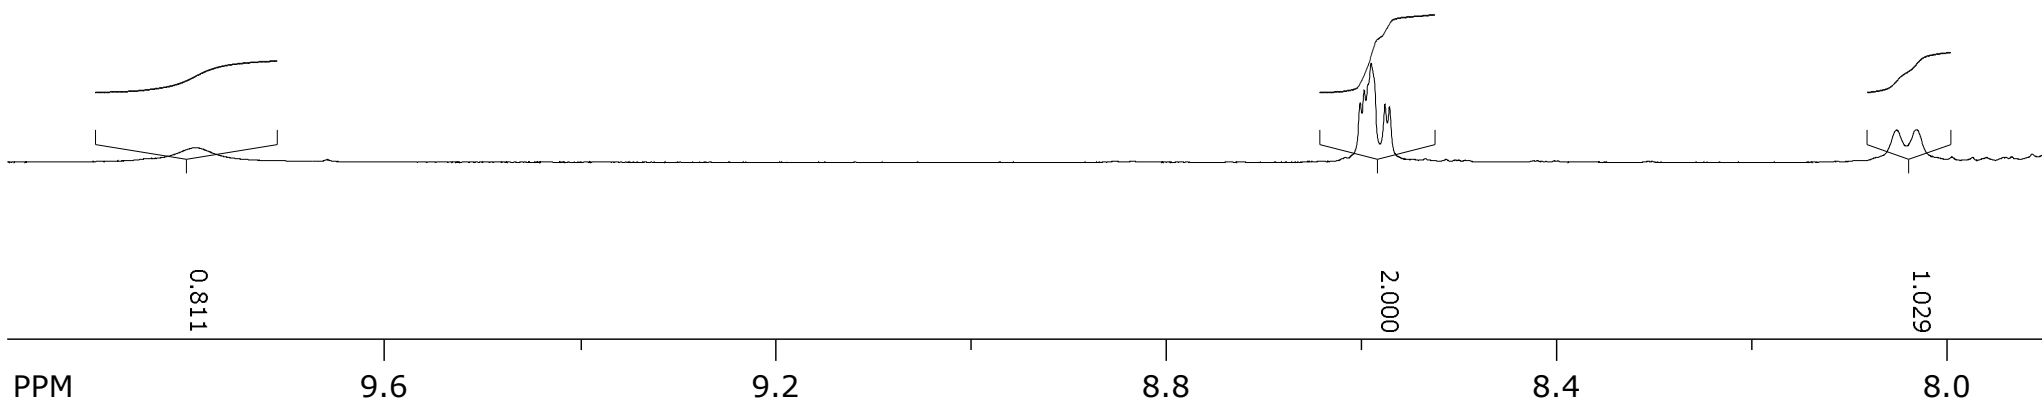

0.811

2.000

1.029

PPM

9.6

9.2

8.8

8.4

8.0

SpinWorks 4: SS-741  
PROTON CDCl3 /opt/topspin3.5pl2/nmrdata nmrsu 21

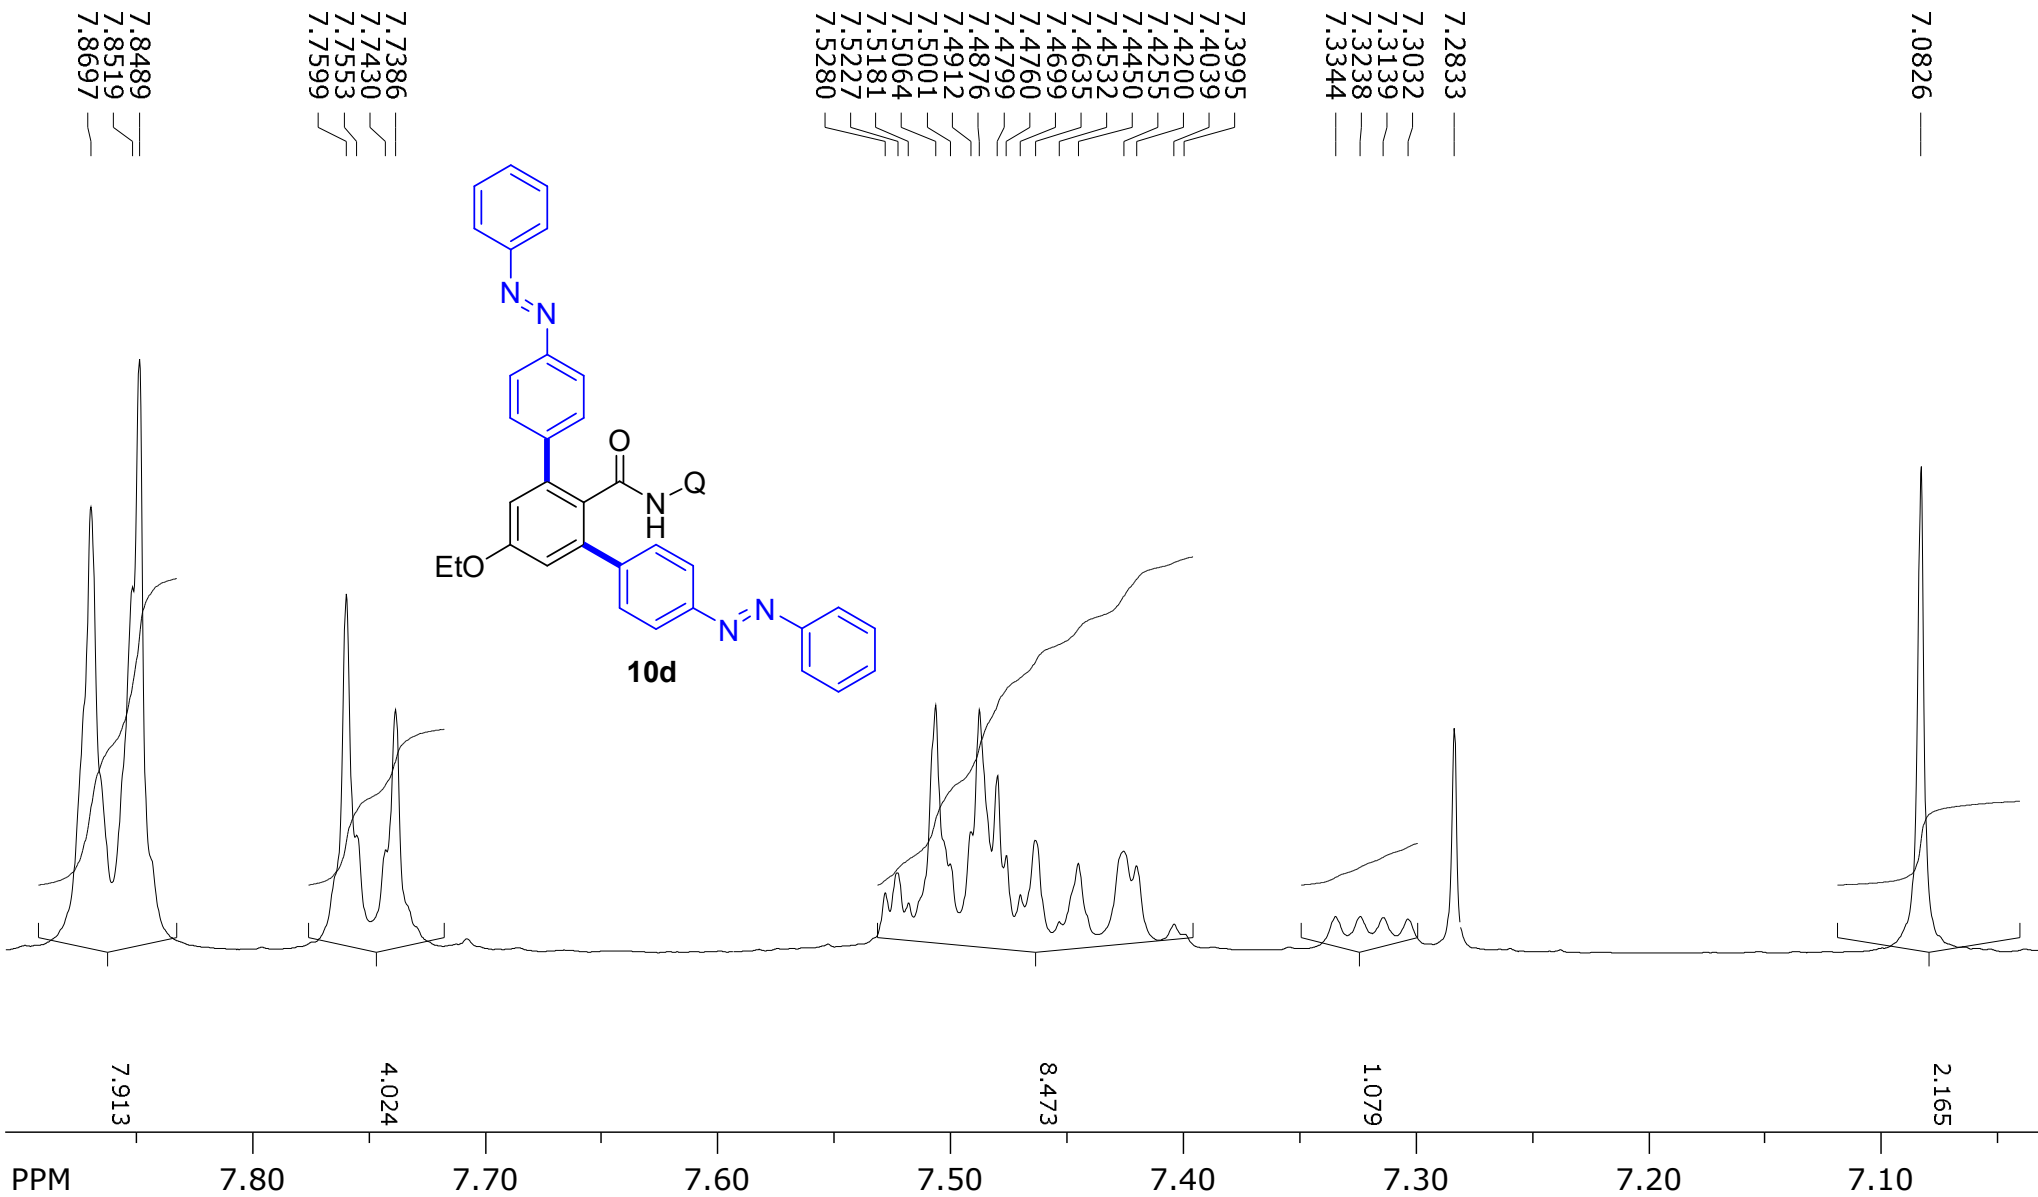

SpinWorks 4: SS-741  
PROTON CDCl3 /opt/topspin3.5pl2/nmrdata nmrsu 21

4.1968  
4.2143  
4.2318  
4.2492

1.5107  
1.5282  
1.5456

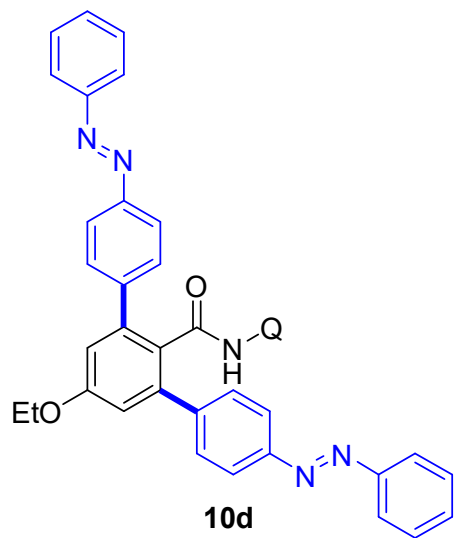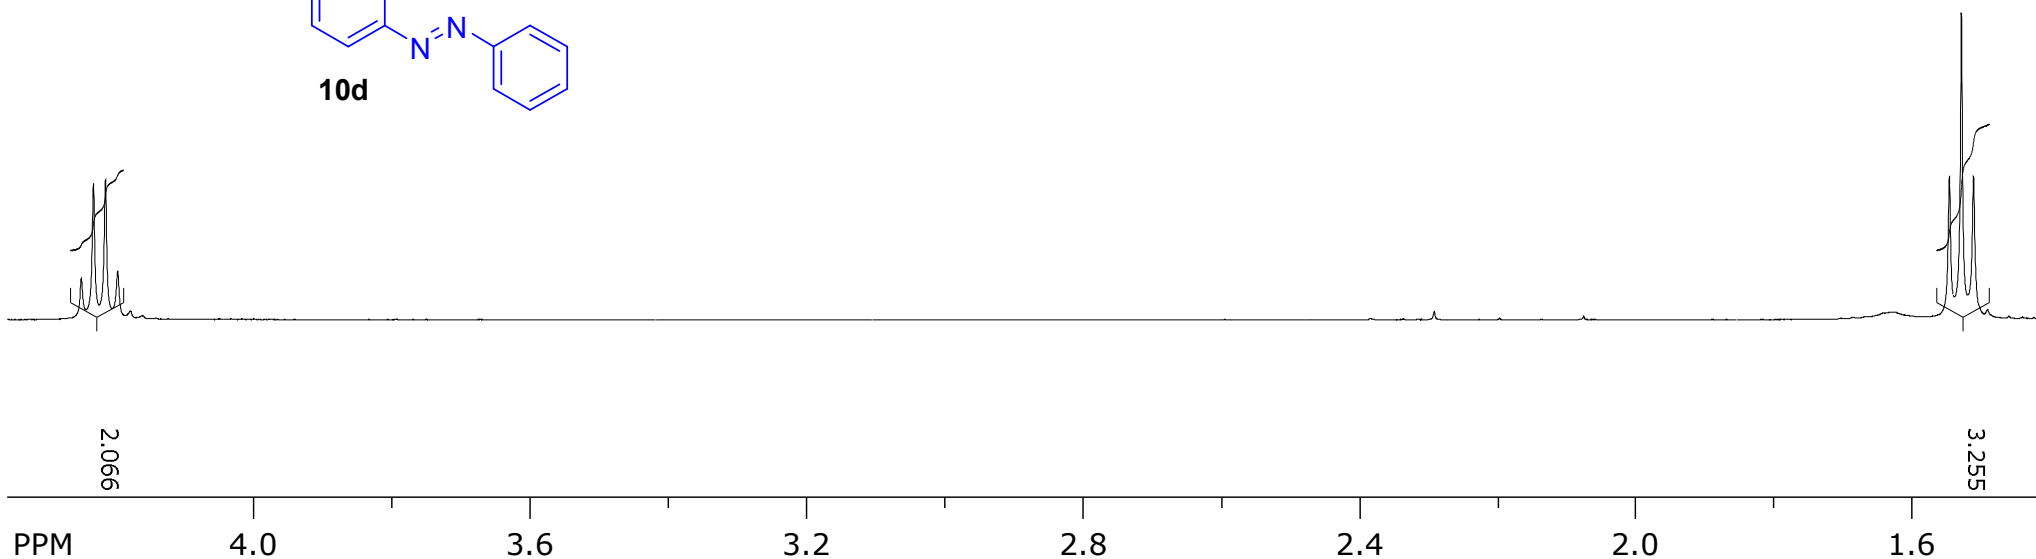

SpinWorks 4: SS 741  
C13CPD256 CDCl3 /opt/topspin3.5pl2/nmrdata nmrsu 39

115.563  
116.483  
121.286  
121.621  
122.723  
122.835  
127.121  
127.615  
128.976  
129.394  
130.897  
134.185  
135.993  
136.006  
141.624  
143.146  
147.814  
151.666  
152.543  
159.107  
167.112

76.709  
77.028  
77.345

63.854

14.766



PPM

160

120

80

40

0

105



SpinWorks 4: SS-771  
PROTON CDCl3 /opt/topspin3.5pl2/nmrdata nmrsu 59

9.7618

8.5623  
8.5687  
8.5780  
8.5848  
8.5917  
8.6019

8.0169  
8.0374

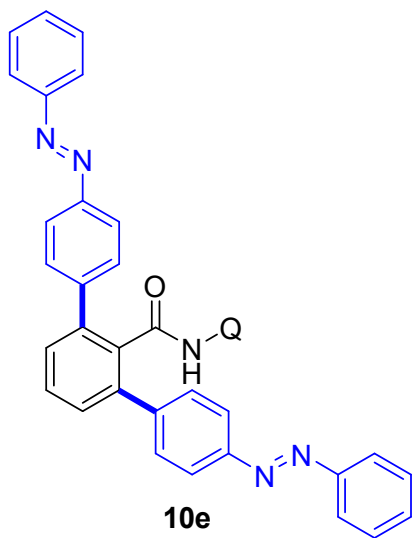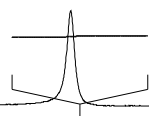

0.999

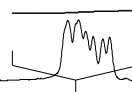

1.949

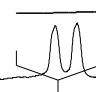

1.162

PPM 9.8 9.6 9.4 9.2 9.0 8.8 8.6 8.4 8.2 8.0

SpinWorks 4: SS-771  
PROTON CDCl3 /opt/topspin3.5pl2/nmrdata nmrsu 59

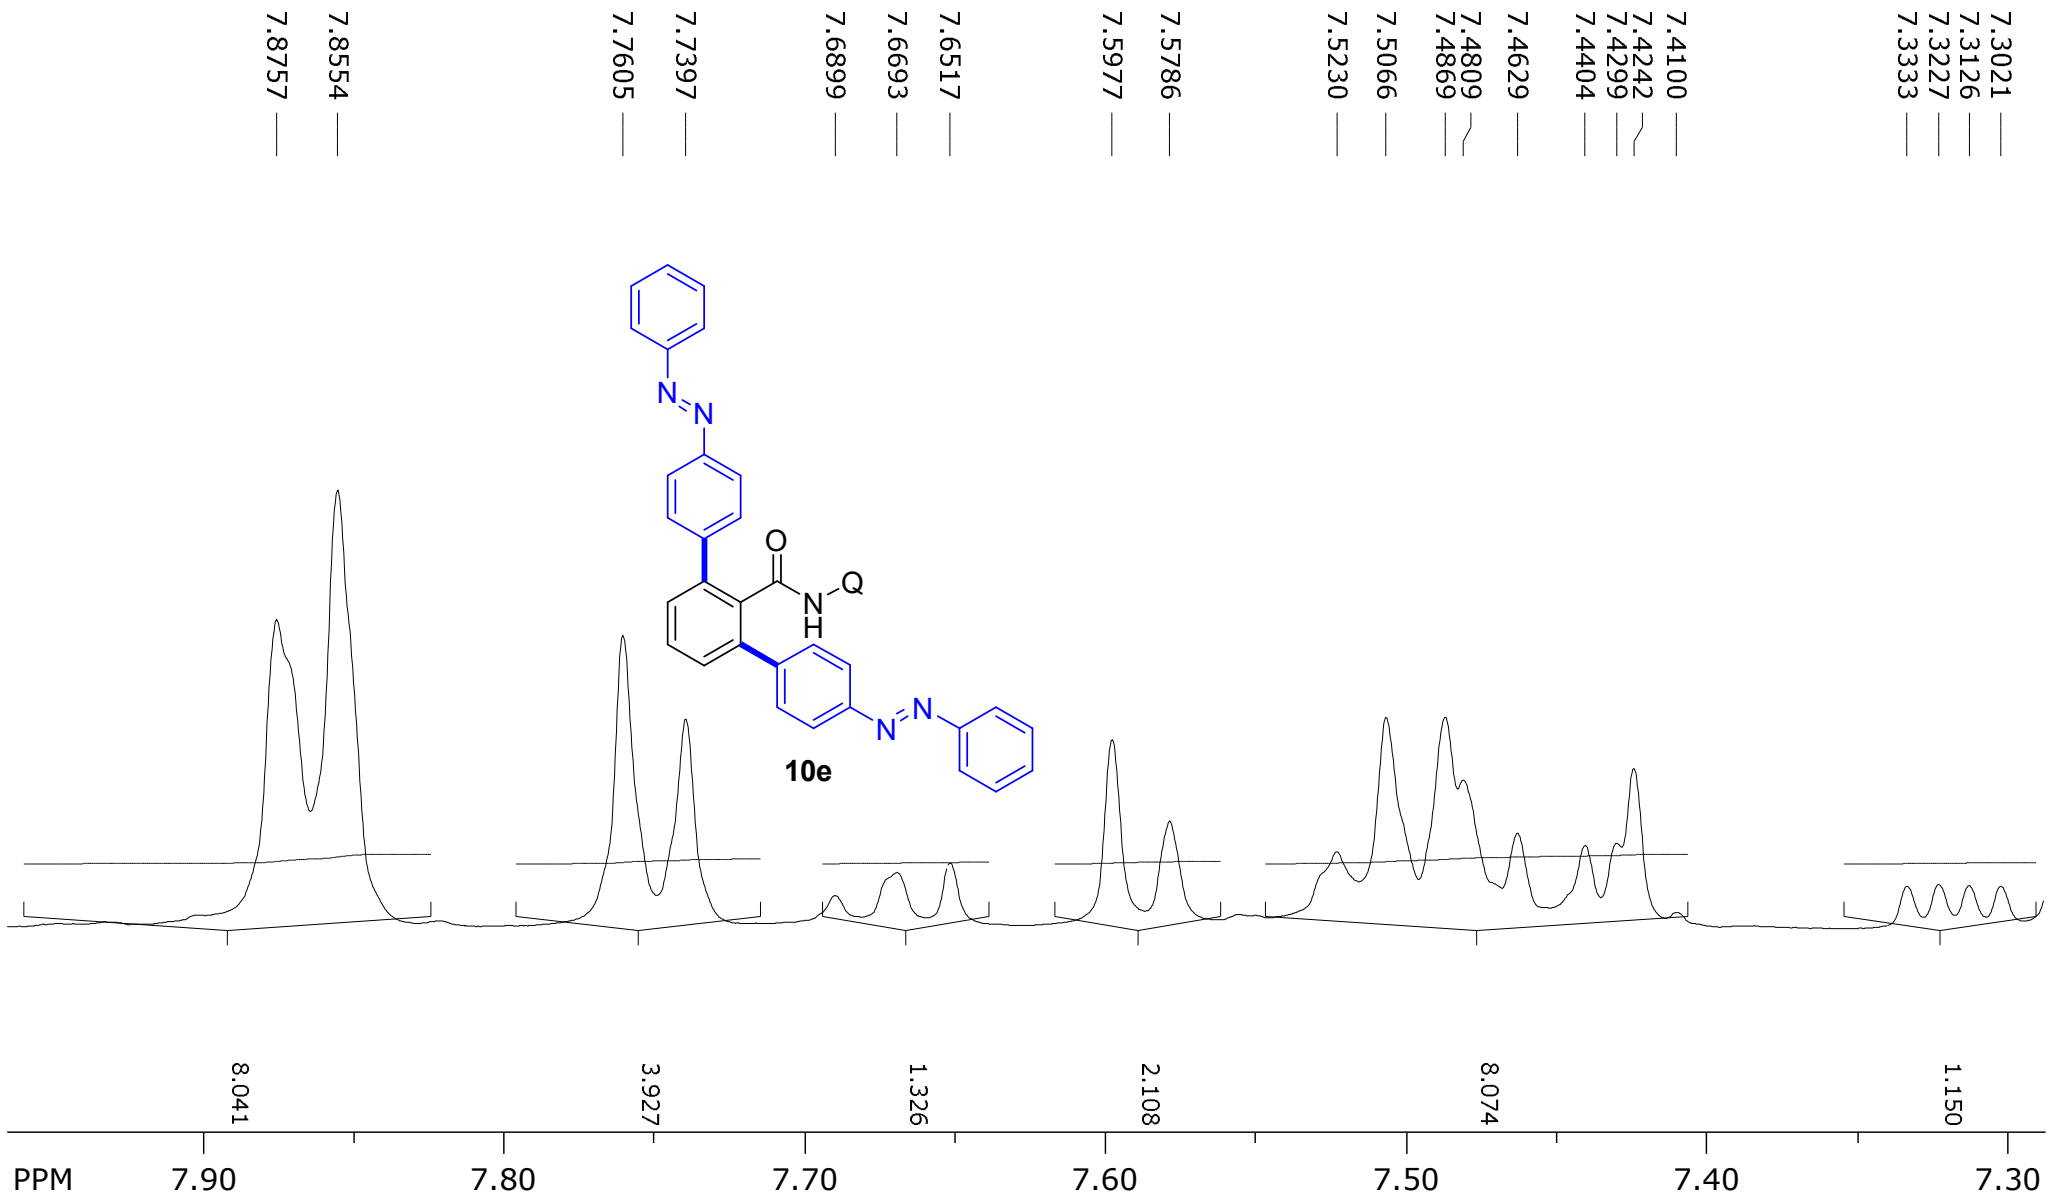



SpinWorks 4: SS 771  
C13CPD256 CDCl3 /opt/topspin3.5pl2/nmrdata nmrsu 12

116.701  
121.446  
121.884  
122.812  
122.939  
122.998  
127.204  
127.733  
129.073  
129.579  
129.836  
130.987  
134.026  
136.094  
138.321  
139.873  
143.055  
148.024  
151.719  
152.645  
167.109

76.758  
77.076  
77.393

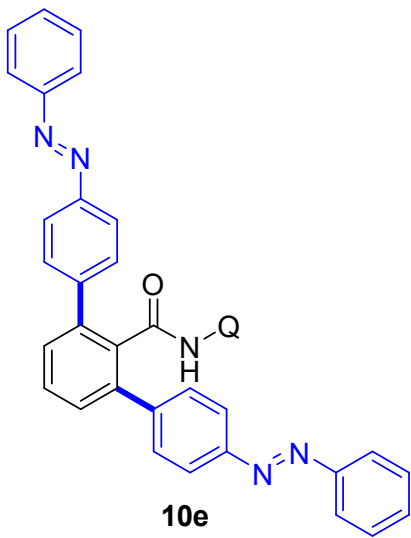

PPM

160

120

80

40

0

SpinWorks 4: SS 771  
C13CPD256 CDCl3 /opt/topspin3.5pl2/nmrdata nmrsu 12

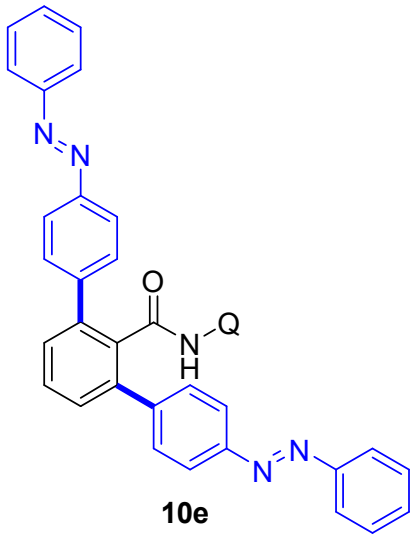

167.109 —

151.719 —  
152.645 —

148.024 —

143.055 —

139.873 —  
138.321 —

136.094 —

134.026 —

130.987 —  
129.836 —  
129.579 —  
129.122 —  
129.073 —  
127.733 —  
127.204 —

122.939 —  
122.812 —  
121.884 —  
121.446 —  
122.998 —

116.701 —

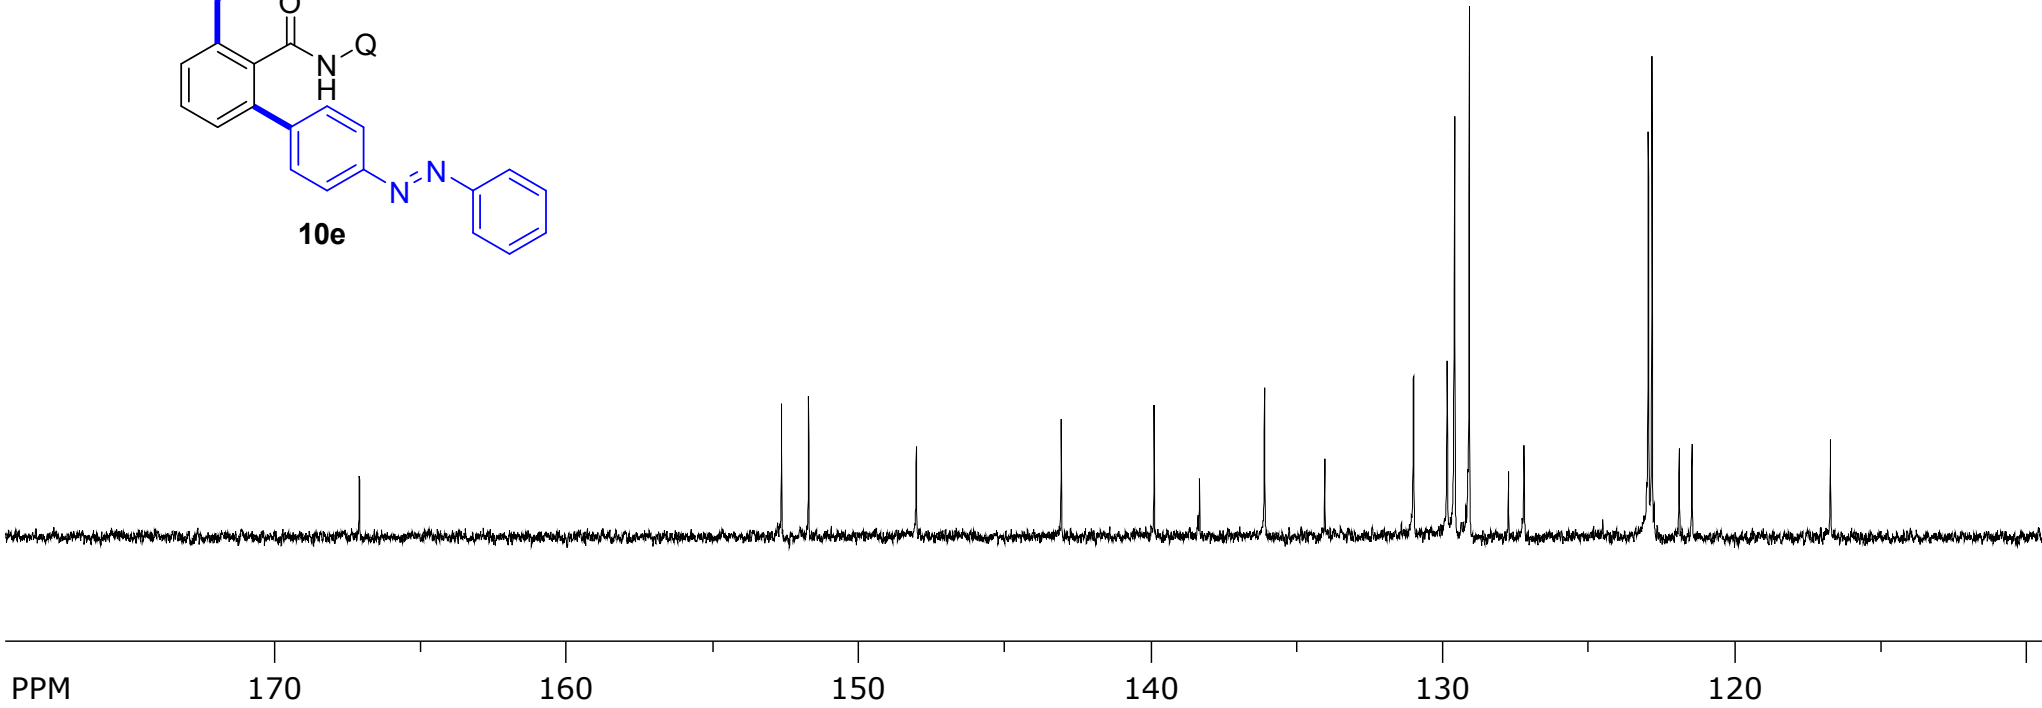



SpinWorks 4: SS-742-REP  
PROTON CDCl3 /opt/topspin3.5pl2/nmrdata nmrsu 1

8.5968  
8.6026  
8.6089  
8.6129  
8.6192

8.0729  
8.0824  
8.0928

7.8574  
7.8604  
7.8739  
7.8905  
7.8950

7.7924  
7.7962  
7.8182

7.6688  
7.6891

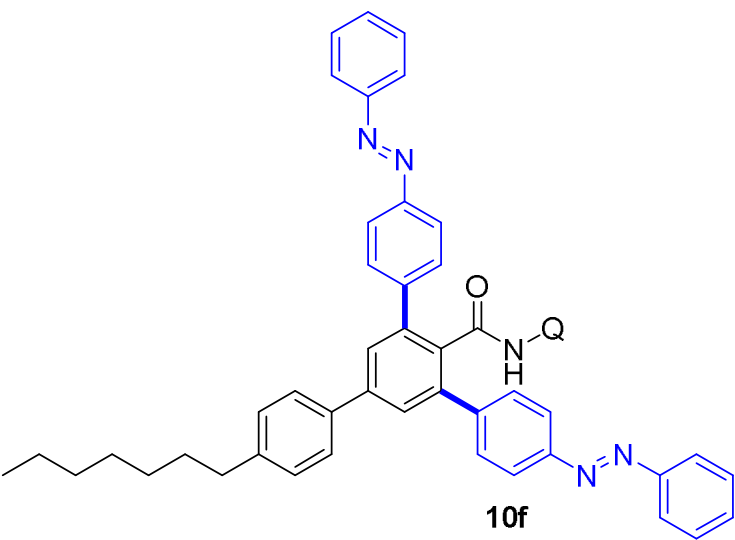

10f

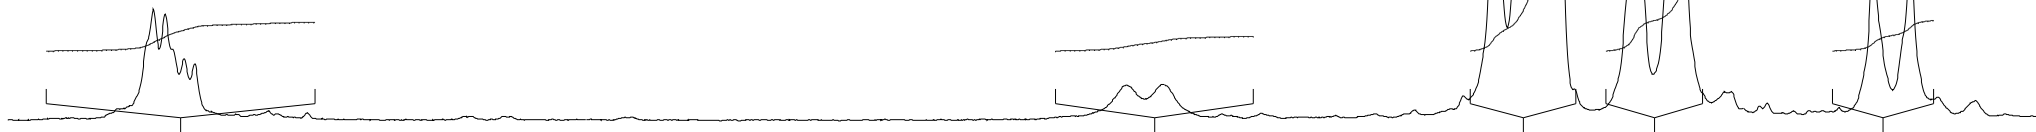

1.967

1.000

6.963

5.107

2.089

PPM

8.4

8.2

8.0

7.8

SpinWorks 4: SS-742-REP  
PROTON CDCl3 /opt/topspin3.5pl2/nmrdata nmrsu 1

7.5229  
7.5277  
7.5327

7.5052  
7.5113

7.4924

7.4805  
7.4844

7.4739  
7.4676

7.4570

7.3592

7.3390

7.3224

7.2838

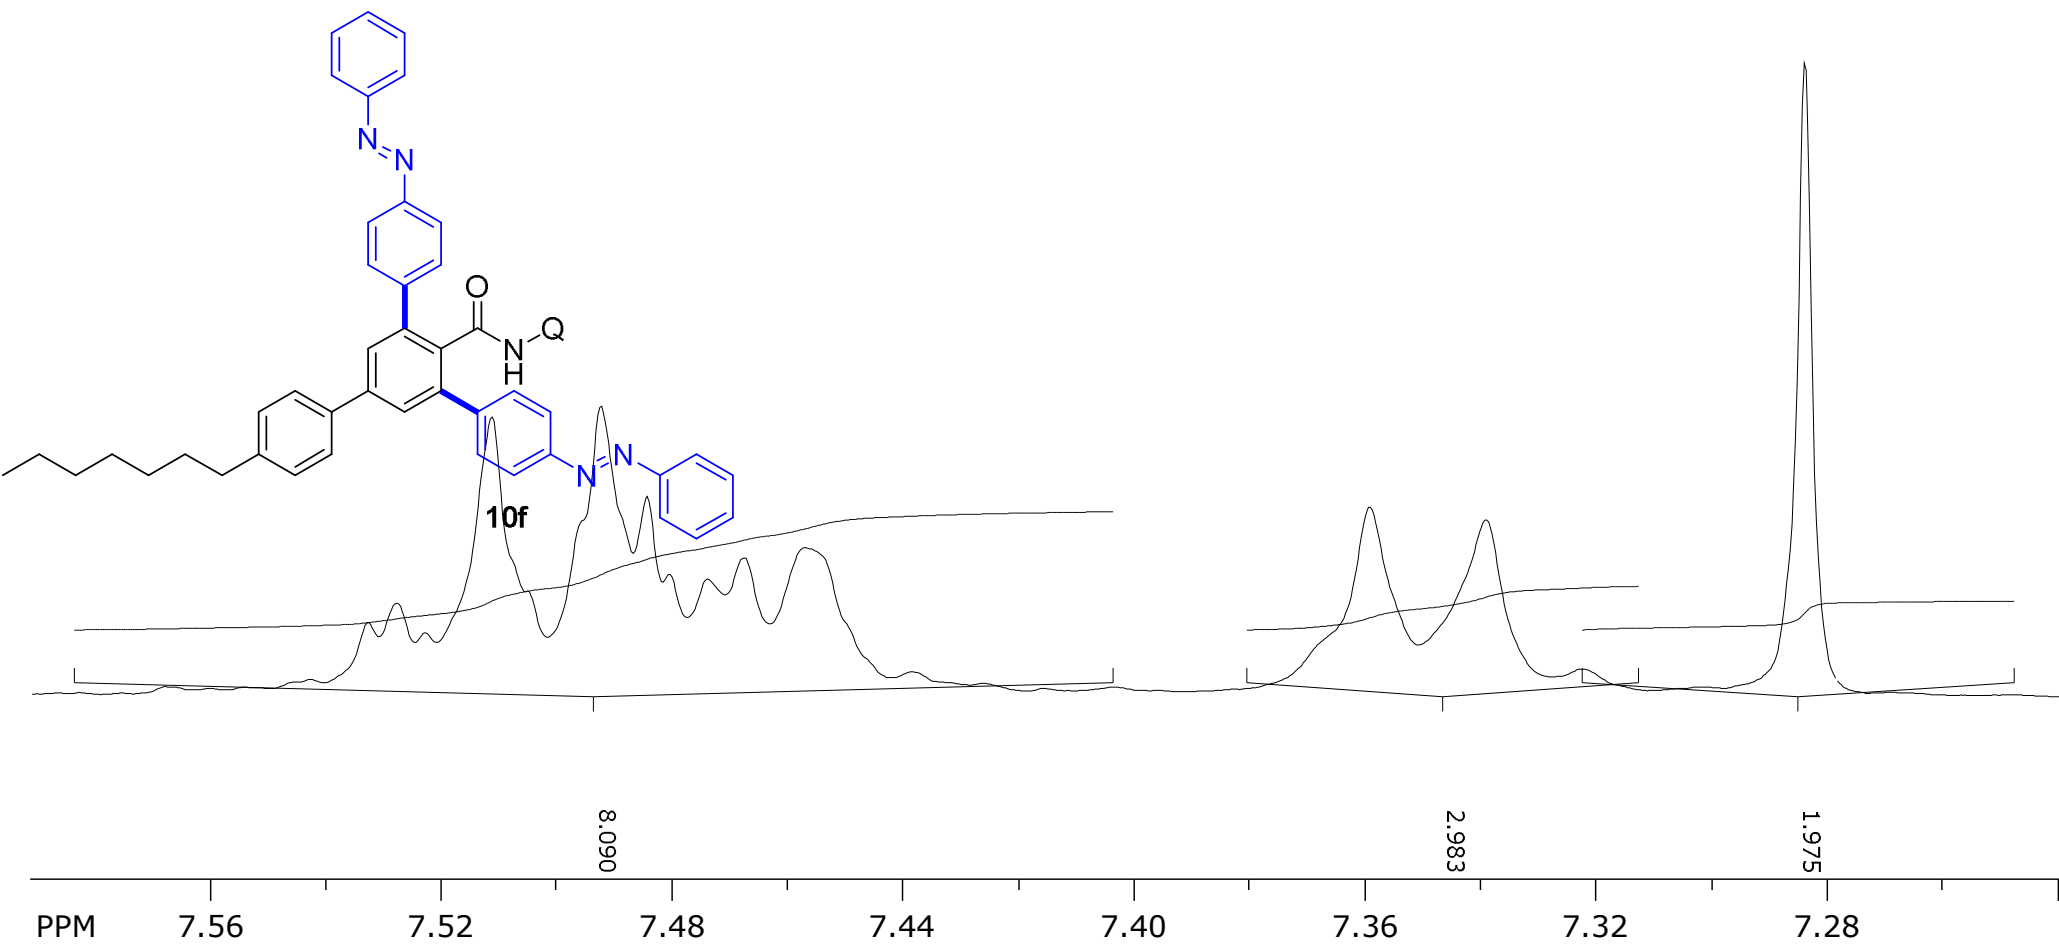

SpinWorks 4: SS-742-REP  
PROTON CDCl3 /opt/topspin3.5pl2/nmrdata nmrsu 1

2.68888  
2.7084  
2.72273

1.6627  
1.6710  
1.6815  
1.7002  
1.7124  
1.7168  
1.7325

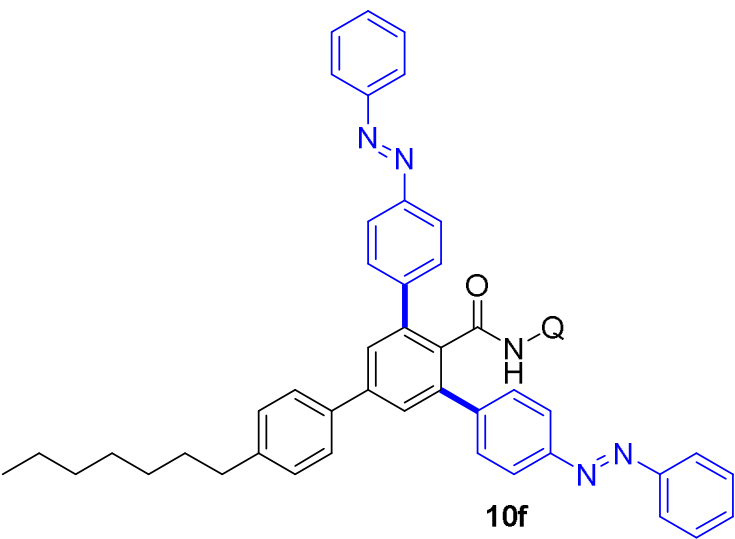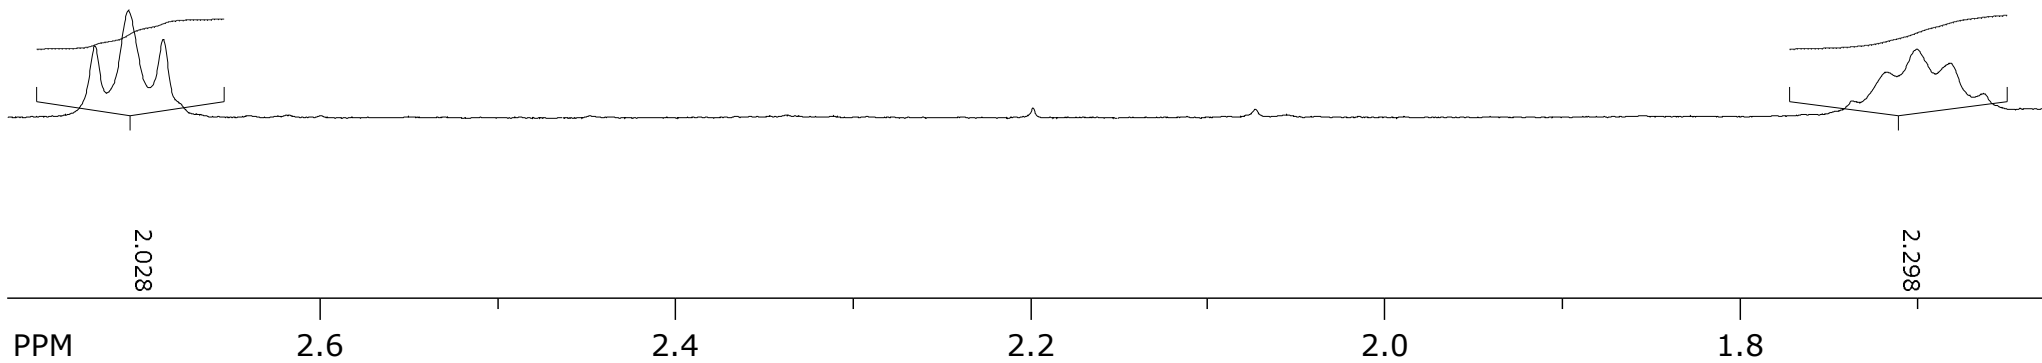

SpinWorks 4: SS-742-REP  
PROTON CDCl3 /opt/topspin3.5pl2/nmrdata nmrsu 1

1.31110  
1.3206  
1.3256  
1.3436  
1.3470  
1.3614  
1.3789  
1.3875  
1.3962  
1.4299  
1.4380

0.9014  
0.9187  
0.9354

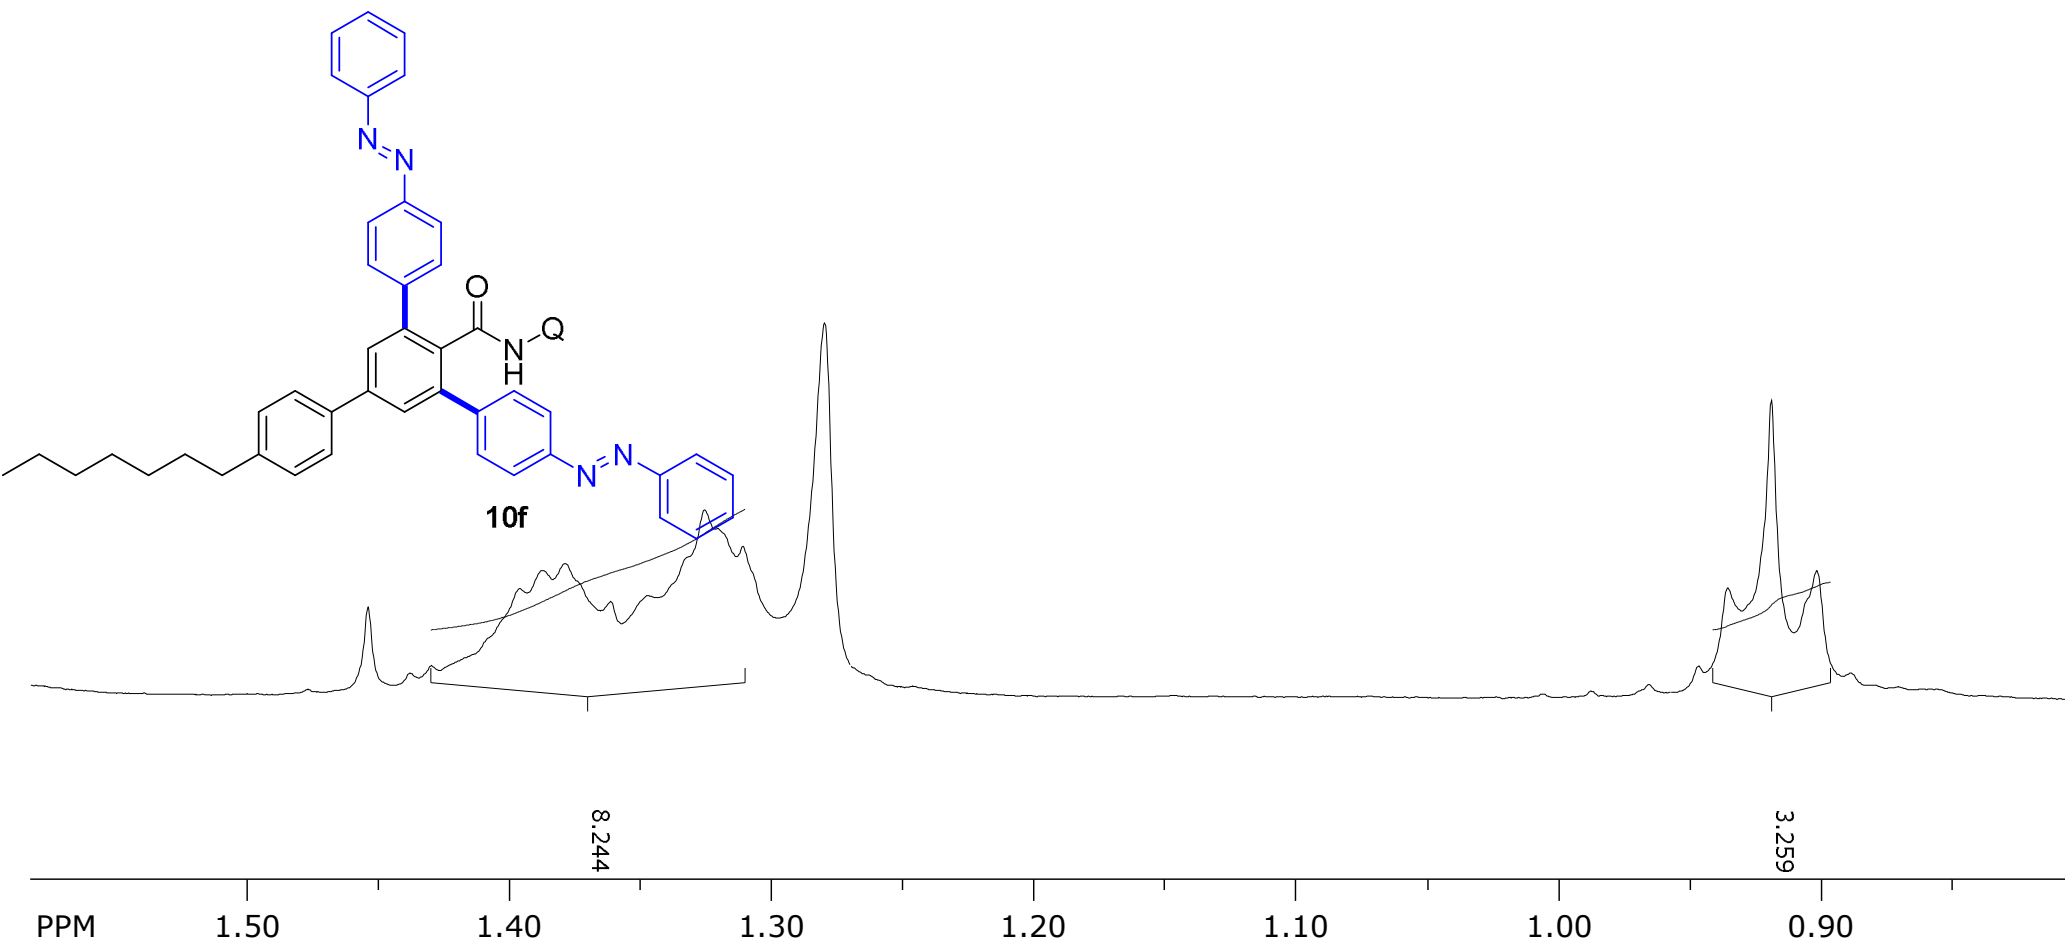

SpinWorks 4: SS-742 REP  
C13CPD256 CDCl3 /opt/topspin3.5pl2/nmrdata nmrsu\_14

167.2601  
152.6450  
151.7417  
143.2174  
143.2029  
142.5203  
140.4322  
137.0995  
134.5340  
131.0275  
130.9750  
129.0858  
129.0858  
127.2282  
127.1845  
122.9412  
122.8063  
121.9488  
121.3598

76.7236  
77.0416  
77.3588

35.7010  
31.8585  
31.5390  
29.7280  
29.3581  
22.7145  
22.2332  
14.1578

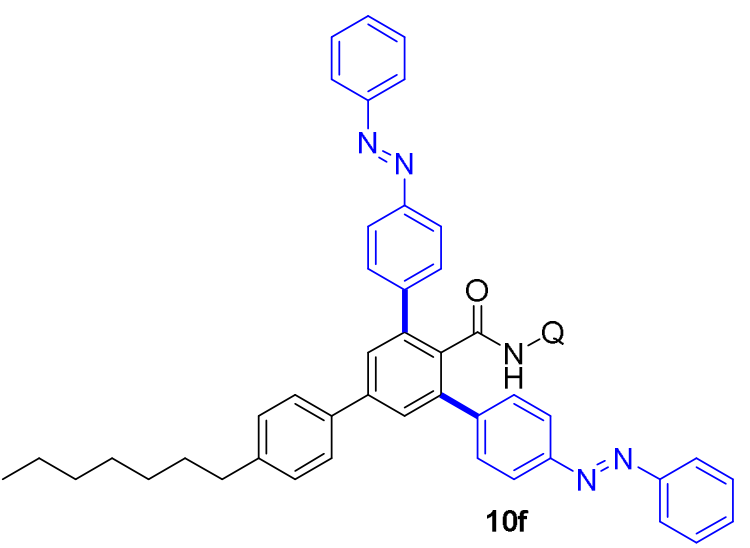

PPM

160 120 80 40 0



SpinWorks 4: SS-742 REP  
C13CPD256 CDCl3 /opt/topspin3.5pl2/nmrdata nmrsu 14

167.2601 —  
151.7417 —  
152.6450 —  
143.2174 —  
142.5203 —  
143.2029 —  
140.4322 —  
137.0995 —  
134.5340 —  
131.0275 —  
130.9750 —  
129.6858 —  
129.6340 —  
129.5941 —  
129.5497 —  
129.1363 —  
129.0675 —  
128.3029 —  
127.8677 —  
127.4760 —  
127.2282 —  
127.1845 —  
122.9412 —  
122.8063 —  
121.9488 —  
121.3598 —

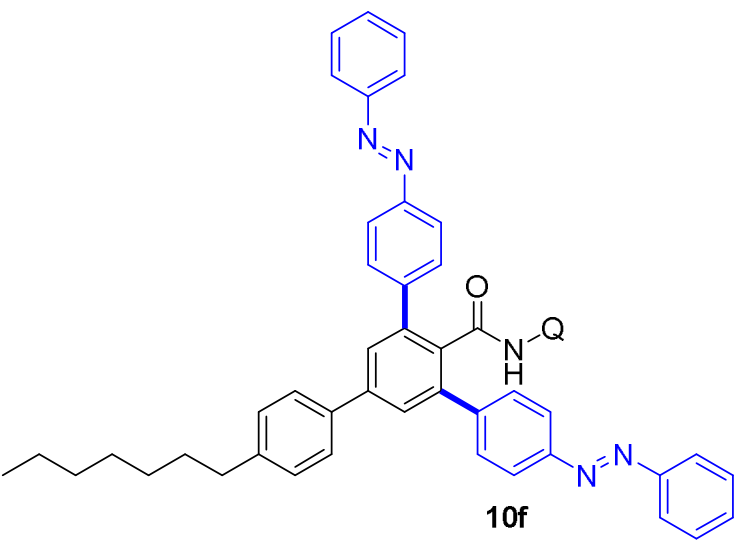

PPM 170 160 150 140 130 120 110 100

SpinWorks 4: SS-742 REP  
C13CPD256 CDCl3 /opt/topspin3.5pl2/nmrdata nmrsu 14

35.7010 —

31.5390 —  
31.8585 —

29.2332 —  
29.3581 —  
29.7280 —

22.7145 —

14.1578 —

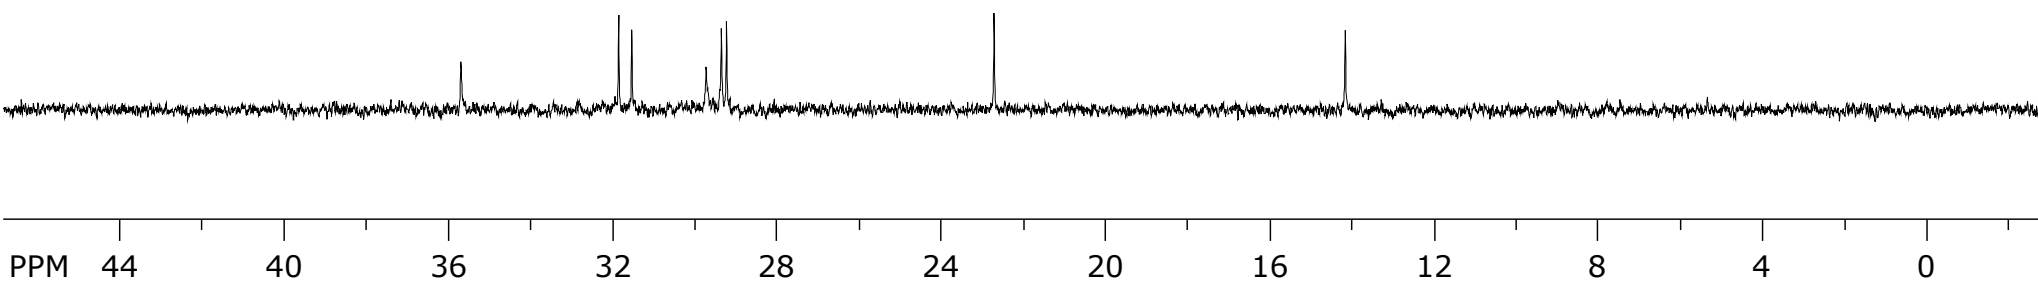

SS-184-p

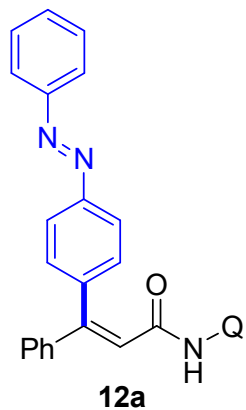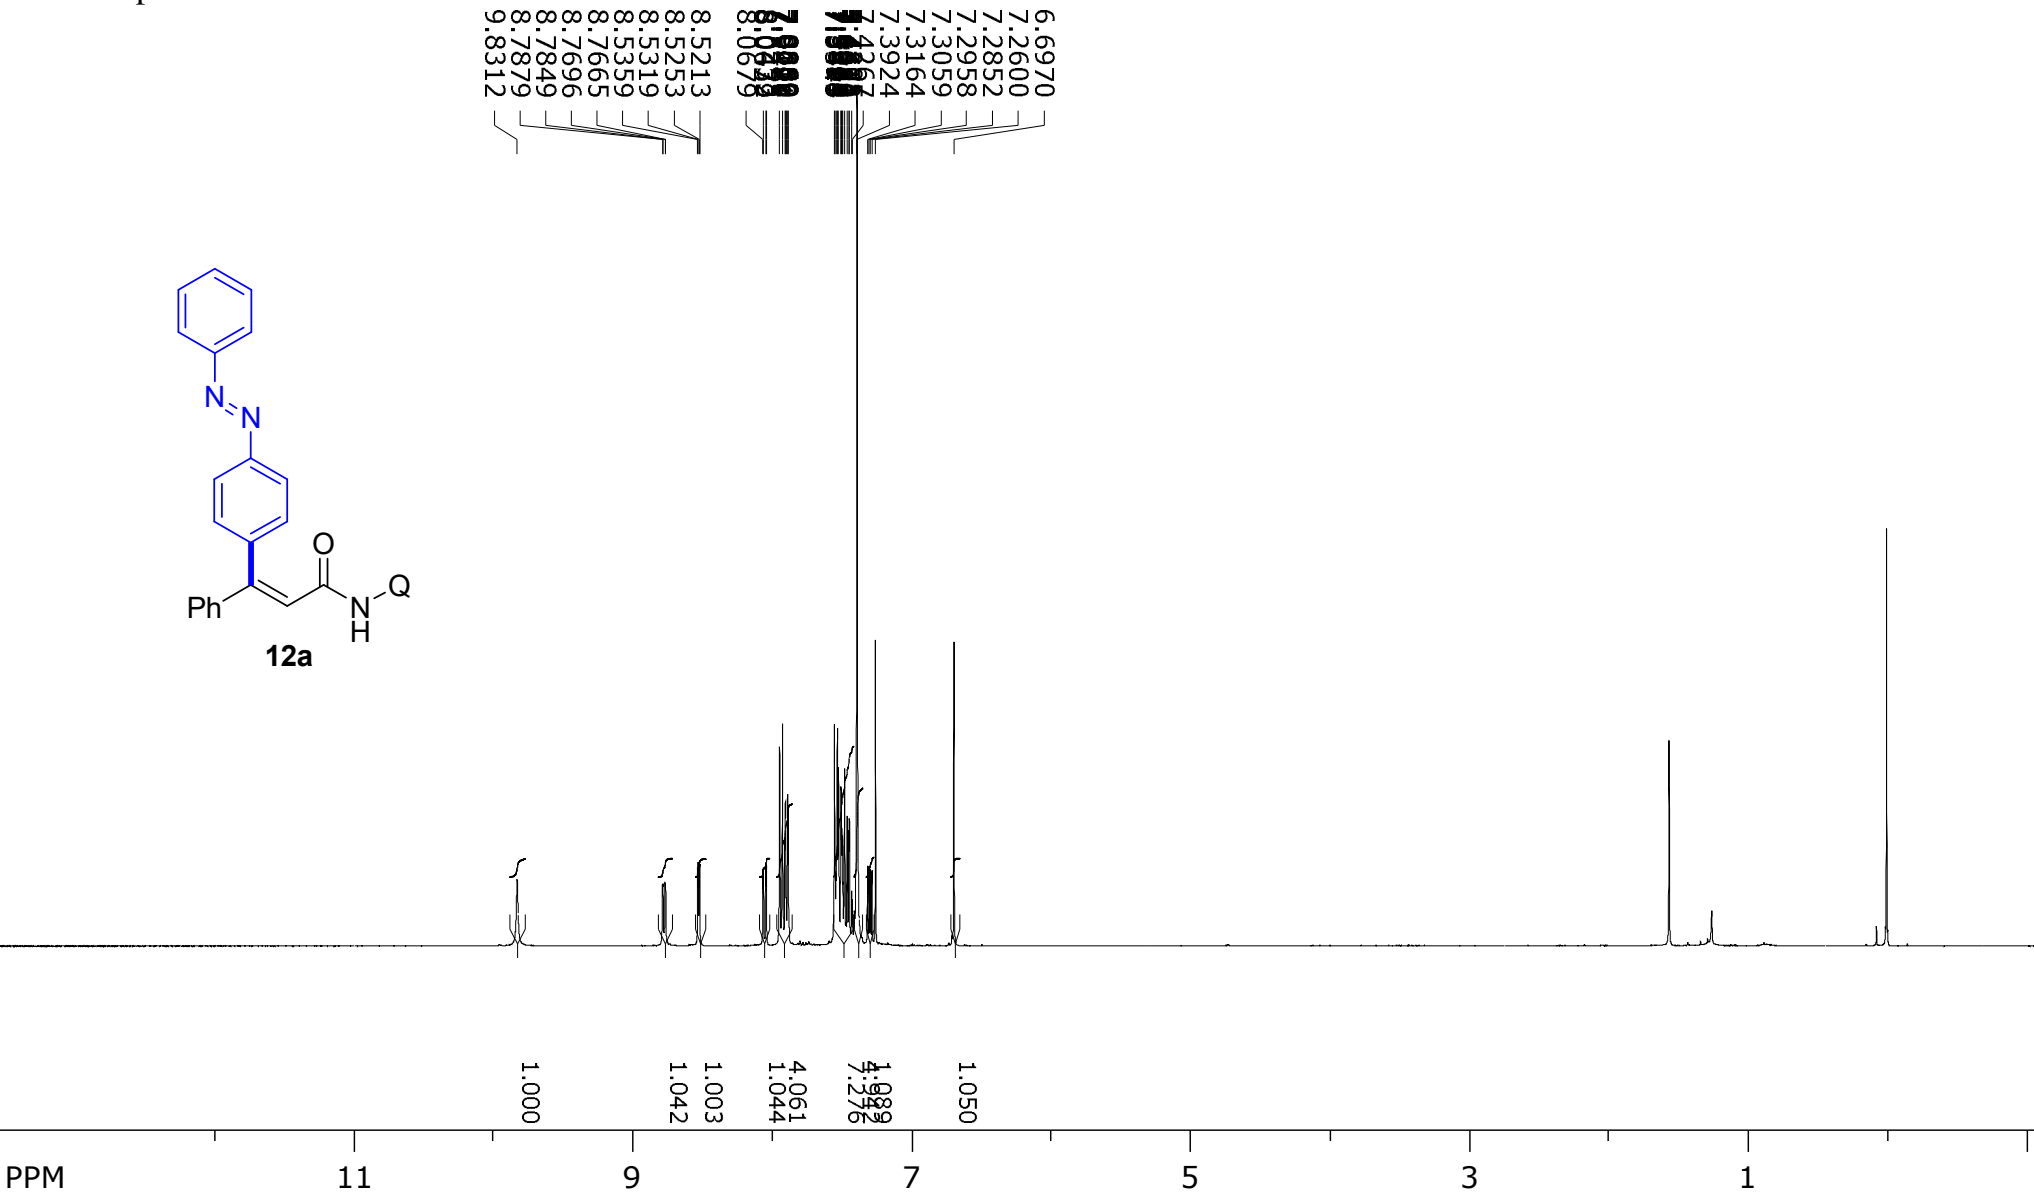

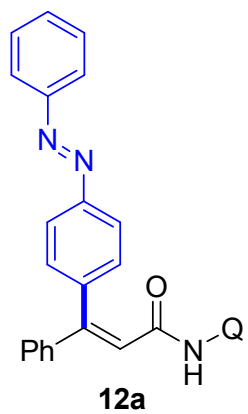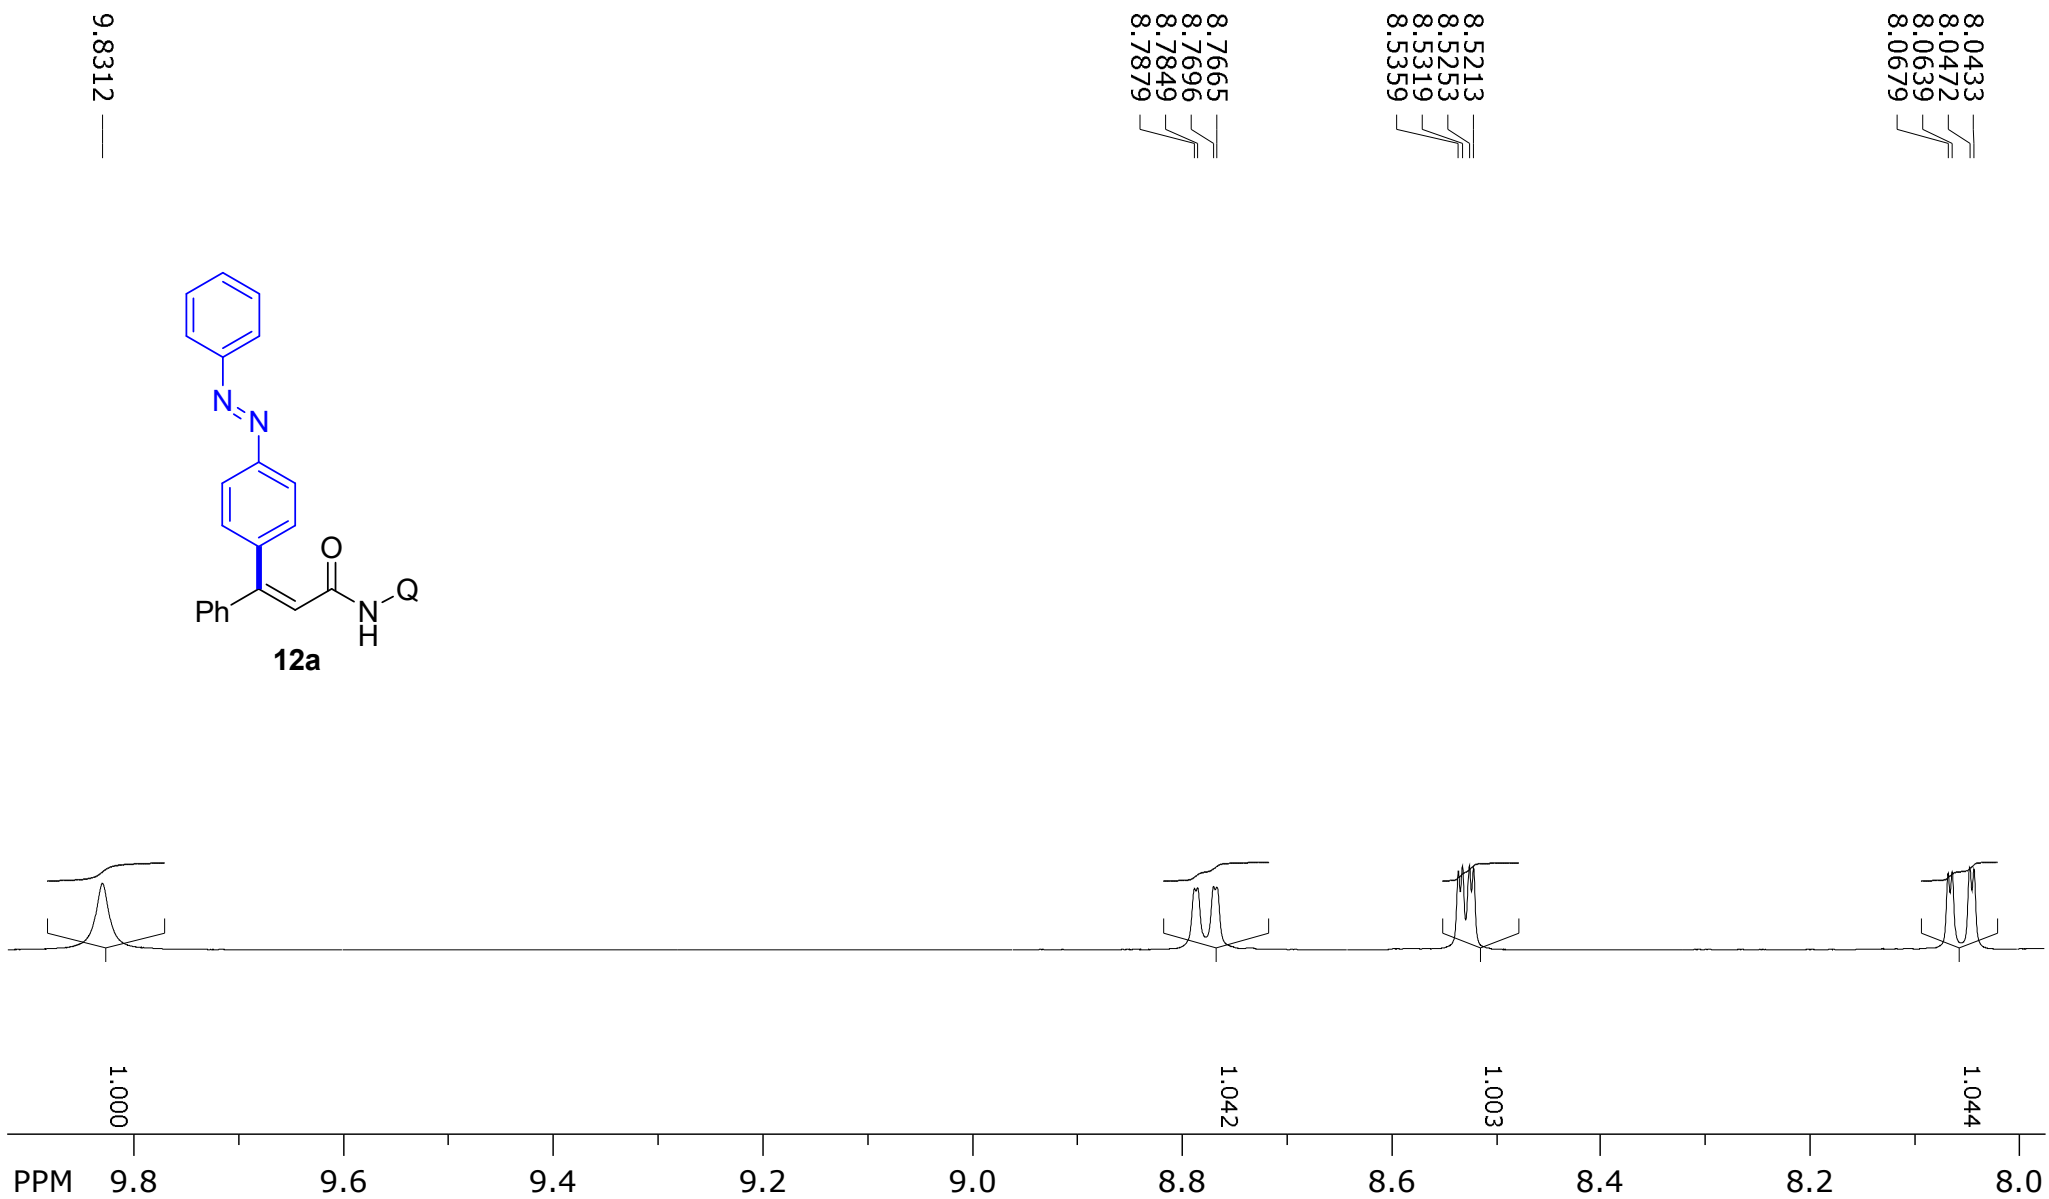

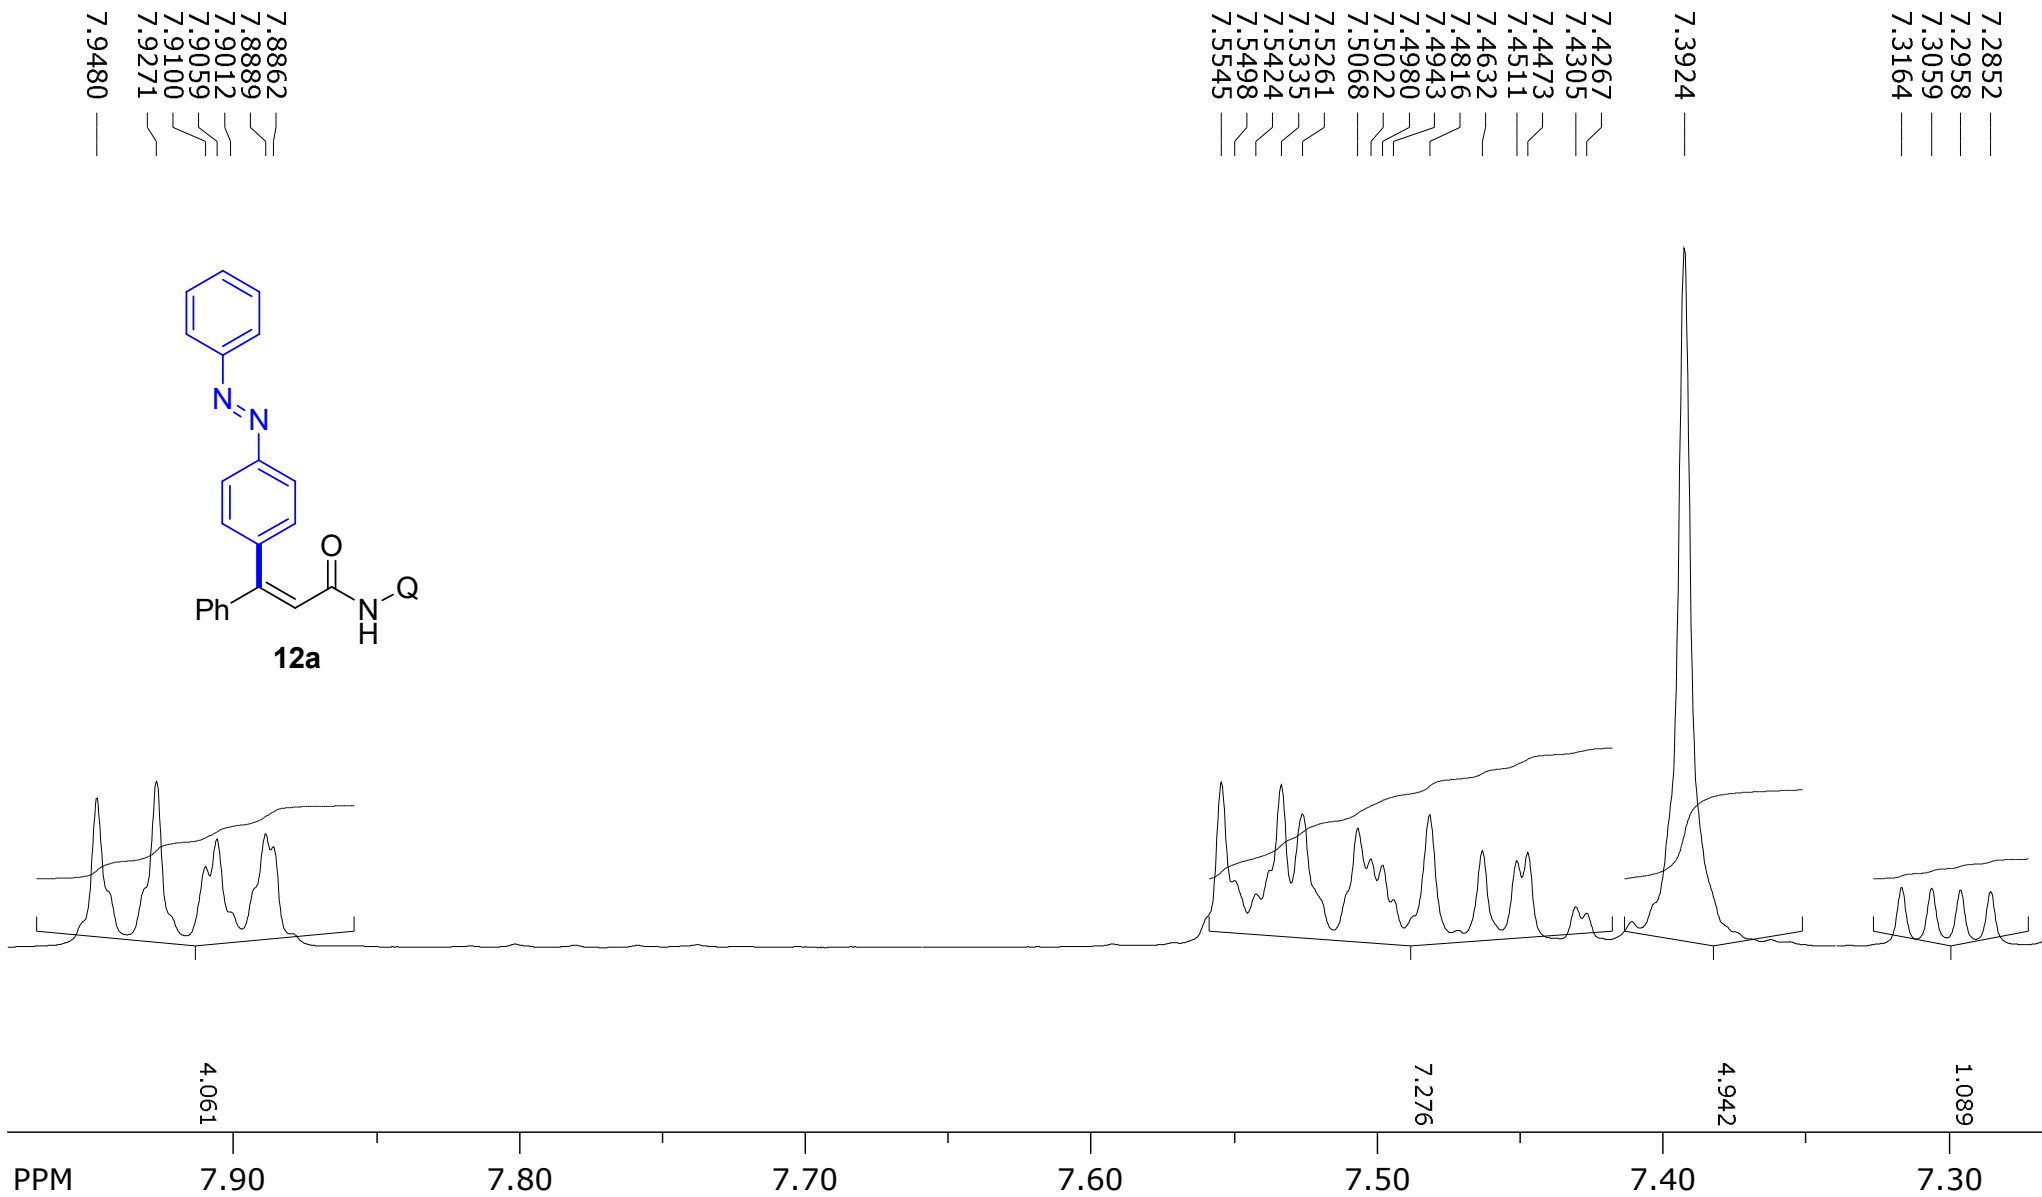

SpinWorks 4: SS 184 P  
C13CPD256 CDCl3 /opt/topspin3.5pl2/nmrdata nmrsu 59

164.263  
152.735  
151.490  
147.867  
141.311  
140.943  
138.335  
136.127  
134.479  
131.130  
130.706  
129.387  
129.185  
128.985  
127.805  
127.356  
123.175  
123.080  
122.883  
121.526  
121.469  
116.526  
77.397  
77.079  
76.761

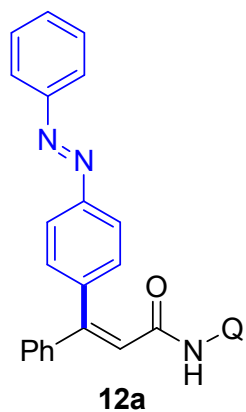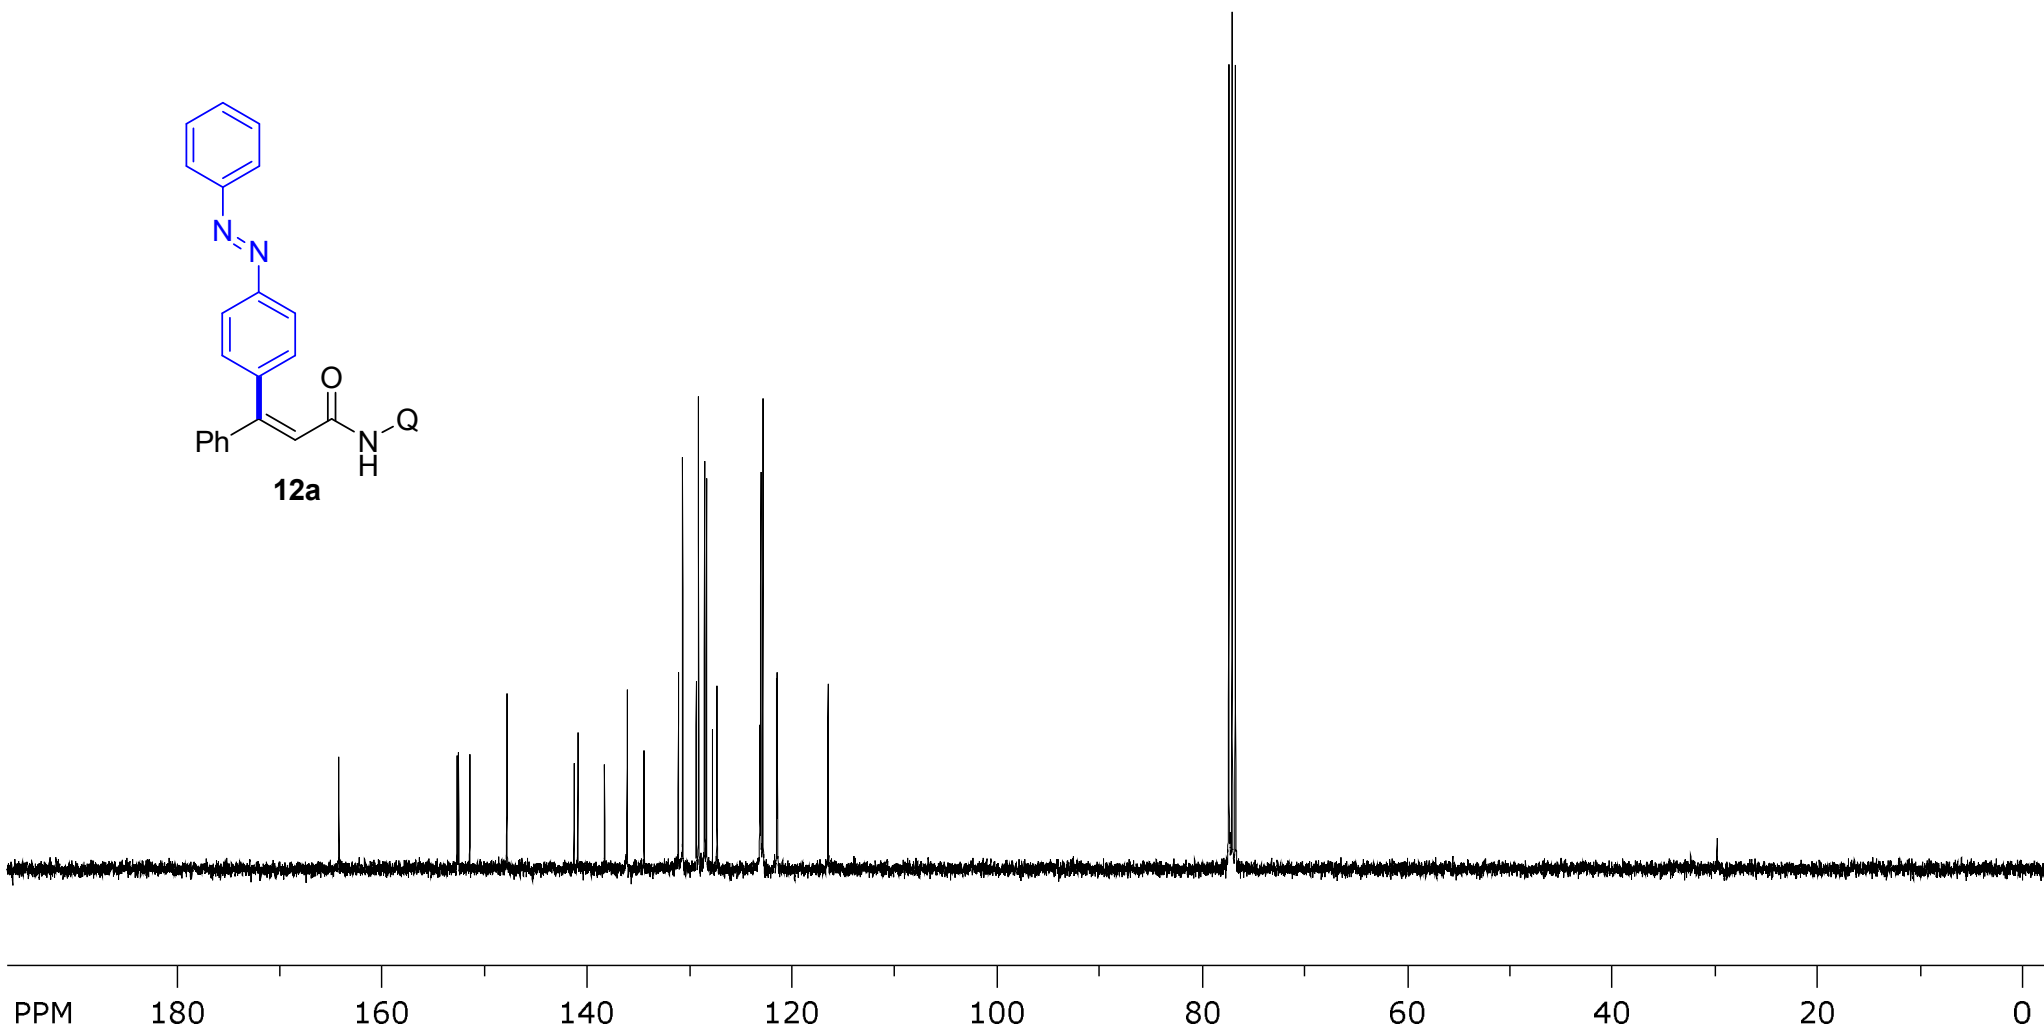

SpinWorks 4: SS 184 P  
C13CPD256 CDCl3 /opt/topspin3.5pl2/nmrdata nmrsu 59

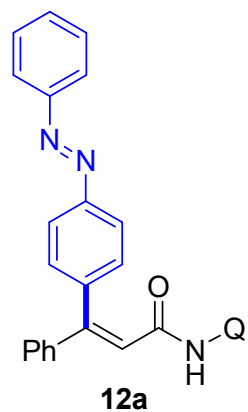

164.263 —  
151.490 —  
152.575 —  
152.735 —  
147.867 —  
140.943 —  
141.311 —  
138.335 —  
136.127 —  
134.479 —  
131.130 —  
129.706 —  
129.152 —  
128.575 —  
128.385 —  
127.805 —  
127.356 —  
123.175 —  
123.080 —  
122.883 —  
121.526 —  
121.469 —  
116.526 —

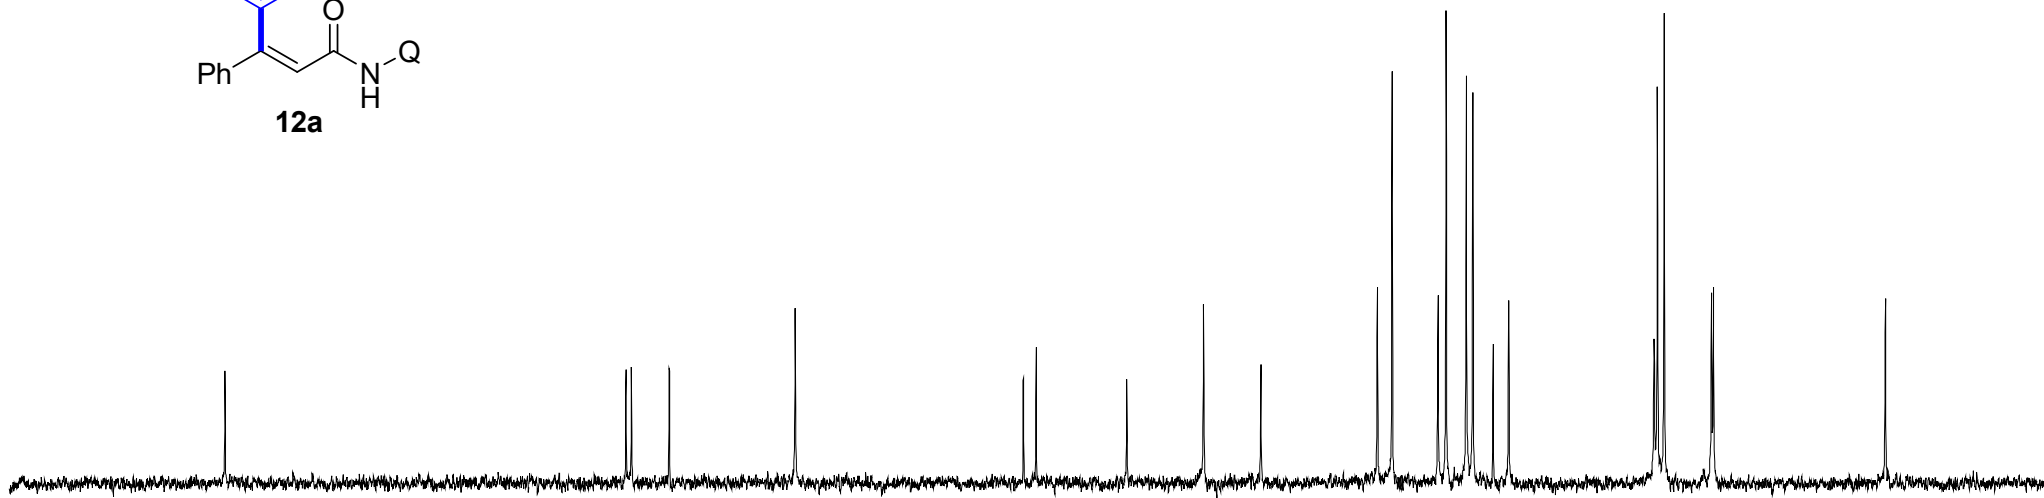

PPM

160

150

140

130

120

SpinWorks 4: DC-180

SS-185-p

6.3266  
6.3579  
6.9898  
7.0212  
7.2399  
7.3243  
7.3349  
7.3450  
7.3555  
7.9100  
7.9200  
8.0000  
8.5731  
8.5771  
8.5836  
8.5876  
8.8163  
8.8191  
8.8349  
8.8374  
9.9244

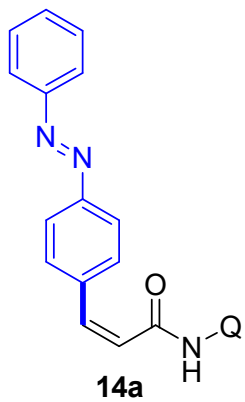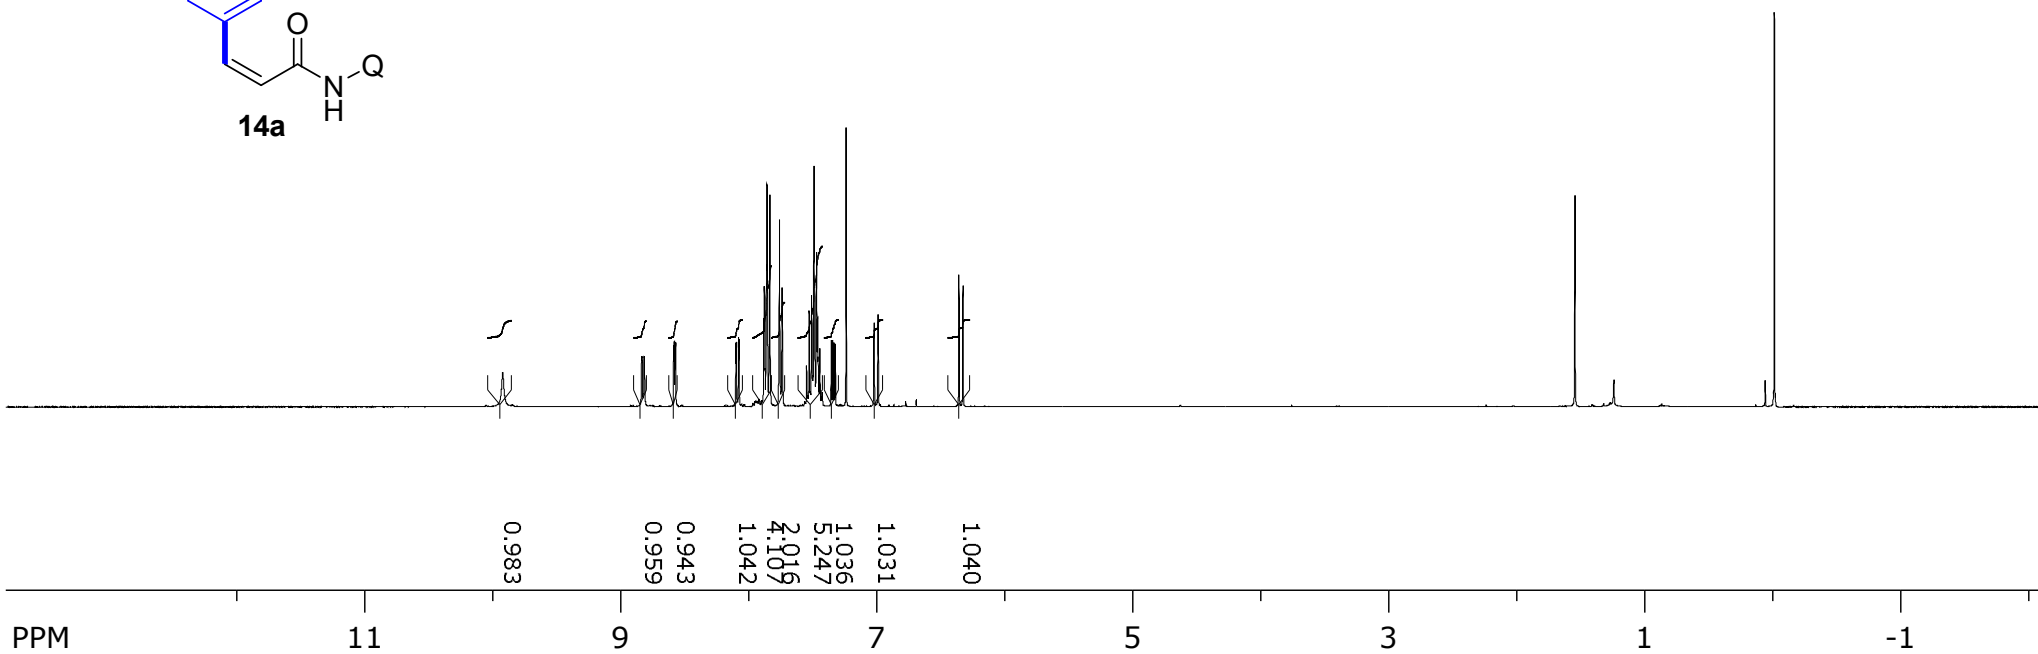



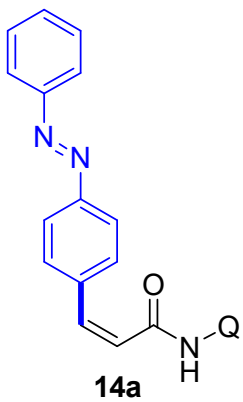

9.9244

8.8163  
8.8191  
8.8349  
8.8374

8.5731  
8.5771  
8.5836  
8.5876

8.0769  
8.0809  
8.0976  
8.1016

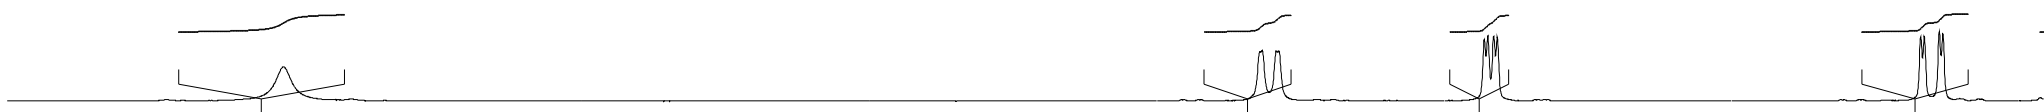

0.983

0.959

0.943

1.042

PPM

10.0

9.6

9.2

8.8

8.4

8.0

SpinWorks 4: DC-180

7.8363  
7.8407  
7.8581  
7.8618  
7.8739  
7.8787

7.7398  
7.7610

7.2399  
7.3243  
7.3349  
7.3450  
7.3555  
7.4456  
7.4527  
7.4588  
7.4626  
7.4705  
7.4898  
7.5015  
7.5094  
7.5281  
7.5485

6.9898  
7.0212

6.3266  
6.3579

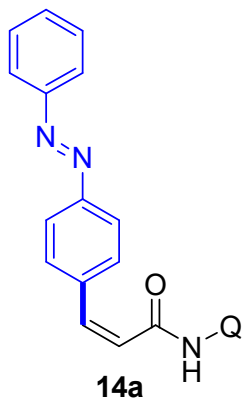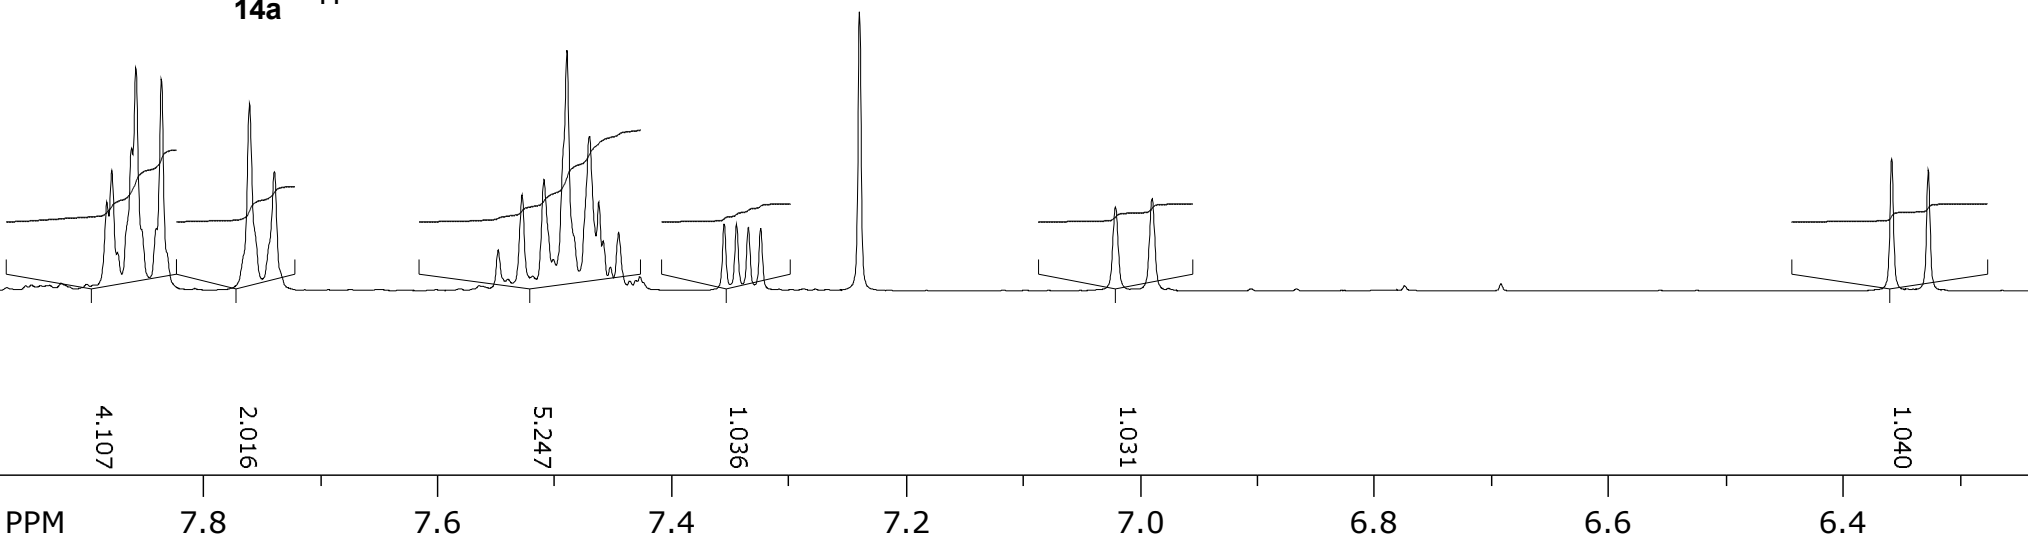

SpinWorks 4: SS 185 P  
C13CPD256 CDCl3 /opt/topspin3.5pl2/nmrdata nmrsu 60

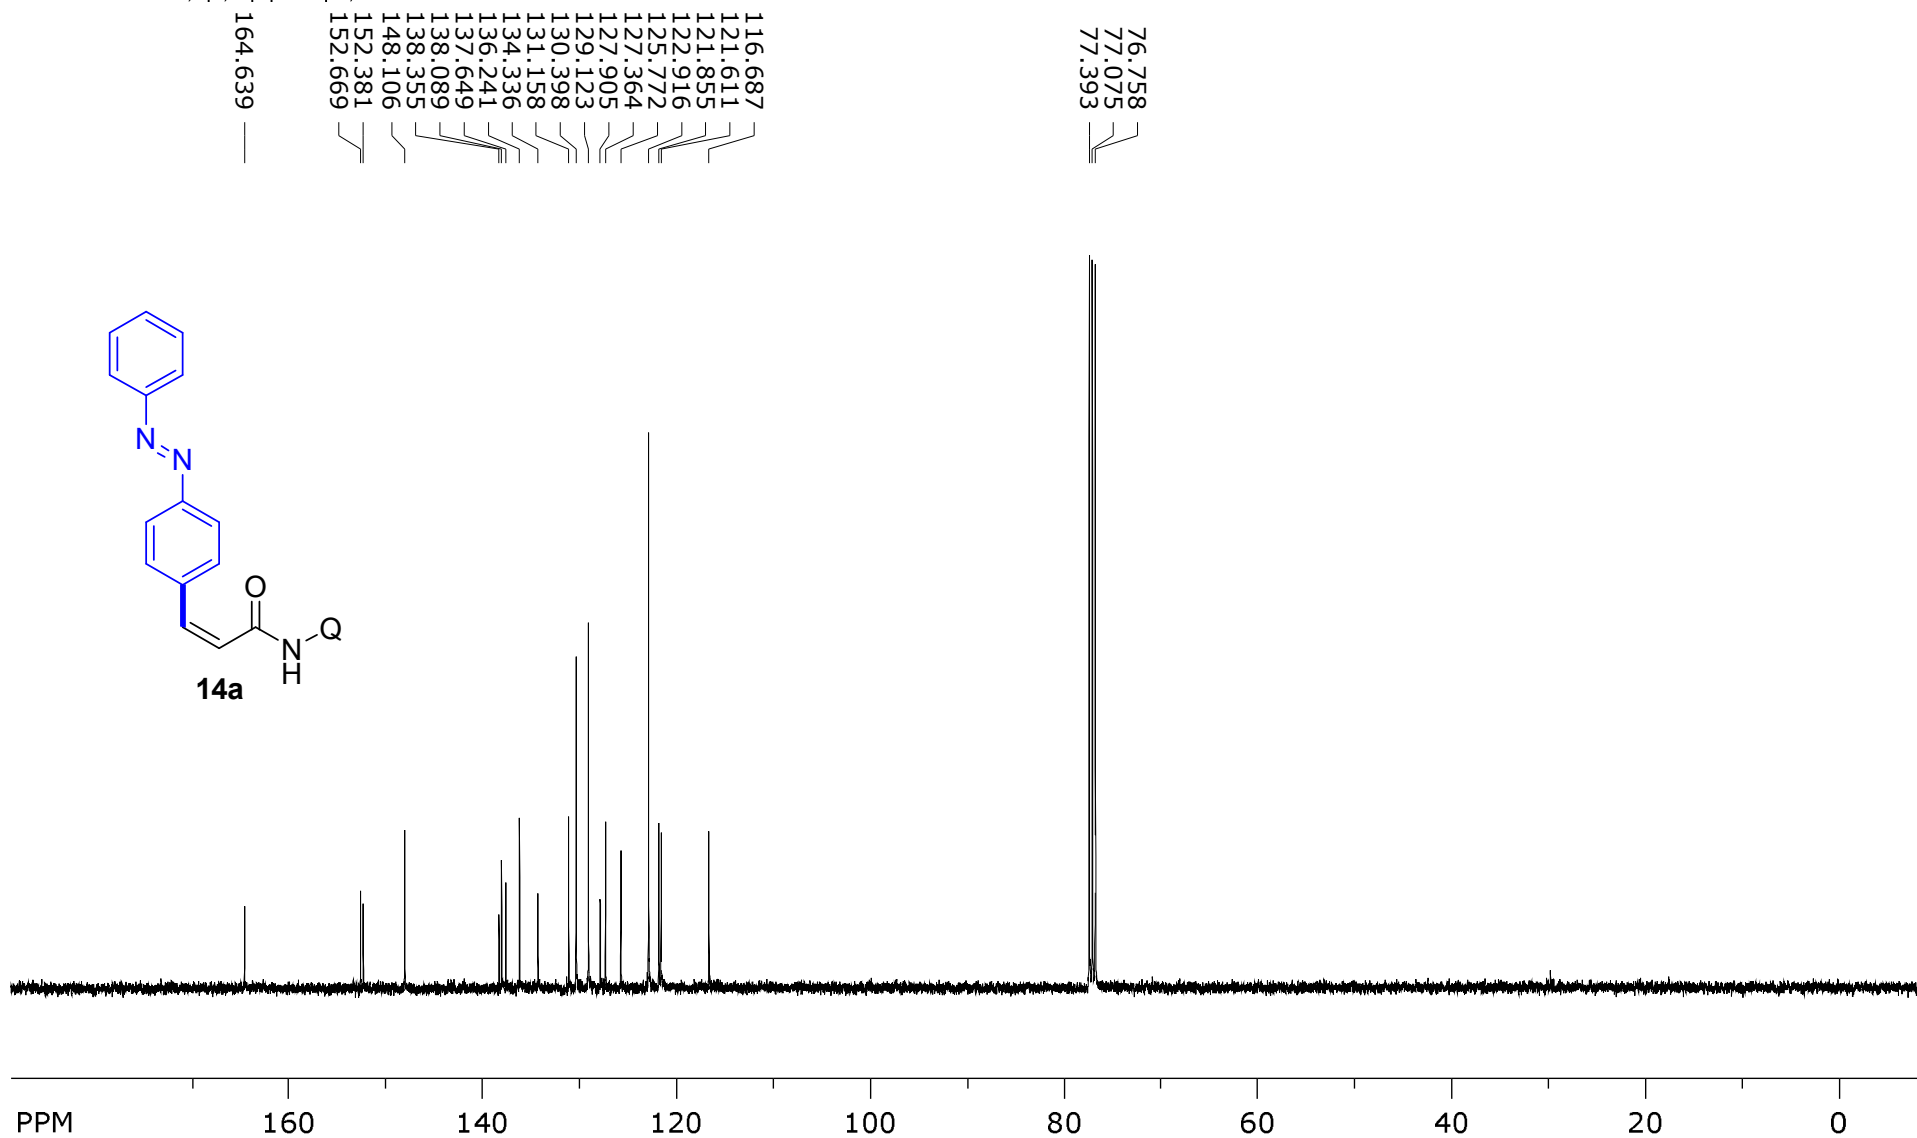

SS-116-p

6.9555  
6.9735  
6.9936  
7.0446  
7.0650  
7.2537  
7.2634  
7.2835  
7.2836  
7.2837  
7.2838  
7.2839  
7.2840  
7.2841  
7.2842  
7.2843  
7.2844  
7.2845  
7.2846  
7.2847  
7.2848  
7.2849  
7.2850  
7.2851  
7.2852  
7.2853  
7.2854  
7.2855  
7.2856  
7.2857  
7.2858  
7.2859  
7.2860  
7.2861  
7.2862  
7.2863  
7.2864  
7.2865  
7.2866  
7.2867  
7.2868  
7.2869  
7.2870  
7.2871  
7.2872  
7.2873  
7.2874  
7.2875  
7.2876  
7.2877  
7.2878  
7.2879  
7.2880  
7.2881  
7.2882  
7.2883  
7.2884  
7.2885  
7.2886  
7.2887  
7.2888  
7.2889  
7.2890  
7.2891  
7.2892  
7.2893  
7.2894  
7.2895  
7.2896  
7.2897  
7.2898  
7.2899  
7.2900  
7.2901  
7.2902  
7.2903  
7.2904  
7.2905  
7.2906  
7.2907  
7.2908  
7.2909  
7.2910  
7.2911  
7.2912  
7.2913  
7.2914  
7.2915  
7.2916  
7.2917  
7.2918  
7.2919  
7.2920  
7.2921  
7.2922  
7.2923  
7.2924  
7.2925  
7.2926  
7.2927  
7.2928  
7.2929  
7.2930  
7.2931  
7.2932  
7.2933  
7.2934  
7.2935  
7.2936  
7.2937  
7.2938  
7.2939  
7.2940  
7.2941  
7.2942  
7.2943  
7.2944  
7.2945  
7.2946  
7.2947  
7.2948  
7.2949  
7.2950  
7.2951  
7.2952  
7.2953  
7.2954  
7.2955  
7.2956  
7.2957  
7.2958  
7.2959  
7.2960  
7.2961  
7.2962  
7.2963  
7.2964  
7.2965  
7.2966  
7.2967  
7.2968  
7.2969  
7.2970  
7.2971  
7.2972  
7.2973  
7.2974  
7.2975  
7.2976  
7.2977  
7.2978  
7.2979  
7.2980  
7.2981  
7.2982  
7.2983  
7.2984  
7.2985  
7.2986  
7.2987  
7.2988  
7.2989  
7.2990  
7.2991  
7.2992  
7.2993  
7.2994  
7.2995  
7.2996  
7.2997  
7.2998  
7.2999  
8.0325  
8.0325  
8.4975  
8.4975  
8.5015  
8.5015  
8.5080  
8.5080  
8.5120  
8.5120  
8.7978  
8.7978  
8.7998  
8.7998  
8.8167  
8.8167  
8.8186  
8.8186  
9.8107  
9.8107

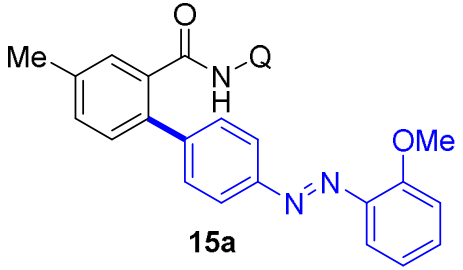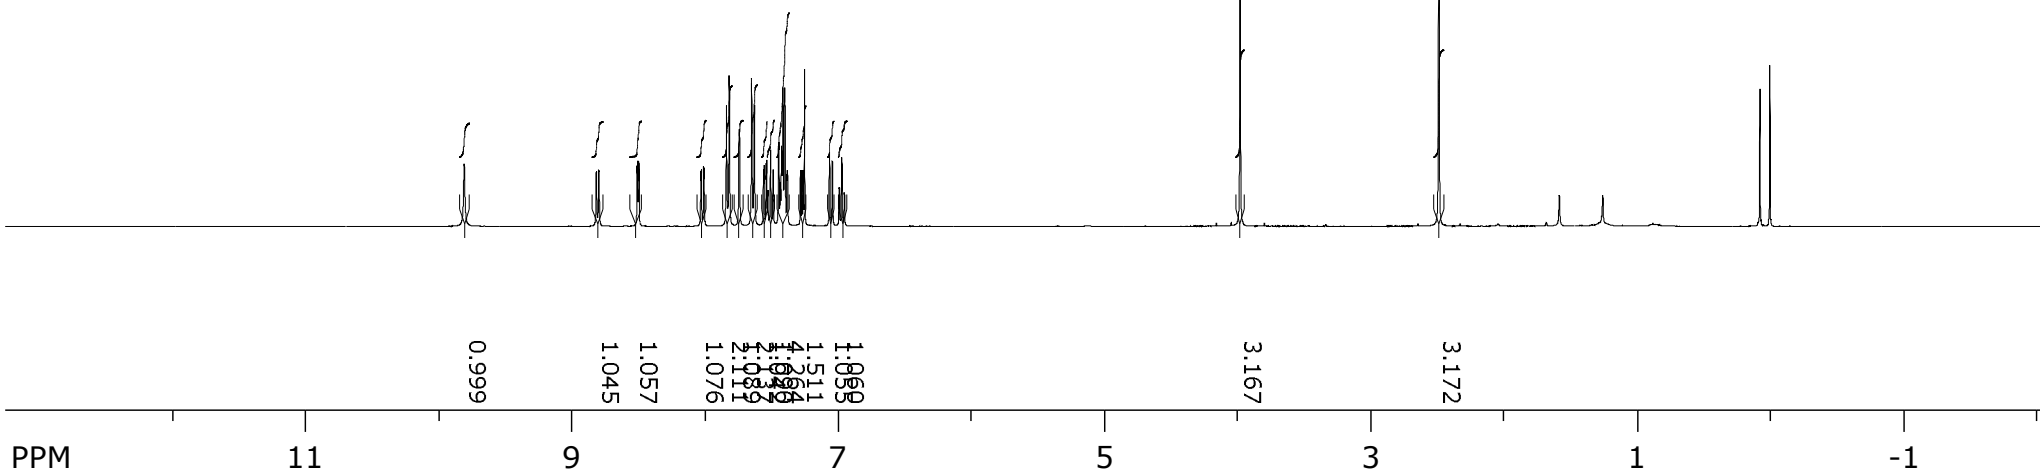

9.8107

8.7978  
8.7998  
8.8167  
8.8186

8.4975  
8.5015  
8.5080  
8.5120

8.0080  
8.0118  
8.0286  
8.0325

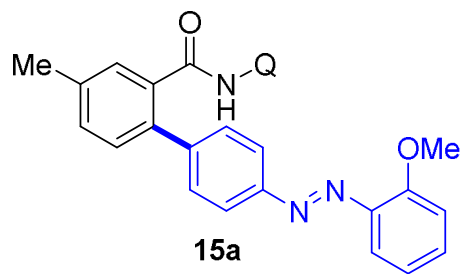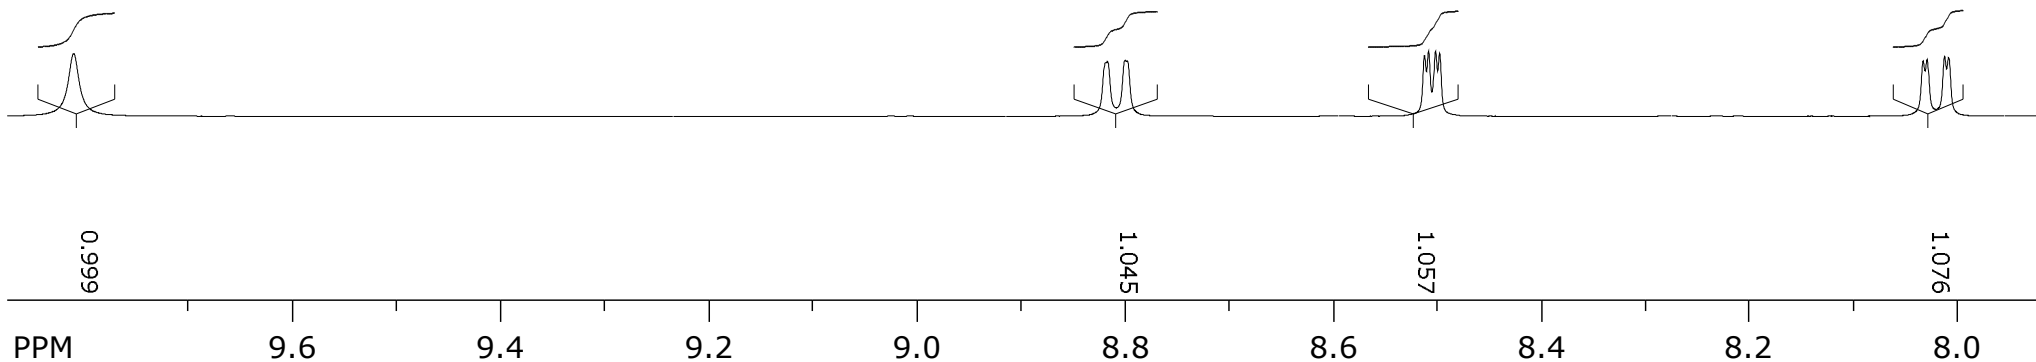

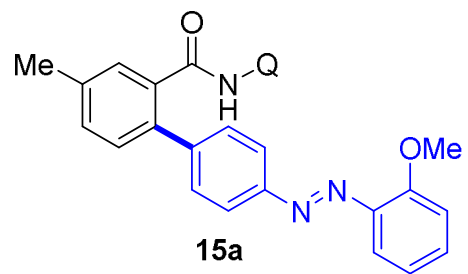

7.8193  
7.8402

7.7438

7.6301  
7.6510

7.5621  
7.5580  
7.5421  
7.5381  
7.5289  
7.5087  
7.4892

7.4483  
7.4455  
7.4351  
7.4249  
7.4156  
7.4033  
7.3818  
7.3856

7.2840  
7.2735  
7.2634  
7.2537

7.0650  
7.0446

6.9936  
6.9735  
6.9555

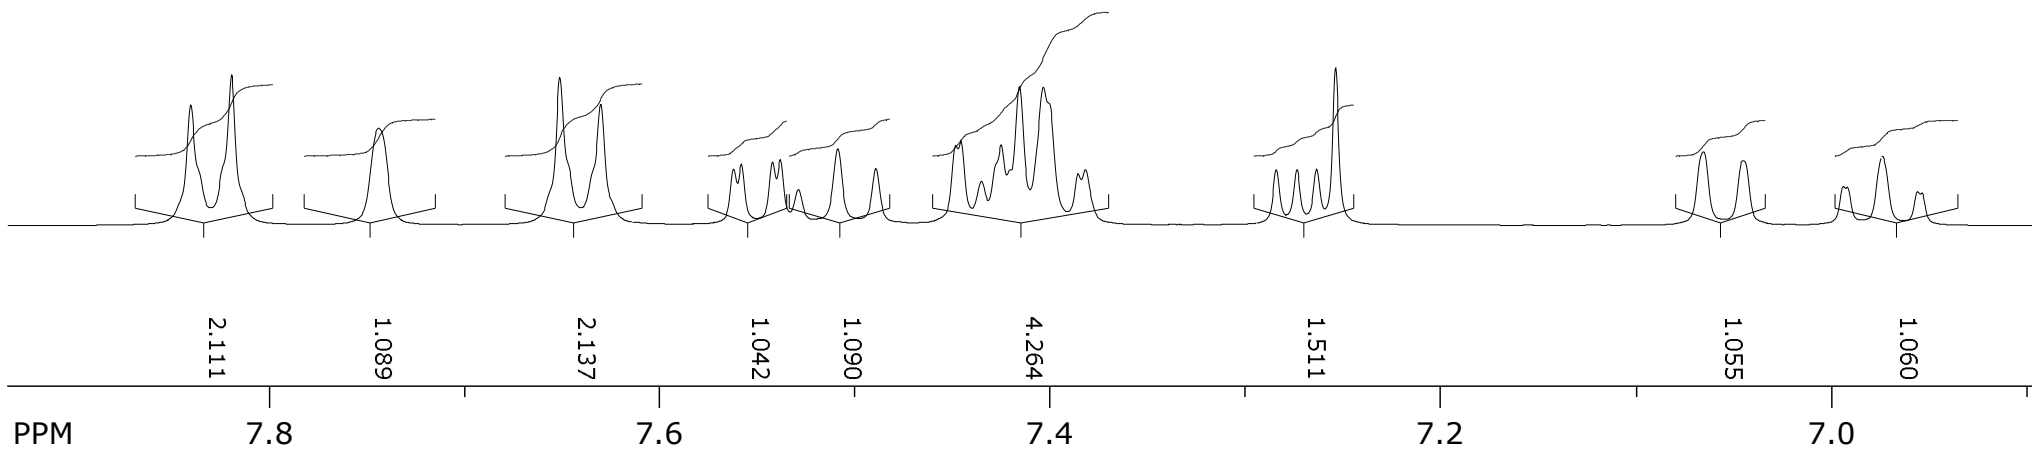

SpinWorks 4: SV100702  
C13CPD CDCl3 {D:\Spectra} nmr 2

167.752 —  
156.862 —  
152.202 —  
147.893 —  
142.547 —  
138.350 —  
138.061 —  
136.463 —  
135.940 —  
134.408 —  
132.351 —  
129.992 —  
129.592 —  
127.708 —  
127.180 —  
123.110 —  
121.605 —  
121.348 —  
120.691 —  
116.827 —  
116.349 —  
112.675 —  
76.745 —  
77.000 —  
77.254 —  
56.278 —  
21.077 —

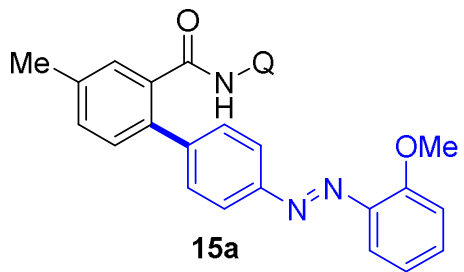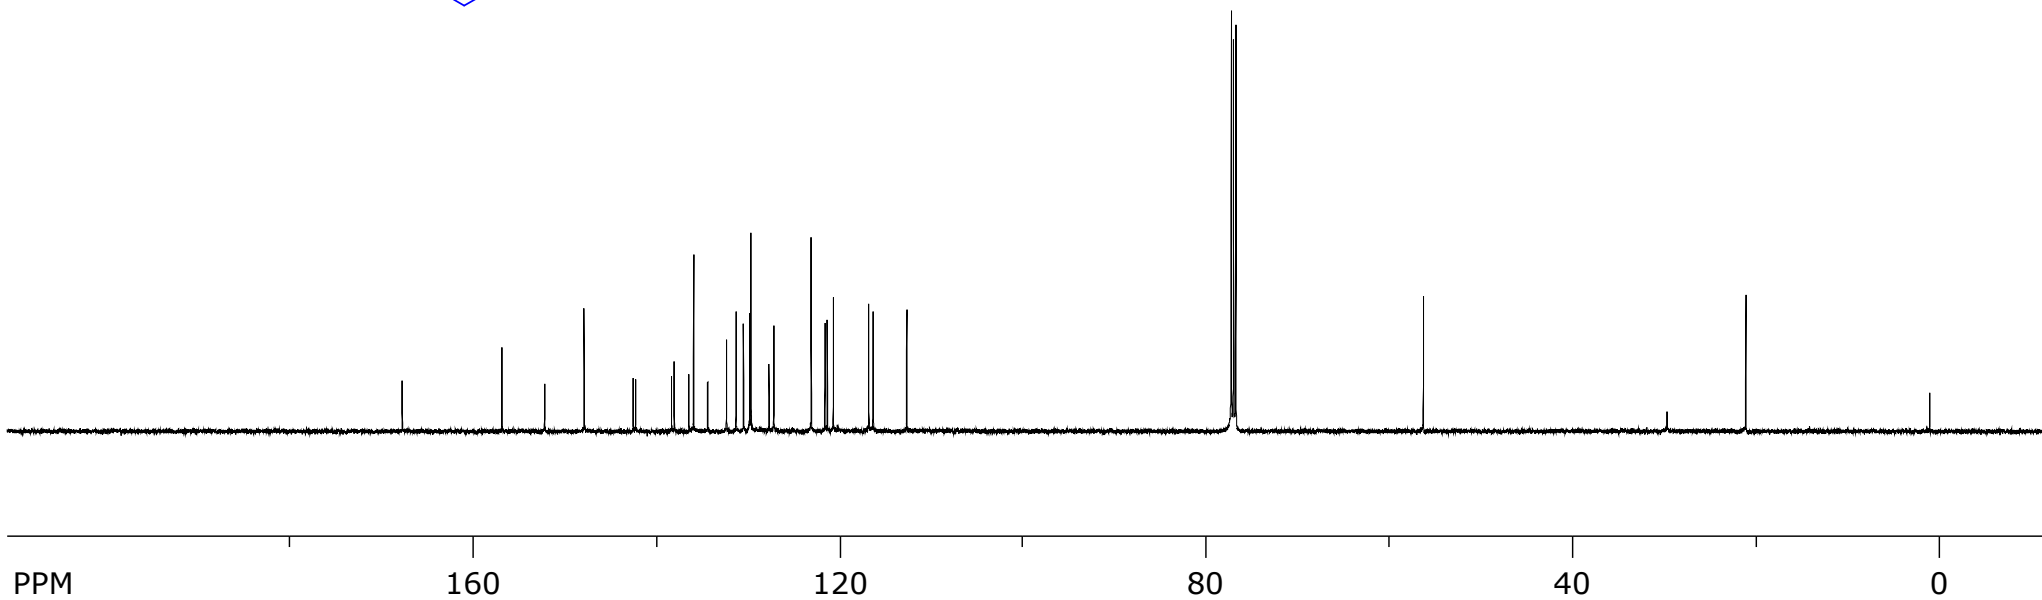

SpinWorks 4: SV100702  
C13CPD CDCl3 {D:\Spectra} nmr 2

167.752 —  
156.862 —  
152.202 —  
147.893 —  
142.275 —  
142.547 —  
138.061 —  
138.350 —  
136.463 —  
135.940 —  
134.408 —  
132.351 —  
131.311 —  
130.504 —  
129.840 —  
129.692 —  
127.708 —  
127.180 —  
123.110 —  
121.605 —  
121.348 —  
120.691 —  
116.827 —  
116.349 —  
112.675 —

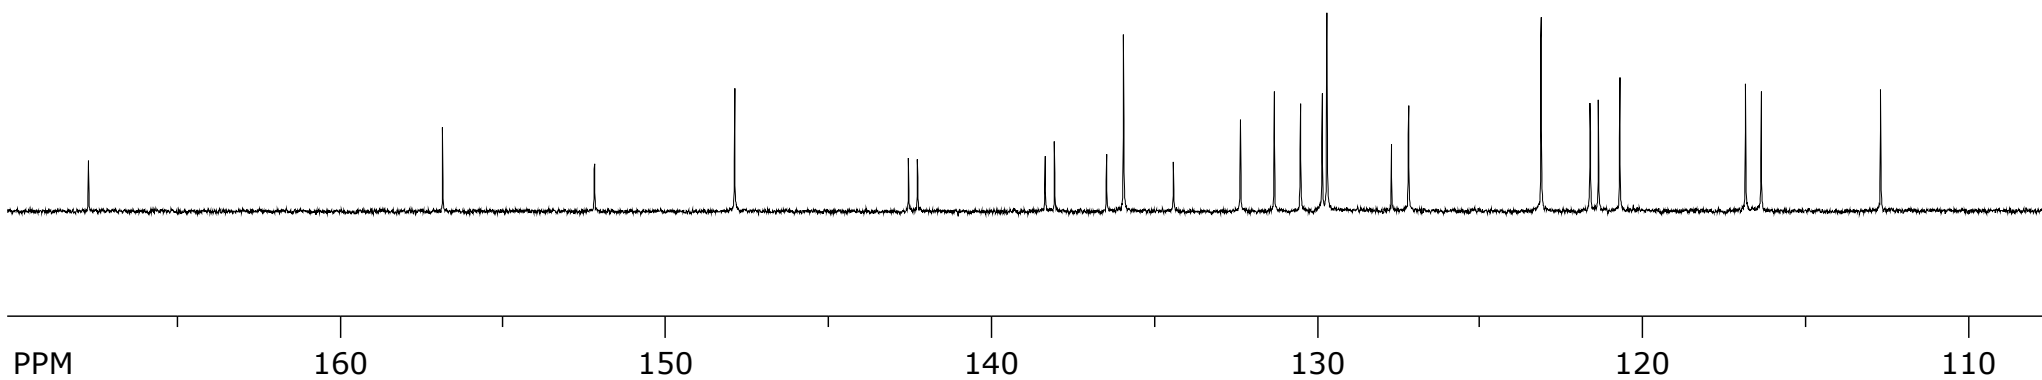



SpinWorks 4: SS-198(ii)  
{PROTON 64} CDCl3 /opt/topspin3.5pl2/nmrdata nmrsu 1

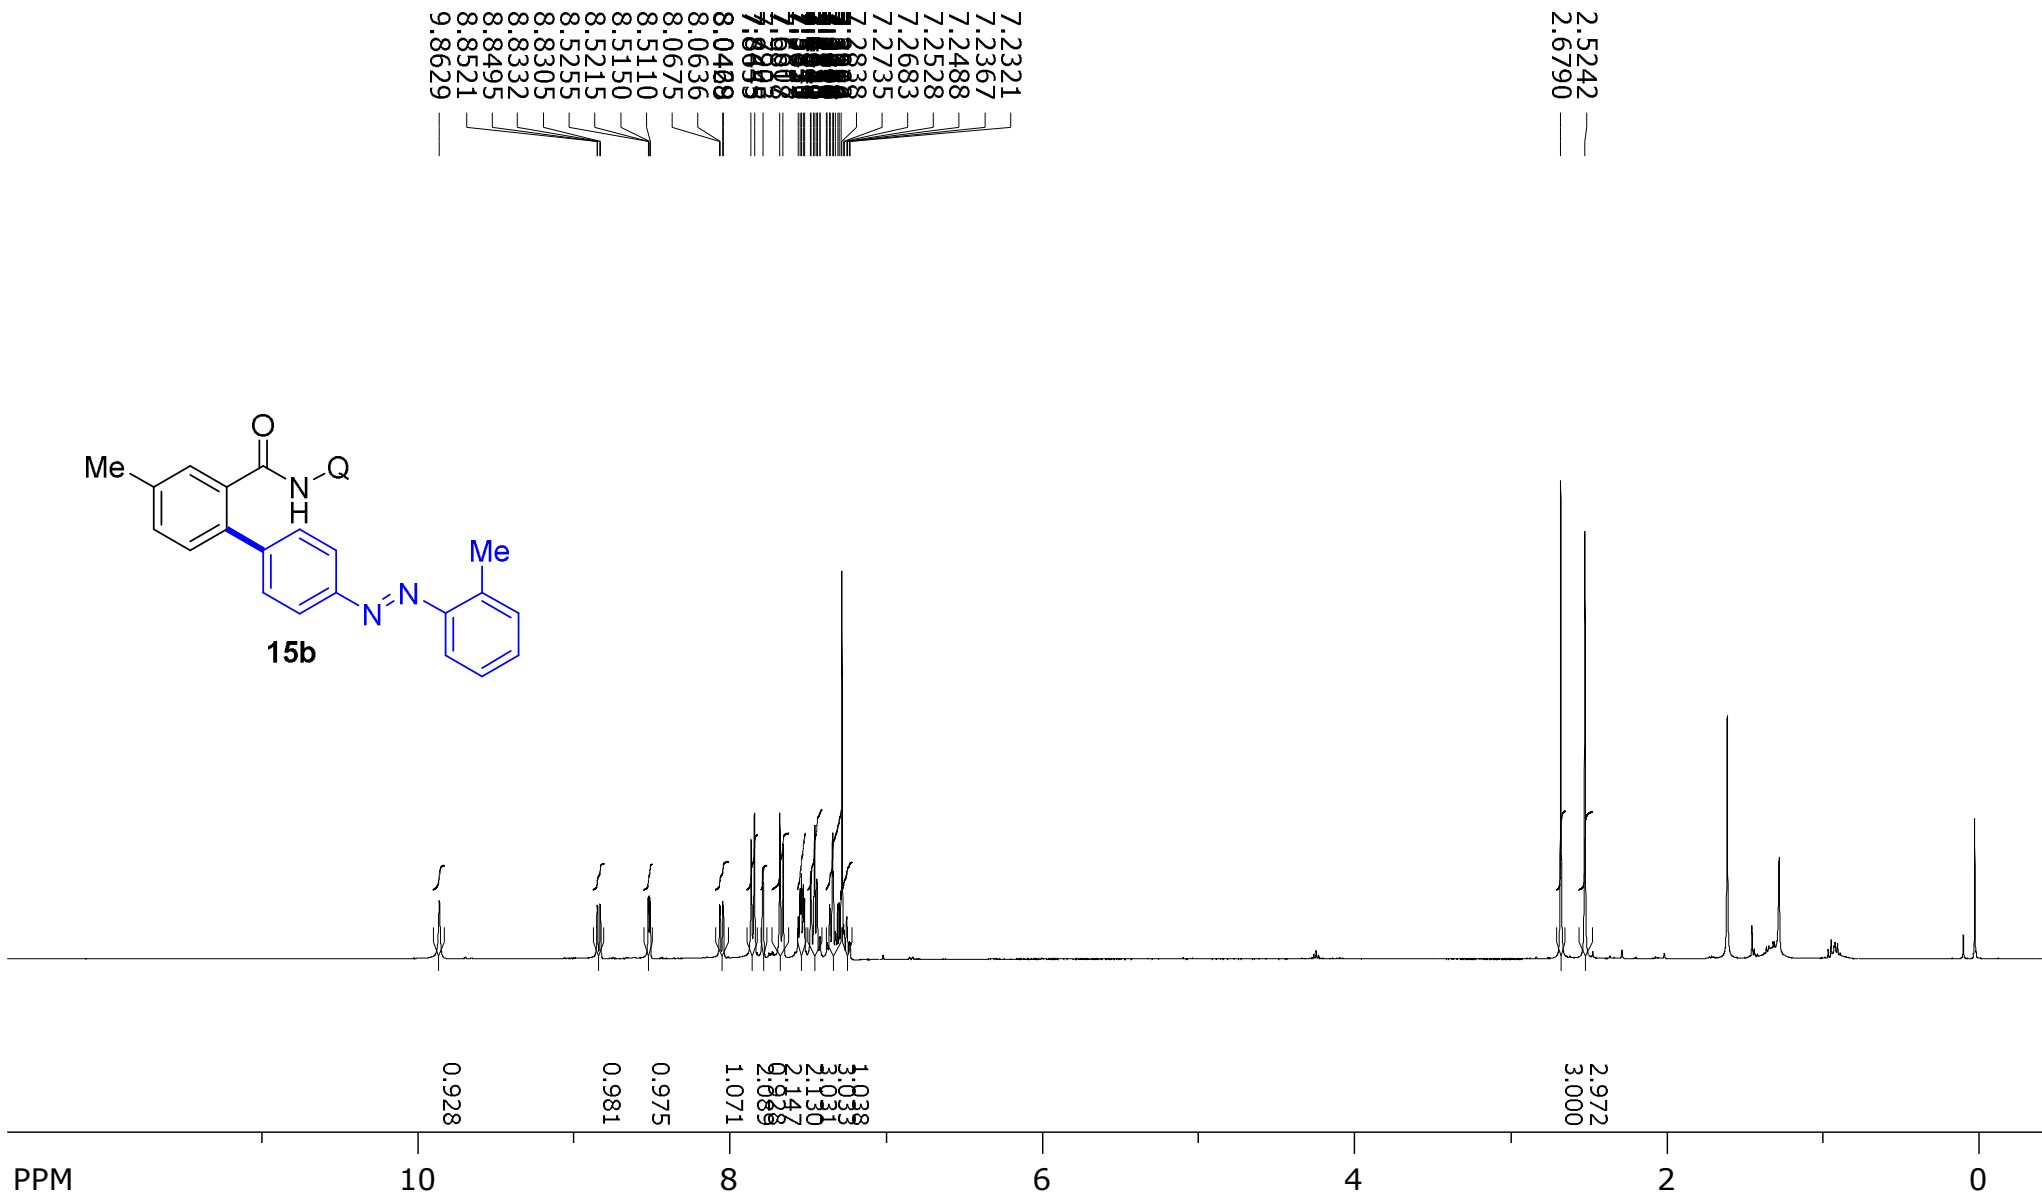

SpinWorks 4: SS-198(ii)  
{PROTON 64} CDCl3 /opt/topspin3.5pl2/nmrdata nmrsu 1

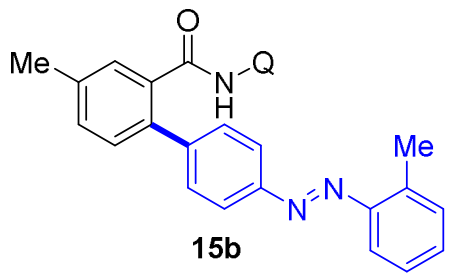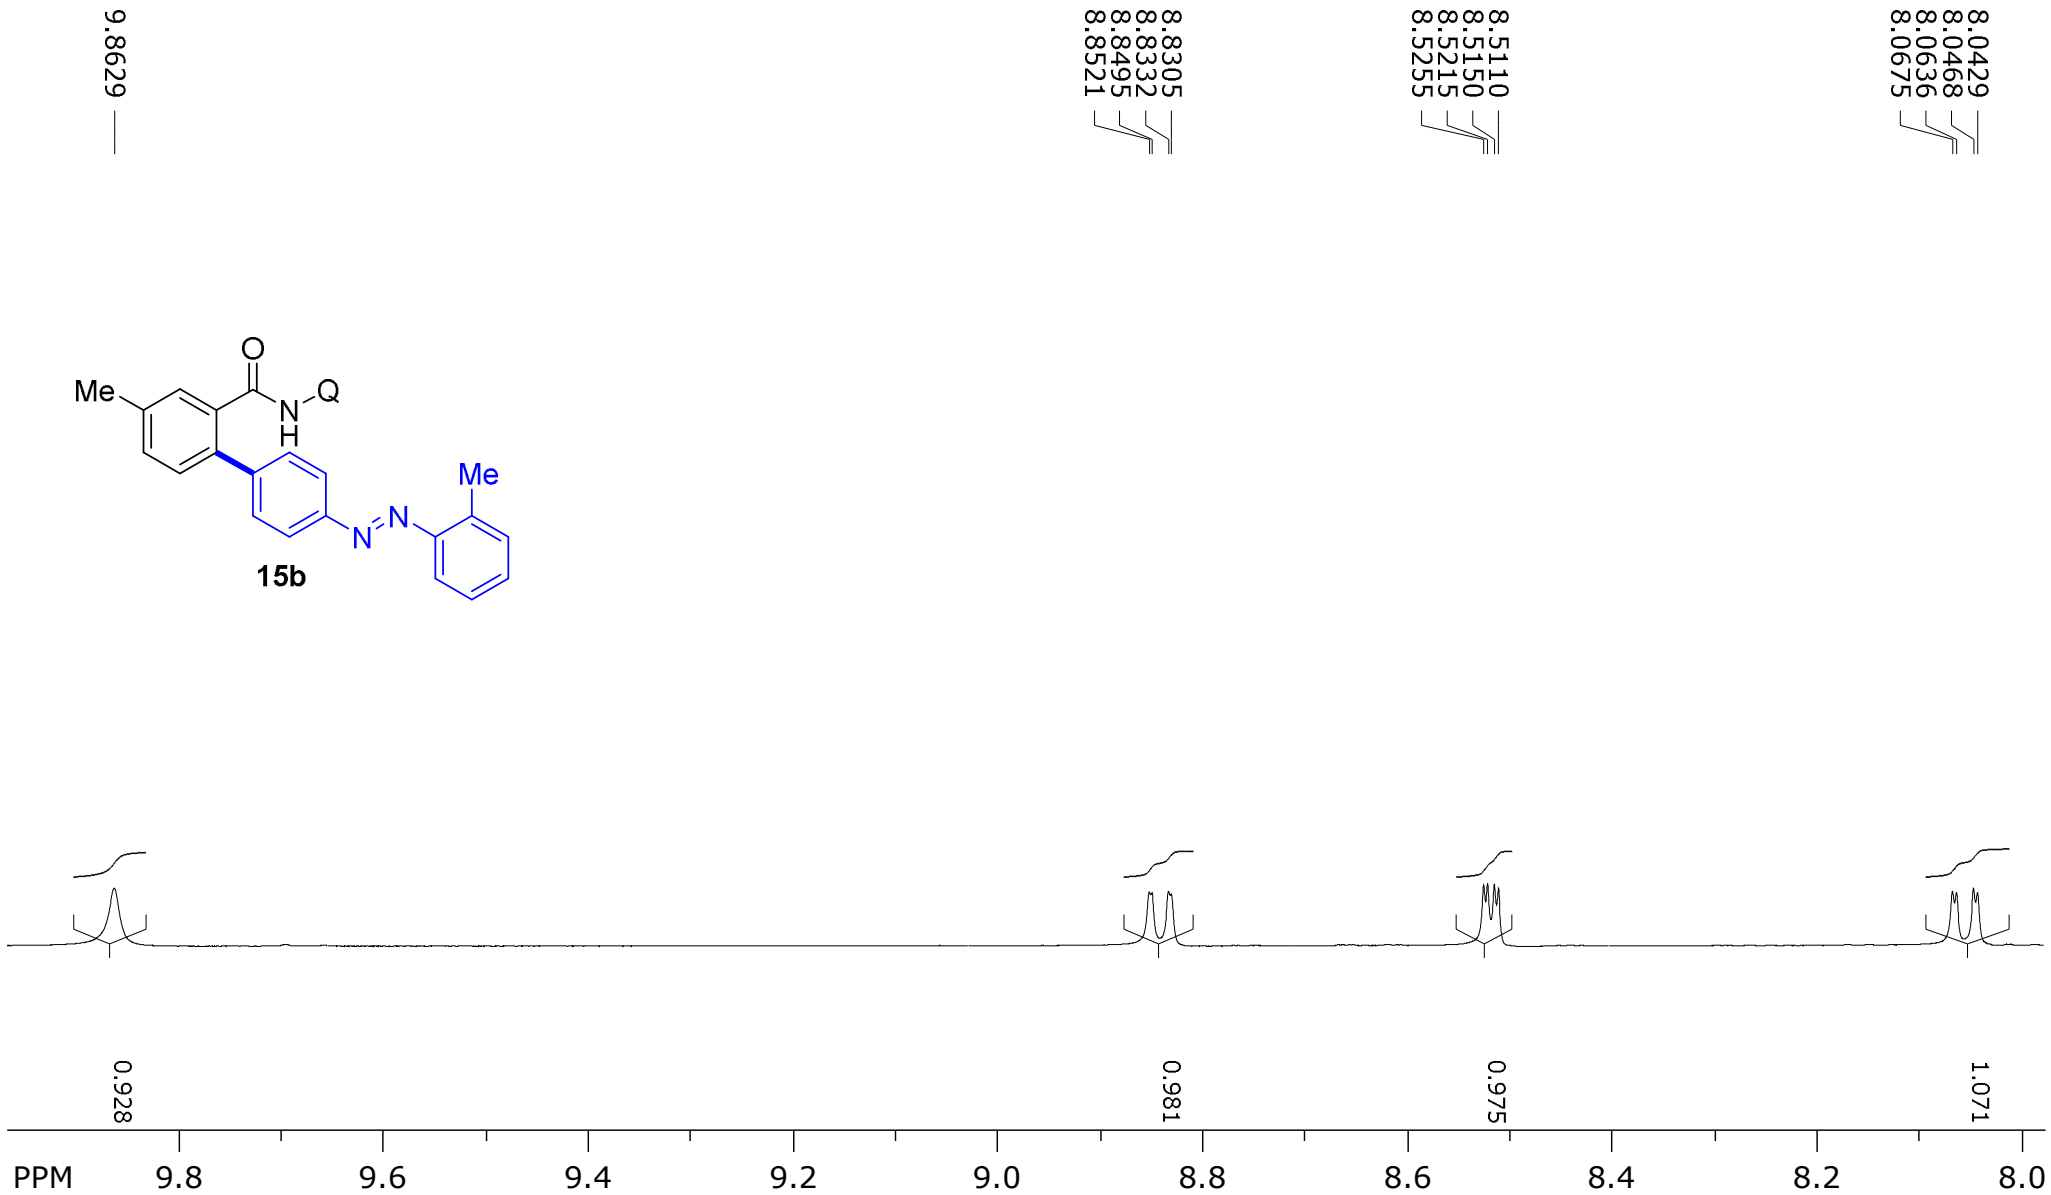

SpinWorks 4: SS-198(ii)  
{PROTON 64} CDCl3 /opt/topspin3.5pl2/nmrdata nmrsu 1

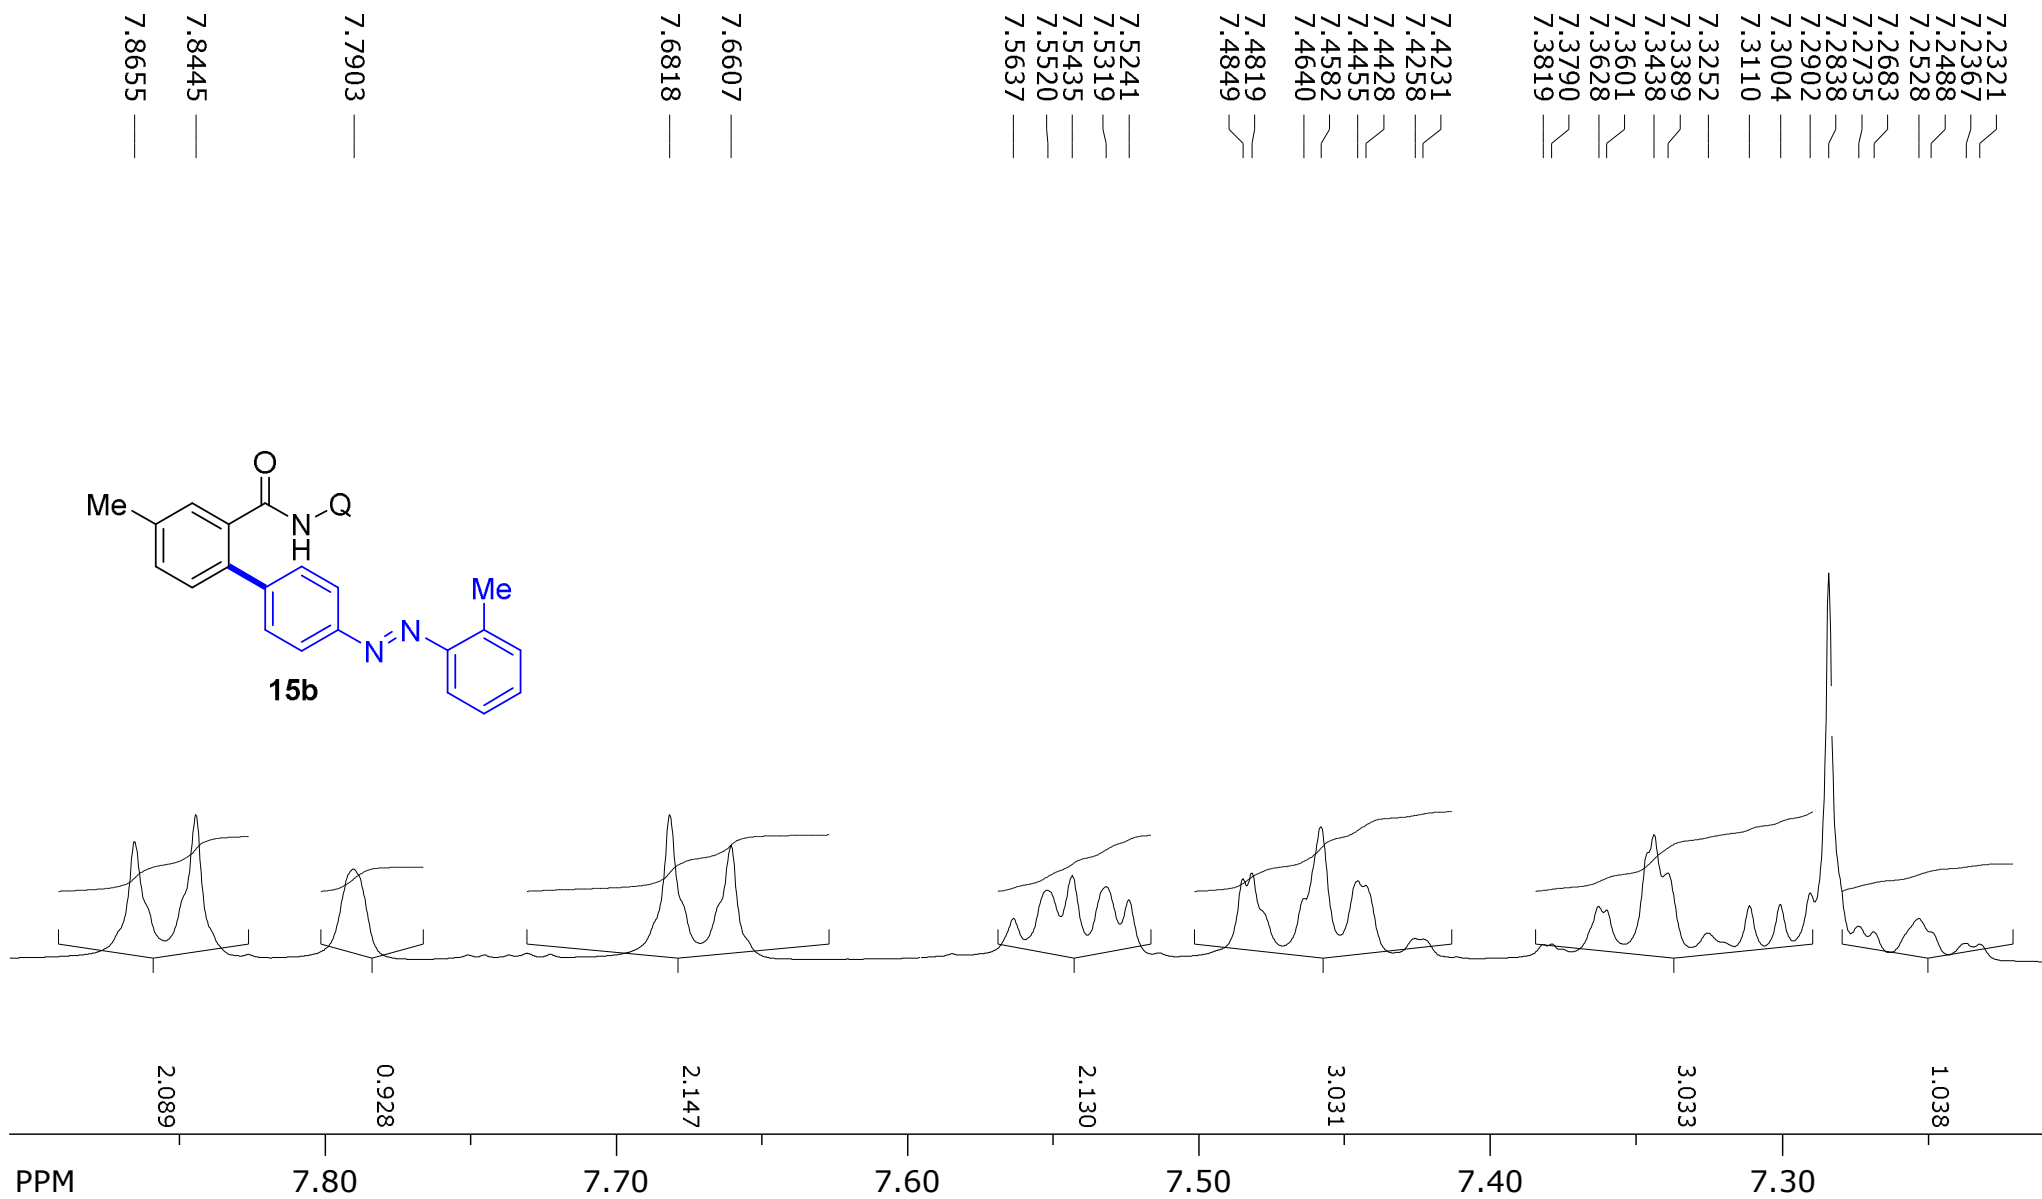

SpinWorks 4: SS-198-REP  
C13CPD256 CDCl3 /opt/topspin3.5pl2/nmrdata nmrsu 23

115.334  
116.422  
121.403  
121.675  
123.123  
126.410  
127.264  
127.754  
129.812  
130.812  
131.812  
134.489  
134.989  
136.024  
136.613  
138.053  
138.168  
138.428  
142.636  
147.868  
150.766  
152.201  
167.803

76.740  
77.057  
77.375

17.524  
21.167

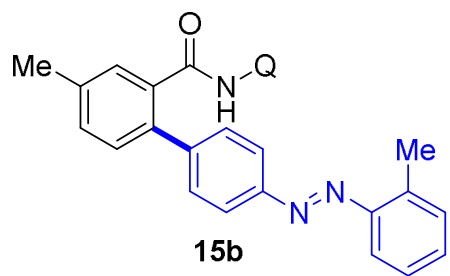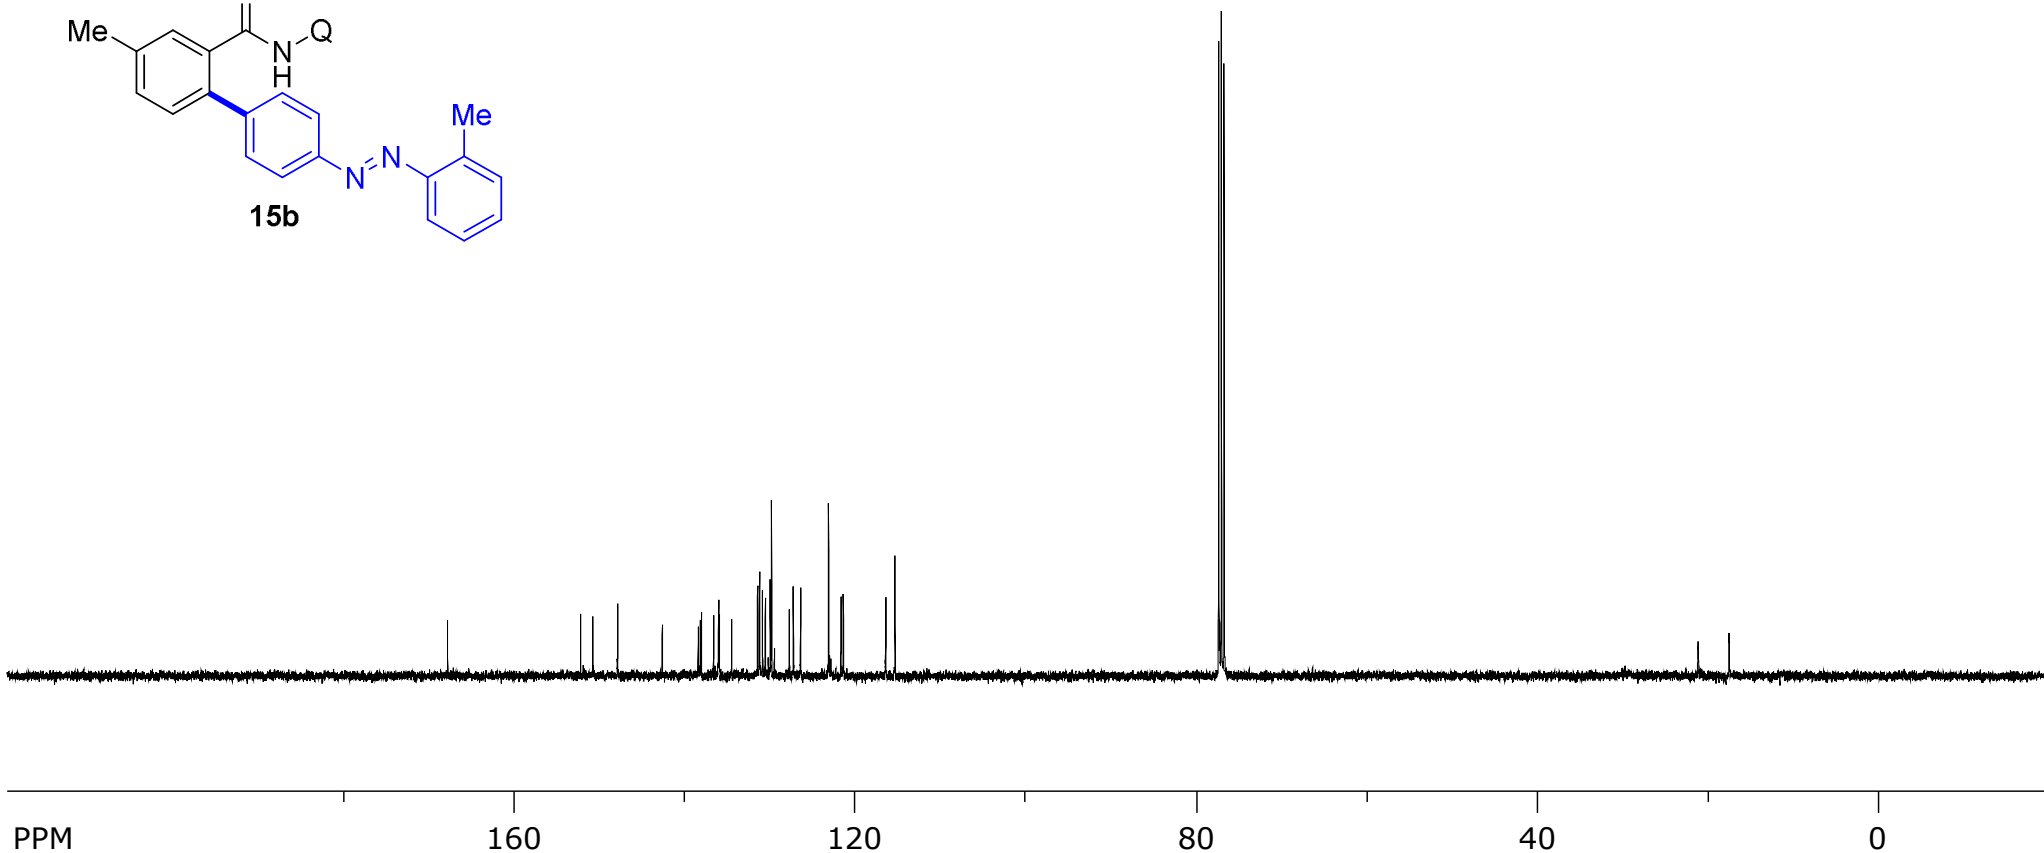

PPM

SpinWorks 4: SS-198-REP  
C13CPD256 CDCl3 /opt/topspin3.5pl2/nmrdata nmrsu 23

167.803 —  
152.201 —  
150.766 —  
147.868 —  
142.636 —  
138.428 —  
138.168 —  
138.053 —  
136.613 —  
136.024 —  
135.934 —  
134.489 —  
131.452 —  
131.221 —  
130.889 —  
130.552 —  
129.963 —  
129.812 —  
127.754 —  
127.264 —  
126.410 —  
123.123 —  
121.675 —  
121.403 —  
116.422 —  
115.334 —

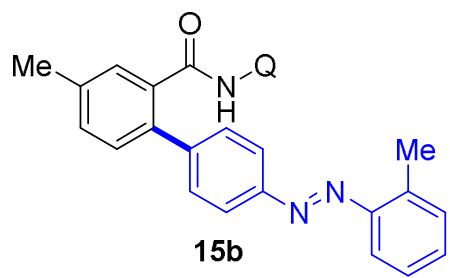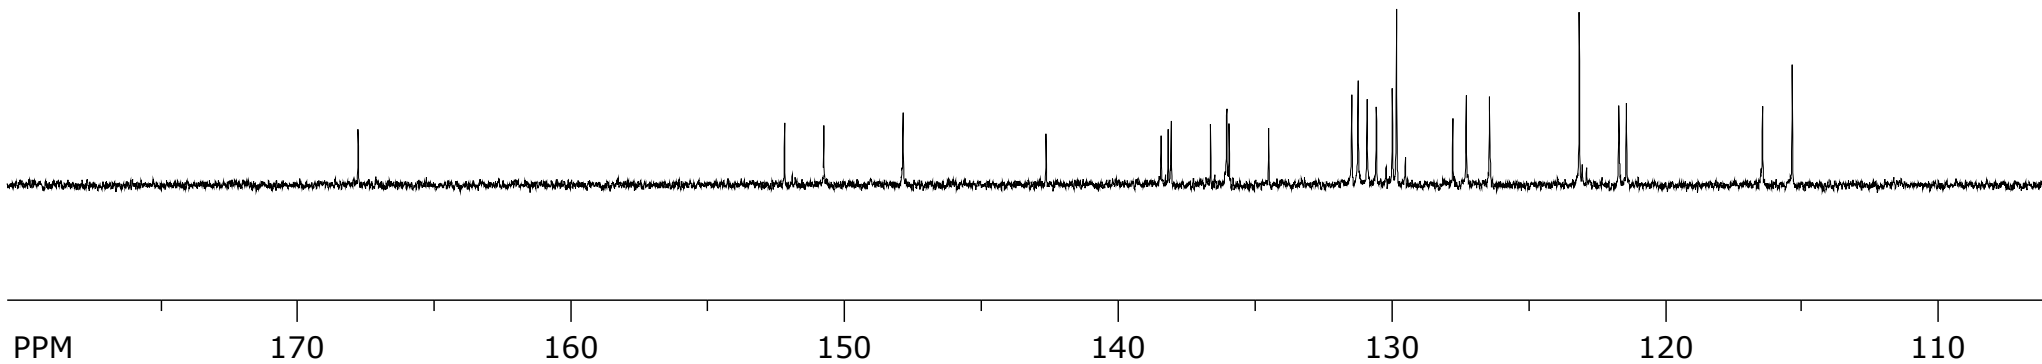

SpinWorks 4: SS-117-P REP  
PROTON CDCl3 /opt/topspin3.5pl2/nmrdata nmrsu 5

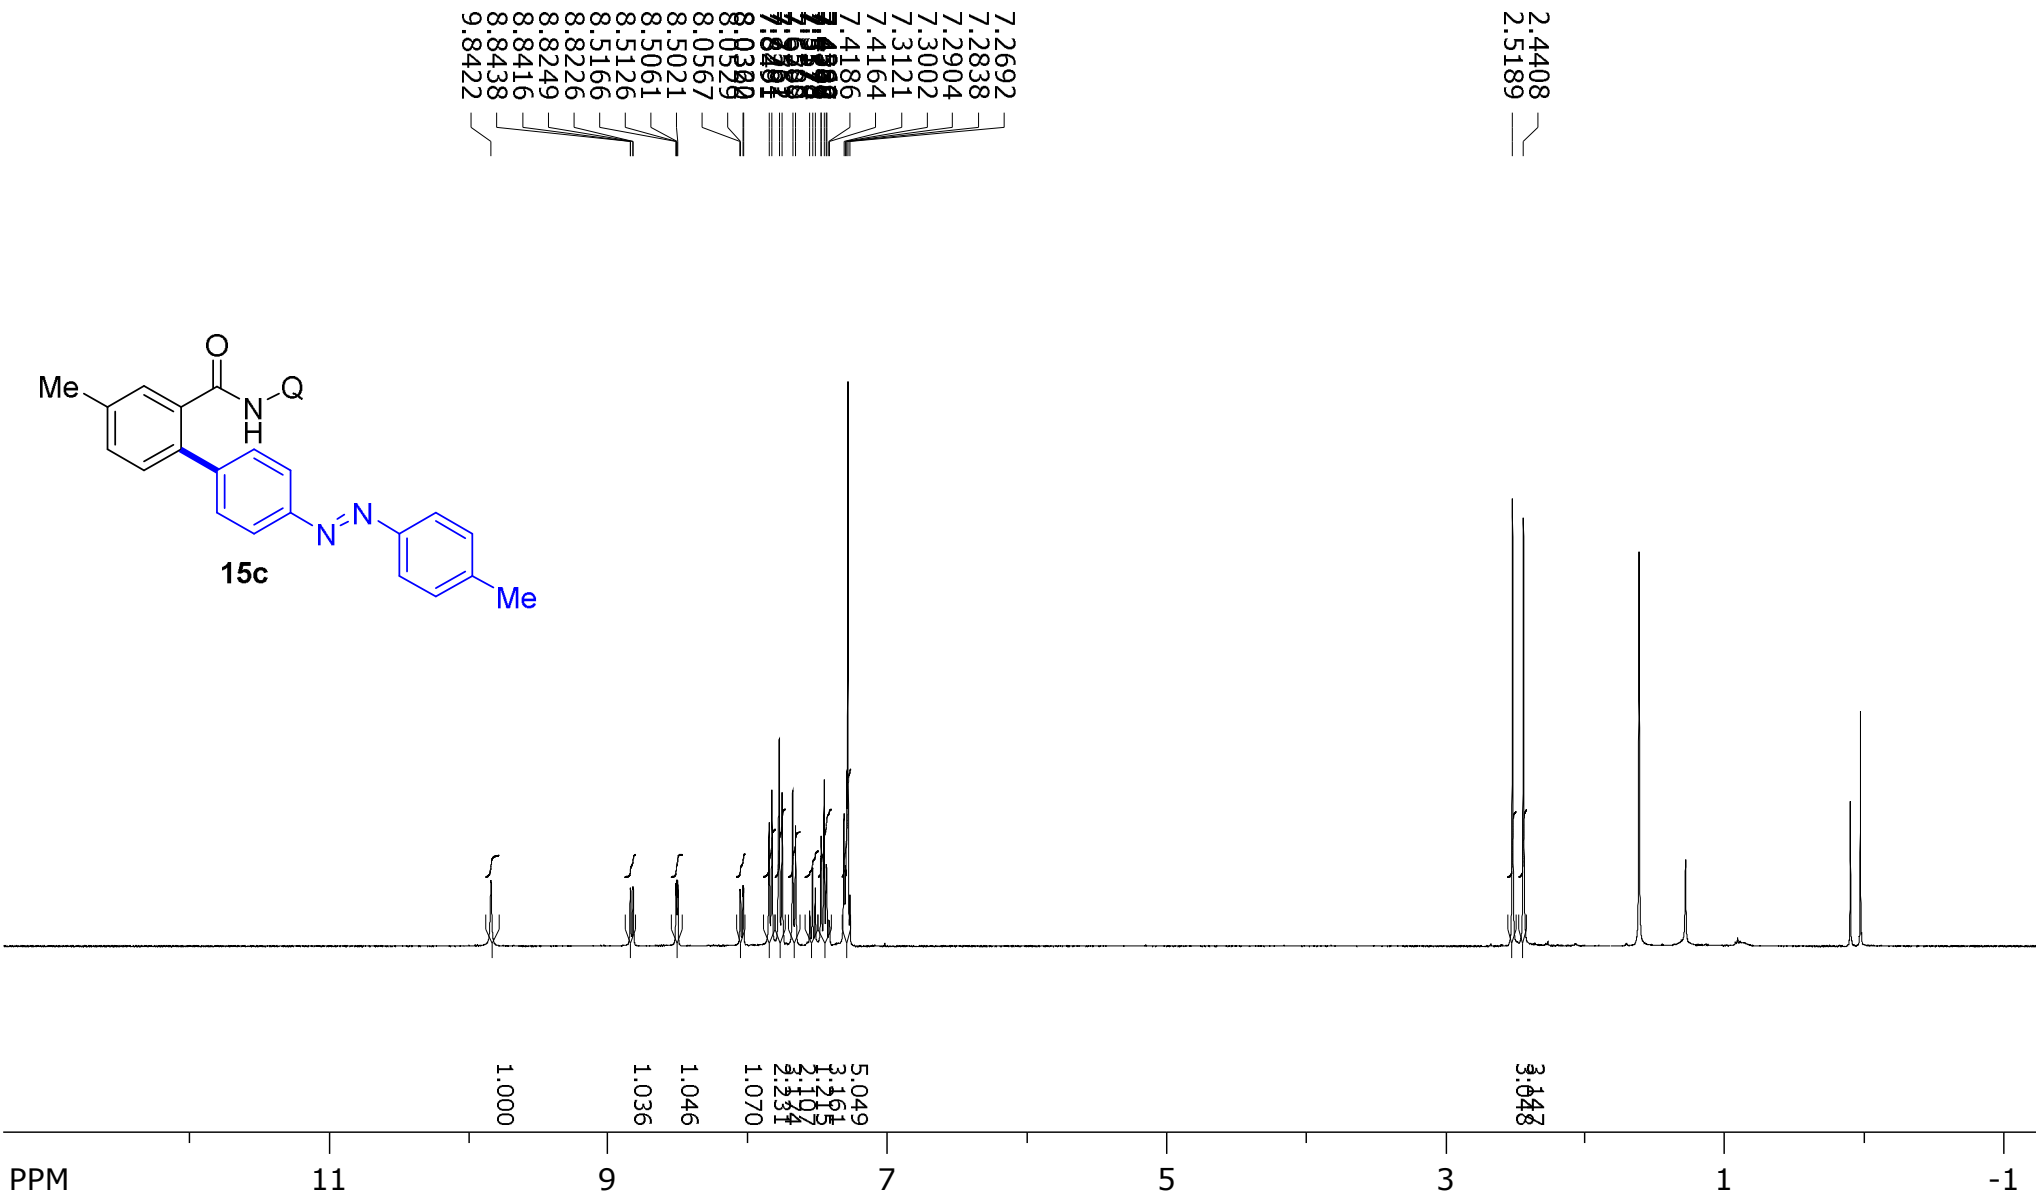

SpinWorks 4: SS-117-P REP  
PROTON CDCl3 /opt/topspin3.5pl2/nmrdata nmrsu 5

8.8226  
8.8249  
8.8416  
8.8438

8.5021  
8.5061  
8.5126  
8.5166

8.0322  
8.0360  
8.0529  
8.0567

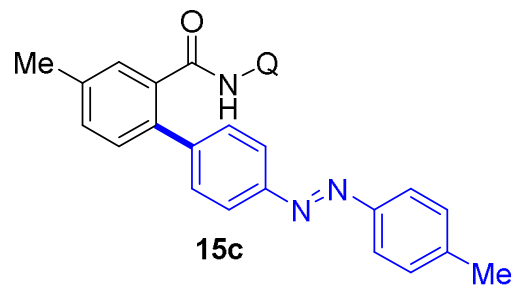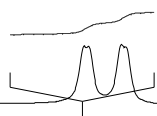

1.036

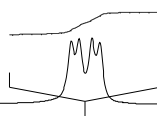

1.046

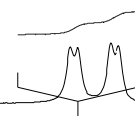

1.070

PPM

8.8

8.6

8.4

8.2

8.0

SpinWorks 4: SS-117-P REP  
PROTON CDCl3 /opt/topspin3.5pl2/nmrdata nmrsu 5

7.8491 —  
7.8281 —  
7.7762 —  
7.7551 —  
7.6799 —  
7.6588 —  
7.5574 —  
7.5373 —  
7.5178 —  
7.4776 —  
7.4747 —  
7.4538 —  
7.4387 —  
7.4360 —  
7.4186 —  
7.4164 —  
7.3121 —  
7.3002 —  
7.2904 —  
7.2838 —  
7.2692 —

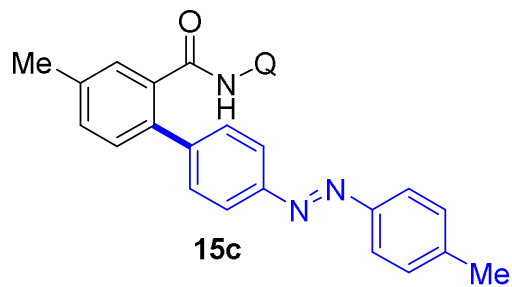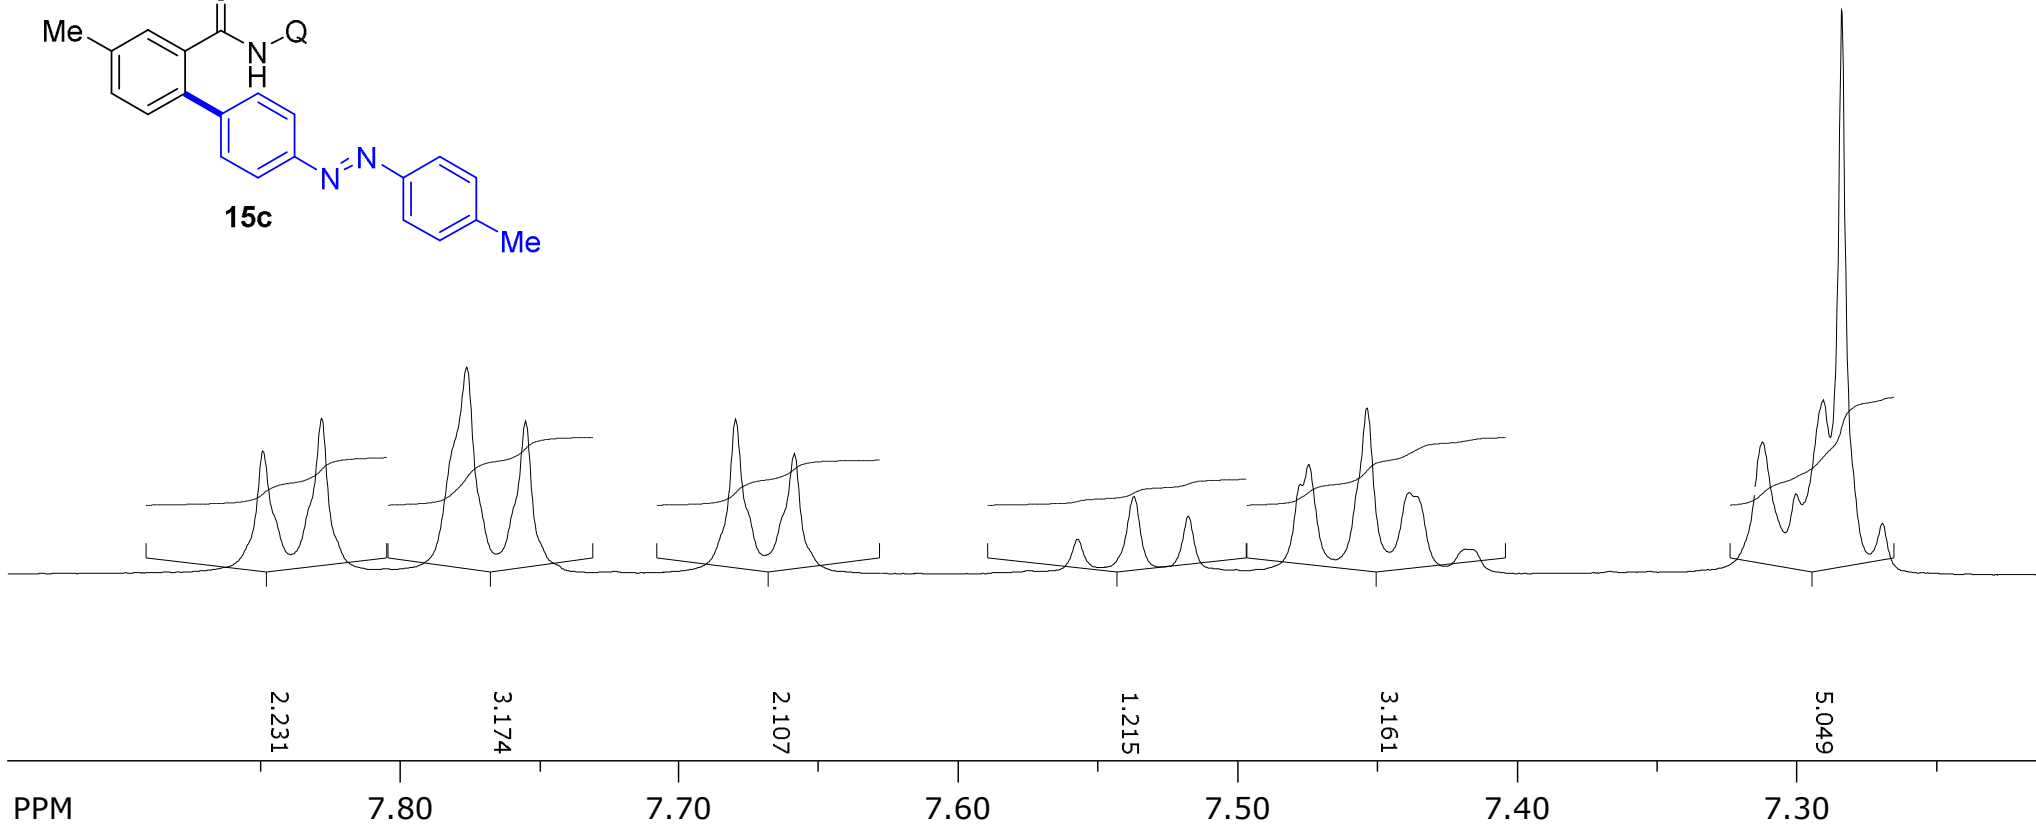



SpinWorks 4: SS-117

C13CPD256 CDCl3 /opt/topspin3.5pl2/nmrdata nmrsu 24

116.389  
121.407  
121.658  
122.787  
122.921  
127.242  
127.752  
129.730  
130.910  
131.910  
134.479  
135.959  
136.001  
136.561  
138.133  
138.410  
141.534  
142.524  
147.901  
150.770  
151.886  
167.817

76.739  
77.057  
77.260  
77.375

21.135  
21.536

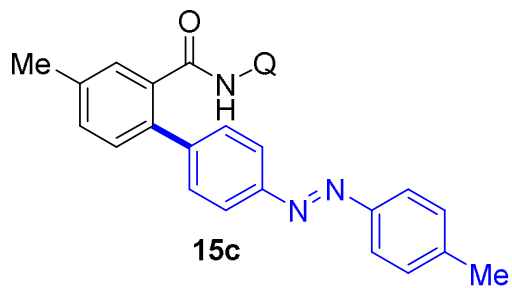

PPM

160

120

80

40

0

SpinWorks 4: SS-117

C13CPD256 CDCl3 /opt/topspin3.5pl2/nmrdata nmrsu 24

167.817

150.770  
151.886

147.901

141.534  
142.524

138.410

136.001  
135.957  
138.133

134.479

131.416  
129.962  
129.730  
129.801

127.752  
127.242

122.921  
121.658  
122.787

116.389



15c

PPM

160

150

140

130

120

110

100

SpinWorks 4: SS 197 P  
PROTON CDCl3 /opt/topspin3.5pl2/nmrdata nmrsu 51

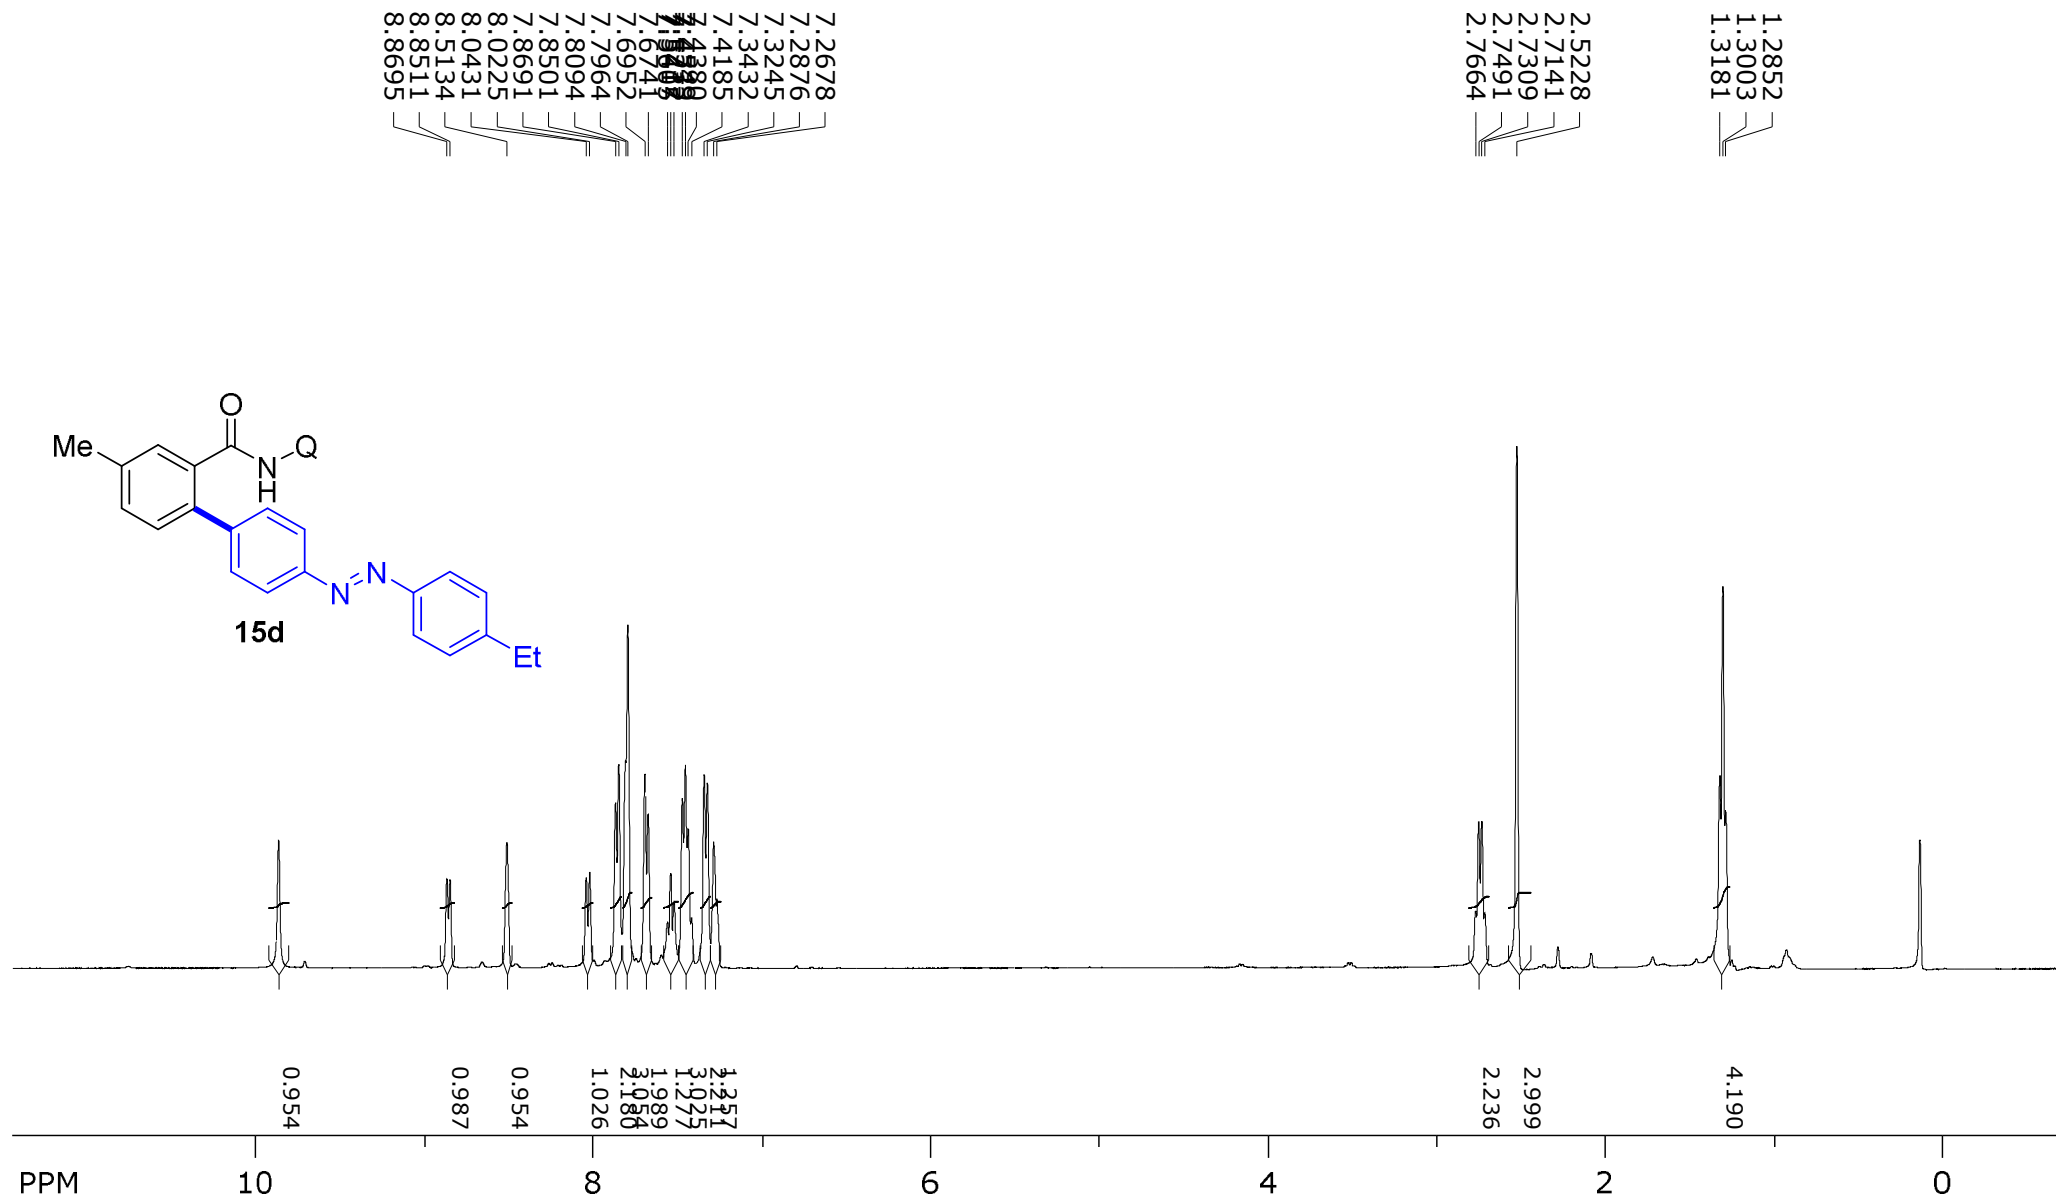

SpinWorks 4: SS 197 P  
PROTON CDCl3 /opt/topspin3.5pl2/nmrdata nmrsu 51

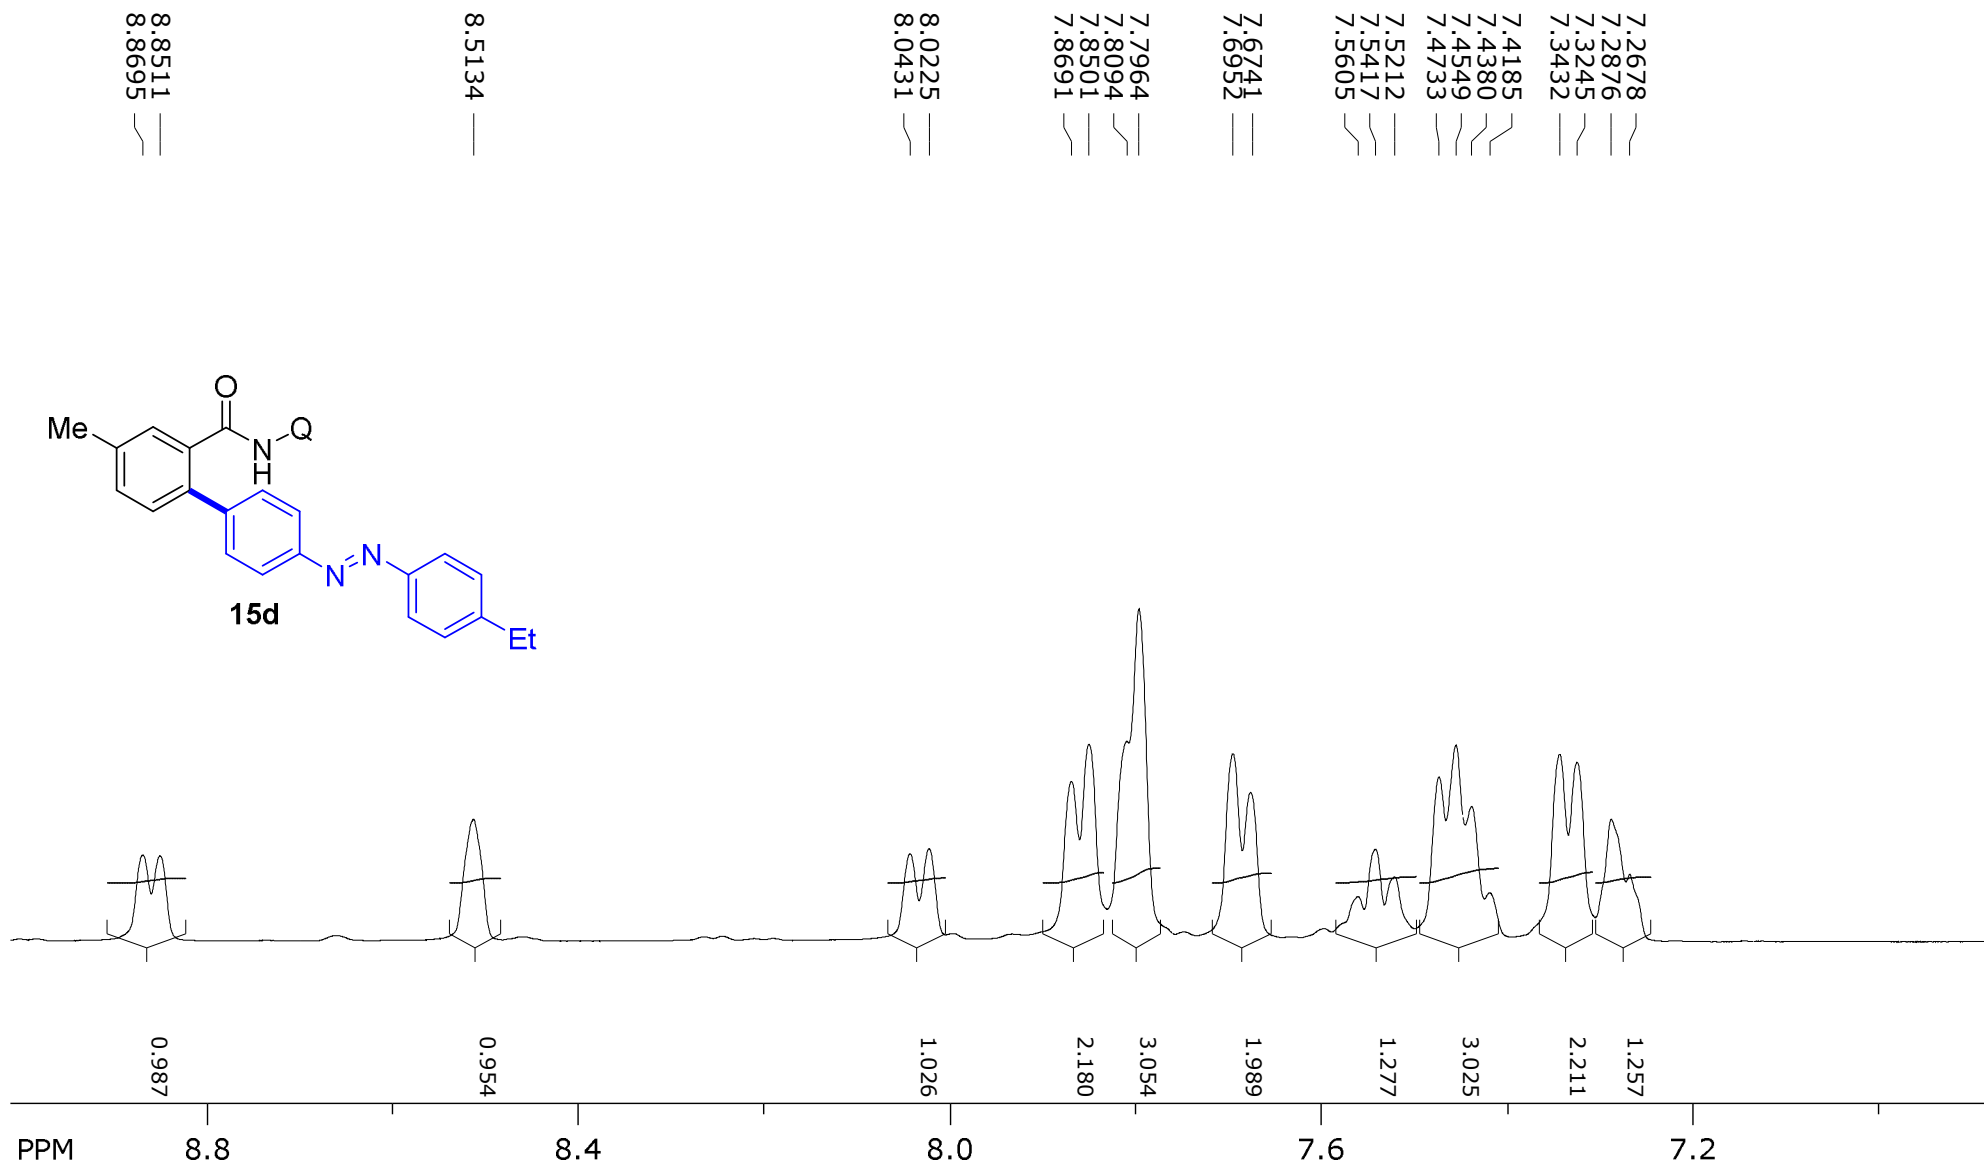

SpinWorks 4: SS 197 P

C13CPD256 CDCl3 /opt/topspin3.5pl2/nmrdata nmrsu 51

167.8097  
151.9312  
150.9631  
147.9044  
147.7901  
142.5281  
138.4185  
138.1314  
136.5809  
136.0009  
135.9565  
134.4947  
131.4293  
130.9749  
129.8133  
128.5448  
127.7548  
127.2428  
122.9340  
122.8846  
121.6672  
121.4163  
116.3959

76.7637  
77.0811  
77.3989

28.8538  
21.1530  
15.4403

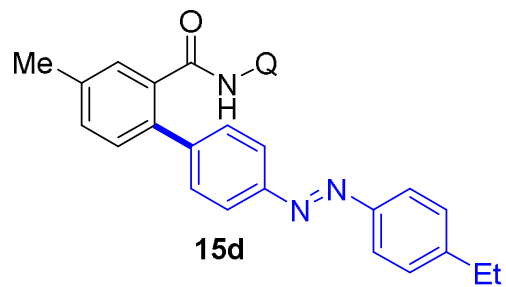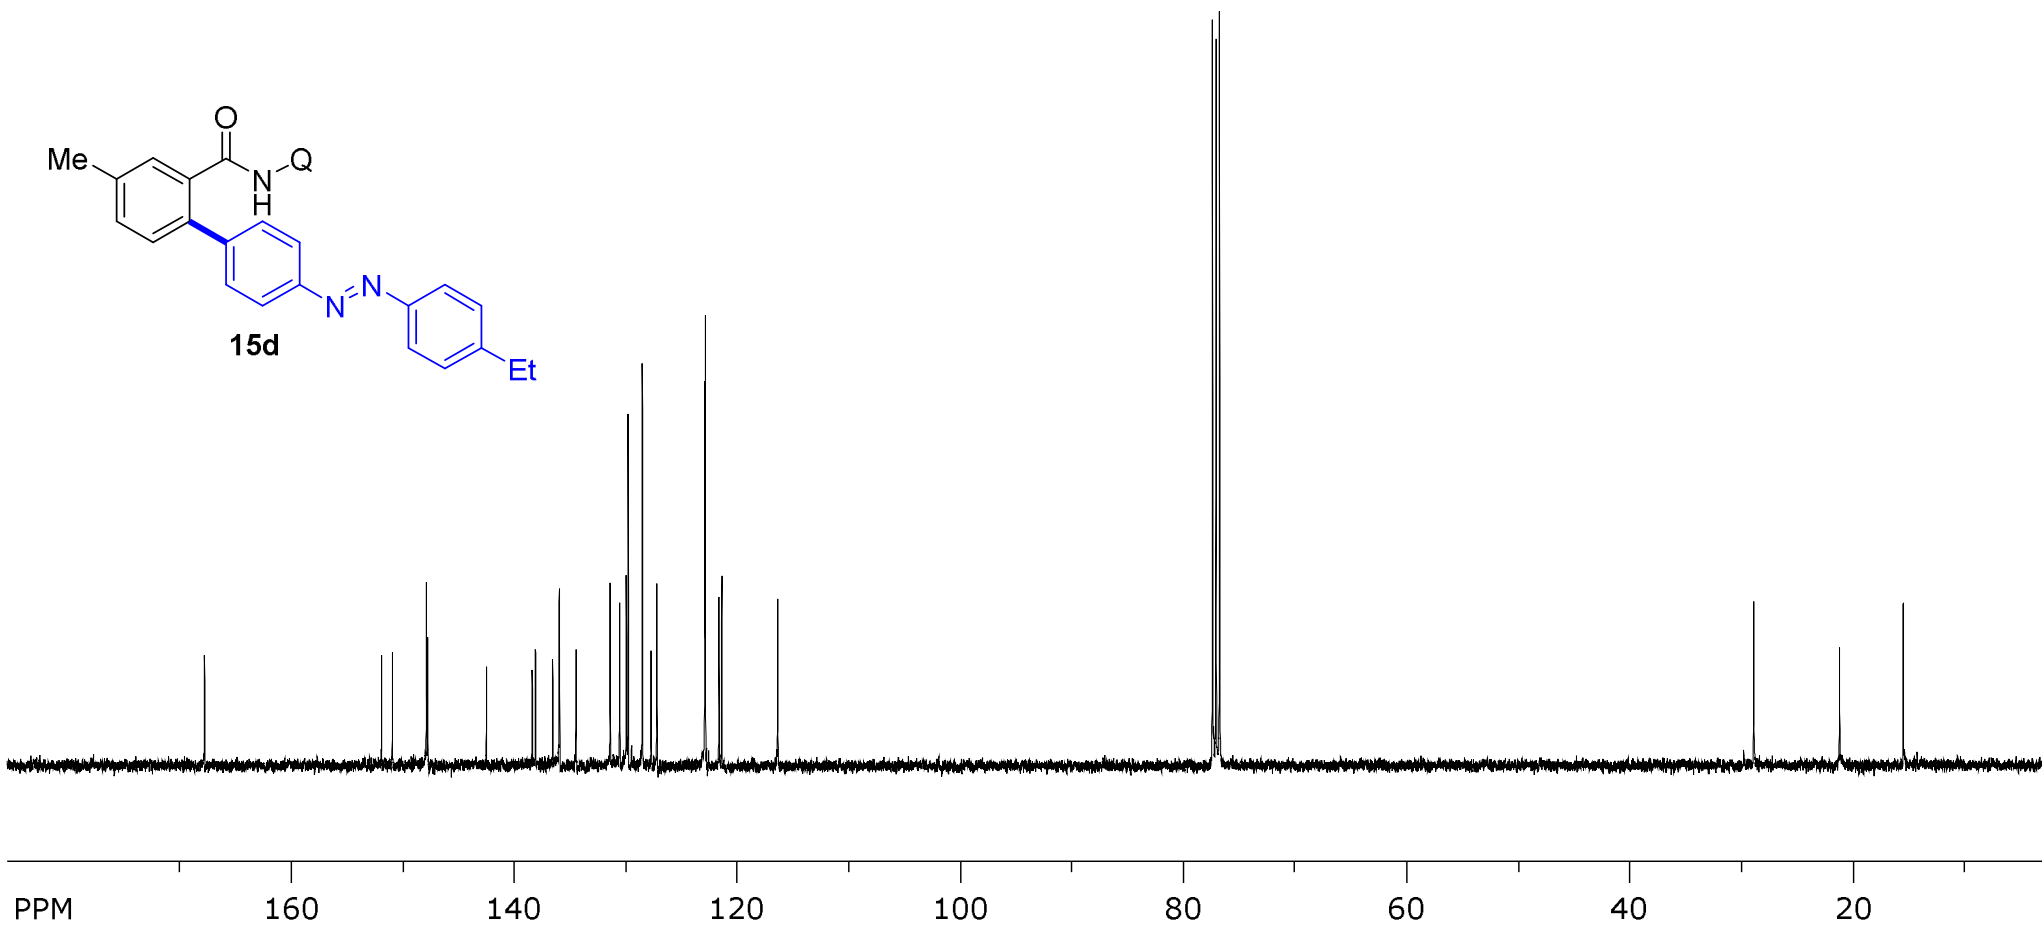

SpinWorks 4: SS 197 P  
C13CPD256 CDCl3 /opt/topspin3.5pl2/nmrdata/nmr su 51

147.7901  
147.9044  
150.9631  
151.9312  
142.5281  
138.4185  
138.1314  
136.5809  
136.0009  
135.9565  
134.4947  
131.4293  
130.5745  
129.9776  
129.8133  
128.5448  
127.7548  
127.2428  
122.9340  
122.8846  
121.6672  
121.4163  
116.3959

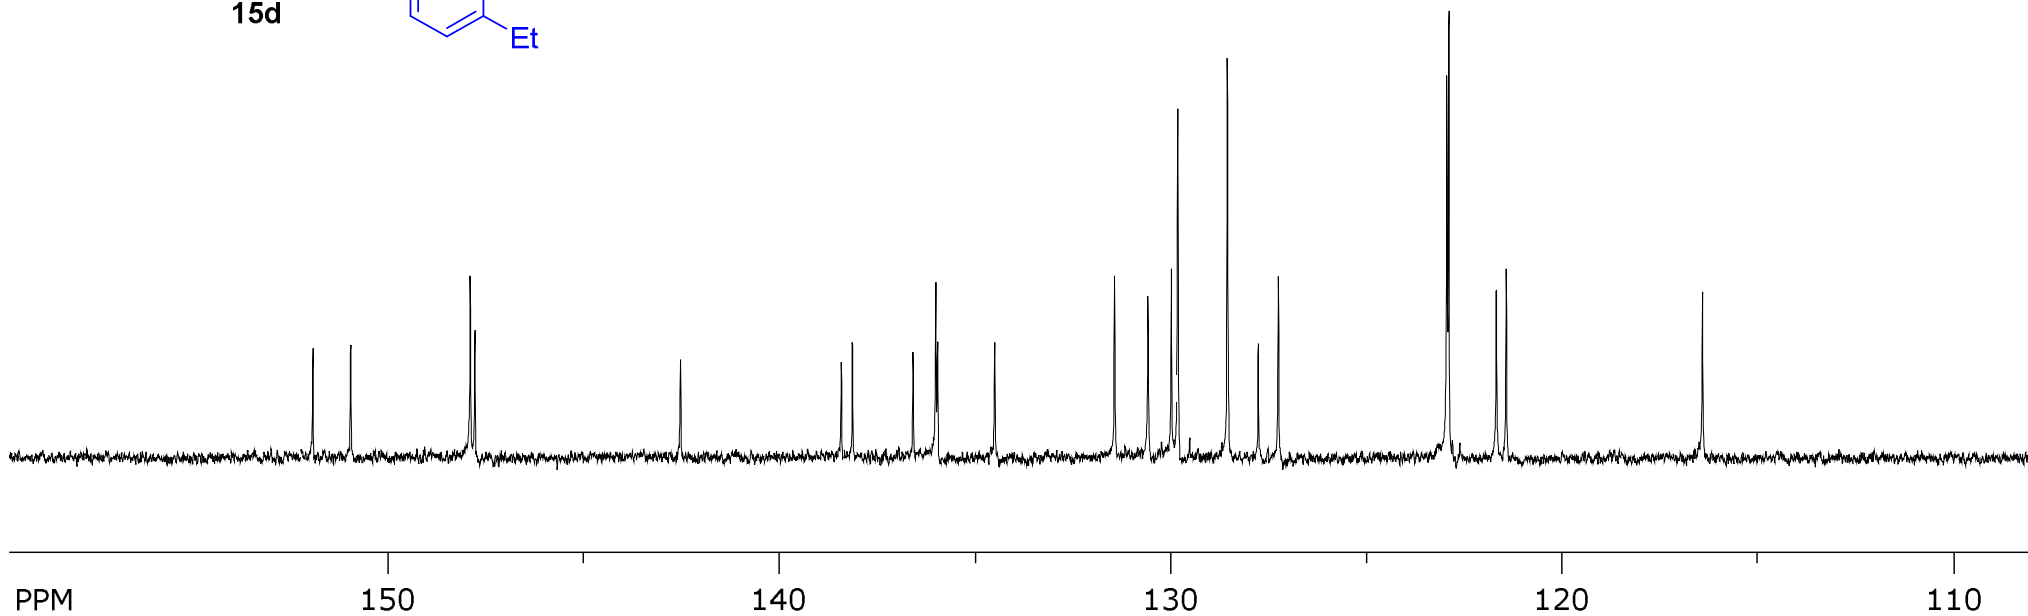

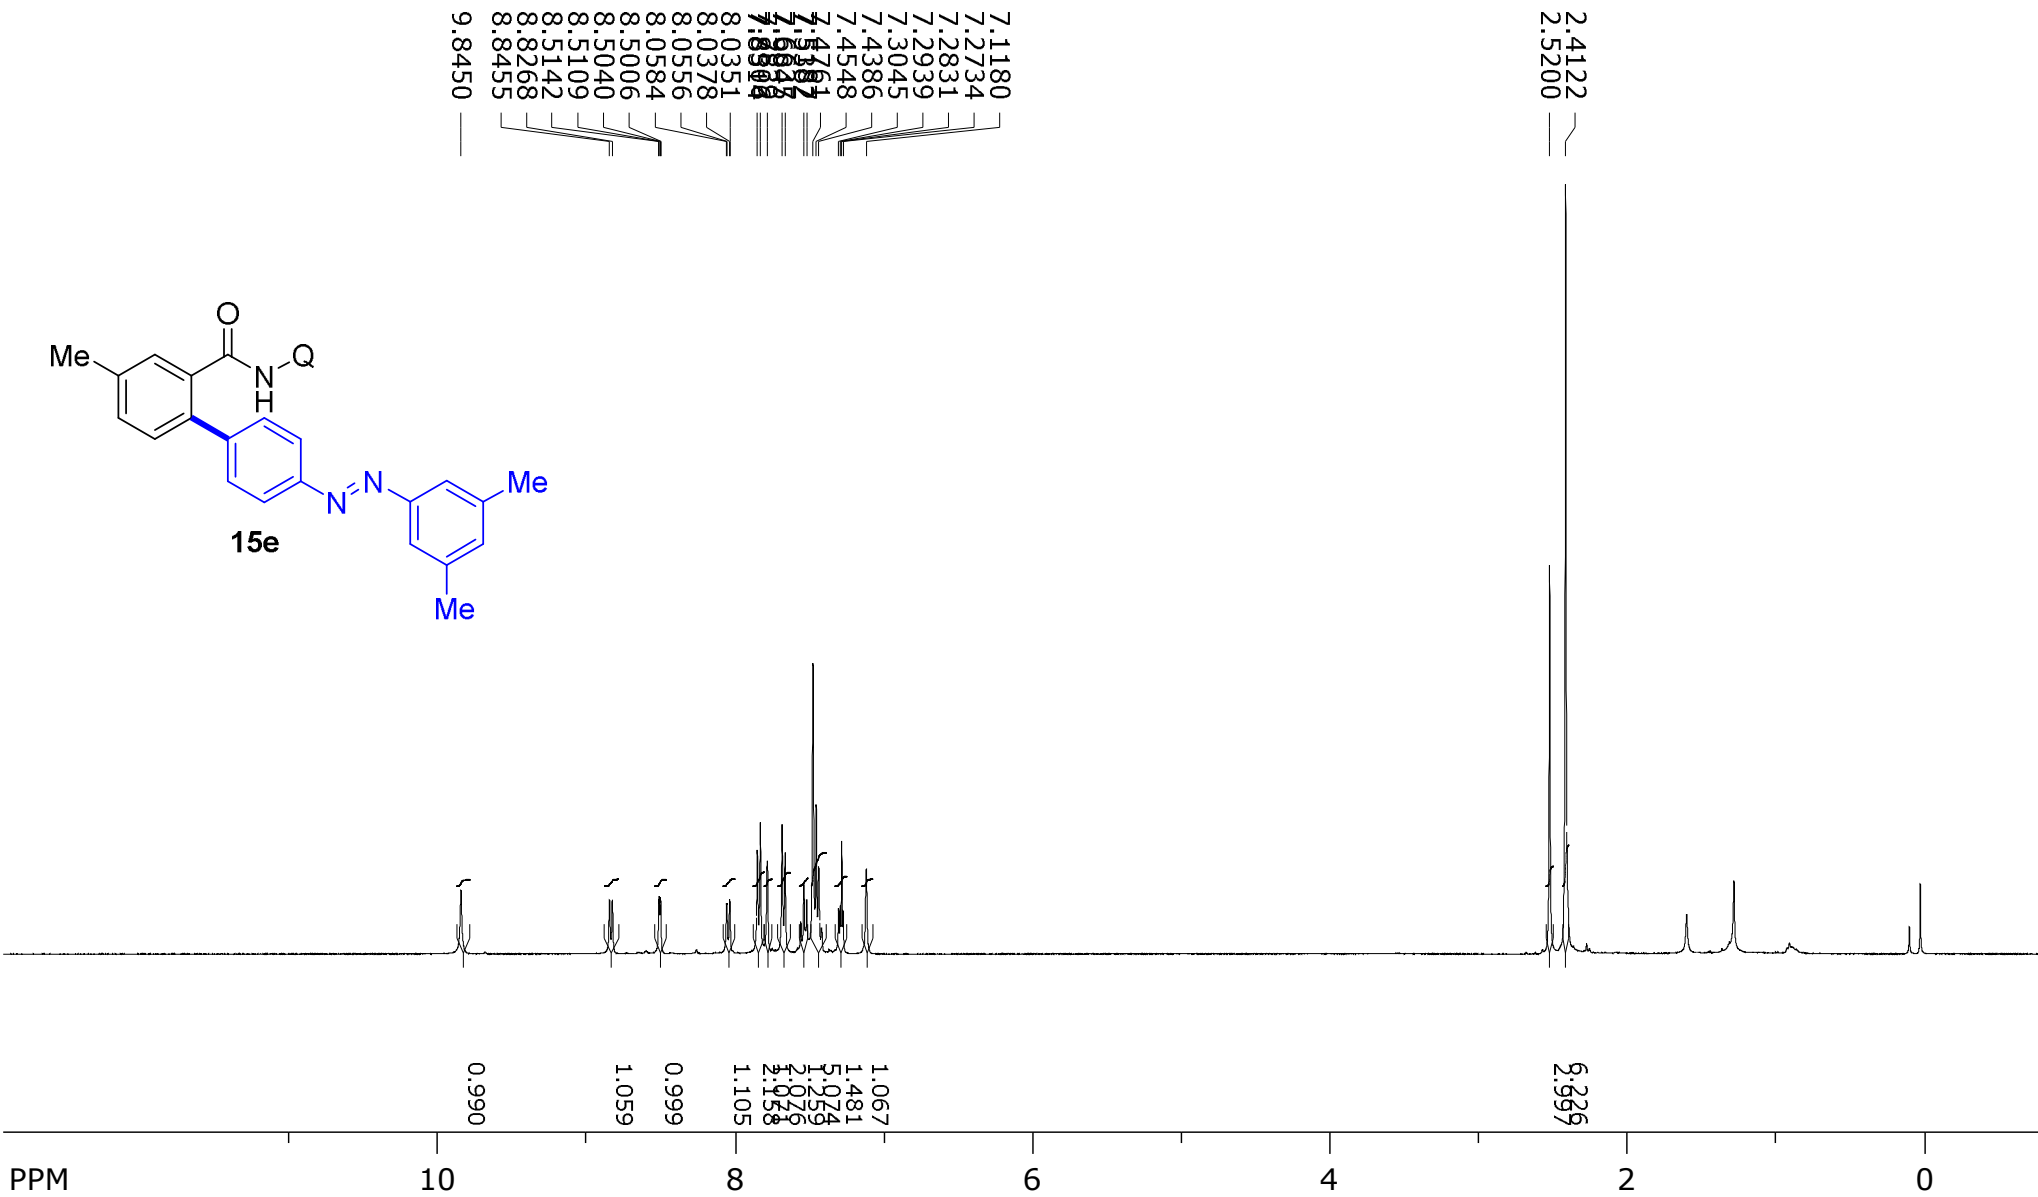

9.8450

8.8268  
8.8455

8.5006  
8.5040  
8.5109  
8.5142

8.0351  
8.0378  
8.0556  
8.0584

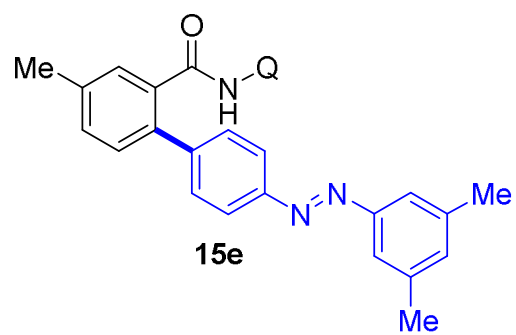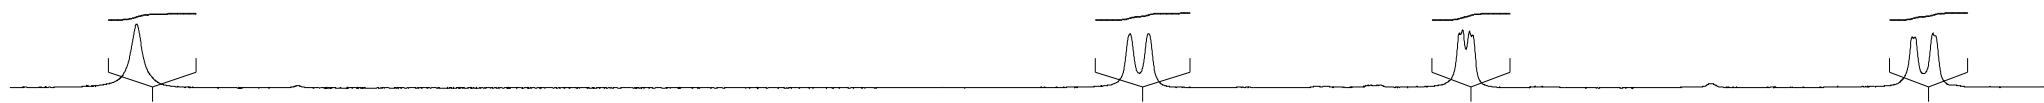

0.990

1.059

0.999

1.105

PPM 9.6 9.2 8.8 8.4 8.0



SpinWorks 4: ss 134 II -P

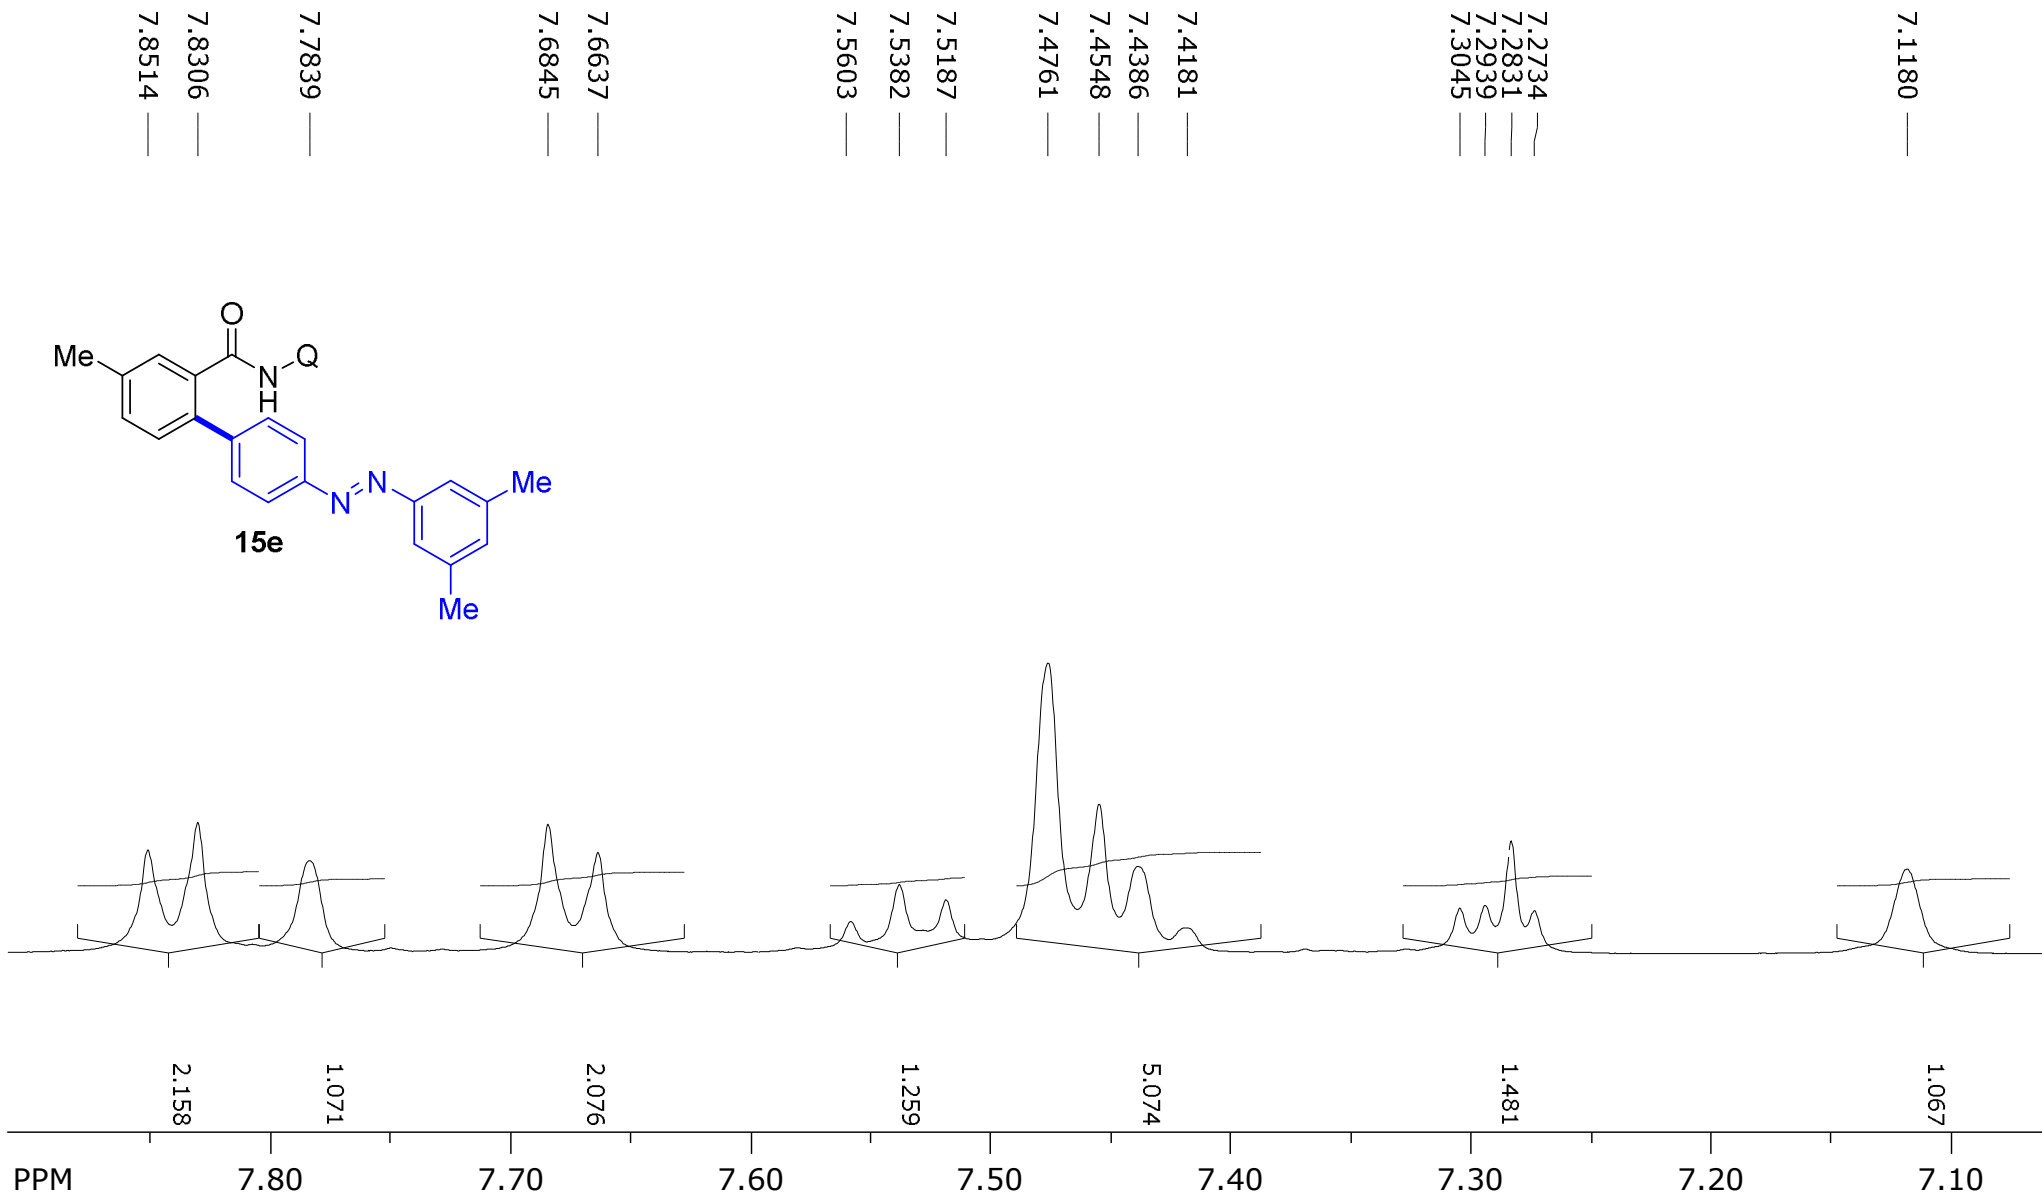

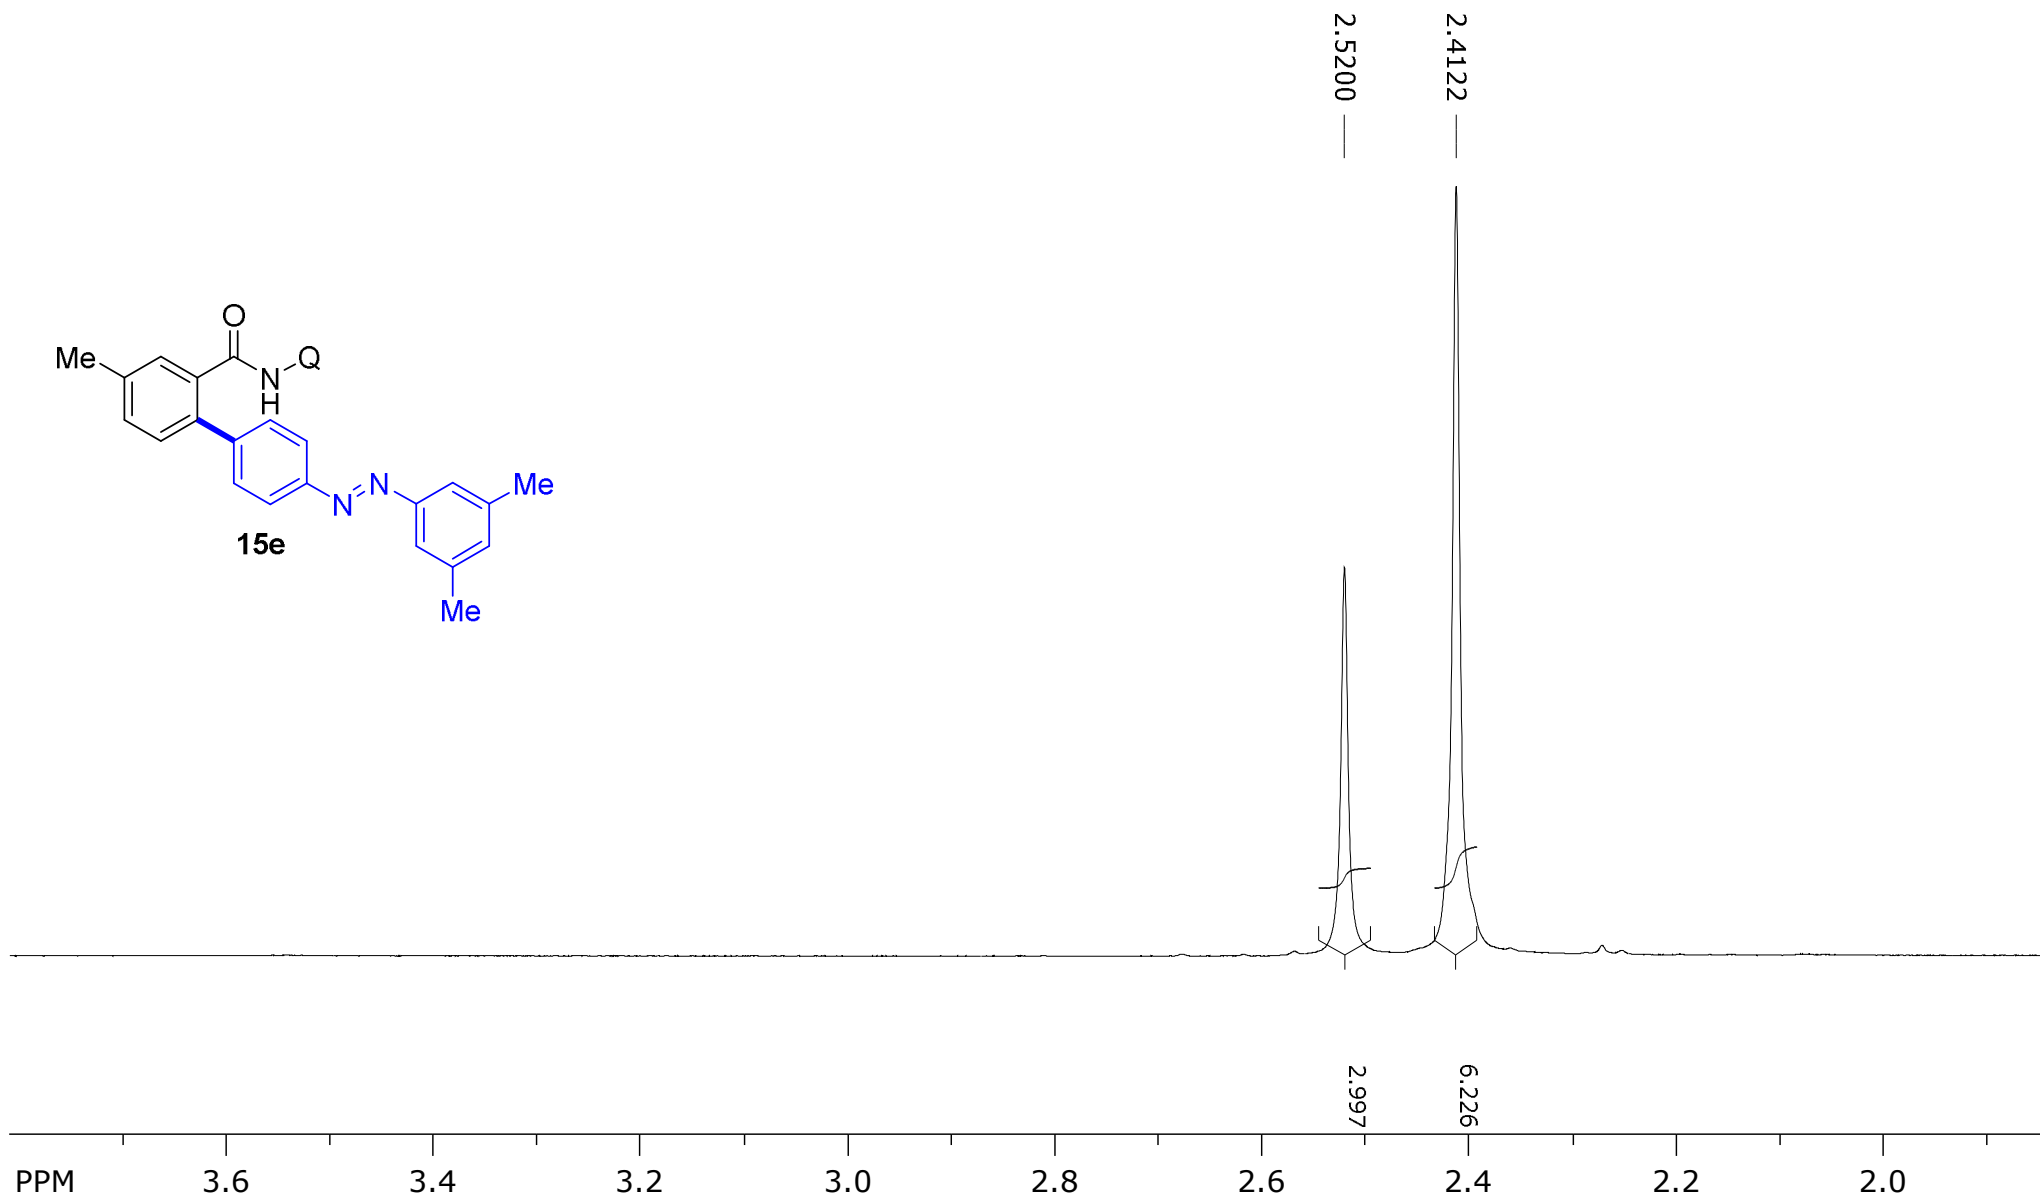

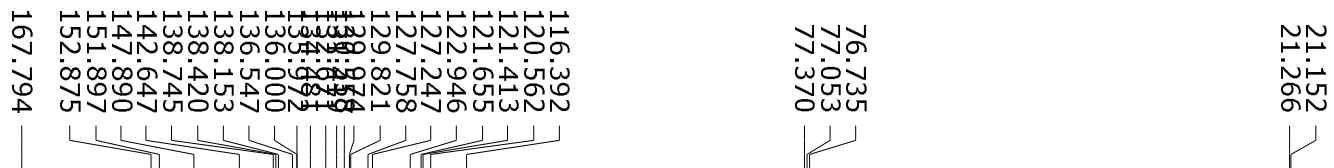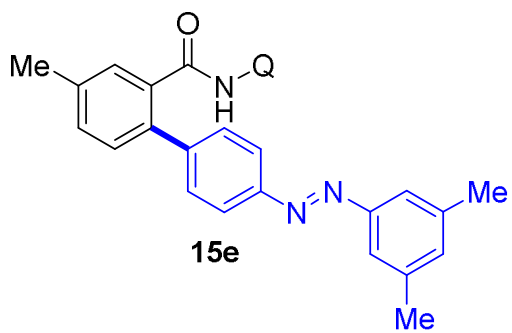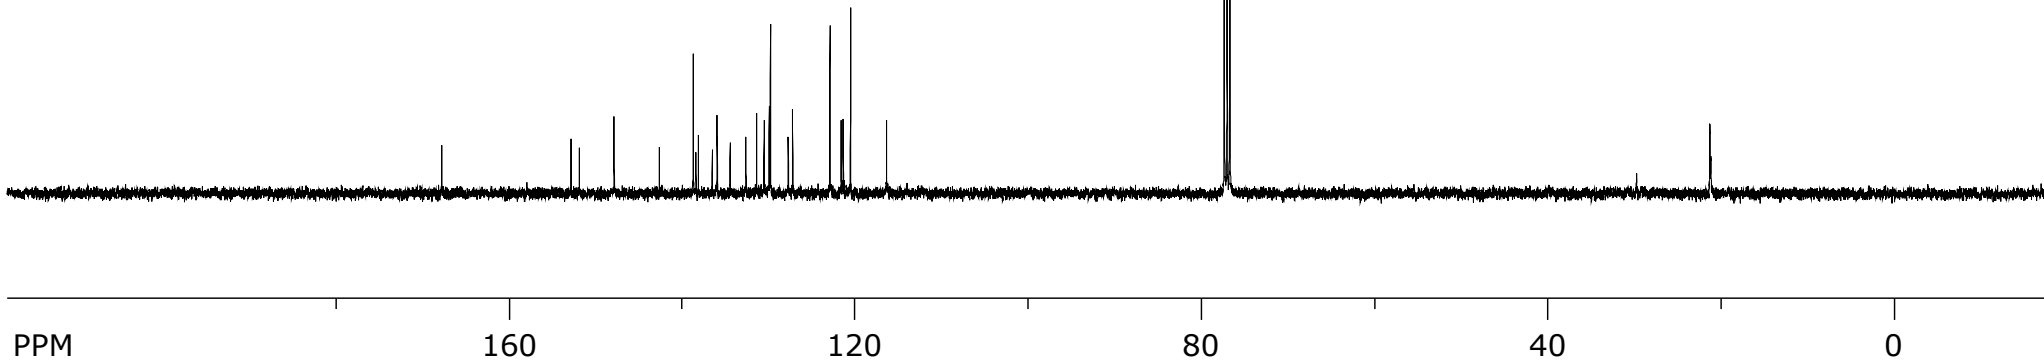

PPM

160

120

80

40

0

SpinWorks 4: ss-134-ii-p

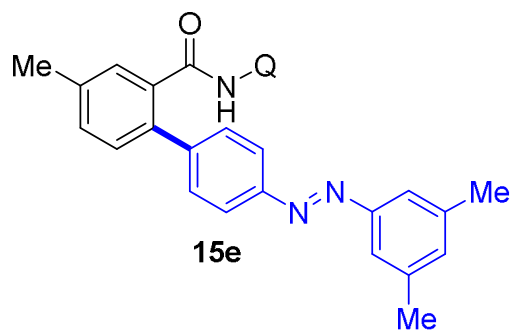

167.794

151.897  
152.875

147.890

142.647

138.745  
138.420  
138.153  
136.547  
136.000  
135.972

134.481

132.671

131.419

130.558

129.974

129.821

127.758

127.247

122.946

121.655

121.413

120.562

116.392

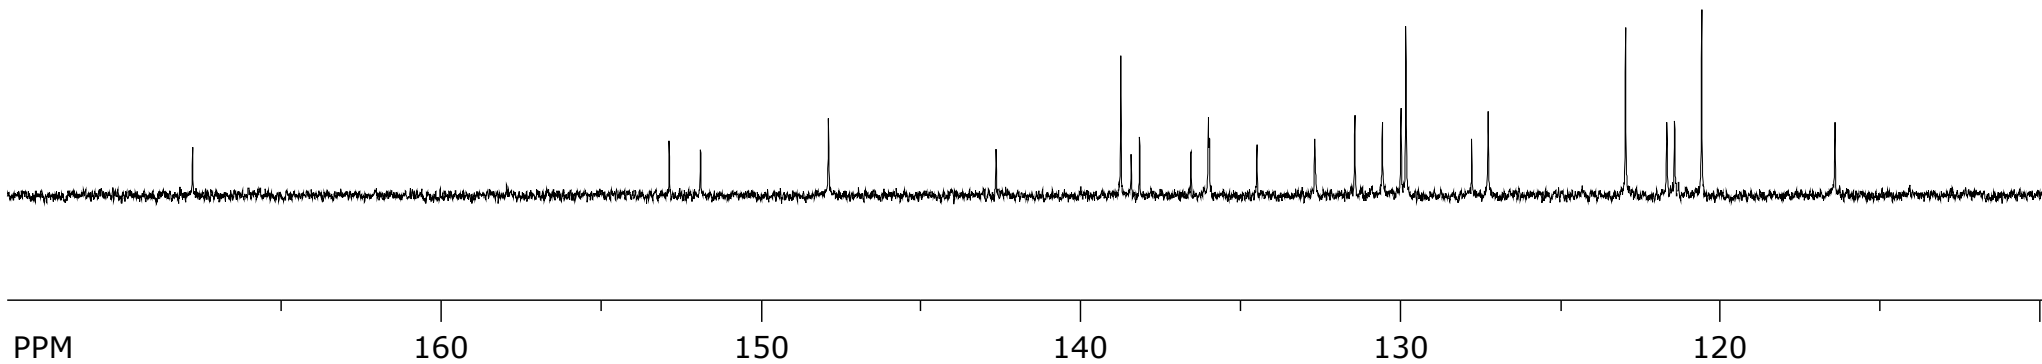

9.8846  
8.8663  
8.8476  
8.5324  
8.5287  
8.5183  
8.0549  
8.0343  
8.0308  
7.8603  
7.8094  
7.6994  
7.6484  
7.5974  
7.3024  
7.2919  
7.2848  
7.2712  
7.2231  
7.2178  
7.2016  
2.6472  
2.5228

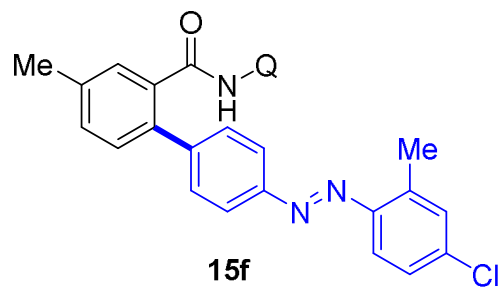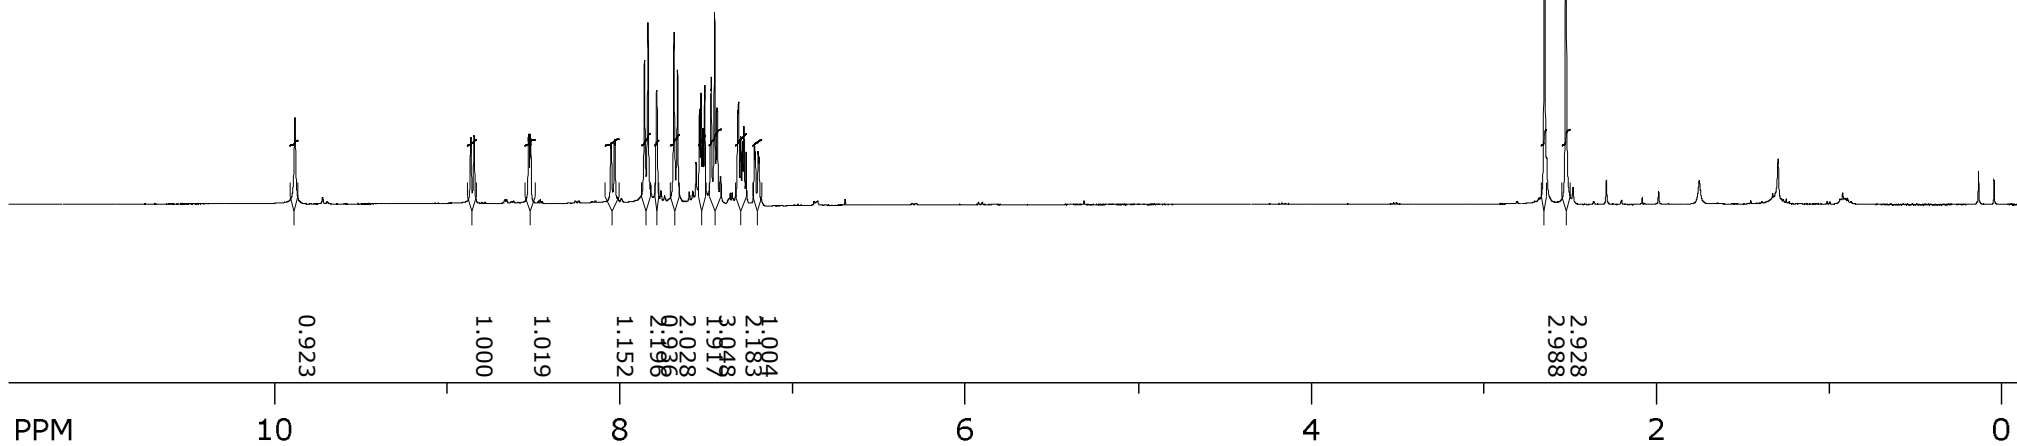

9.8846

8.8476  
8.8663

8.5183  
8.5220  
8.5287  
8.5324

8.0308  
8.0343  
8.0515  
8.0549

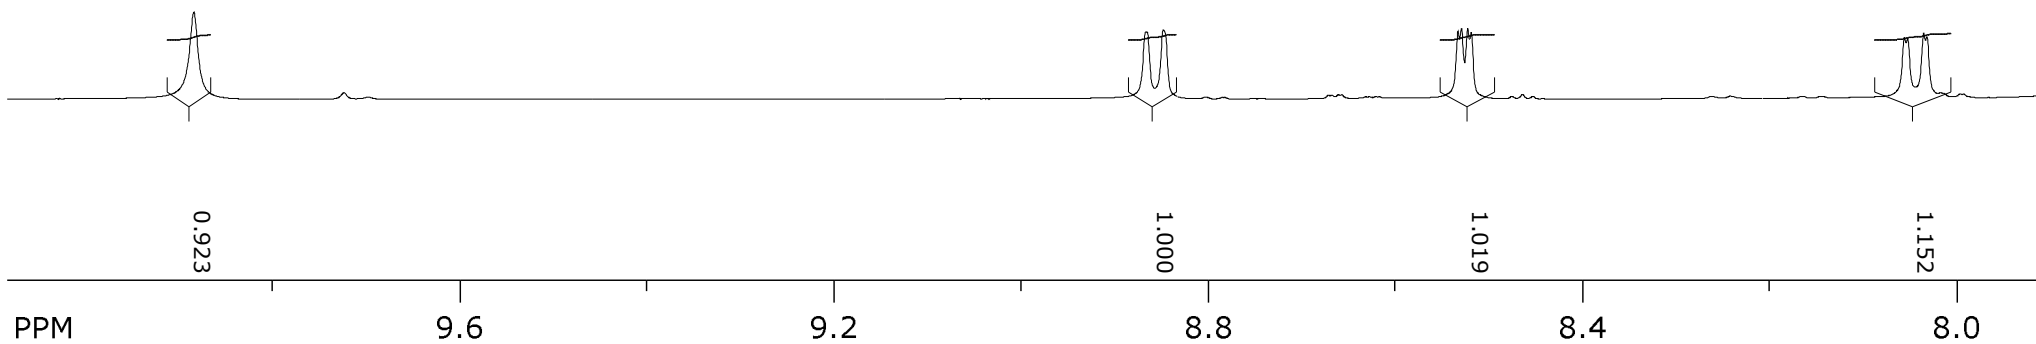

7.8394  
7.8603

7.7892

7.6684  
7.6893

7.5109  
7.5214  
7.5325  
7.5408

7.4736  
7.4407  
7.4534

7.3195  
7.3148  
7.3024  
7.2919  
7.2848  
7.2712

7.2016  
7.2178  
7.2231

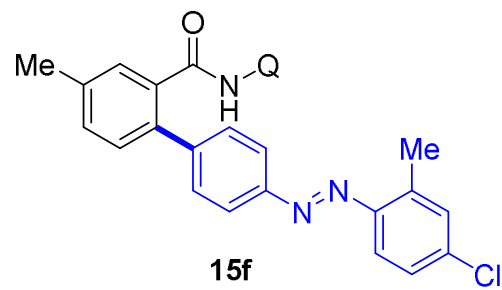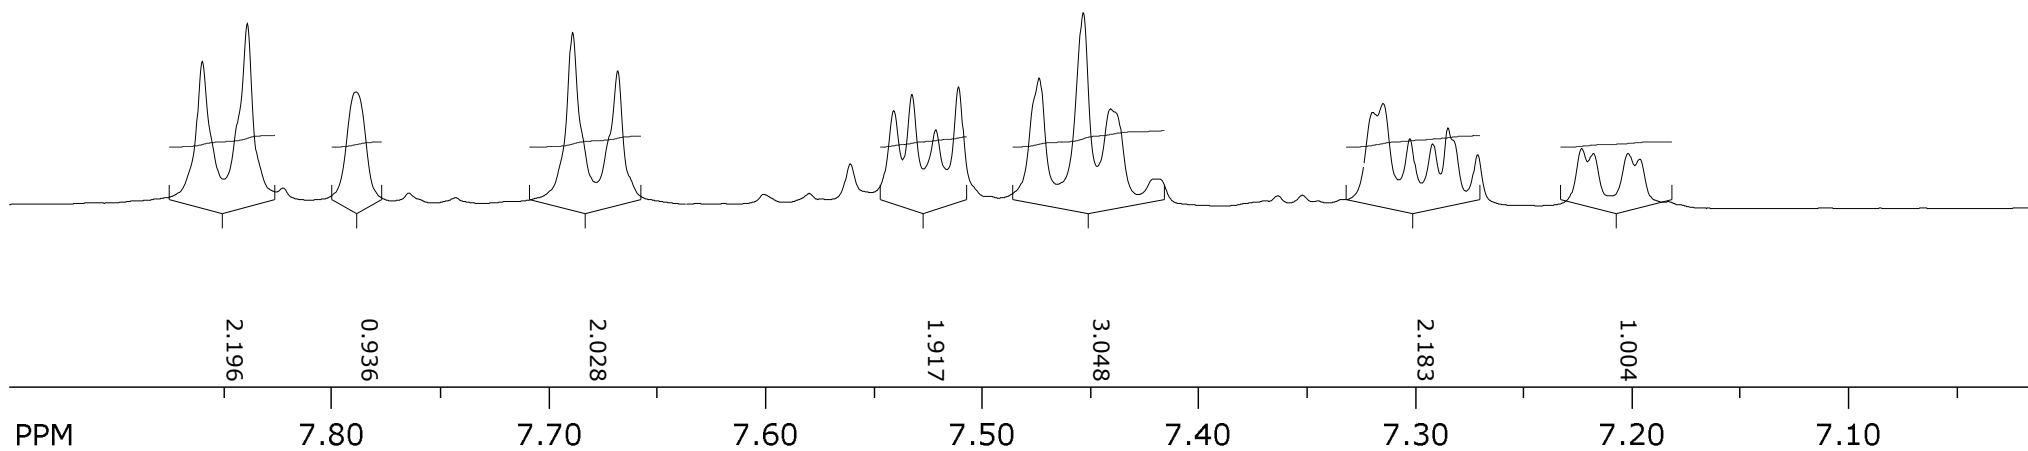

SpinWorks 4: SS 206 P  
C13CPD256 CDCl3 /opt/topspin3.5pl2/nmrdata nmrsu 58

167.805  
152.018  
149.036  
147.877  
142.955  
139.851  
138.419  
138.244  
136.628  
136.532  
135.092  
134.484  
134.484  
129.904  
129.904  
129.838  
127.760  
127.282  
126.675  
123.194  
121.706  
121.410  
116.733  
116.436

76.780  
77.098  
77.415

17.370  
21.176



15f

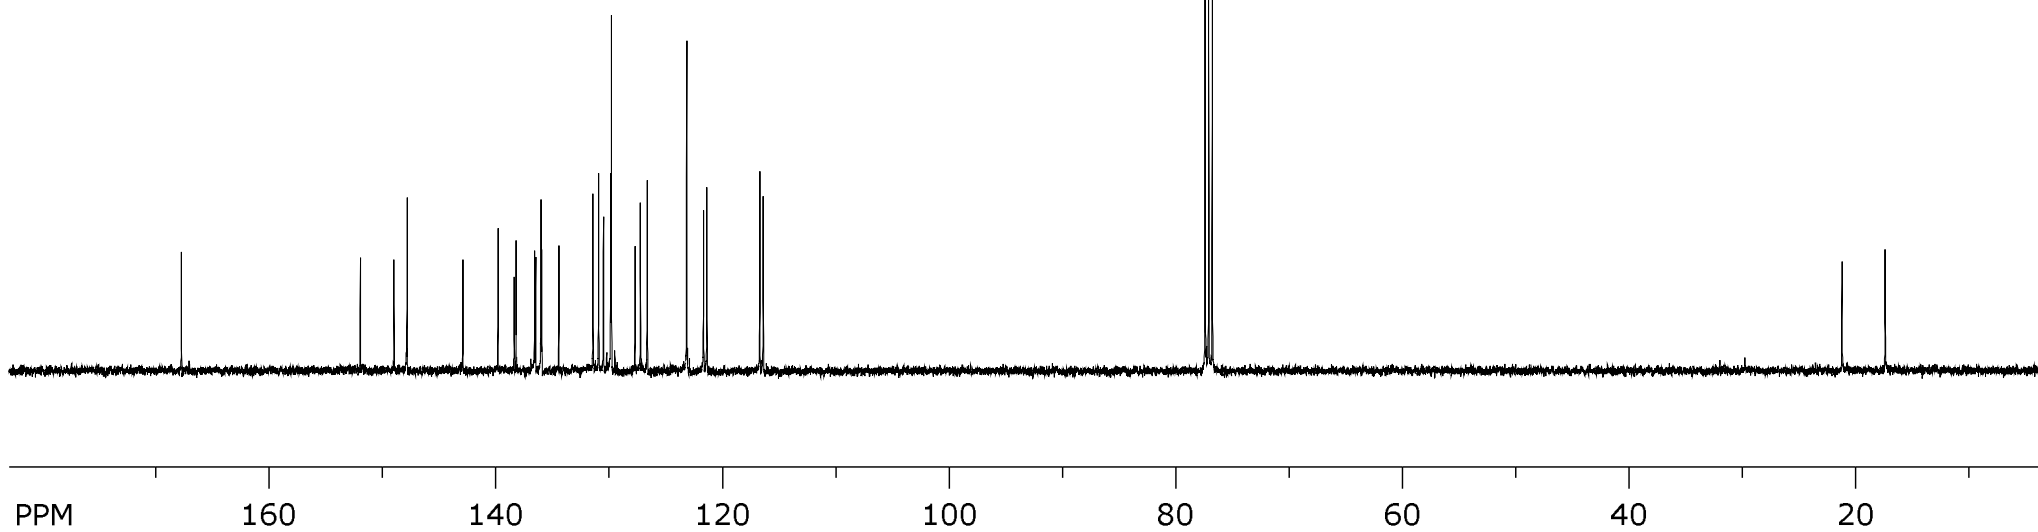



SpinWorks 4: SS 206 P  
C13CPD256 CDCl3 /opt/topspin3.5pl2/nmrdata nmrsu 58

167.805 —  
152.018 —  
149.036 —  
147.877 —  
142.955 —  
139.851 —  
138.419 —  
136.628 —  
136.532 —  
135.985 —  
134.484 —  
131.466 —  
130.969 —  
130.539 —  
129.904 —  
129.838 —  
127.760 —  
126.675 —  
123.194 —  
121.410 —  
121.706 —  
116.733 —  
116.436 —

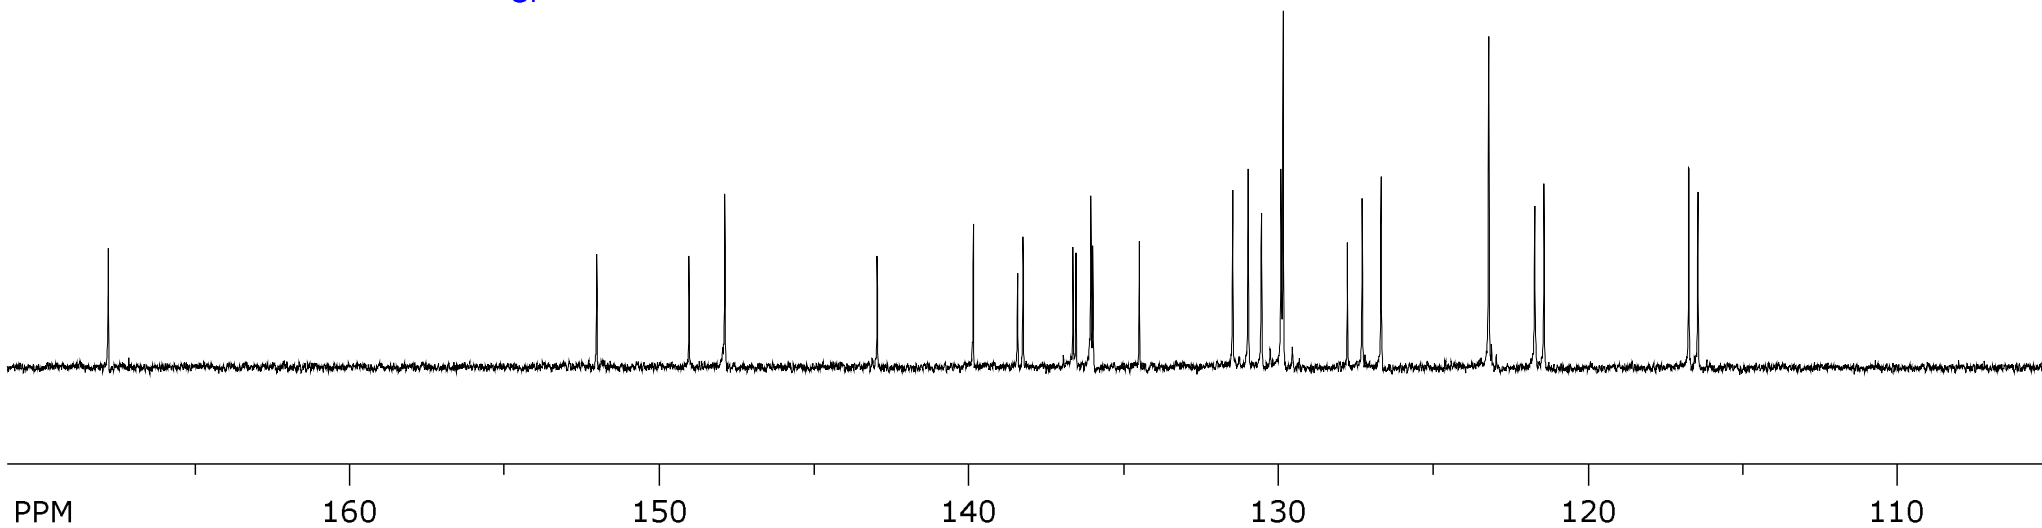

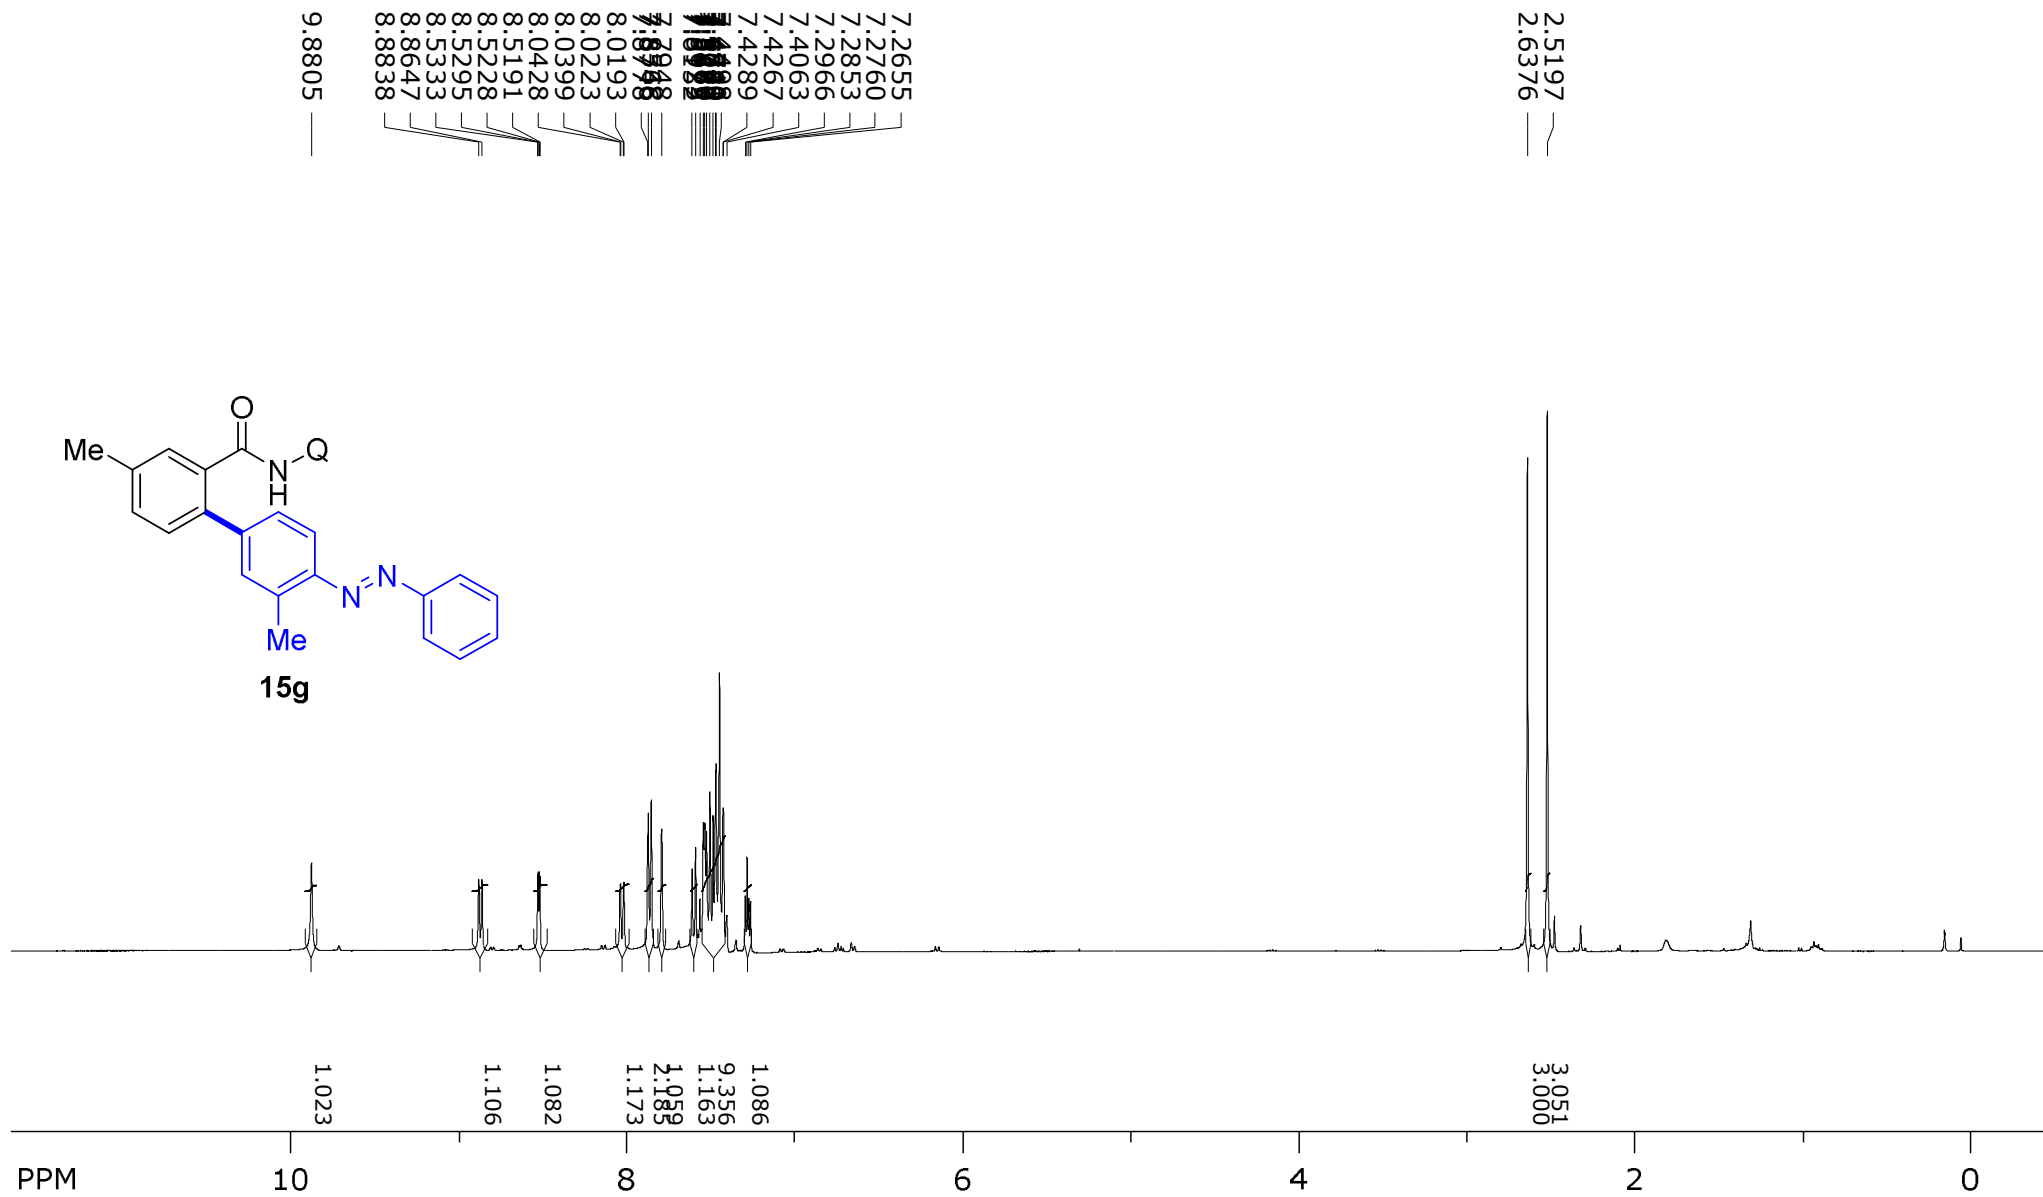

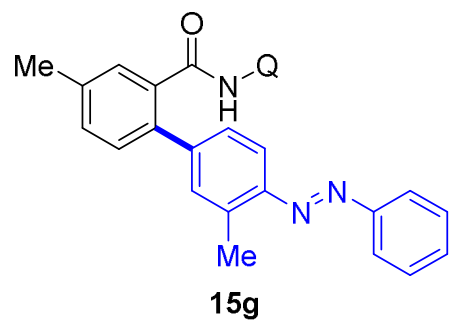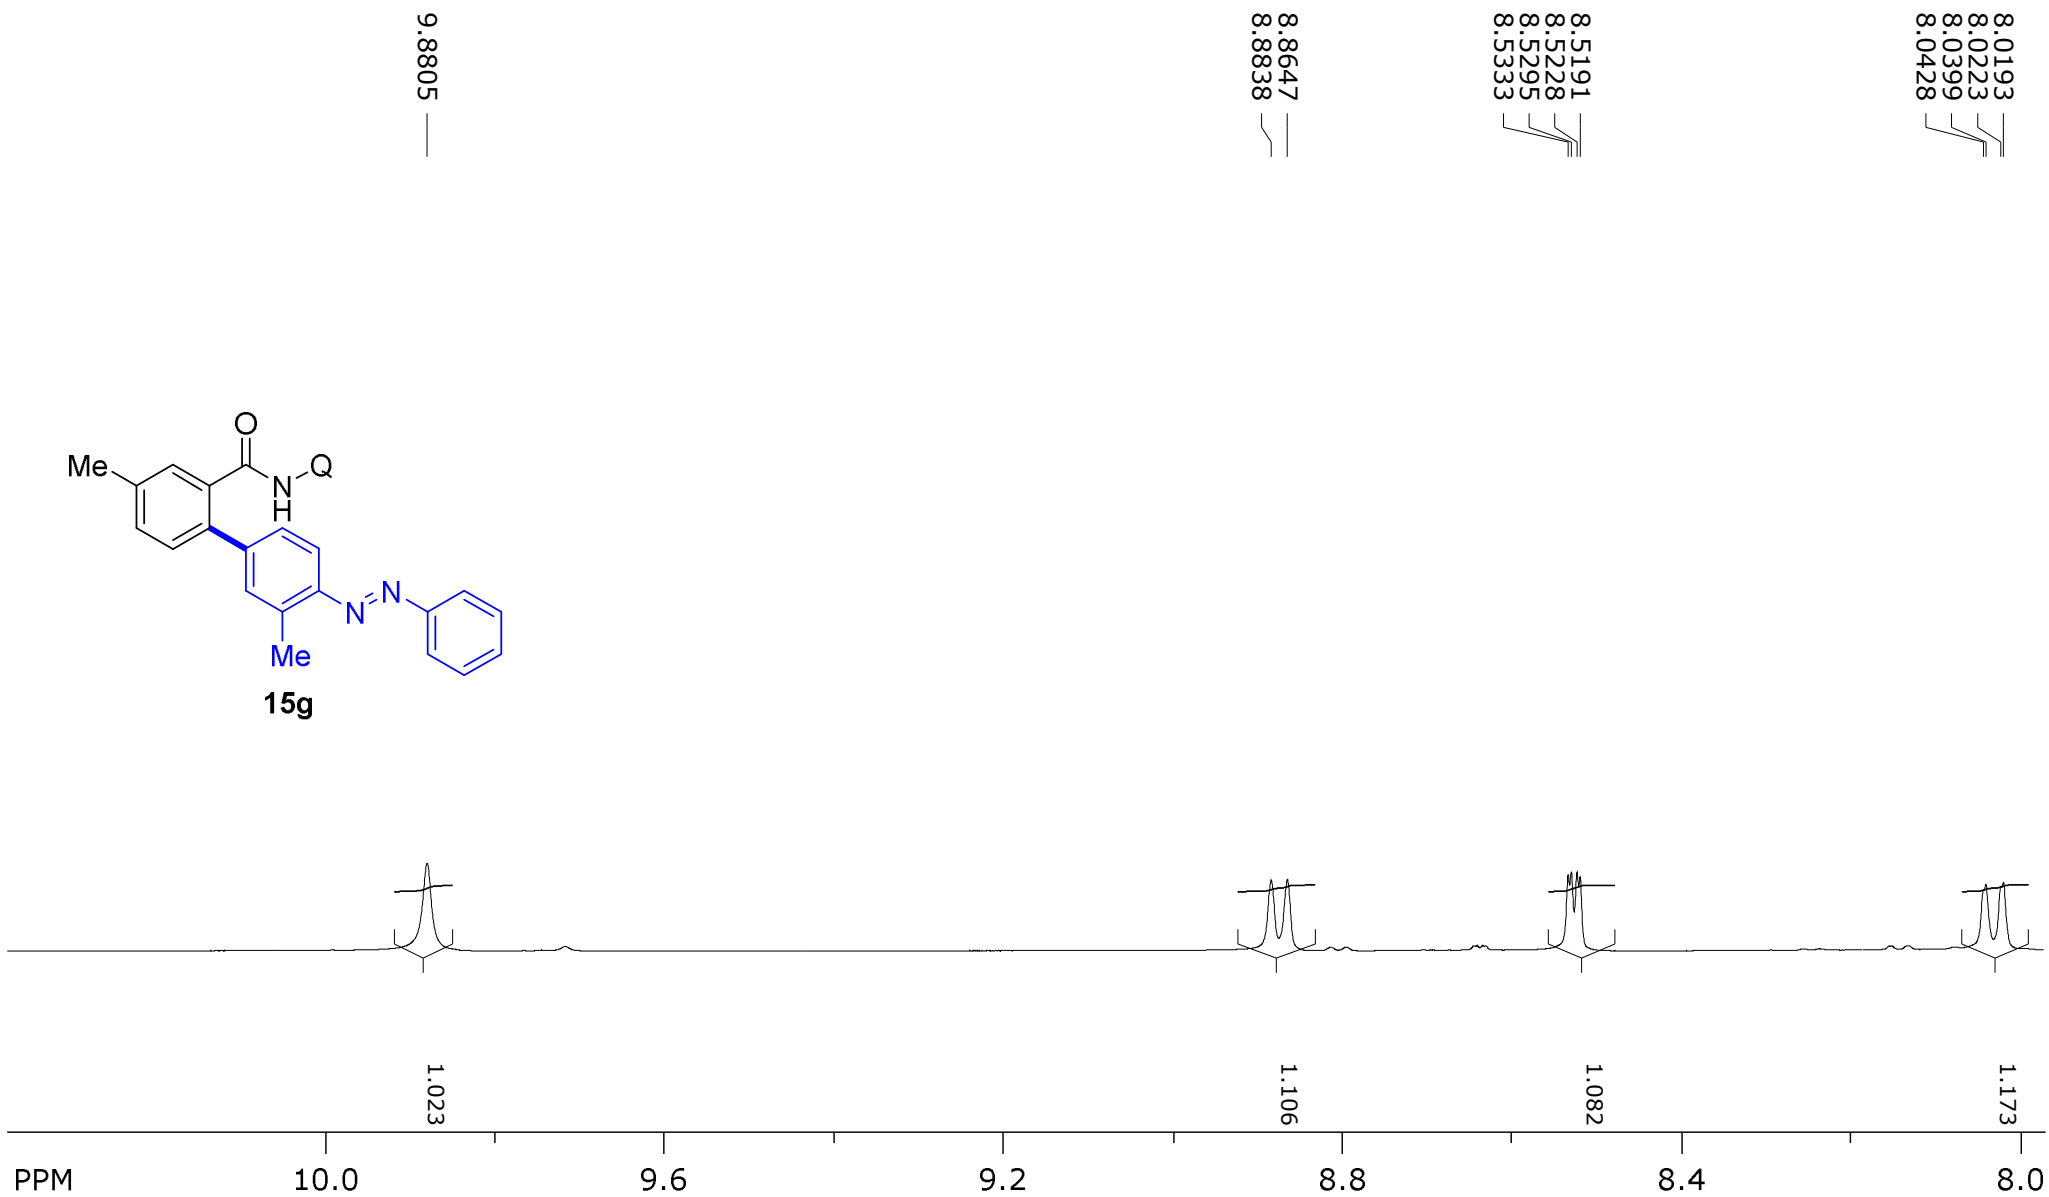

7.8568  
7.8746  
7.8778

7.7948

7.6132  
7.5925

7.5672  
7.5277  
7.5380  
7.5469

7.5072  
7.4880  
7.4710  
7.4741

7.4498  
7.4267  
7.4289

7.2655  
7.2760  
7.2853  
7.2966

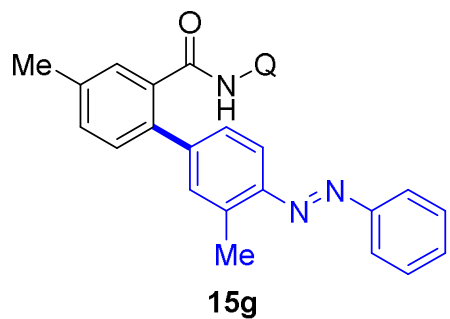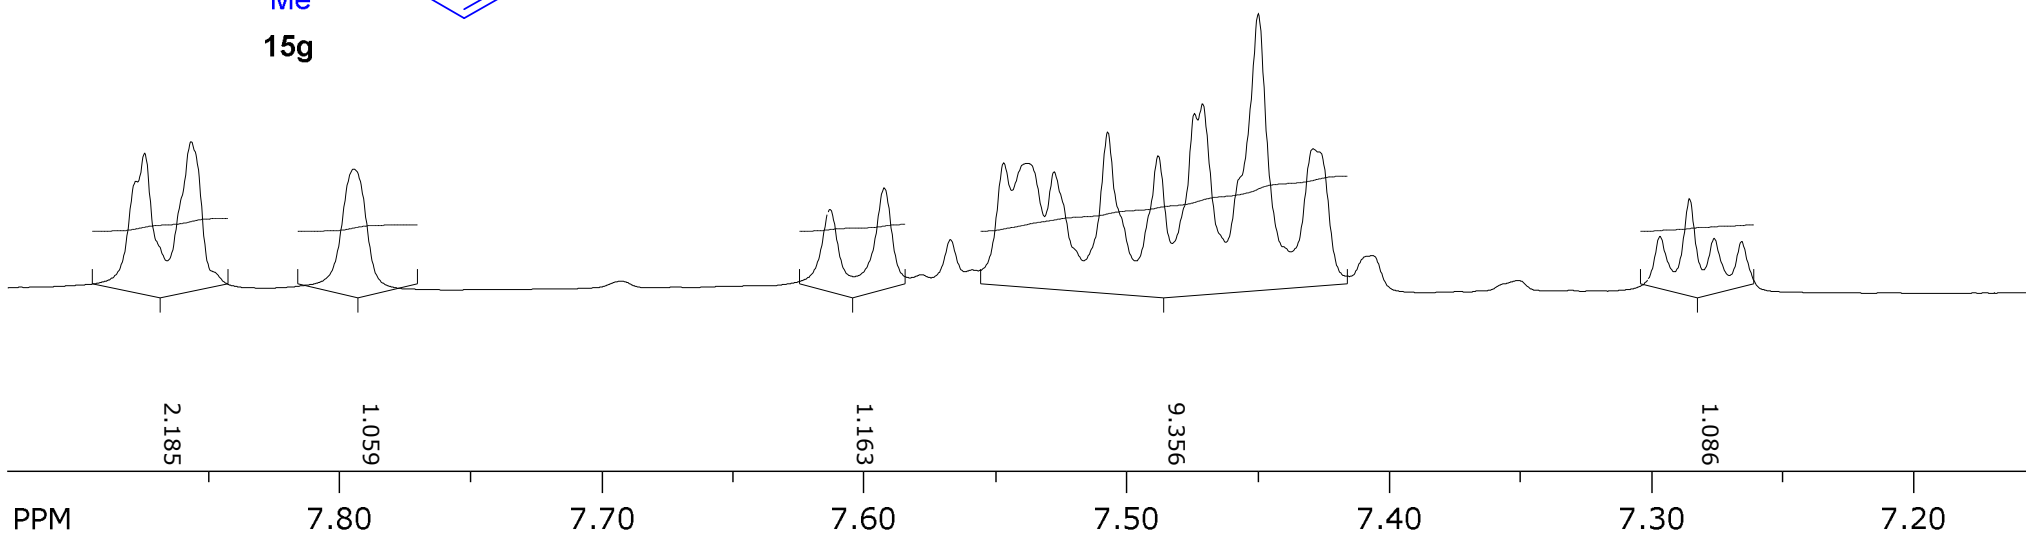

SpinWorks 4: SS 207 P  
C13CPD256 CDCl3 /opt/topspin3.5pl2/nmrdata nmrsu 59

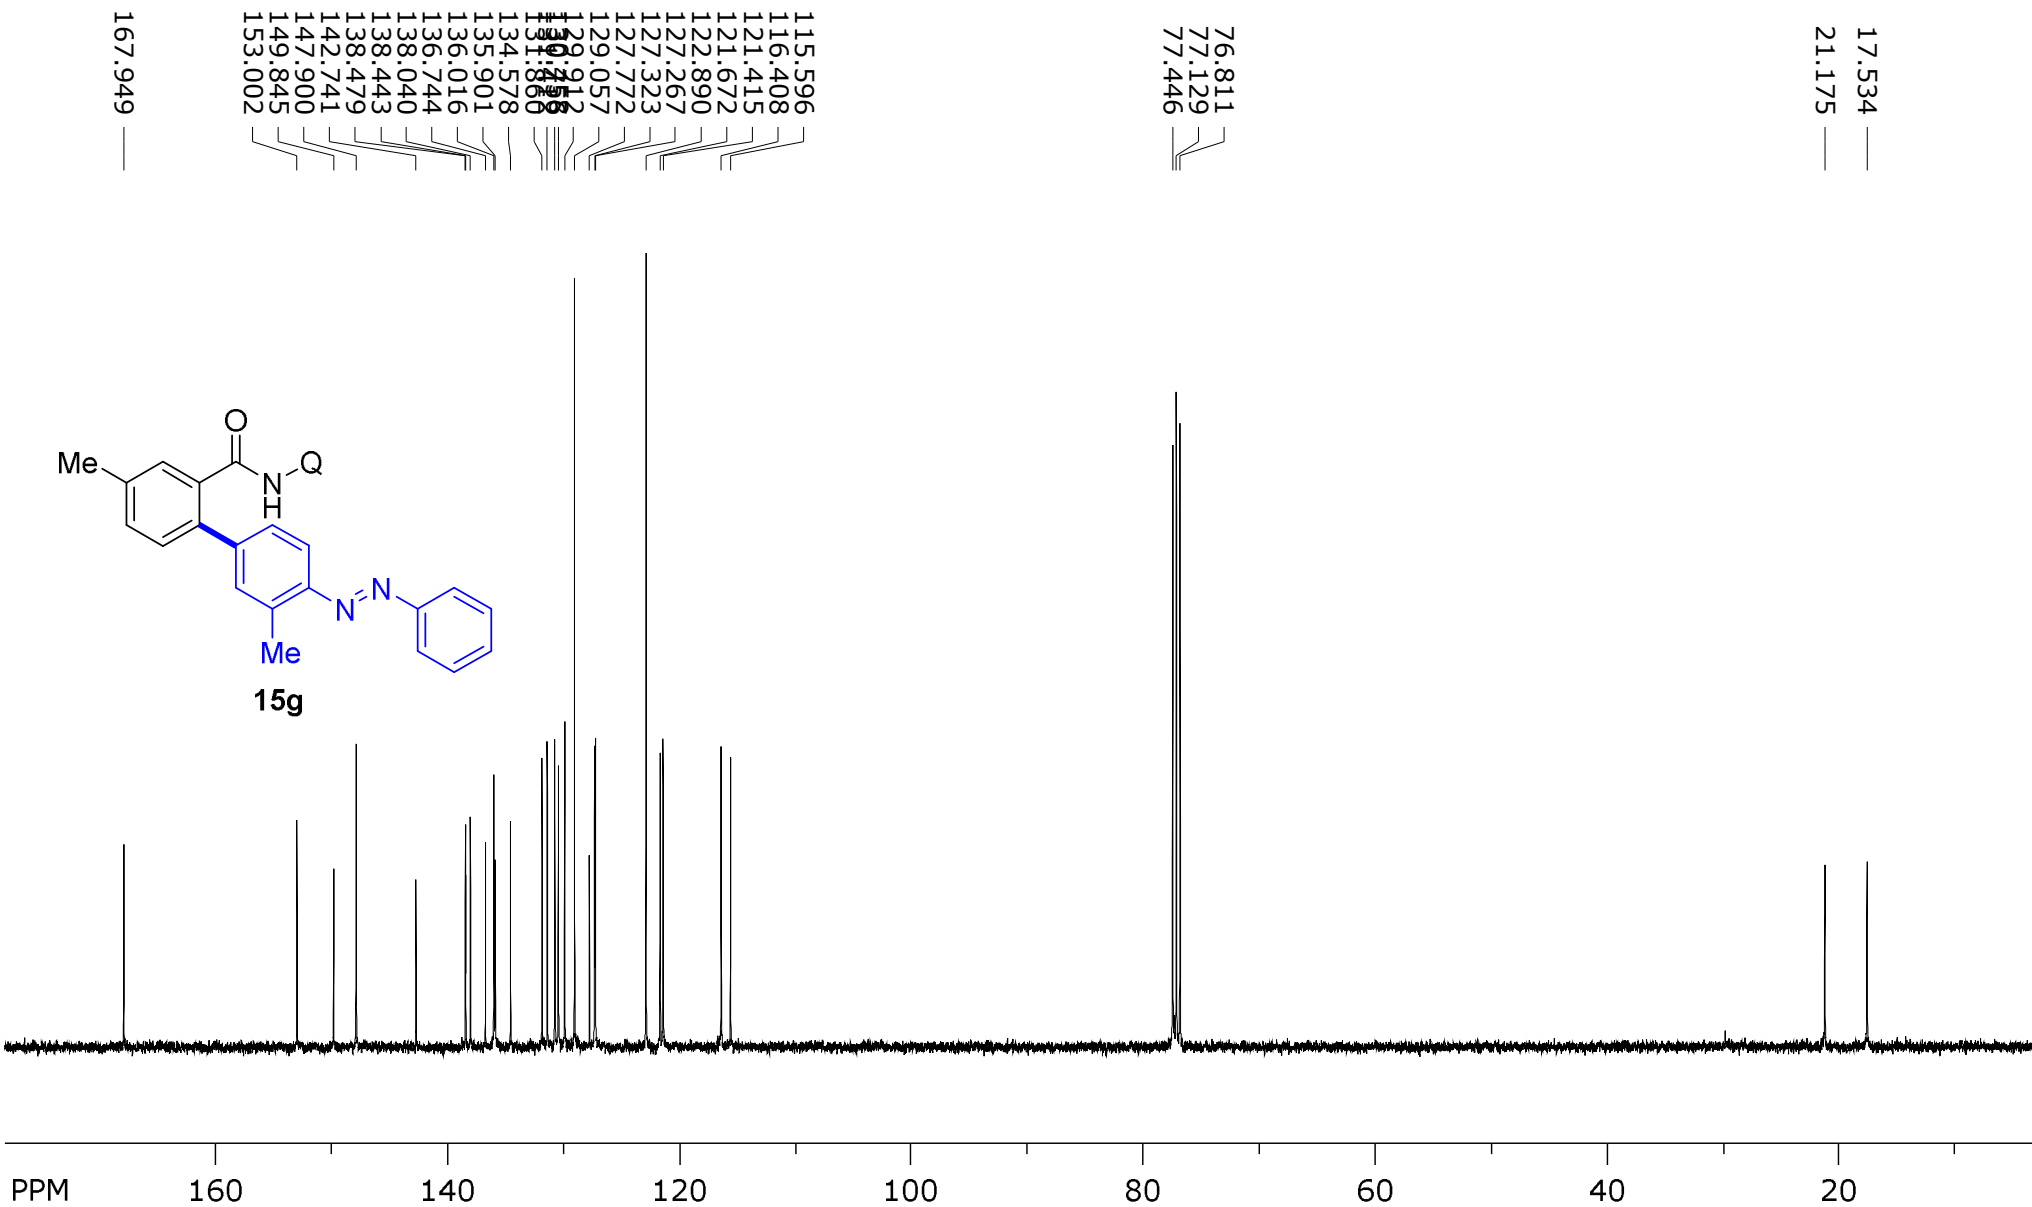

SpinWorks 4: SS 207 P

C13CPD256 CDCl3 /opt/topspin3.5pl2/nmrdata nmrsu 59

167.949 —  
153.002 —  
149.845 —  
147.900 —  
142.741 —  
138.479 —  
138.443 —  
138.040 —  
136.744 —  
136.016 —  
135.901 —  
134.578 —  
131.860 —  
131.412 —  
130.756 —  
129.912 —  
129.057 —  
127.772 —  
127.323 —  
127.267 —  
122.890 —  
121.672 —  
121.415 —  
116.408 —  
115.596 —

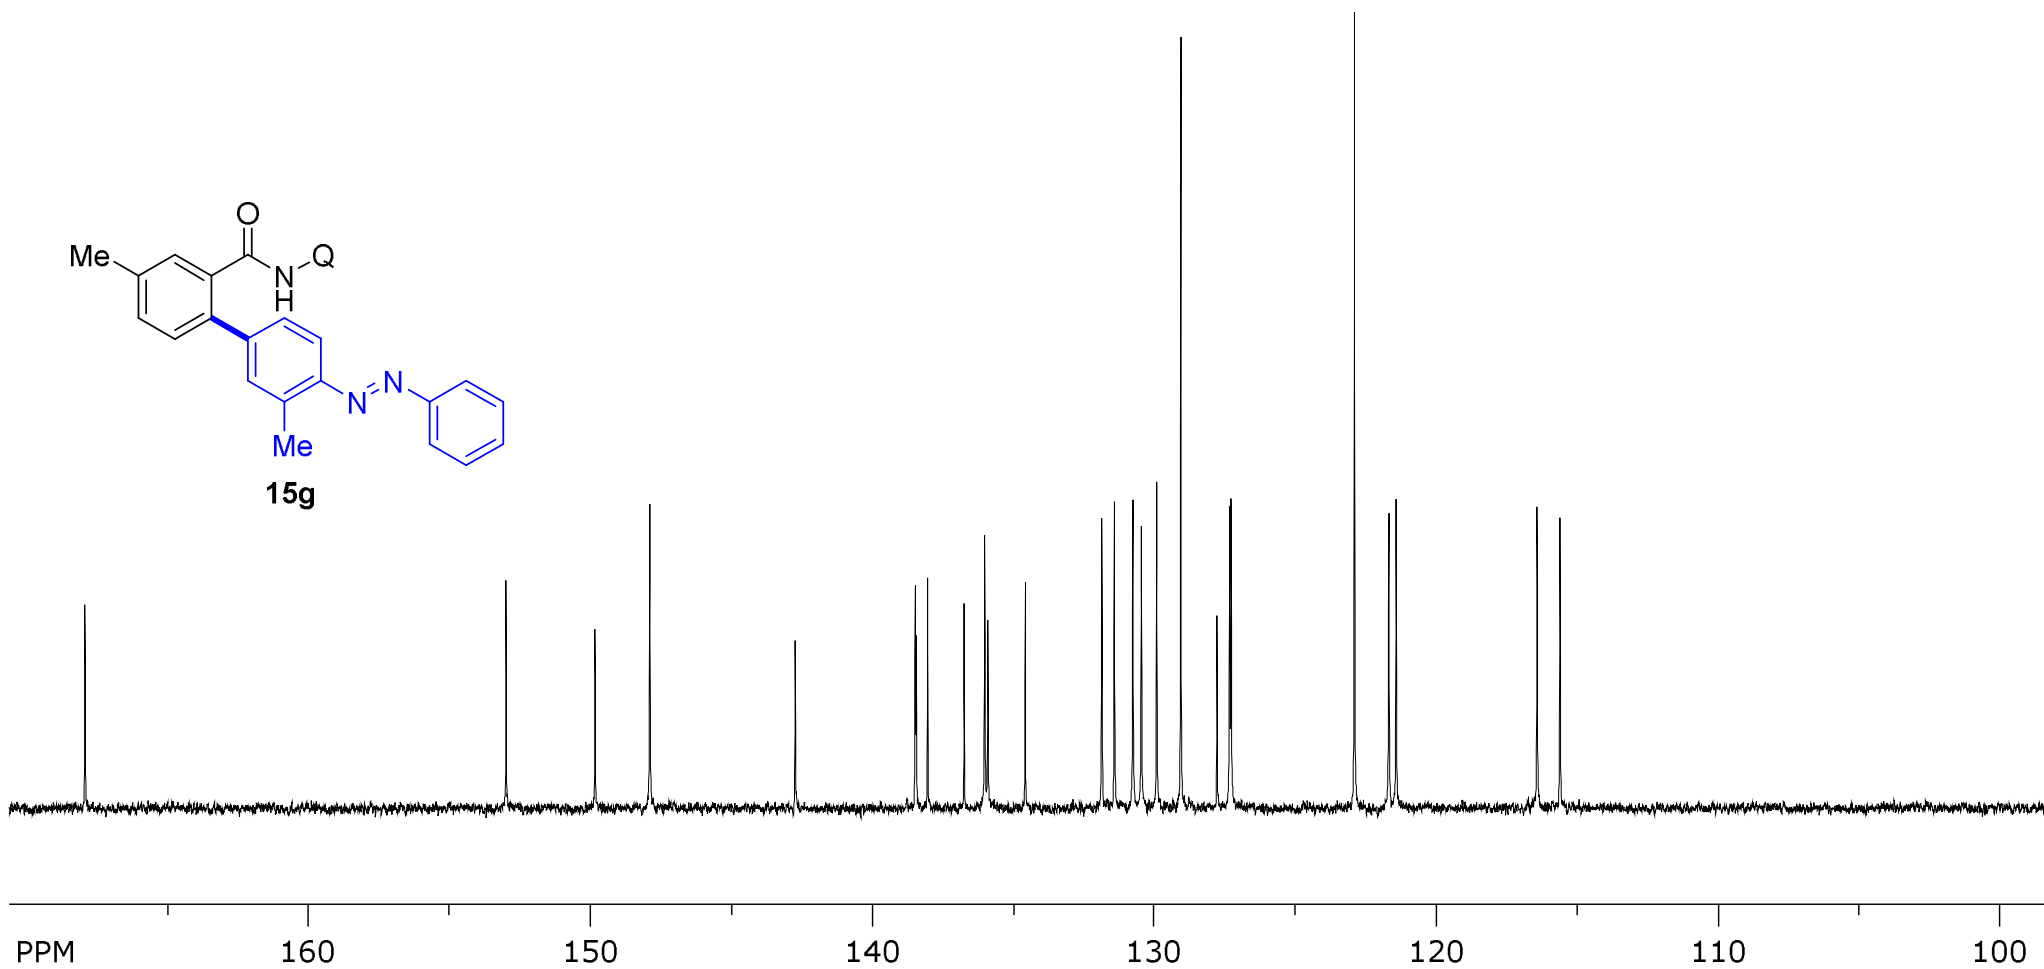



SpinWorks 4: SS-752 II  
PROTON CDCl3 /opt/topspin3.5pl2/nmrdata nmrsu 1

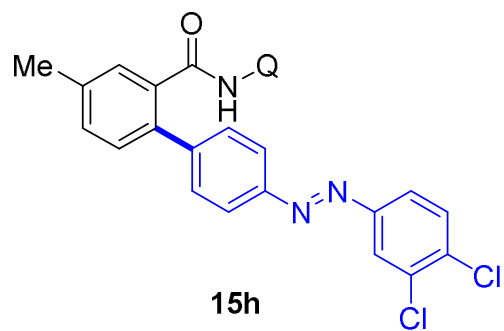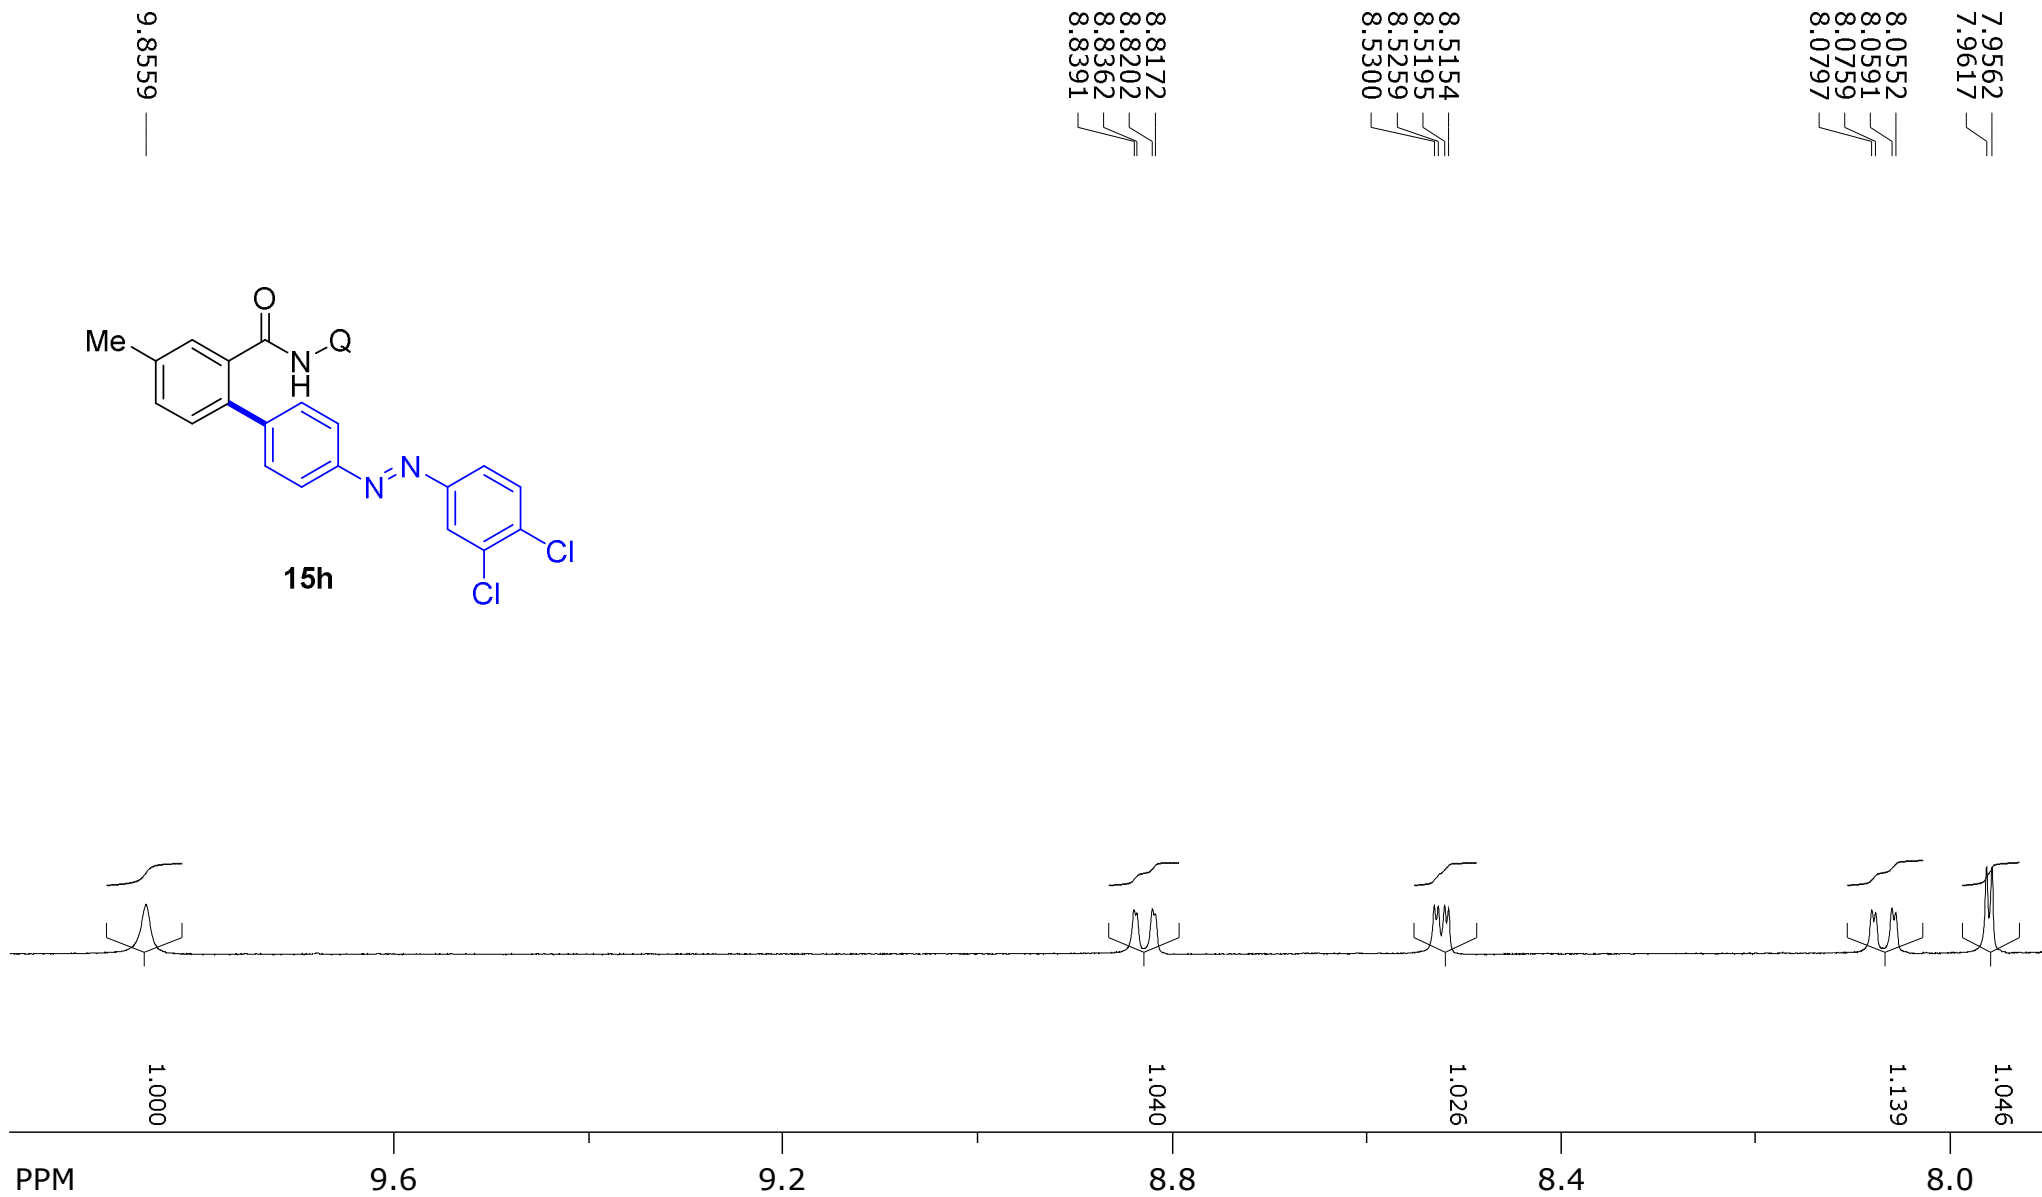



SpinWorks 4: SS-752 II  
PROTON CDCl3 /opt/topspin3.5pl2/nmrdata nmrsu 1

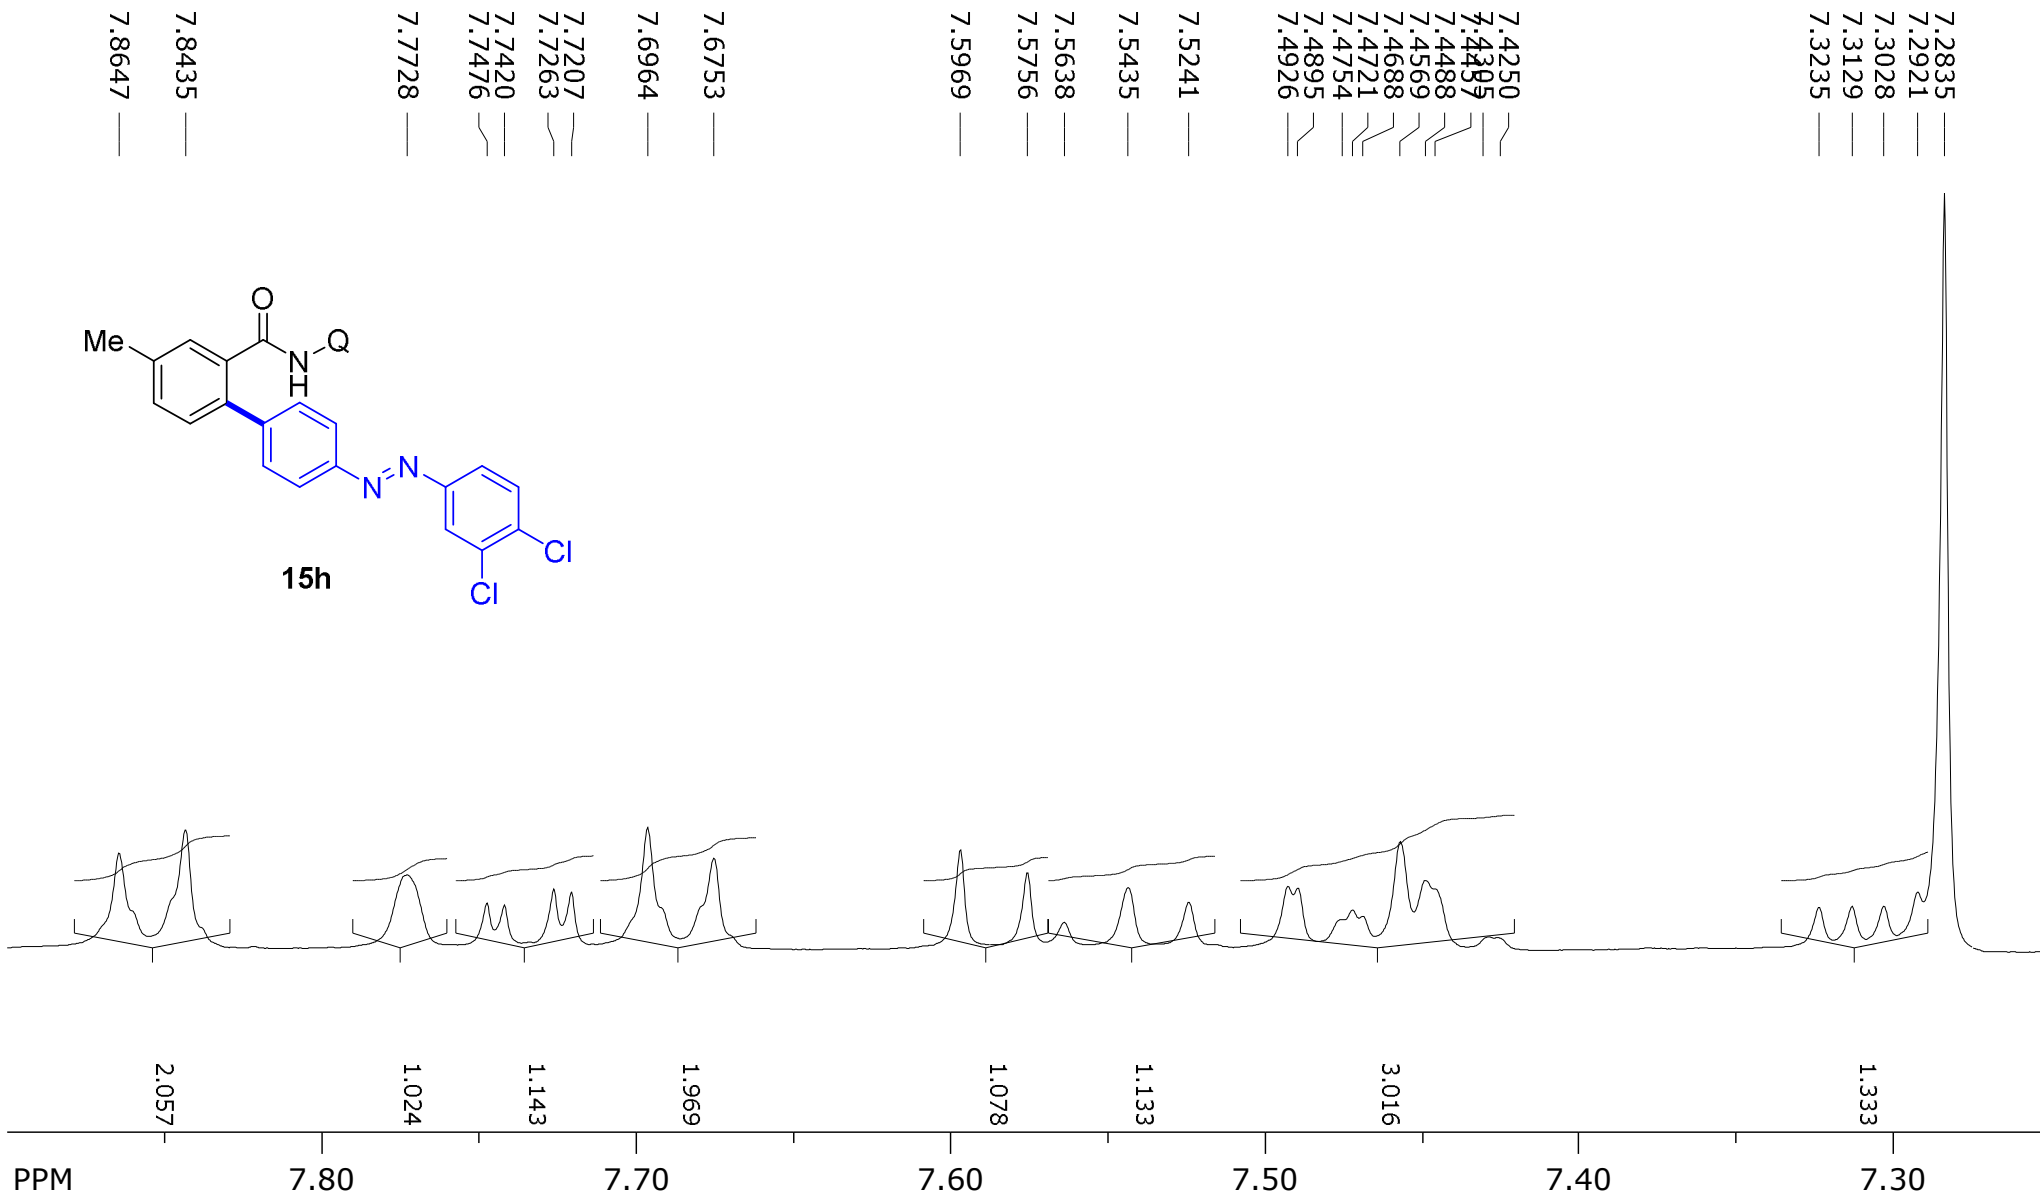

SpinWorks 4: SS 752 II  
C13CPD CDCl3 /opt/topspin3.5pl2/nmrdata nmrsu 8

116.432  
121.420  
121.713  
122.822  
123.288  
123.755  
127.288  
127.766  
129.907  
130.805  
131.714  
134.764  
136.042  
136.073  
136.353  
138.380  
138.409  
143.688  
147.881  
151.375  
151.476  
167.730

76.732  
77.048  
77.367

21.152

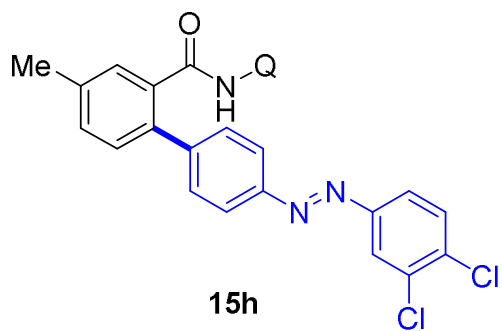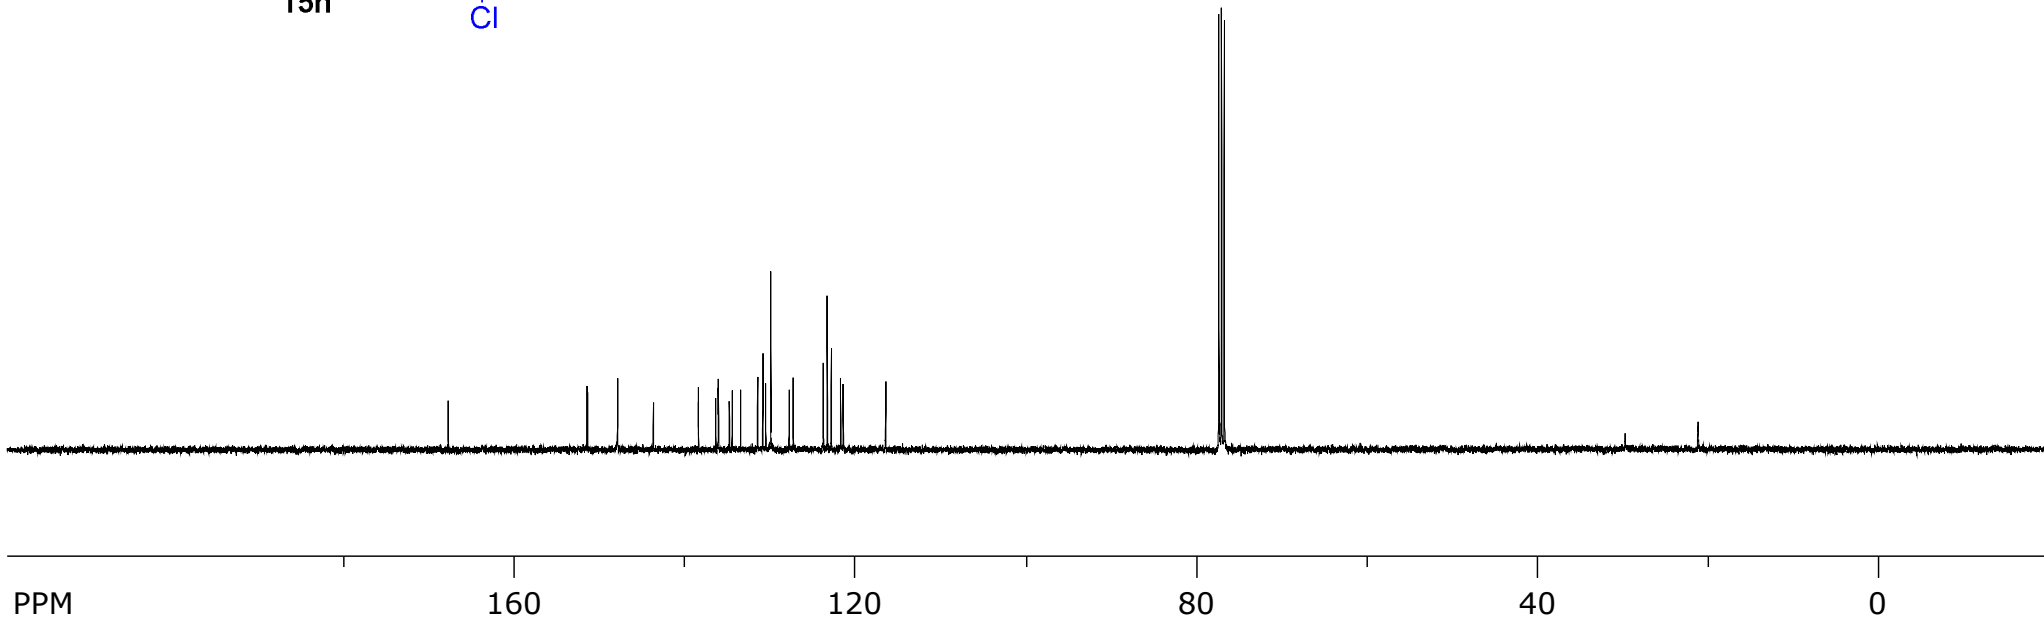

SpinWorks 4: SS 752 II  
C13CPD CDCl3 /opt/topspin3.5pl2/nmrdata nmrsu 8

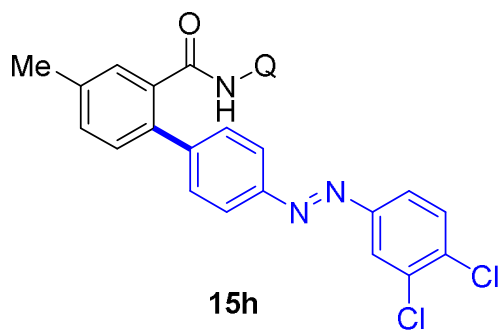

15h

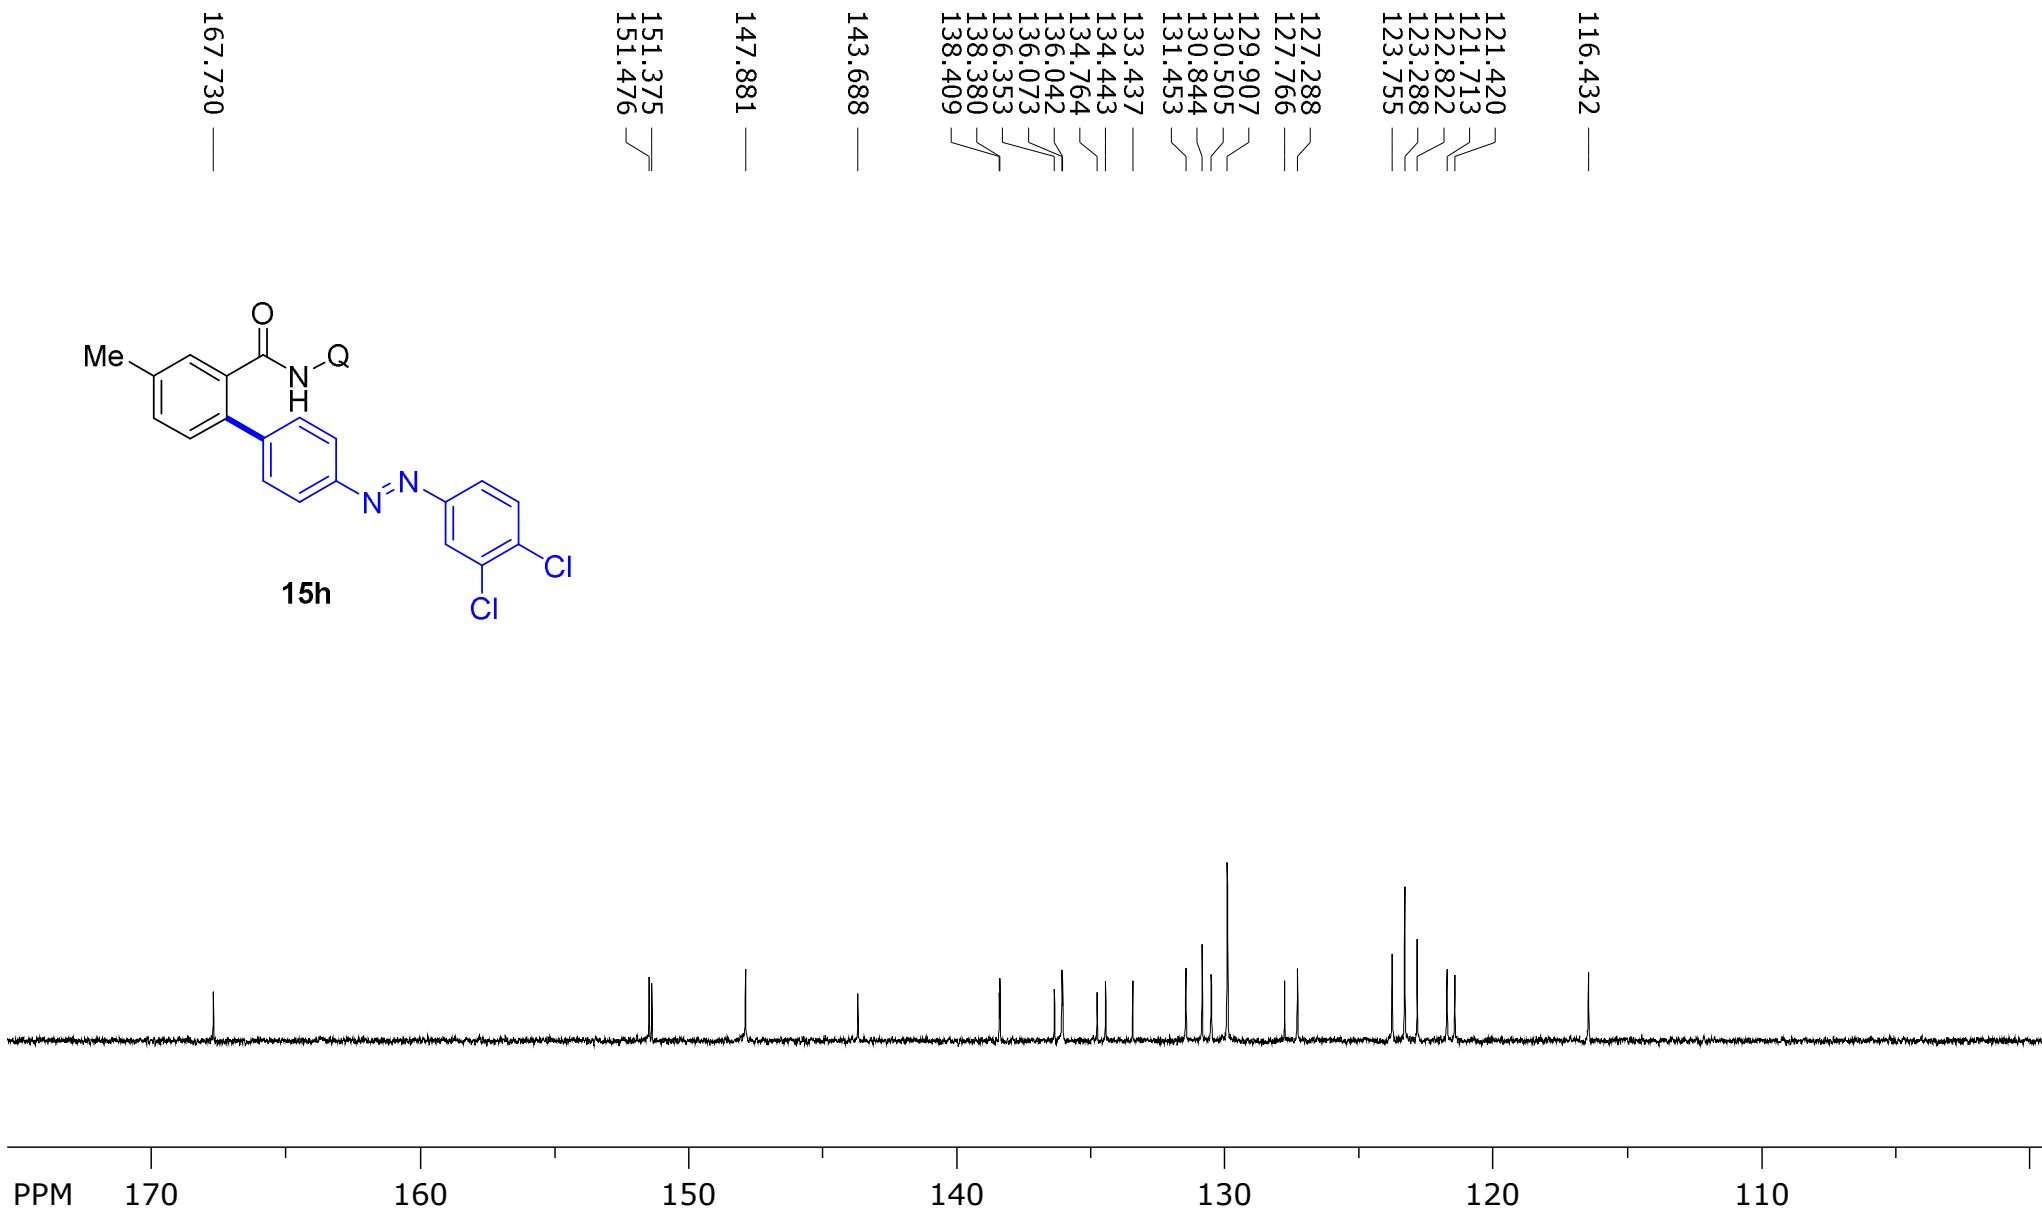

SpinWorks 4: SS 763  
PROTON CDCl3 /opt/topspin3.5pl2/nmrdata nmrsu 18

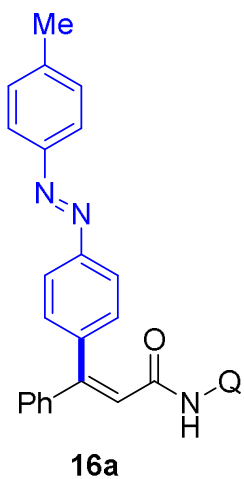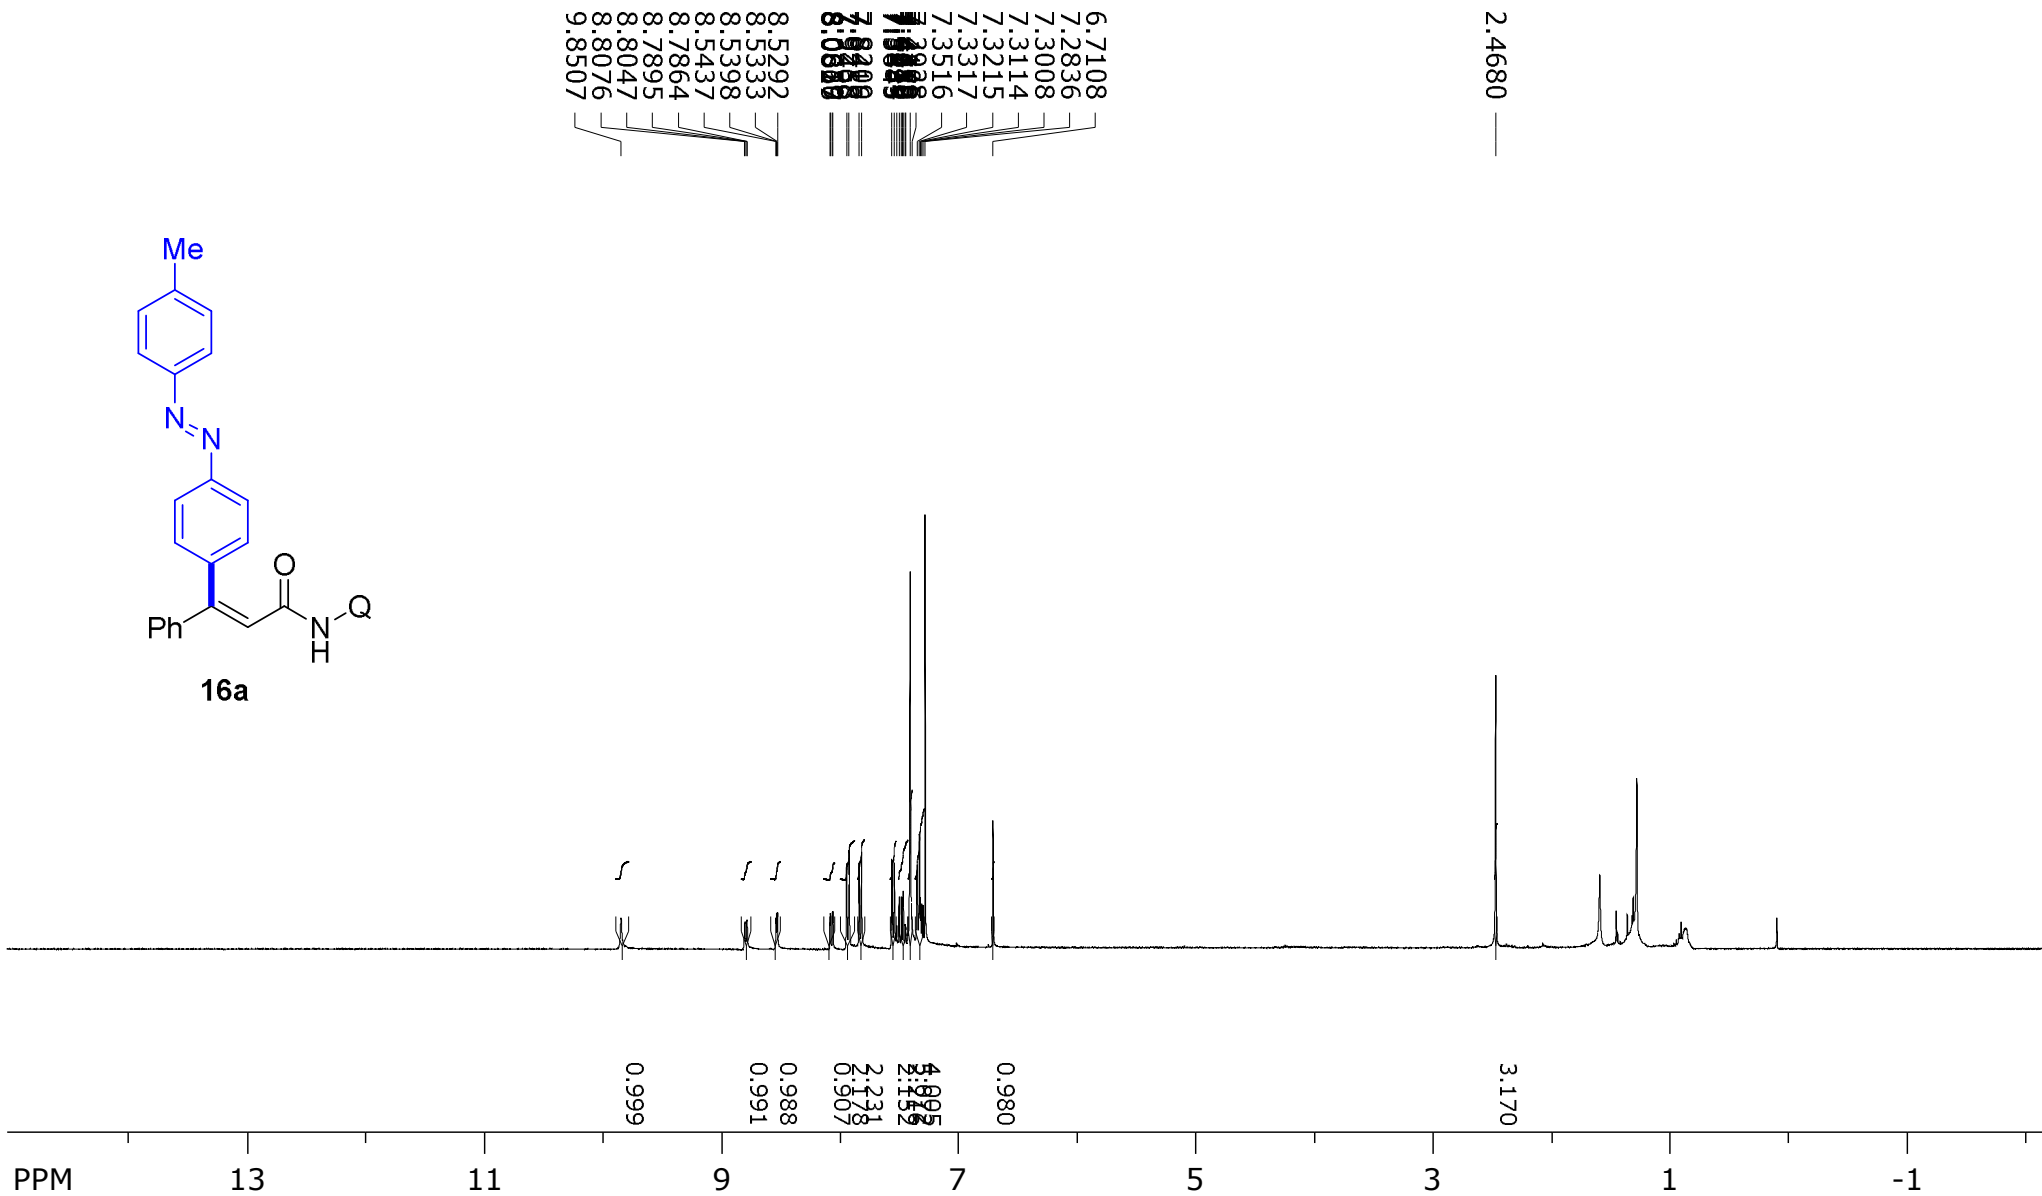

SpinWorks 4: SS 763  
PROTON CDCl3 /opt/topspin3.5pl2/nmrdata nmrsu 18

9.8507

8.7864  
8.7895  
8.8047  
8.8076

8.5292  
8.5333  
8.5398  
8.5437

8.0619  
8.0659  
8.0827  
8.0866

7.9258  
7.9468

7.8209  
7.8416

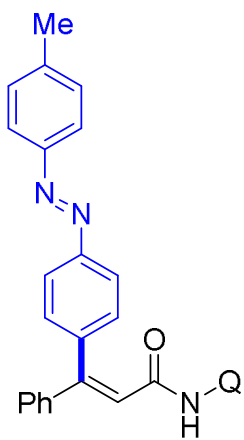

16a

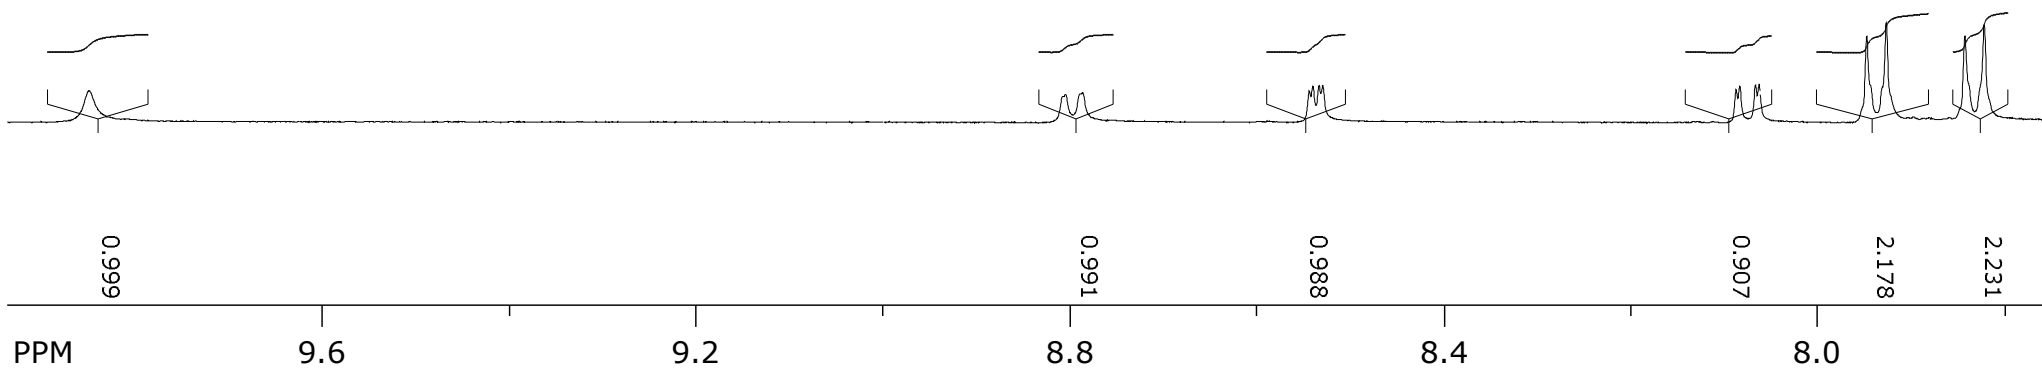

SpinWorks 4: SS 763  
PROTON CDCl3 /opt/topspin3.5pl2/nmrdata nmrsu 18

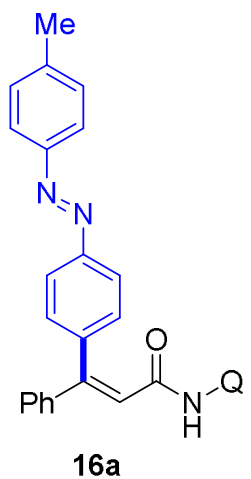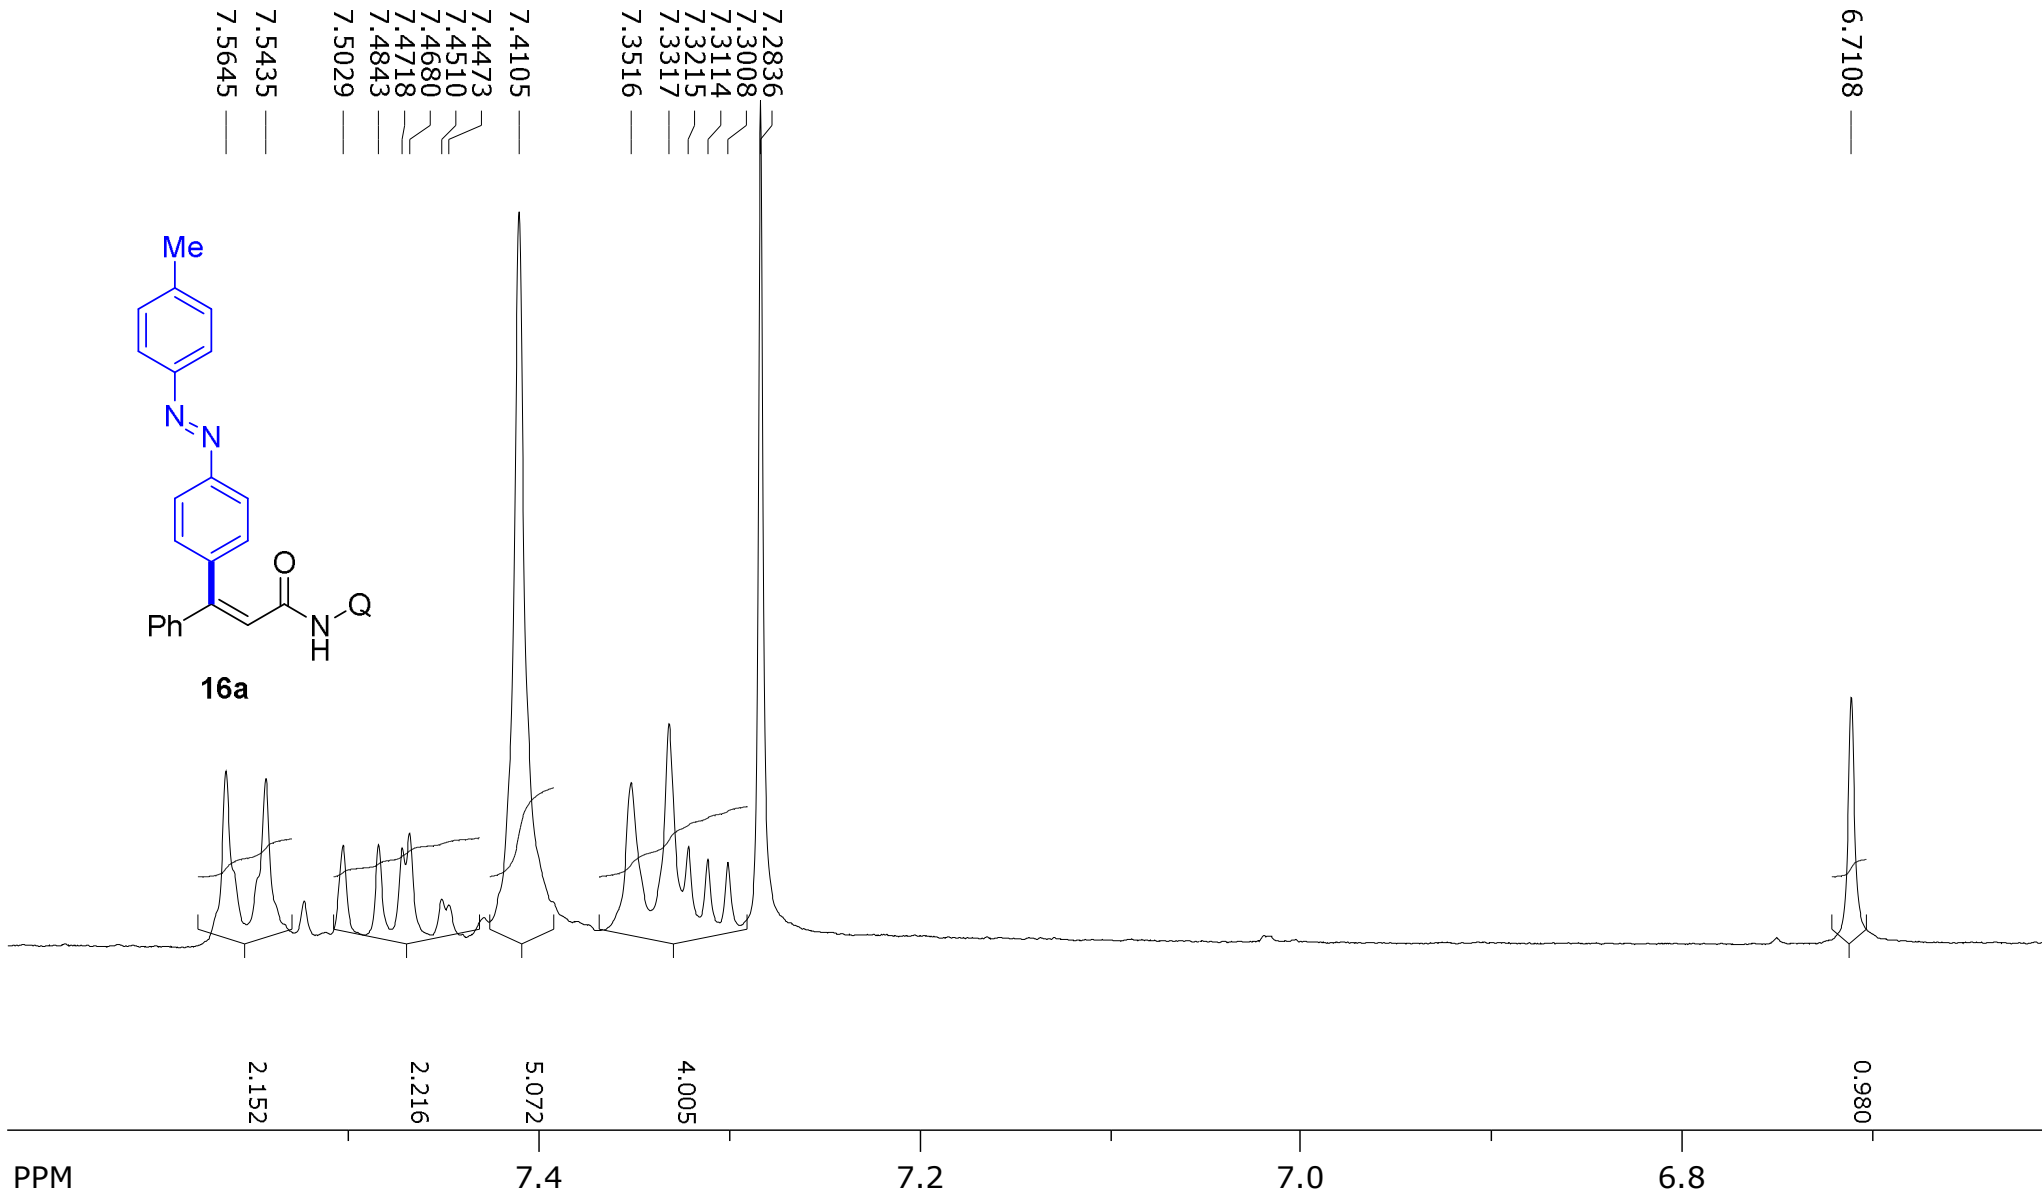

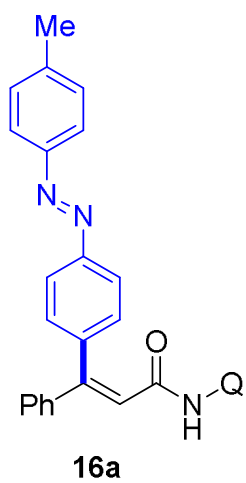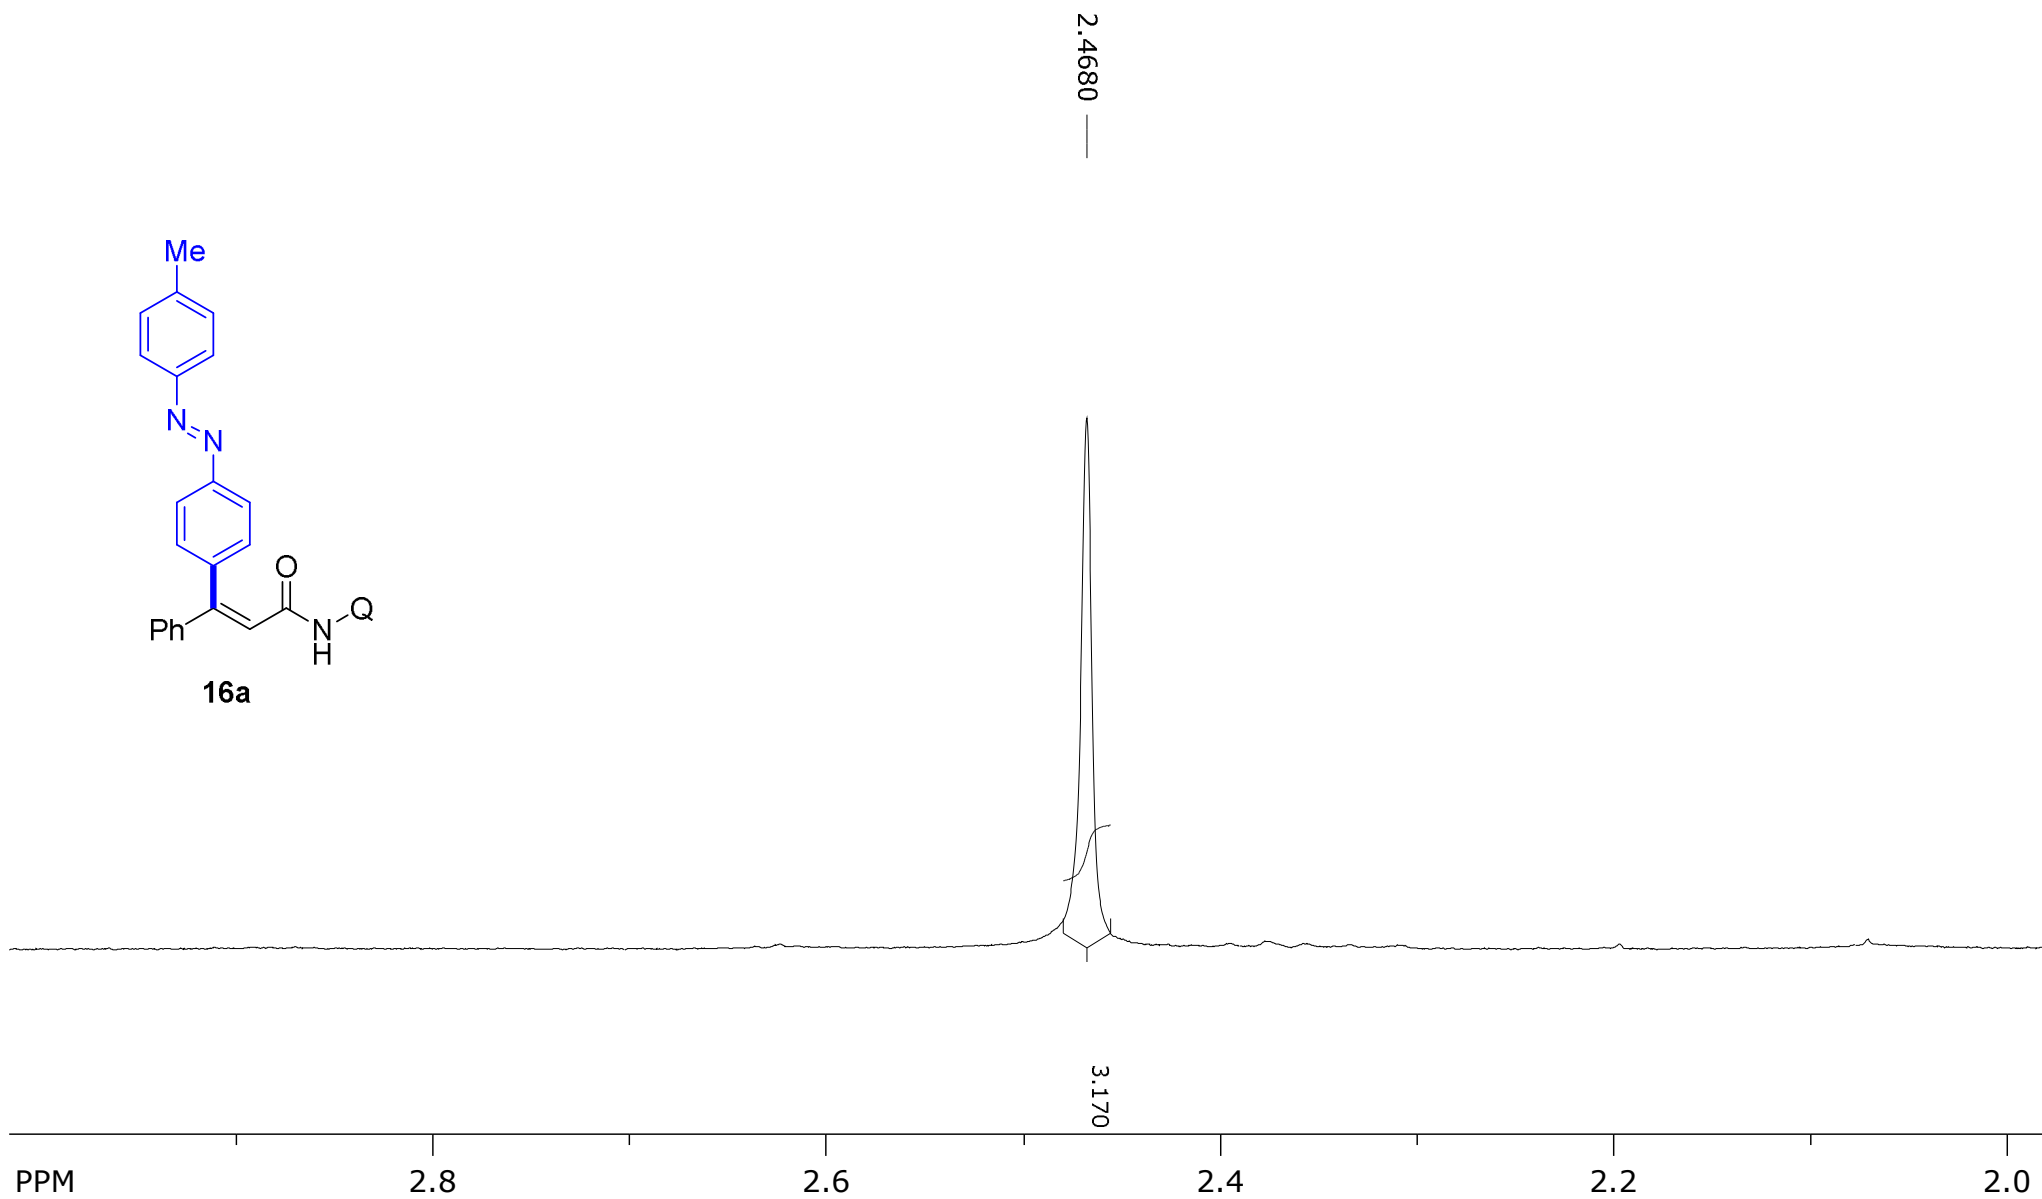

SpinWorks 4: SS-763

C13CPD256 CDCl3 /opt/topspin3.5pl2/nmrdata nmrsu 39

116.489  
121.437  
121.469  
122.890  
122.953  
123.190  
127.340  
127.790  
129.349  
129.379  
130.676  
134.483  
136.082  
138.333  
140.927  
140.986  
141.740  
147.849  
150.850  
151.421  
152.680  
164.312

21.564

76.722  
77.039  
77.357

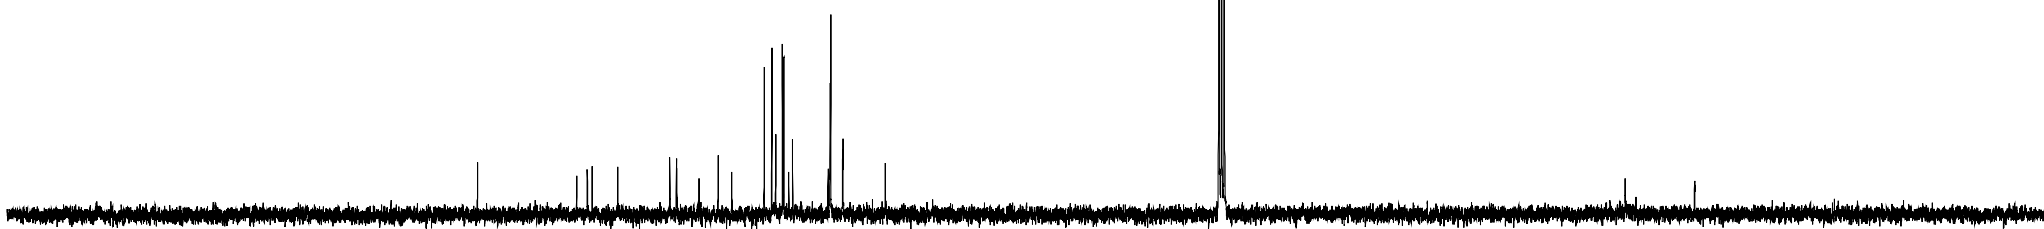

PPM 160 120 80 40 0



SpinWorks 4: SS-763  
C13CPD256 CDCl3 /opt/topspin3.5pl2/nmrdata nmrsu 39

164,312 —  
150,850 —  
151,421 —  
152,680 —  
147,849 —  
140,927 —  
140,986 —  
141,740 —  
138,333 —  
136,082 —  
134,483 —  
130,676 —  
129,791 —  
128,540 —  
128,378 —  
127,790 —  
127,340 —  
123,190 —  
122,953 —  
122,890 —  
121,469 —  
121,437 —  
116,489 —

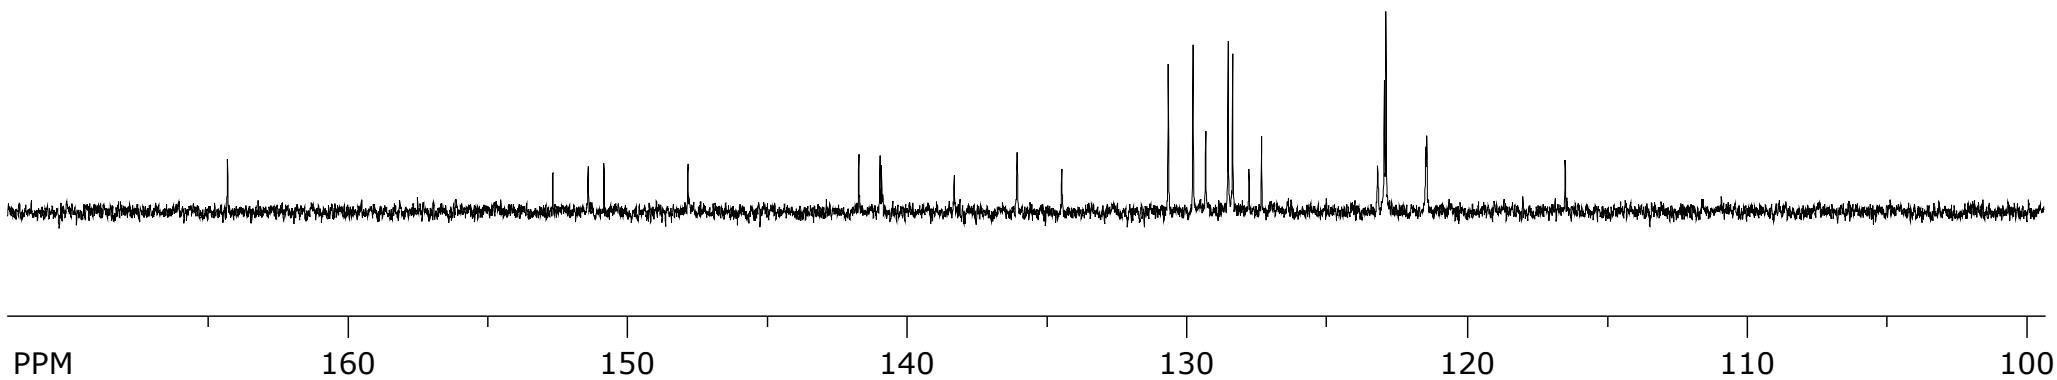

SpinWorks 4: SS 770  
PROTON CDCl3 /opt/topspin3.5pl2/nmrdata nmrsu 2

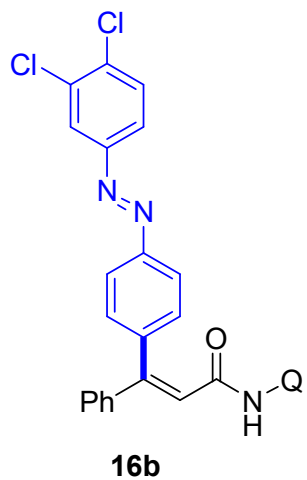

9.8665  
8.7957  
8.7911  
8.7783  
8.5819  
8.5779  
8.5714  
8.5674  
8.1145  
8.0009  
7.9969  
7.9929  
7.3981  
7.3676  
7.3569  
7.3469  
7.3363  
7.2841  
6.7288

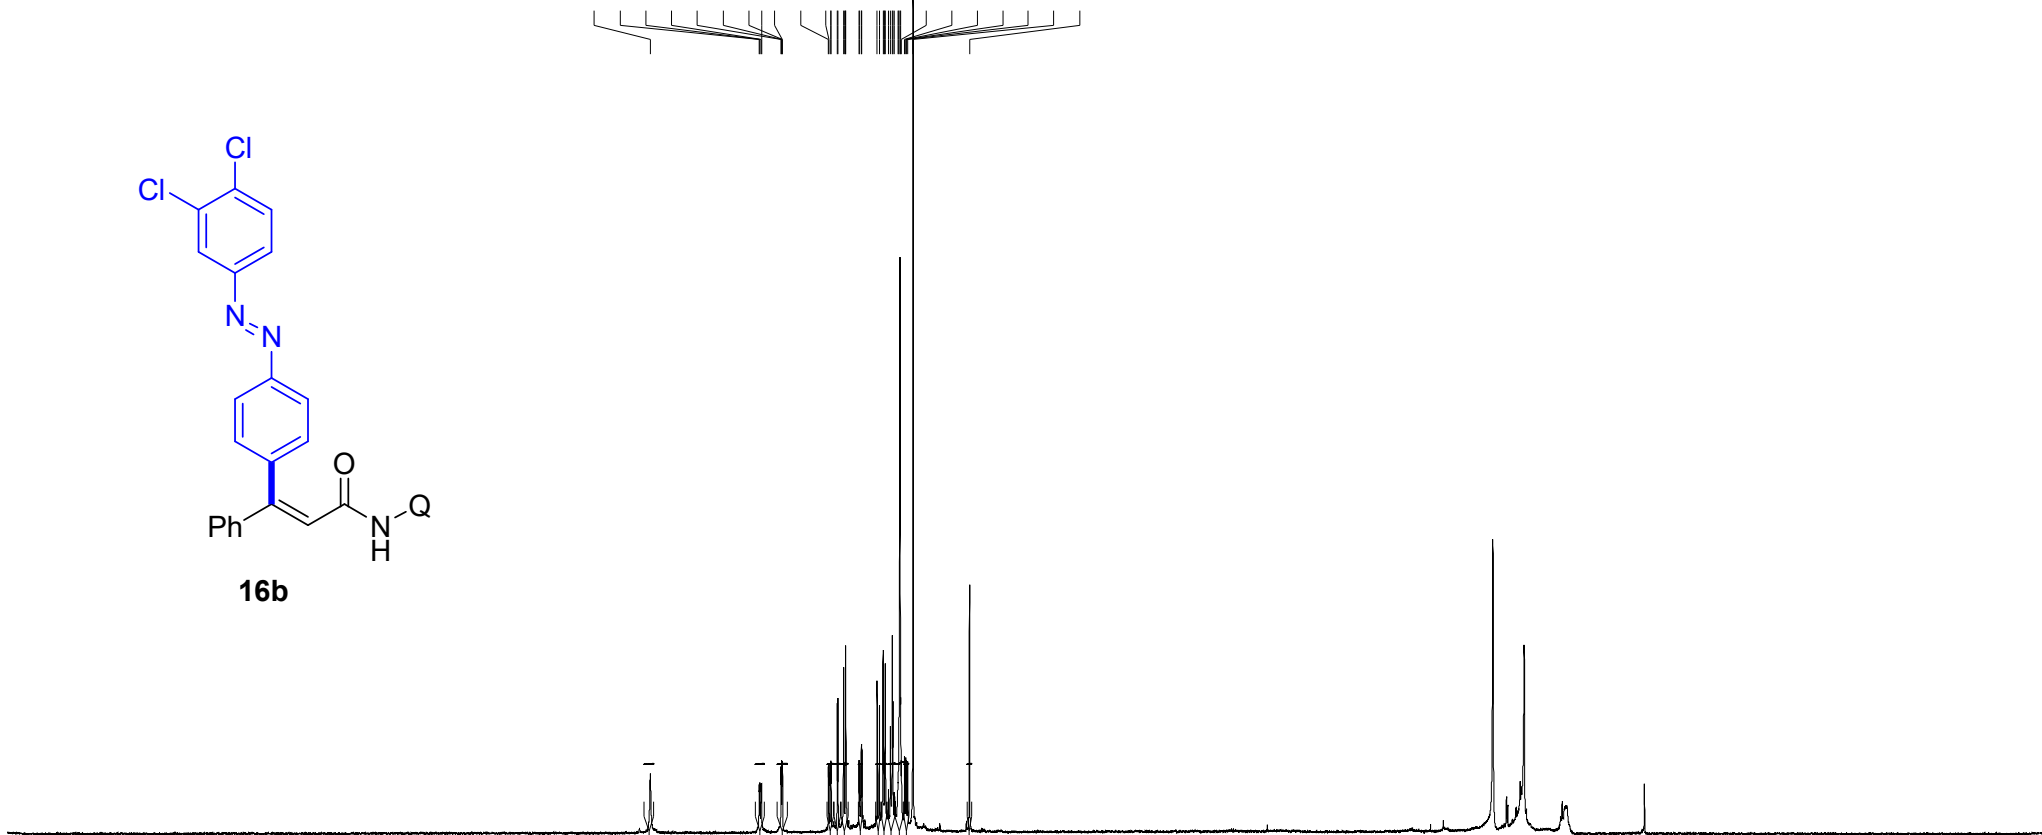

0.877  
1.042  
0.990  
1.019  
1.027  
1.035  
1.043  
0.911

PPM 12 8 4 0

SpinWorks 4: SS 770  
PROTON CDCl3 /opt/topspin3.5pl2/nmrdata nmrsu 2

8.7726  
8.7783  
8.7911  
8.7957

8.5674  
8.5714  
8.5779  
8.5819

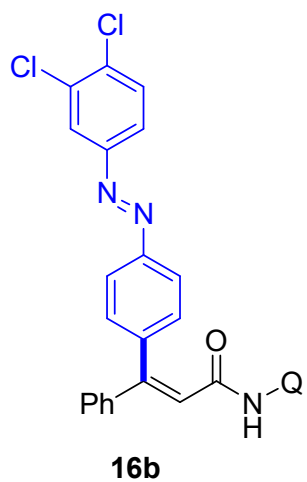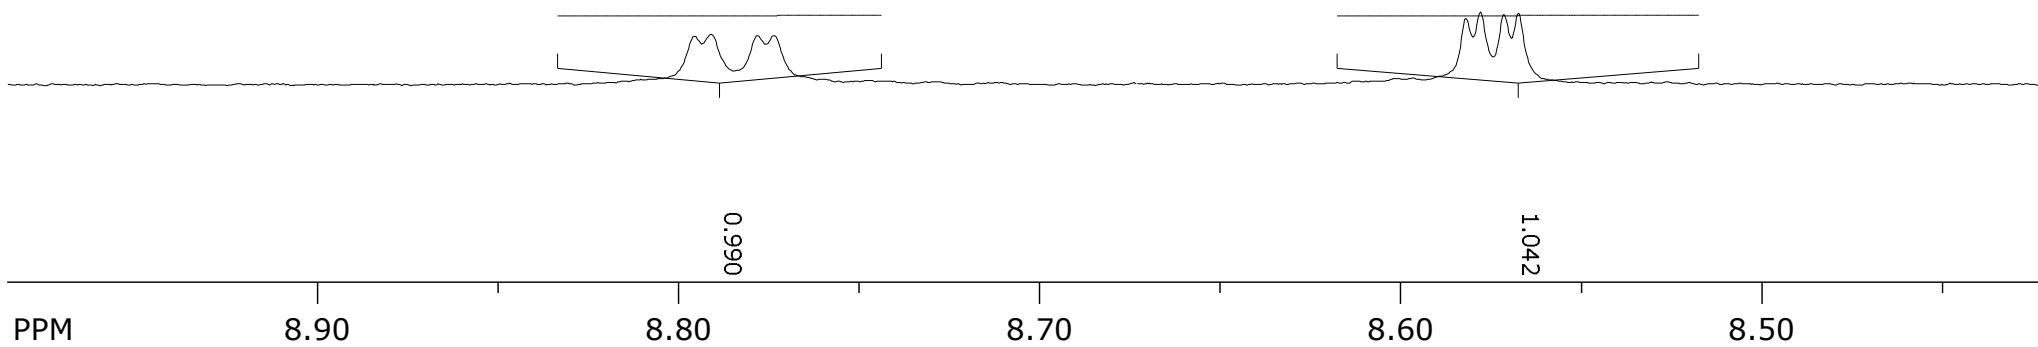

SpinWorks 4: SS 770  
PROTON CDCl3 /opt/topspin3.5pl2/nmrdata nmrsu 2

8.1105  
8.1145

8.0899  
8.0939

8.0226  
8.0282

7.9454  
7.9496  
7.9600  
7.9663

7.7865  
7.7921  
7.8079  
7.8134

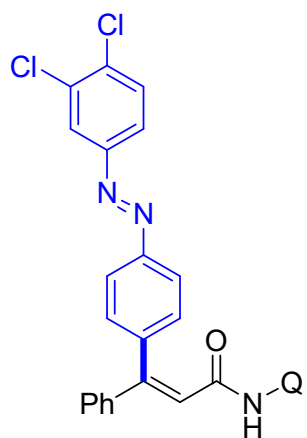

16b

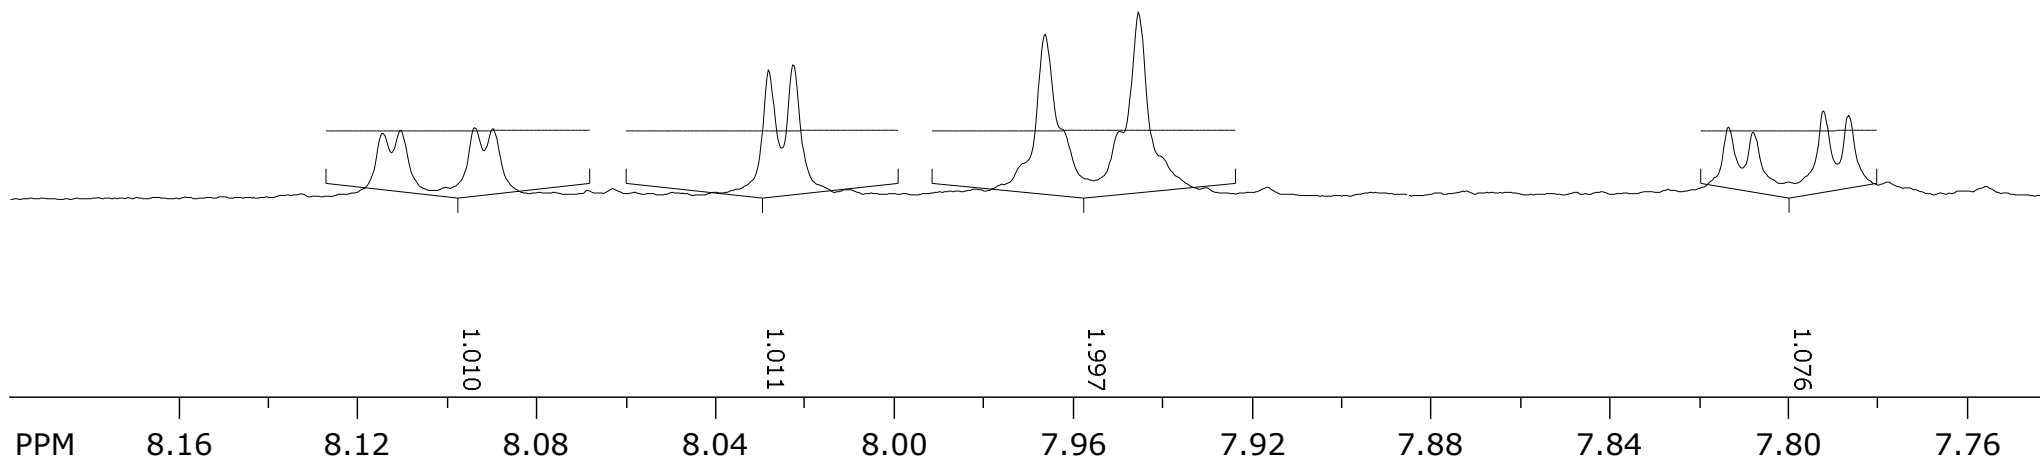

SpinWorks 4: SS 770  
PROTON CDCl3 /opt/topspin3.5pl2/nmrdata nmrsu 2

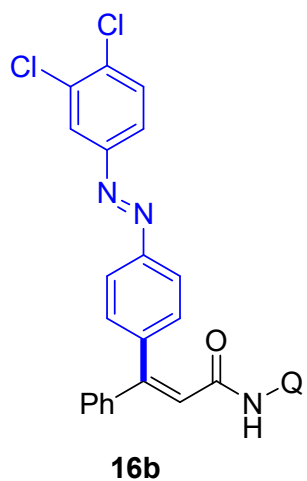

7.6361

7.6148

7.5781

7.5724

7.5611

7.5572

7.5262

7.5056

7.4876

7.4821

7.4663

7.4307

7.4272

7.4125

7.4053

7.3981

7.3676

7.3569

7.3469

7.3363

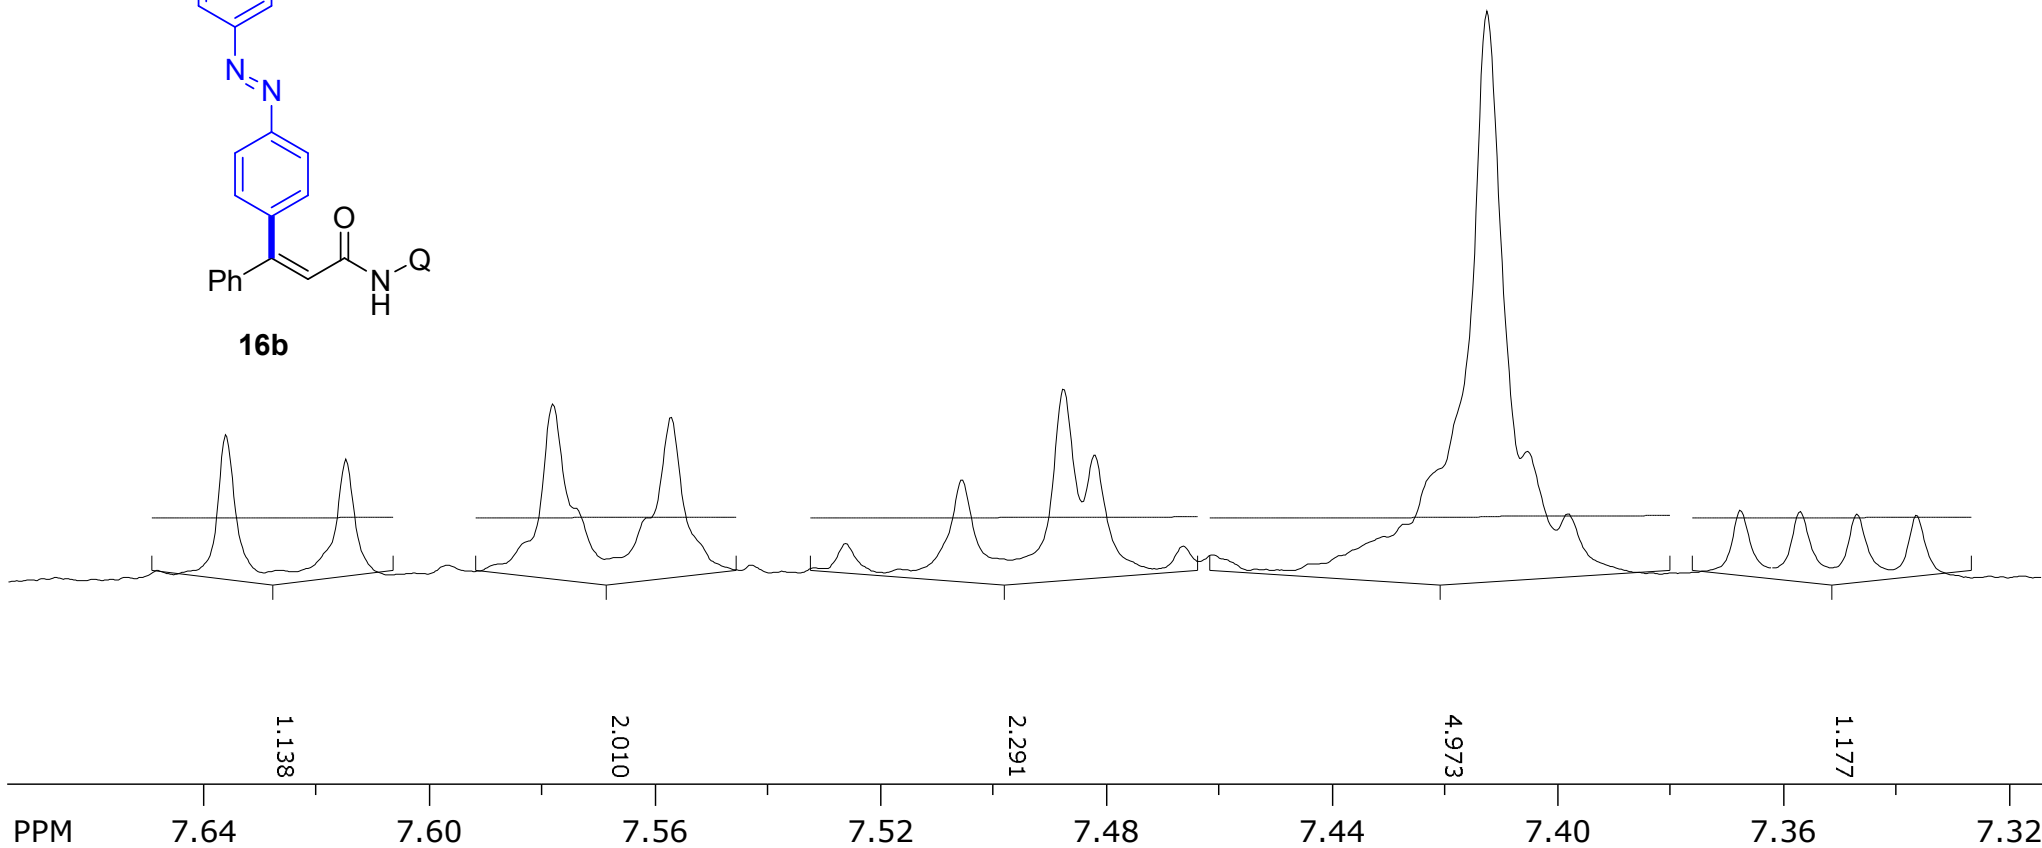

SpinWorks 4: SS 770  
PROTON CDCl3 /opt/topspin3.5pl2/nmrdata nmrsu 2

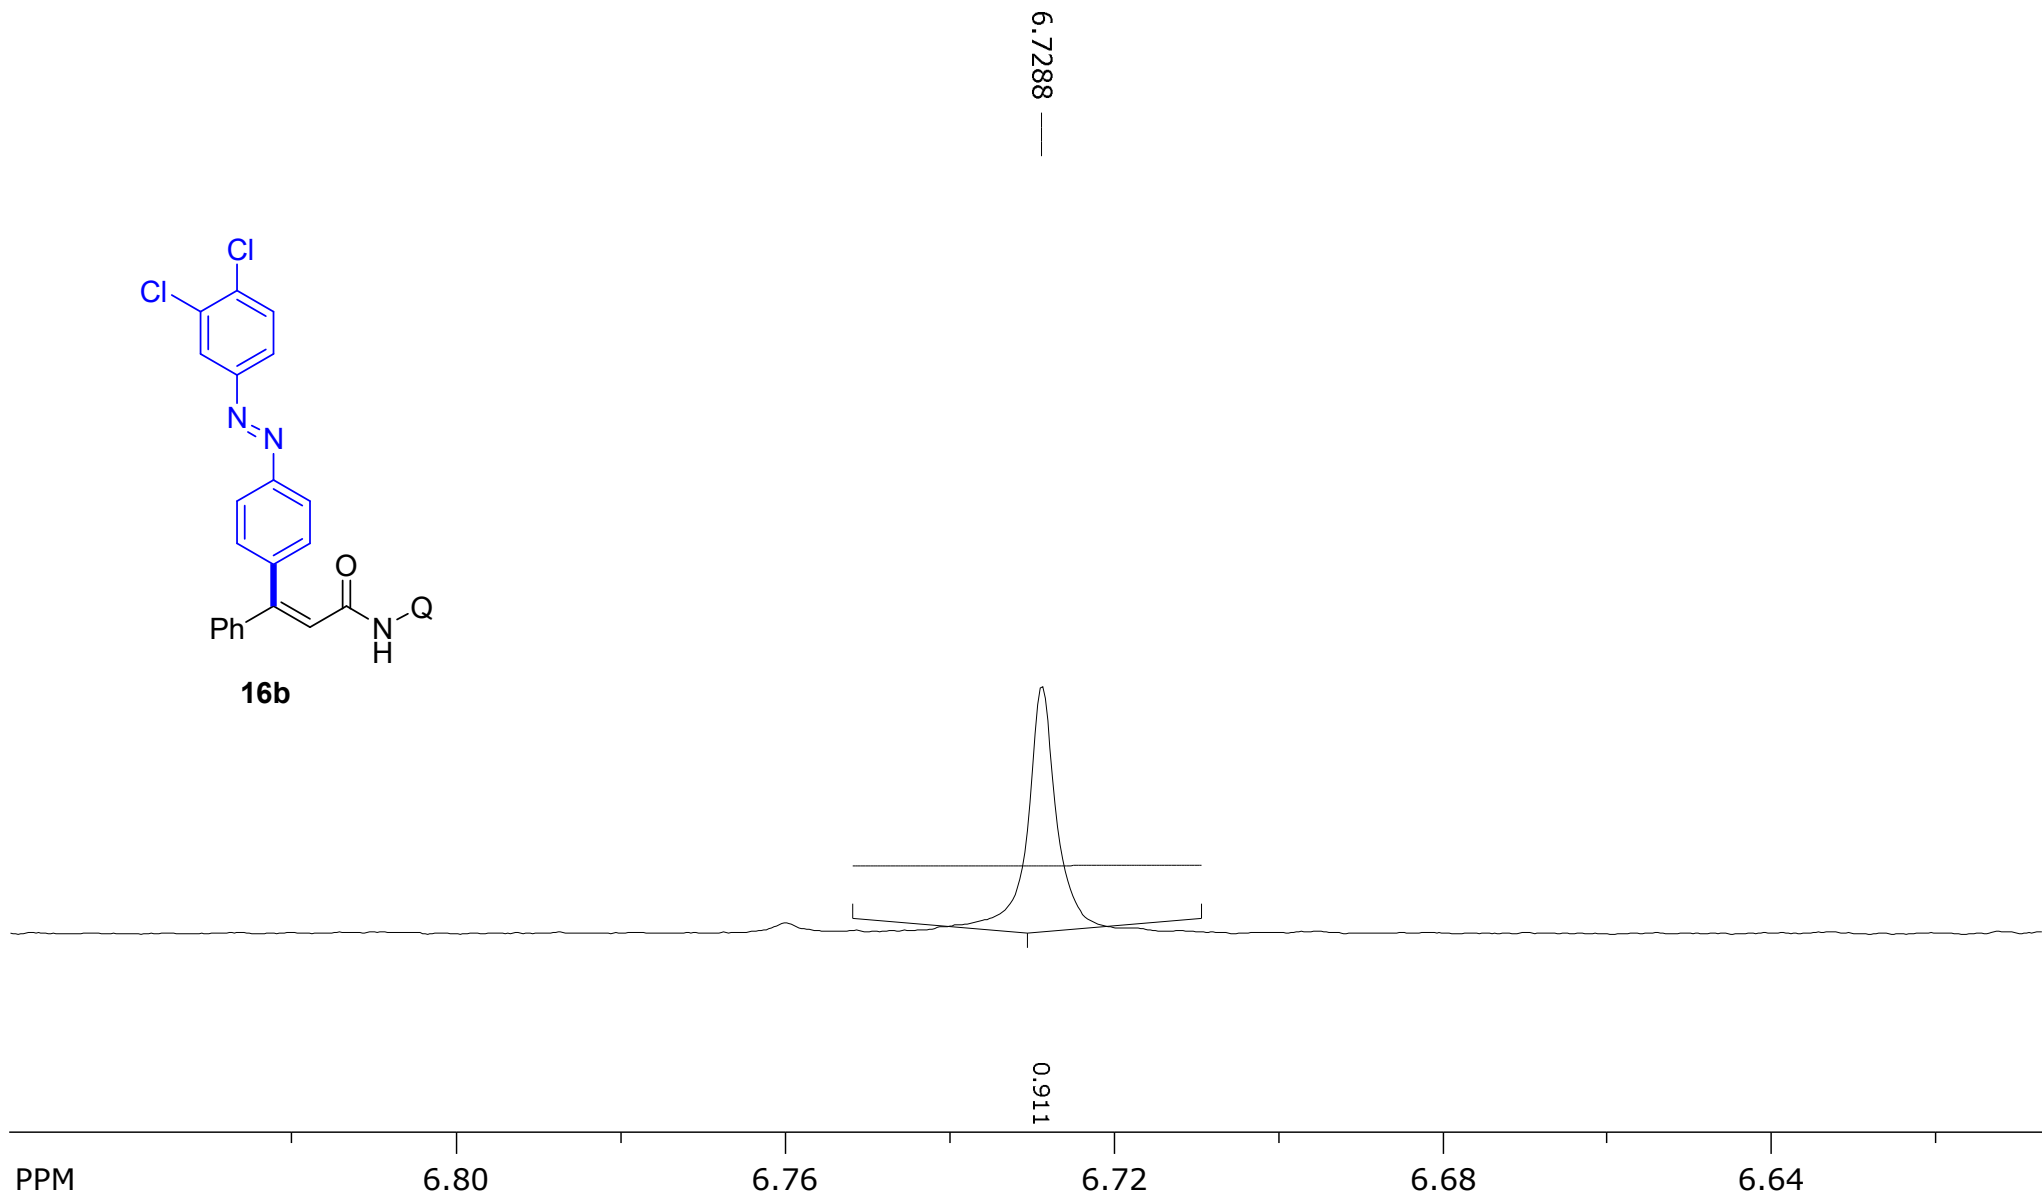

SpinWorks 4: SS-770  
C13CPD256 CDCl3 /opt/topspin3.5pl2/nmrdata nmrsu 40

116.572  
121.479  
121.577  
122.874  
123.098  
123.258  
123.887  
127.372  
127.849  
128.250  
130.550  
133.515  
134.419  
134.966  
136.197  
138.326  
140.795  
142.251  
147.848  
151.536  
151.589  
152.060  
164.082

76.731  
77.049  
77.367



PPM

160

120

80

40

0

SpinWorks 4: SS-770  
C13CPD256 CDCl3 /opt/topspin3.5pl2/nmrdata nmrsu 40

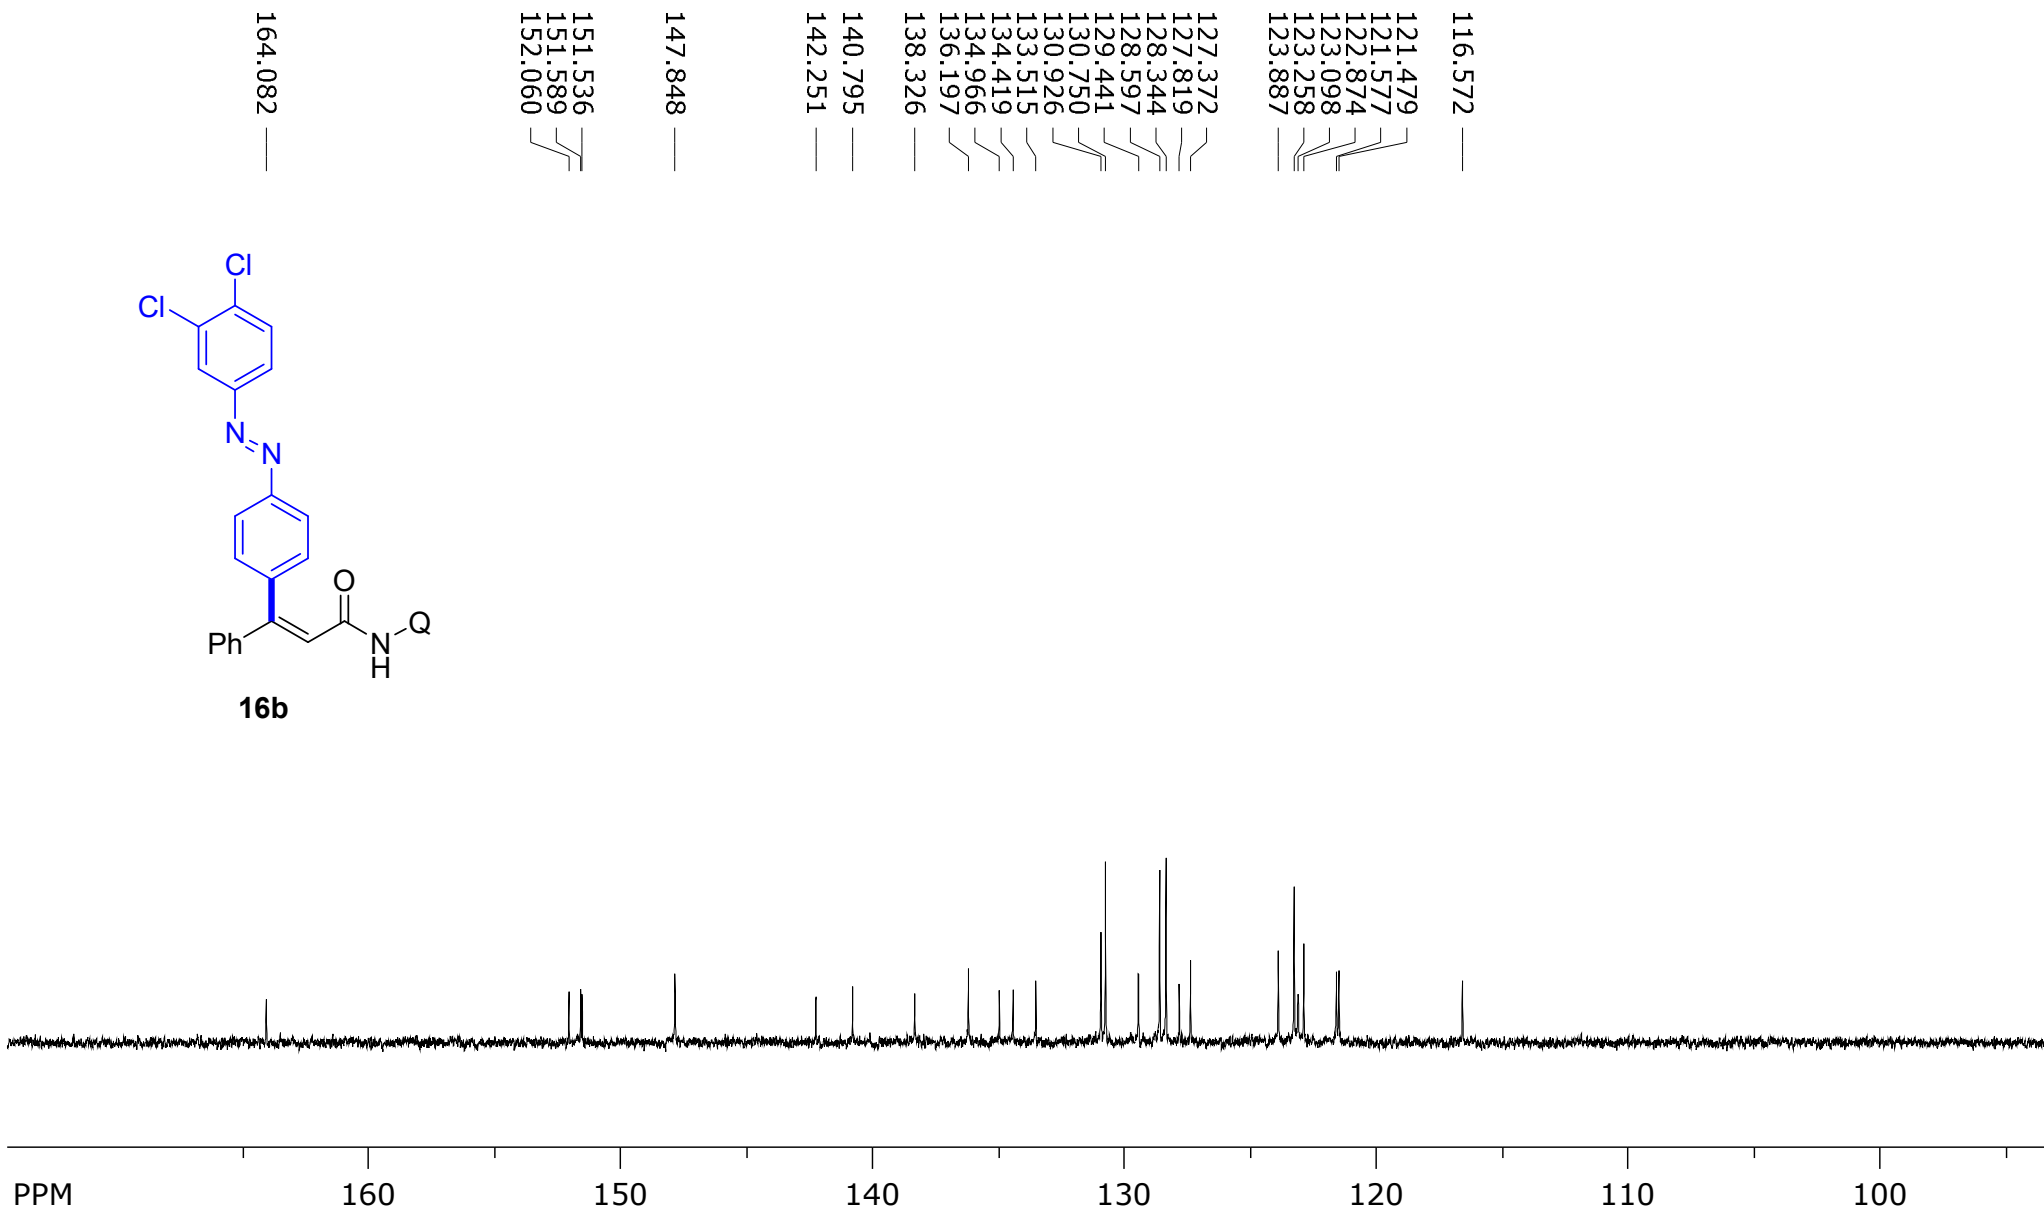

PPM

160

150

140

130

120

110

100



SpinWorks 4: SS-762 REP  
PROTON CDCl3 /opt/topspin3.5pl2/nmrdata nmrsu 33

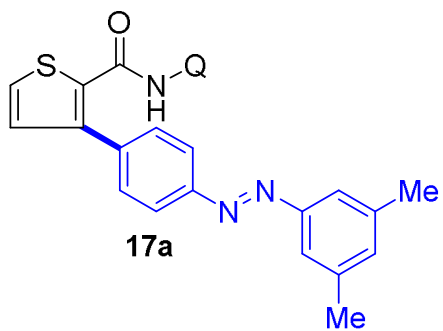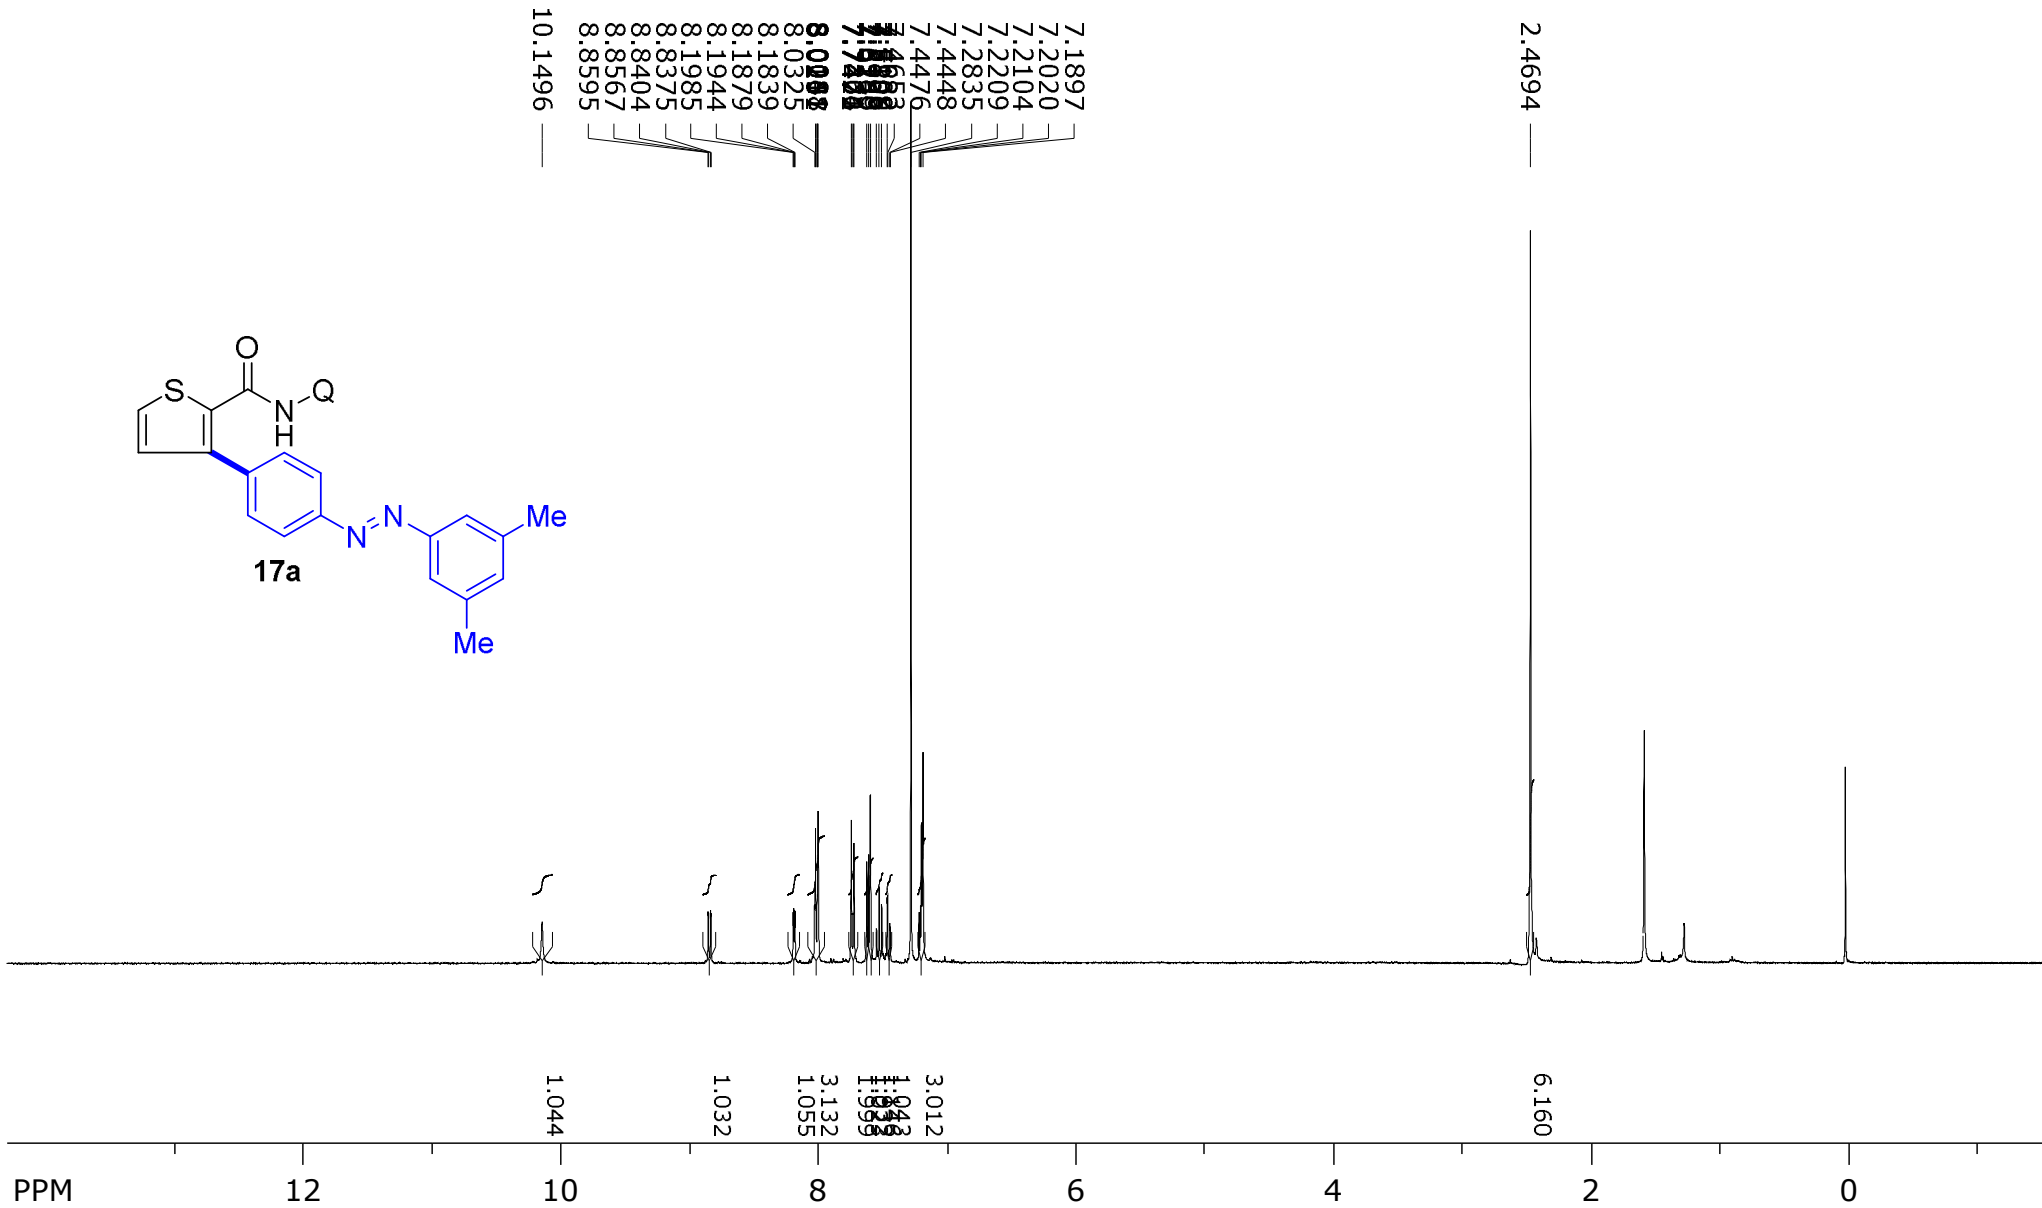

SpinWorks 4: SS-762 REP  
PROTON CDCl3 /opt/topspin3.5pl2/nmrdata nmrsu 33

10.1496

8.8375  
8.8404  
8.8567  
8.8595

8.0041  
8.0081  
8.0118  
8.0207  
8.0251  
8.0325  
8.1839  
8.1879  
8.1944  
8.1985

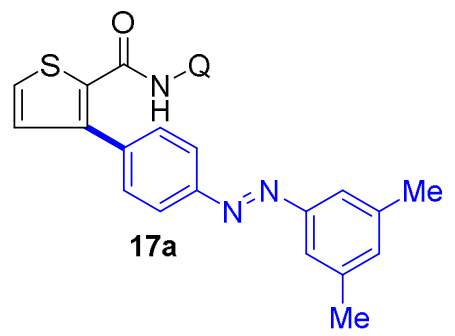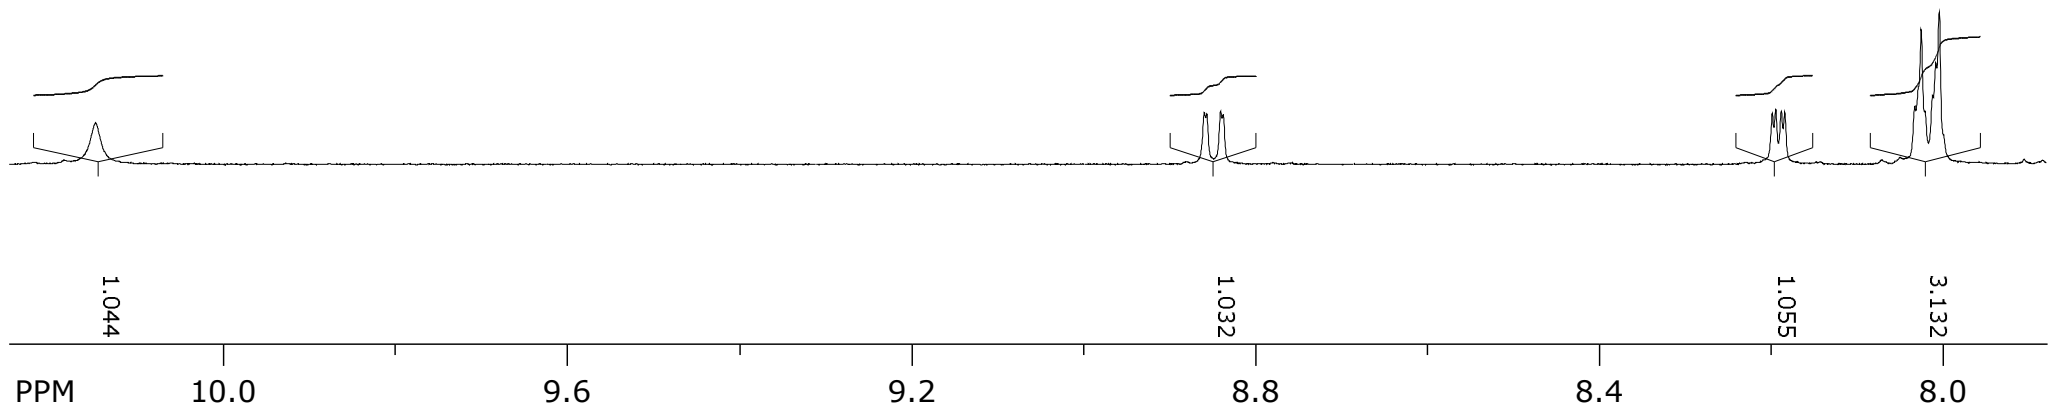

SpinWorks 4: SS-762 REP  
PROTON CDCl3 /opt/topspin3.5pl2/nmrdata nmrsu 33

7.7261  
7.7304  
7.7426  
7.7472

7.5998  
7.6143  
7.6269

7.5506  
7.5305  
7.5109

7.4448  
7.4476  
7.4653  
7.4682

7.2835

7.1897  
7.2020  
7.2104  
7.2209

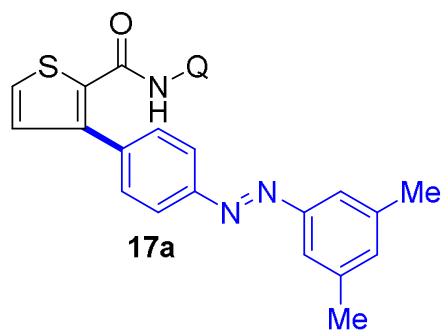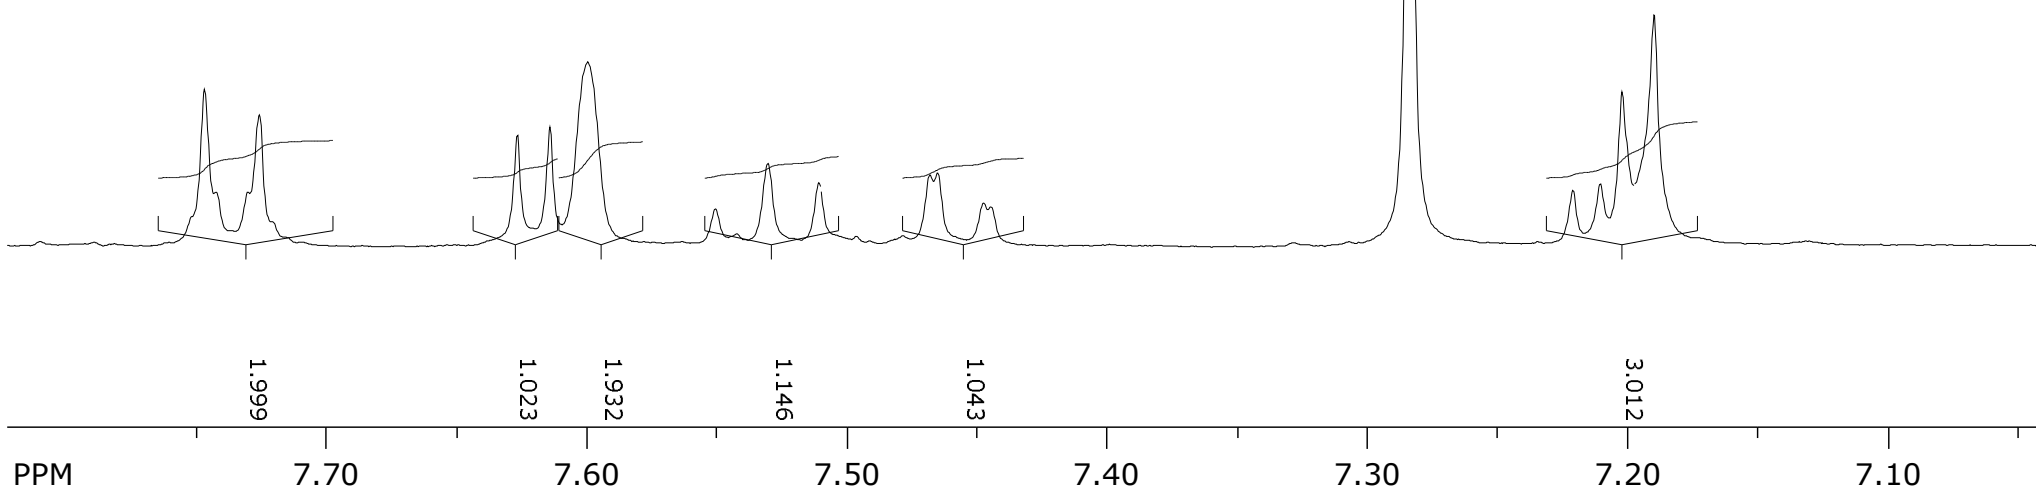

SpinWorks 4: SS-762 REP  
PROTON CDCl3 /opt/topspin3.5pl2/nmrdata nmrsu 33

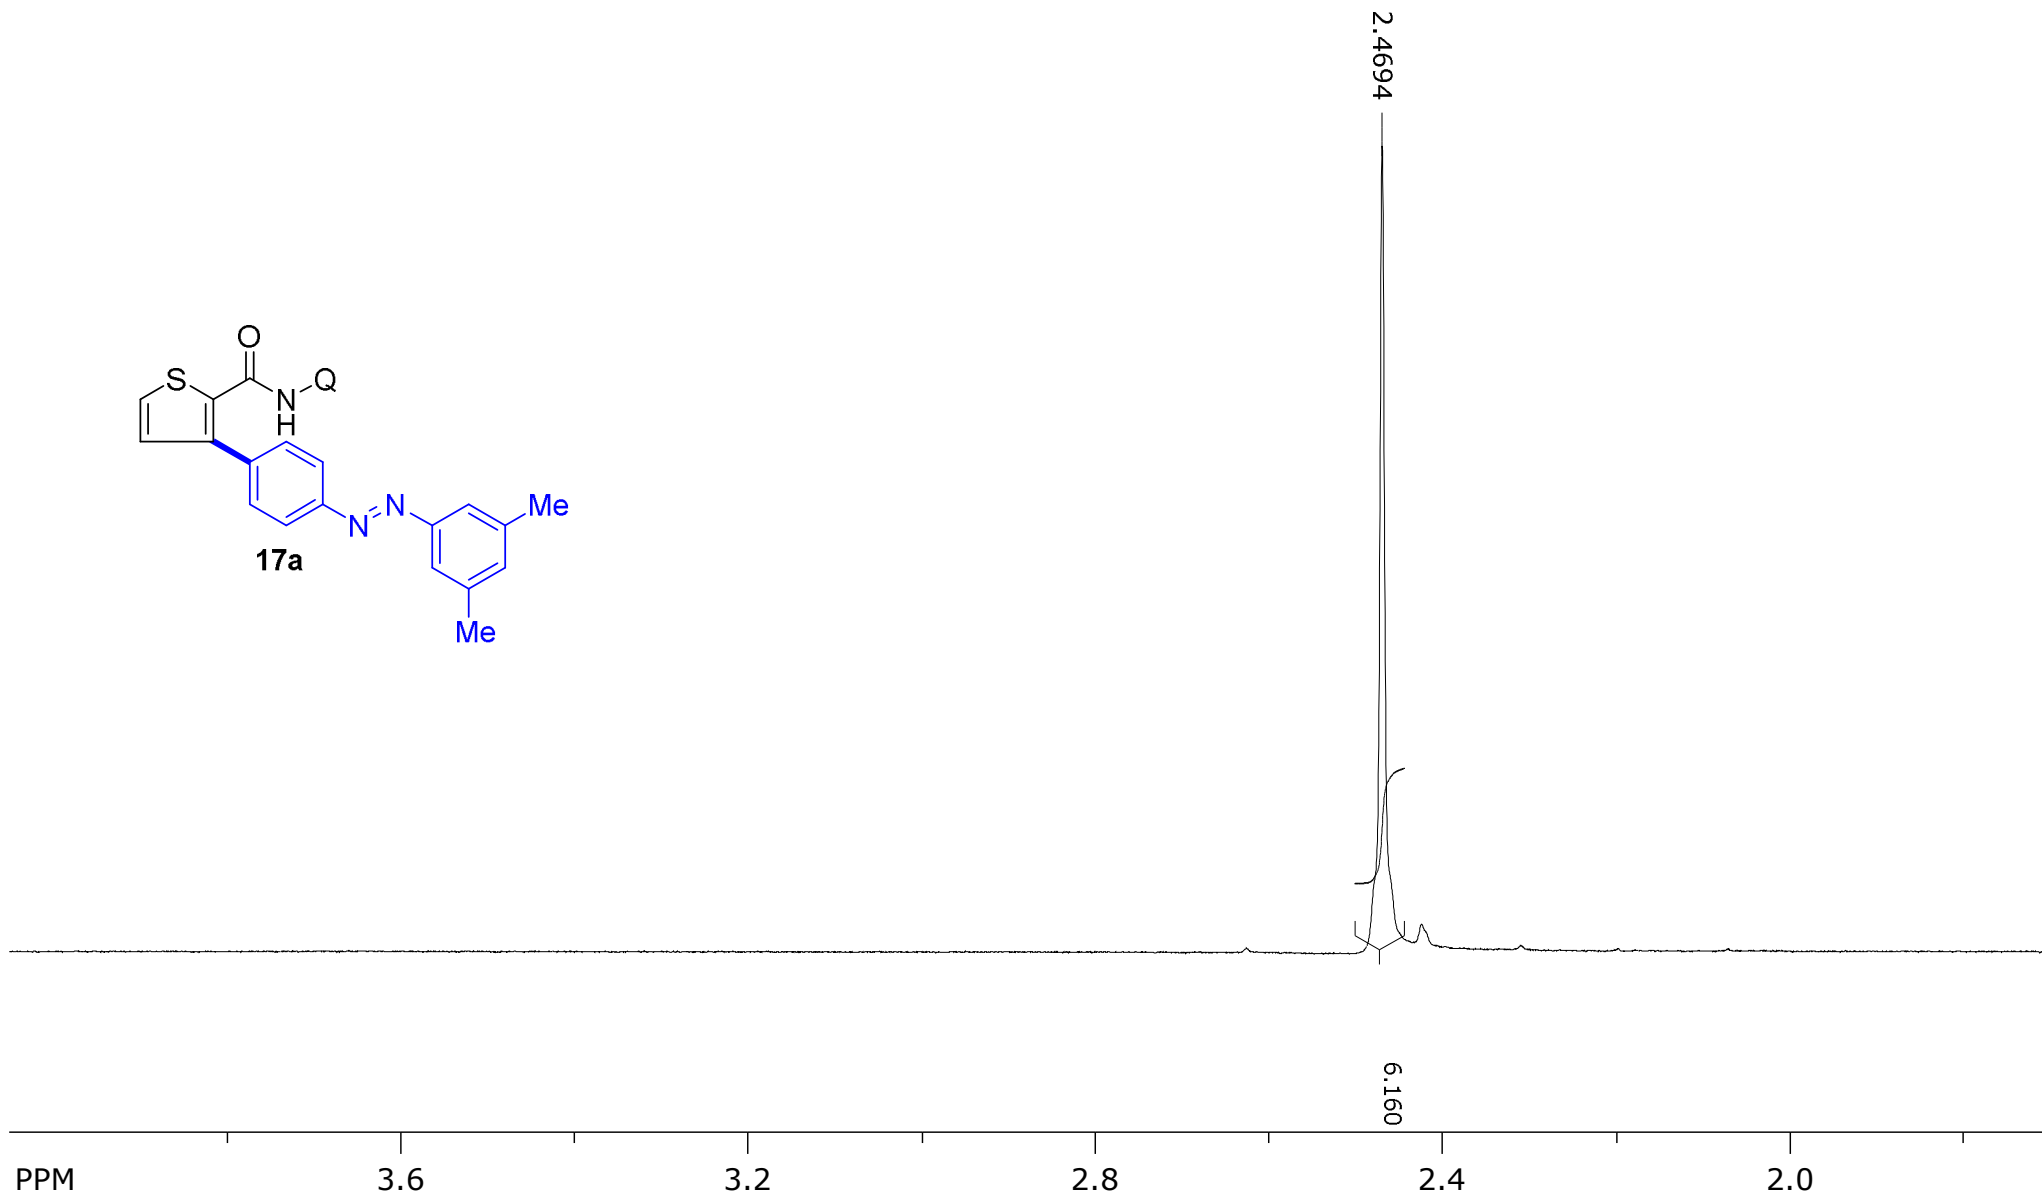

SpinWorks 4: SS-762

C13CPD256 CDCl3 /opt/topspin3.5pl2/nmrdata nmrsu 41

116.410  
120.741  
121.428  
121.614  
123.552  
127.264  
127.732  
129.614  
130.458  
131.998  
134.428  
135.818  
136.274  
137.676  
138.368  
138.917  
142.167  
147.744  
152.815  
160.448



76.722  
77.041  
77.357

21.331

PPM

160

120

80

40

0

185

SpinWorks 4: SS-762  
C13CPD256 CDCl3 /opt/topspin3.5pl2/nmrdata nmrsu 41

160.448 —  
152.815 —  
152.917 —  
147.744 —  
142.167 —  
138.917 —  
138.368 —  
137.676 —  
136.274 —  
135.818 —  
134.420 —  
132.998 —  
131.139 —  
130.458 —  
129.614 —  
127.732 —  
127.264 —  
123.552 —  
121.614 —  
121.428 —  
120.741 —  
116.410 —

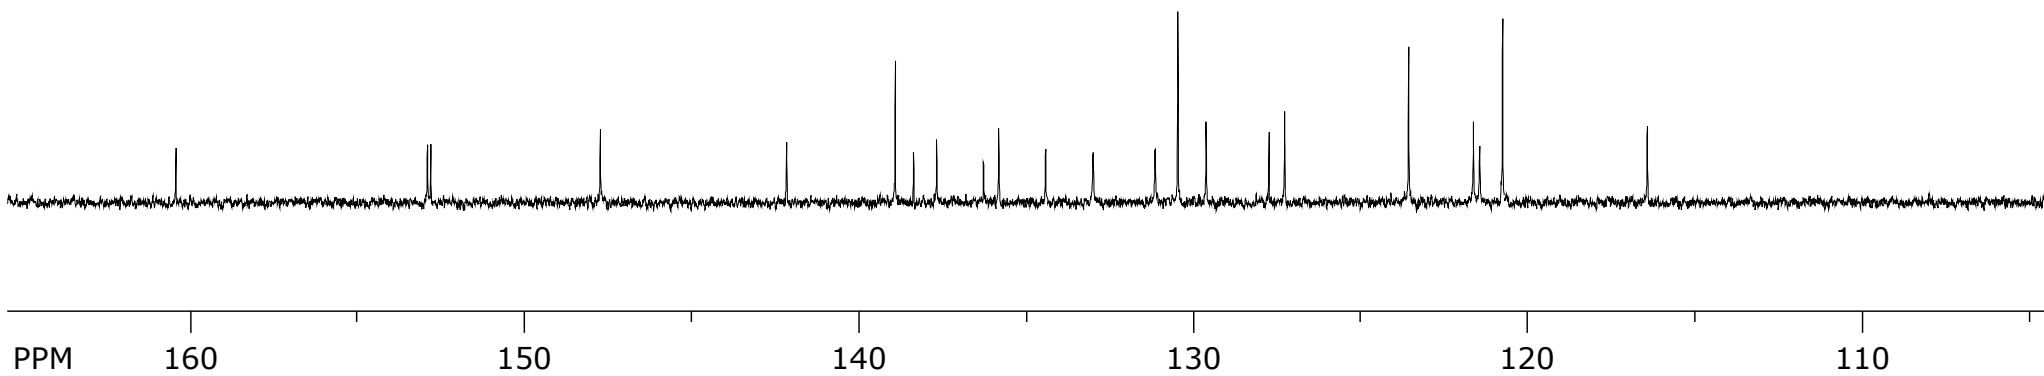



SpinWorks 4: SS-758  
PROTON CDCl3 /opt/topspin3.5pl2/nmrdata nmrsu 4

9.9353

8.8356  
8.8383  
8.8549  
8.8575

8.1621  
8.1662  
8.1726  
8.1766

7.9788  
7.9828  
7.9995  
8.0035

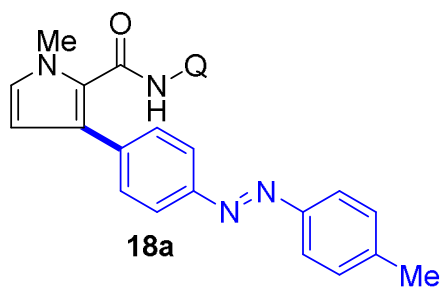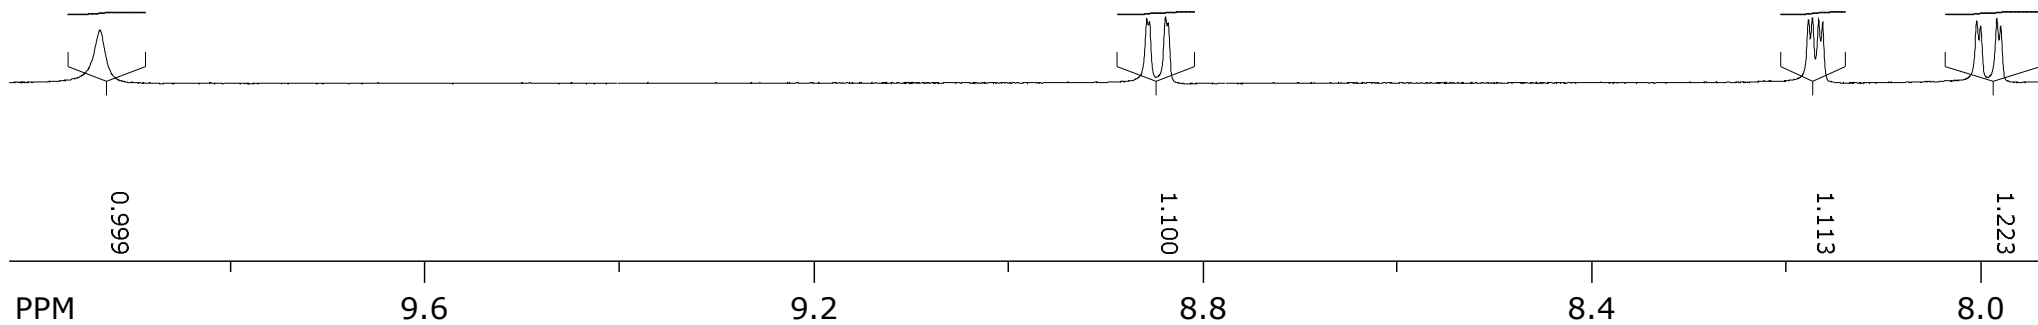



SpinWorks 4: SS-758  
PROTON CDCl3 /opt/topspin3.5pl2/nmrdata nmrsu 4

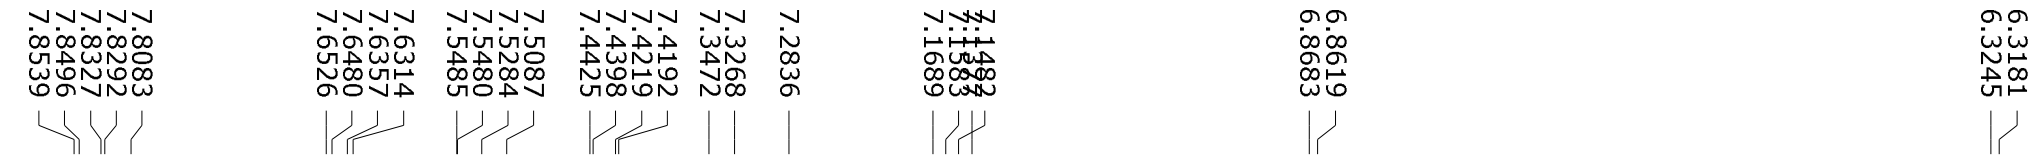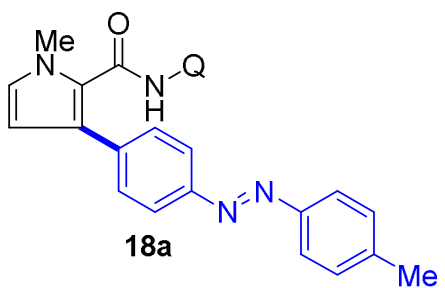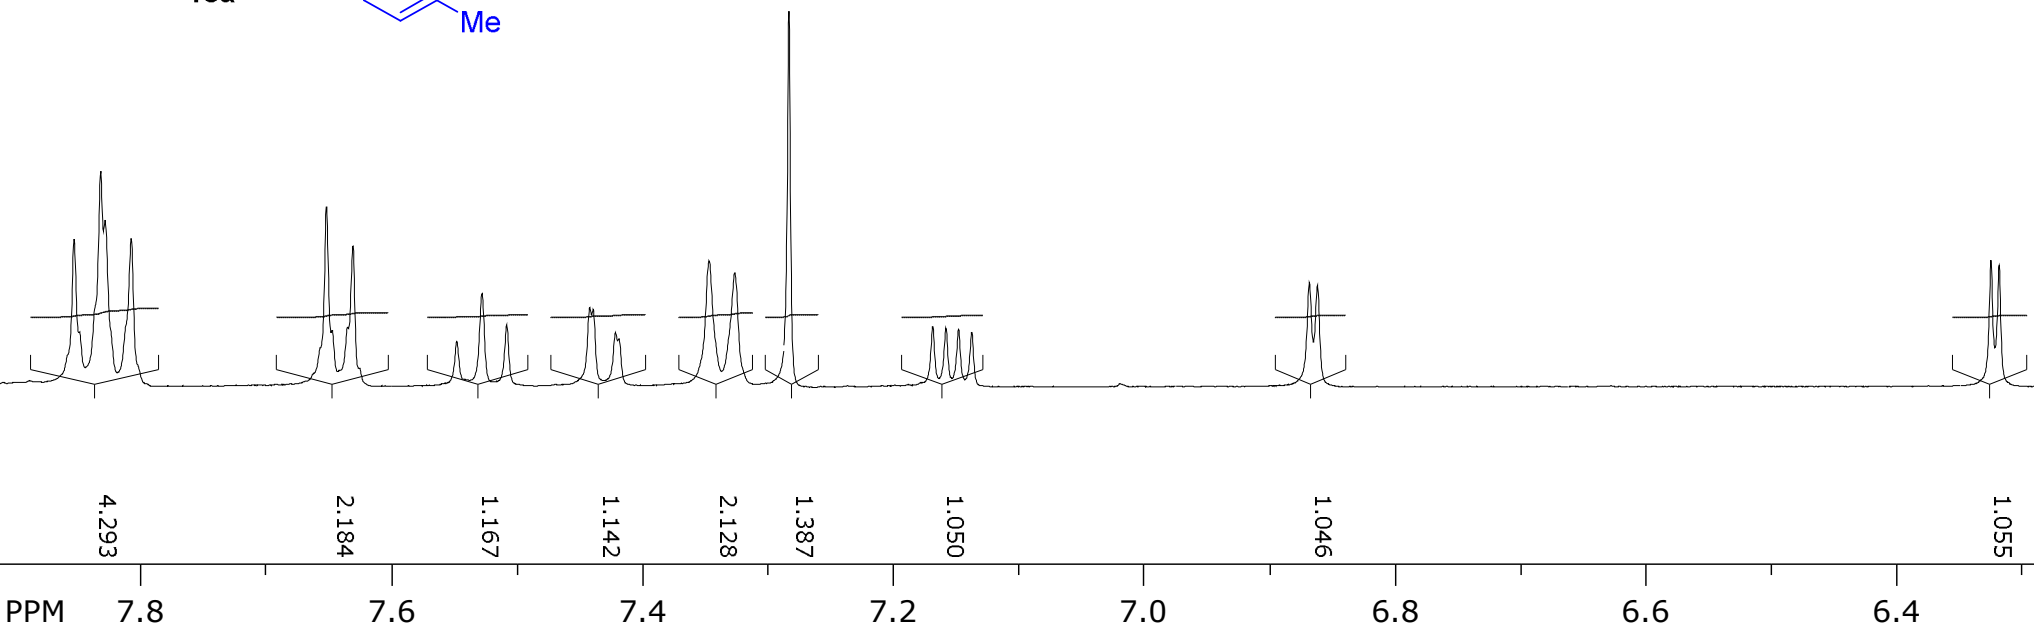

SpinWorks 4: SS-758  
PROTON CDCl3 /opt/topspin3.5pl2/nmrdata nmrsu 4

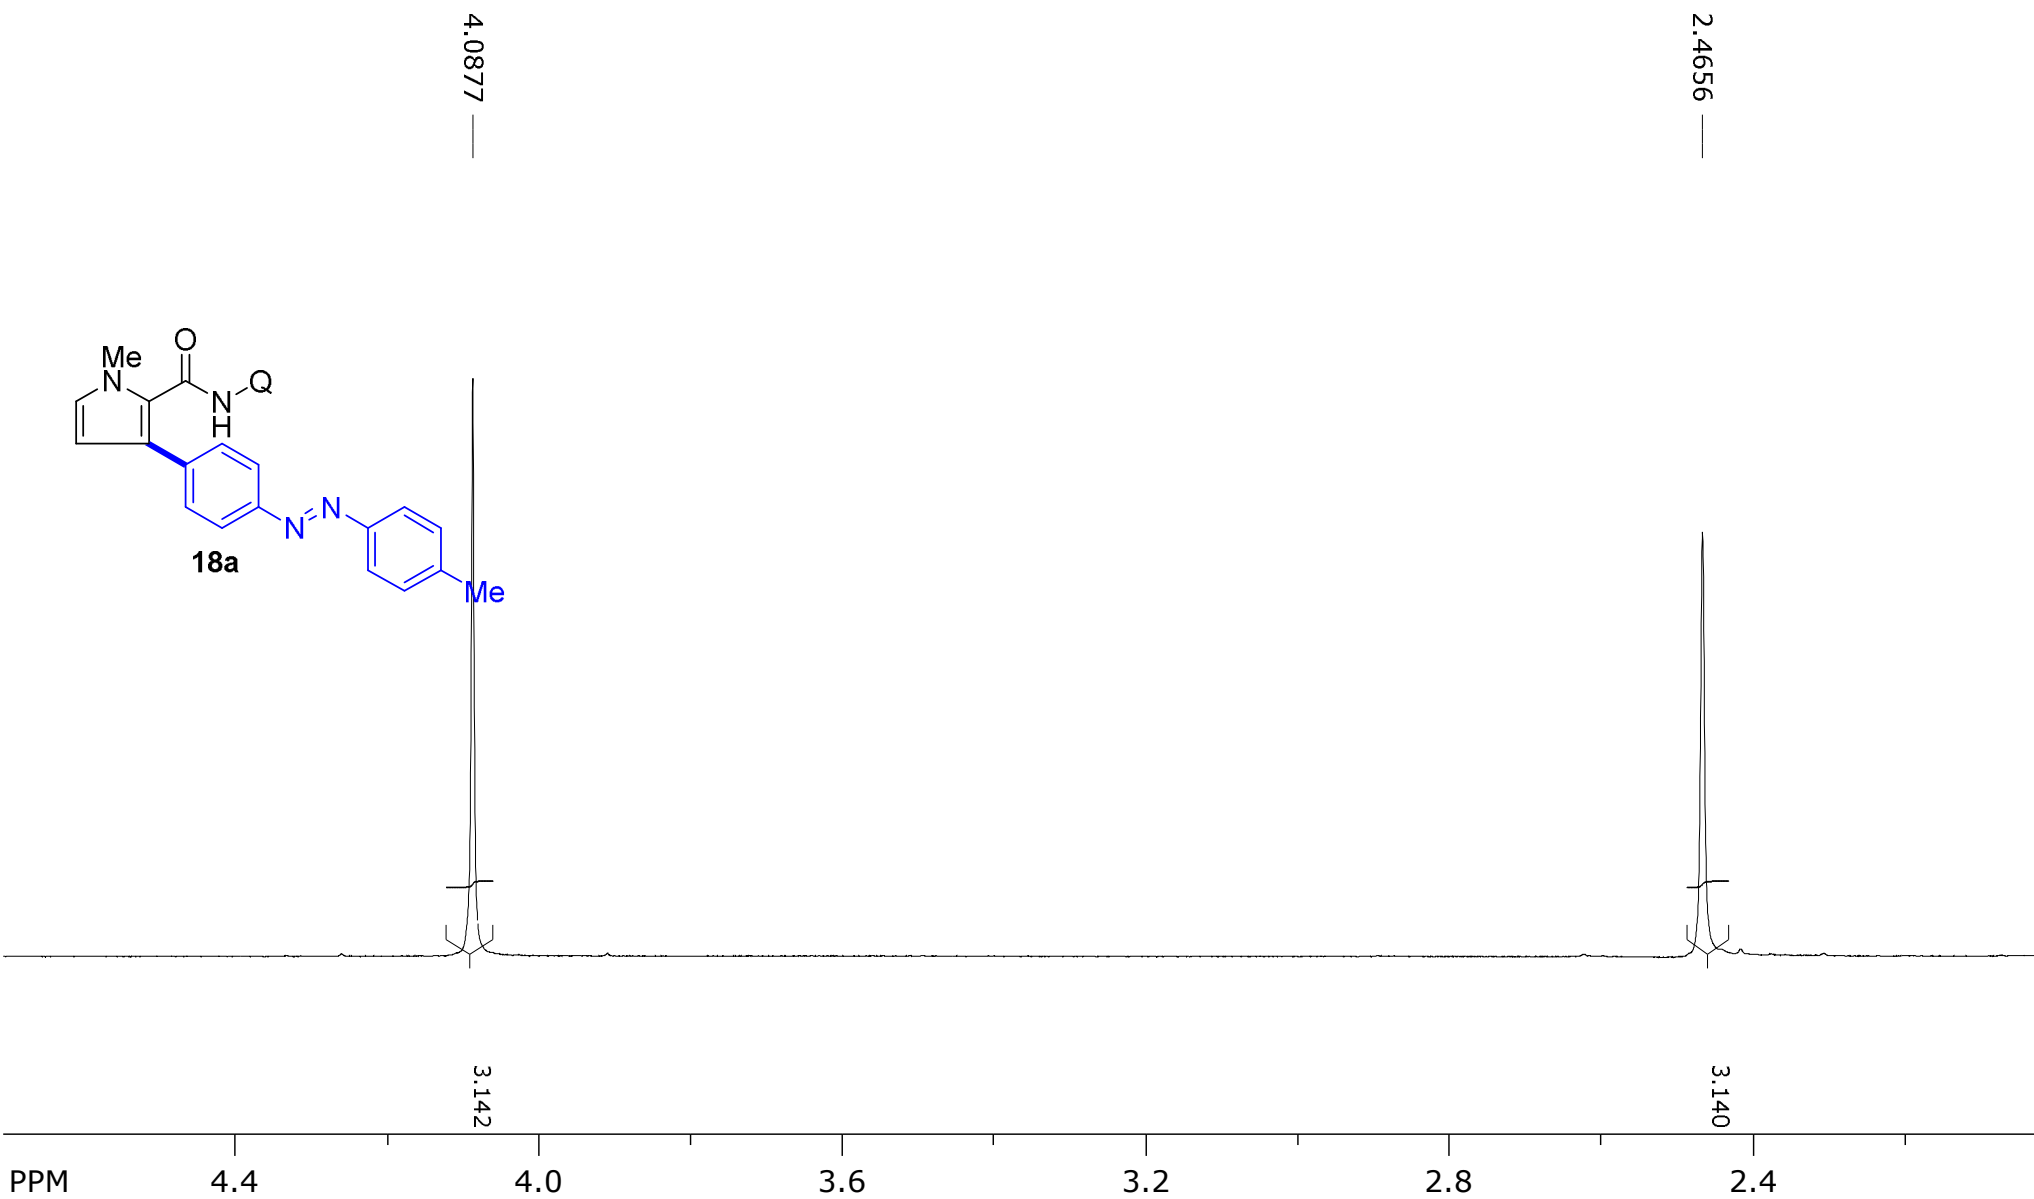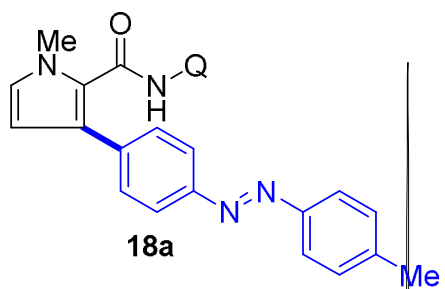

SpinWorks 4: SS758  
C13CPD256 CDCl3 /opt/topspin3.5pl2/nmrdata nmrsu 40

109.430  
115.688  
121.128  
121.282  
122.789  
123.101  
123.801  
127.143  
137.281  
137.281  
128.682  
129.766  
130.450  
134.900  
135.705  
138.339  
138.375  
141.452  
147.650  
150.877  
151.910  
160.345

76.735  
77.052  
77.370

37.259

21.491

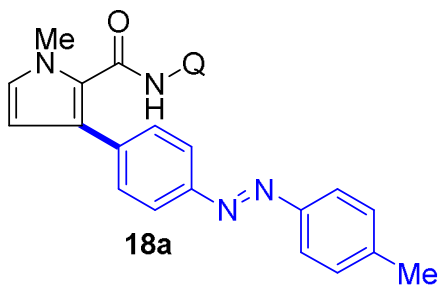

PPM

160

120

80

40

0

SpinWorks 4: SS758  
C13CPD256 CDCl3 /opt/topspin3.5pl2/nmrdata nmrsu 40

160.345

150.877  
151.910

147.650

141.452

138.339  
138.375

134.900  
135.705

127.143  
127.291  
127.795  
128.682  
129.766  
130.450

123.801  
121.128  
121.282  
122.789  
123.101

115.688

109.430

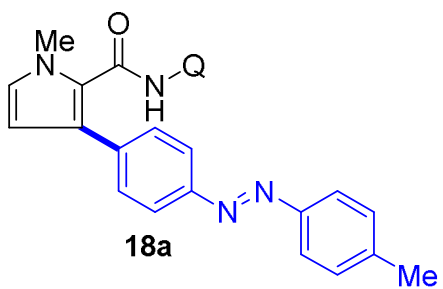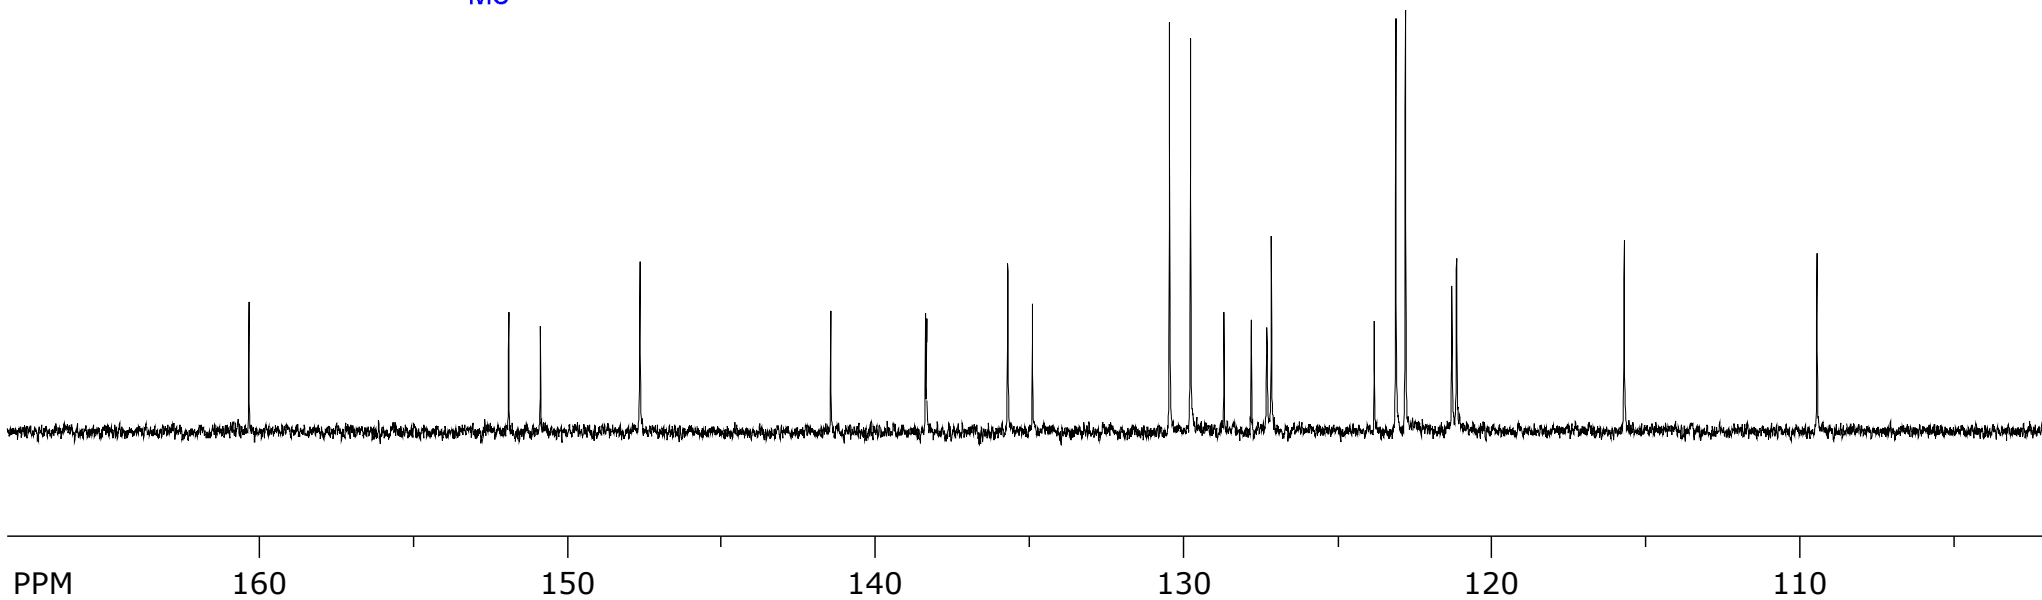



9.8551

8.8351  
8.8376  
8.8542  
8.8566

8.4057  
8.4096  
8.4161  
8.4200

8.1986  
8.2024  
8.2064

8.0256  
8.0292  
8.0463  
8.0499

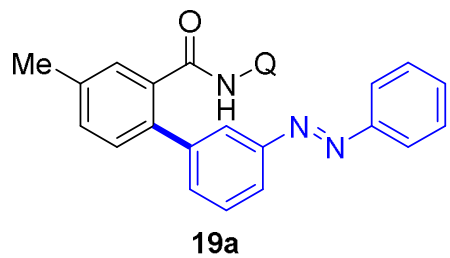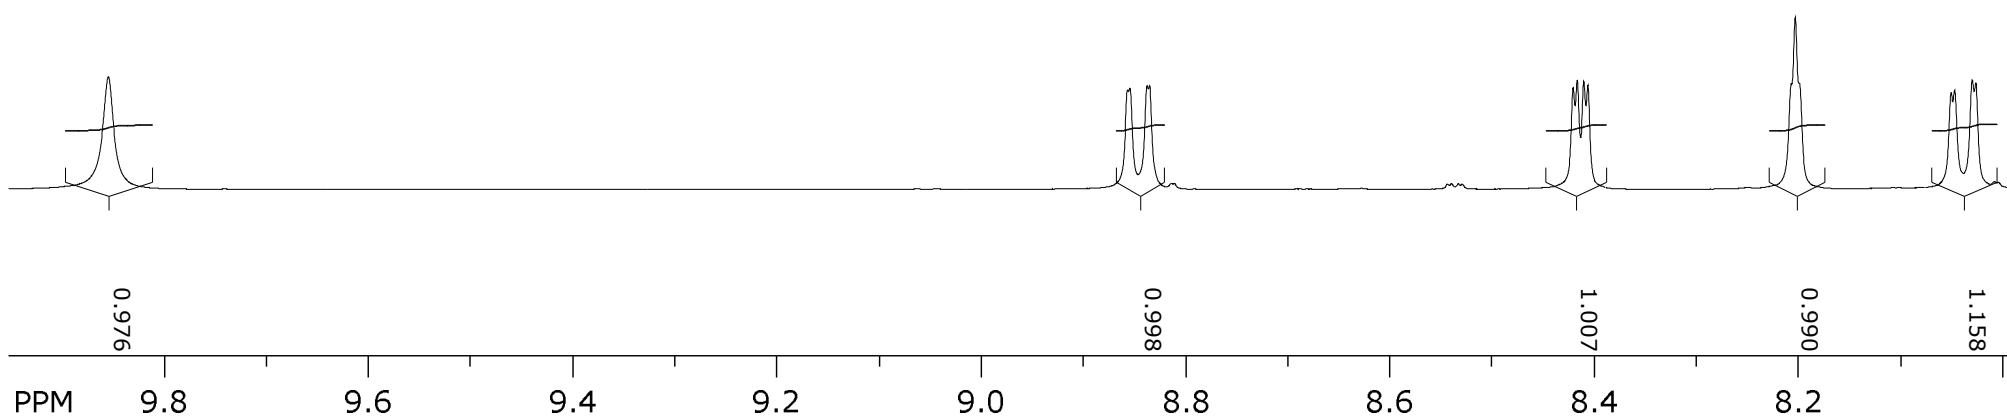

7.8984  
7.9015  
7.9182  
7.9223

7.8160

7.7343  
7.7545

7.5985  
7.5793  
7.5638  
7.5584  
7.5539  
7.5422  
7.5361  
7.5232  
7.5158  
7.5117  
7.4967  
7.4909

7.4481  
7.4278

7.3692  
7.3497  
7.3303

7.2624  
7.2730  
7.2838  
7.2936

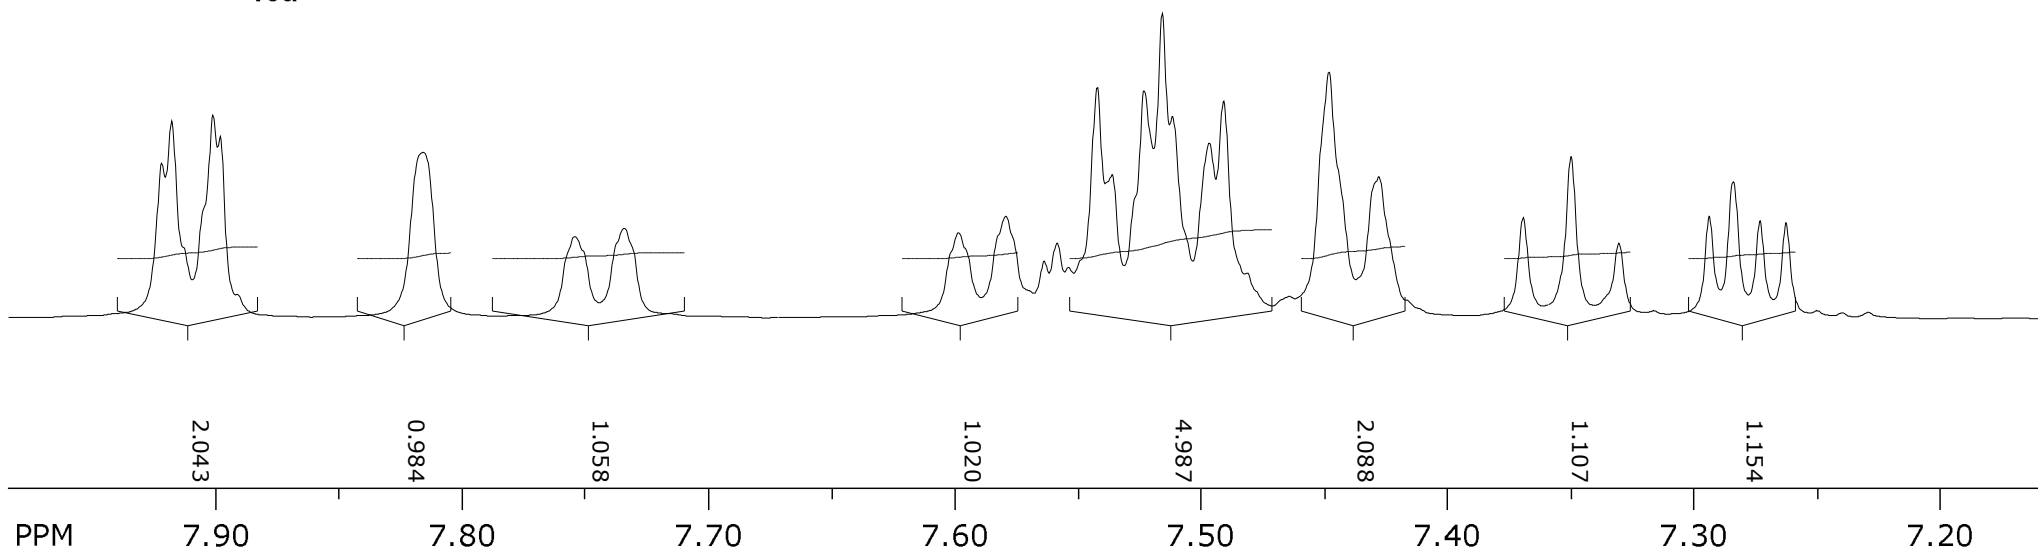





SpinWorks 4: SS 243 P  
C13CPD CDCl3 /opt/topspin3.5pl2/nmrdata nmrsu 51

167.751

152.616  
152.905

147.864

141.116

138.069  
138.398

136.659

135.966  
134.490

131.767  
131.487

131.088  
130.662

129.961  
129.131

129.012  
127.698

127.260

123.149  
122.899

121.567  
121.429

116.297

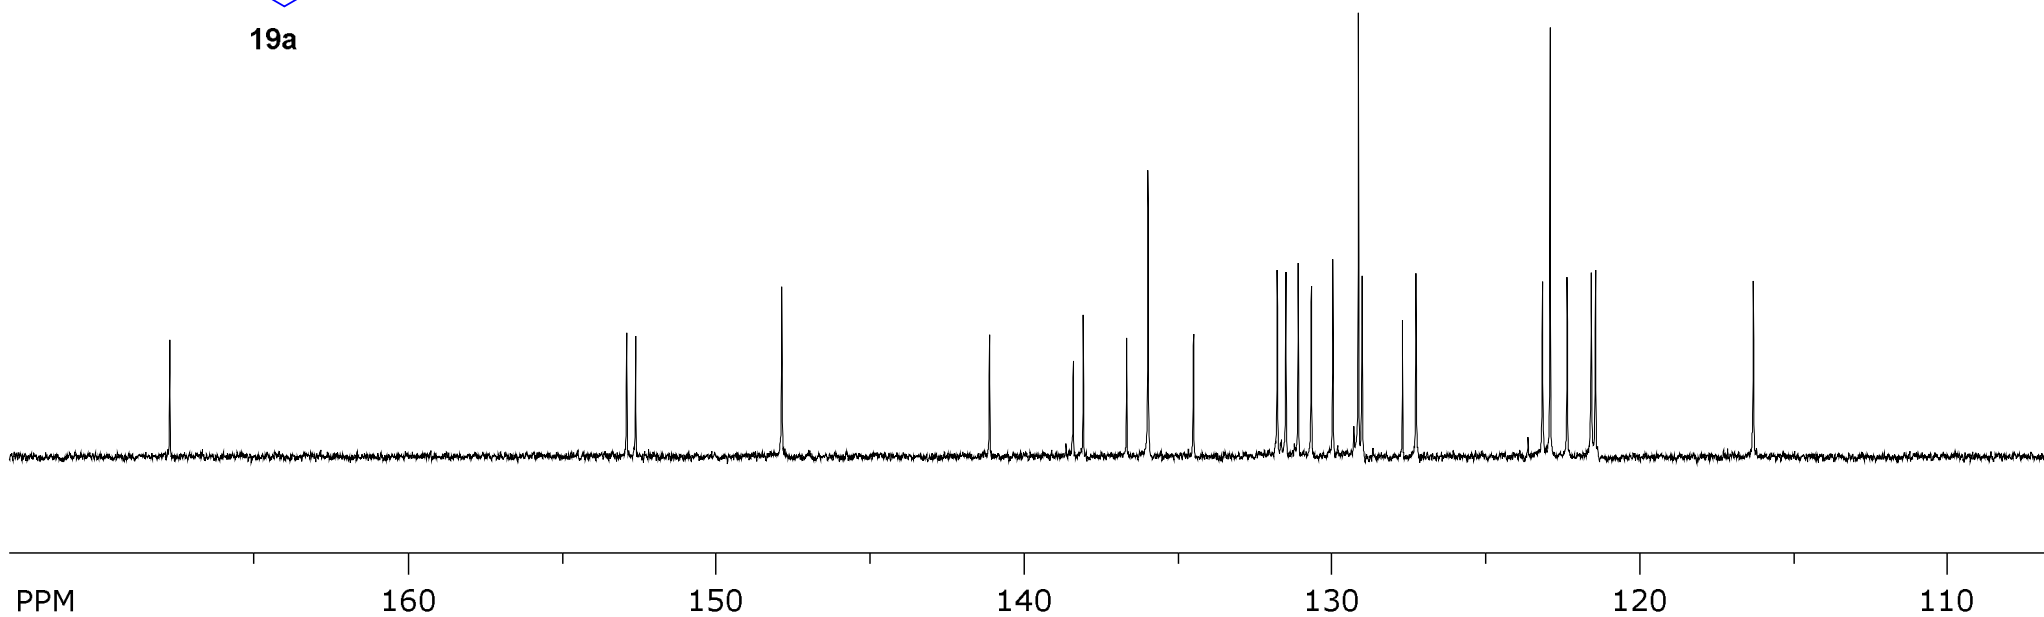

SpinWorks 4: SS 64 PSPLIT  
PROTON CDCl3 /opt/topspin3.5pl2/nmrdata nmrsu 1

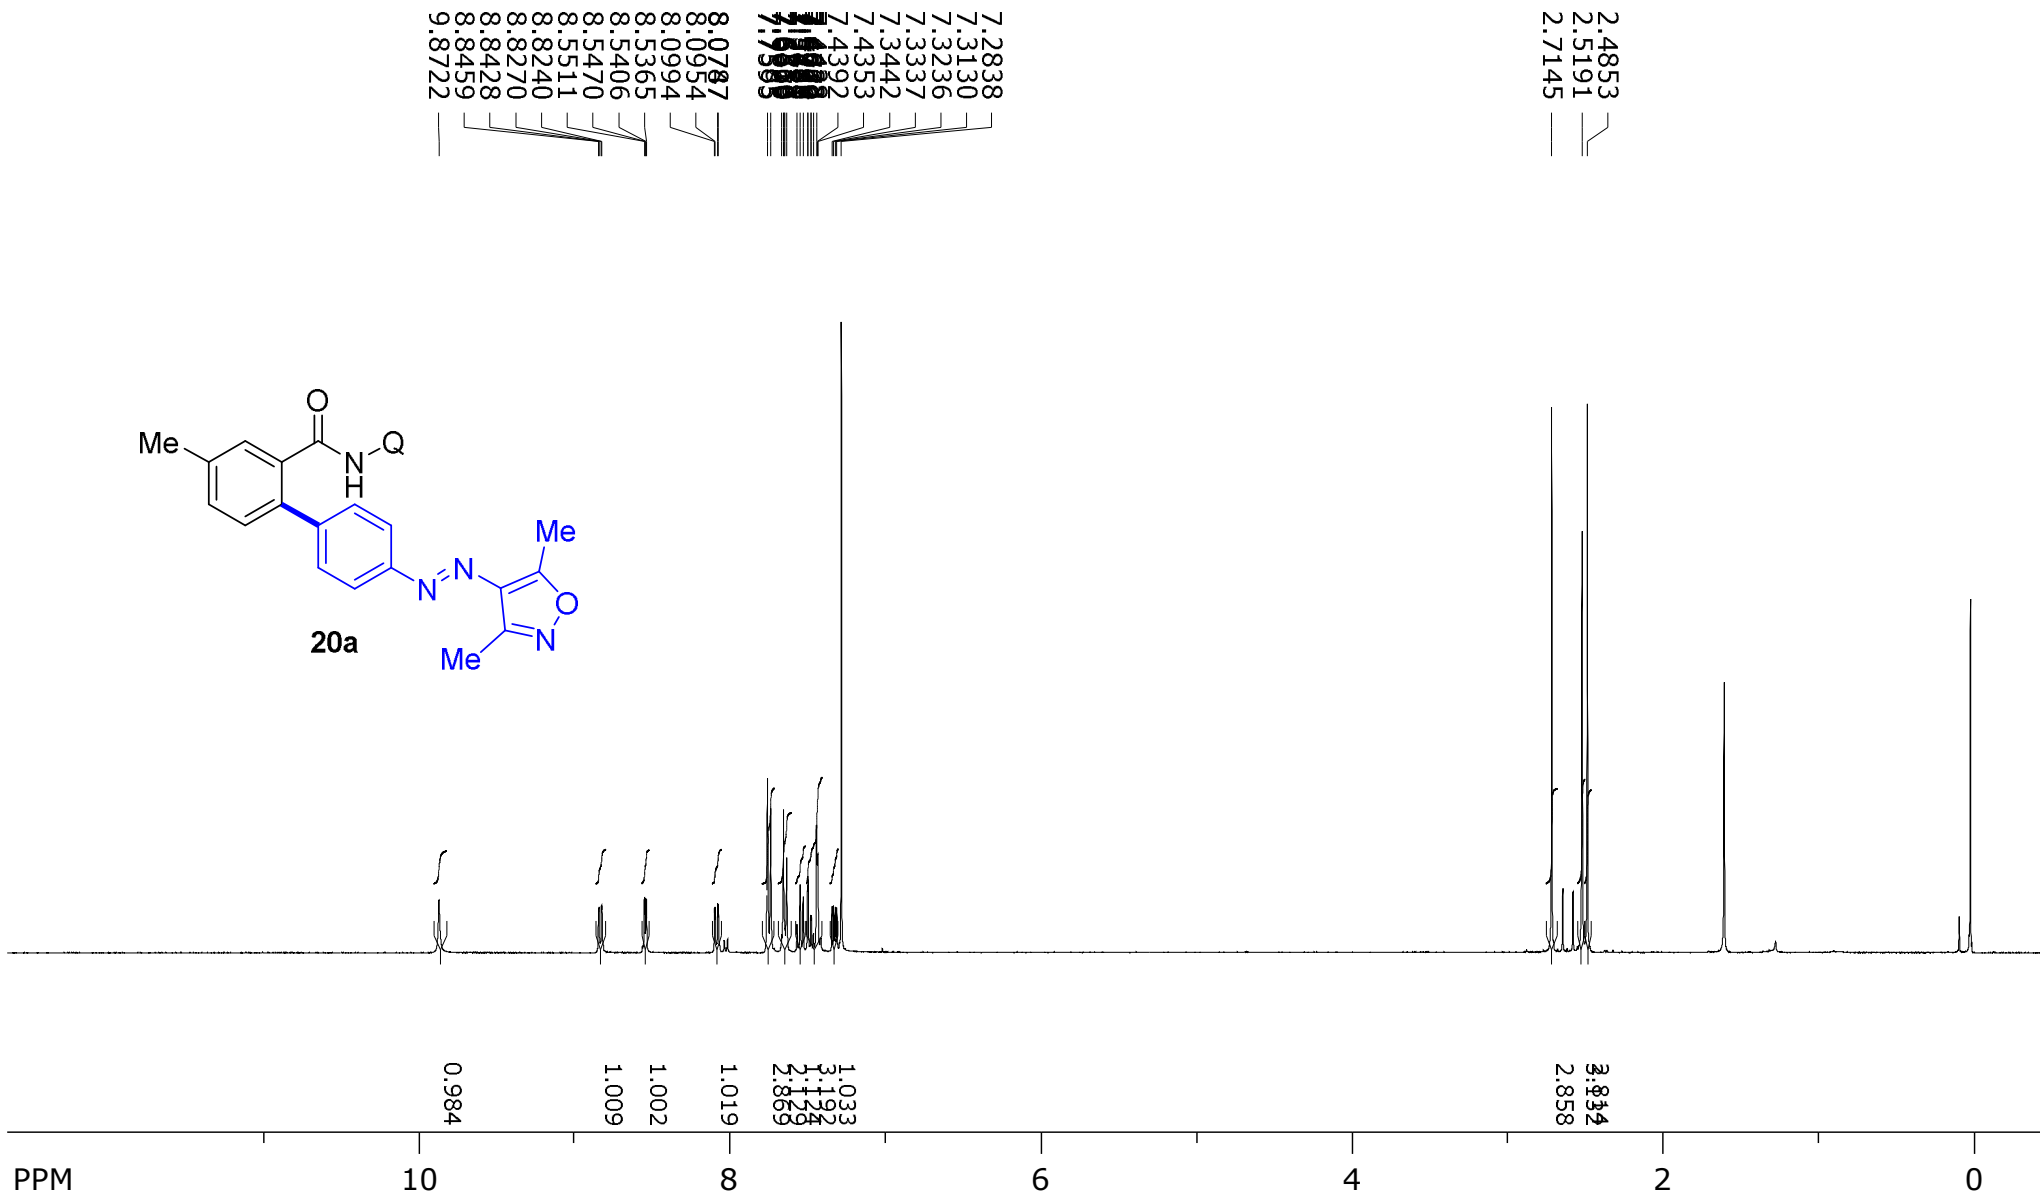

SpinWorks 4: SS 64 PSPLIT  
PROTON CDCl3 /opt/topspin3.5pl2/nmrdata nmrsu 1

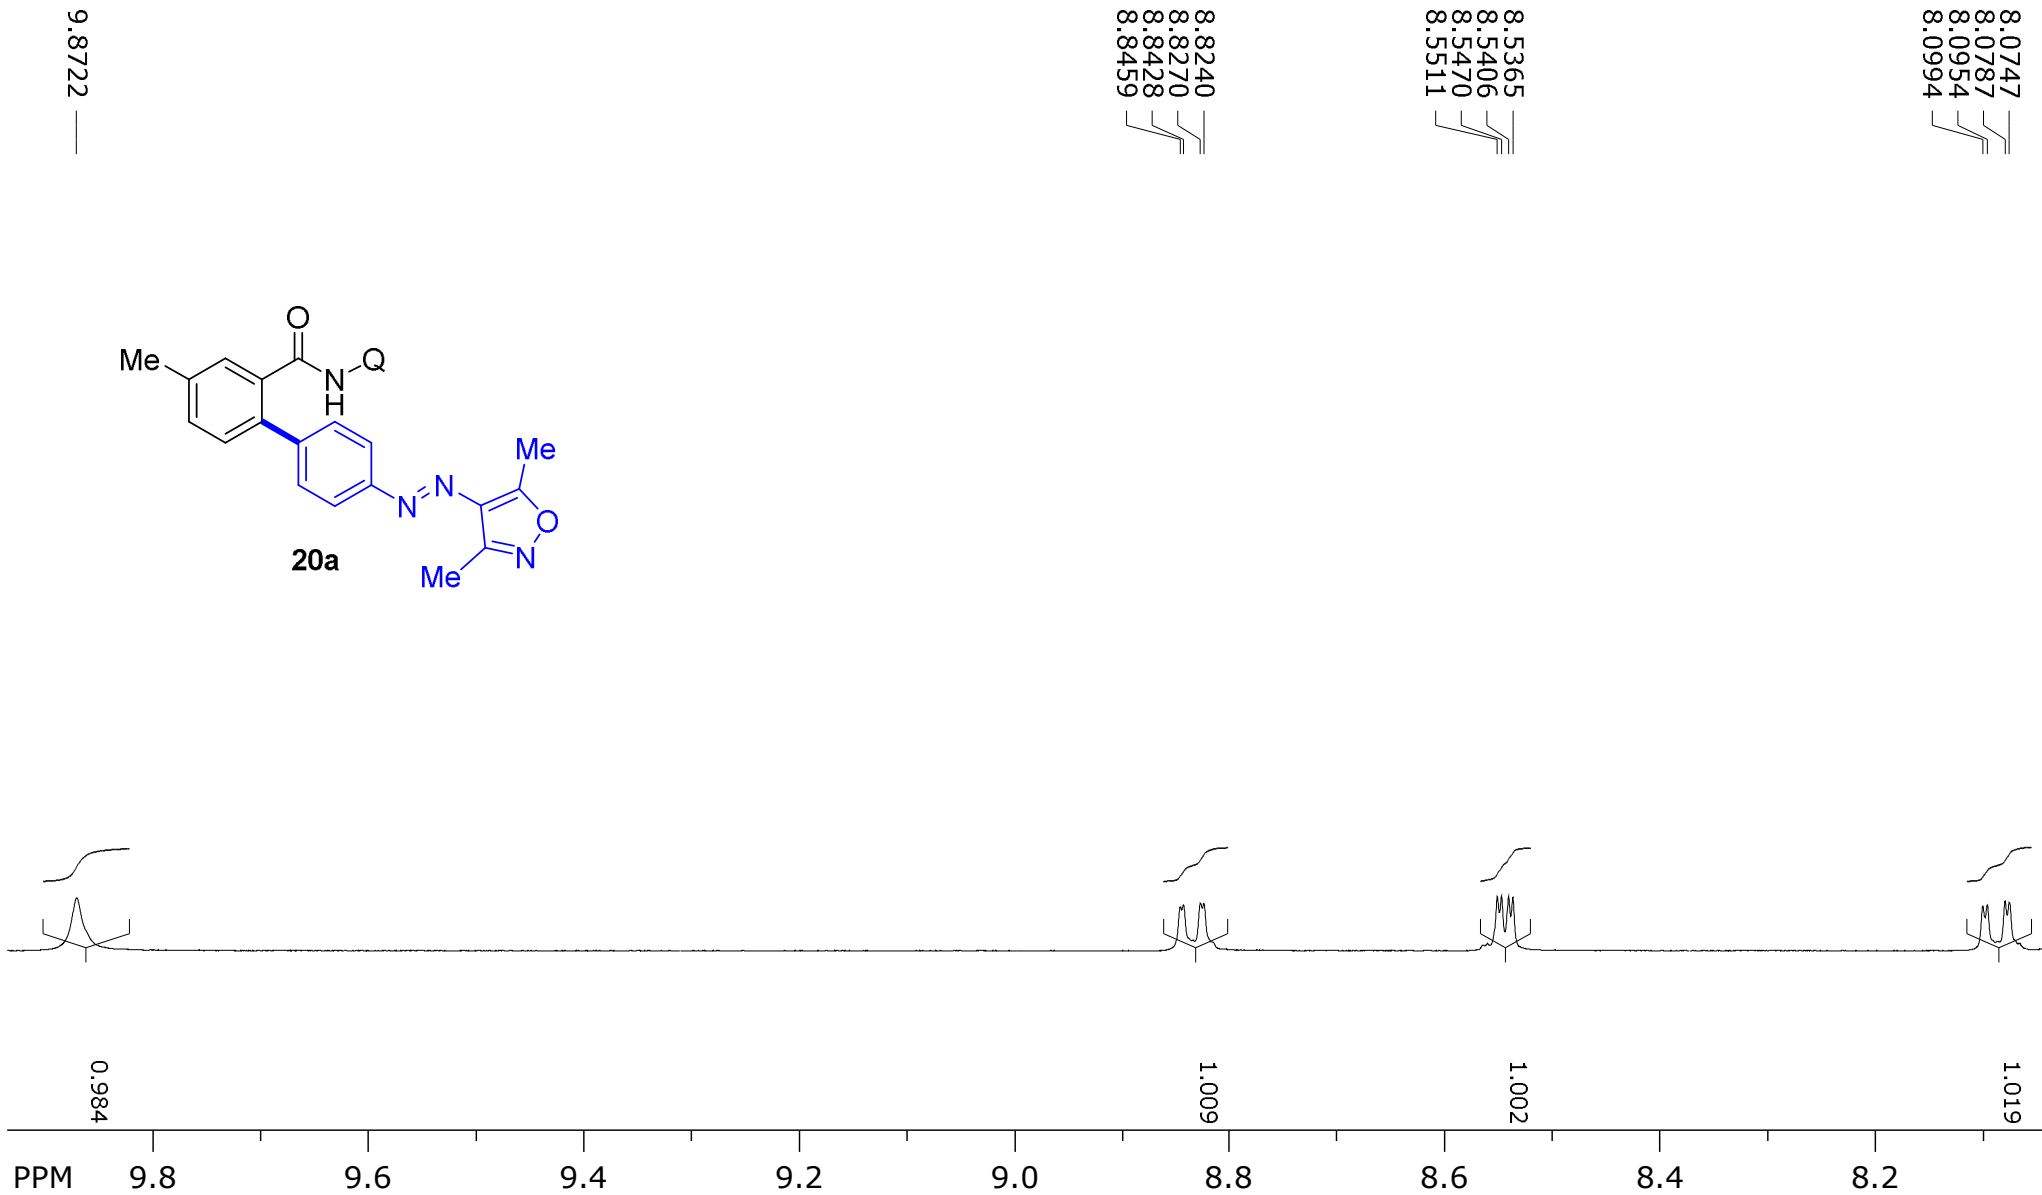

SpinWorks 4: SS 64 PSPLIT  
PROTON CDCl3 /opt/topspin3.5pl2/nmrdata nmrsu 1

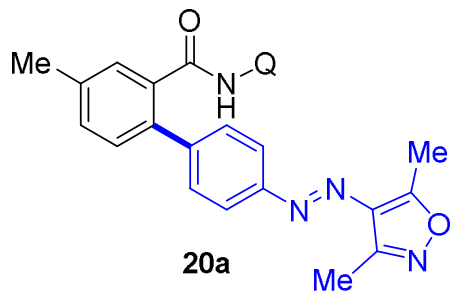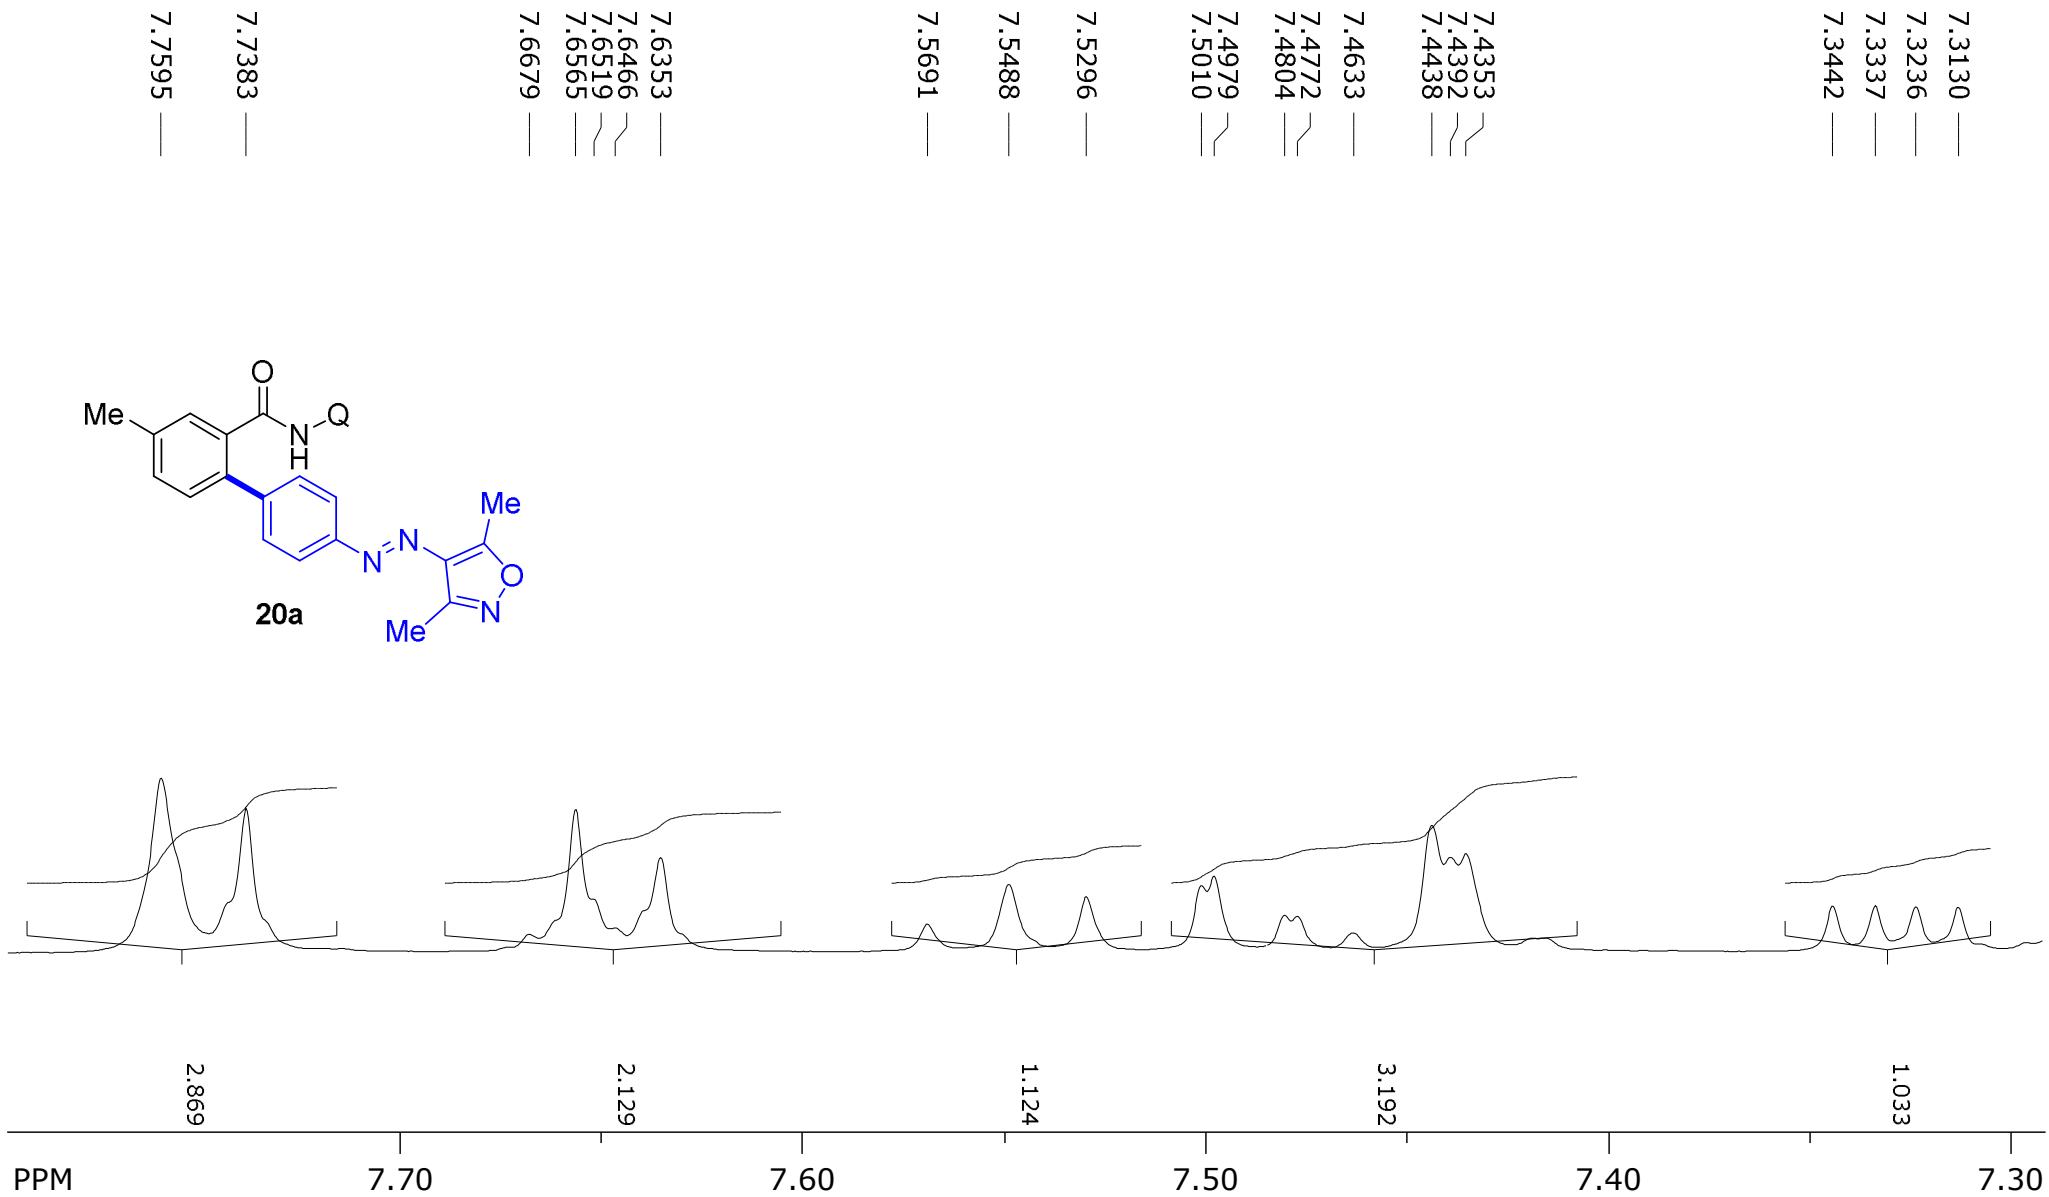

SpinWorks 4: SS 64 PSPLIT  
PROTON CDCl3 /opt/topspin3.5pl2/nmrdata nmrsu 1

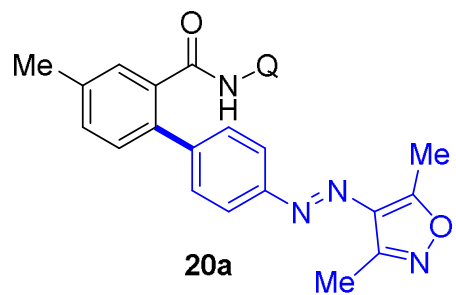

20a

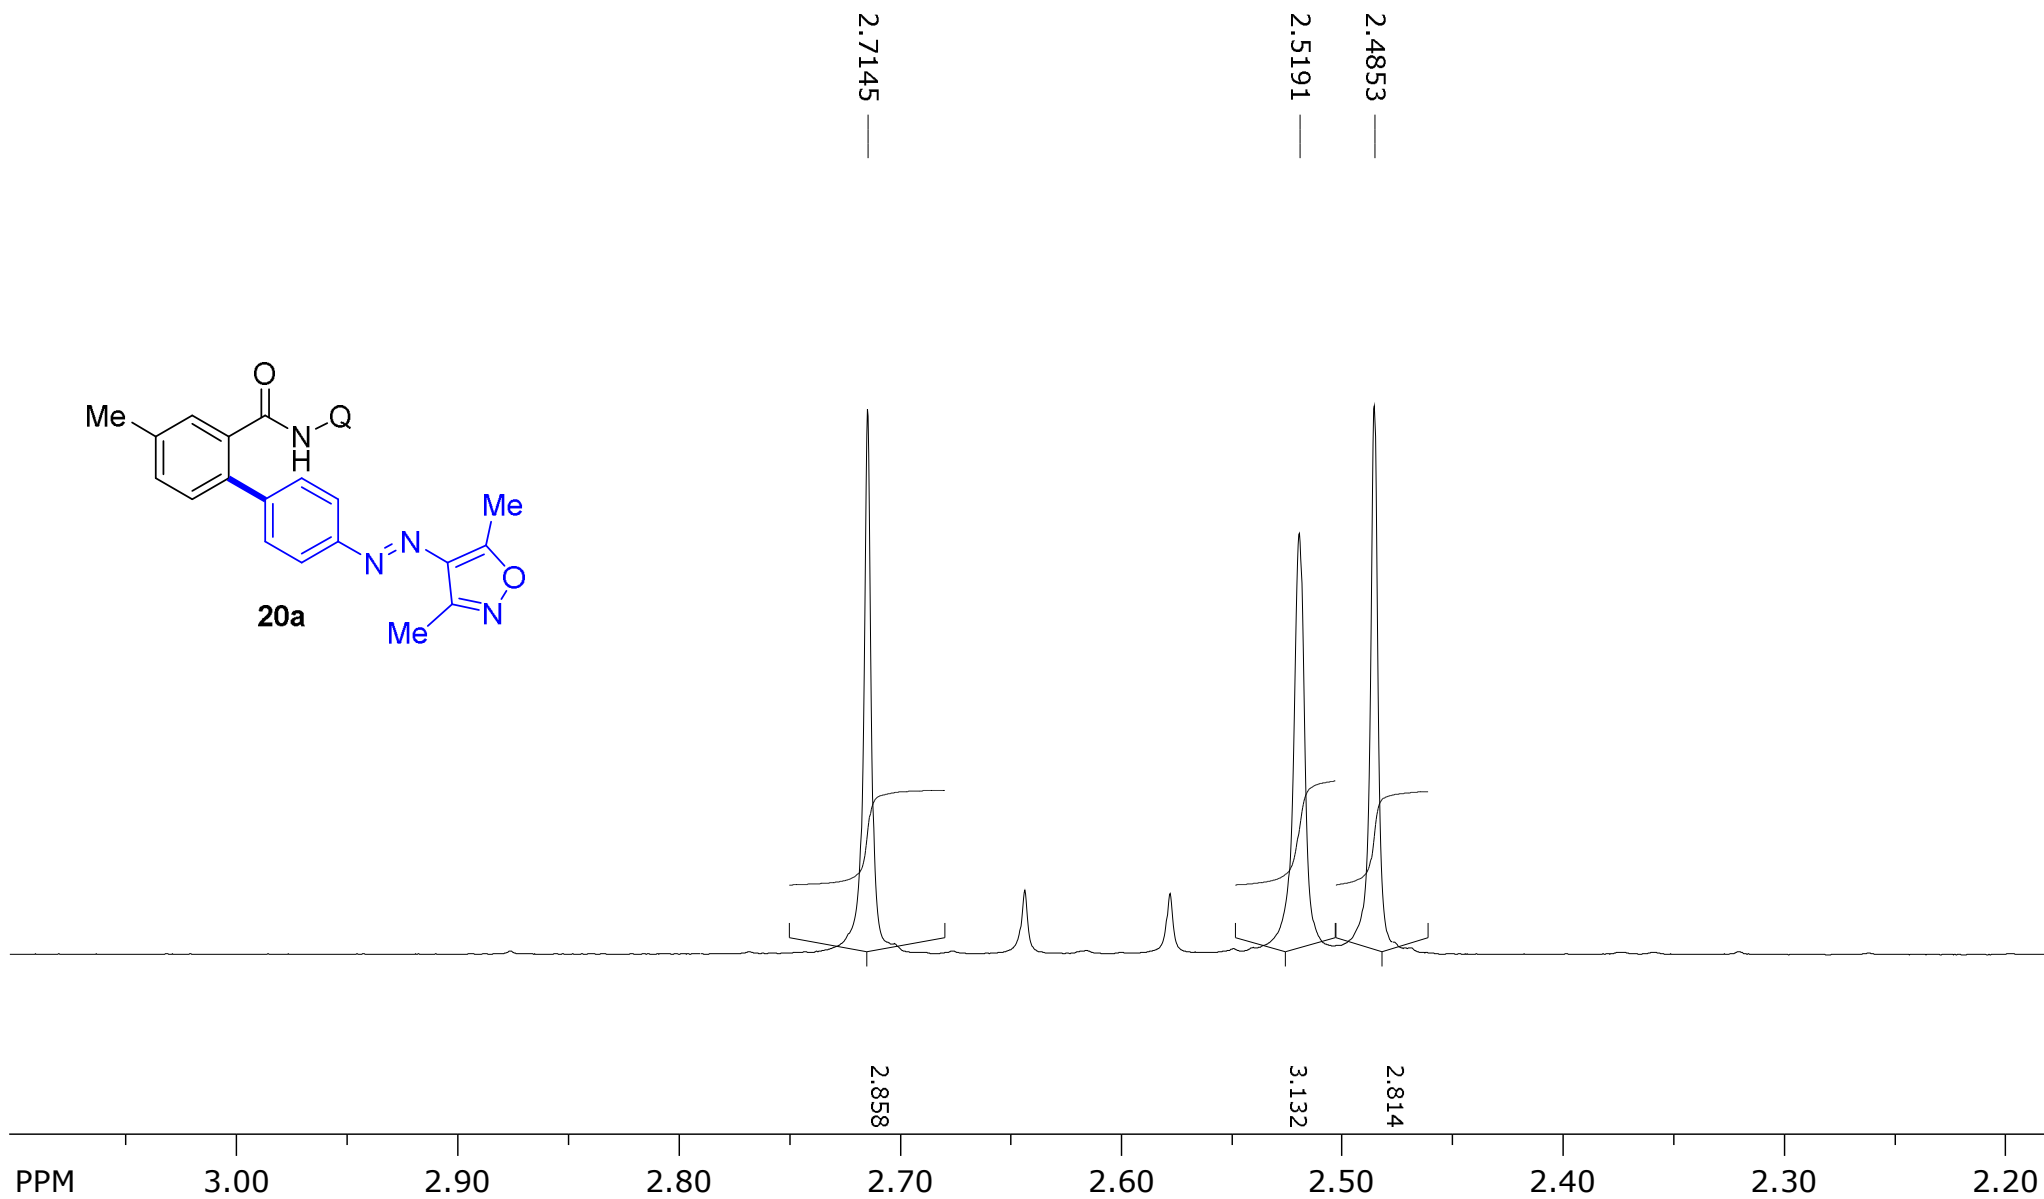

SpinWorks 4: SS 64 P TRANS 3  
C13CPD CDCl3 /opt/topspin3.5pl2/nmrdata nmrsu 1

116.450  
121.400  
121.663  
122.355  
127.311  
127.775  
129.744  
129.797  
131.230  
131.230  
134.517  
136.017  
136.076  
136.533  
138.192  
138.445  
142.589  
147.869  
152.074  
153.700  
167.829  
169.289

76.742  
77.061  
77.378

21.151  
11.666  
12.102

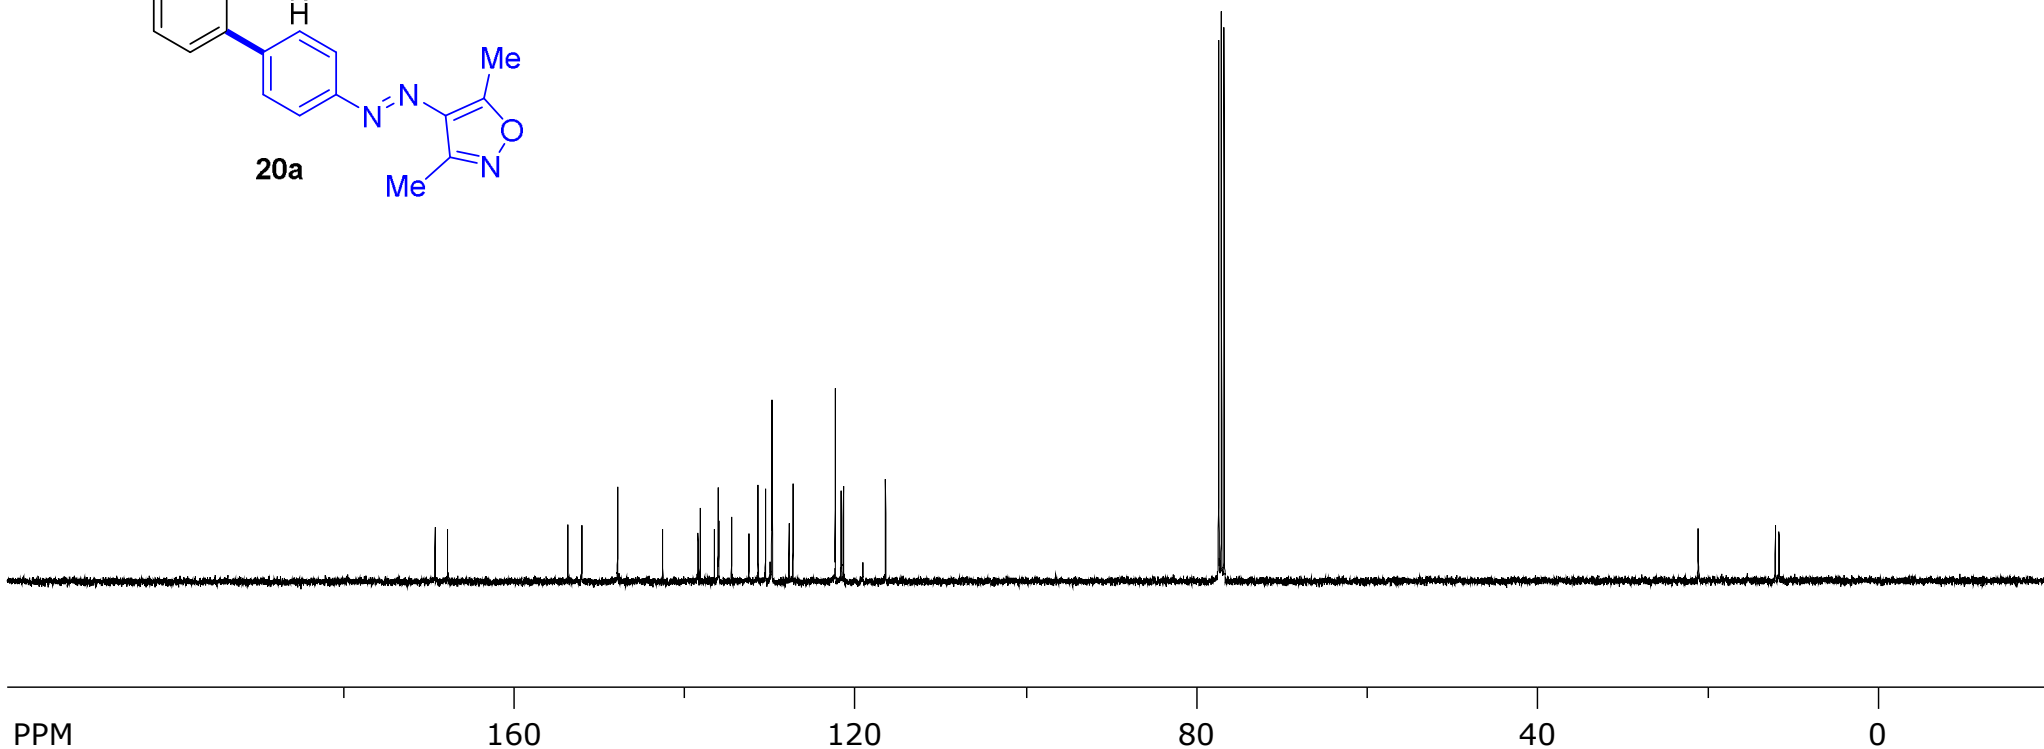

PPM

160

120

80

40

0

SpinWorks 4: SS 64 P TRANS 3  
C13CPD CDCl3 /opt/topspin3.5pl2/nmrdata nmrsu 1

167,829 —  
169,289 —  
152,074 —  
153,700 —  
147,869 —  
142,589 —  
138,445 —  
136,533 —  
136,076 —  
136,017 —  
134,517 —  
132,490 —  
131,410 —  
130,534 —  
129,797 —  
129,744 —  
127,775 —  
127,311 —  
122,355 —  
121,663 —  
121,400 —  
116,450 —

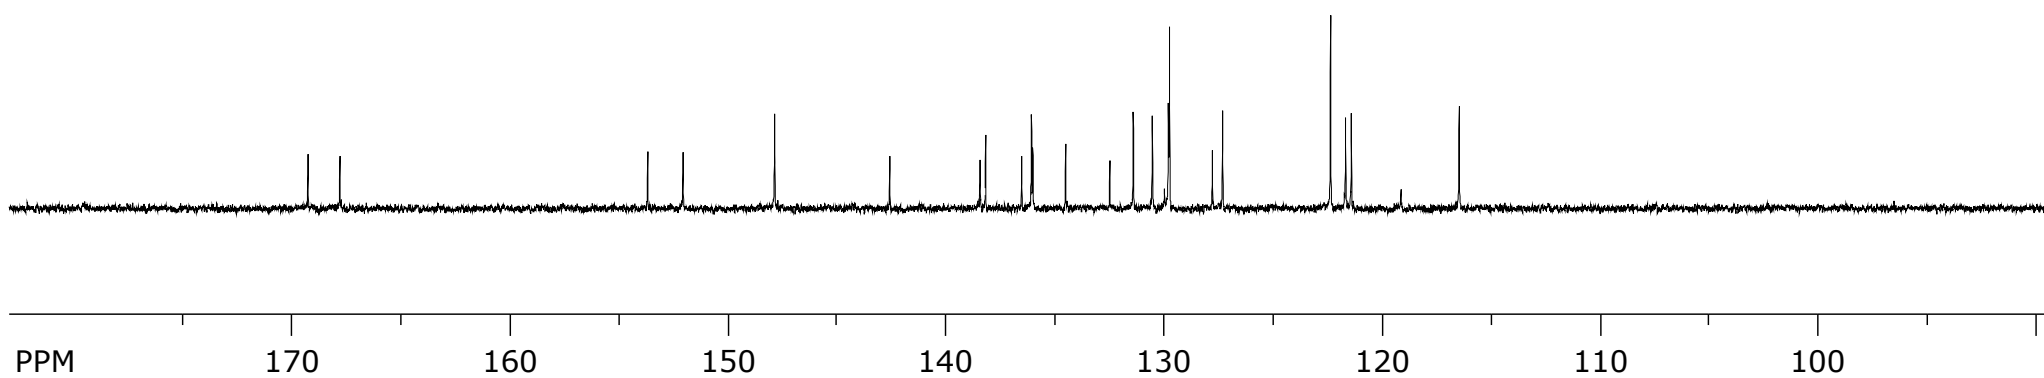

SpinWorks 4: SS-749-REP  
PROTON CDCl3 /opt/topspin3.5pl2/nmrdata nmrsu 31

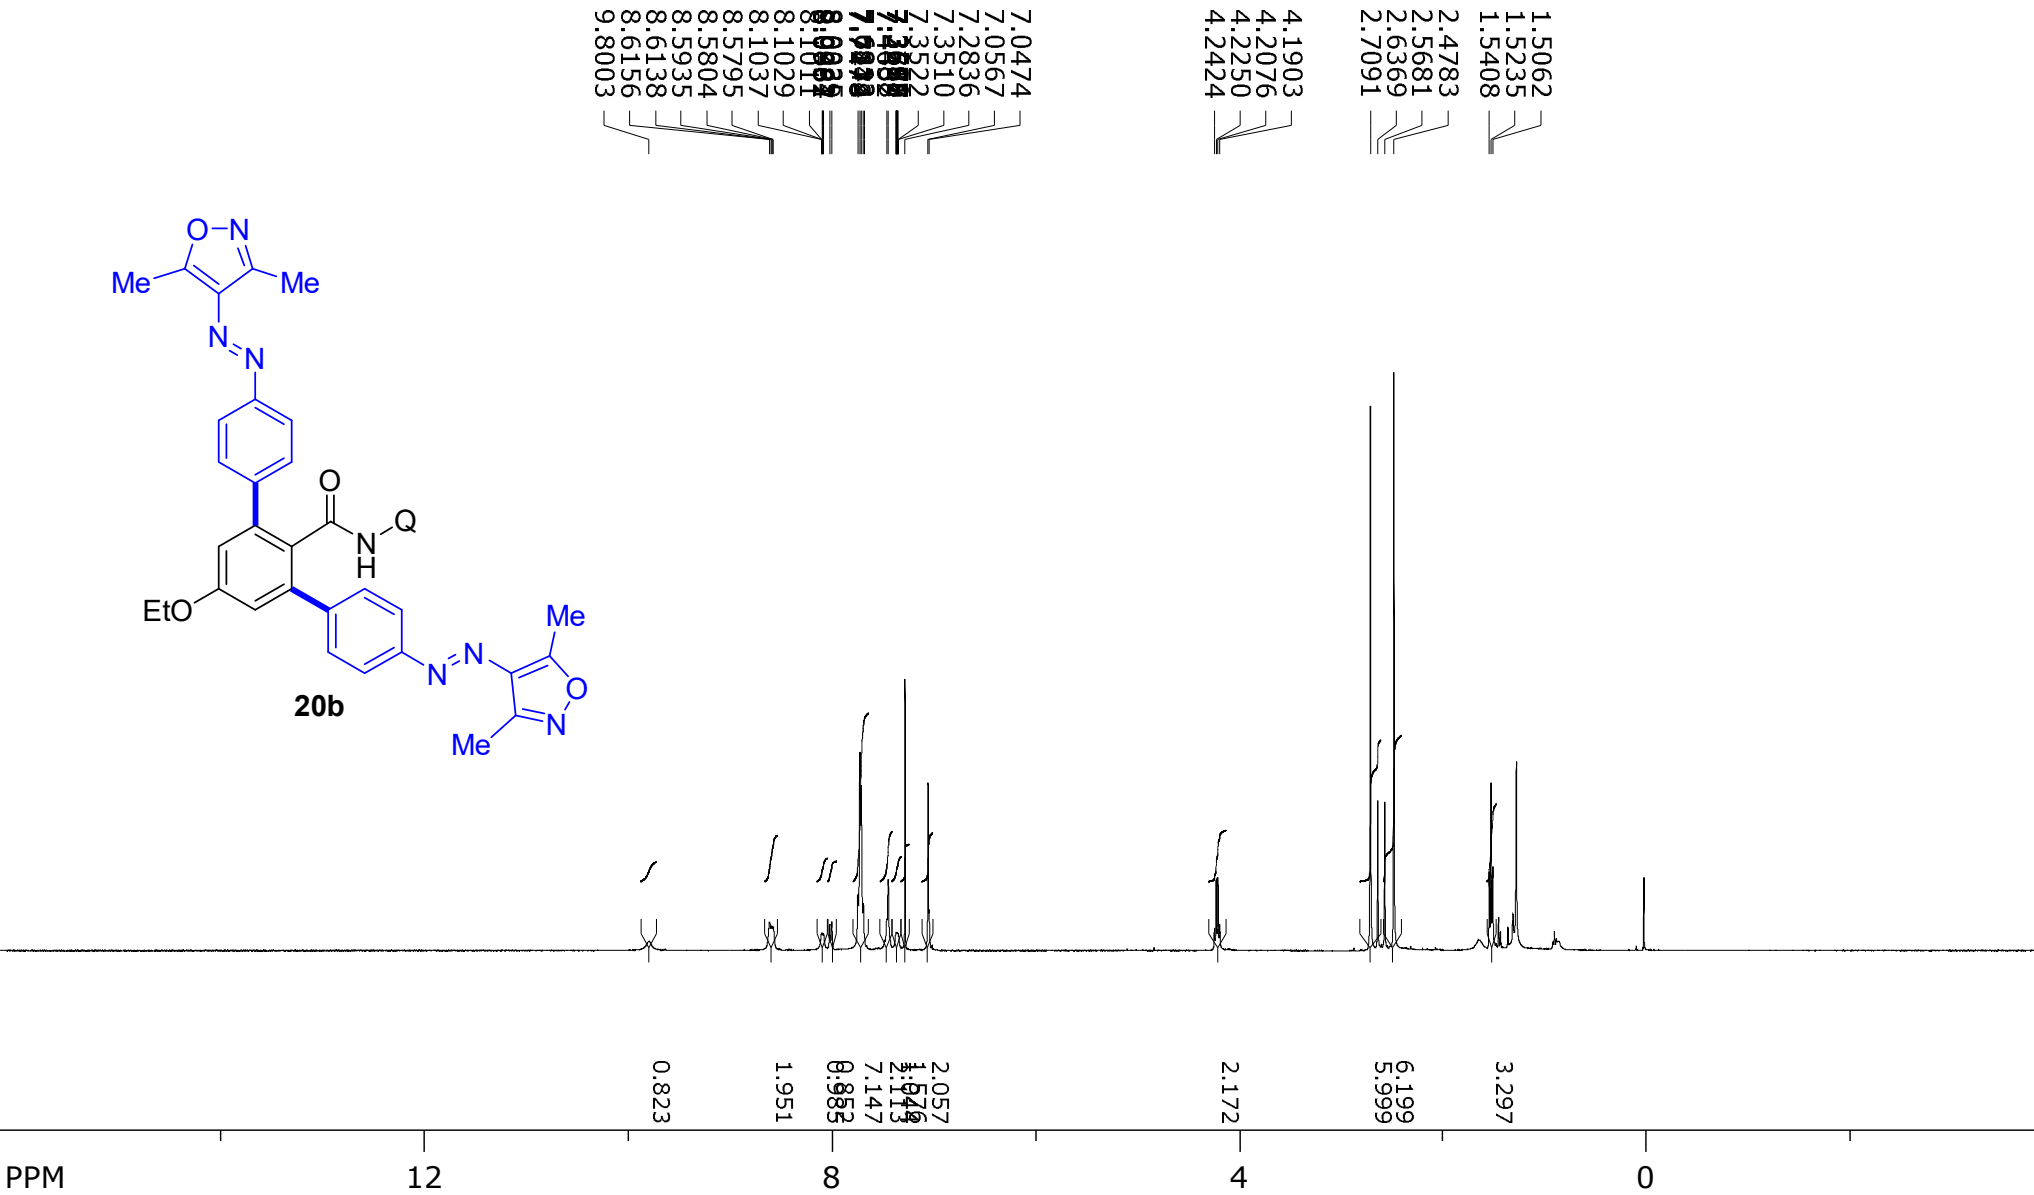



SpinWorks 4: SS-749-REP  
PROTON CDCl3 /opt/topspin3.5pl2/nmrdata nmrsu 31

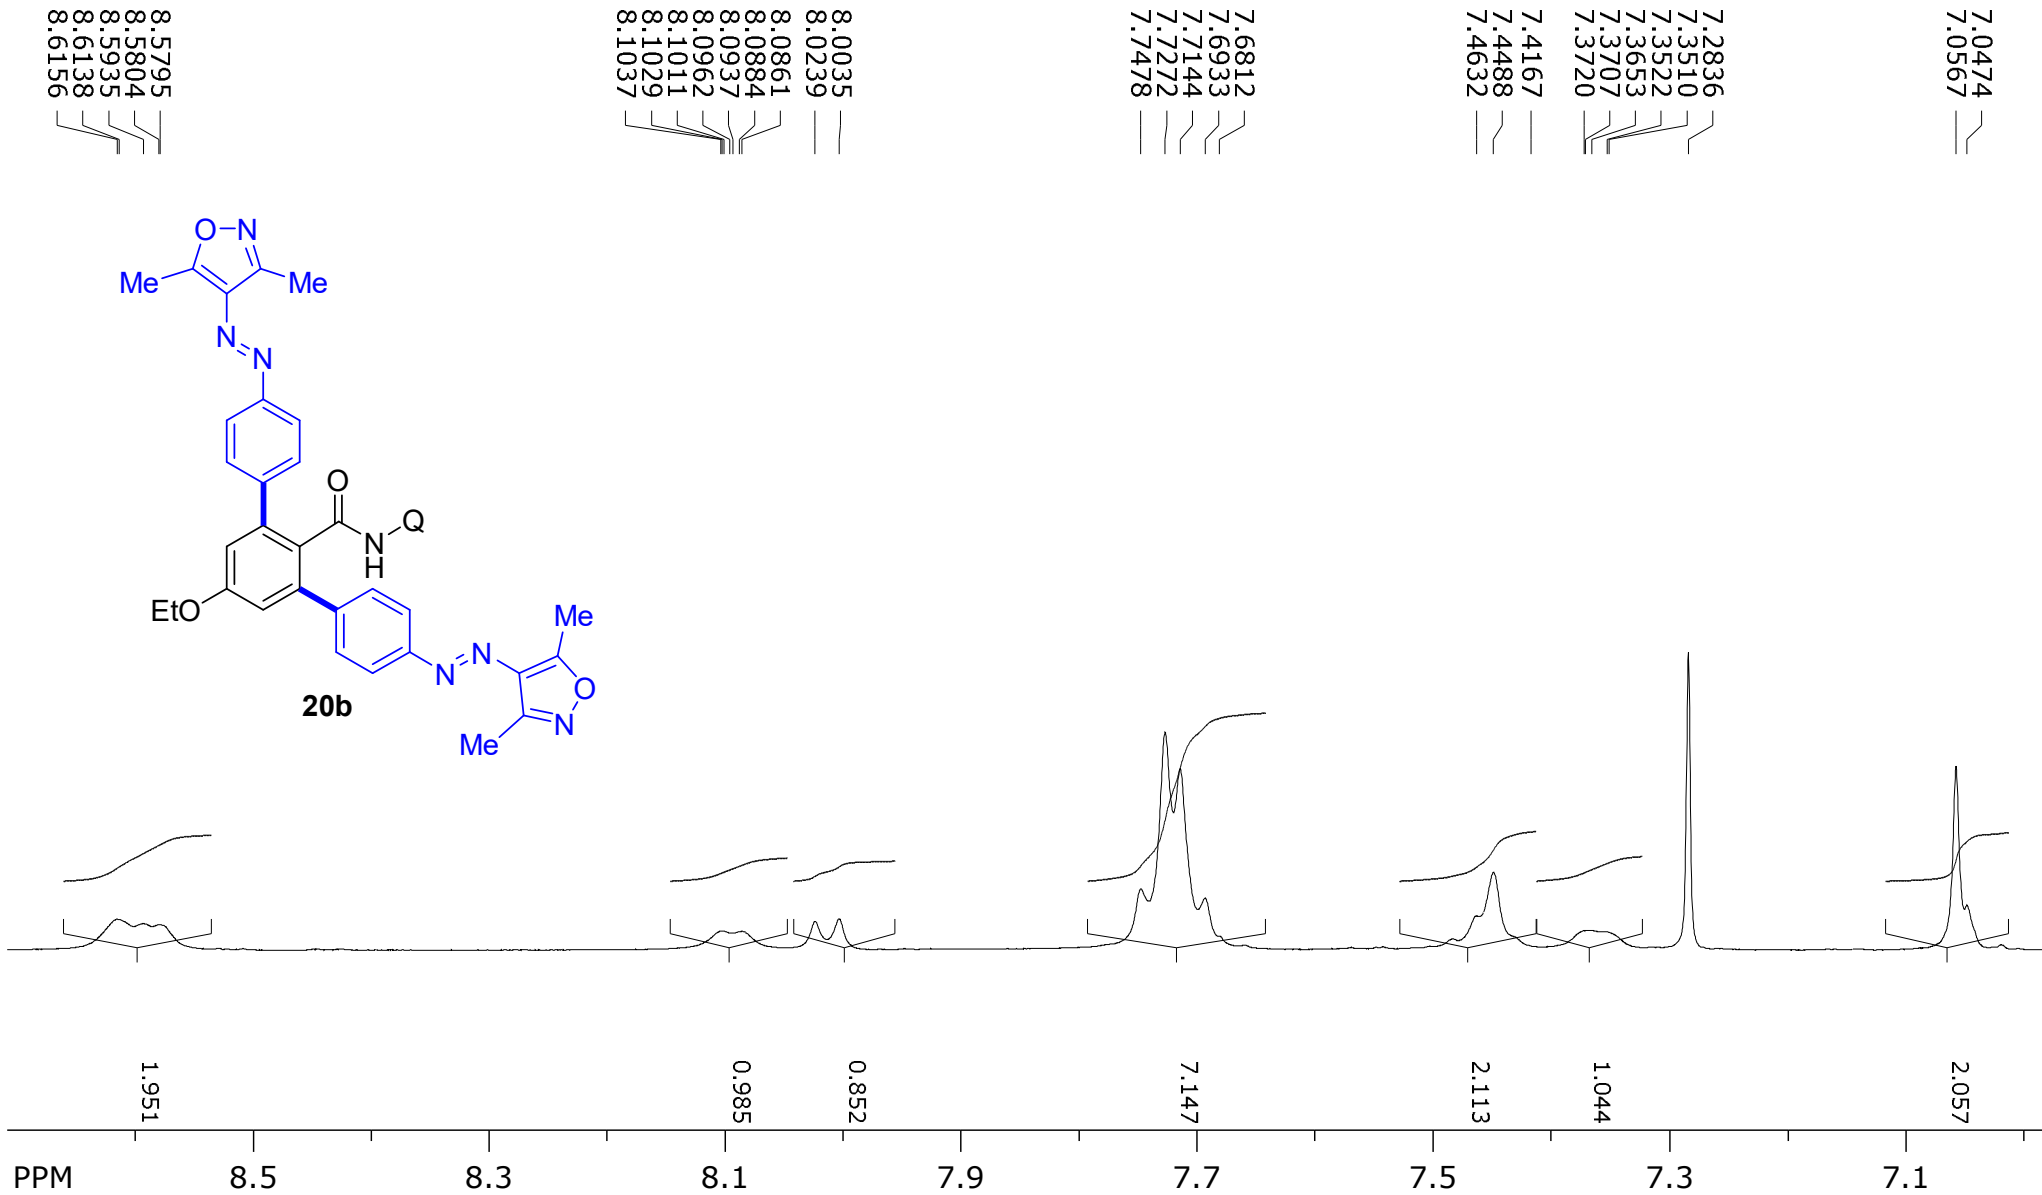

SpinWorks 4: SS-749-REP  
PROTON CDCl3 /opt/topspin3.5pl2/nmrdata nmrsu 31

4.1903  
4.2076  
4.2250  
4.2424

2.4783  
2.5681  
2.6369  
2.7091

1.5062  
1.5235  
1.5408

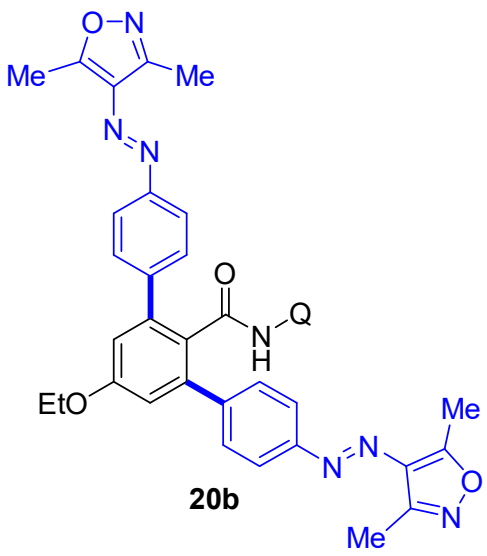

20b

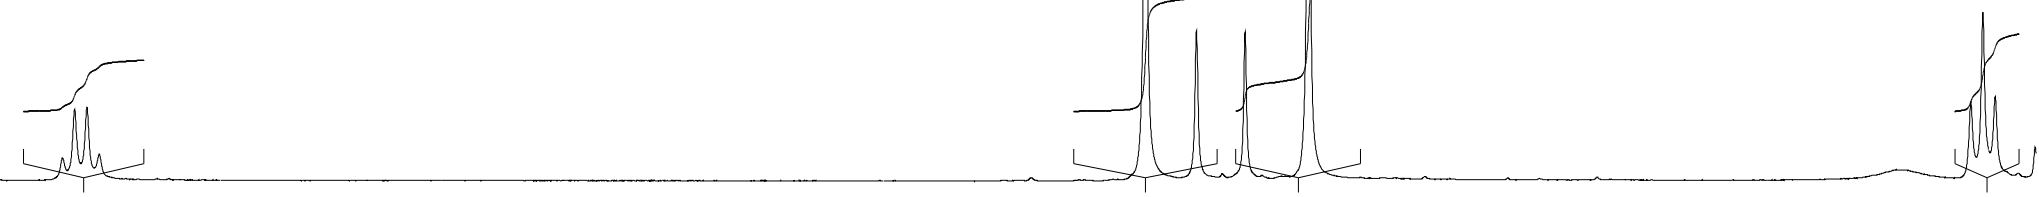

2.172

5.999

6.199

3.297

PPM 4.0 3.6 3.2 2.8 2.4 2.0 1.6

SpinWorks 4: SS-749  
C13CPD CDCl3 /opt/topspin3.5pl2/nmrdata nmrsu 22

115.575  
118.930  
121.300  
121.741  
121.803  
122.202  
127.525  
127.895  
128.889  
129.430  
129.682  
132.479  
141.669  
142.904  
144.141  
147.862  
152.003  
153.686  
159.184  
167.365  
169.361

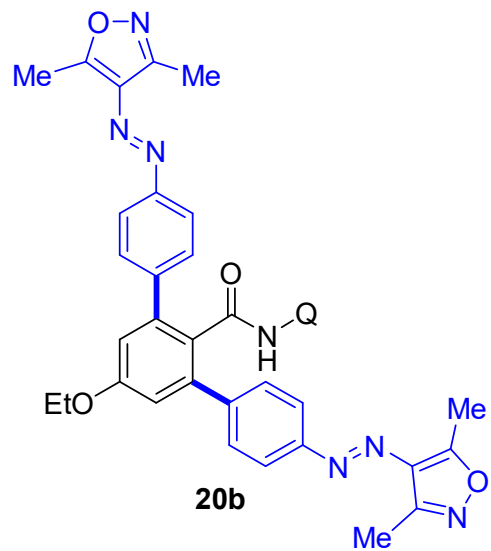

76.733  
77.051  
77.368  
63.943  
11.672  
12.086  
14.837

PPM

160

120

80

40

0

SpinWorks 4: SS 747  
PROTON CDCl3 /opt/topspin3.5pl2/nmrdata nmrsu 60

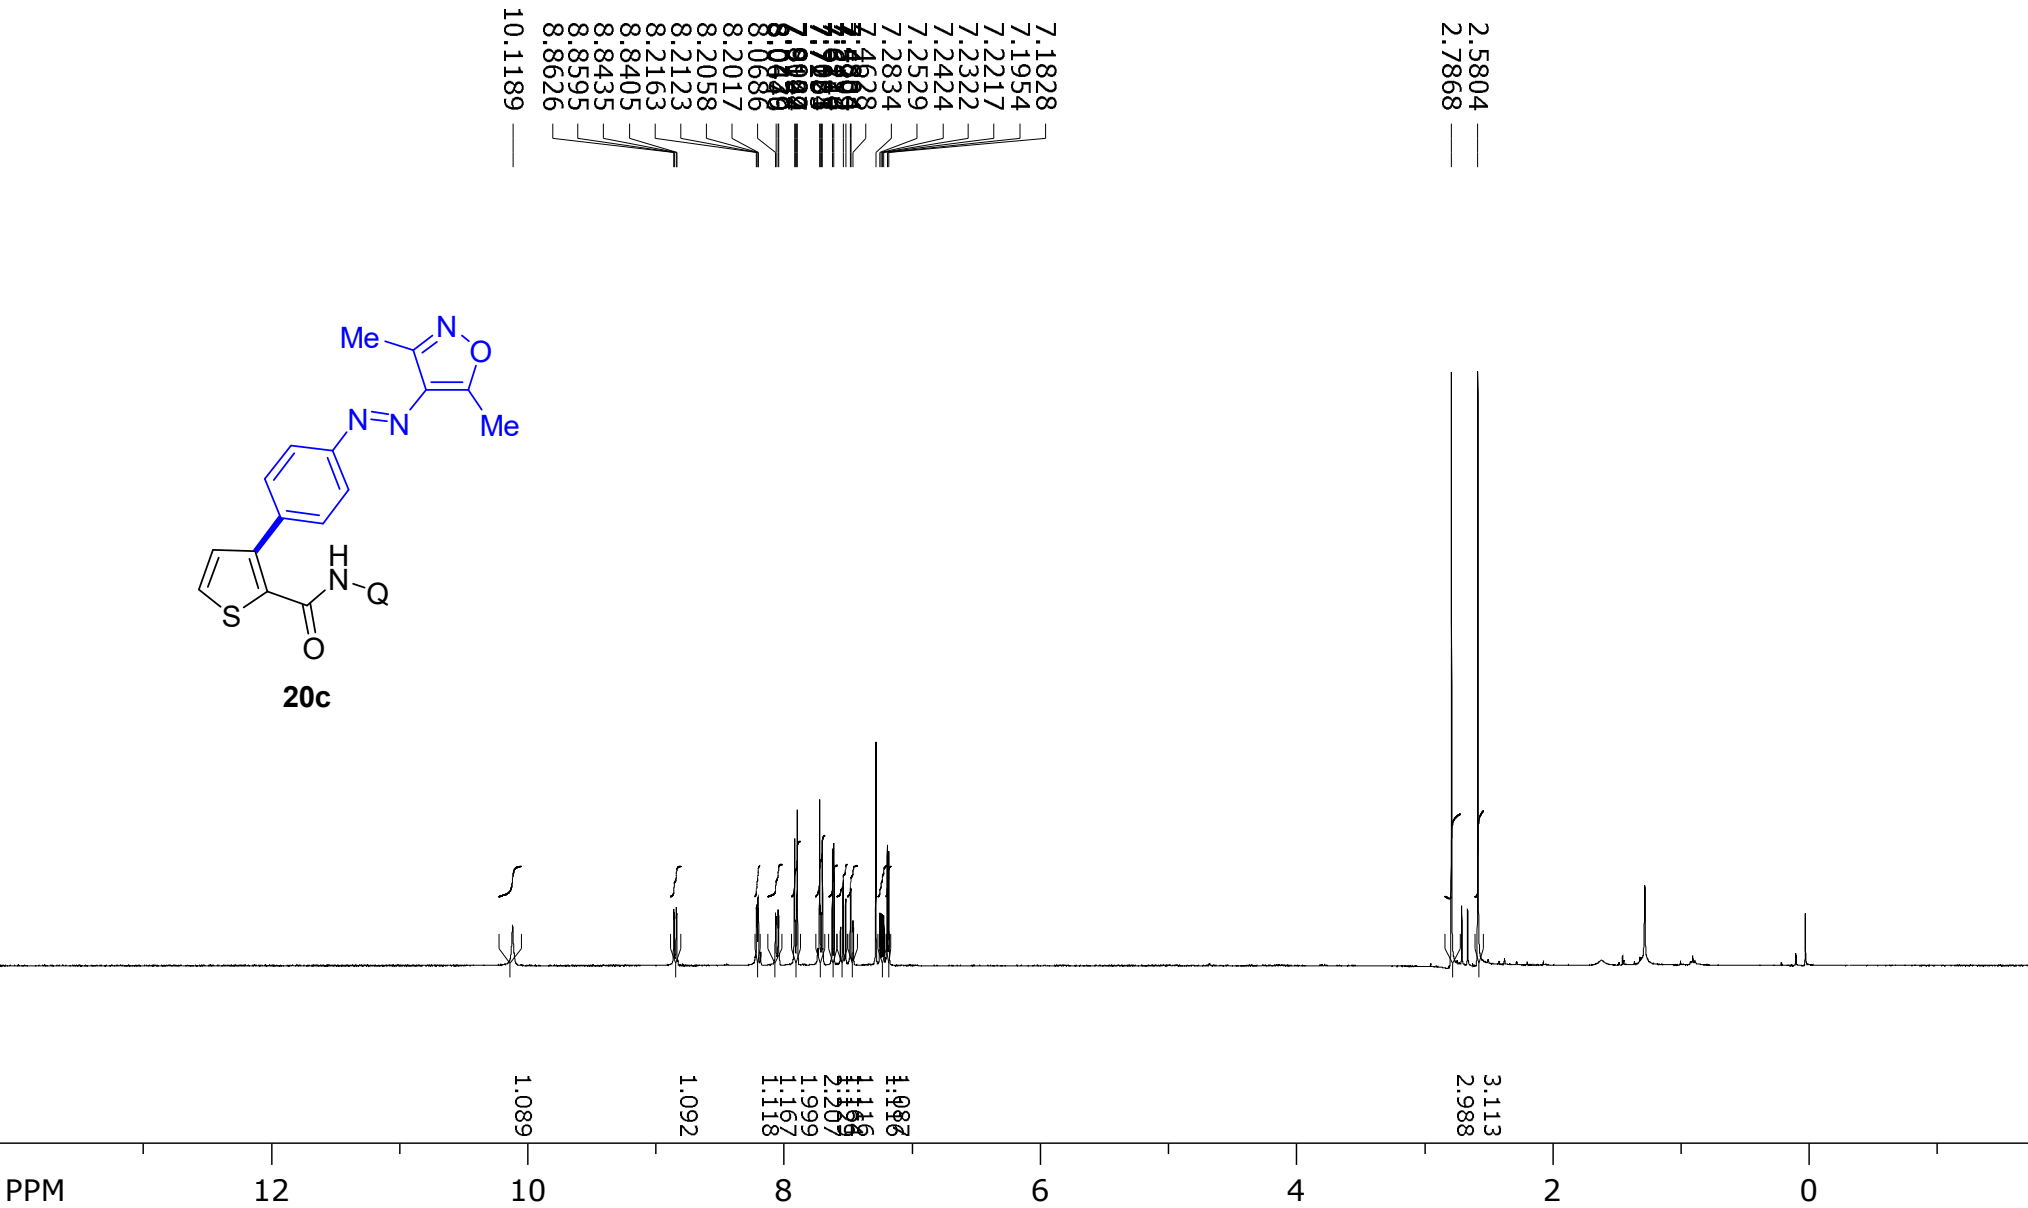

SpinWorks 4: SS 747  
PROTON CDCl3 /opt/topspin3.5pl2/nmrdata nmrsu 60

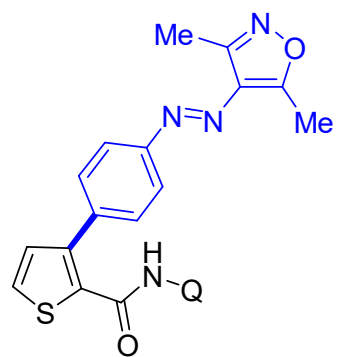

**20c**

10.1189

8.8405  
8.8435  
8.8595  
8.8626

8.0439  
8.0479  
8.0646  
8.0686  
8.2017  
8.2058  
8.2123  
8.2163

1.089

1.092

1.118

1.167

PPM

10.0

9.6

9.2

8.8

8.4

8.0

SpinWorks 4: SS 747  
PROTON CDCl3 /opt/topspin3.5pl2/nmrdata nmrsu 60

7.8982  
7.9027  
7.9149  
7.9194

7.7021  
7.7065  
7.7184  
7.7233

7.6114  
7.6240

7.5605  
7.5399

7.5203

7.4804  
7.4834

7.4594  
7.4628

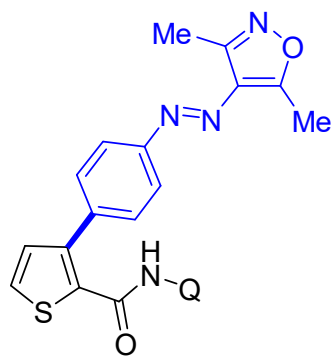

20c

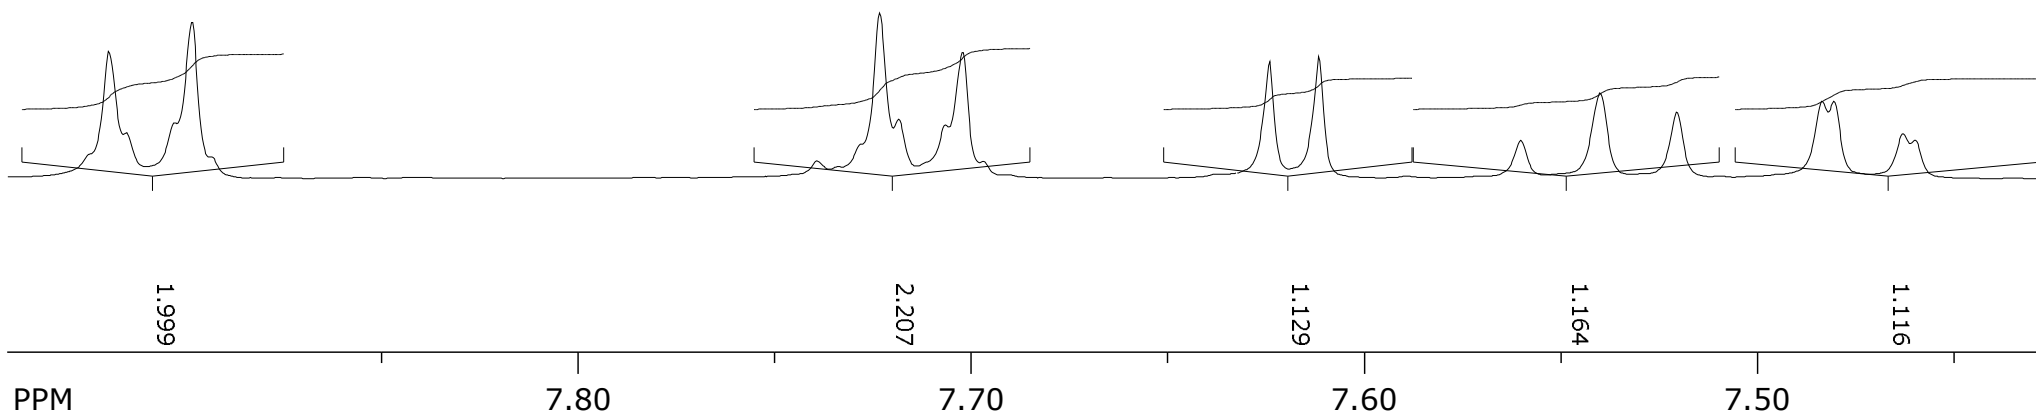

SpinWorks 4: SS 747  
PROTON CDCl3 /opt/topspin3.5pl2/nmrdata nmrsu 60

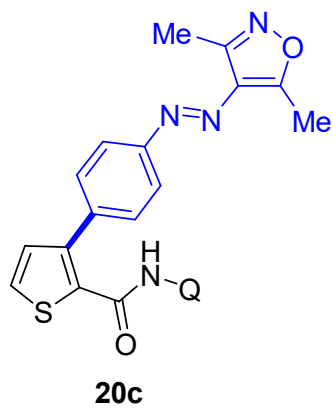

7.2834 —  
7.2529 —  
7.2424 —  
7.2322 —  
7.2217 —  
7.1954 —  
7.1828 —

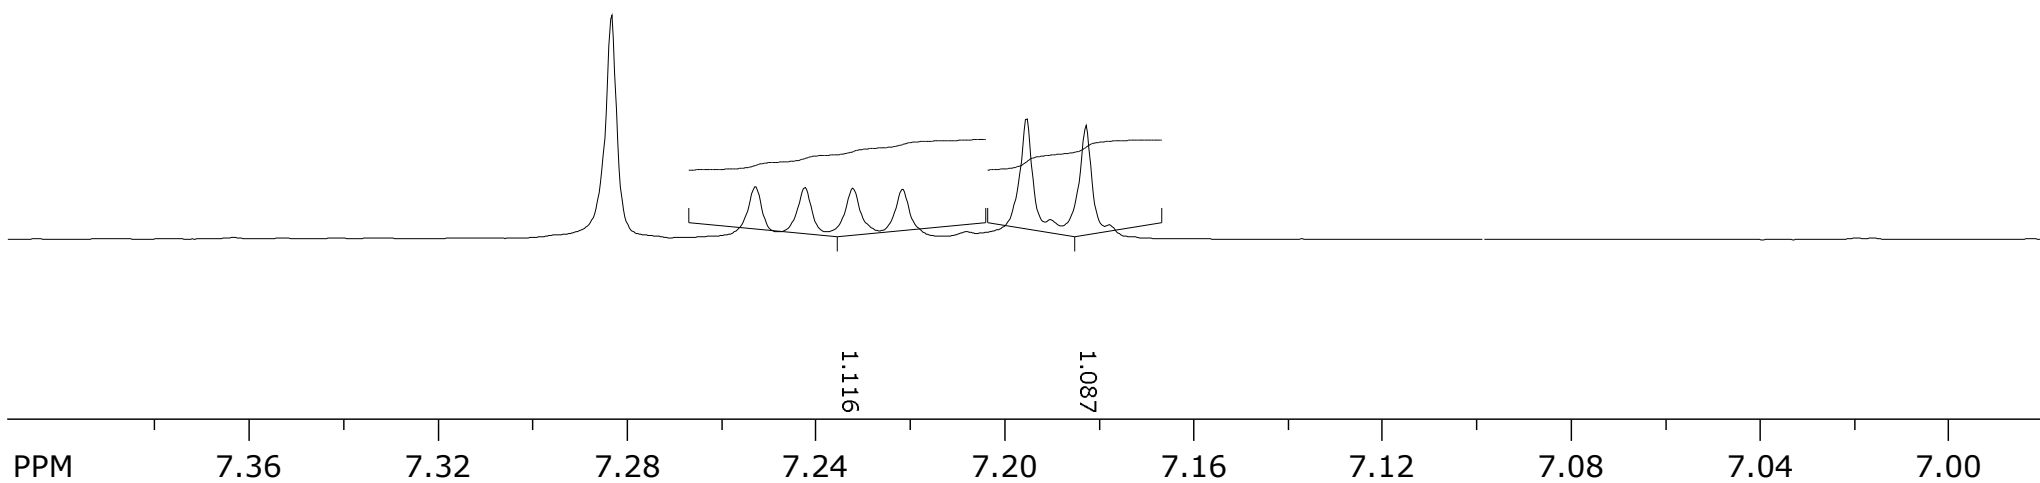

SpinWorks 4: SS 747  
PROTON CDCl3 /opt/topspin3.5pl2/nmrdata nmrsu 60

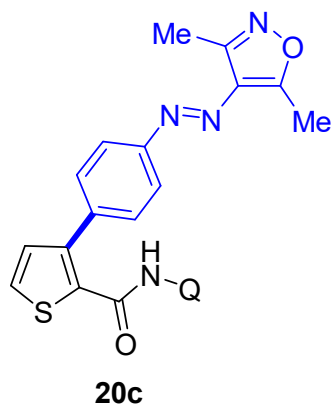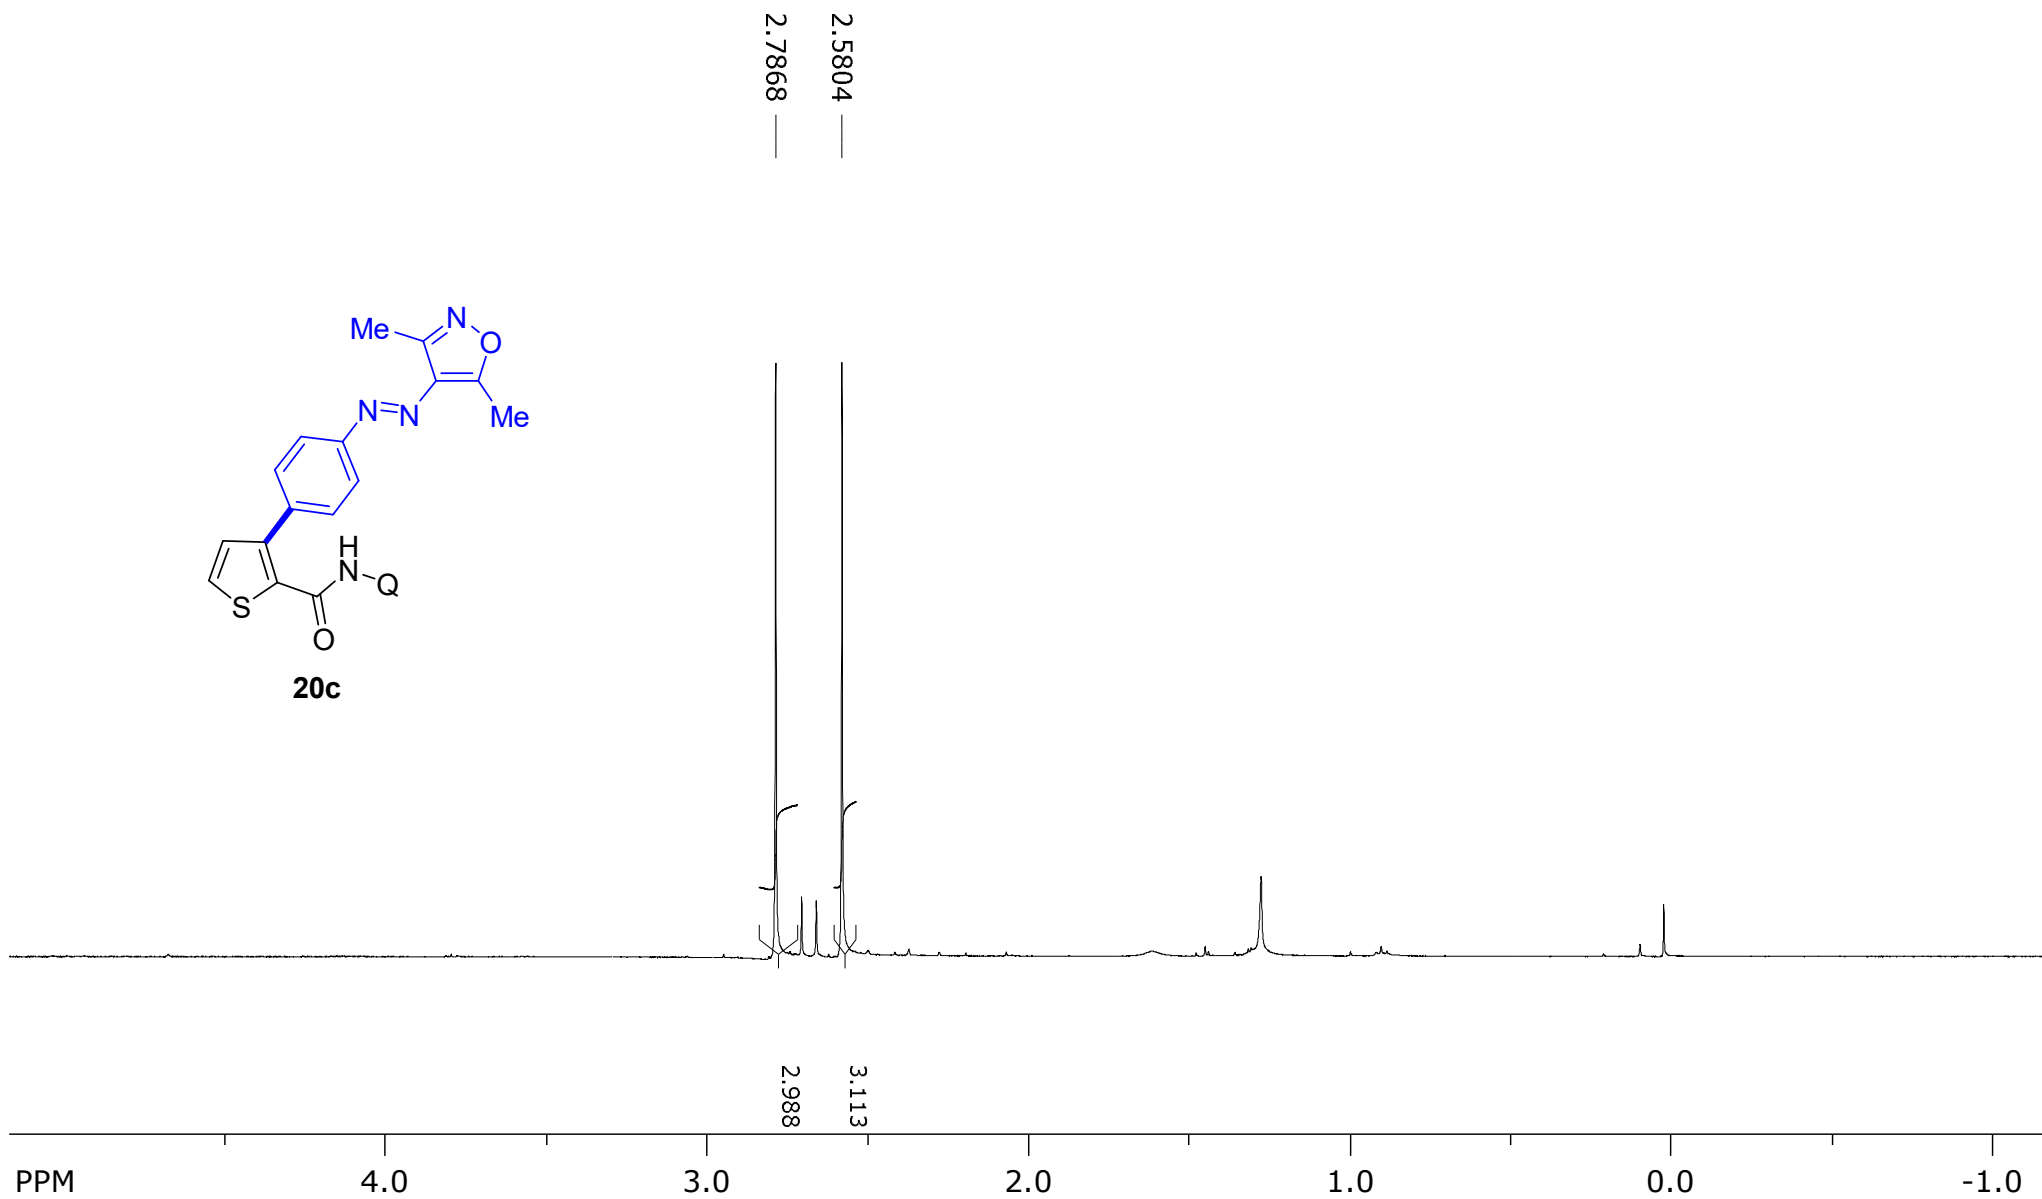



SpinWorks 4: SS 747

C13CPD256 CDCl3 /opt/topspin3.5pl2/nmrdata nmrsu 30

116.642  
121.297  
121.679  
122.928  
127.381  
127.783  
129.584  
130.415  
131.079  
132.697  
134.361  
136.086  
137.564  
138.302  
142.190  
147.468  
152.969  
153.651  
160.460  
169.803

76.770  
77.087  
77.405

11.741  
12.223

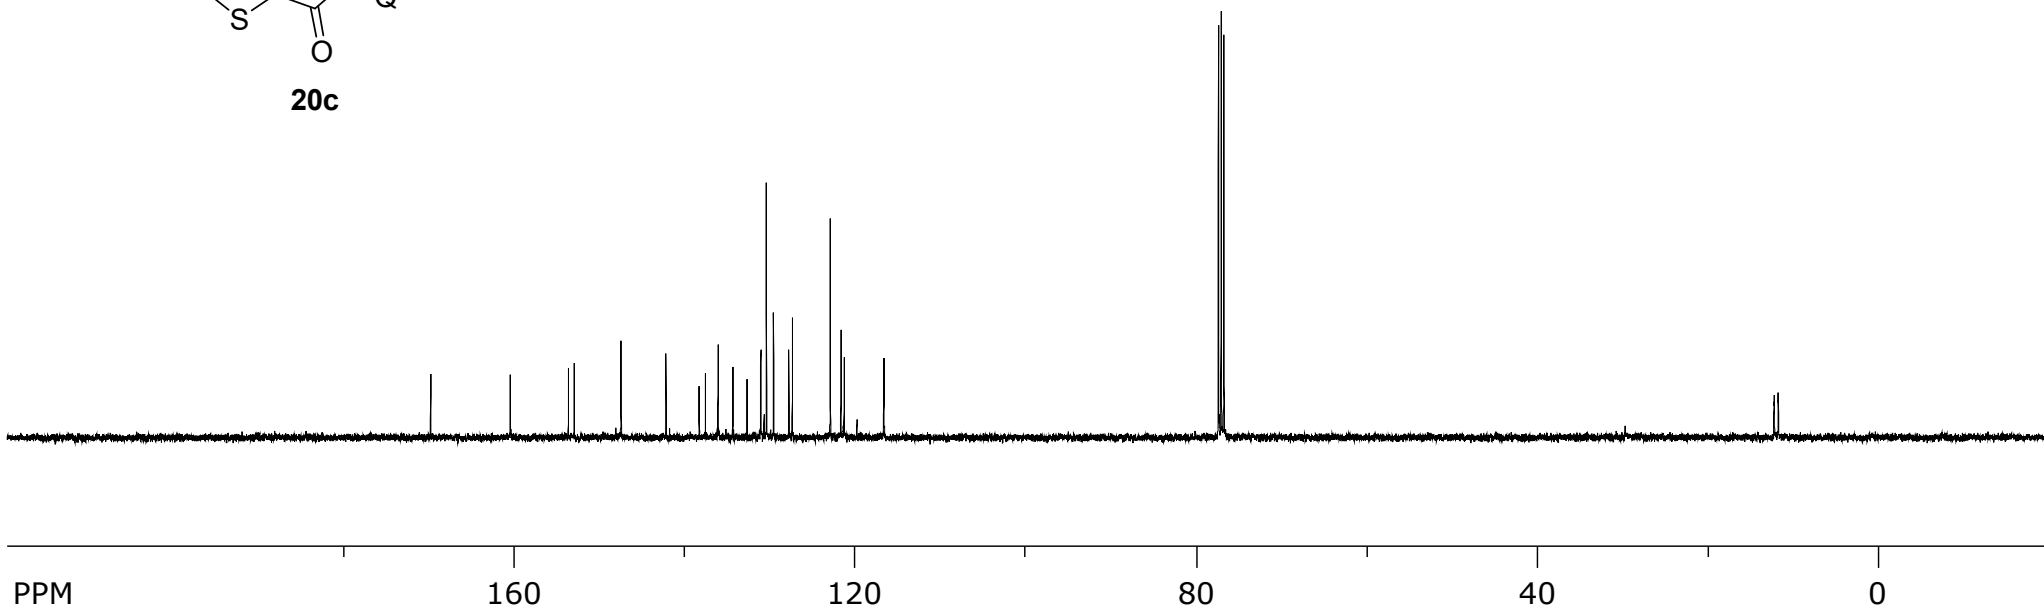

SpinWorks 4: SS 296 P  
PROTON CDCl3 /opt/topspin3.5pl2/nmrdata nmrsu 51

7.4063  
7.4168  
7.4208  
7.4208  
7.4208  
7.5508  
7.5616  
7.8954  
7.9145  
7.9325  
8.1244  
8.1450  
8.7646  
8.7749  
8.7886  
8.8071  
9.7758

1.4804  
1.4977  
2.0335  
2.0618  
2.0719  
2.0748  
2.0748  
2.0748  
3.6569  
3.6945  
3.6945  
3.6945

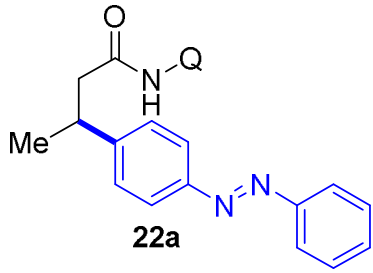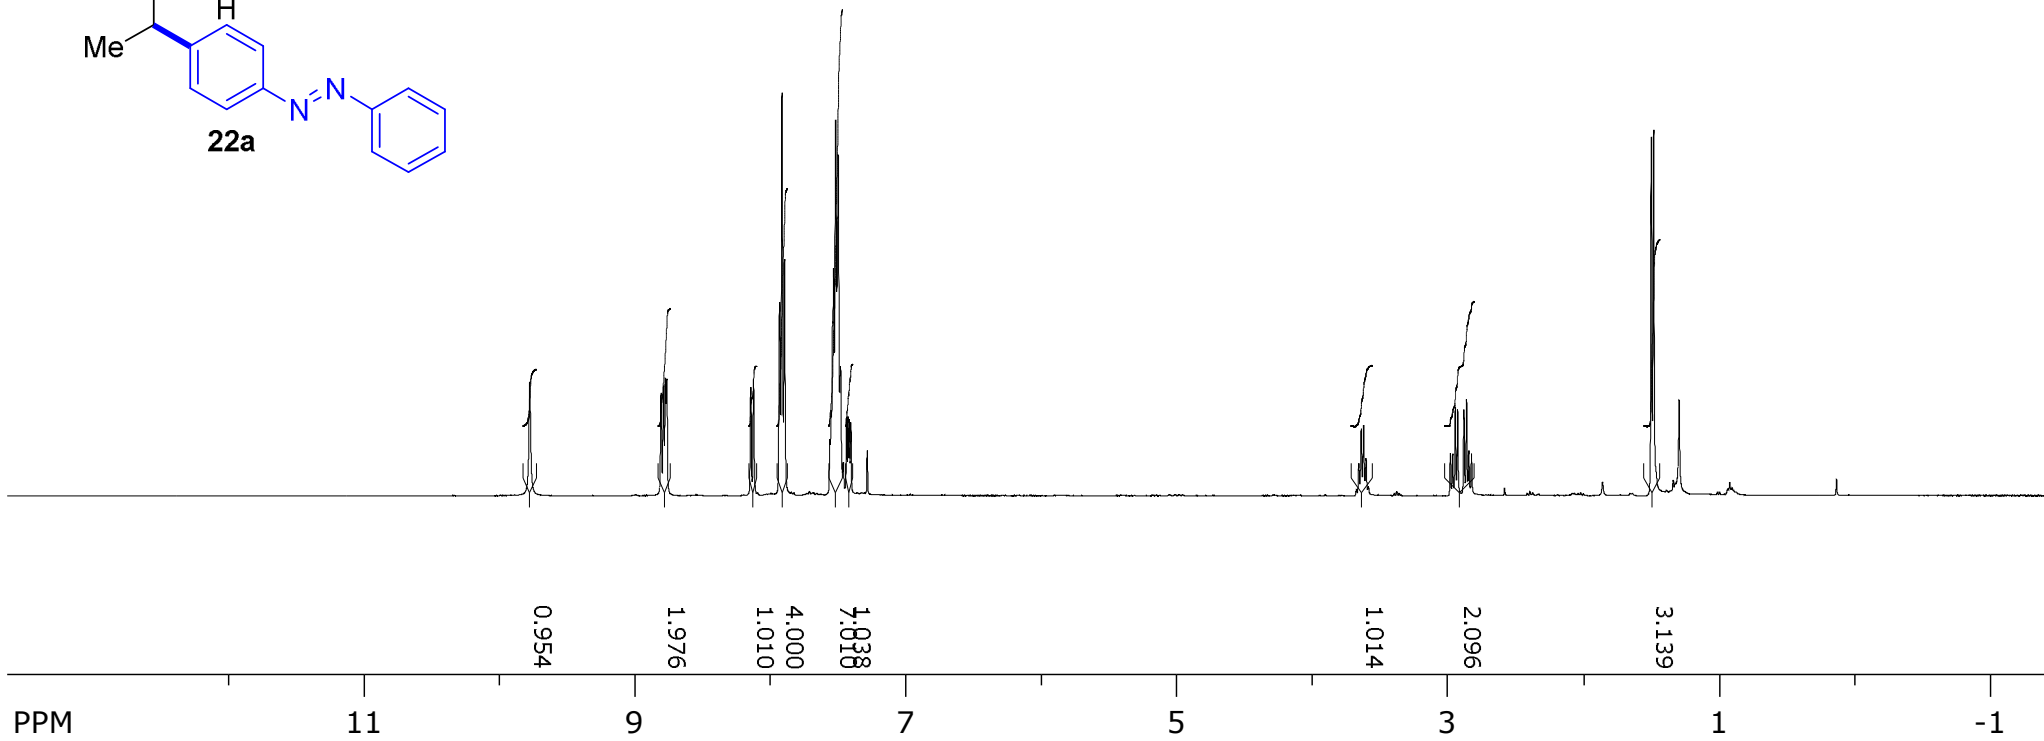

SpinWorks 4: SS 296 P  
PROTON CDCl3 /opt/topspin3.5pl2/nmrdata nmrsu 51

8.7646  
8.7749  
8.7886  
8.8071  
8.1244  
8.1450  
7.8954  
7.9145  
7.9325  
7.4063  
7.4168  
7.4269  
7.4373  
7.4818  
7.4996  
7.5181  
7.5334  
7.5404  
7.5508  
7.5616

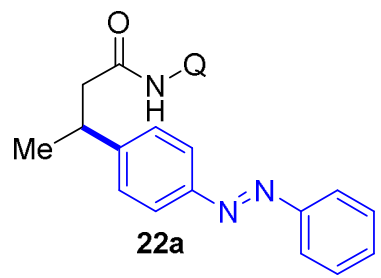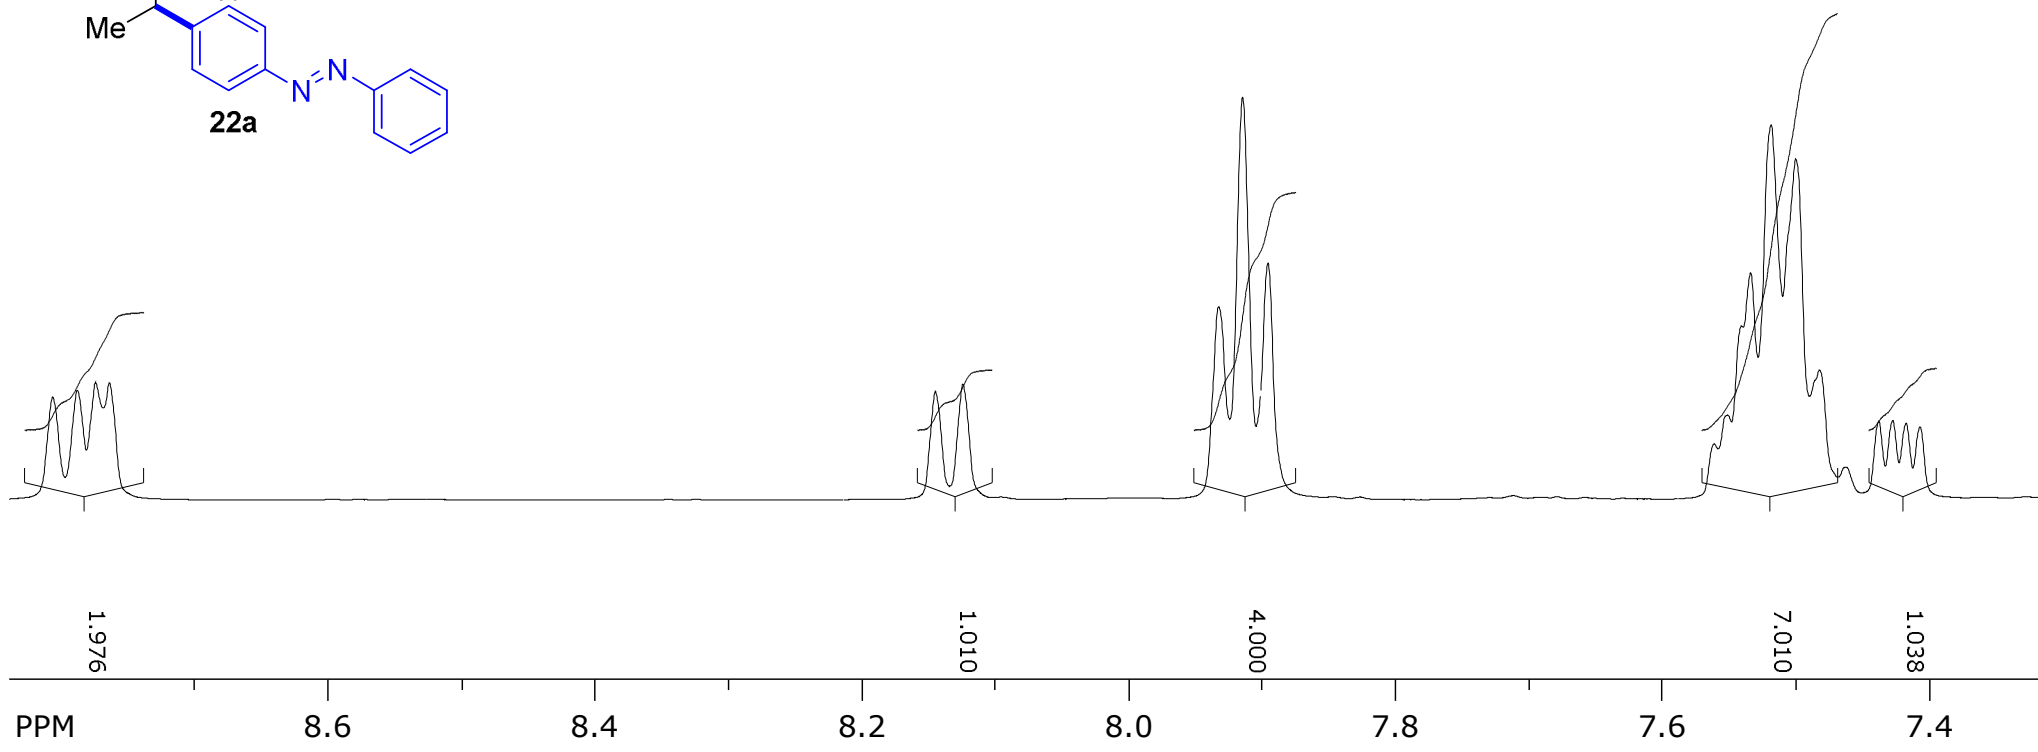

SpinWorks 4: SS 296 P  
PROTON CDCl3 /opt/topspin3.5pl2/nmrdata nmrsu 51

3.5845  
3.6011  
3.6211  
3.6389  
3.6569  
3.6746

2.9270  
2.9443  
2.9633  
2.9835  
2.8242  
2.8429  
2.8612  
2.8808

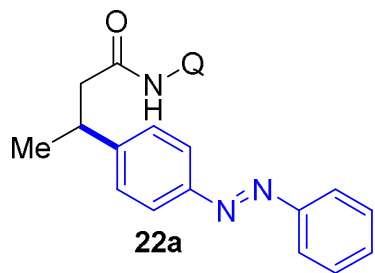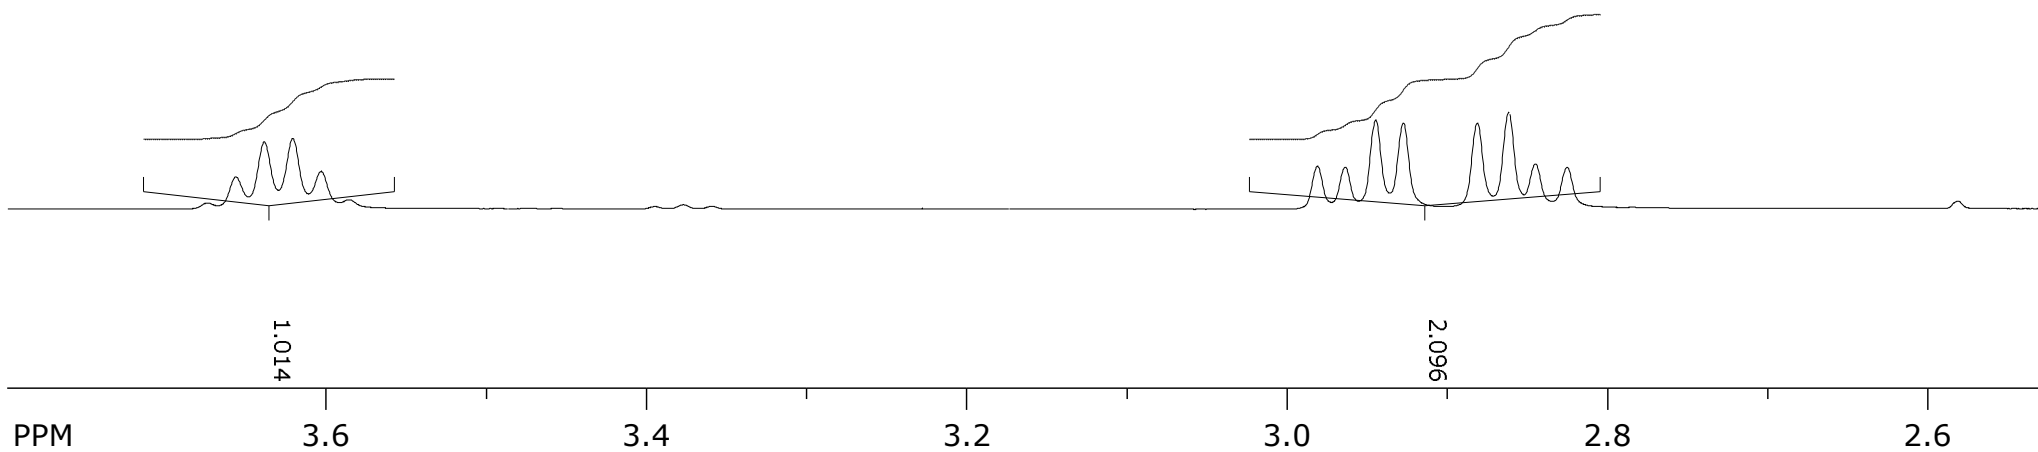

SpinWorks 4: SS 296 P  
PROTON CDCl3 /opt/topspin3.5pl2/nmrdata nmrsu 51

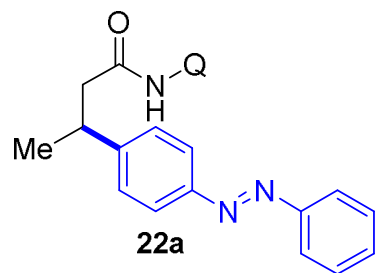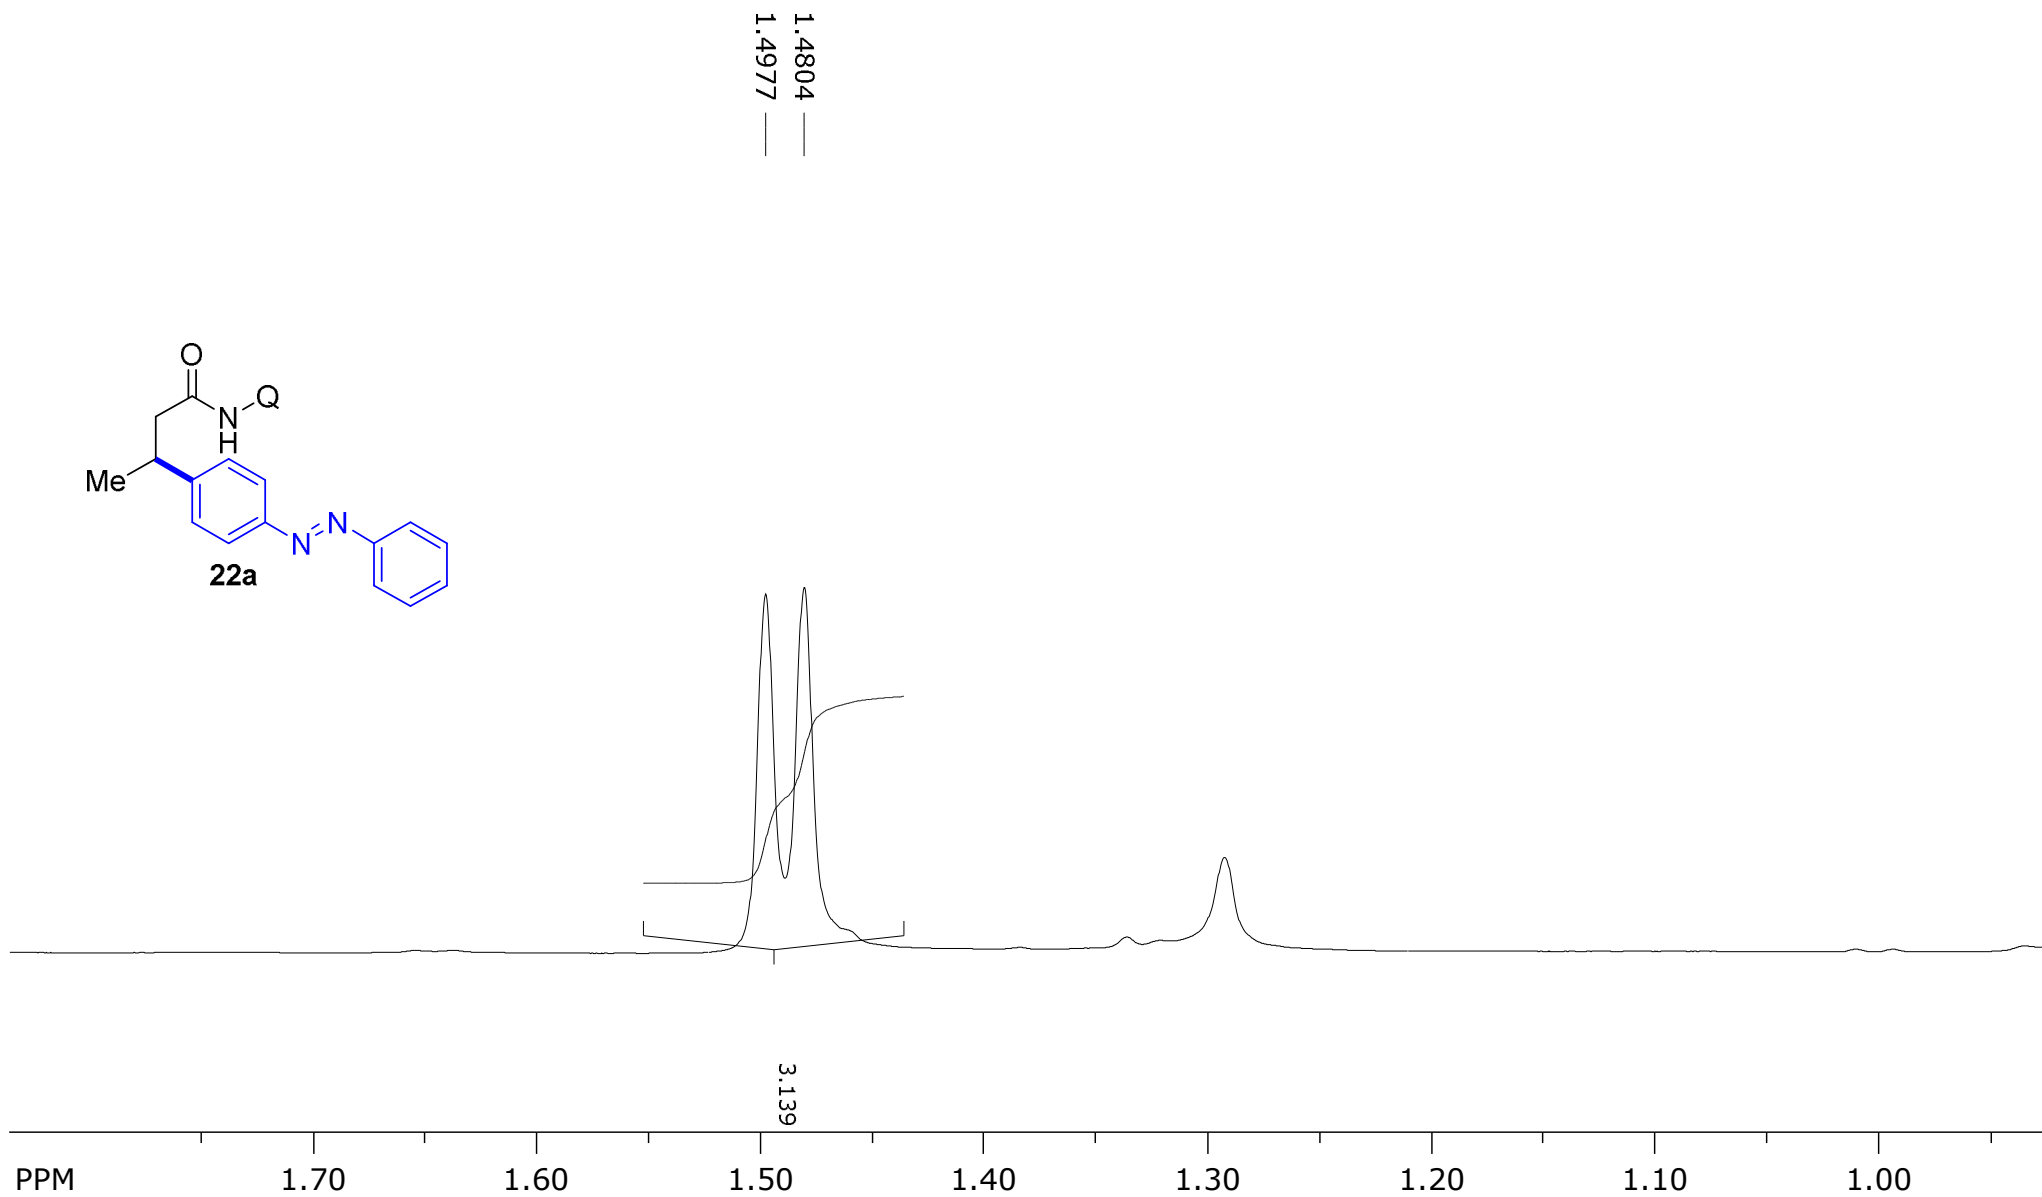

SpinWorks 4: SS 296 P  
C13CPD CDCl3 /opt/topspin3.5pl2/nmrdata nmrsu 51

170.017 —  
148.135 —  
149.338 —  
151.398 —  
152.723 —  
138.264 —  
136.341 —  
134.344 —  
130.844 —  
129.099 —  
127.897 —  
127.663 —  
127.387 —  
123.253 —  
122.784 —  
121.605 —  
121.561 —  
116.487 —  
76.789 —  
77.106 —  
77.424 —  
46.685 —  
36.843 —  
21.792 —

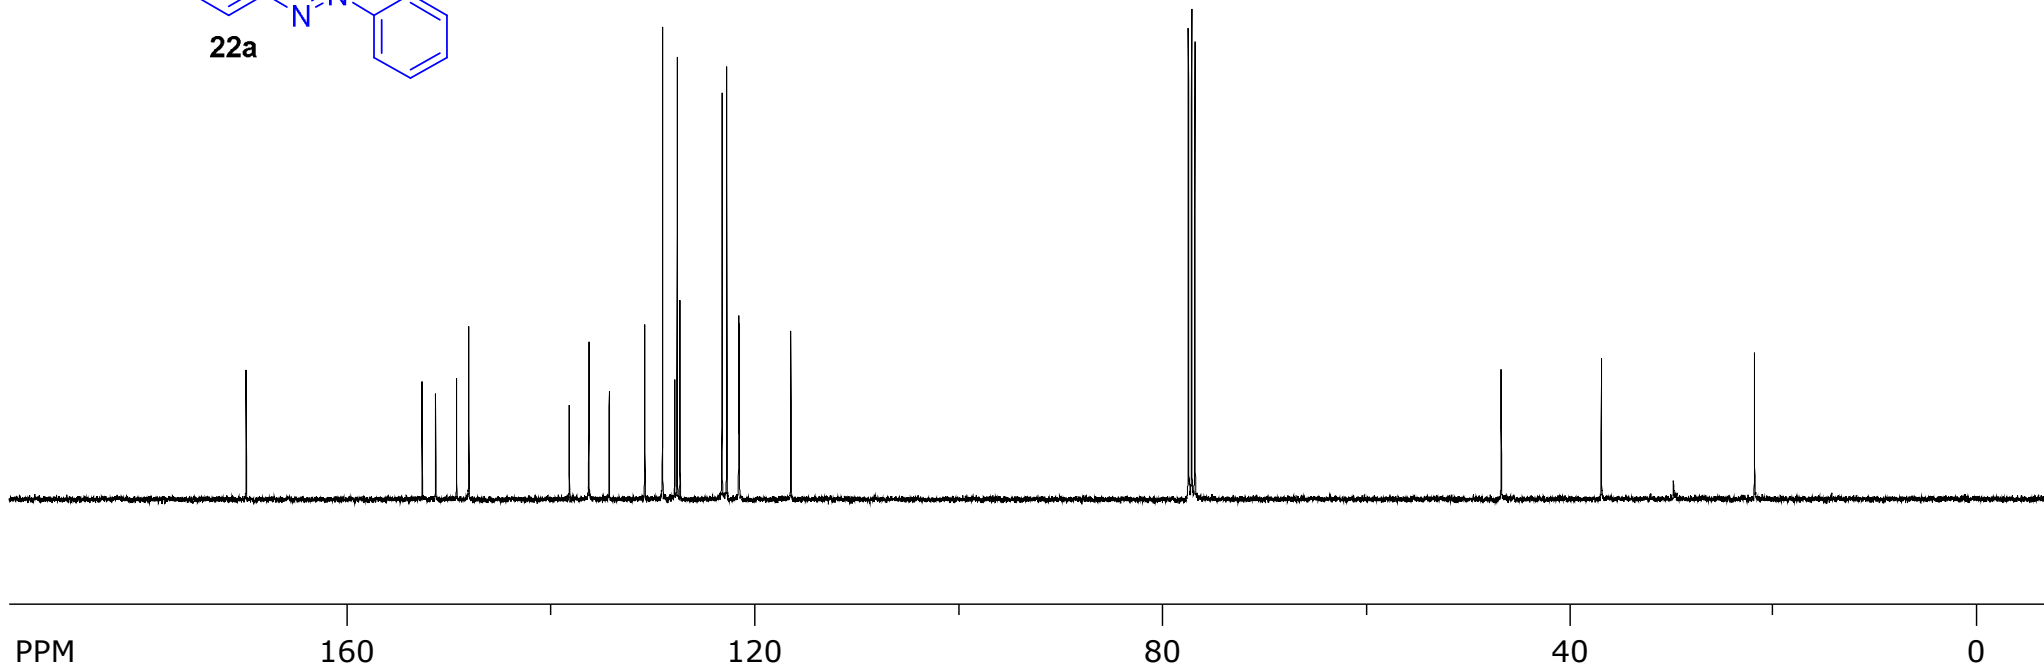



SpinWorks 4: SS 305 P REP  
1H

9.8070

8.7148  
8.7207  
8.7311  
8.7371  
8.7633  
8.7671  
8.7738  
8.7777

8.1353  
8.1392  
8.1560  
8.1599

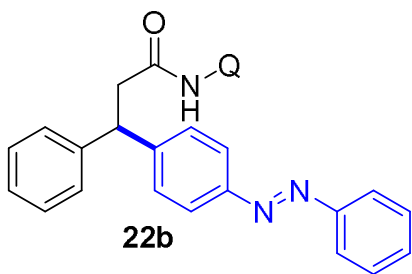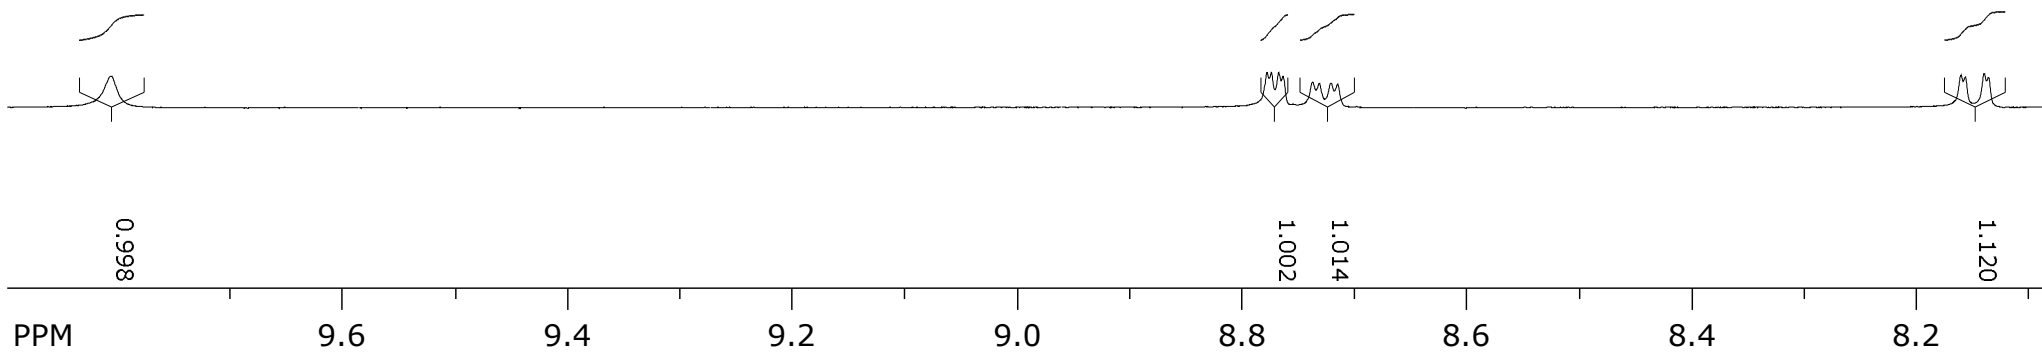

220



SpinWorks 4: SS 305 P REP  
1H

7.8529 —  
7.8740 —  
7.8916 —  
7.8952 —

7.2034 —  
7.2215 —  
7.2395 —  
7.2835 —  
7.3116 —  
7.3311 —  
7.3497 —  
7.3814 —  
7.3996 —  
7.4257 —  
7.4362 —  
7.4464 —  
7.4569 —  
7.4678 —  
7.4820 —  
7.4849 —  
7.4888 —  
7.4976 —  
7.5013 —  
7.5094 —  
7.5154 —  
7.5299 —

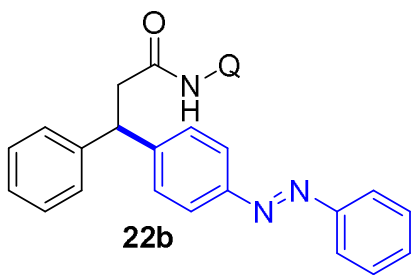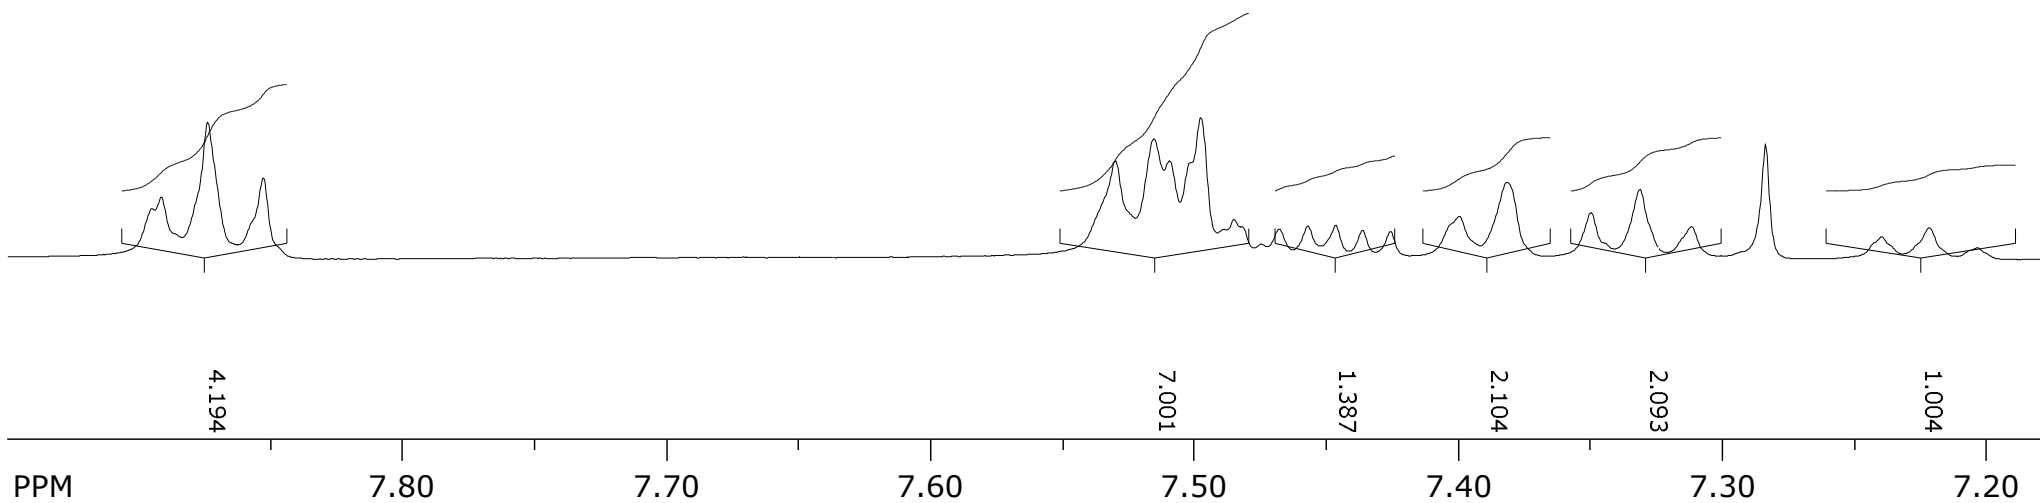

SpinWorks 4: SS 305 P REP  
1H

4.8857  
4.9049  
4.9241

3.3841  
3.4034

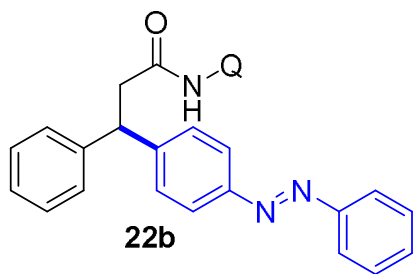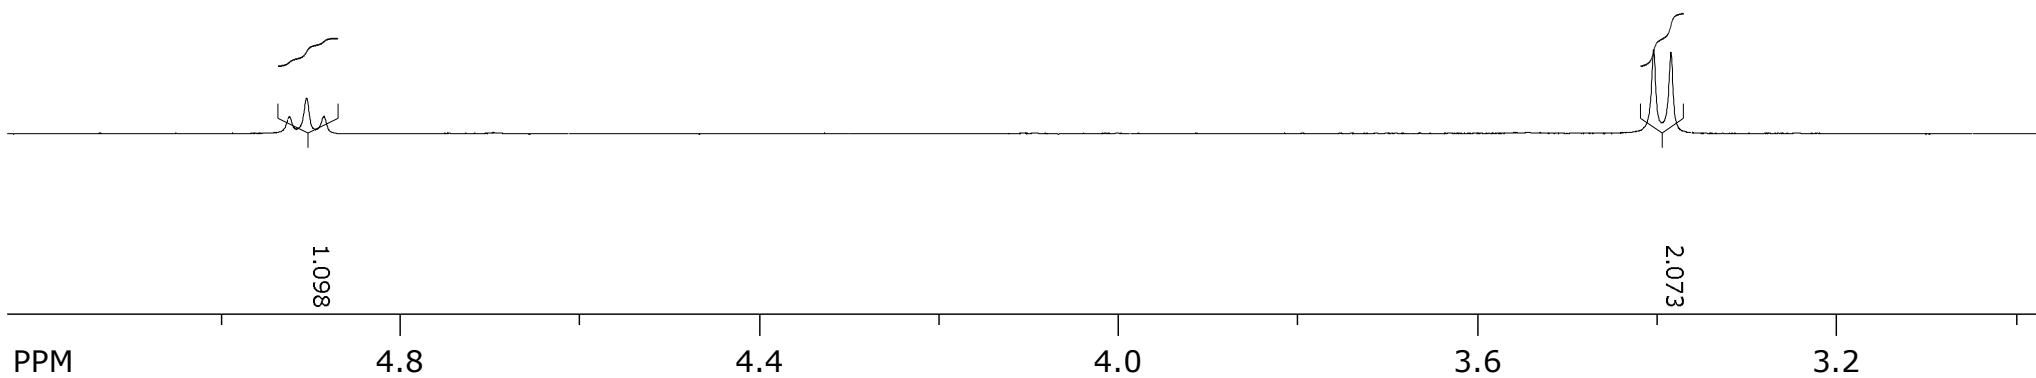

SpinWorks 4: SV100706  
C13CPD CDCl3 {D:\Spectra} nmr 6

SS-305

169.271

152.709  
151.350  
148.098  
147.002  
143.228  
138.242  
136.328  
134.252  
130.854  
129.065  
128.786  
128.814  
127.842  
127.363  
126.765  
123.223  
122.771  
121.585  
121.571  
116.563

77.308  
77.055  
76.801

47.057  
44.245

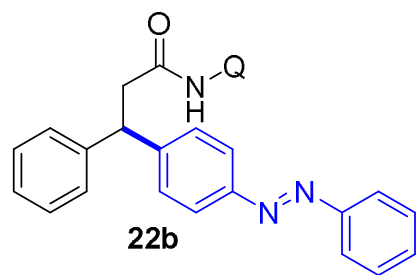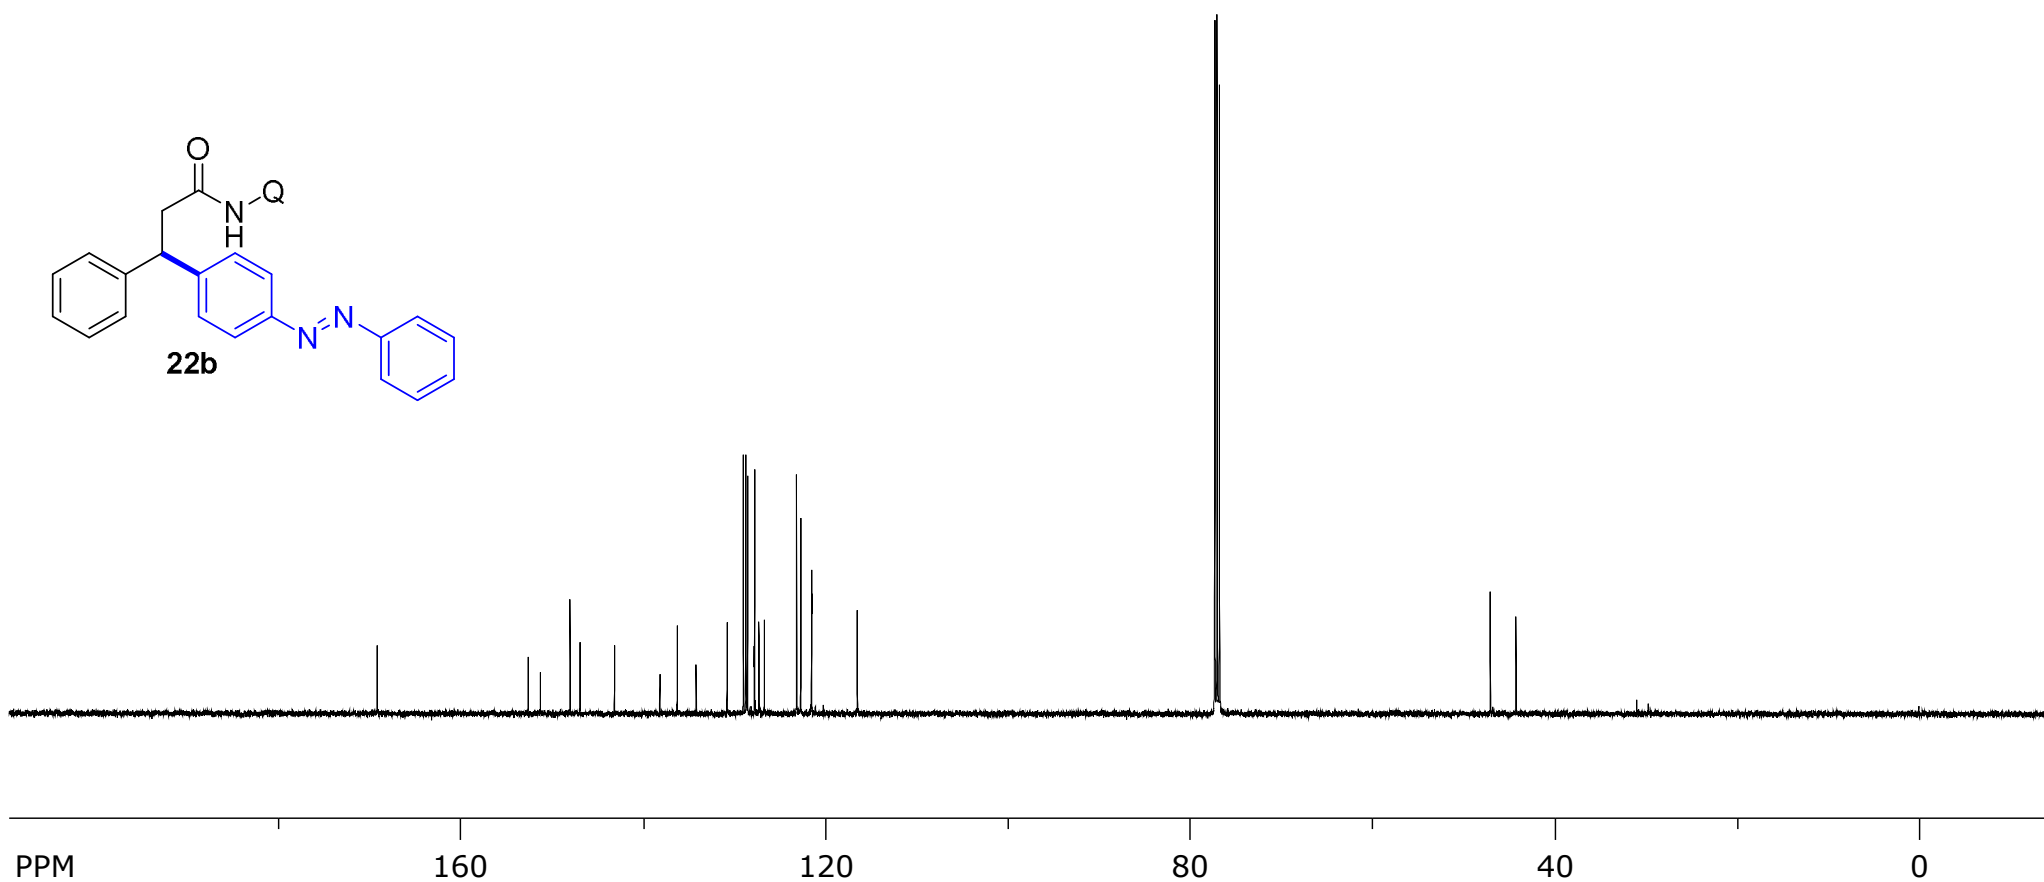



SpinWorks 4: SS 297 P  
PROTON CDCl3 /opt/topspin3.5pl2/nmrdata nmrsu 38

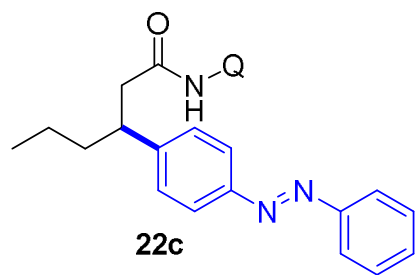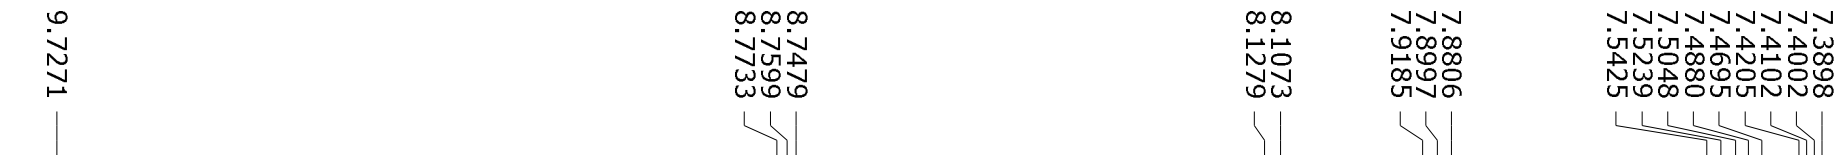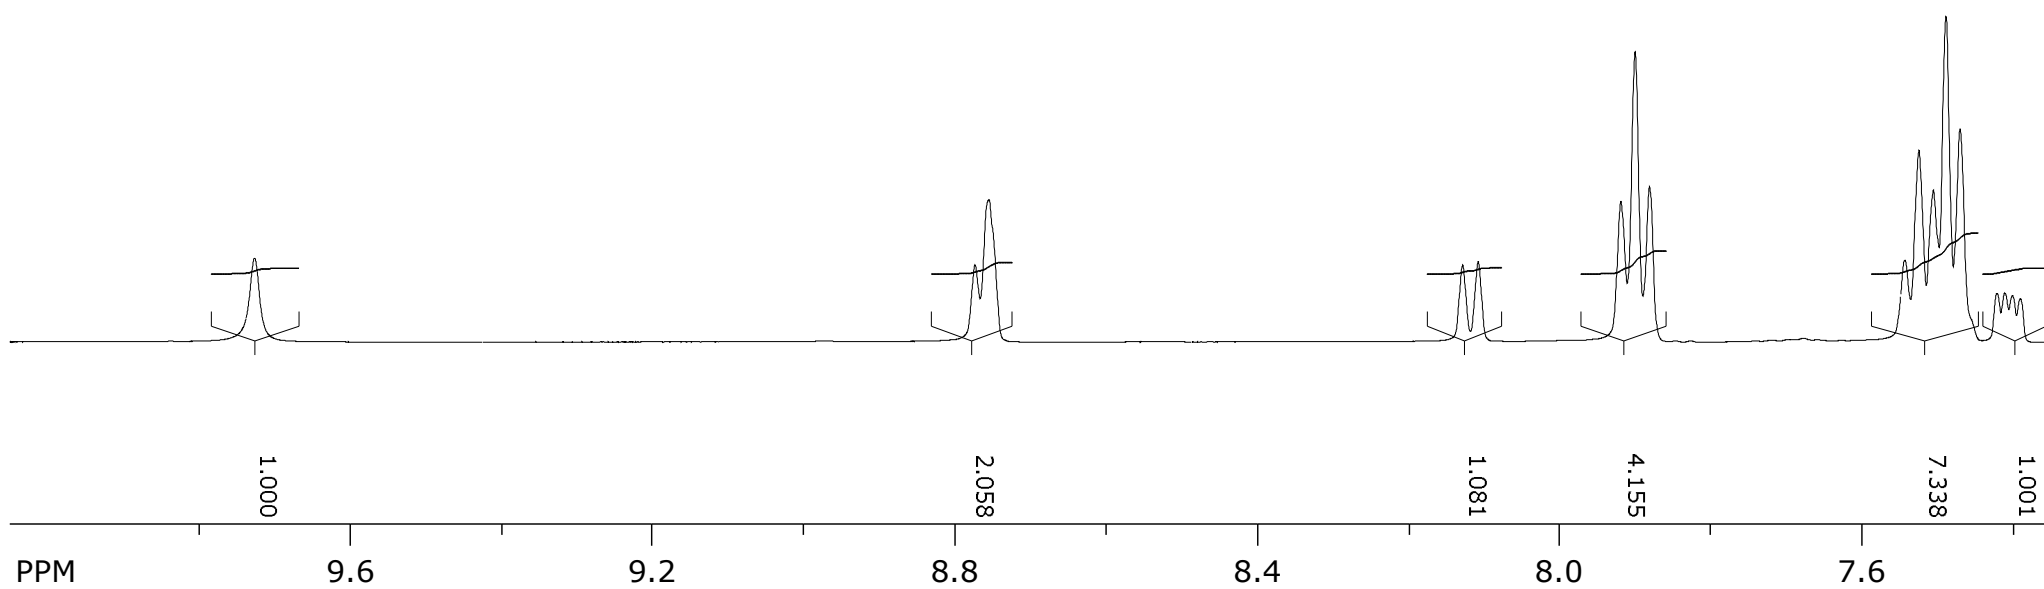

SpinWorks 4: SS 297 P  
PROTON CDCl3 /opt/topspin3.5pl2/nmrdata nmrsu 38

3.4211  
3.4396  
3.4552  
3.4588  
3.4744

2.8628  
2.8836  
2.9005  
2.9170  
2.9305  
2.9499  
2.9675

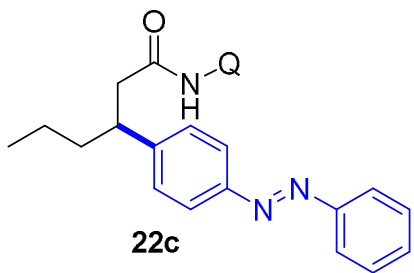

22c

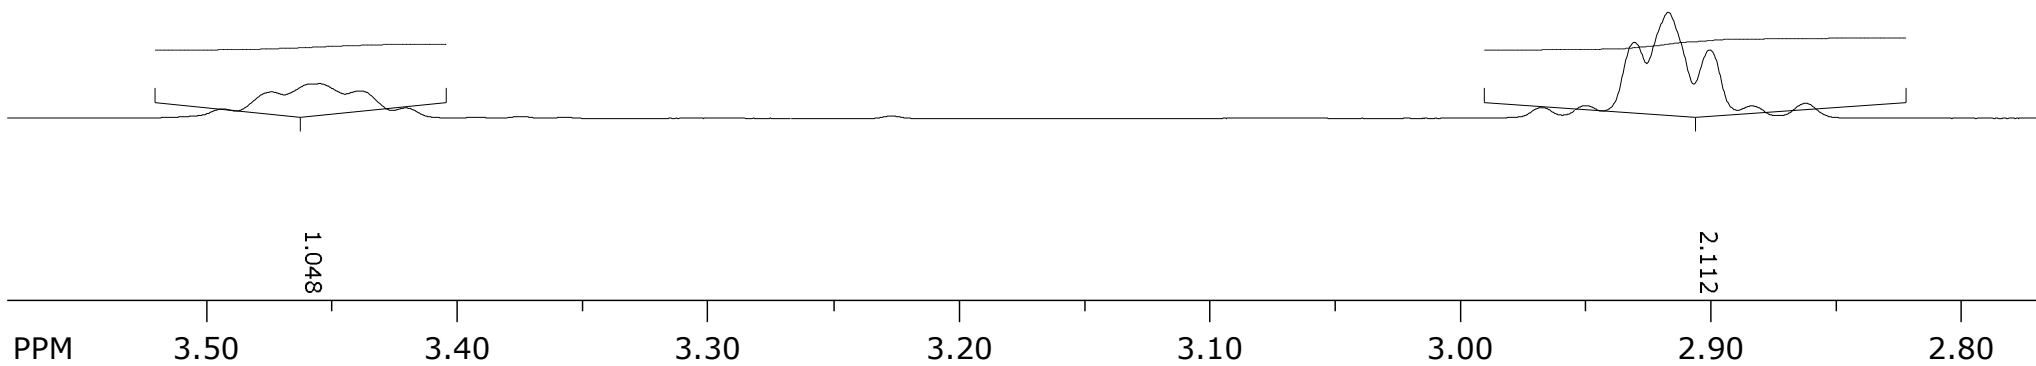

SpinWorks 4: SS 297 P  
PROTON CDCl3 /opt/topspin3.5pl2/nmrdata nmrsu 38

1.7400  
1.7511  
1.7631  
1.7734  
1.7865  
1.7950  
1.8099  
1.8241  
1.8534  
1.8812

1.2396  
1.2579  
1.2776  
1.2933  
1.3136  
1.3326  
1.3498

0.9024  
0.9205  
0.9387

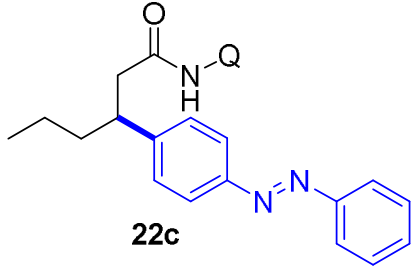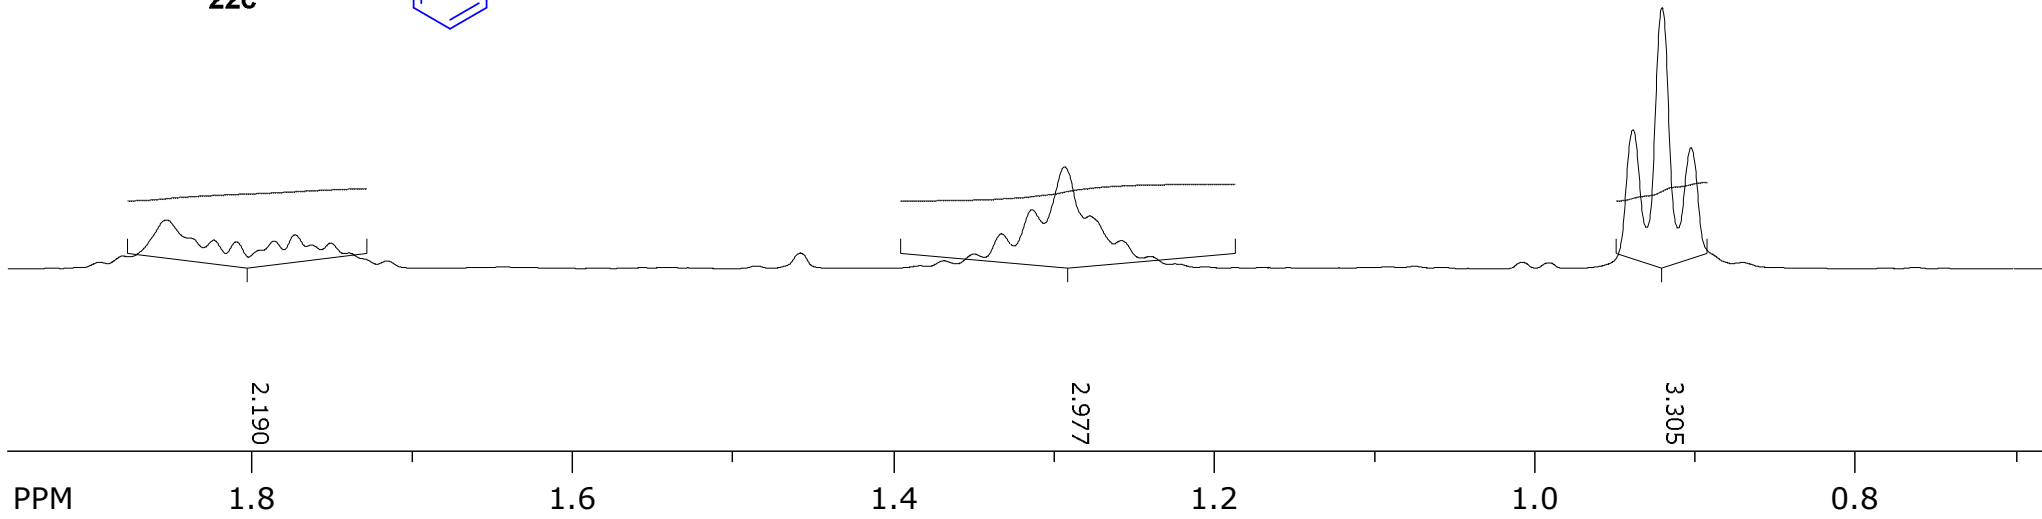

SpinWorks 4: SS 297 P  
C13CPD CDCl3 /opt/topspin3.5pl2/nmrdata nmrsu 38

170.096 —  
152.737 —  
151.438 —  
148.093 —  
147.905 —  
138.243 —  
136.304 —  
134.342 —  
130.808 —  
129.085 —  
128.352 —  
127.875 —  
127.363 —  
123.181 —  
122.756 —  
121.566 —  
121.502 —  
116.458 —  
76.785 —  
77.103 —  
77.420 —  
45.663 —  
42.342 —  
38.382 —  
20.618 —  
14.052 —

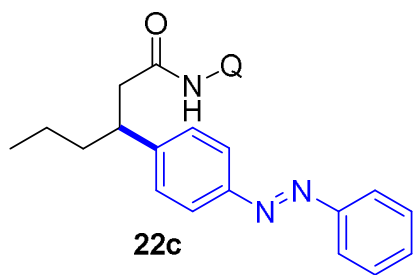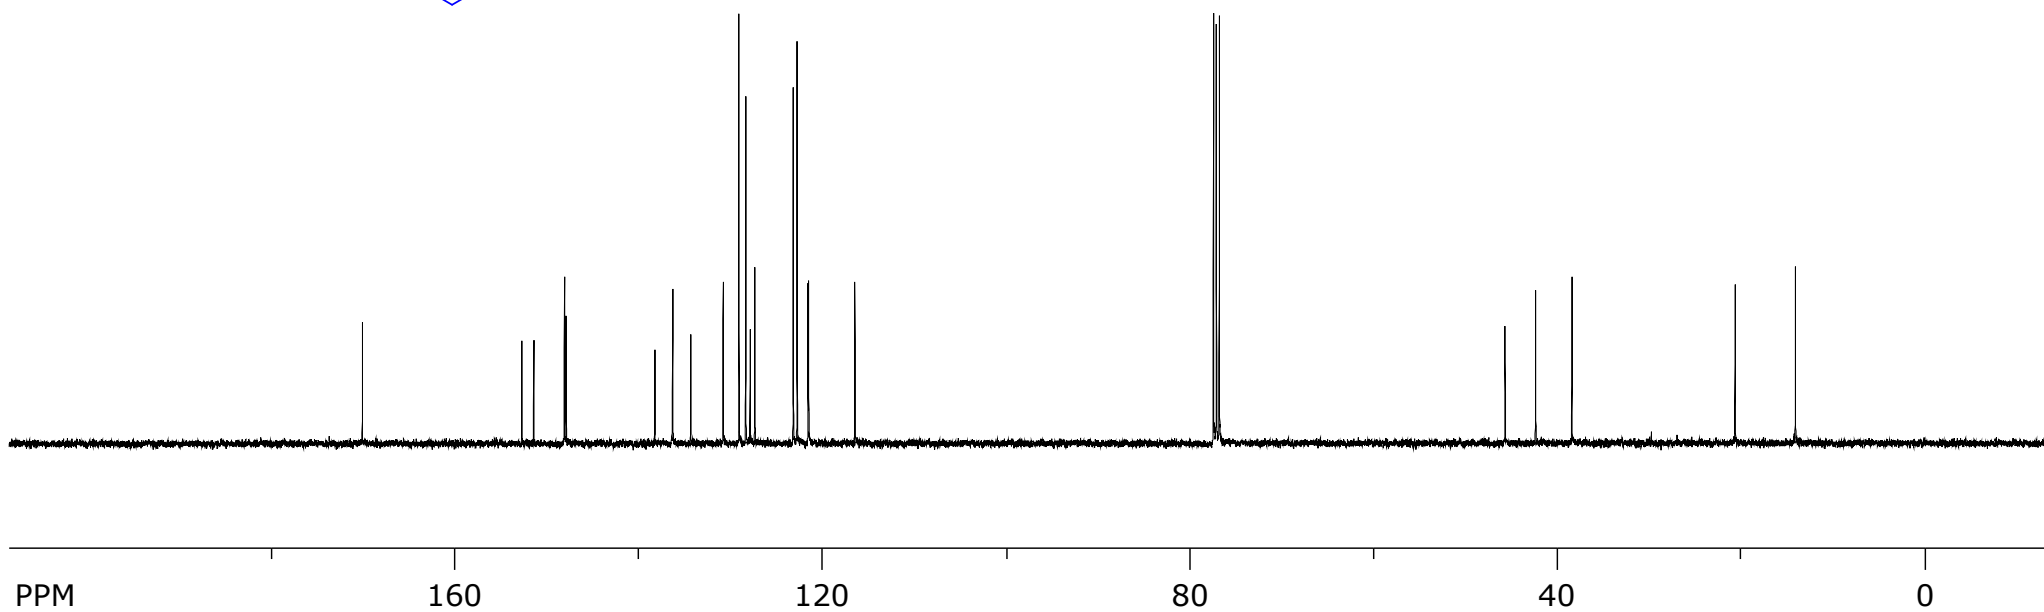



SpinWorks 4: SV030702  
1H\_8scan CDCl3 {D:\Spectra} nmr 26

SS-302

7.1554  
7.1509  
7.1464  
7.1419  
7.1374  
7.7902  
7.9785  
7.9817  
7.9951  
7.9982  
8.6183  
8.6216  
8.6267  
8.6403  
8.6427  
9.5929

0.7272  
0.7417  
0.7555  
1.0581  
1.0612  
1.0715  
1.0759  
1.0805  
1.0851  
1.0897  
1.0943  
1.0989  
1.1035  
1.1081  
1.1127  
1.1173  
1.1219  
1.1265  
1.1311  
1.1357  
1.1403  
1.1449  
1.1495  
1.1541  
1.1587  
1.1633  
1.1679  
1.1725  
1.1771  
1.1817  
1.1863  
1.1909  
1.1955  
1.2001  
1.2047  
1.2093  
1.2139  
1.2185  
1.2231  
1.2277  
1.2323  
1.2369  
1.2415  
1.2461  
1.2507  
1.2553  
1.2599  
1.2645  
1.2691  
1.2737  
1.2783  
1.2829  
1.2875  
1.2921  
1.2967  
1.3013  
1.3059  
1.3105  
1.3151  
1.3197  
1.3243  
1.3289  
1.3335  
1.3381  
1.3427  
1.3473  
1.3519  
1.3565  
1.3611  
1.3657  
1.3703  
1.3749  
1.3795  
1.3841  
1.3887  
1.3933  
1.3979  
1.4025  
1.4071  
1.4117  
1.4163  
1.4209  
1.4255  
1.4301  
1.4347  
1.4393  
1.4439  
1.4485  
1.4531  
1.4577  
1.4623  
1.4669  
1.4715  
1.4761  
1.4807  
1.4853  
1.4899  
1.4945  
1.4991  
1.5037  
1.5083  
1.5129  
1.5175  
1.5221  
1.5267  
1.5313  
1.5359  
1.5405  
1.5451  
1.5497  
1.5543  
1.5589  
1.5635  
1.5681  
1.5727  
1.5773  
1.5819  
1.5865  
1.5911  
1.5957  
1.6003  
1.6049  
1.6095  
1.6141  
1.6187  
1.6233  
1.6279  
1.6325  
1.6371  
1.6417  
1.6463  
1.6509  
1.6555  
1.6601  
1.6647  
1.6693  
1.6739  
1.6785  
1.6831  
1.6877  
1.6923  
1.6969  
1.7015  
1.7061  
1.7107  
1.7153  
1.7199  
1.7245  
1.7291  
1.7337  
1.7383  
1.7429  
1.7475  
1.7521  
1.7567  
1.7613  
1.7659  
1.7705  
1.7751  
1.7797  
1.7843  
1.7889  
1.7935  
1.7981  
1.8027  
1.8073  
1.8119  
1.8165  
1.8211  
1.8257  
1.8303  
1.8349  
1.8395  
1.8441  
1.8487  
1.8533  
1.8579  
1.8625  
1.8671  
1.8717  
1.8763  
1.8809  
1.8855  
1.8901  
1.8947  
1.8993  
1.9039  
1.9085  
1.9131  
1.9177  
1.9223  
1.9269  
1.9315  
1.9361  
1.9407  
1.9453  
1.9499  
1.9545  
1.9591  
1.9637  
1.9683  
1.9729  
1.9775  
1.9821  
1.9867  
1.9913  
1.9959  
2.0005  
2.0051  
2.0097  
2.0143  
2.0189  
2.0235  
2.0281  
2.0327  
2.0373  
2.0419  
2.0465  
2.0511  
2.0557  
2.0603  
2.0649  
2.0695  
2.0741  
2.0787  
2.0833  
2.0879  
2.0925  
2.0971  
2.1017  
2.1063  
2.1109  
2.1155  
2.1201  
2.1247  
2.1293  
2.1339  
2.1385  
2.1431  
2.1477  
2.1523  
2.1569  
2.1615  
2.1661  
2.1707  
2.1753  
2.1799  
2.1845  
2.1891  
2.1937  
2.1983  
2.2029  
2.2075  
2.2121  
2.2167  
2.2213  
2.2259  
2.2305  
2.2351  
2.2397  
2.2443  
2.2489  
2.2535  
2.2581  
2.2627  
2.2673  
2.2719  
2.2765  
2.2811  
2.2857  
2.2903  
2.2949  
2.3005  
2.3051  
2.3097  
2.3143  
2.3189  
2.3235  
2.3281  
2.3327  
2.3373  
2.3419  
2.3465  
2.3511  
2.3557  
2.3603  
2.3649  
2.3695  
2.3741  
2.3787  
2.3833  
2.3879  
2.3925  
2.3971  
2.4017  
2.4063  
2.4109  
2.4155  
2.4201  
2.4247  
2.4293  
2.4339  
2.4385  
2.4431  
2.4477  
2.4523  
2.4569  
2.4615  
2.4661  
2.4707  
2.4753  
2.4799  
2.4845  
2.4891  
2.4937  
2.4983  
2.5029  
2.5075  
2.5121  
2.5167  
2.5213  
2.5259  
2.5305  
2.5351  
2.5397  
2.5443  
2.5489  
2.5535  
2.5581  
2.5627  
2.5673  
2.5719  
2.5765  
2.5811  
2.5857  
2.5903  
2.5949  
2.5995  
2.6041  
2.6087  
2.6133  
2.6179  
2.6225  
2.6271  
2.6317  
2.6363  
2.6409  
2.6455  
2.6501  
2.6547  
2.6593  
2.6639  
2.6685  
2.6731  
2.6777  
2.6823  
2.6869  
2.6915  
2.6961  
2.7007  
2.7053  
2.7099  
2.7145  
2.7191  
2.7237  
2.7283  
2.7329  
2.7375  
2.7421  
2.7467  
2.7513  
2.7559  
2.7605  
2.7651  
2.7697  
2.7743  
2.7789  
2.7835  
2.7881  
2.7927  
2.7973  
2.8019  
2.8065  
2.8111  
2.8157  
2.8203  
2.8249  
2.8295  
2.8341  
2.8387  
2.8433  
2.8479  
2.8525  
2.8571  
2.8617  
2.8663  
2.8709  
2.8755  
2.8801  
2.8847  
2.8893  
2.8939  
2.8985  
2.9031  
2.9077  
2.9123  
2.9169  
2.9215  
2.9261  
2.9307  
2.9353  
2.9399  
2.9445  
2.9491  
2.9537  
2.9583  
2.9629  
2.9675  
2.9721  
2.9767  
2.9813  
2.9859  
2.9905  
2.9951  
3.0007  
3.0053  
3.0099  
3.0145  
3.0191  
3.0237  
3.0283  
3.0329  
3.0375  
3.0421  
3.0467  
3.0513  
3.0559  
3.0605  
3.0651  
3.0697  
3.0743  
3.0789  
3.0835  
3.0881  
3.0927  
3.0973  
3.1019  
3.1065  
3.1111  
3.1157  
3.1203  
3.1249  
3.1295  
3.1341  
3.1387  
3.1433  
3.1479  
3.1525  
3.1571  
3.1617  
3.1663  
3.1709  
3.1755  
3.1801  
3.1847  
3.1893  
3.1939  
3.1985  
3.2031  
3.2077  
3.2123  
3.2169  
3.2215  
3.2261  
3.2307  
3.2353  
3.2399  
3.2445  
3.2491  
3.2537  
3.2583  
3.2629  
3.2675  
3.2721  
3.2767  
3.2813  
3.2859  
3.2905  
3.2951  
3.2997  
3.3043  
3.3089  
3.3135  
3.3181  
3.3227  
3.3273  
3.3319  
3.3365  
3.3411  
3.3457  
3.3503  
3.3549  
3.3595  
3.3641  
3.3687  
3.3733  
3.3779  
3.3825  
3.3871  
3.3917  
3.3963  
3.4009  
3.4055  
3.4101  
3.4147  
3.4193  
3.4239  
3.4285  
3.4331  
3.4377  
3.4423  
3.4469  
3.4515  
3.4561  
3.4607  
3.4653  
3.4699  
3.4745  
3.4791  
3.4837  
3.4883  
3.4929  
3.4975  
3.5021  
3.5067  
3.5113  
3.5159  
3.5205  
3.5251  
3.5297  
3.5343  
3.5389  
3.5435  
3.5481  
3.5527  
3.5573  
3.5619  
3.5665  
3.5711  
3.5757  
3.5803  
3.5849  
3.5895  
3.5941  
3.5987  
3.6033  
3.6079  
3.6125  
3.6171  
3.6217  
3.6263  
3.6309  
3.6355  
3.6401  
3.6447  
3.6493  
3.6539  
3.6585  
3.6631  
3.6677  
3.6723  
3.6769  
3.6815  
3.6861  
3.6907  
3.6953  
3.6999  
3.7045  
3.7091  
3.7137  
3.7183  
3.7229  
3.7275  
3.7321  
3.7367  
3.7413  
3.7459  
3.7505  
3.7551  
3.7597  
3.7643  
3.7689  
3.7735  
3.7781  
3.7827  
3.7873  
3.7919  
3.7965  
3.8011  
3.8057  
3.8103  
3.8149  
3.8195  
3.8241  
3.8287  
3.8333  
3.8379  
3.8425  
3.8471  
3.8517  
3.8563  
3.8609  
3.8655  
3.8701  
3.8747  
3.8793  
3.8839  
3.8885  
3.8931  
3.8977  
3.9023  
3.9069  
3.9115  
3.9161  
3.9207  
3.9253  
3.9299  
3.9345  
3.9391  
3.9437  
3.9483  
3.9529  
3.9575  
3.9621  
3.9667  
3.9713  
3.9759  
3.9805  
3.9851  
3.9897  
3.9943  
3.9989  
4.0035  
4.0081  
4.0127  
4.0173  
4.0219  
4.0265  
4.0311  
4.0357  
4.0403  
4.0449  
4.0495  
4.0541  
4.0587  
4.0633  
4.0679  
4.0725  
4.0771  
4.0817  
4.0863  
4.0909  
4.0955  
4.1001  
4.1047  
4.1093  
4.1139  
4.1185  
4.1231  
4.1277  
4.1323  
4.1369  
4.1415  
4.1461  
4.1507  
4.1553  
4.1599  
4.1645  
4.1691  
4.1737  
4.1783  
4.1829  
4.1875  
4.1921  
4.1967  
4.2013  
4.2059  
4.2105  
4.2151  
4.2197  
4.2243  
4.2289  
4.2335  
4.2381  
4.2427  
4.2473  
4.2519  
4.2565  
4.2611  
4.2657  
4.2703  
4.2749  
4.2795  
4.2841  
4.2887  
4.2933  
4.2979  
4.3025  
4.3071  
4.3117  
4.3163  
4.3209  
4.3255  
4.3301  
4.3347  
4.3393  
4.3439  
4.3485  
4.3531  
4.3577  
4.3623  
4.3669  
4.3715  
4.3761  
4.3807  
4.3853  
4.3899  
4.3945  
4.3991  
4.4037  
4.4083  
4.4129  
4.4175  
4.4221  
4.4267  
4.4313  
4.4359  
4.4405  
4.4451  
4.4497  
4.4543  
4.4589  
4.4635  
4.4681  
4.4727  
4.4773  
4.4819  
4.4865  
4.4911  
4.4957  
4.5003  
4.5049  
4.5095  
4.5141  
4.5187  
4.5233  
4.5279  
4.5325  
4.5371  
4.5417  
4.5463  
4.5509  
4.5555  
4.5601  
4.5647  
4.5693  
4.5739  
4.5785  
4.5831  
4.5877  
4.5923  
4.5969  
4.6015  
4.6061  
4.6107  
4.6153  
4.6199  
4.6245  
4.6291  
4.6337  
4.6383  
4.6429  
4.6475  
4.6521  
4.6567  
4.6613  
4.6659  
4.6705  
4.6751  
4.6797  
4.6843  
4.6889  
4.6935  
4.6981  
4.7027  
4.7073  
4.7119  
4.7165  
4.7211  
4.7257  
4.7303  
4.7349  
4.7395  
4.7441  
4.7487  
4.7533  
4.7579  
4.7625  
4.7671  
4.7717  
4.7763  
4.7809  
4.7855  
4.7901  
4.7947  
4.7993  
4.8039  
4.8085  
4.8131  
4.8177  
4.8223  
4.8269  
4.8315  
4.8361  
4.8407  
4.8453  
4.8499  
4.8545  
4.8591  
4.8637  
4.8683  
4.8729  
4.8775  
4.8821  
4.8867  
4.8913  
4.8959  
4.9005  
4.9051  
4.9097  
4.9143  
4.9189  
4.9235  
4.9281  
4.9327  
4.9373  
4.9419  
4.9465  
4.9511  
4.9557  
4.9603  
4.9649  
4.9695  
4.9741  
4.9787  
4.9833  
4.9879  
4.9925  
4.9971  
5.0017  
5.0063  
5.0109  
5.0155  
5.0201  
5.0247  
5.0293  
5.0339  
5.0385  
5.0431  
5.0477  
5.0523  
5.0569  
5.0615  
5.0661  
5.0707  
5.0753  
5.0799  
5.0845  
5.0891  
5.0937  
5.0983  
5.1029  
5.1075  
5.1121  
5.1167  
5.1213  
5.1259  
5.1305  
5.1351  
5.1397  
5.1443  
5.1489  
5.1535  
5.1581  
5.1627  
5.1673  
5.1719  
5.1765  
5.1811  
5.1857  
5.1903  
5.1949  
5.1995  
5.2041  
5.2087  
5.2133  
5.2179  
5.2225  
5.2271  
5.2317  
5.2363  
5.2409  
5.2455  
5.2501  
5.2547  
5.2593  
5.2639  
5.2685  
5.2731  
5.2777  
5.2823  
5.2869  
5.2915  
5.2961  
5.3007  
5.3053  
5.3099  
5.3145  
5.3191  
5.3237  
5.3283  
5.3329  
5.3375  
5.3421  
5.3467  
5.3513  
5.3559  
5.3605  
5.3651  
5.3697  
5.3743  
5.3789  
5.3835  
5.3881  
5.3927  
5.3973  
5.4019  
5.4065  
5.4111  
5.4157  
5.4203  
5.4249  
5.4295  
5.4341  
5.4387  
5.4433  
5.4479  
5.4525  
5.4571  
5.4617  
5.4663  
5.4709  
5.4755  
5.4801  
5.4847  
5.4893  
5.4939  
5.4985  
5.5031  
5.5077  
5.5123  
5.5169  
5.5215  
5.5261  
5.5307  
5.5353  
5.5399  
5.5445  
5.5491  
5.5537  
5.5583  
5.5629  
5.5675  
5.5721  
5.5767  
5.5813  
5.5859  
5.5905  
5.5951  
5.5997  
5.6043  
5.6089  
5.6135  
5.6181  
5.6227  
5.6273  
5.6319  
5.6365  
5.6411  
5.6457  
5.6503  
5.6549  
5.6595  
5.6641  
5.6687  
5.6733  
5.6779  
5.6825  
5.6871  
5.6917  
5.6963  
5.7009  
5.7055  
5.7101  
5.7147  
5.7193  
5.7239  
5.7285  
5.7331  
5.7377  
5.7423  
5.7469  
5.7515  
5.7561  
5.7607  
5.7653  
5.7699  
5.7745  
5.7791  
5.7837  
5.7883  
5.7929  
5.7975  
5.8021  
5.8067  
5.8113  
5.8159  
5.8205  
5.8251  
5.8297  
5.8343  
5.8389  
5.8435  
5.8481  
5.8527  
5.8573  
5.8619  
5.8665  
5.8711  
5.8757  
5.8803  
5.8849  
5.8895  
5.8941  
5.8987  
5.9033  
5.9079  
5.9125  
5.9171  
5.9217  
5.9263  
5.9309  
5.9355  
5.9401  
5.9447  
5.9493  
5.9539  
5.9585  
5.9631  
5.9677  
5.9723  
5.9769  
5.9815  
5.9861  
5.9907  
5.9953  
6.0009  
6.0055  
6.0101  
6.0147  
6.0193  
6.0239  
6.0285  
6.0331  
6.0377  
6.0423  
6.0469  
6.0515  
6.0561  
6.0607  
6.0653  
6.0699  
6.0745  
6.0791  
6.0837  
6.0883  
6.0929  
6.0975  
6.1021  
6.1067  
6.1113  
6.1159  
6.1205  
6.1251  
6.1297  
6.1343  
6.1389  
6.1435  
6.1481  
6.1527  
6.1573  
6.1619  
6.1665  
6.1711  
6.1757  
6.1803  
6.1849  
6.1895  
6.1941  
6.1987  
6.2033  
6.2079  
6.2125  
6.2171  
6.2217  
6.2263  
6.2309  
6.2355  
6.2401  
6.2447  
6.2493  
6.2539  
6.2585  
6.2631  
6.2677  
6.2723  
6.2769  
6.2815  
6.2861  
6.2907  
6.2953  
6.2999  
6.3045  
6.3091  
6.3137  
6.3183  
6.3229  
6.3275  
6.3321  
6.3367  
6.3413  
6.3459  
6.3505  
6.3551  
6.3597  
6.3643  
6.3689  
6.3735  
6.3781  
6.3827  
6.3873  
6.3919  
6.3965  
6.4011  
6.4057  
6.4103  
6.4149  
6.4195  
6.4241  
6.4287  
6.4333  
6.4379  
6.4425  
6.4471  
6.4517  
6.4563  
6.4609  
6.4655  
6.4701  
6.4747  
6.4793  
6.4839  
6.4885  
6.4931  
6.4977  
6.5023  
6.5069  
6.5115  
6.5161  
6.5207  
6.5253  
6.5299  
6.5345  
6.5391  
6.5437  
6.5483  
6.5529  
6.5575  
6.5621  
6.5667  
6.5713  
6.5759  
6.5805  
6.5851  
6.5897  
6.5943  
6.5989  
6.6035  
6.6081  
6.6127  
6.6173  
6.6219  
6.6265  
6.6311  
6.6357  
6.6403  
6.6449  
6.6495  
6.6541  
6.6587  
6.6633  
6.6679  
6.6725  
6.6771  
6.6817  
6.6863  
6.6909  
6.6955  
6.7001  
6.7047  
6.7093  
6.7139  
6.7185  
6.7231  
6.7277  
6.7323  
6.7369  
6.7415  
6.7461  
6.7507  
6.7553  
6.7599  
6.7645  
6.7691  
6.7737  
6.7783  
6.7829  
6.7875  
6.7921  
6.7967  
6.8013  
6.8059  
6.8105  
6.8151  
6.8197  
6.8243  
6.8289  
6.8335  
6.8381  
6.8427  
6.8473  
6.8519  
6.8565  
6.8611  
6.8657  
6.8703  
6.8749  
6.8795  
6.8841  
6.8887  
6.8933  
6.8979  
6.9025  
6.9071  
6.9117  
6.9163  
6.9209  
6.9255  
6.9301  
6.9347  
6.9393  
6.9439  
6.9485  
6.9531  
6.9577  
6.9623  
6.9669  
6.9715  
6.9761  
6.9807  
6.9853  
6.9899  
6.9945  
6.9991  
7.0037  
7.0083  
7.0129  
7.0175  
7.0221  
7.0267  
7.0313  
7.0359  
7.0405  
7.0451  
7.0497  
7.0543  
7.0589  
7.0635  
7.0681  
7.0727  
7.0773  
7.0819  
7.0865  
7.0911  
7.0957  
7.1003  
7.1049  
7.1095  
7.1141  
7.1187  
7.1233  
7.1279  
7.1325  
7.1371  
7.1417  
7.1463  
7.1509  
7.1554

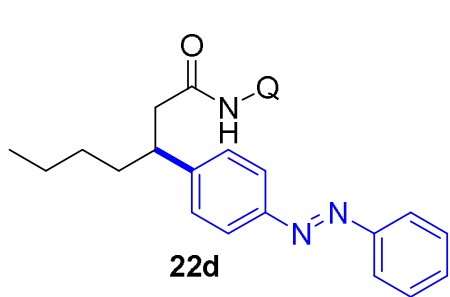

SpinWorks 4: SV030702  
1H\_8scan CDCl3 {D:\Spectra} nmr 26

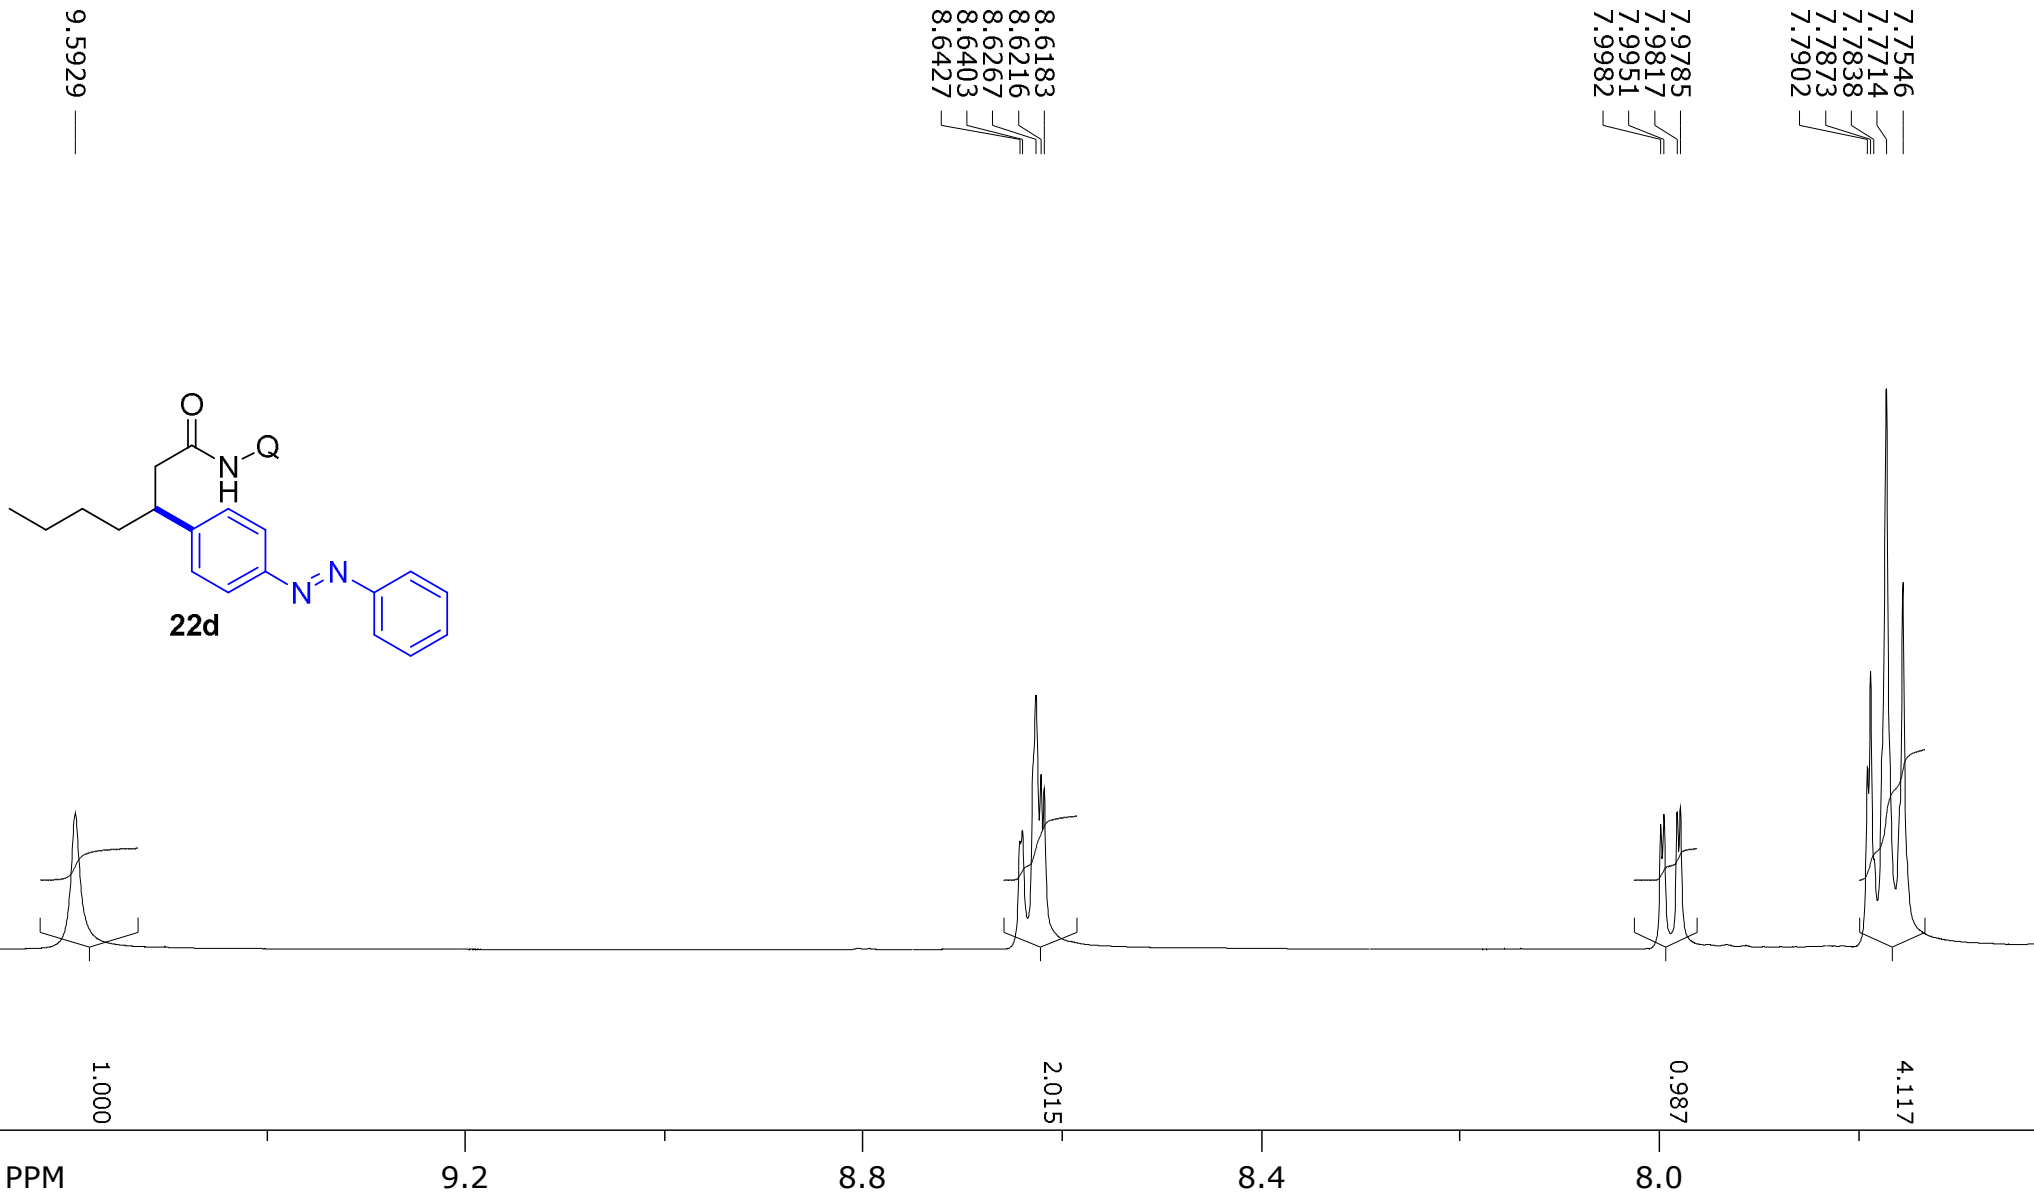

SpinWorks 4: SV030702  
1H\_8scan CDCl3 {D:\Spectra} nmr 26

7.4073 —  
7.4112 —  
7.4134 —  
7.3909 —  
7.3936 —  
7.3971 —  
7.3816 —  
7.3843 —  
7.3756 —  
7.3552 —  
7.3582 —  
7.3495 —  
7.3447 —  
7.3415 —  
7.3333 —  
7.3305 —  
7.2879 —  
7.2795 —  
7.2714 —  
7.2630 —

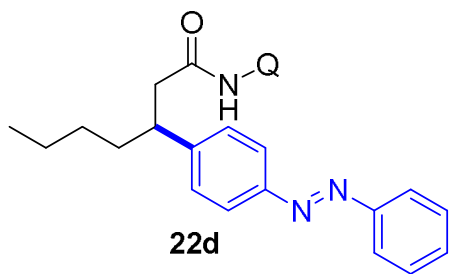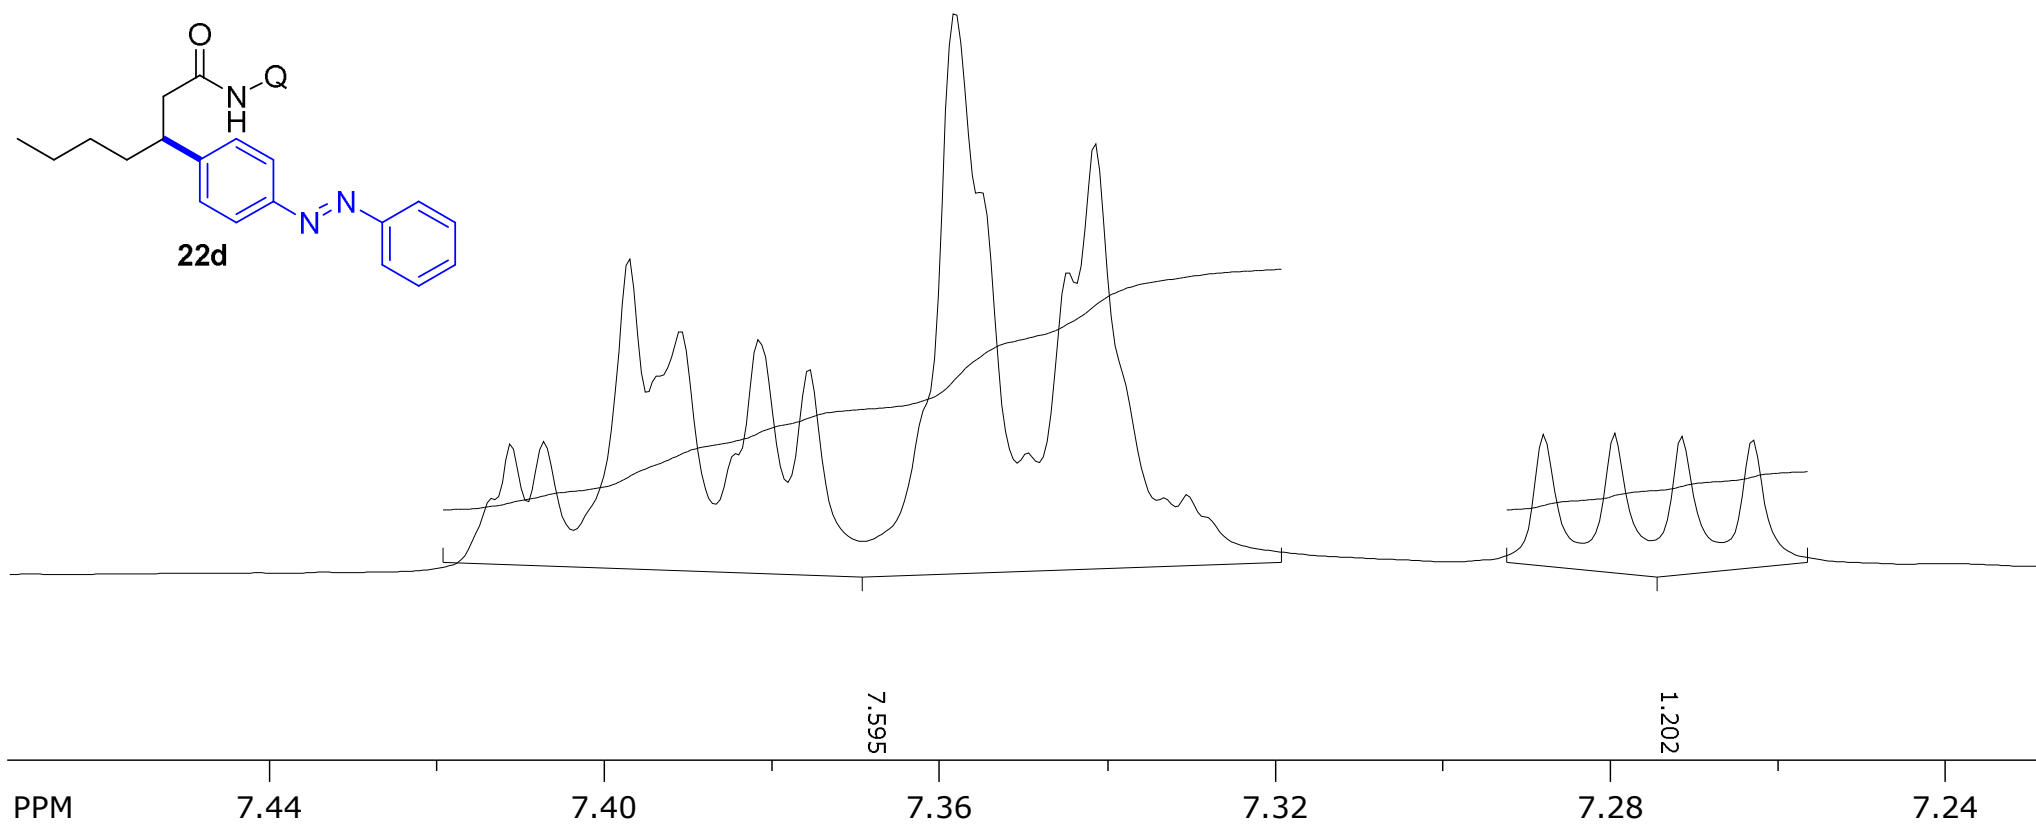

SpinWorks 4: SV030702  
1H\_8scan CDCl3 {D:\Spectra} nmr 26

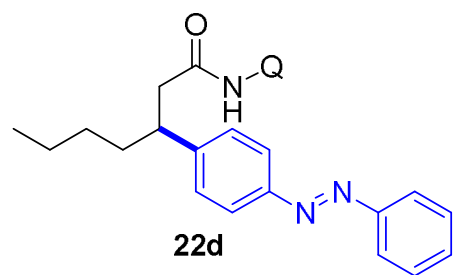

22d

3.2773 —  
3.2918 —  
3.2965 —  
3.3022 —  
3.3068 —  
3.3107 —  
3.3171 —  
3.3211 —

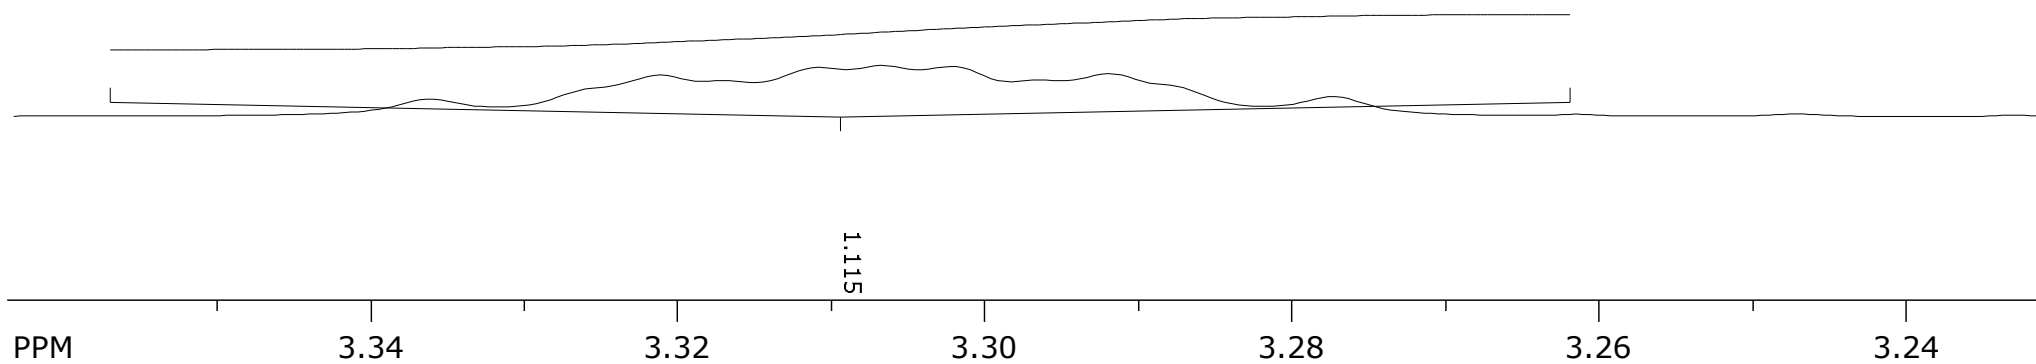

PPM

3.34

3.32

3.30

3.28

3.26

3.24

SpinWorks 4: SV030702  
1H\_8scan CDCl3 {D:\Spectra} nmr 26

2.7436 —  
2.7594 —  
2.7729 —  
2.7889 —  
2.7918 —  
2.8059 —  
2.8214 —  
2.8352 —

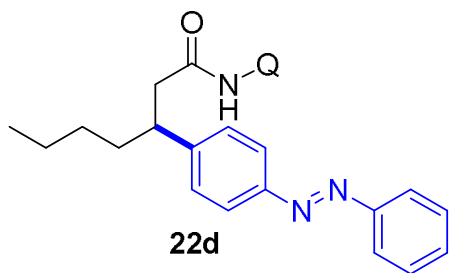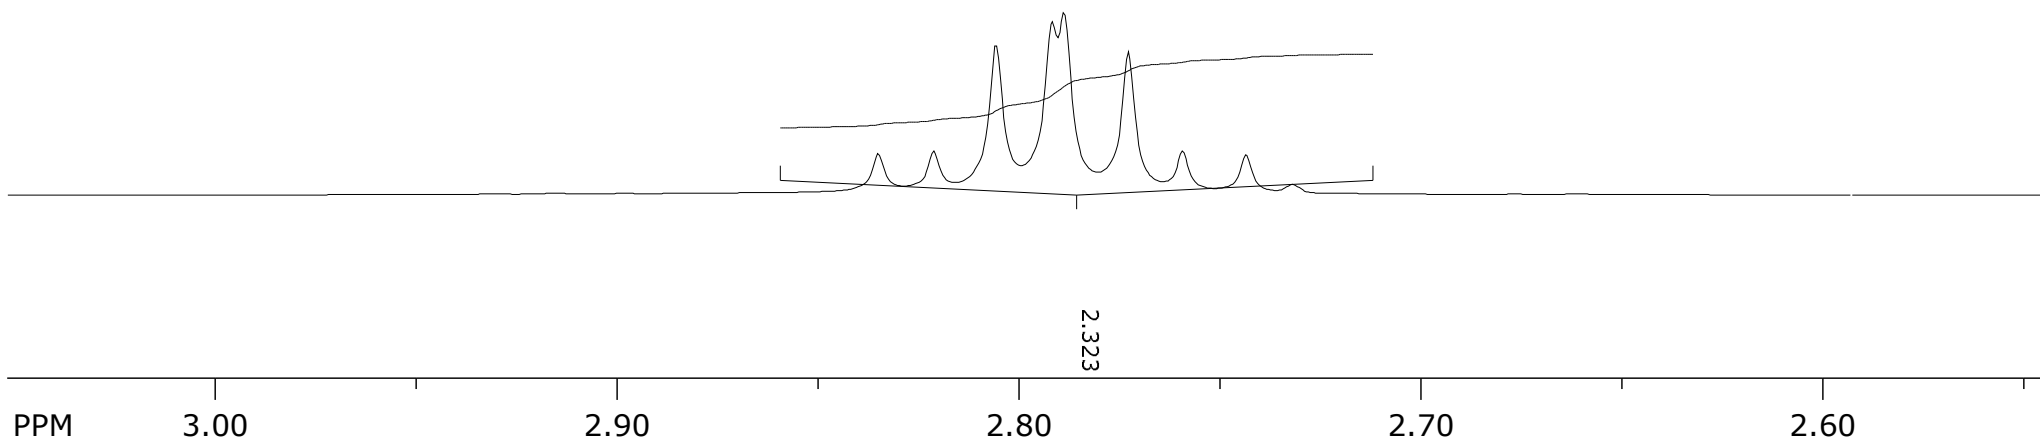

SpinWorks 4: SV030702  
1H\_8scan CDCl3 {D:\Spectra} nmr 26

1.7769 —  
1.7663 —  
1.7600 —  
1.7563 —  
1.7500 —  
1.7396 —  
1.7293 —  
1.7192 —  
1.7076 —  
1.6833 —  
1.6728 —  
1.6638 —  
1.6539 —  
1.6446 —  
1.6365 —  
1.6270 —

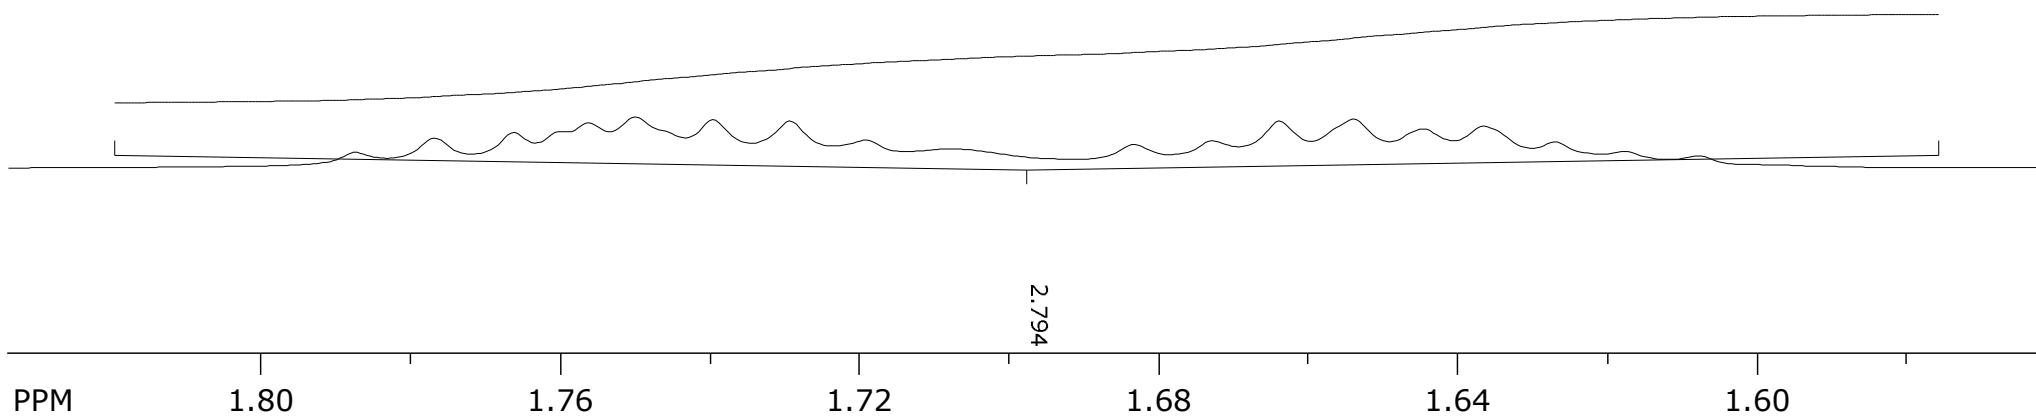

SpinWorks 4: SV030702  
1H\_8scan CDCl3 {D:\Spectra} nmr 26

1.0581  
1.0612  
1.0715  
1.0759  
1.0805  
1.0901  
1.0965  
1.1000  
1.1073  
1.1103  
1.1152  
1.1199  
1.1321  
1.1389  
1.1493  
1.1540  
1.1642  
1.1795  
1.1819  
1.1934  
1.2073  
1.2093  
1.2273  
1.2349  
1.2416  
1.2454  
1.2543  
1.2600

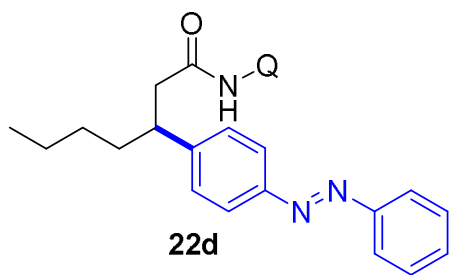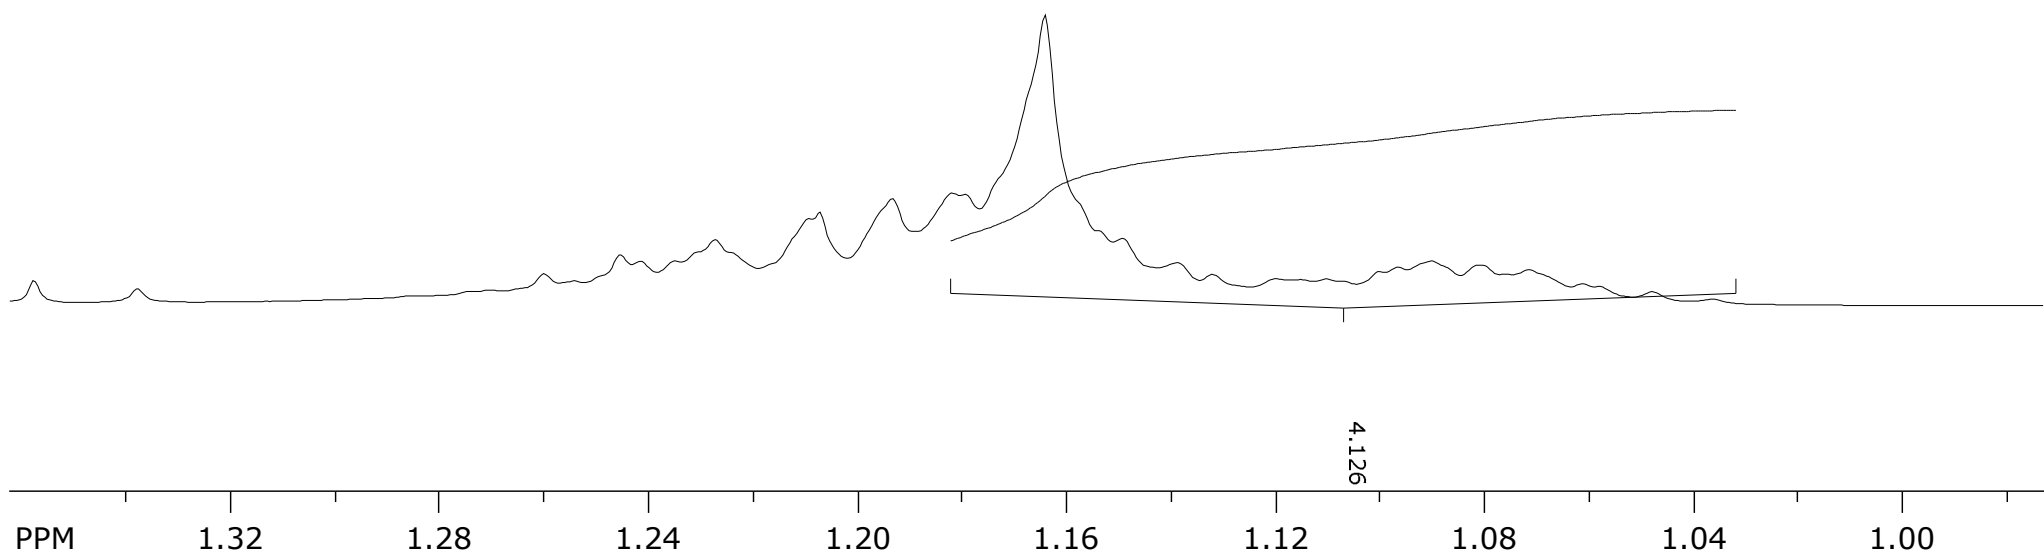

SpinWorks 4: SV030702  
1H\_8scan CDCl3 {D:\Spectra} nmr 26

0.7555

0.7417

0.7272

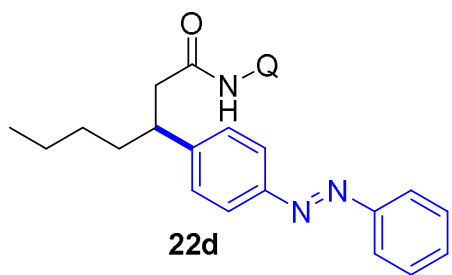

22d

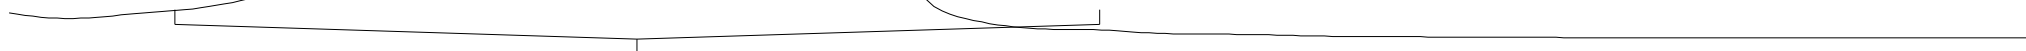

3.161

PPM

0.76

0.74

0.72

0.70

0.68



SpinWorks 4: SV030702  
C13CPD CDCl3 {D:\Spectra} nmr 26

SS-302

169.991 —

116.381  
121.390  
121.460  
122.663  
123.093  
127.274  
127.787  
128.258  
128.988  
130.703  
134.265  
136.200  
138.167  
147.863  
147.990  
151.360  
152.664

76.749  
77.003  
77.258

42.482  
45.593  
35.857  
29.559  
22.575  
13.939

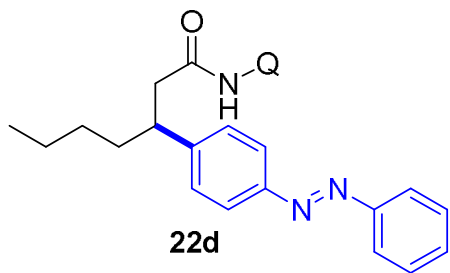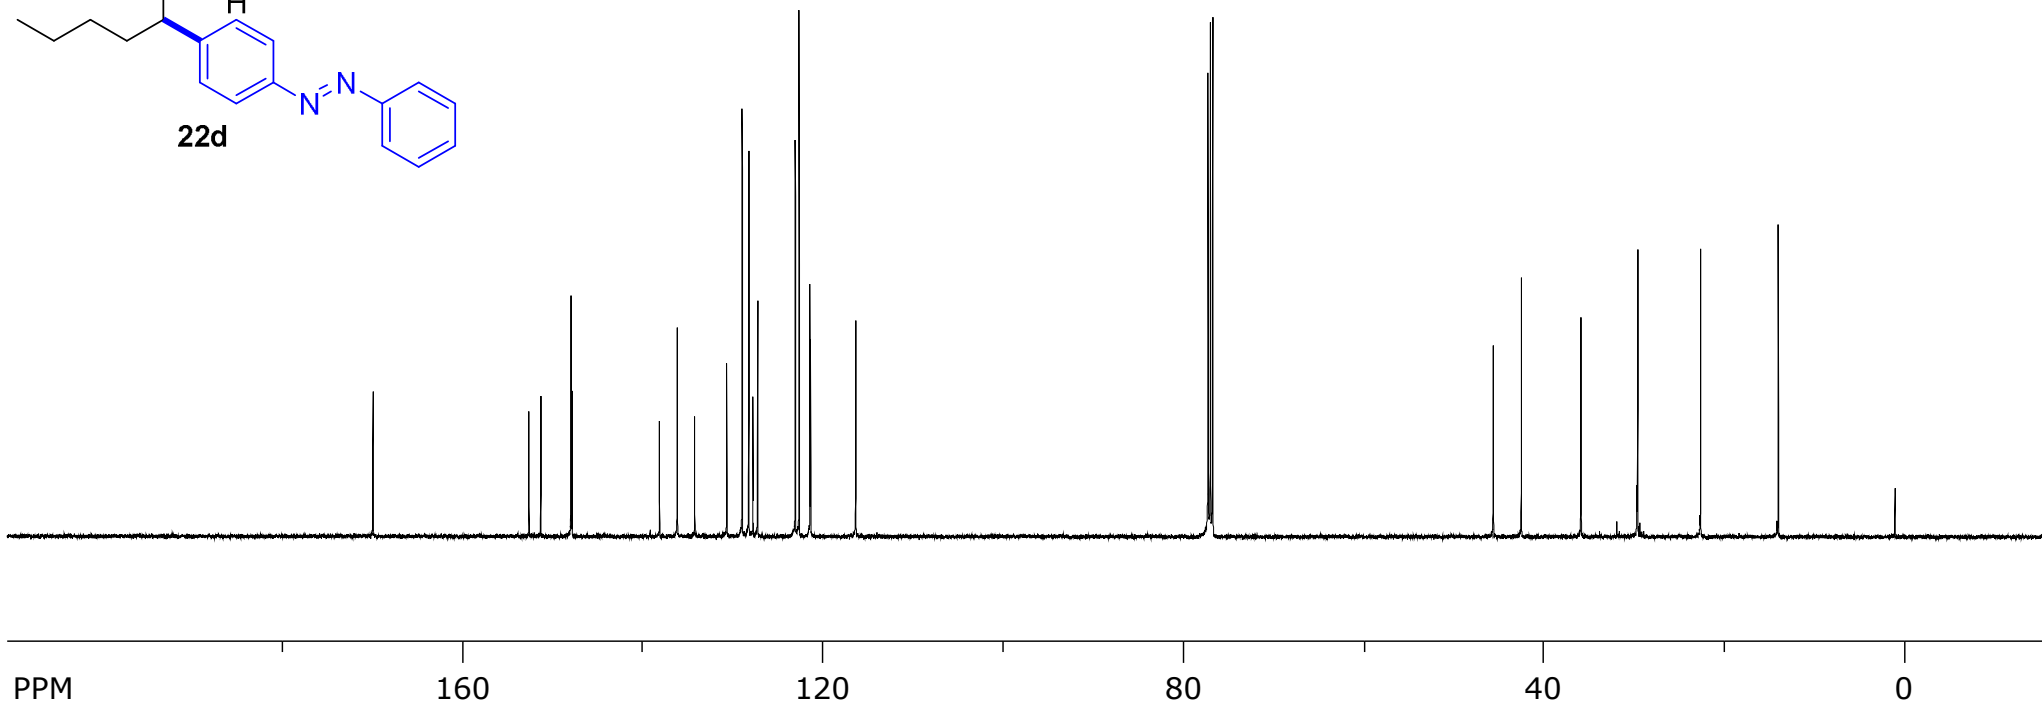

PPM

160

120

80

40

0

SpinWorks 4: SV030704  
1H\_8scan CDCl3 {D:\Spectra} nmr 28

SS-299

9.5882  
8.6381  
8.6230  
8.6184  
8.6151  
8.6099  
8.6067  
7.9806  
7.9774  
7.9699  
7.7809  
7.1451  
7.1400

1.9984  
1.9984  
1.9984  
1.9984  
1.6255  
1.6169  
1.5979  
1.1587  
1.1465  
1.1358  
1.10997  
0.7679  
0.7542  
0.7398

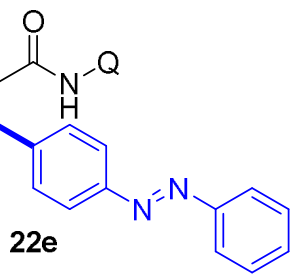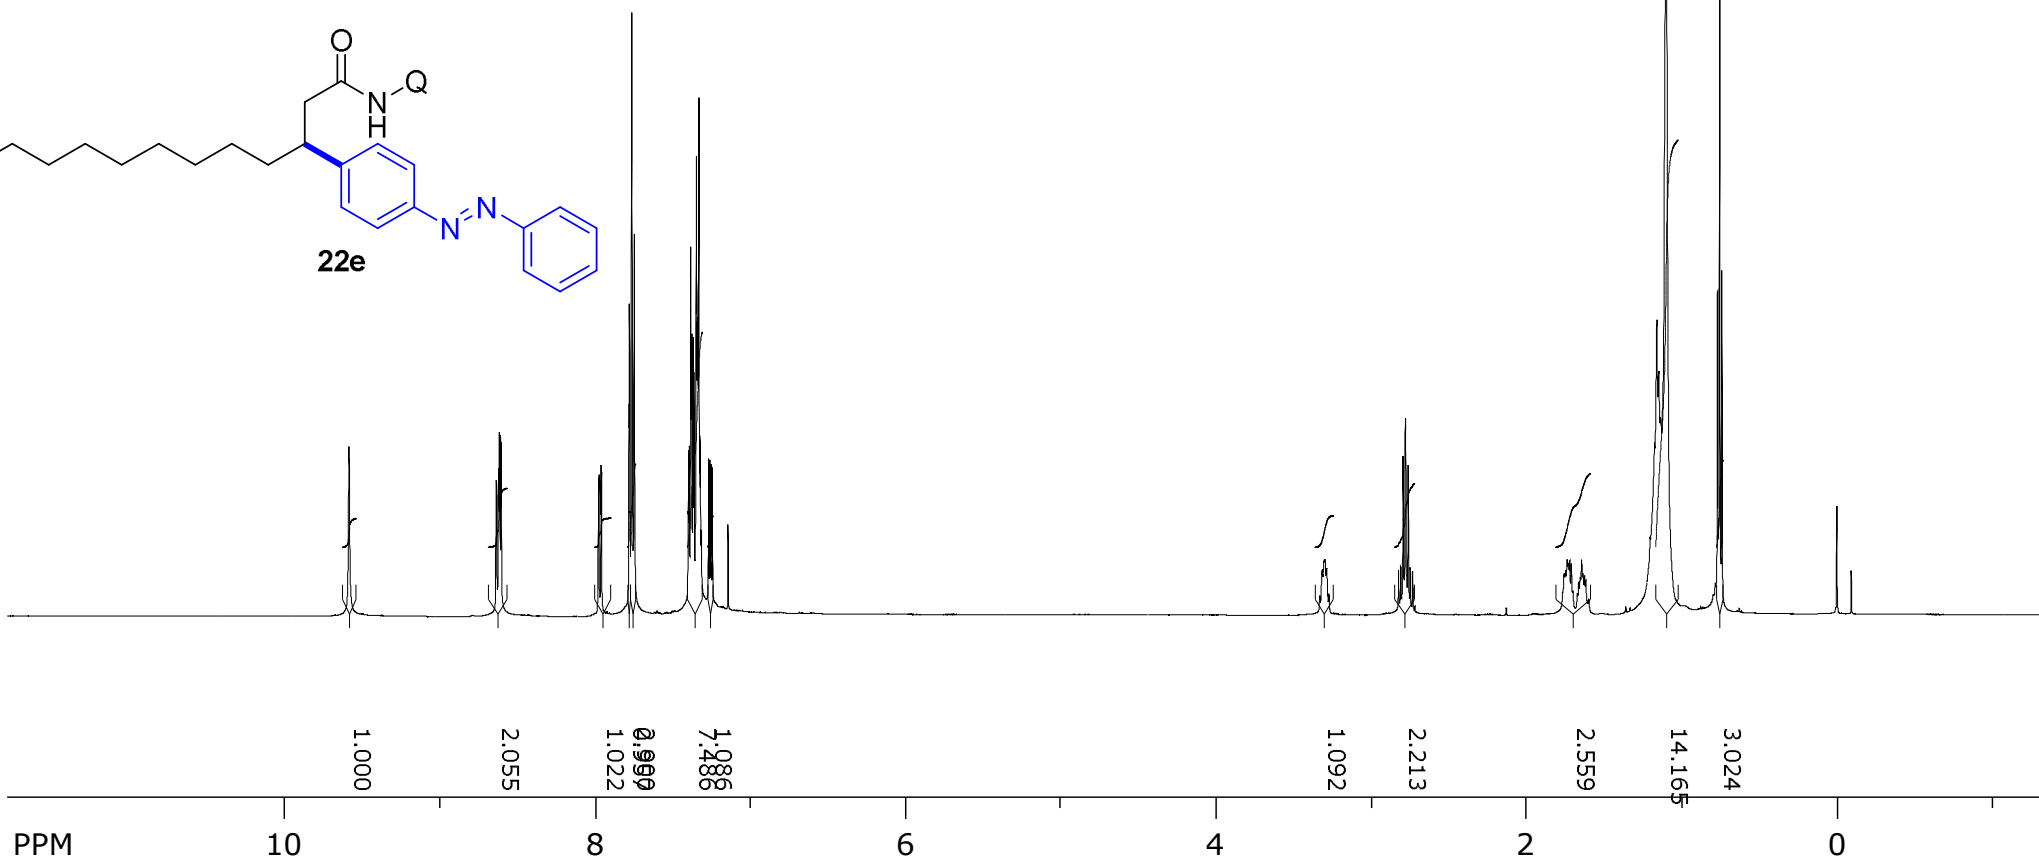

SpinWorks 4: SV030704  
1H\_8scan CDCl3 {D:\Spectra} nmr 28

9.5882

8.6067  
8.6099  
8.6151  
8.6184  
8.6230  
8.6250  
8.6381

7.9609  
7.9641  
7.9774  
7.9806

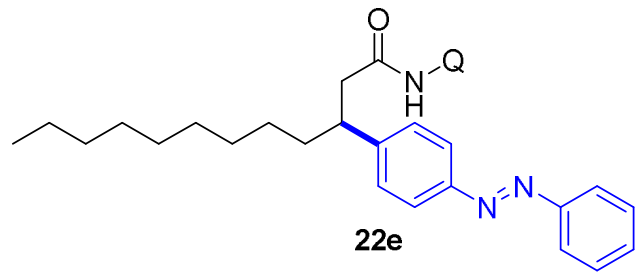

22e

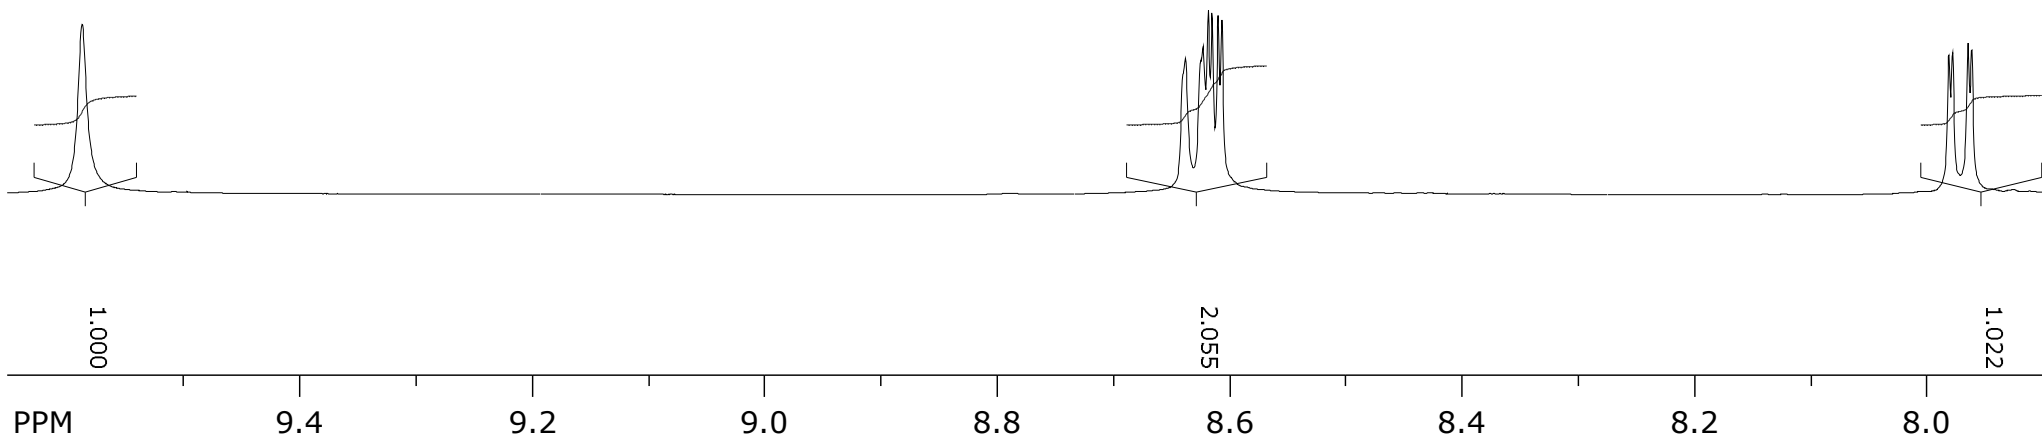

SpinWorks 4: SV030704  
1H\_8scan CDCl3 {D:\Spectra} nmr 28

7.7835 —  
7.7807 —  
7.7768 —  
7.7701 —  
7.7663 —  
7.7534 —  
7.7496 —  
7.7444 —

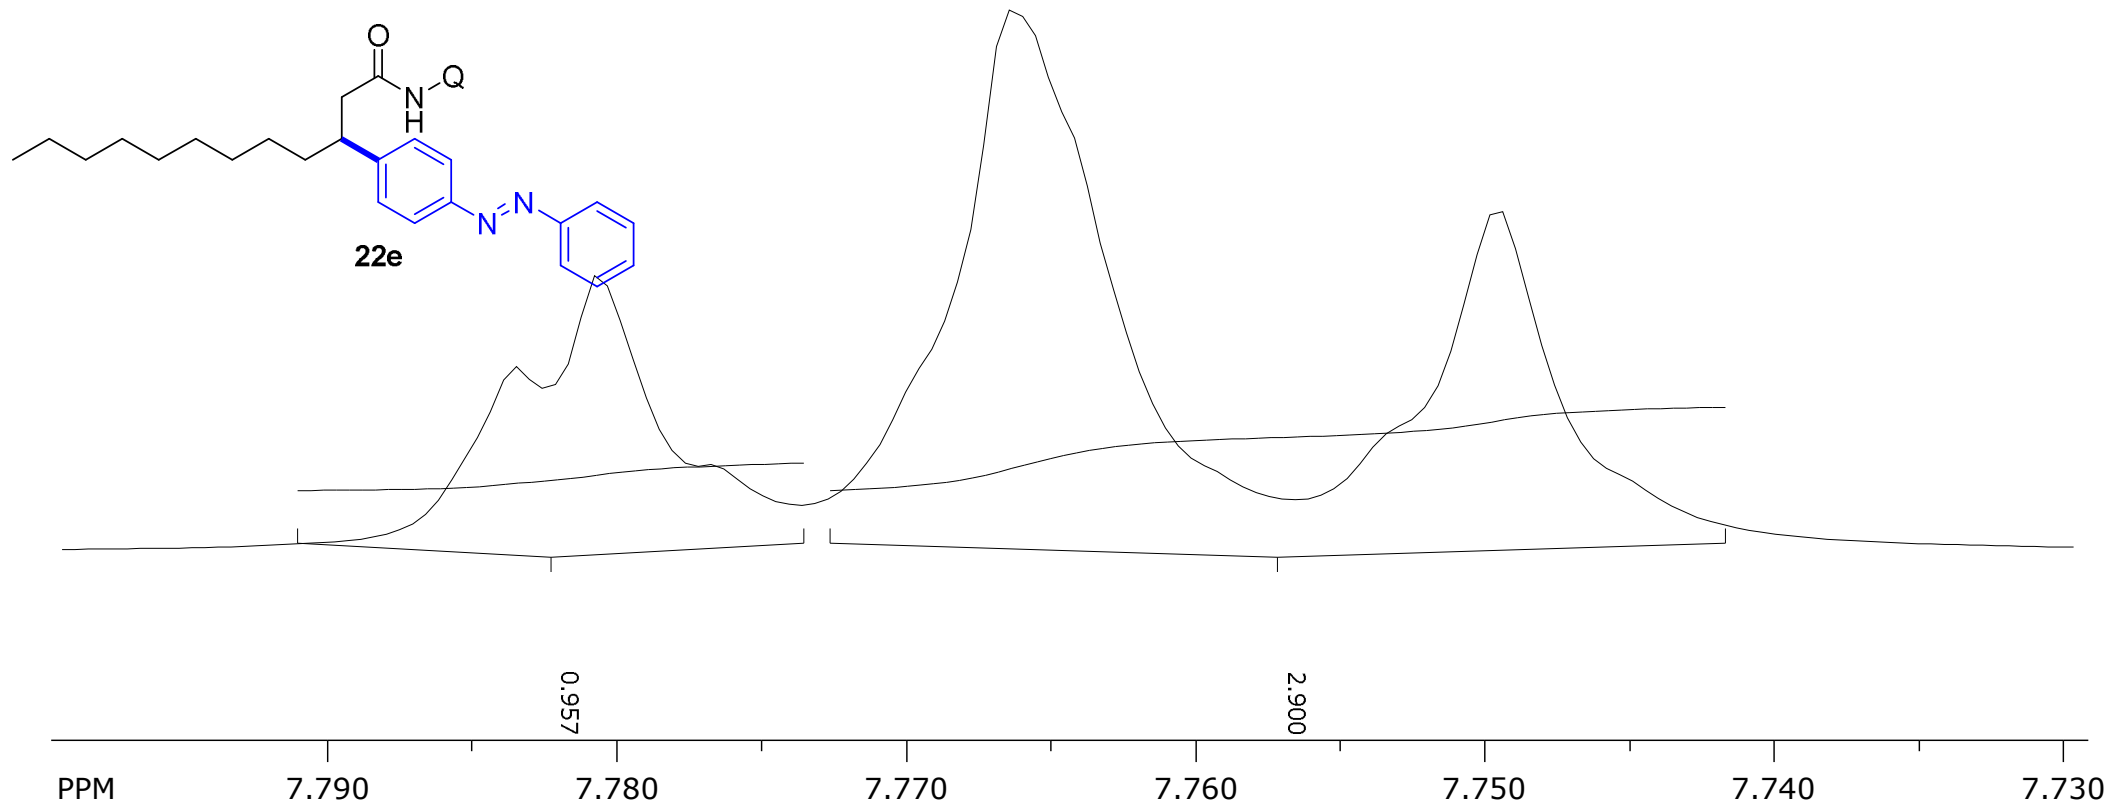

SpinWorks 4: SV030704

1H\_8scan CDCl3 {D:\Spectra} nmr 28

7.3957 —  
7.3995 —  
7.4017 —  
7.3795 —  
7.3818 —  
7.3854 —  
7.3700 —  
7.3728 —  
7.3641 —  
7.3500 —  
7.3469 —  
7.3428 —  
7.3371 —  
7.3331 —  
7.3233 —  
7.3264 —  
7.3180 —  
7.3157 —  
7.2708 —  
7.2623 —  
7.2543 —  
7.2458 —

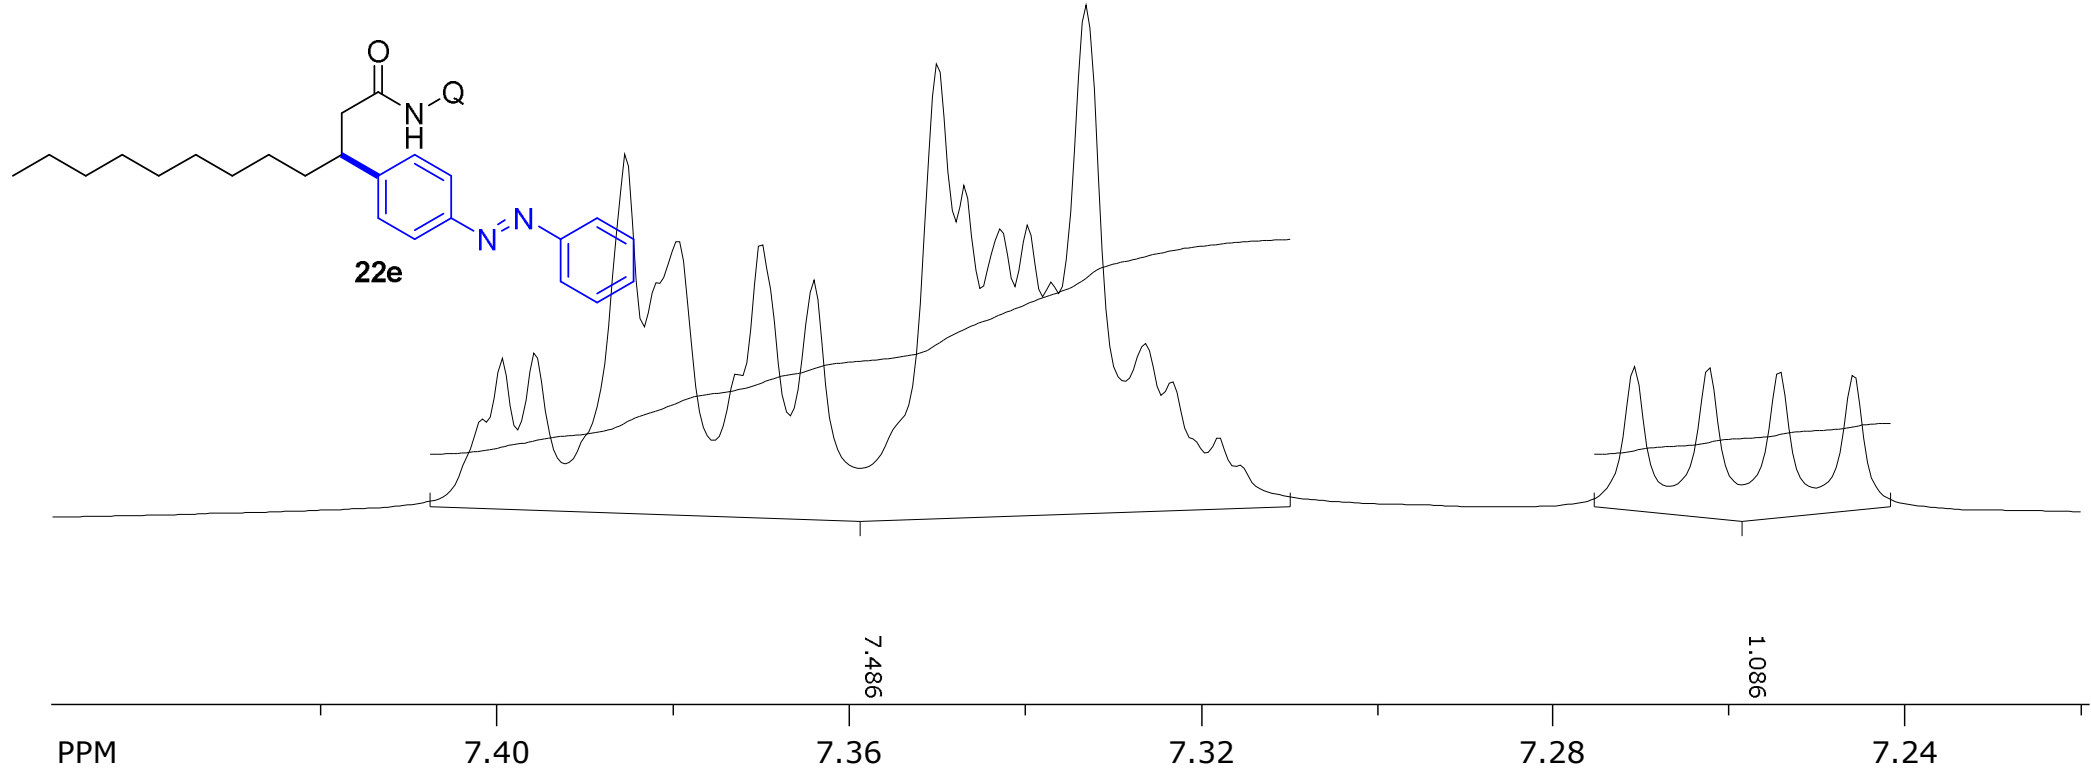

SpinWorks 4: SV030704  
1H\_8scan CDCl3 {D:\Spectra} nmr 28

3.2726  
3.2872  
3.2912  
3.2977  
3.3020  
3.3056  
3.3163  
3.3314

2.7324  
2.7482  
2.7617  
2.7778  
2.7801  
2.7943  
2.8098  
2.8237

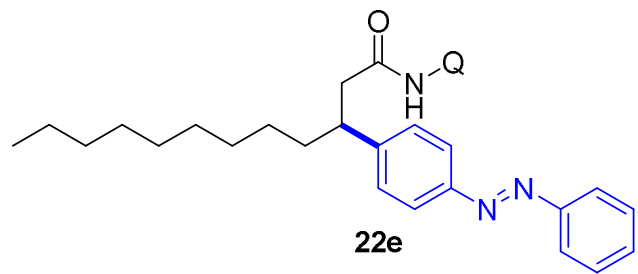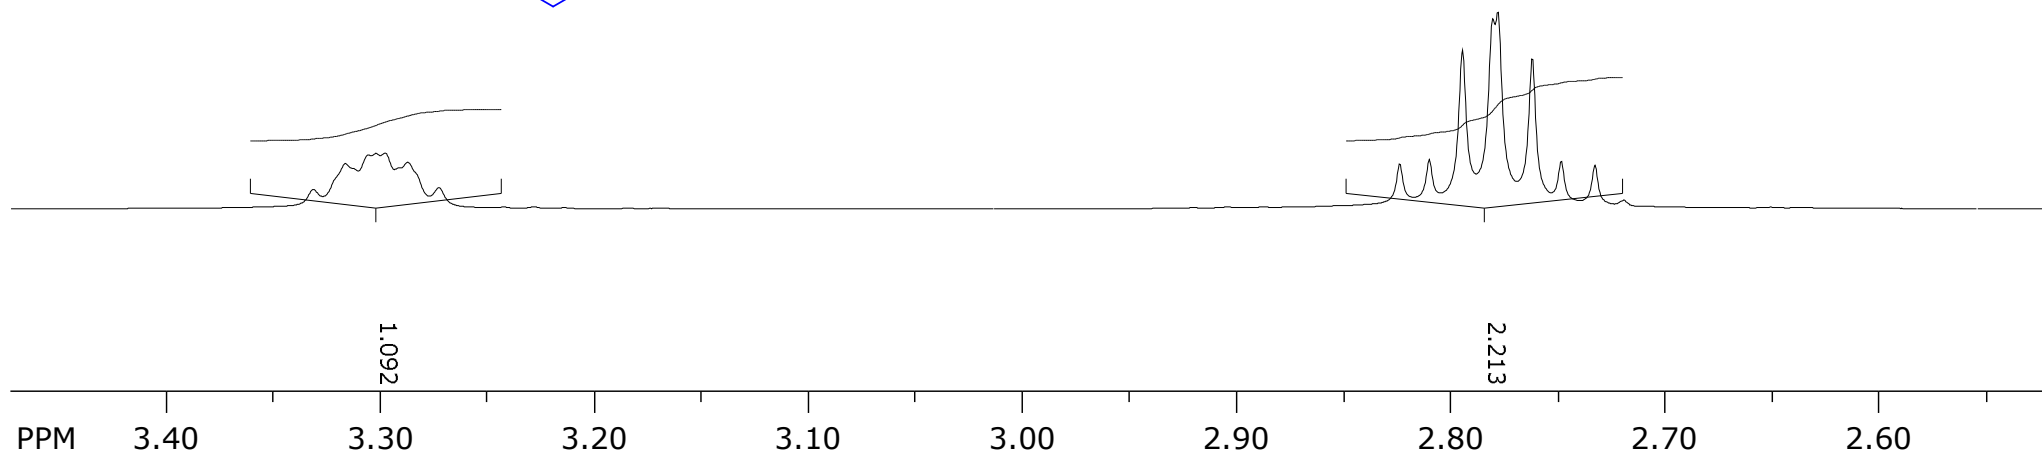

SpinWorks 4: SV030704  
1H\_8scan CDCl3 {D:\Spectra} nmr 28

1.5979  
1.6169  
1.6255  
1.6362  
1.6436  
1.6523  
1.6624  
1.6714  
1.7001  
1.7102  
1.7206  
1.7305  
1.7368  
1.7473  
1.7563

1.0997  
1.1358  
1.1465  
1.1587

0.7398  
0.7542  
0.7679

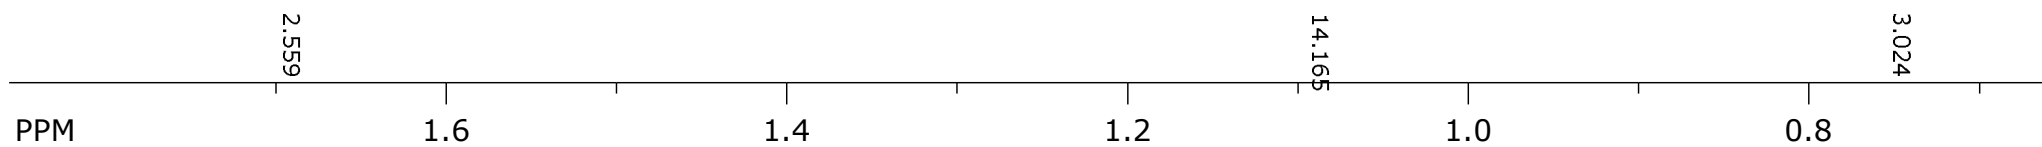

SpinWorks 4: SV030704  
C13CPD CDCl3 {D:\Spectra} nmr 28  
SS-299

170.003

152.672  
151.358  
147.986  
147.886  
138.176  
136.196  
134.278  
130.703  
128.986  
128.259  
127.791  
127.276  
123.103  
122.669  
121.455  
121.392  
116.390

77.274  
77.020  
76.765

45.602  
42.513

36.151  
31.808  
29.497  
29.474  
29.445  
29.221  
27.378  
22.616  
14.077



22e

PPM

160

120

80

40

0



SpinWorks 4: SV070701  
 1H\_8scan CDCl3 {D:\Spectra} nmr 27

SS-300

|        |        |        |        |        |        |        |        |        |        |        |        |        |        |        |        |        |        |        |        |        |
|--------|--------|--------|--------|--------|--------|--------|--------|--------|--------|--------|--------|--------|--------|--------|--------|--------|--------|--------|--------|--------|
| 9.8253 | 8.6672 | 8.6613 | 8.6540 | 8.1104 | 8.0950 | 7.7810 | 7.7781 | 7.7739 | 7.7639 | 7.1638 | 2.8092 | 2.0220 | 1.9990 | 1.1781 | 1.1661 | 1.1429 | 1.1110 | 0.7923 | 0.7786 | 0.7644 |
|--------|--------|--------|--------|--------|--------|--------|--------|--------|--------|--------|--------|--------|--------|--------|--------|--------|--------|--------|--------|--------|

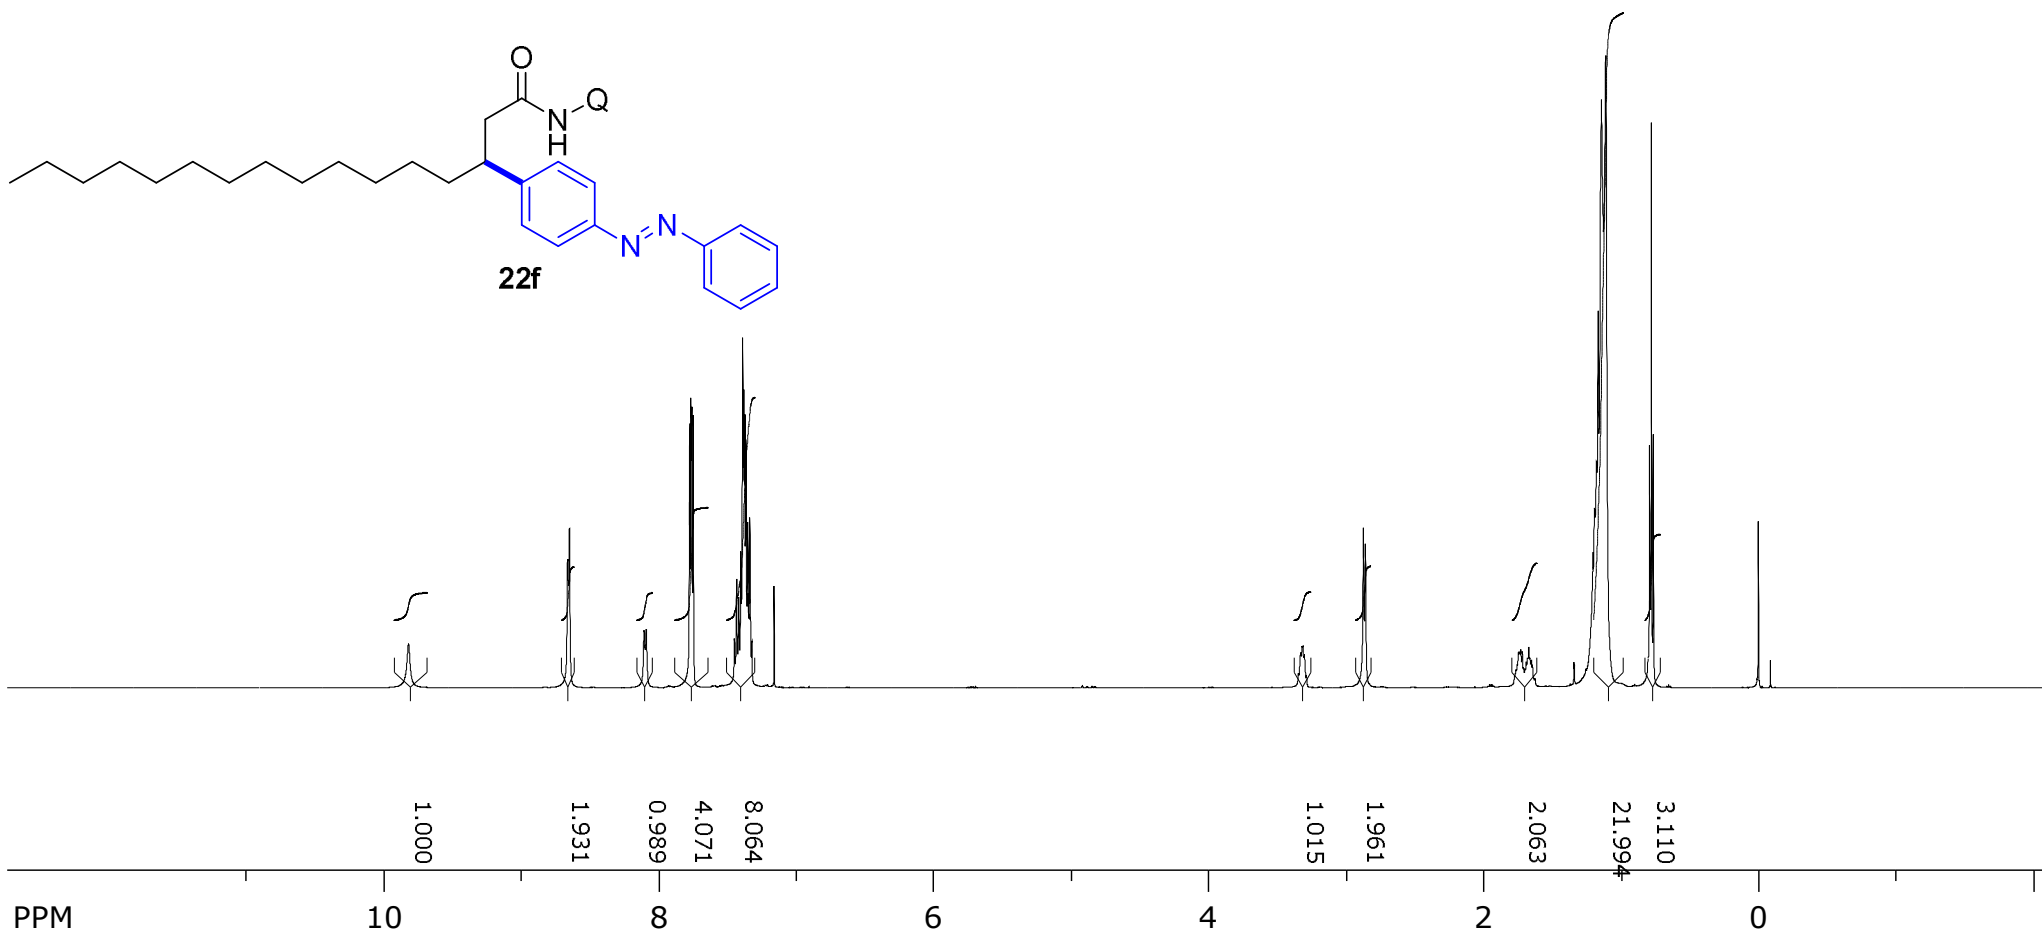

SpinWorks 4: SV070701  
1H\_8scan CDCl3 {D:\Spectra} nmr 27

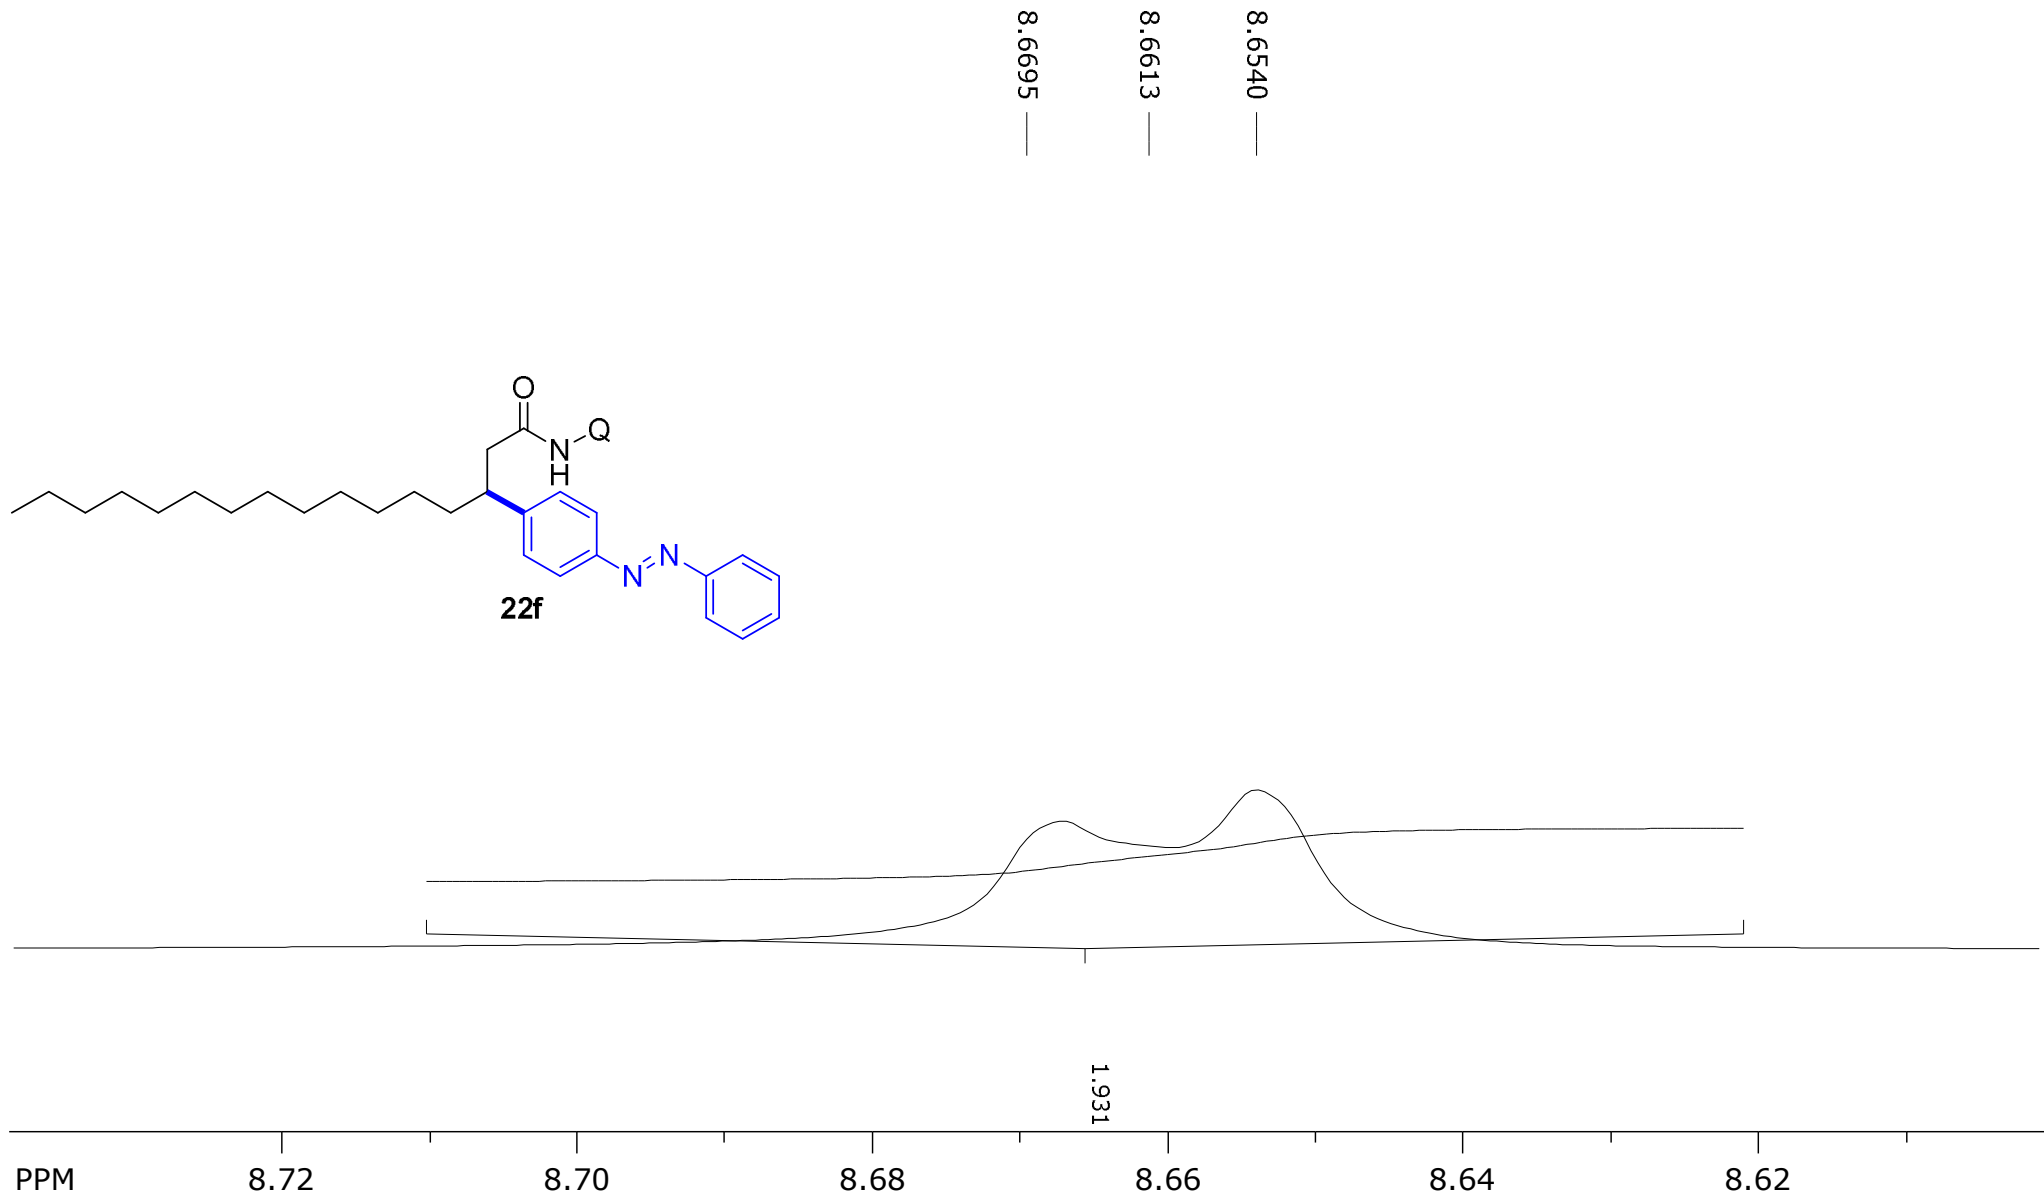

SpinWorks 4: SV070701  
1H\_8scan CDCl3 {D:\Spectra} nmr 27

8.0950 —  
8.1104 —

7.7530 —  
7.7640 —  
7.7676 —  
7.7695 —  
7.7739 —  
7.7781 —  
7.7810 —

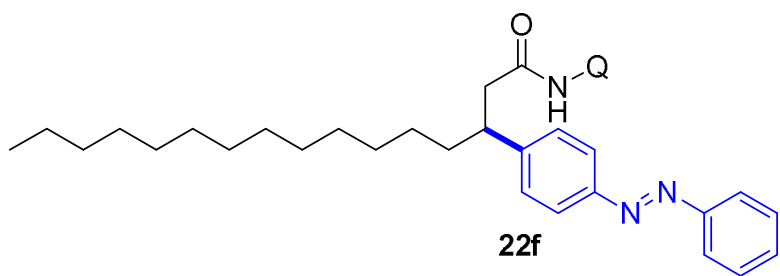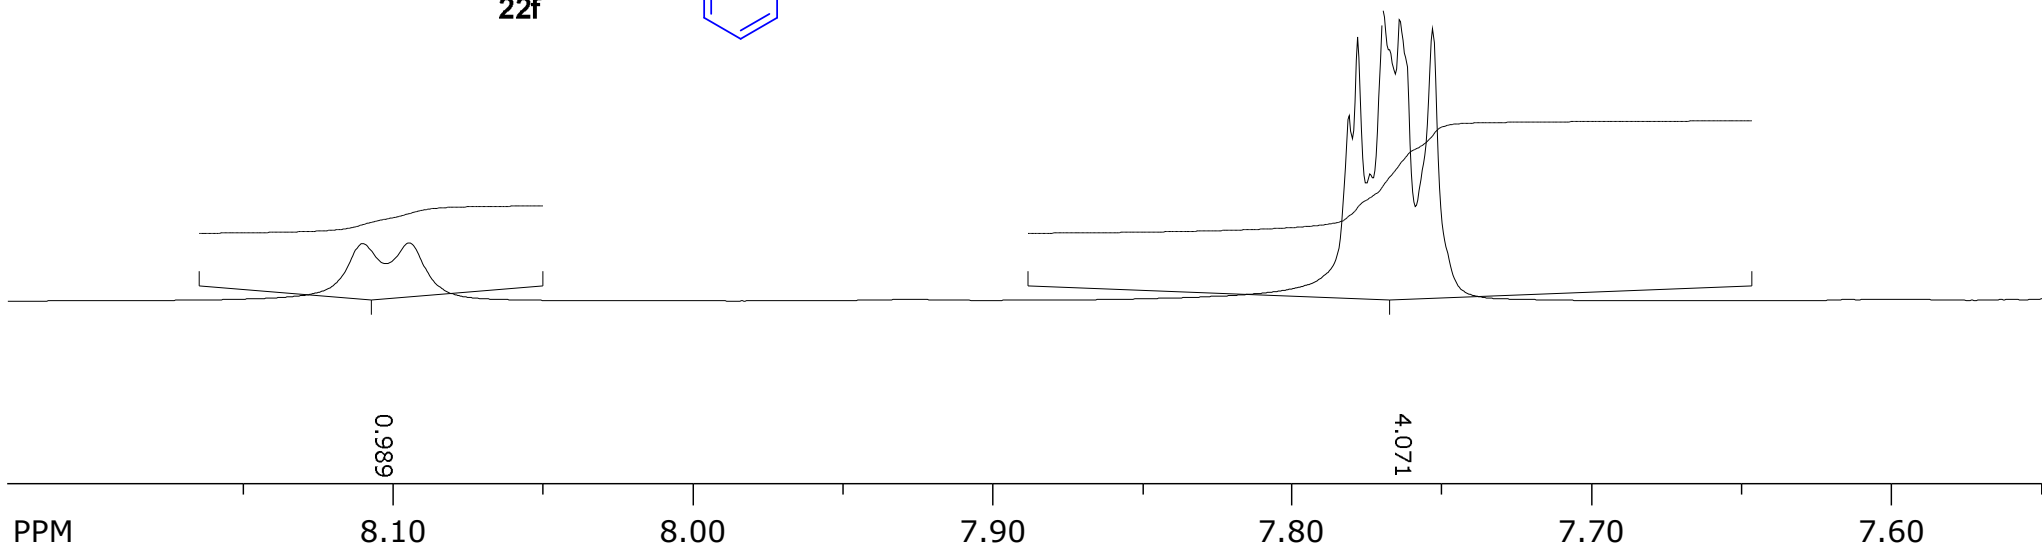

SpinWorks 4: SV070701  
1H\_8scan CDCl3 {D:\Spectra} nmr 27

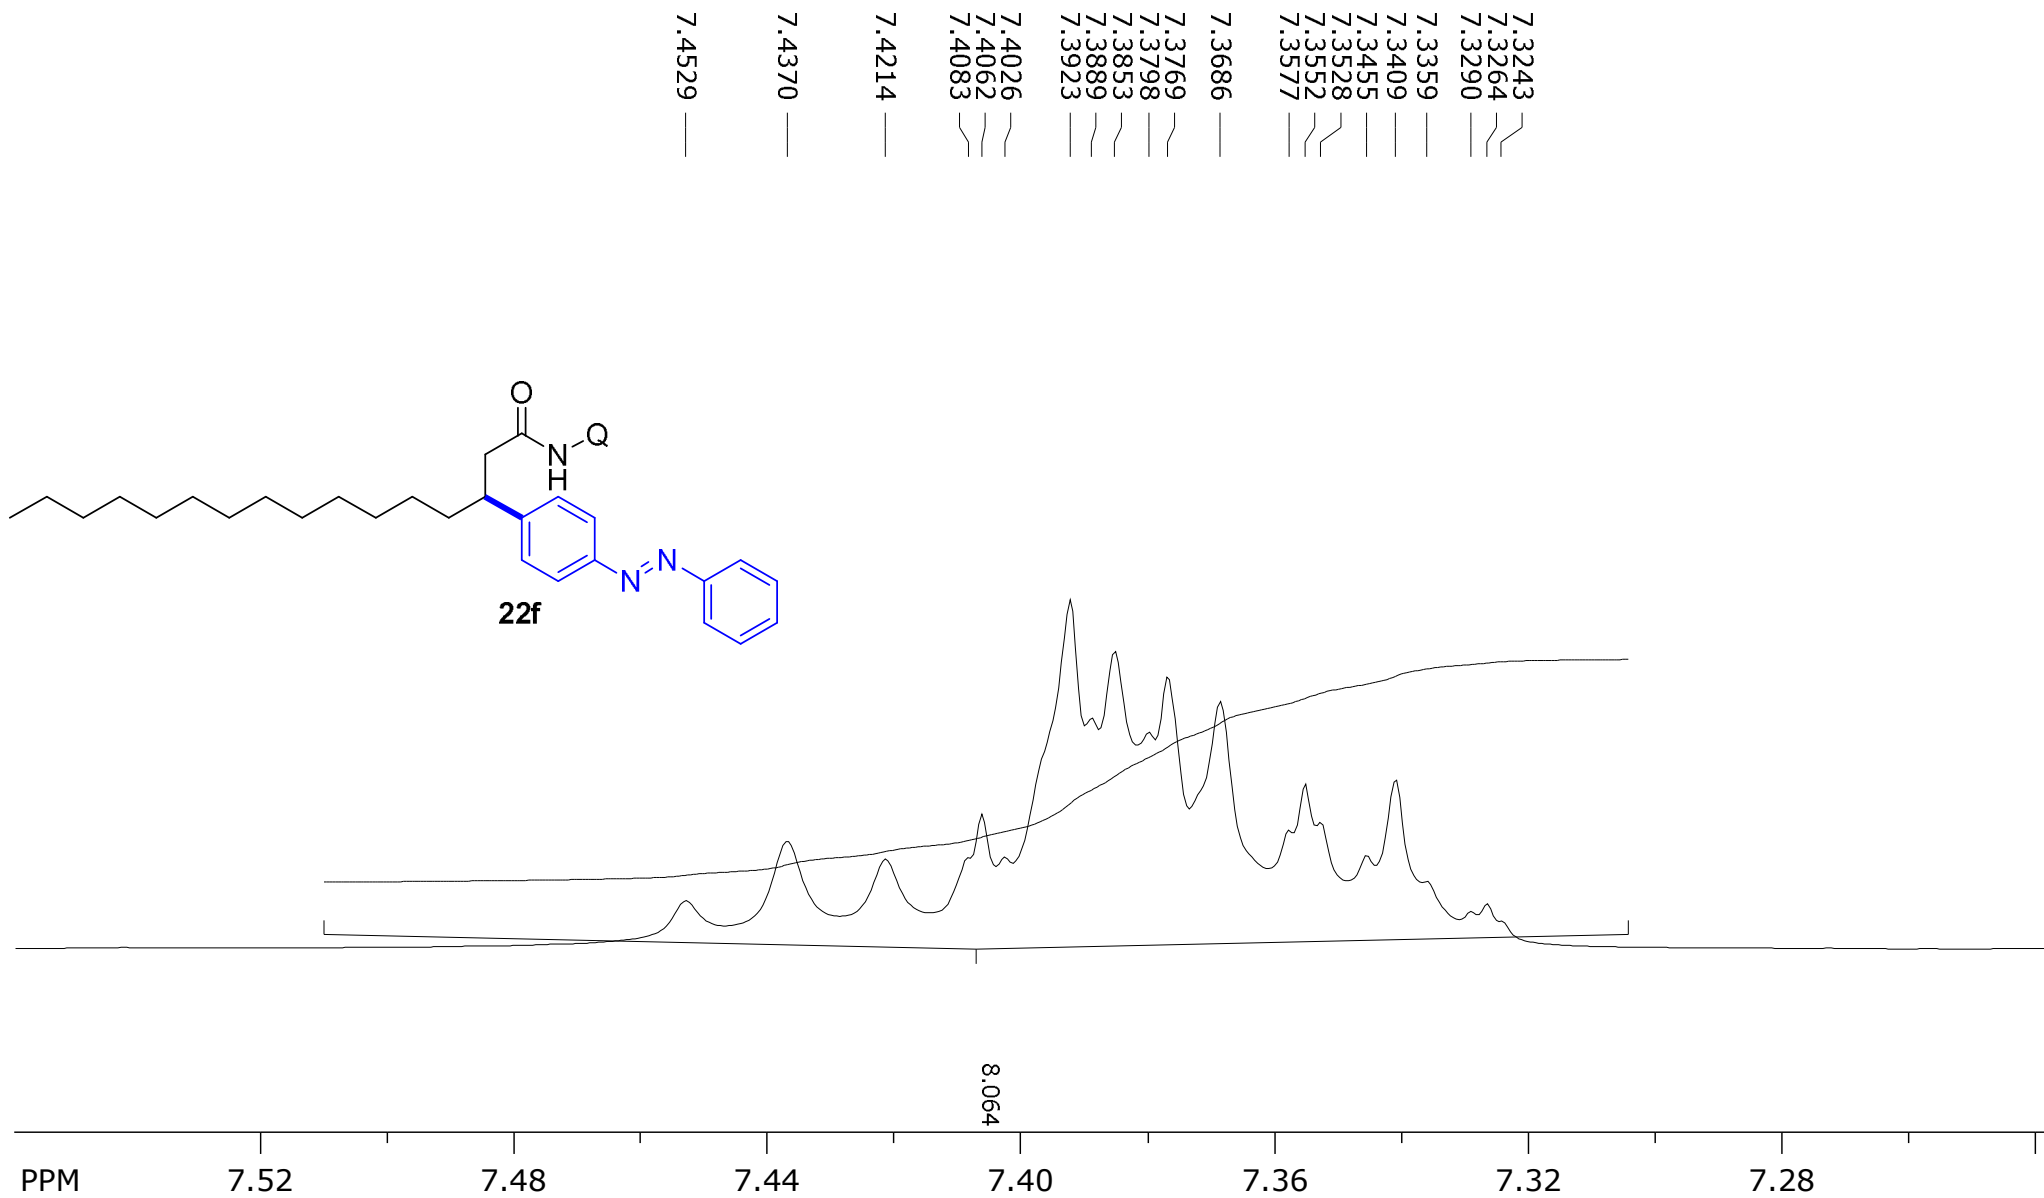

SpinWorks 4: SV070701  
1H\_8scan CDCl3 {D:\Spectra} nmr 27

3.2896  
3.3039  
3.3146  
3.3189  
3.3218  
3.3327  
3.3476

2.8605  
2.8752

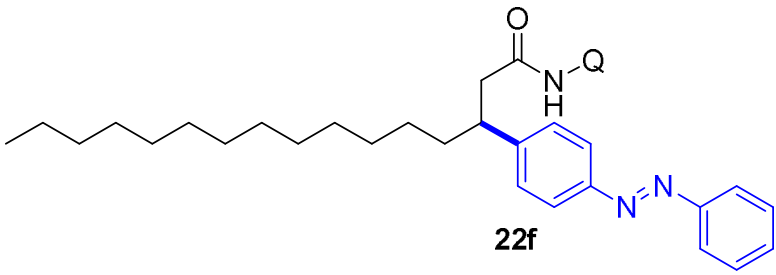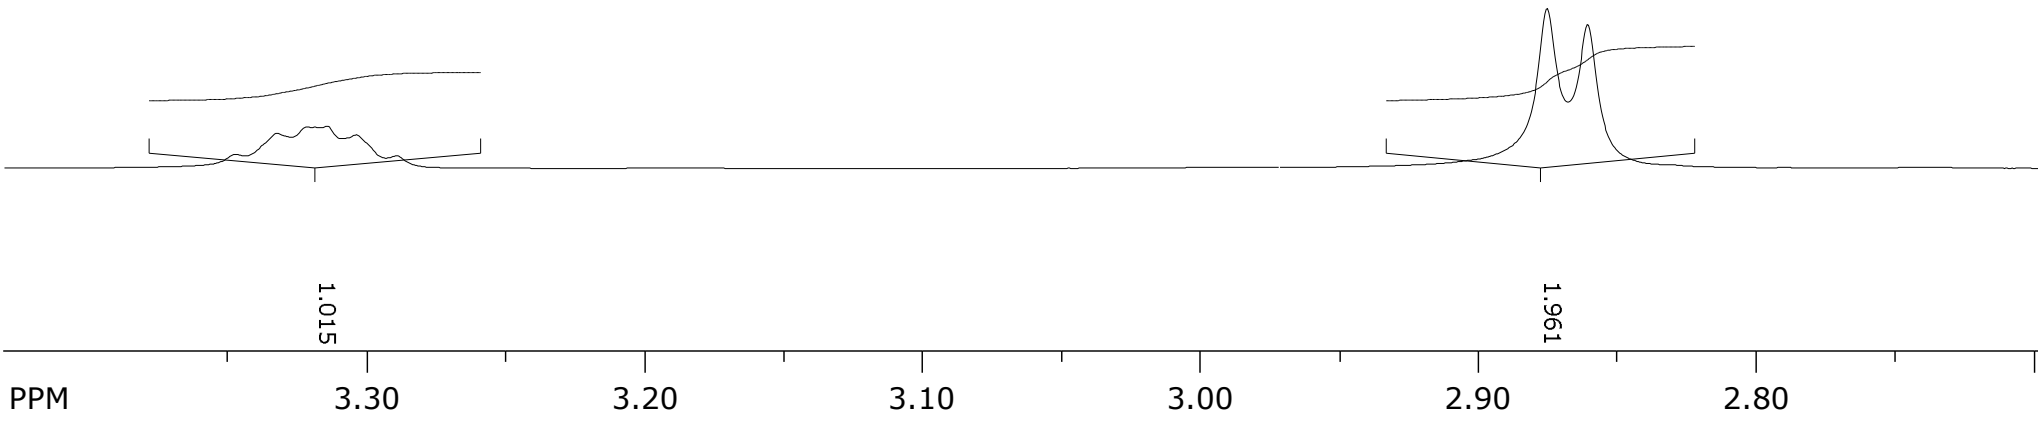

SpinWorks 4: SV070701

1H\_8scan CDCl3 {D:\Spectra} nmr 27

1.64448  
1.65333  
1.66336  
1.67113  
1.67917  
1.68977  
1.69889  
1.70877  
1.71889  
1.72995  
1.73889  
1.74522  
1.75159  
1.75792  
1.77444

1.2554  
1.2035  
1.1924  
1.1781  
1.1661  
1.1429  
1.1110

0.7644  
0.7786  
0.7923

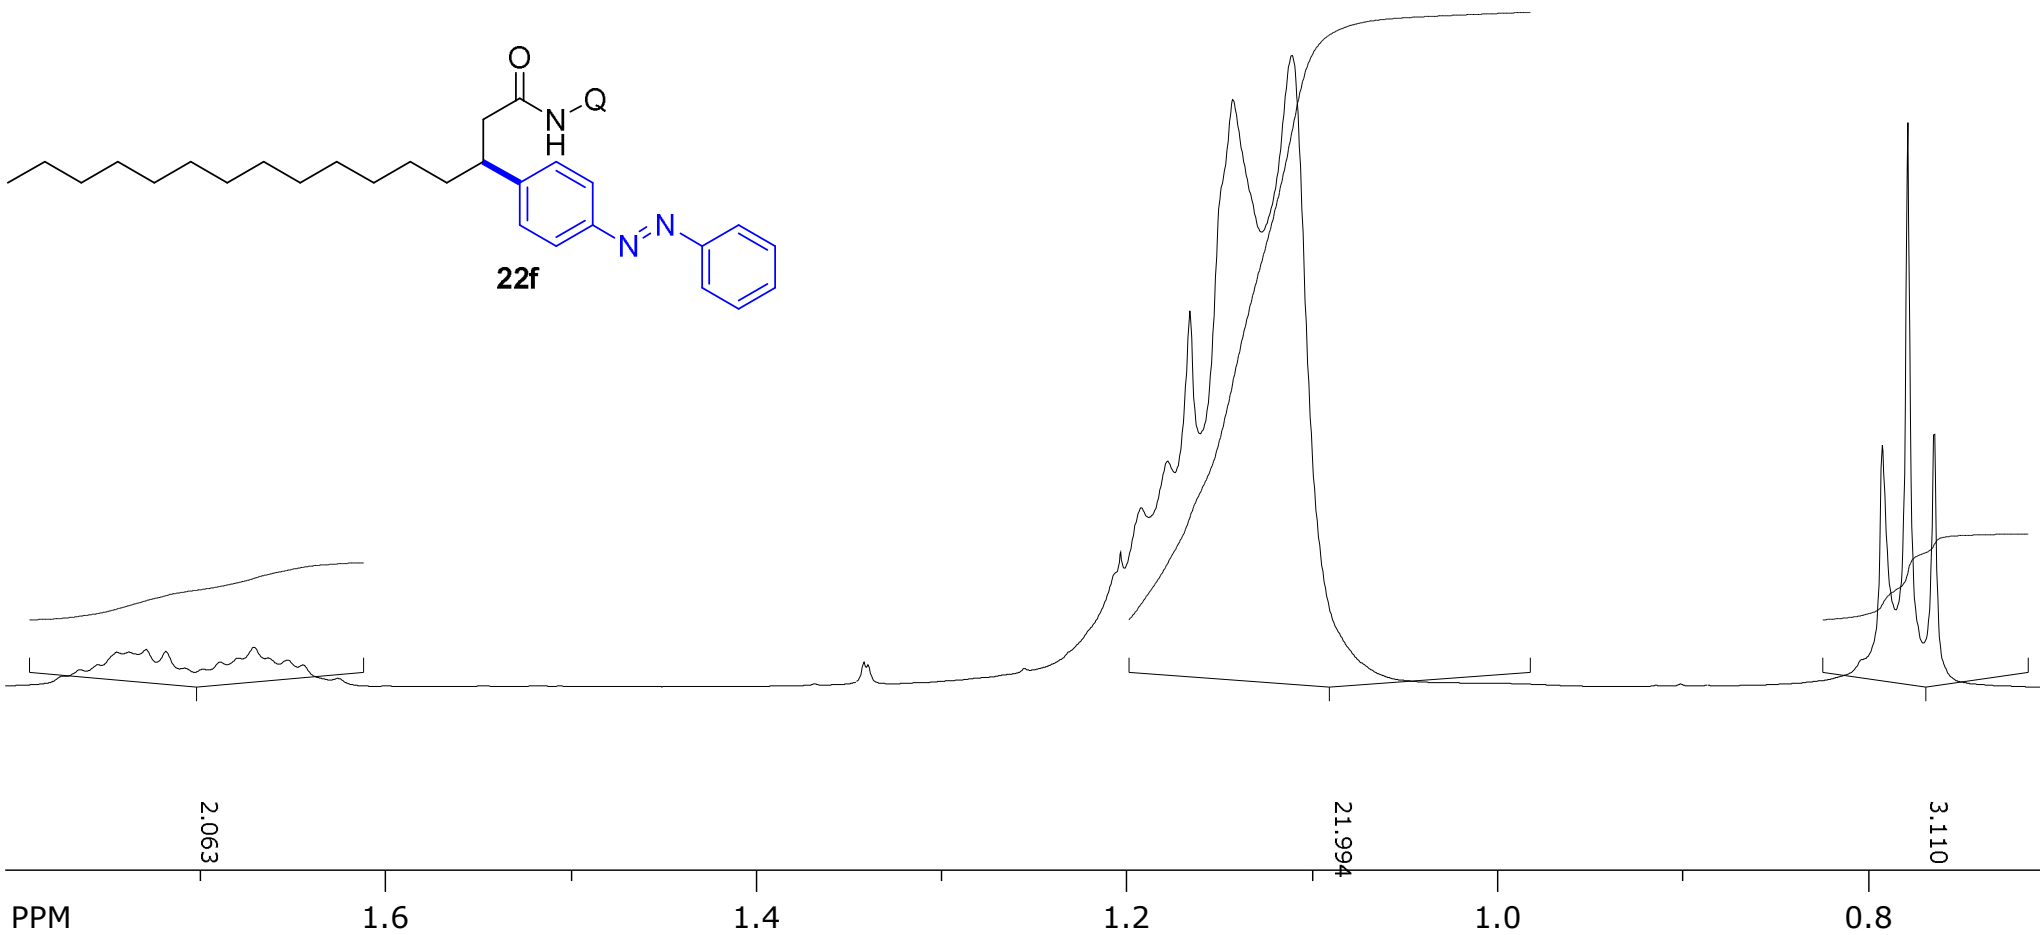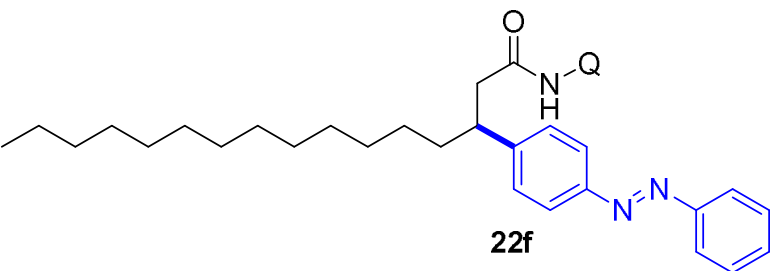

SpinWorks 4: SV070701  
C13CPD CDCl3 {D:\Spectra} nmr 27

SS-300

170.423  
152.642  
151.315  
147.906  
146.831  
138.204  
136.489  
133.546  
130.695  
128.982  
128.357  
128.128  
127.963  
123.058  
121.695  
118.310  
79.000  
45.308  
42.551  
36.198  
31.868  
29.598  
29.529  
29.503  
29.450  
27.392  
22.643  
14.097

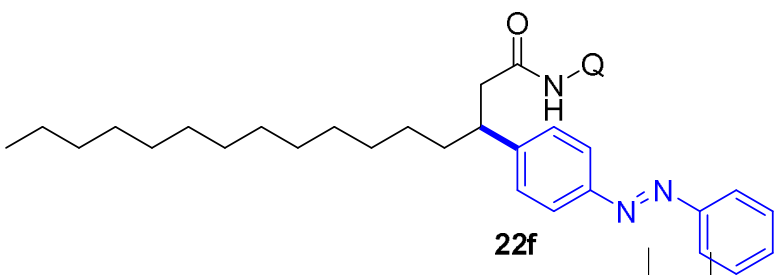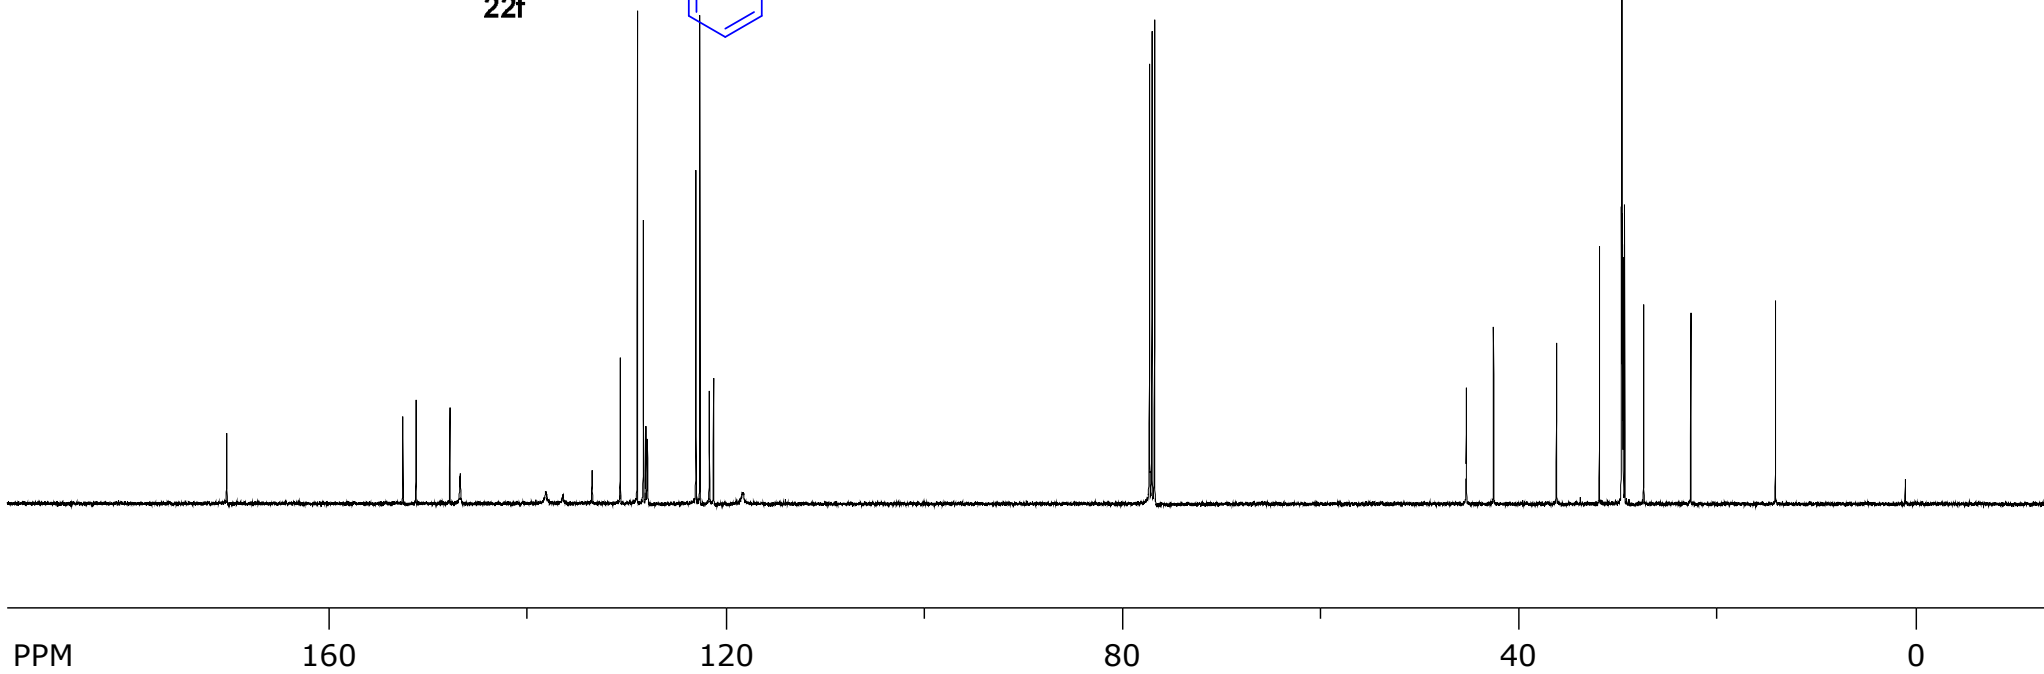

SpinWorks 4: SV070701  
C13CPD CDCl3 {D:\Spectra} nmr 27

170.423

152.642  
151.315

147.906  
146.831

138.204  
136.489

133.546

130.695  
128.982  
128.357  
128.128  
127.963

123.058  
122.655  
121.706  
121.285

118.310

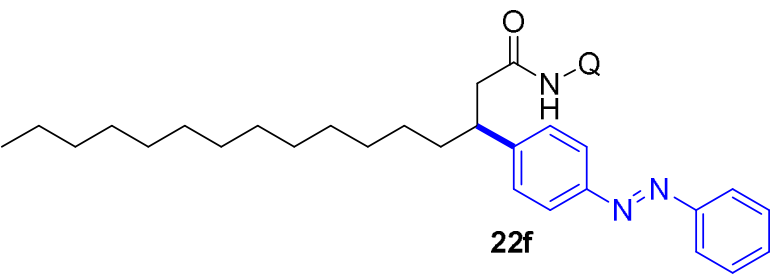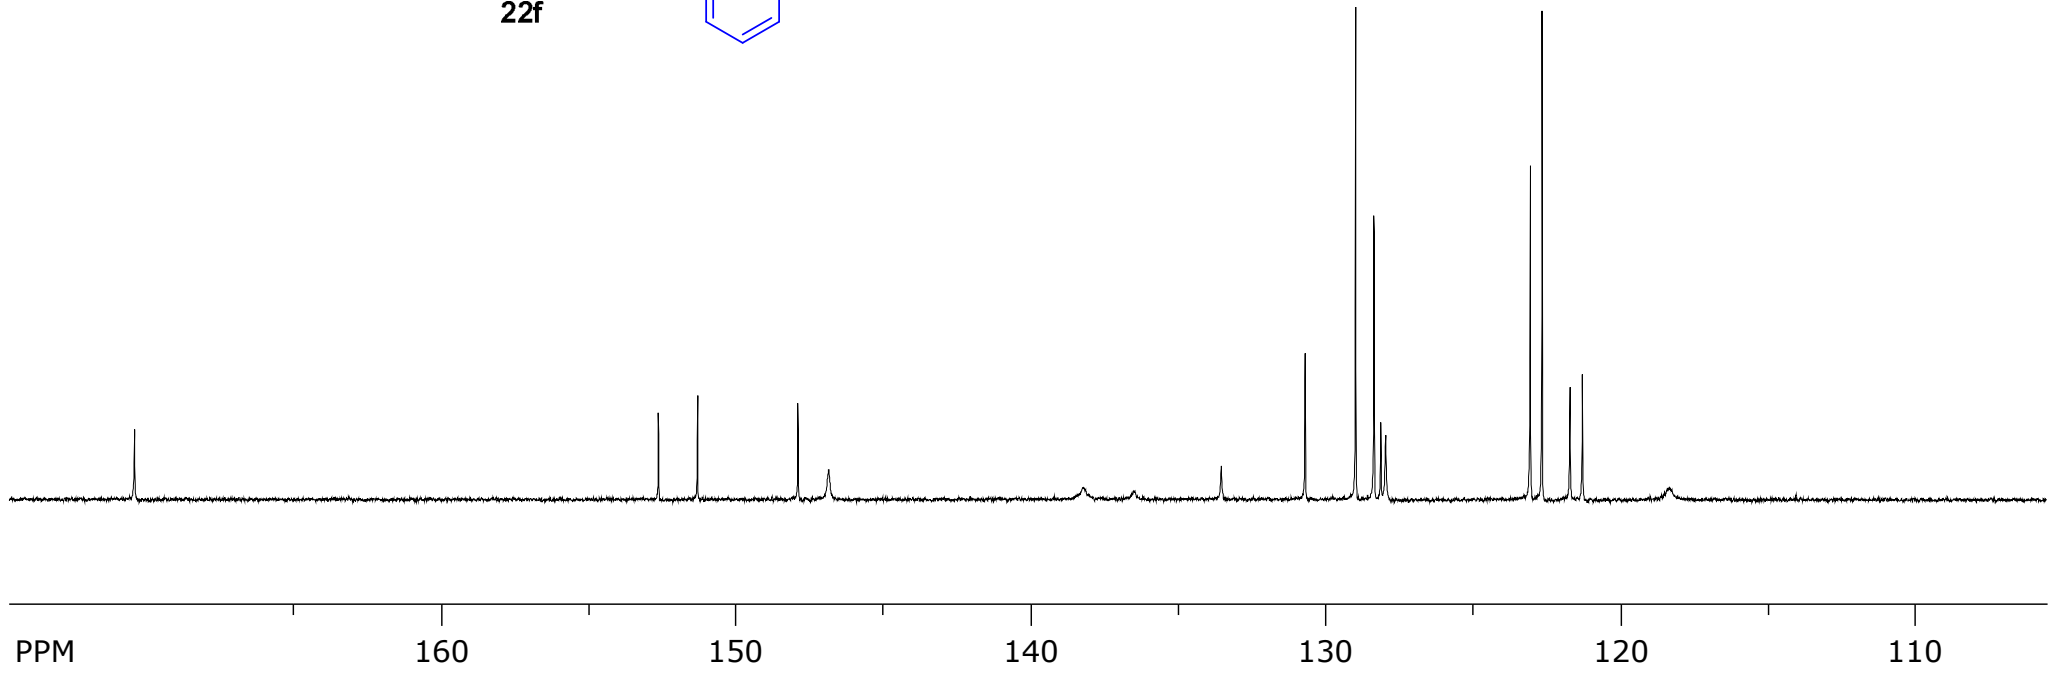



SpinWorks 4: SV070701  
C13CPD CDCl3 {D:\Spectra} nmr 27

45.308

42.551

36.198

31.868

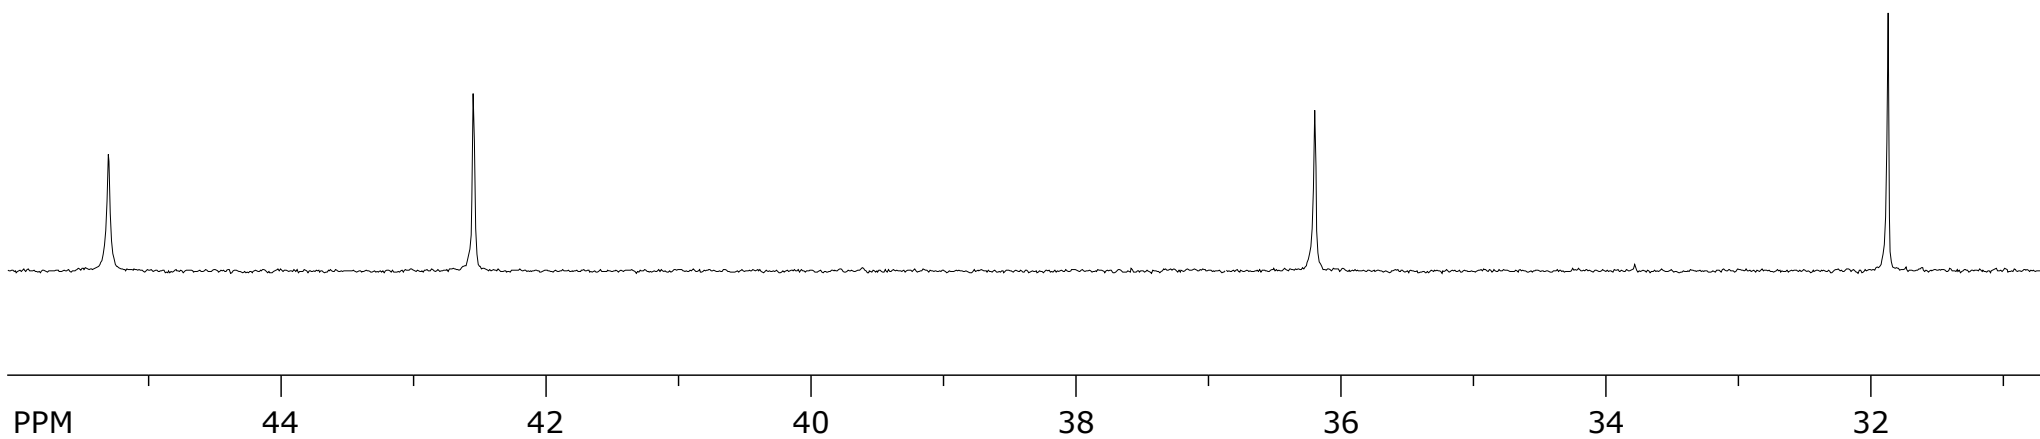

SpinWorks 4: SV070701  
C13CPD CDCl3 {D:\Spectra} nmr 27

29.306  
29.450  
29.503  
29.529  
29.568  
29.594  
29.630  
29.659

27.392

22.643

14.097

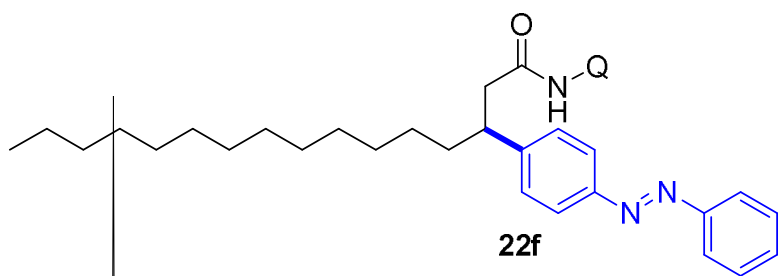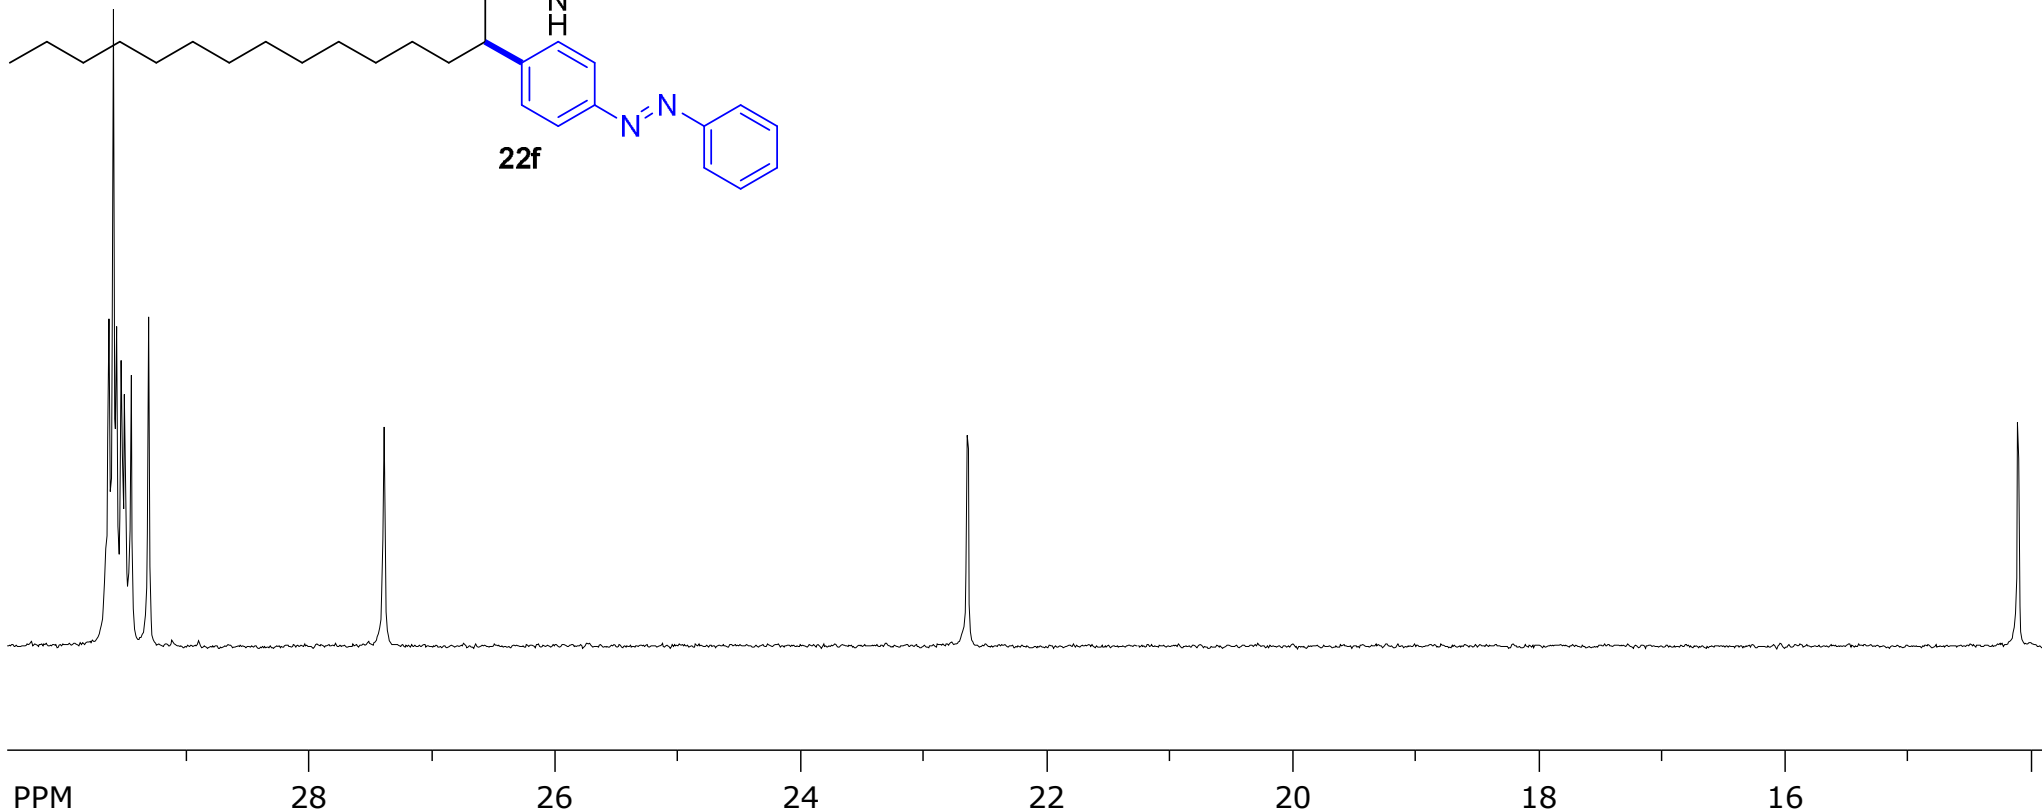

PPM 28 26 24 22 20 18 16

SpinWorks 4: SS 767  
PROTON CDCl3 /opt/topspin3.5pl2/nmrdata nmrsu 39

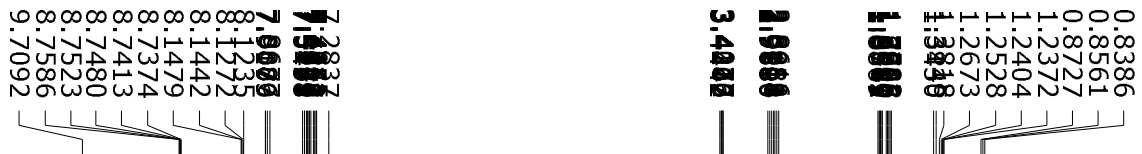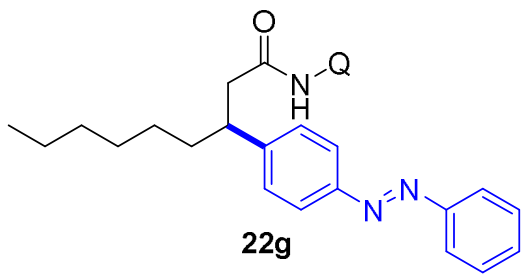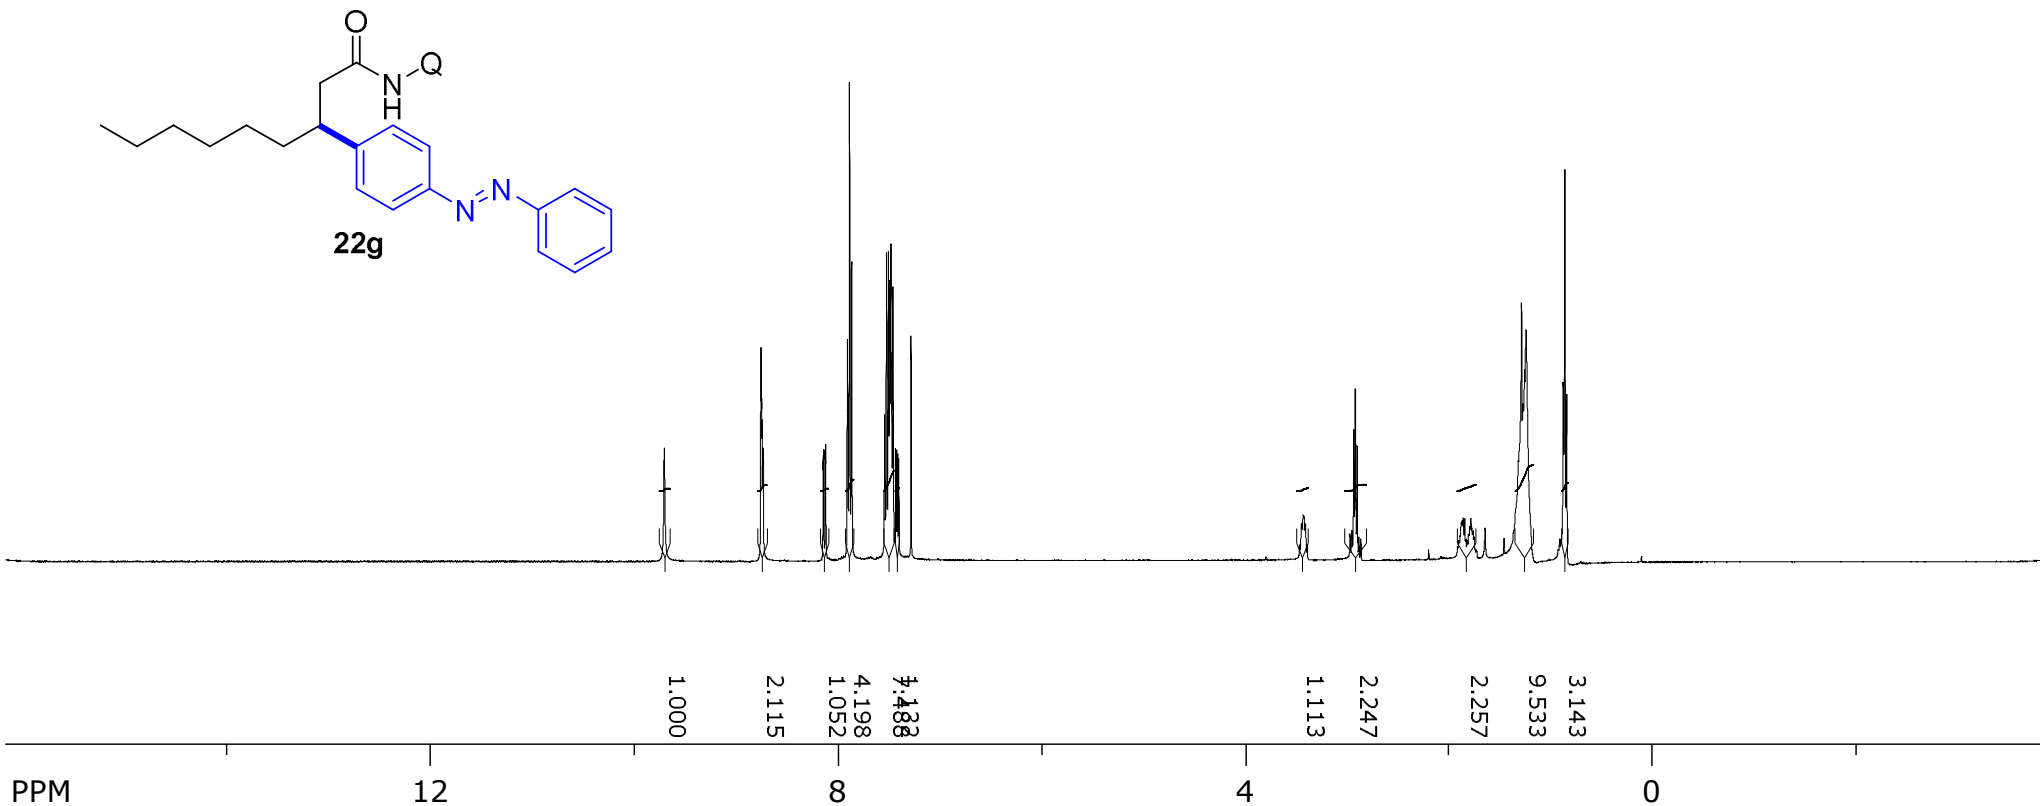

SpinWorks 4: SS 767  
PROTON CDCl3 /opt/topspin3.5pl2/nmrdata nmrsu 39

9.7092

8.7374  
8.7413  
8.7480  
8.7523  
8.7586

8.1235  
8.1272  
8.1442  
8.1479

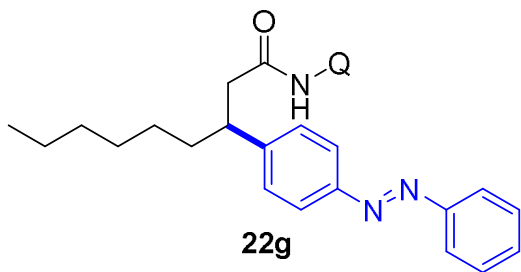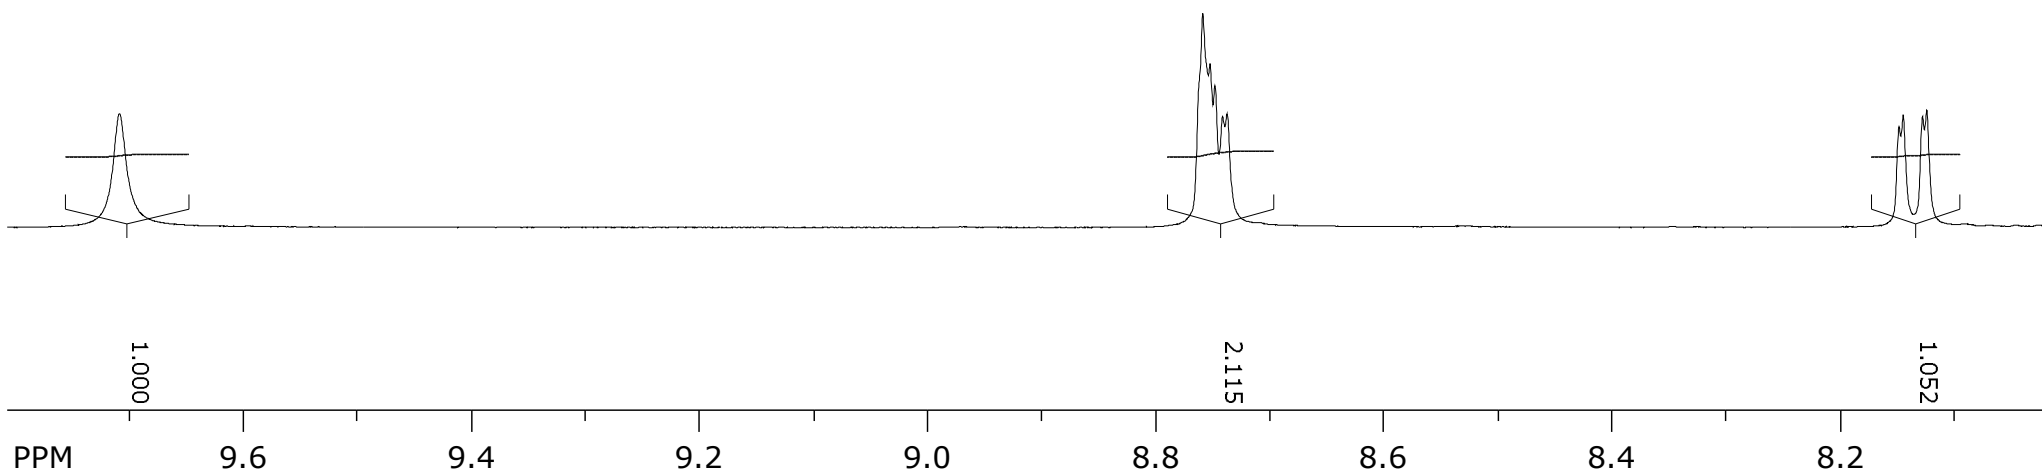

SpinWorks 4: SS 767  
PROTON CDCl3 /opt/topspin3.5pl2/nmrdata nmrsu 39

7.8677 —  
7.8886 —  
7.9073 —  
7.9109 —

7.4045 —  
7.4151 —  
7.4252 —  
7.4357 —  
7.4618 —  
7.4740 —  
7.4827 —  
7.4931 —  
7.4971 —  
7.5059 —  
7.5239 —  
7.5261 —  
7.5438 —

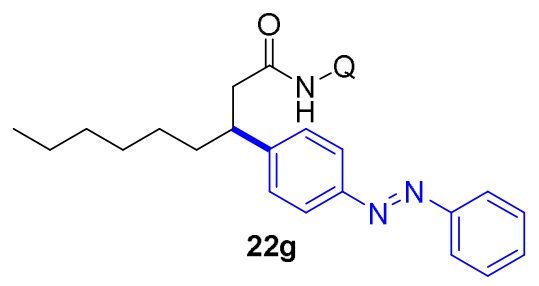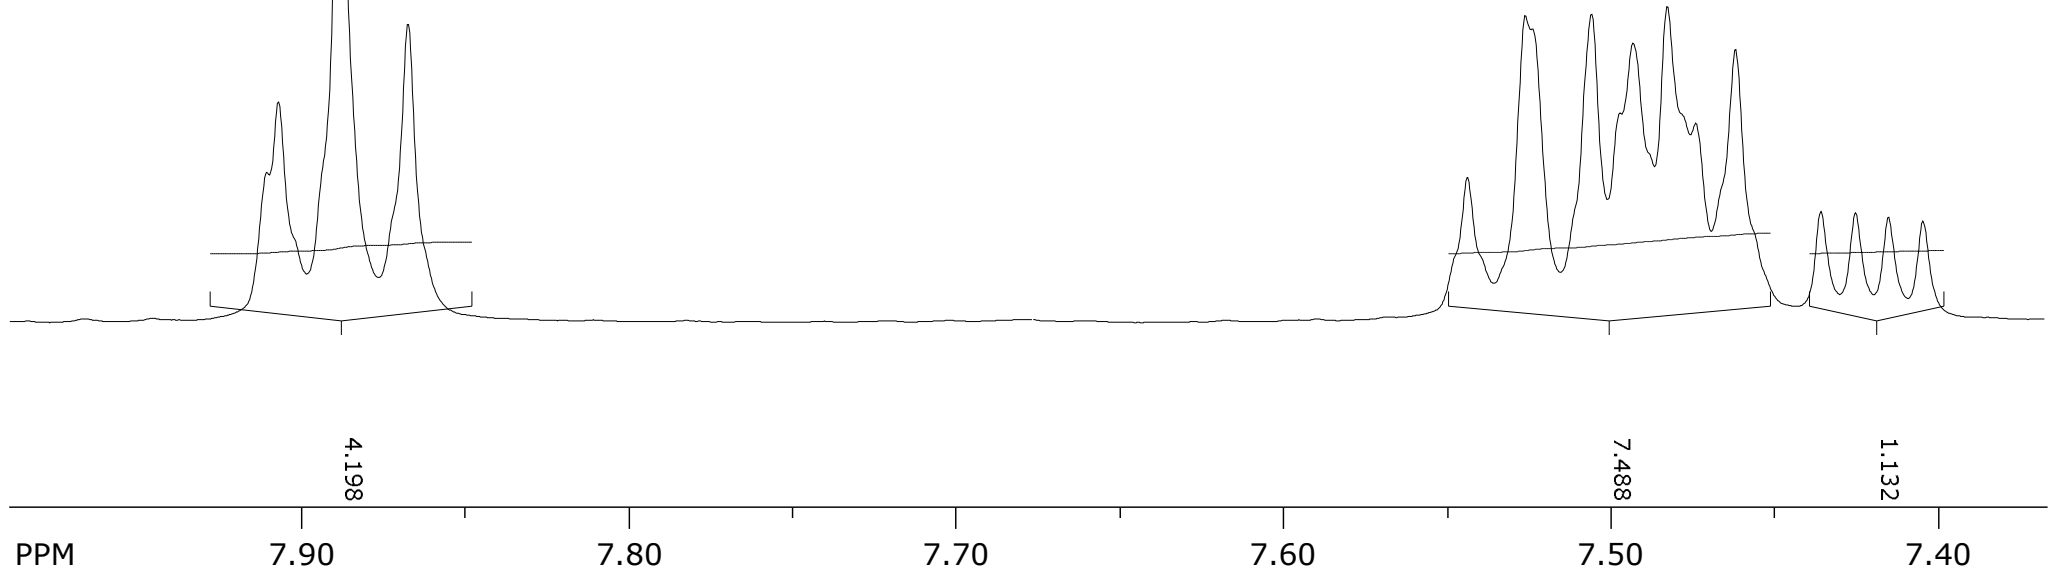

SpinWorks 4: SS 767  
PROTON CDCl3 /opt/topspin3.5pl2/nmrdata nmrsu 39

3.4077  
3.4126  
3.4212  
3.4263  
3.4306  
3.4442

2.8616  
2.8812  
2.8981  
2.9168  
2.9314  
2.9506  
2.9680

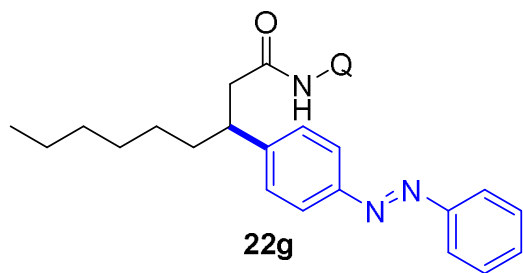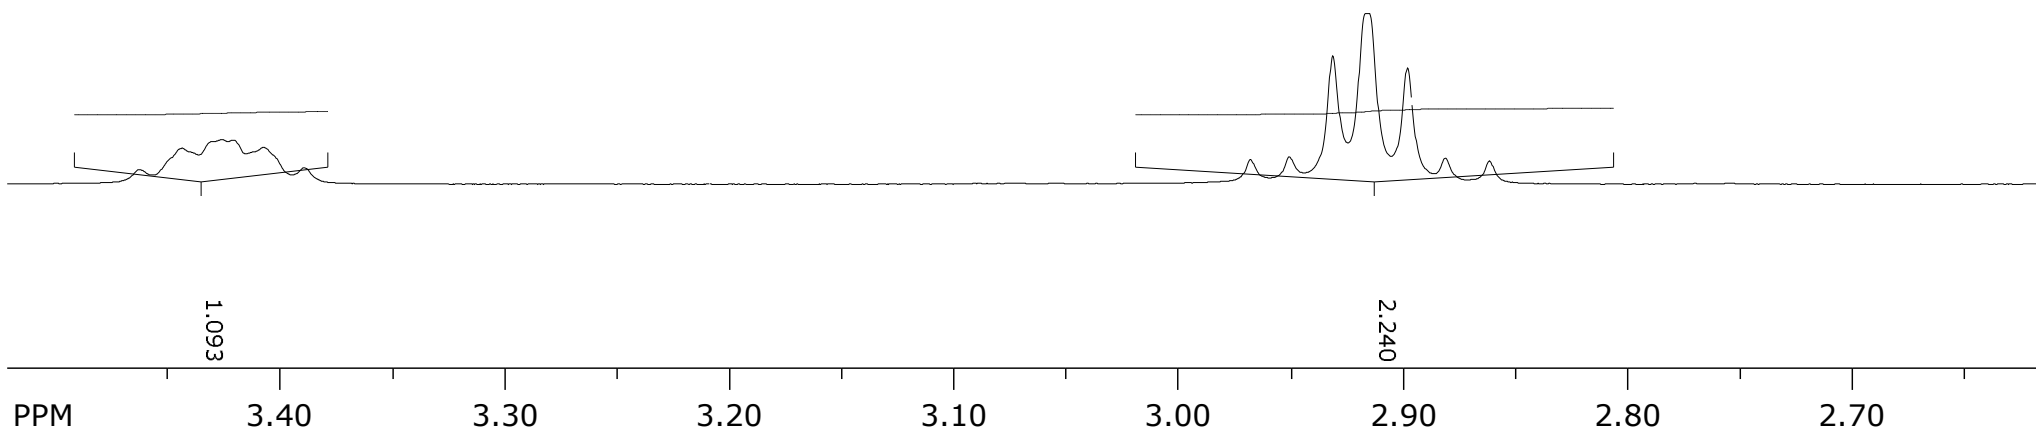

SpinWorks 4: SS 767  
PROTON CDCl3 /opt/topspin3.5pl2/nmrdata nmrsu 39

1.7582  
1.7706  
1.7805  
1.7917  
1.8036  
1.8410  
1.8541  
1.8599  
1.8662  
1.8742  
1.8869

1.2372  
1.2404  
1.2528  
1.2673  
1.2818  
1.3145  
1.3430

0.8386  
0.8561  
0.8727

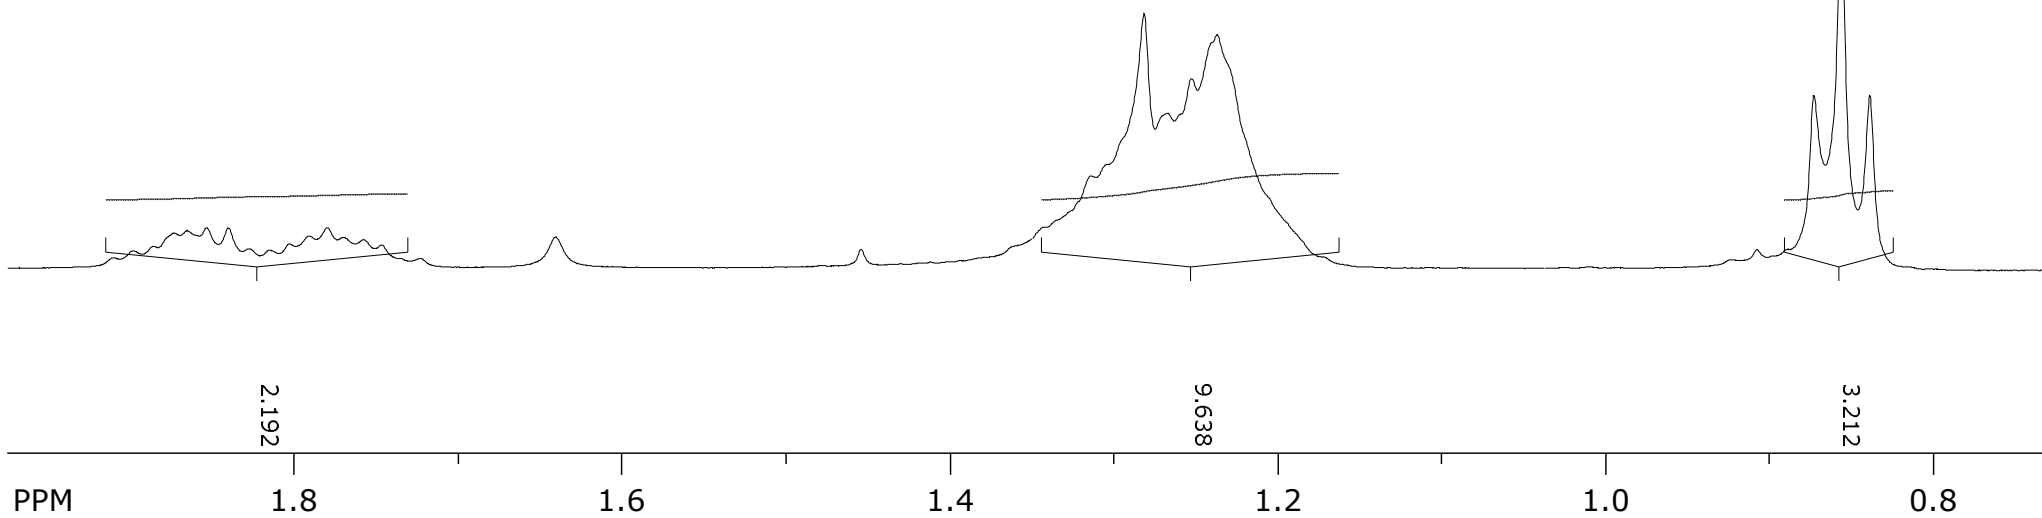

SpinWorks 4: SS 767

C13CPD256 CDCl3 /opt/topspin3.5pl2/nmrdata nmrsu 15

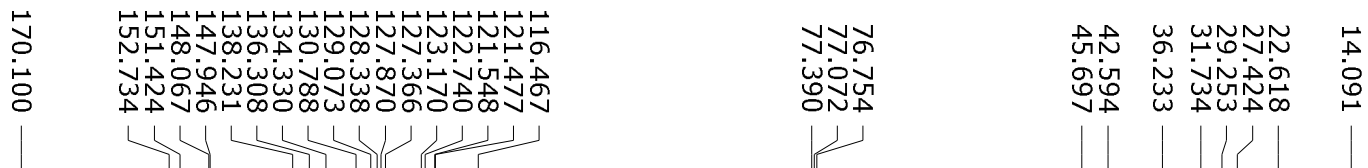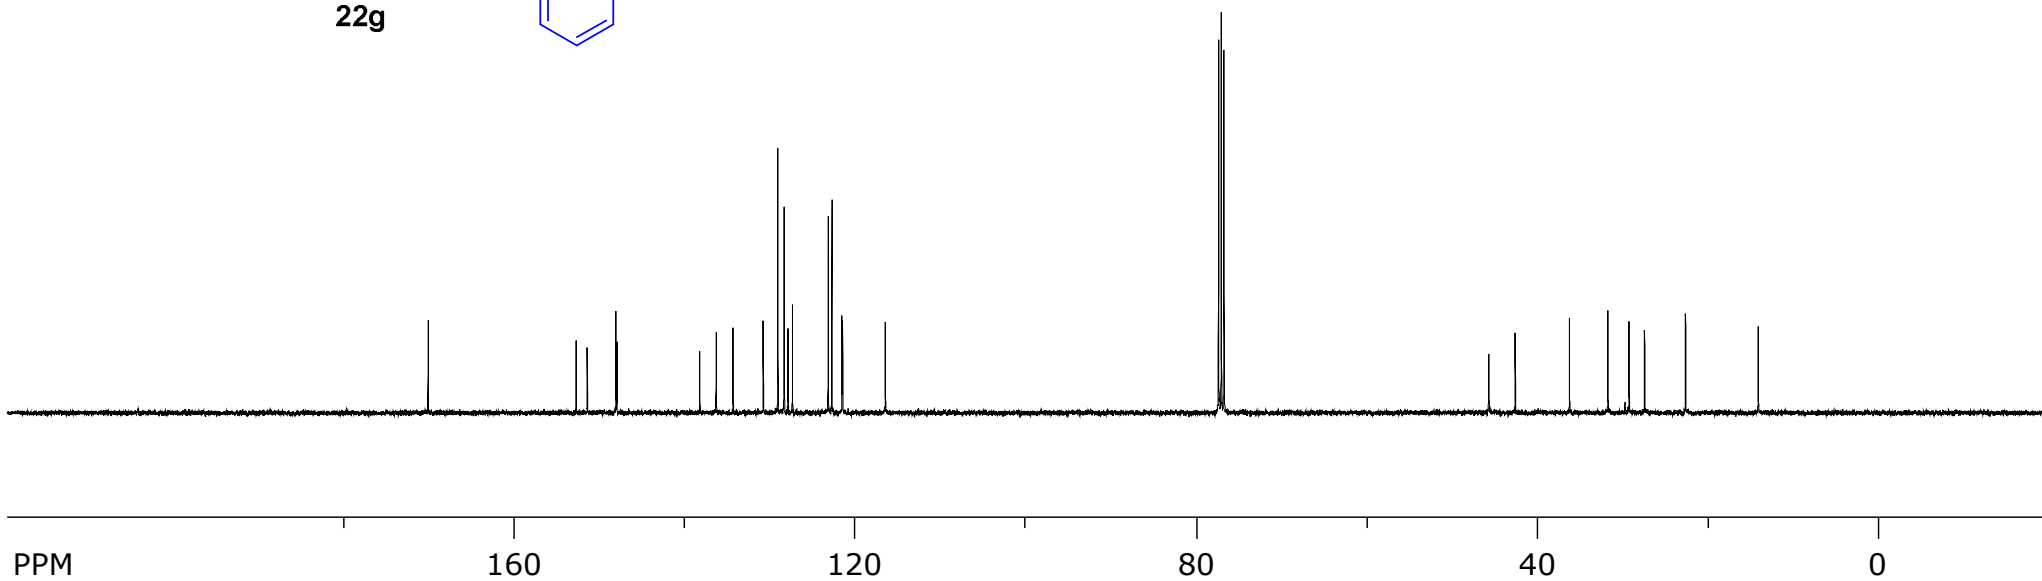



SpinWorks 4: SS-757  
PROTON CDCl3 /opt/topspin3.5pl2/nmrdata nmrsu 2

7.2834  
7.1900  
7.1004  
8.1232  
8.1438  
8.1479  
8.7358  
8.7400  
8.7472  
8.7516  
8.7579  
8.7618  
9.7076

1.9808  
3.4000

0.8795  
0.8971  
0.9138  
1.2232  
1.2640  
1.6396  
1.7433  
1.7541  
1.7670  
1.8000

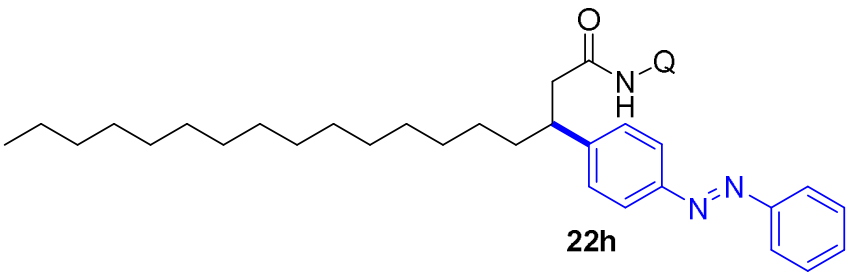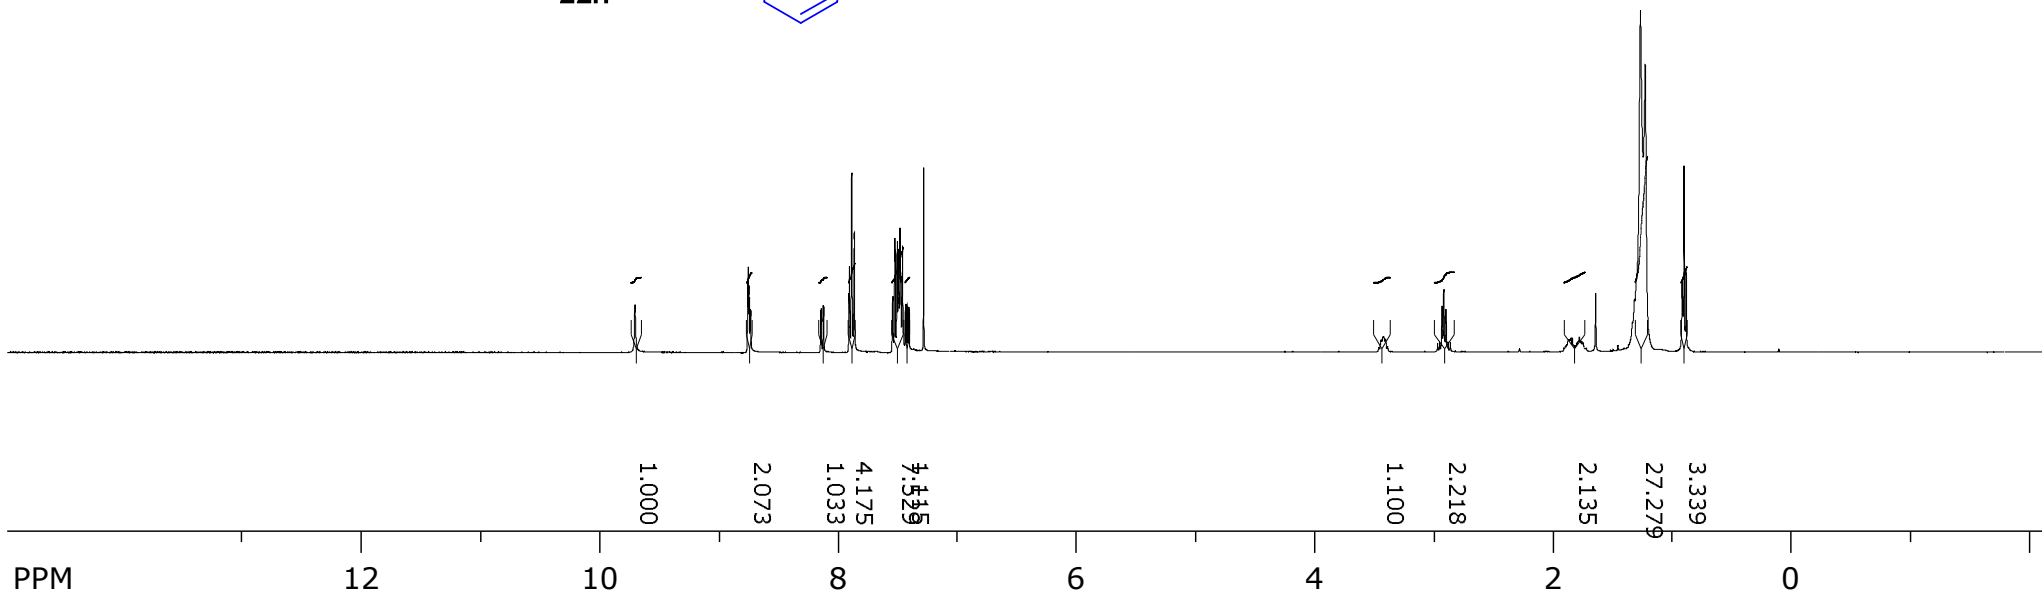

SpinWorks 4: SS-757  
PROTON CDCl3 /opt/topspin3.5pl2/nmrdata nmrsu 2

9.7076

8.7358  
8.7400  
8.7472  
8.7516  
8.7579  
8.7618

8.1231  
8.1272  
8.1438  
8.1479

7.8664  
7.8874  
7.9012  
7.9063  
7.9100

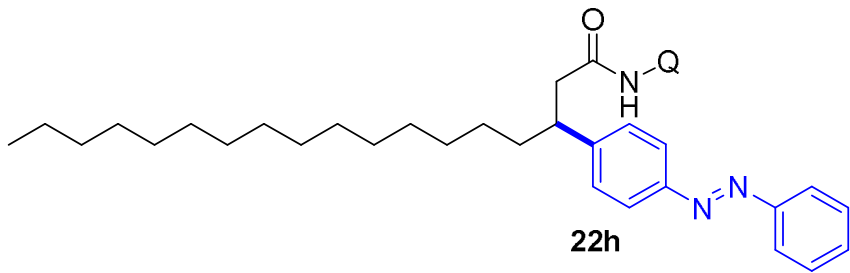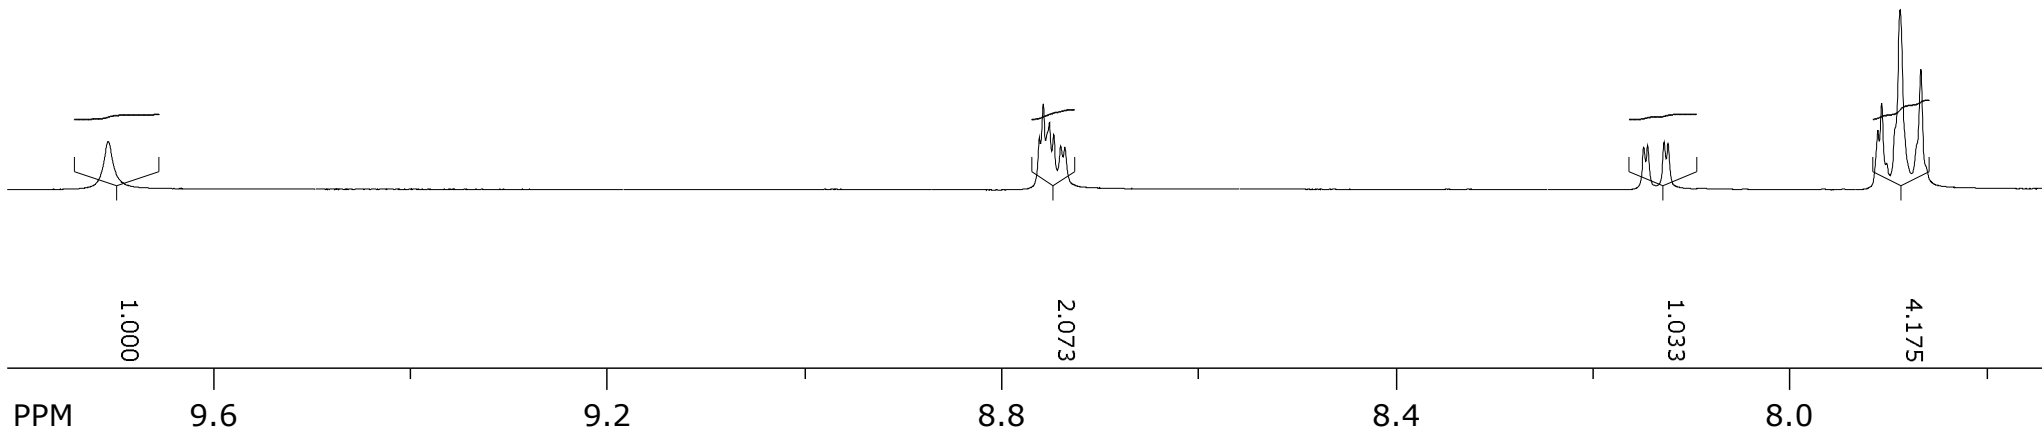

SpinWorks 4: SS-757  
PROTON CDCl3 /opt/topspin3.5pl2/nmrdata nmrsu 2

7.5389 —  
7.5432 —  
7.5469 —  
7.5226 —  
7.5258 —  
7.5102 —  
7.5050 —  
7.4975 —  
7.4932 —  
7.4875 —  
7.4815 —  
7.4770 —  
7.4737 —  
7.4606 —  
7.4559 —  
7.4359 —  
7.4253 —  
7.4152 —  
7.4046 —

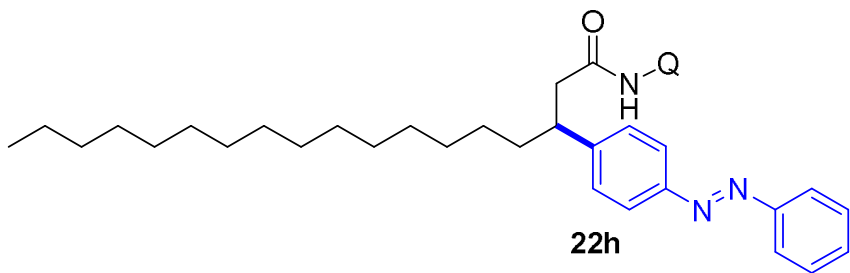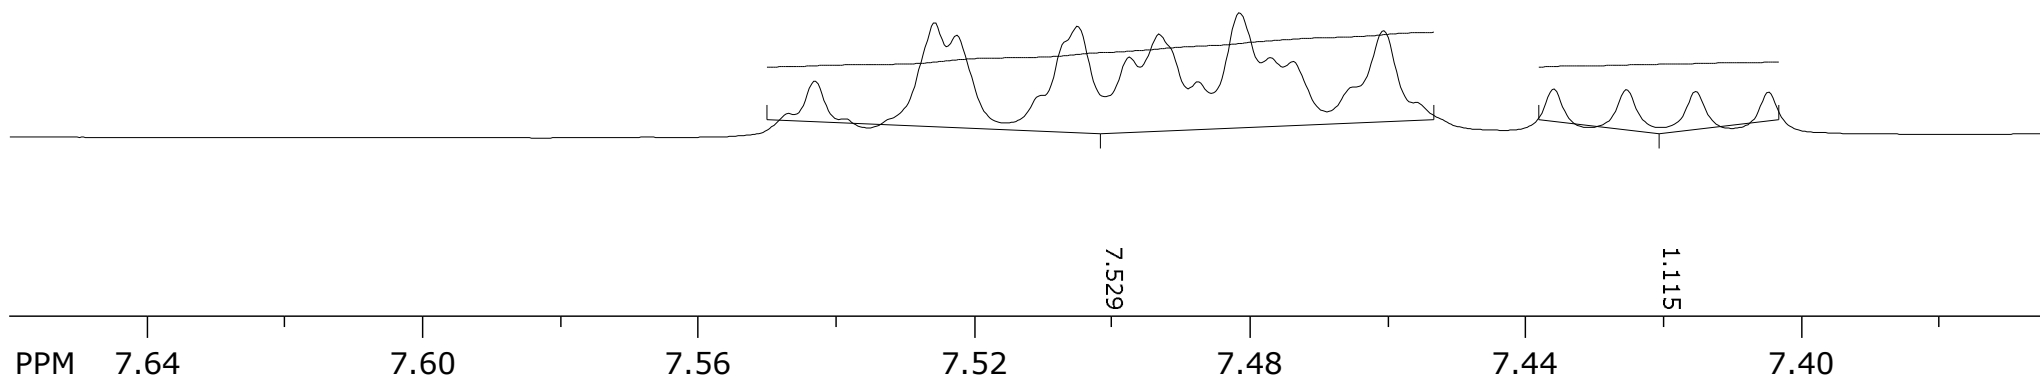

SpinWorks 4: SS-757  
PROTON CDCl3 /opt/topspin3.5pl2/nmrdata nmrsu 2

3.4051  
3.4185  
3.4236  
3.4281  
3.4369  
3.4416

2.8598  
2.8795  
2.8964  
2.9154  
2.9300  
2.9492  
2.9666

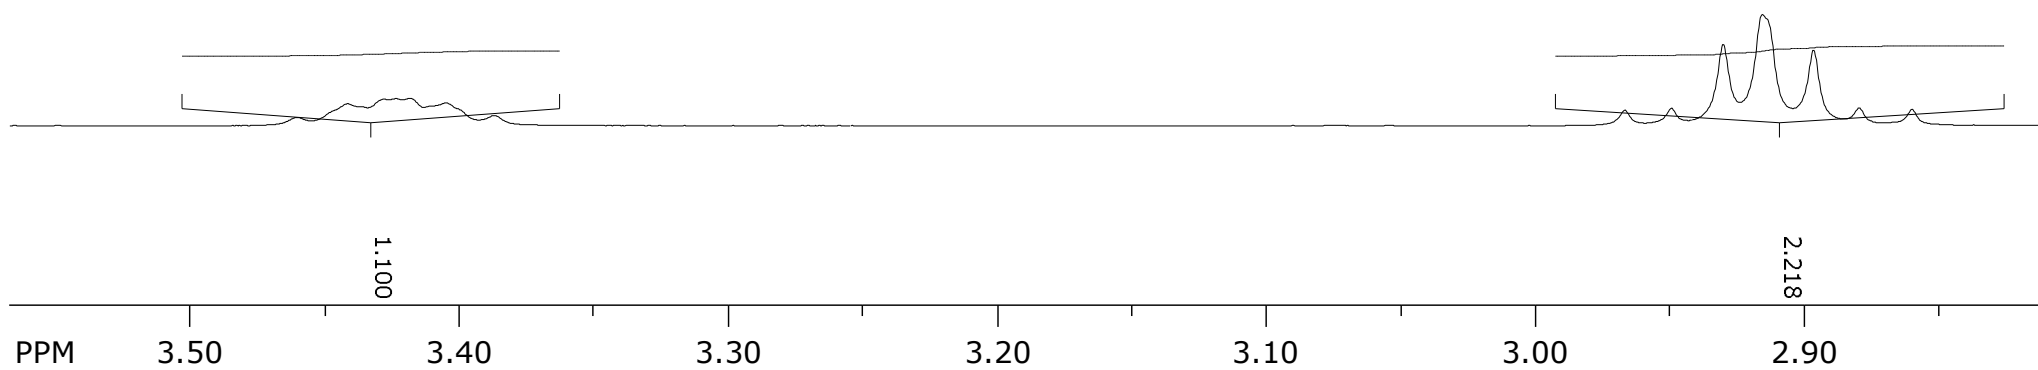

SpinWorks 4: SS-757  
PROTON CDCl3 /opt/topspin3.5pl2/nmrdata nmrsu 2

1.7433  
1.7541  
1.7670  
1.7763  
1.7855  
1.7866  
1.7997  
1.8361  
1.8492  
1.8543  
1.8552  
1.8616  
1.8686

1.2232  
1.2640

0.8795  
0.8971  
0.9138

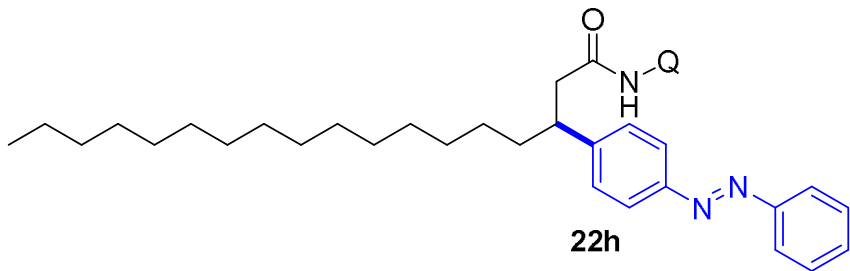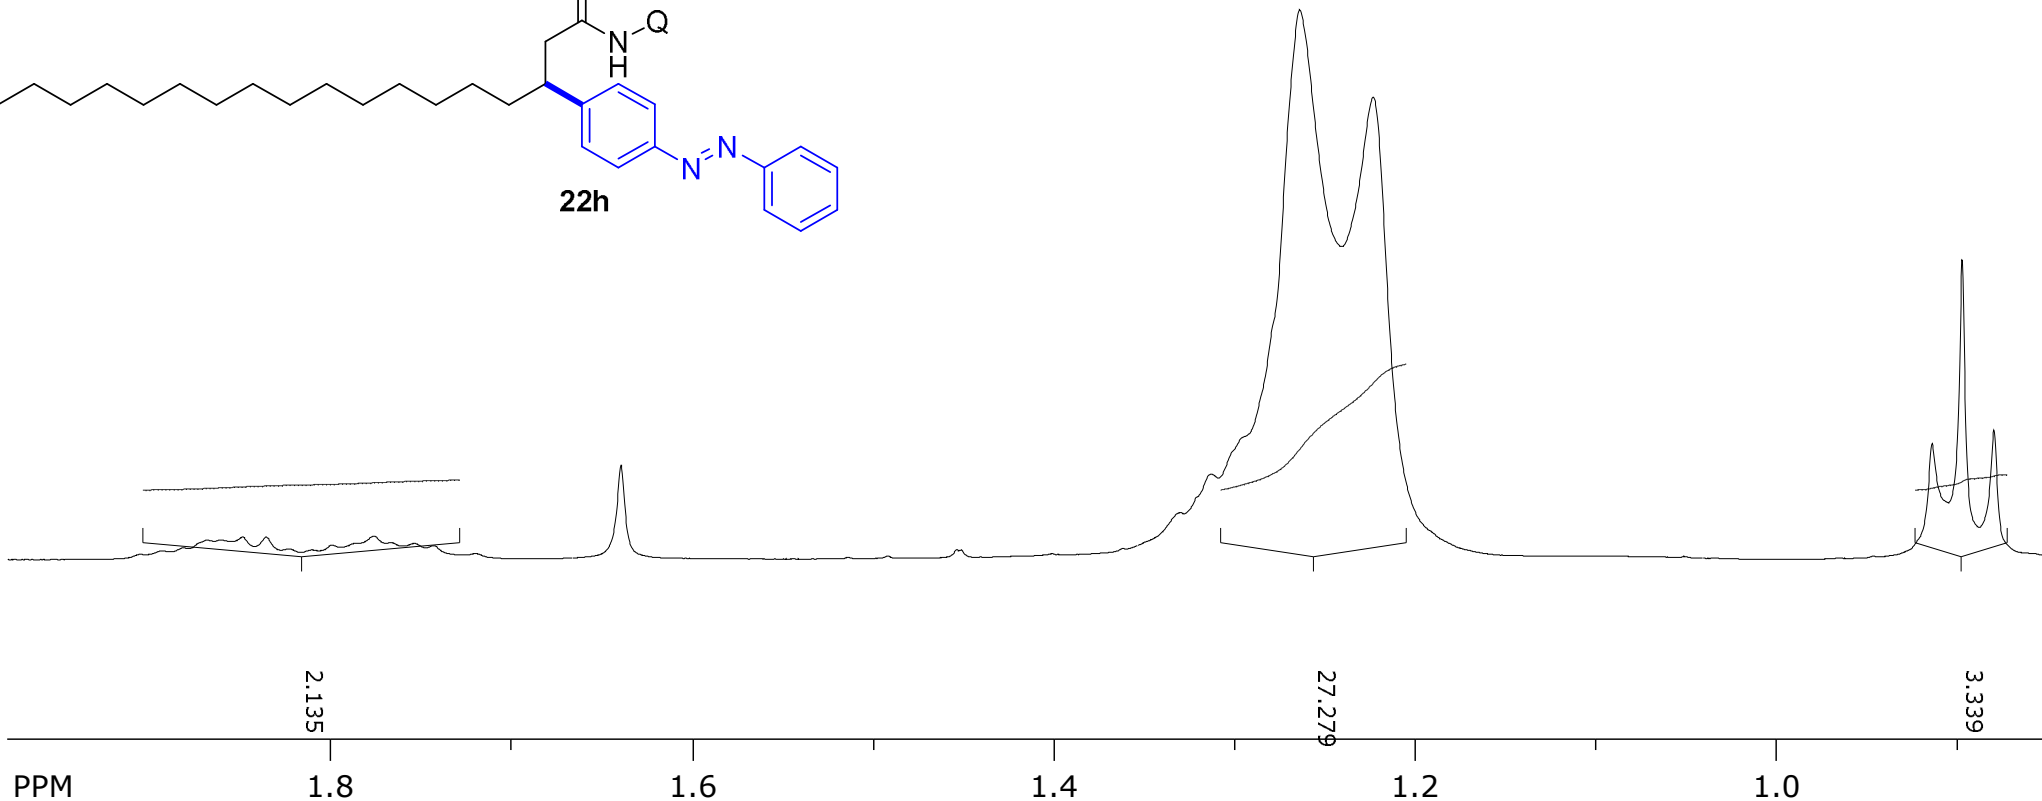

SpinWorks 4: SS-757

C13CPD256 CDCl3 /opt/topspin3.5pl2/nmrdata nmrsu\_5

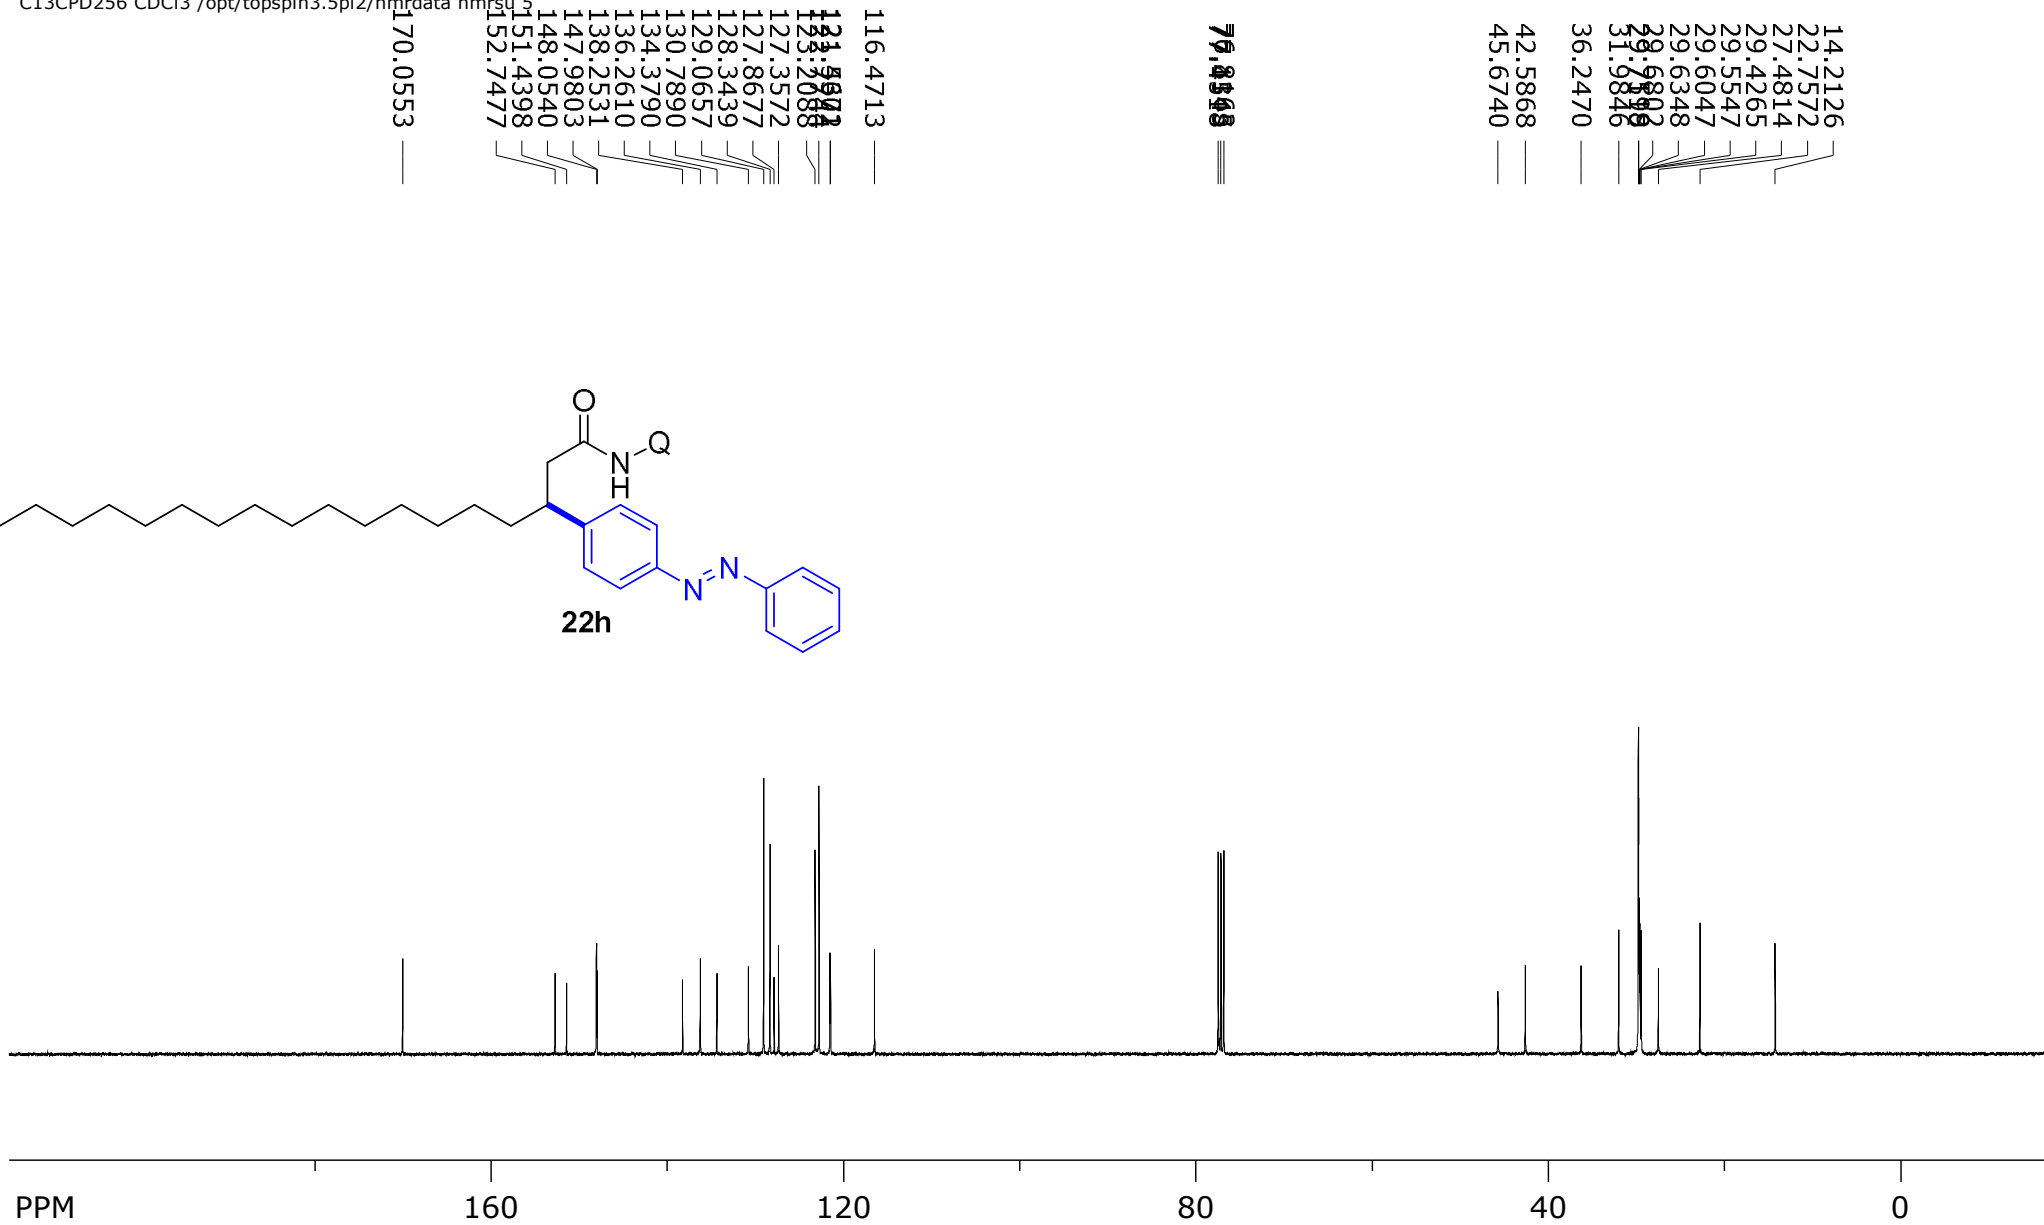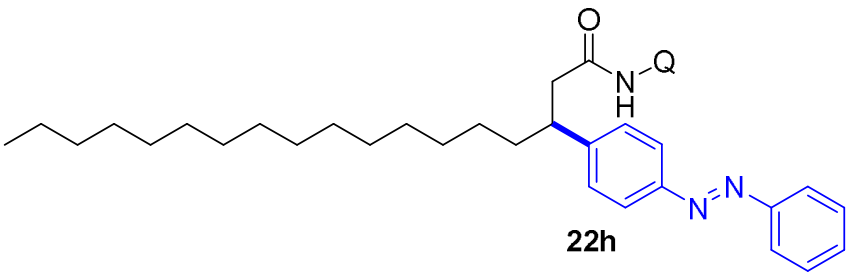

PPM

160

120

80

40

0

SpinWorks 4: SS-757  
C13CPD256 CDCl3 /opt/topspin3.5pl2/nmrdata nmrsu 5

170.0553

151.4398  
152.7477

147.9803  
148.0540

138.2531  
136.2610  
134.3790

130.7890  
129.0657  
128.3439  
127.8677  
127.3572

123.2088  
122.7744  
121.5302  
121.4671

116.4713

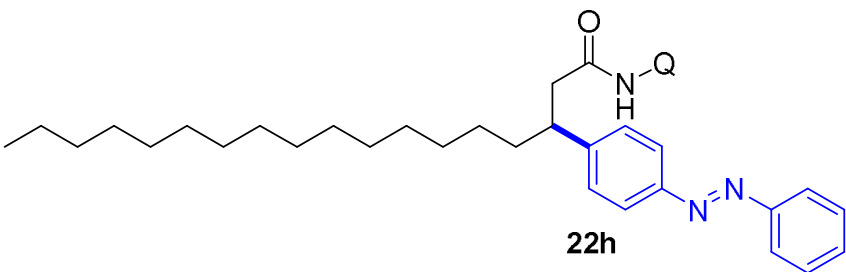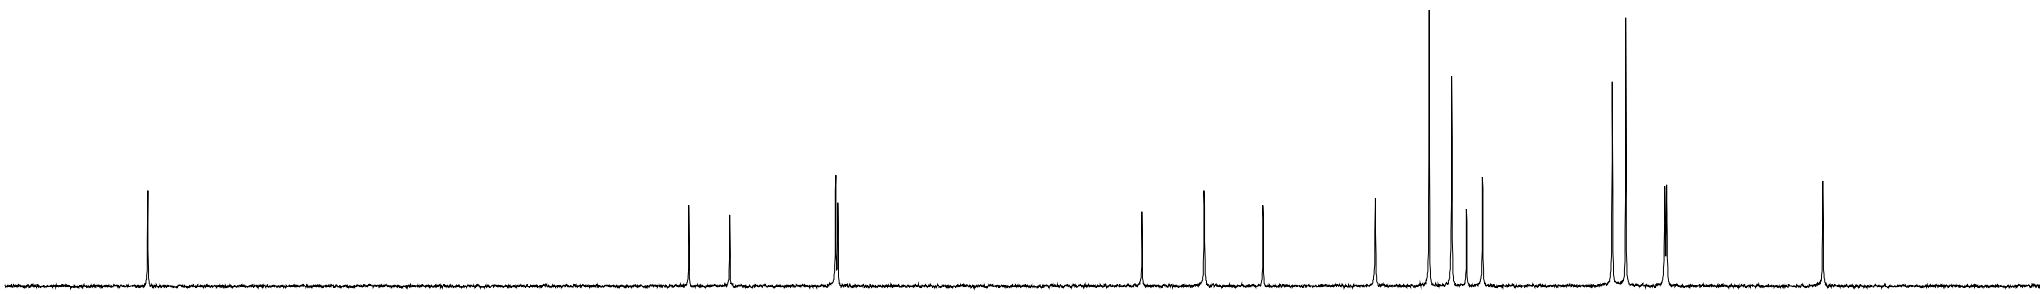

PPM 160 150 140 130 120

SpinWorks 4: SS-757  
C13CPD256 CDCl3 /opt/topspin3.5pl2/nmrdata nmrsu 5

45.6740

42.5868

36.2470

31.9846

27.4814  
29.4265  
29.5547  
29.6047  
29.6348  
29.6802  
29.7199  
29.7518

22.7572

14.2126

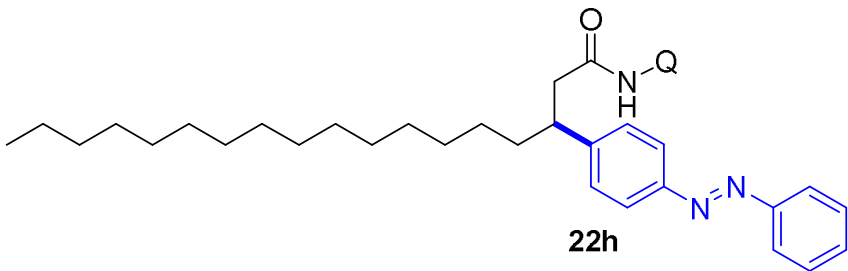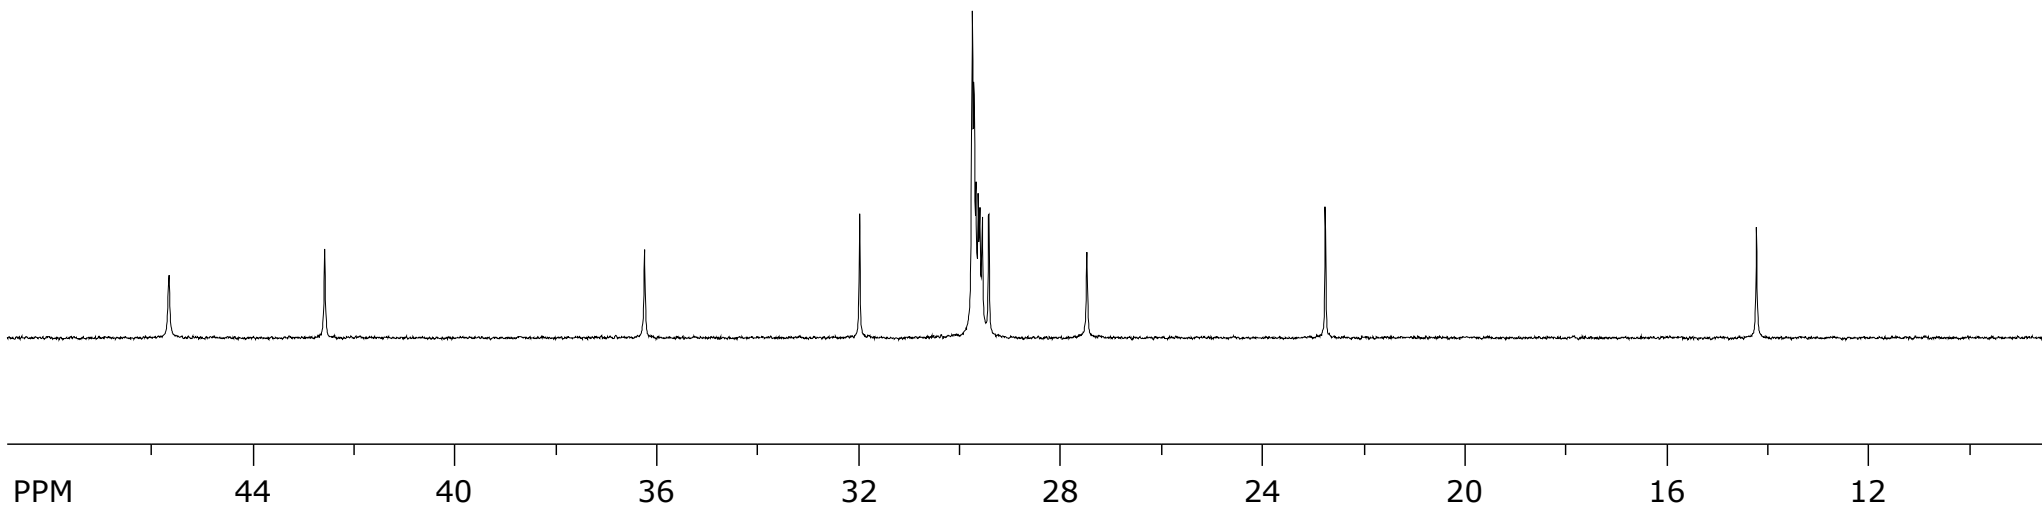



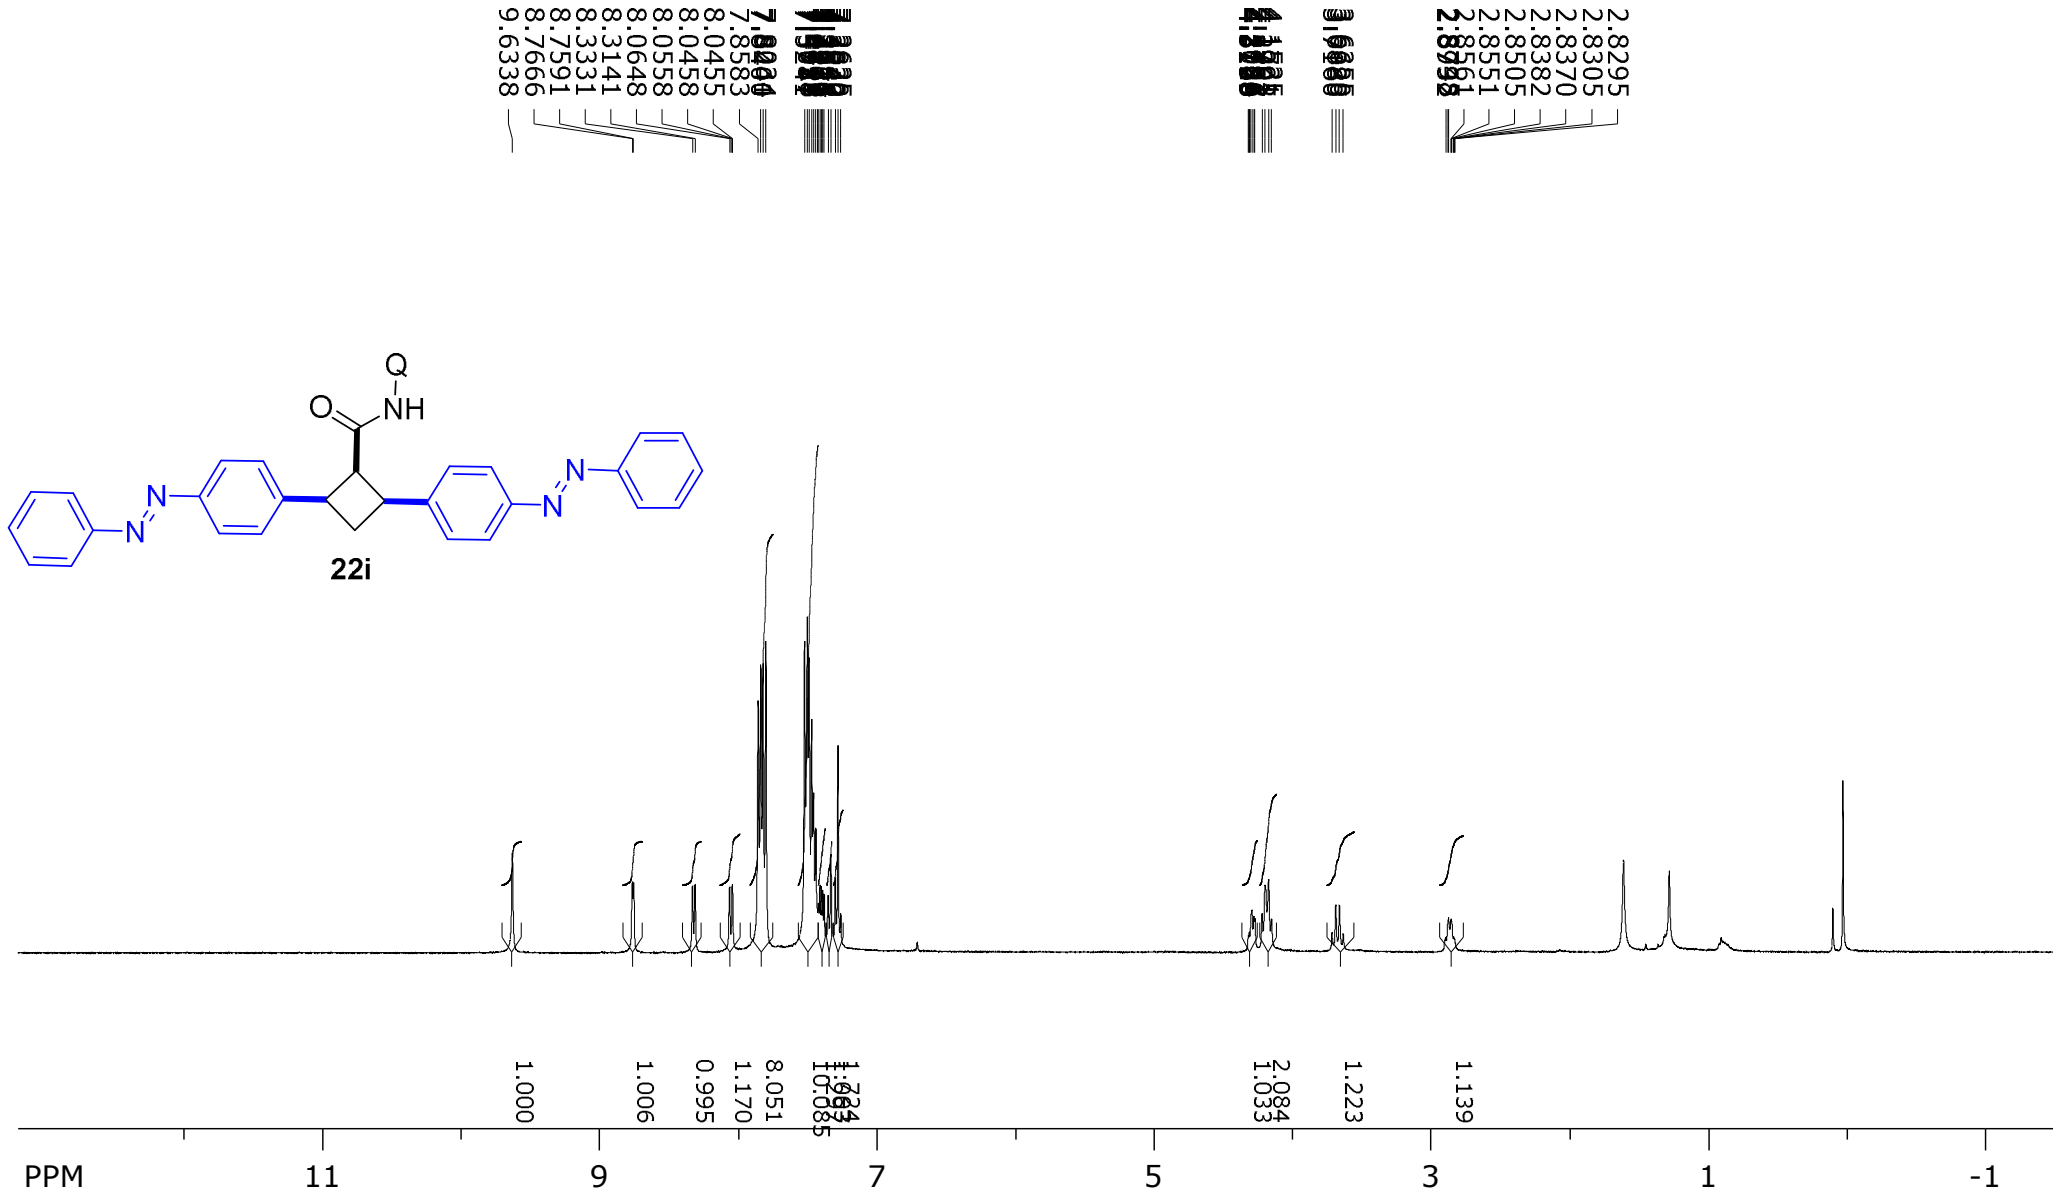

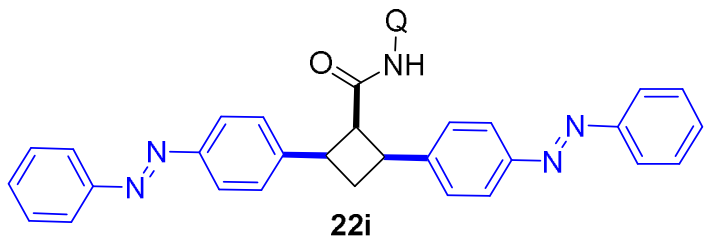

9.6338

8.7591  
8.7666

8.3141  
8.3331

8.0455  
8.0458  
8.0558  
8.0648

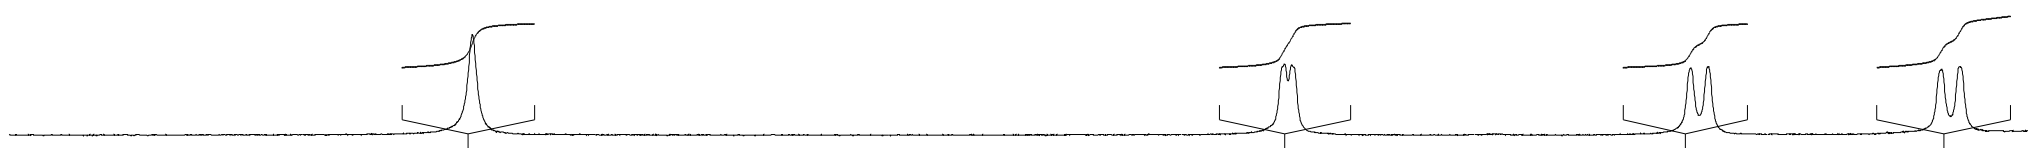

1.000

1.006

0.995

1.170

PPM

9.6

9.2

8.8

8.4

8.0

7.8034  
7.8241  
7.8400  
7.8583

7.2625  
7.2830  
7.3020  
7.3340  
7.3534  
7.3818  
7.3925  
7.4025  
7.4131  
7.4238  
7.4419  
7.4591  
7.4726  
7.4918  
7.5037  
7.5241

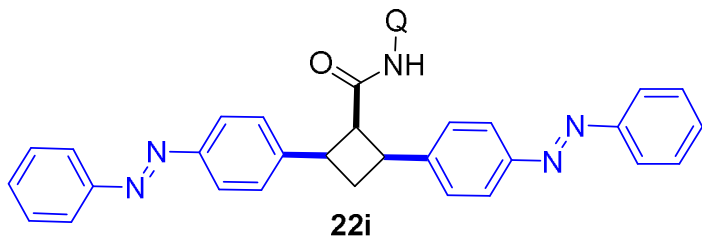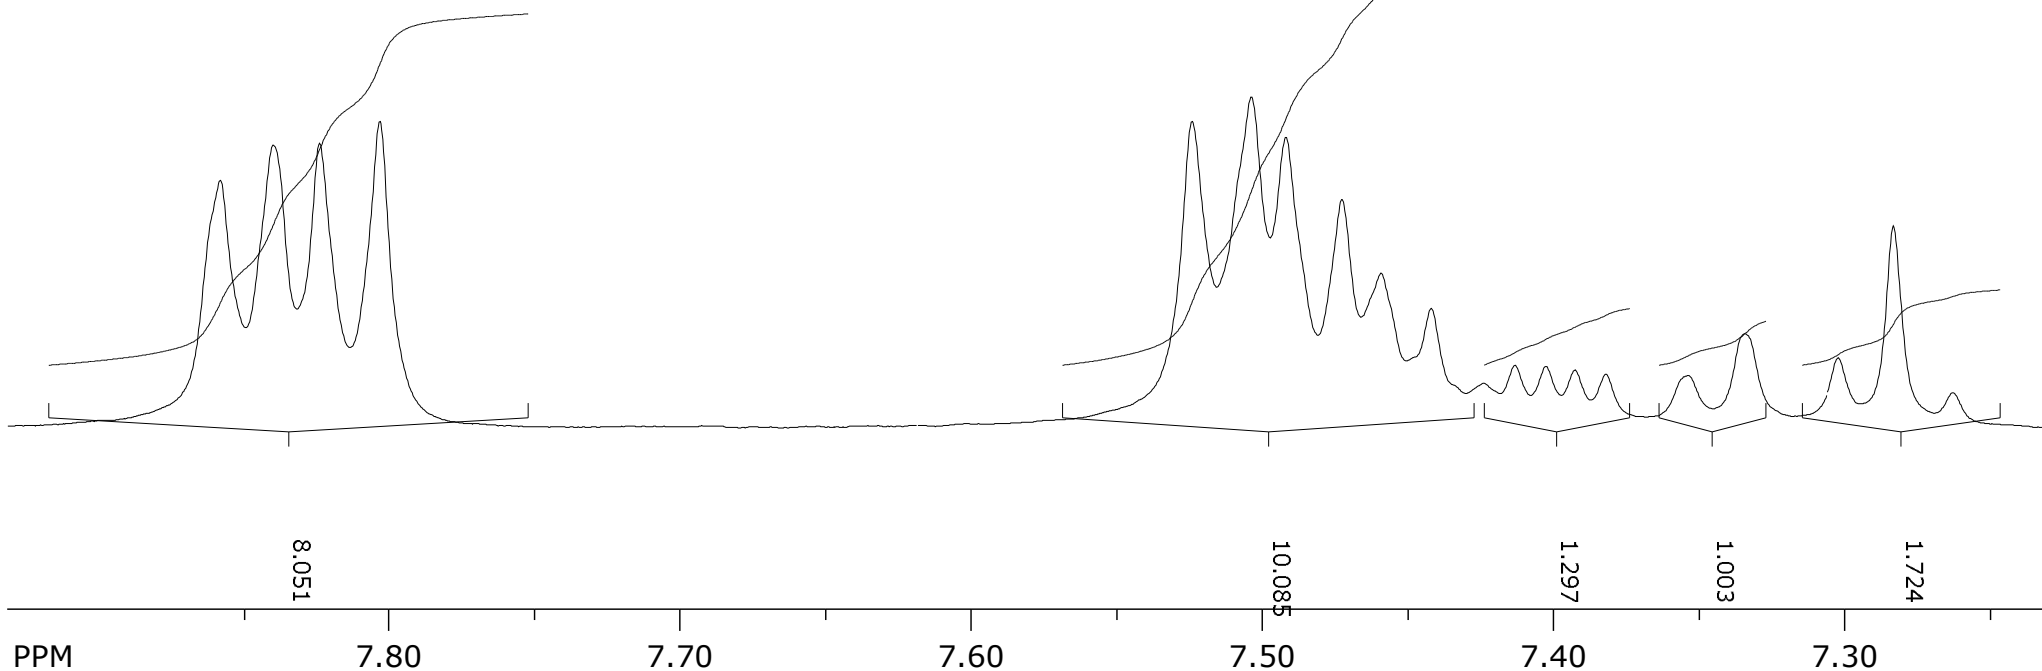

PPM

7.80

7.70

7.60

7.50

7.40

7.30

SpinWorks 4: SS-304-P2-REP

4.2727  
4.2796  
4.2934  
4.3086  
4.3125  
4.3168  
4.3199

4.2201  
4.1995  
4.1731  
4.1525

3.7160  
3.6885  
3.6620  
3.6355

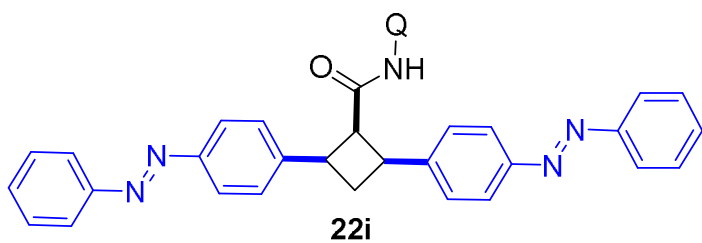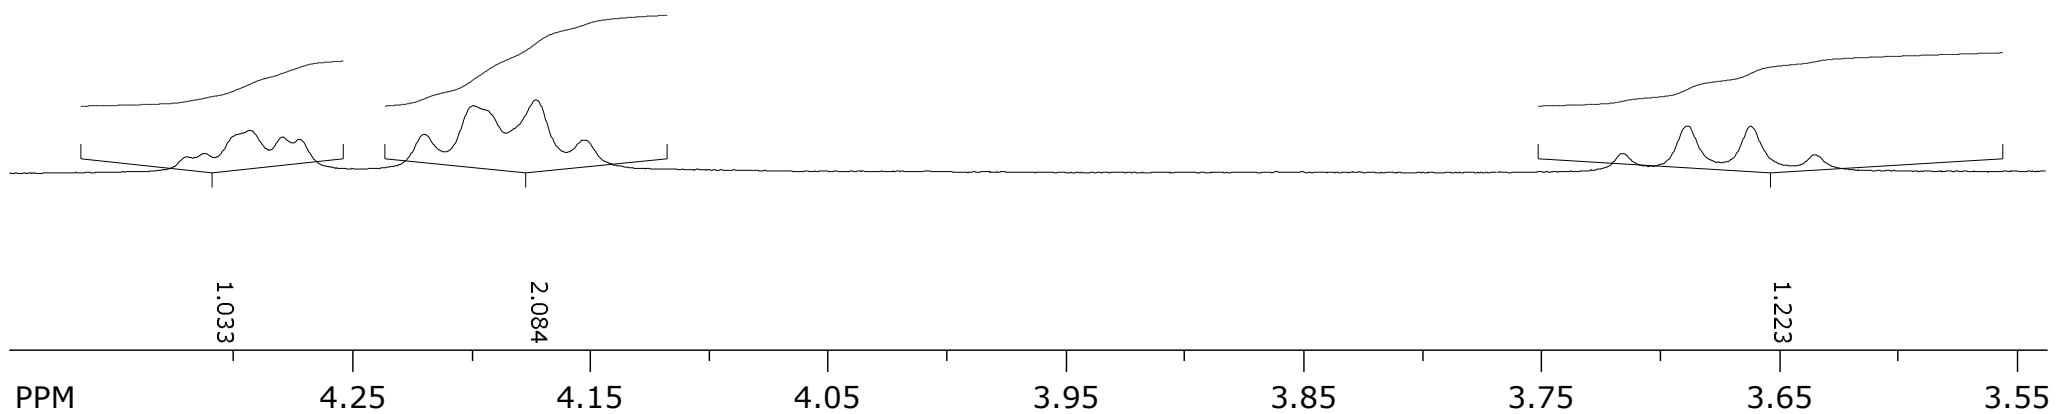

2.8295  
2.8305  
2.8370  
2.8382  
2.8505  
2.8551  
2.8561  
2.8745  
2.8798  
2.8932

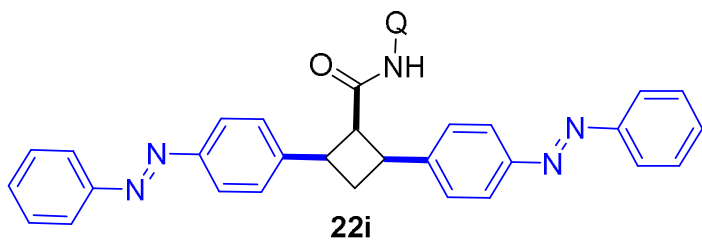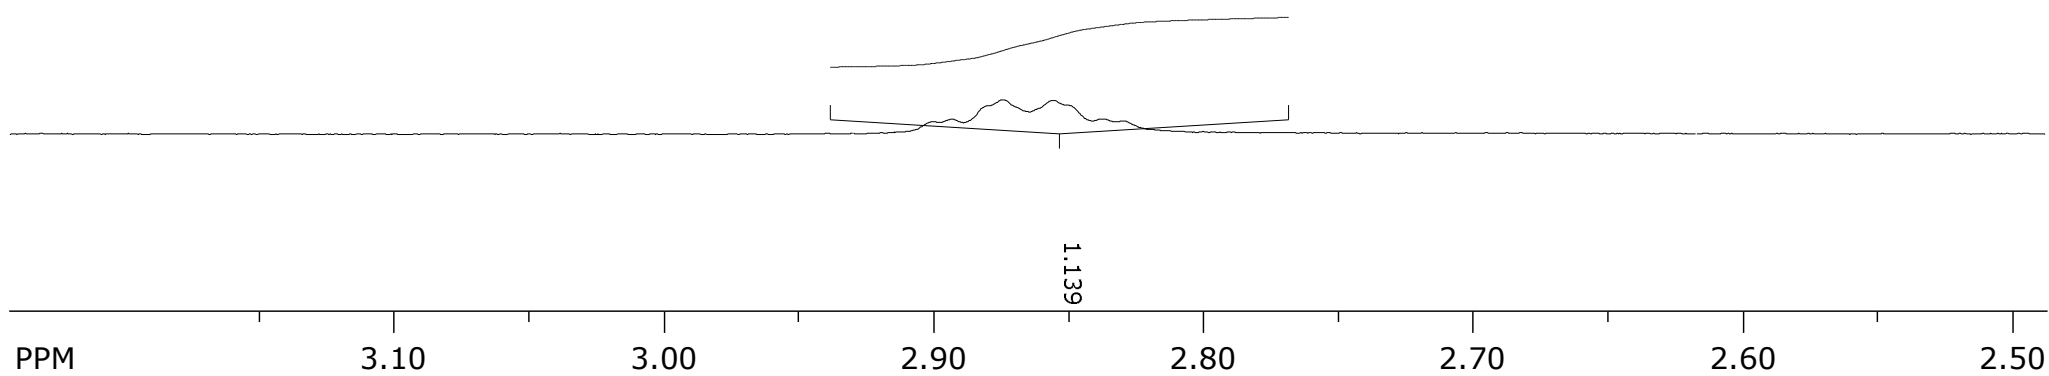

SpinWorks 4: SV100707  
C13CPD CDCl3 {D:\Spectra} nmr 7

SS-304

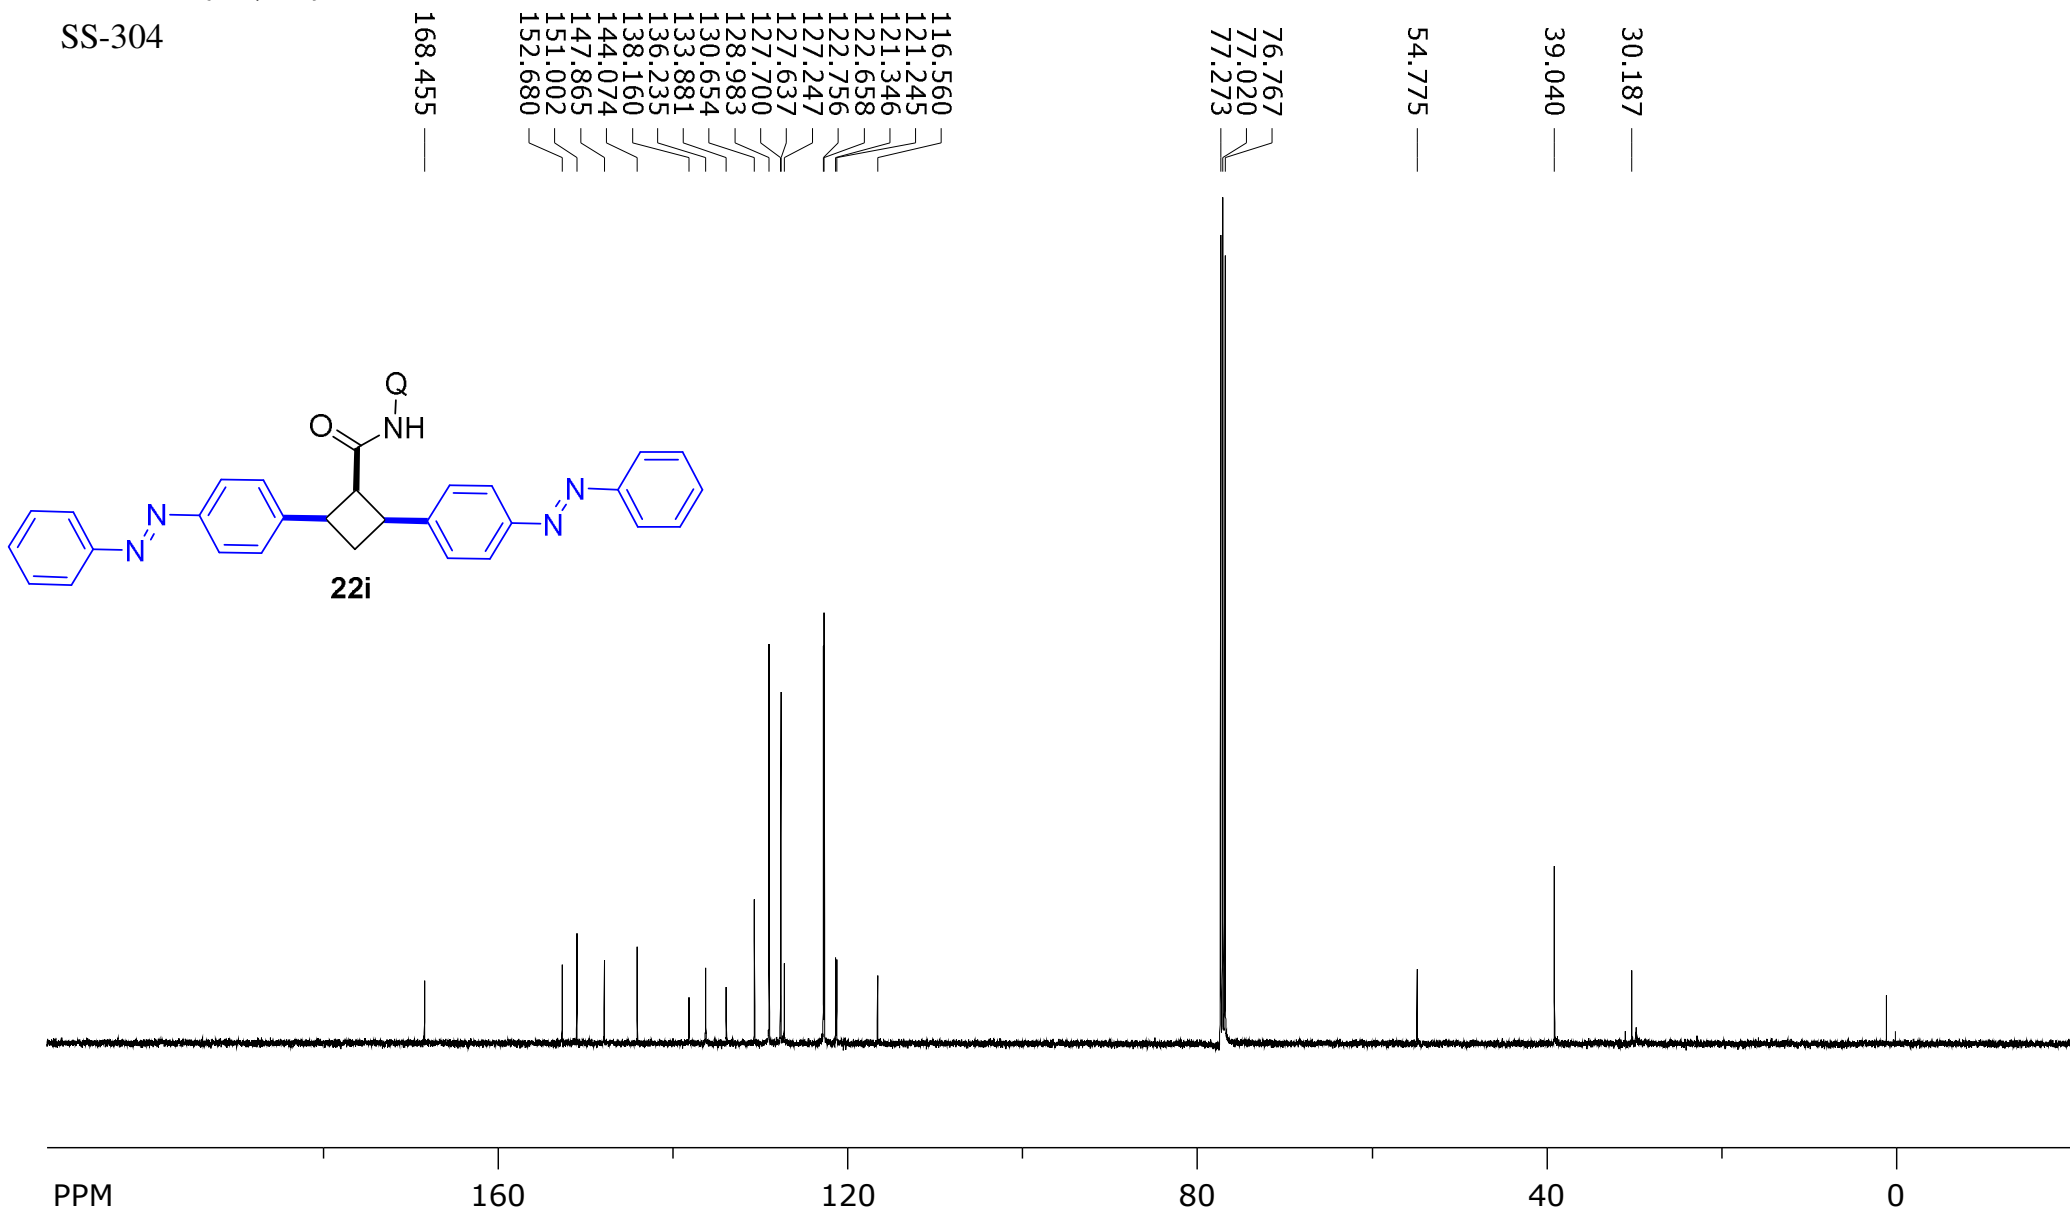

SS-190

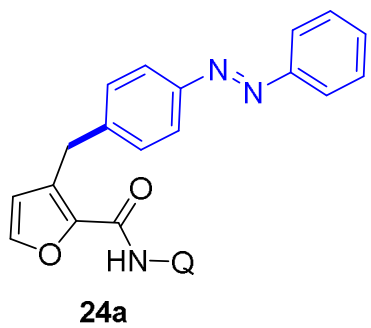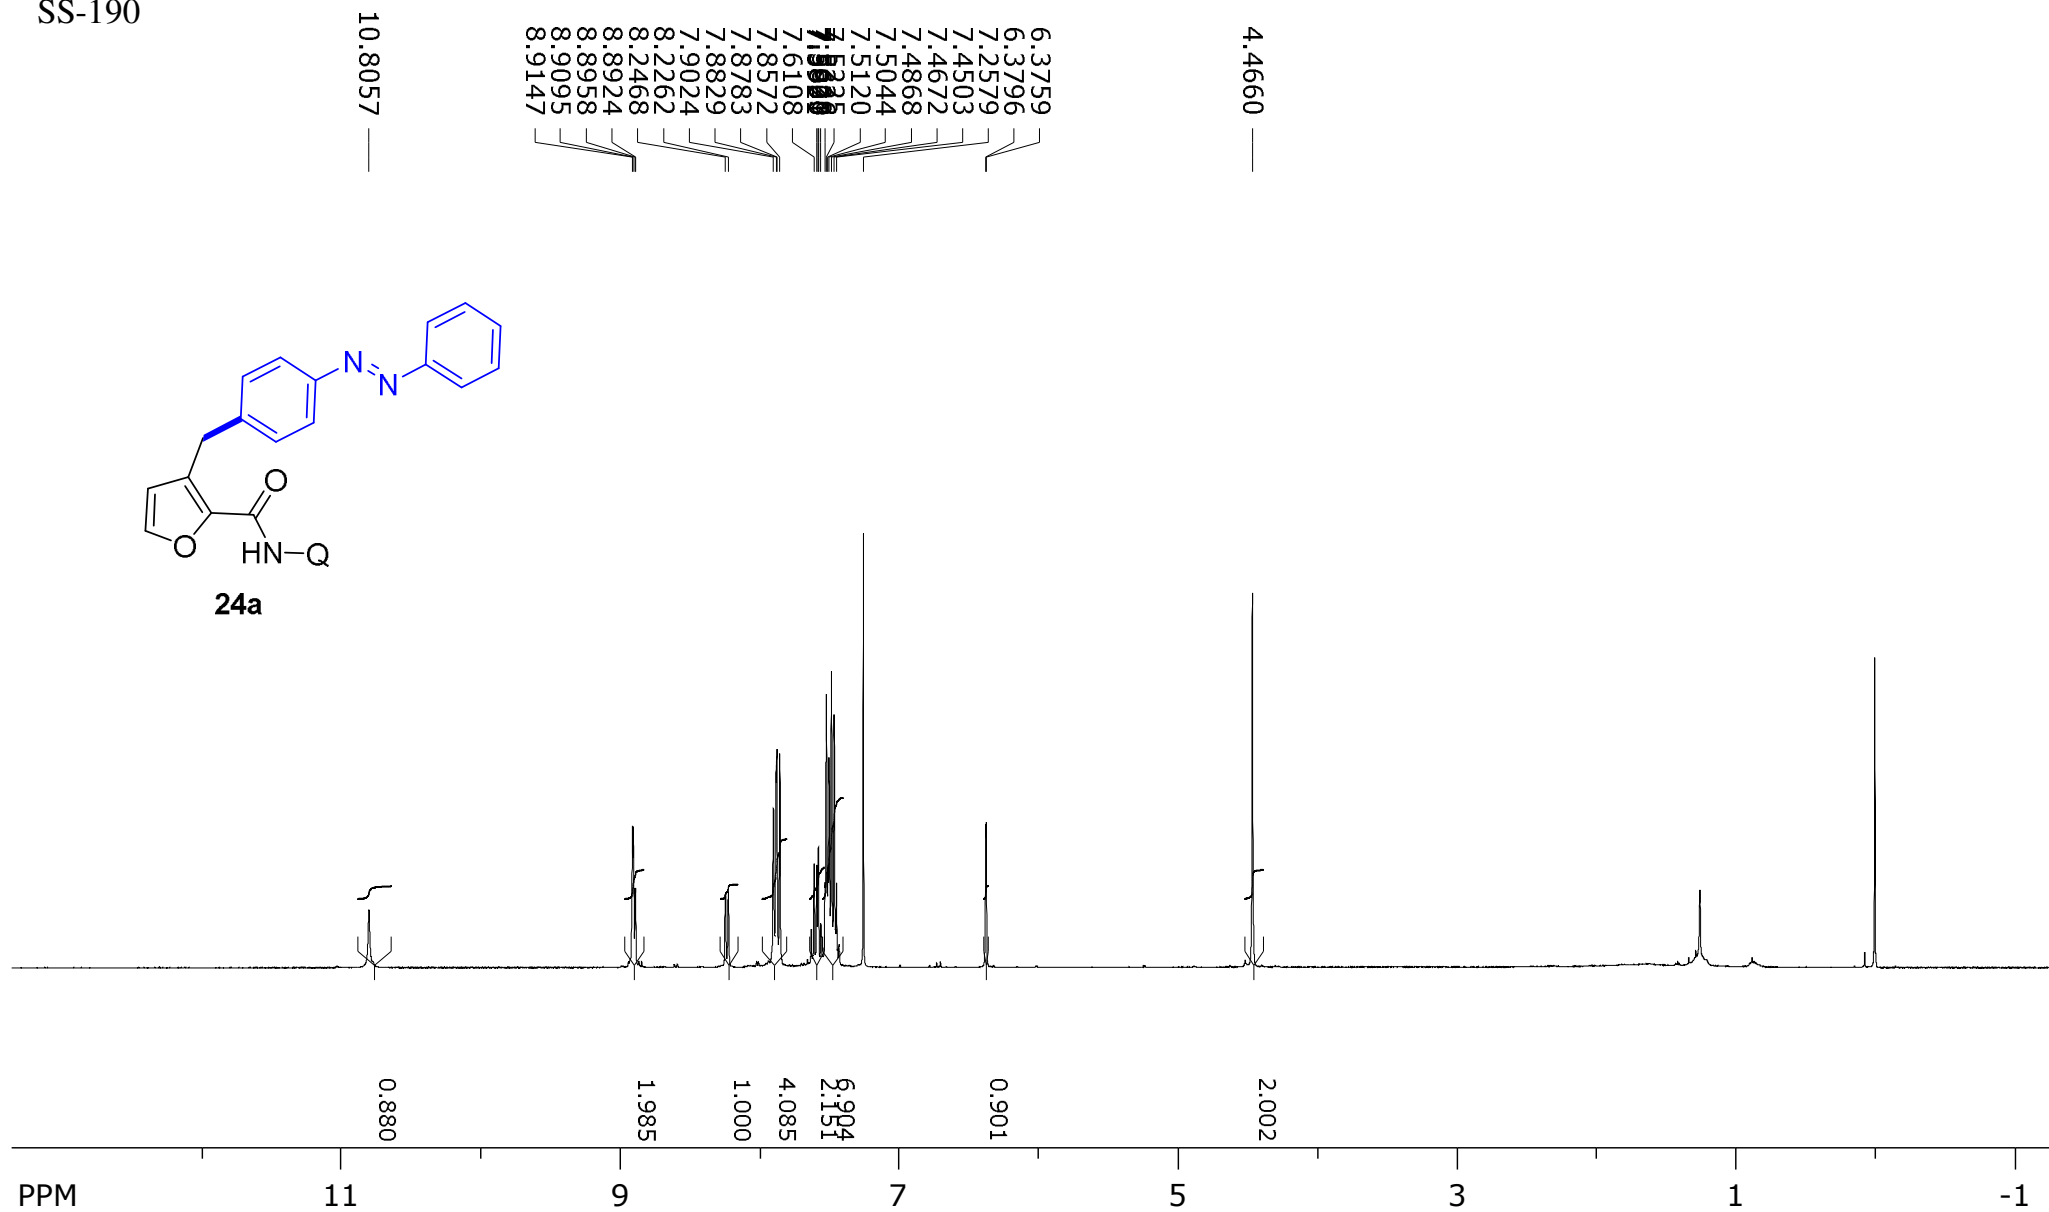

8.8924  
8.8958  
8.9095  
8.9147

8.2262  
8.2468

7.8572  
7.8783  
7.8829  
7.9024

7.4503  
7.4672  
7.4868  
7.5044  
7.5120  
7.5225  
7.5326  
7.5628  
7.5803  
7.5830  
7.5921  
7.6108

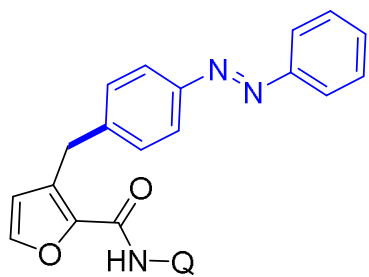

24a

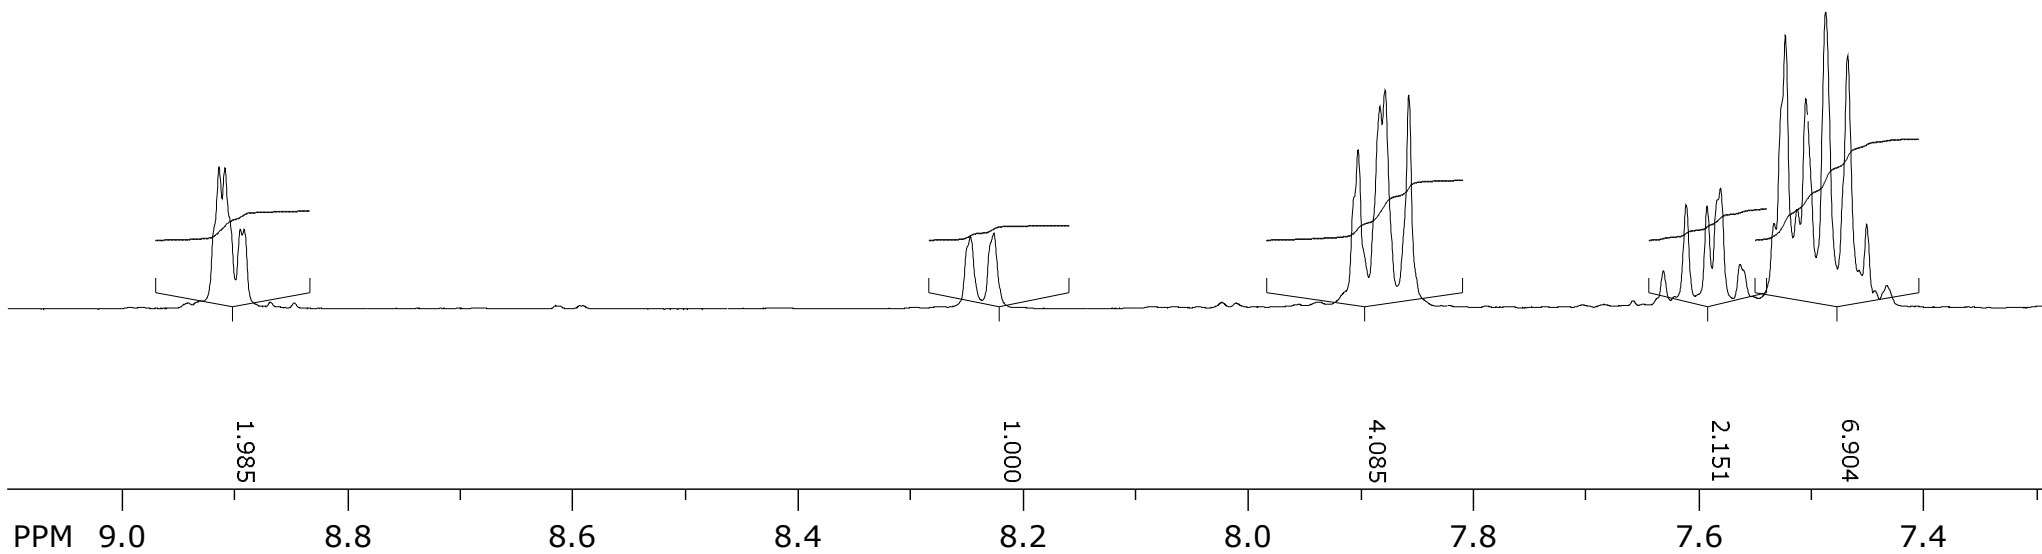



6.3759  
6.3796

4.4660

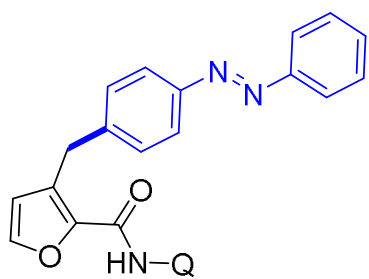

24a

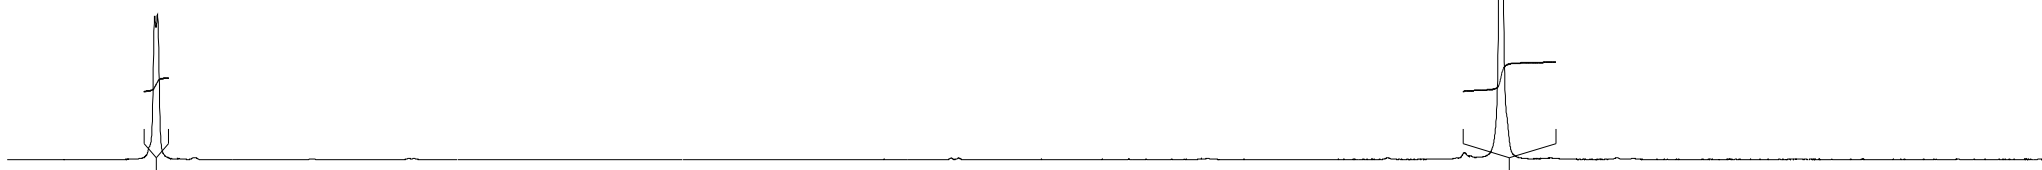

0.901

2.002

PPM

6.0

5.6

5.2

4.8

4.4

4.0

SpinWorks 4: SS190 P  
C13CPD256 CDCl3 /opt/topspin3.5pl2/nmrdata nmrsu 49

114.592  
116.547  
121.728  
121.752  
122.796  
123.152  
127.404  
128.083  
129.081  
129.633  
130.827  
131.499  
134.374  
136.377  
138.738  
142.483  
143.375  
148.431  
151.322  
152.720  
157.609

76.756  
77.073  
77.391

31.471



24a

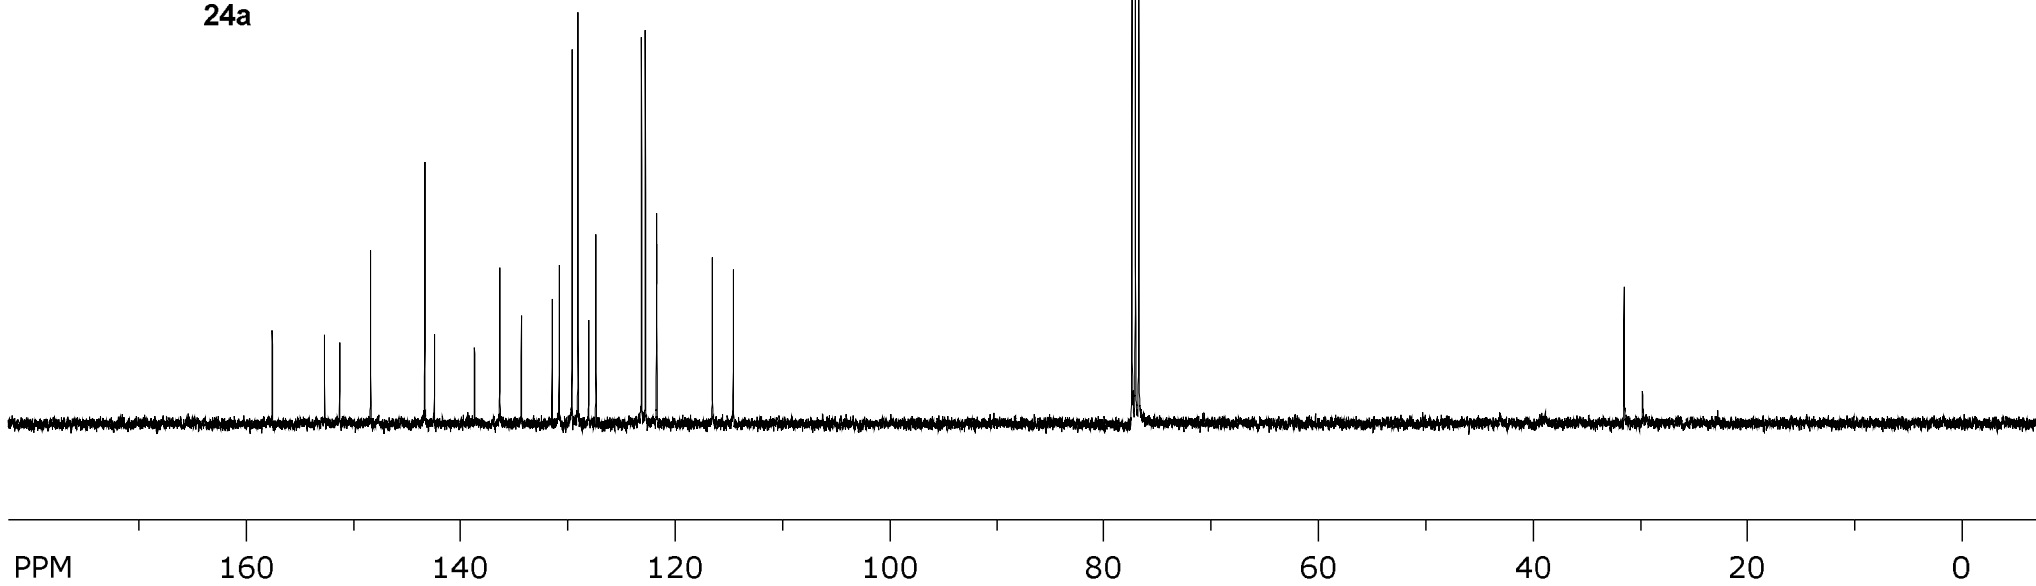

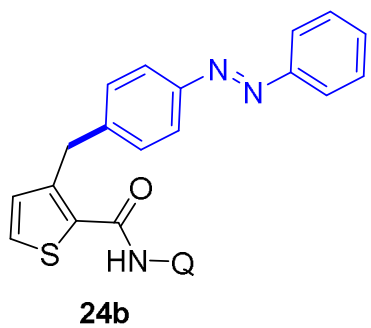

|         |        |        |        |        |        |        |        |        |        |        |        |        |        |        |        |        |
|---------|--------|--------|--------|--------|--------|--------|--------|--------|--------|--------|--------|--------|--------|--------|--------|--------|
| 10.5008 | 8.8960 | 8.8923 | 8.8775 | 8.8739 | 8.8080 | 8.8041 | 8.7936 | 8.2009 | 7.9907 | 7.4728 | 7.4662 | 7.4367 | 7.4240 | 7.2837 | 6.9500 | 4.6296 |
|---------|--------|--------|--------|--------|--------|--------|--------|--------|--------|--------|--------|--------|--------|--------|--------|--------|

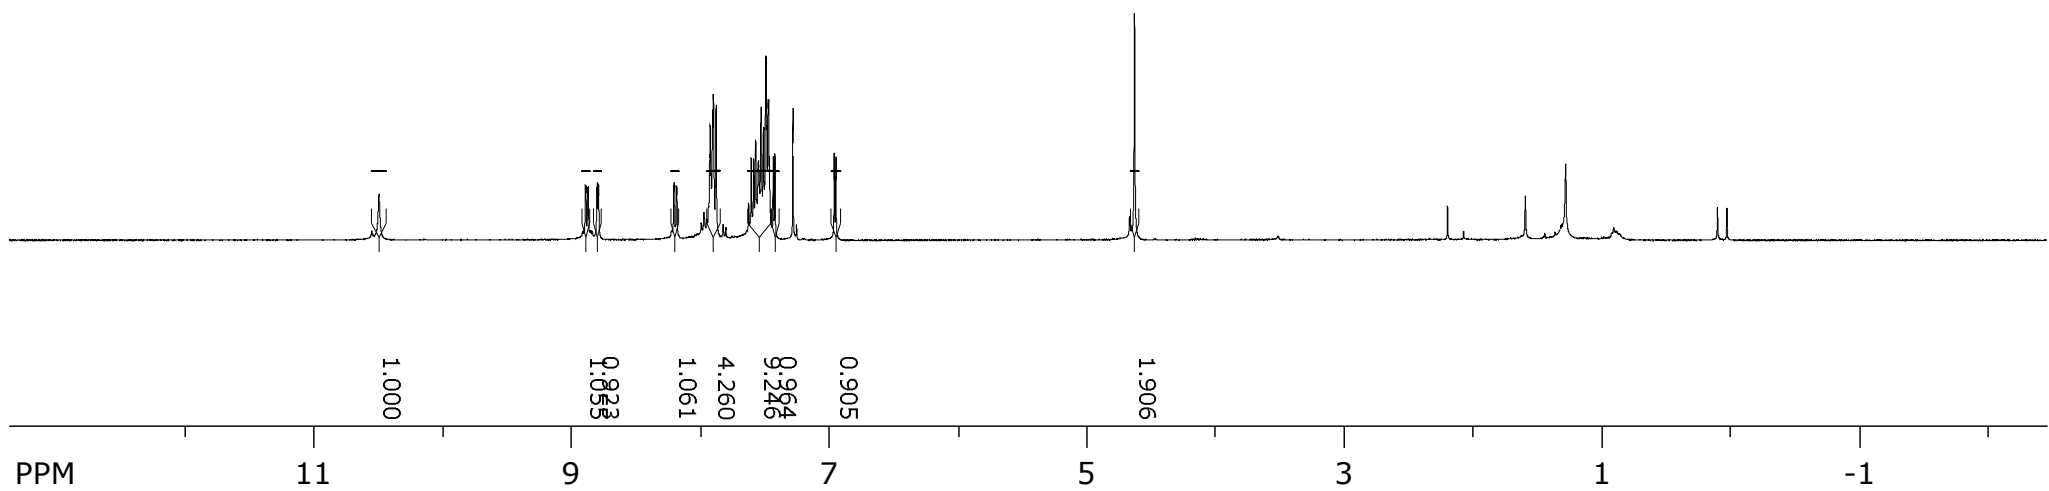

SpinWorks 4: ss-179-p

8.8739  
8.8775  
8.8923  
8.8960

8.7936  
8.7976  
8.8041  
8.8080

8.1861  
8.1899  
8.2067  
8.2105

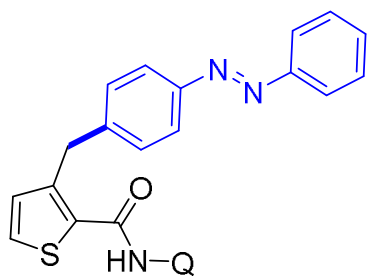

24b

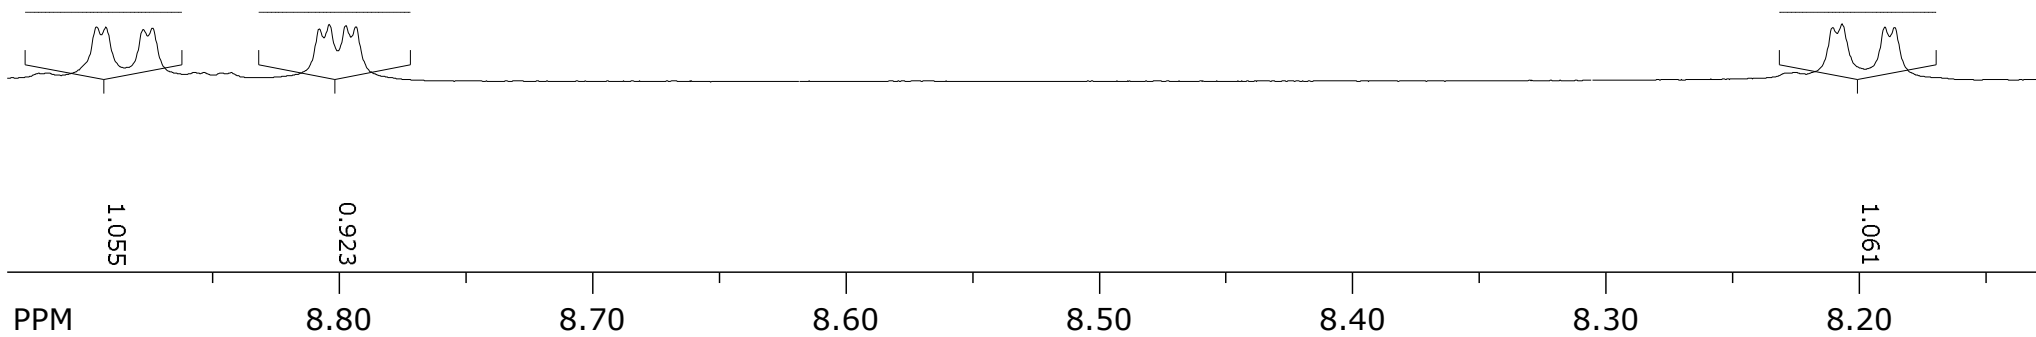

7.9017  
7.9063  
7.9082  
7.9209  
7.9263  
7.9300  
7.9402  
7.8807

7.4240  
7.4367  
7.4662  
7.4728  
7.4767  
7.4871  
7.4936  
7.5127  
7.5317  
7.5444  
7.5492  
7.5525  
7.5558  
7.5656  
7.5730  
7.5767  
7.5892  
7.6077  
7.6282

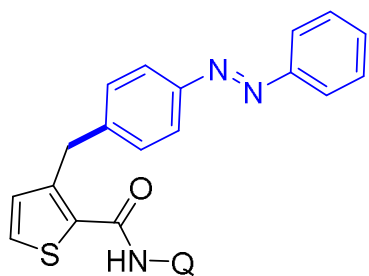

24b

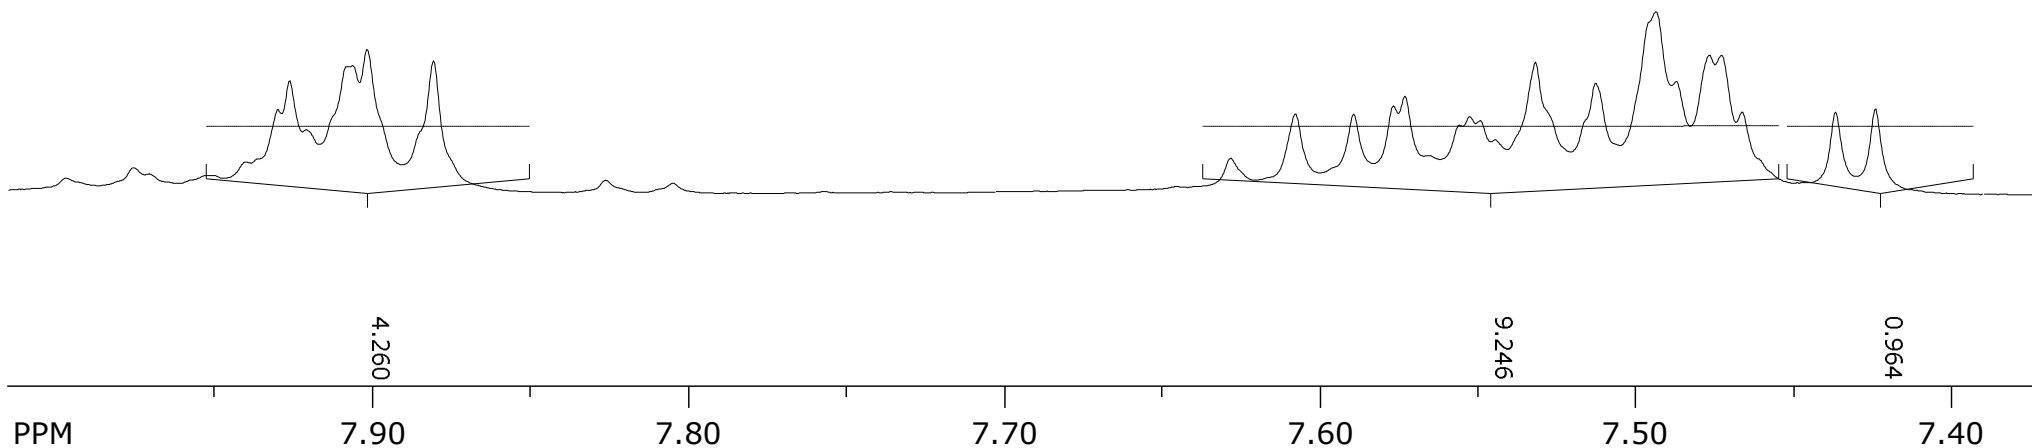

6.9500  
6.9627

4.6296

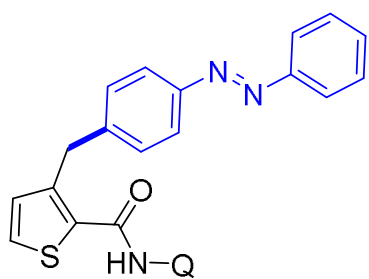

**24b**

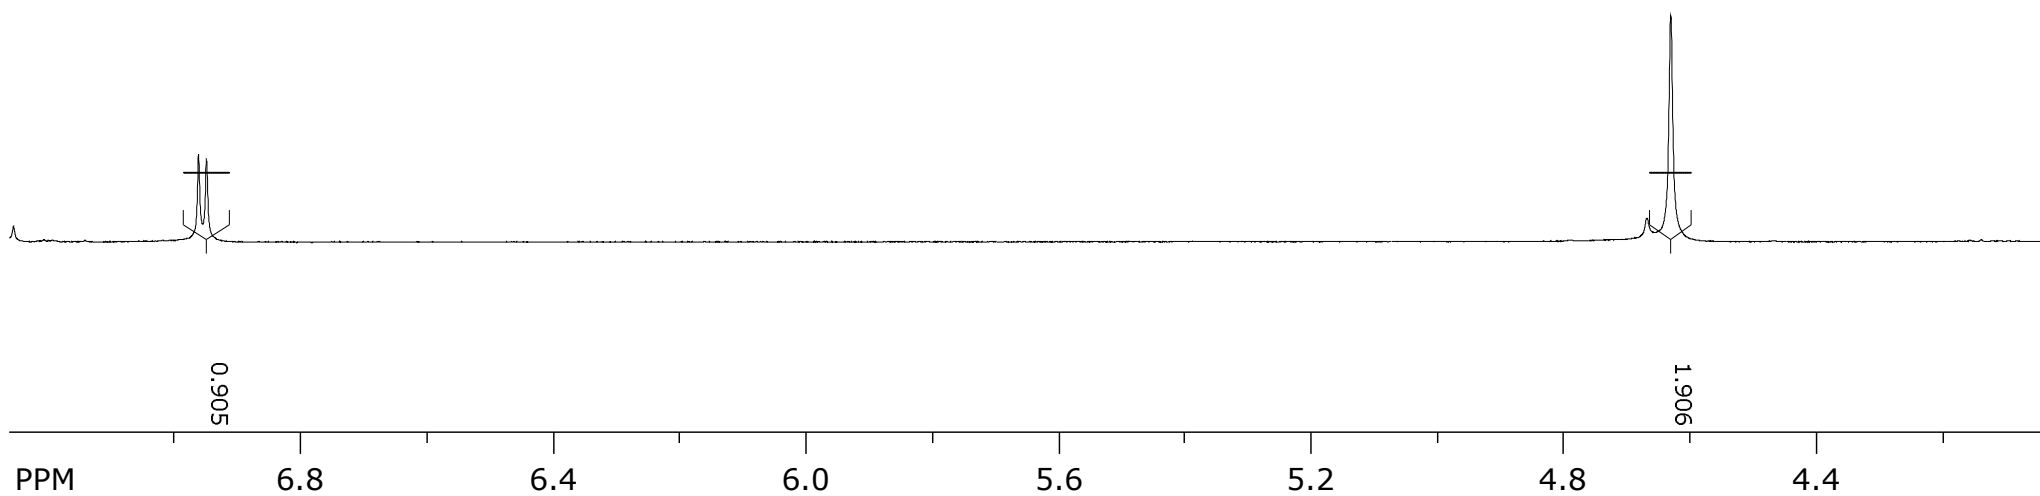

SpinWorks 4: SS 179 P  
C13CPD256 CDCl3 /opt/topspin3.5pl2/nmrdata nmrsu 24

116.628  
121.744  
121.801  
122.796  
123.147  
127.415  
127.577  
127.981  
129.086  
129.662  
130.841  
131.552  
132.298  
134.590  
136.362  
138.581  
143.574  
144.625  
148.353  
151.277  
152.719  
161.052

76.755  
77.072  
77.390

35.234



24b

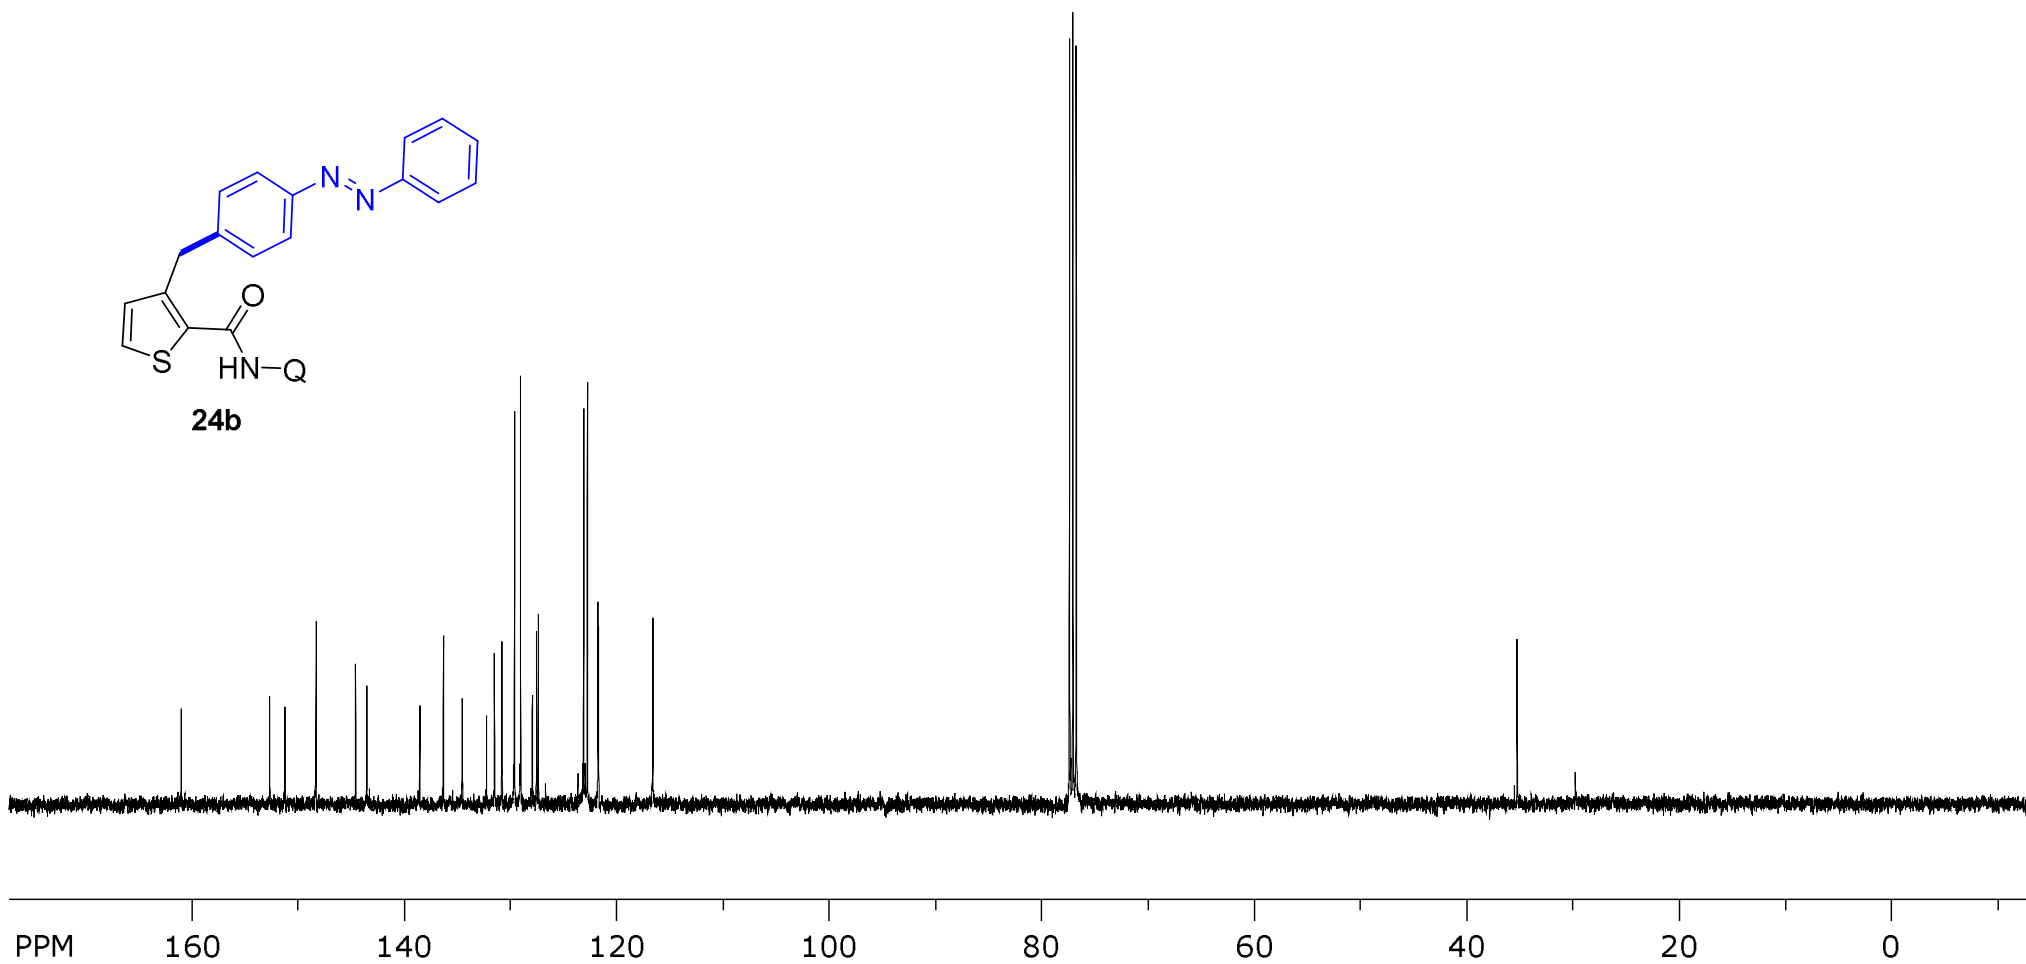

SpinWorks 4: DC-195

SS-180 rep

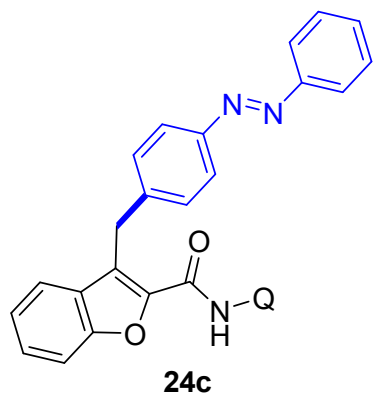

11.1062

7.2389  
7.2564  
7.2765  
7.4350  
7.4406  
7.4521  
7.4590  
7.8276  
7.8485  
7.8598  
7.8781  
8.2315  
8.2521  
8.9558  
8.9611  
8.9661  
8.9719  
8.9775

4.7743

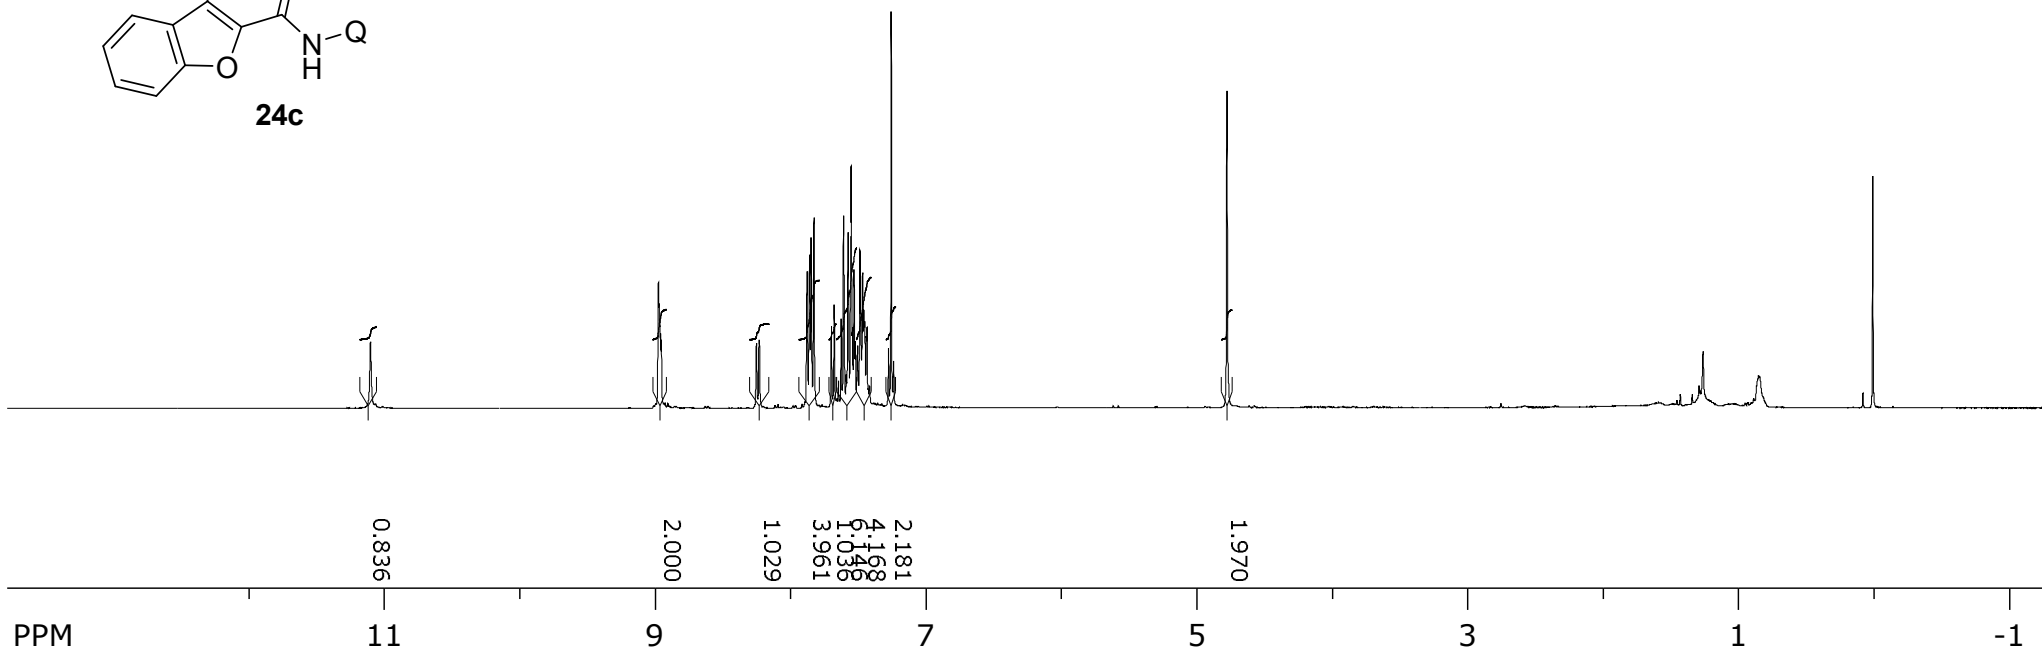



8.9558  
8.9611  
8.9661  
8.9719  
8.9775

8.2315  
8.2521

7.8276  
7.8485  
7.8598  
7.8781

7.2389  
7.2564  
7.2765  
7.4350  
7.4406  
7.4521  
7.4590  
7.4680  
7.4874  
7.5046  
7.5221  
7.5318  
7.5430  
7.5536  
7.5752  
7.6091  
7.6260  
7.6781  
7.6988

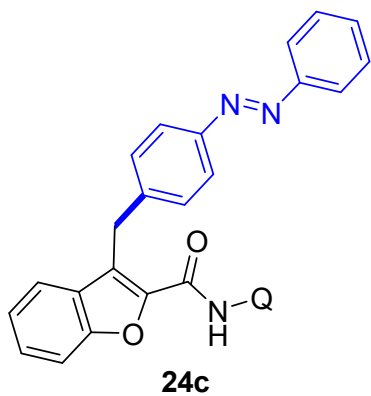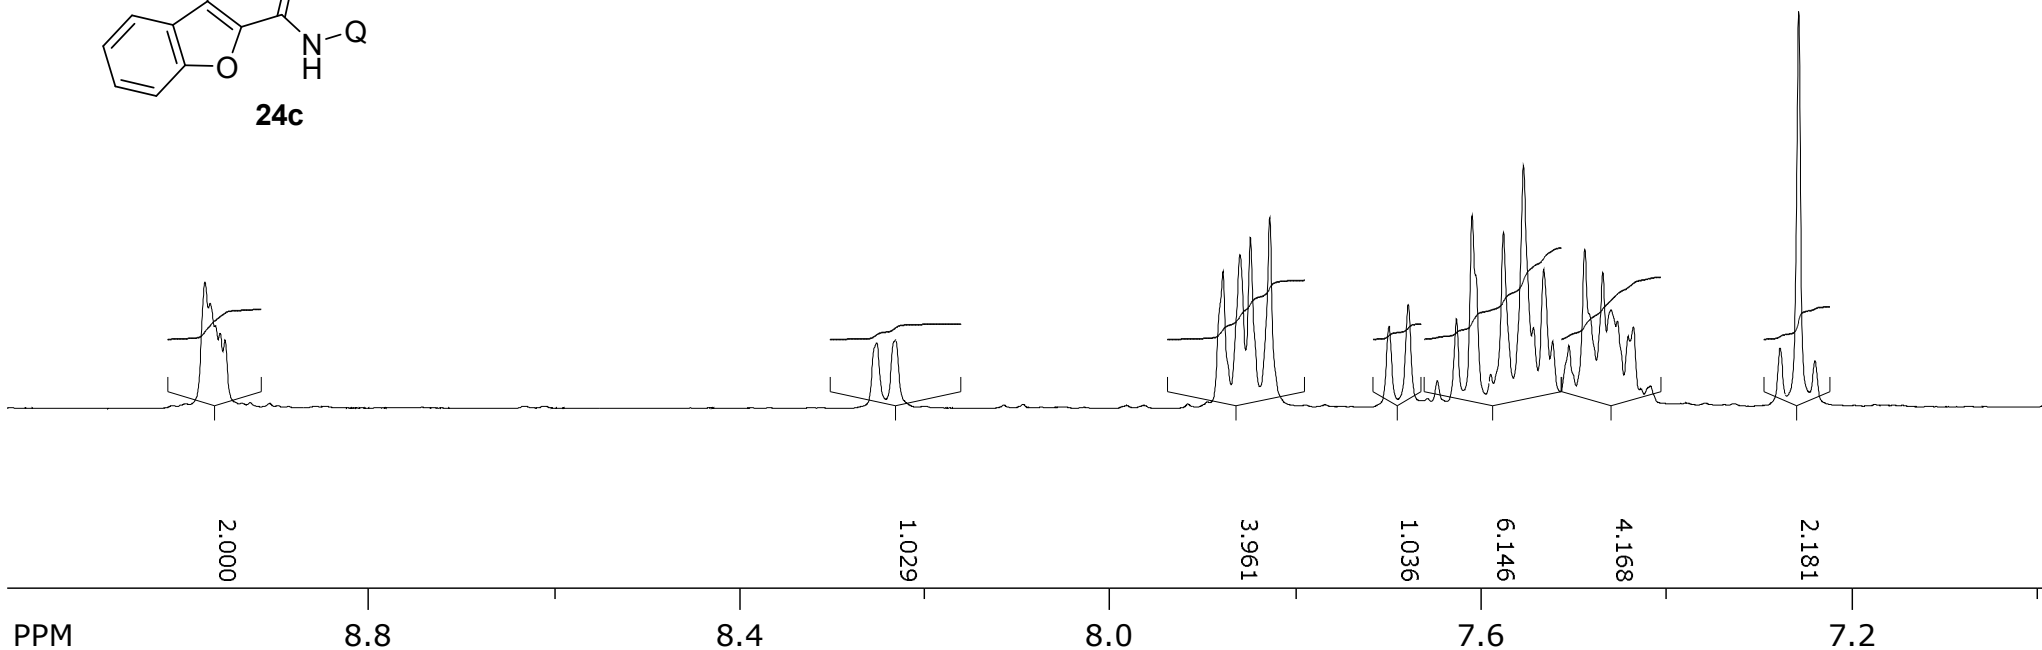



SpinWorks 4: SS 180 P  
C13CPD256 CDCl3 /opt/topspin3.5pl2/nmrdata nmrsu 23

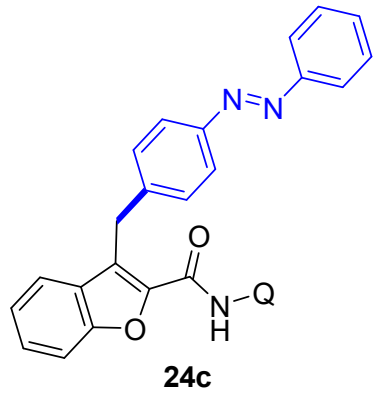

158.225 —  
151.328 —  
152.717 —  
153.789 —  
148.588 —  
142.786 —  
143.450 —  
138.829 —  
136.394 —  
134.234 —  
130.788 —  
129.516 —  
129.054 —  
128.893 —  
128.103 —  
127.431 —  
127.380 —  
125.605 —  
123.496 —  
123.123 —  
122.775 —  
122.154 —  
121.814 —  
121.568 —  
116.956 —  
112.233 —

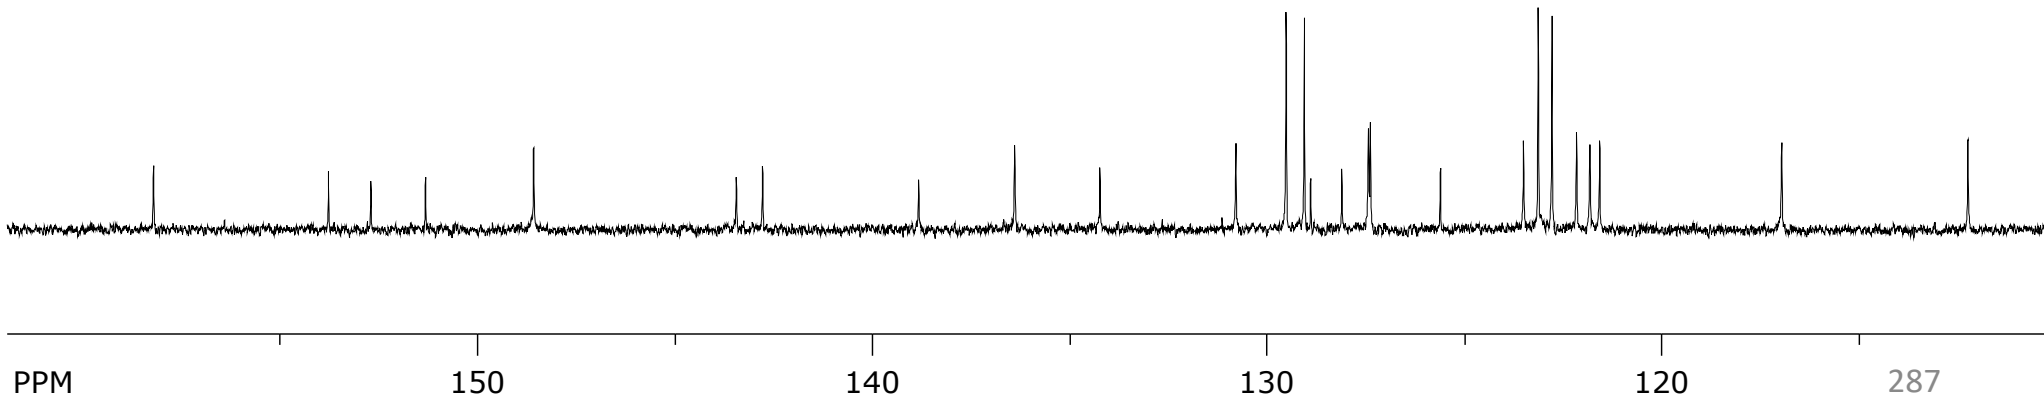

SpinWorks 4: SS-775-REP S1  
PROTON CDCl3 /opt/topspin3.5pl2/nmrdata nmrsu 32

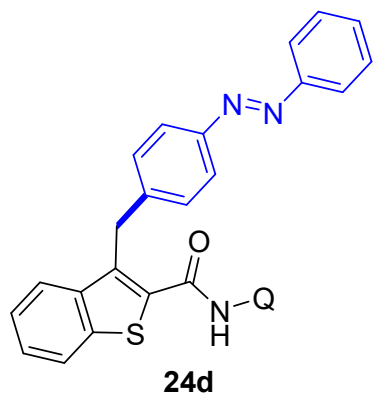

10.6575  
8.7433  
8.7474  
8.7539  
8.7580  
8.9090  
8.9138  
8.9266  
8.9314  
9.2894  
9.2914  
9.2934  
9.2954  
9.2974  
7.4305  
7.4279  
7.4102  
7.4080  
7.3926  
7.3897  
7.2838  
4.9013

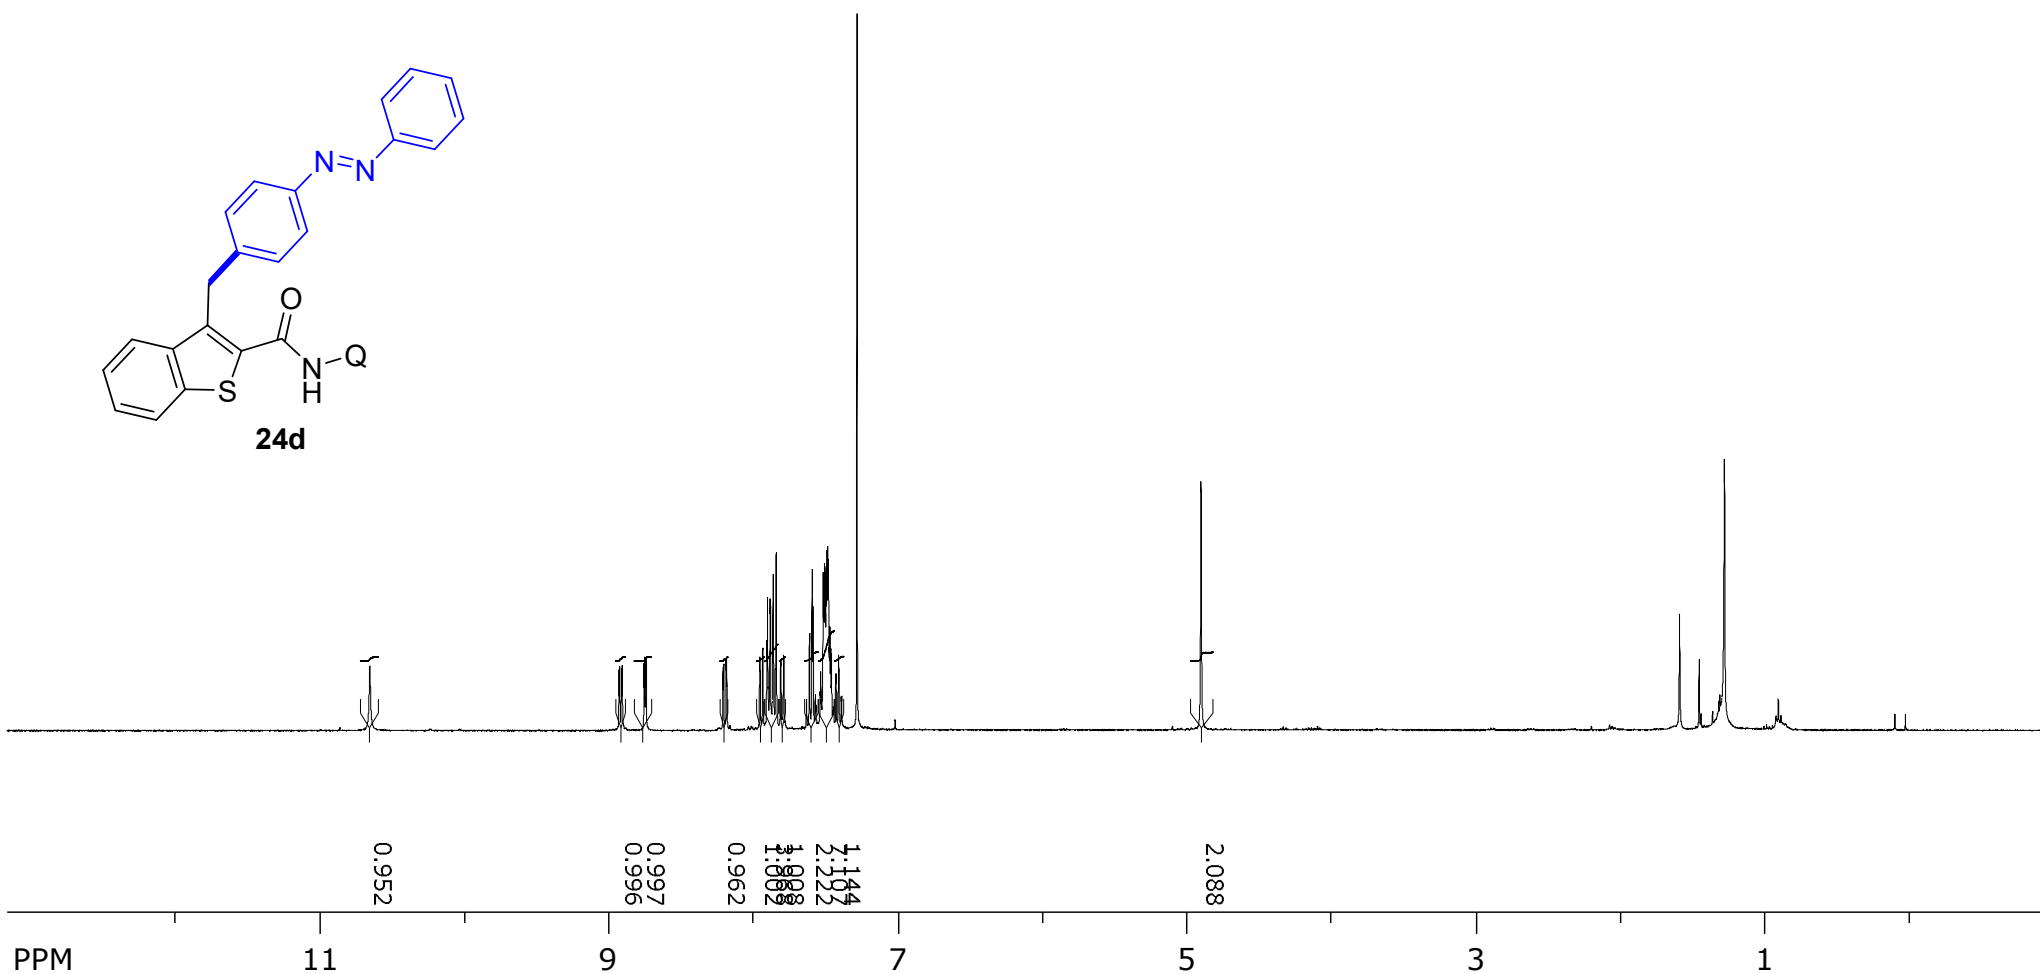

SpinWorks 4: SS-775-REP S1  
PROTON CDCl3 /opt/topspin3.5pl2/nmrdata nmrsu 32

8.9090  
8.9138  
8.9266  
8.9314

8.7433  
8.7474  
8.7539  
8.7580

8.1856  
8.1897  
8.2064  
8.2104

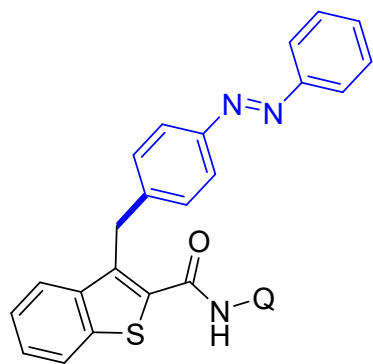

**24d**

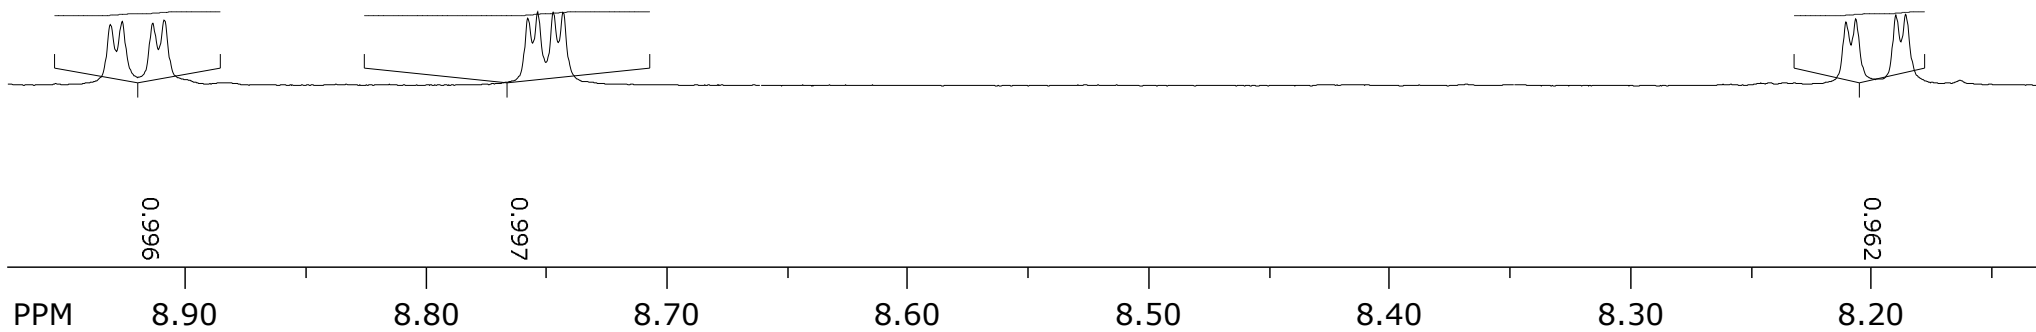

SpinWorks 4: SS-775-REP S1  
PROTON CDCl3 /opt/topspin3.5pl2/nmrdata nmrsu 32

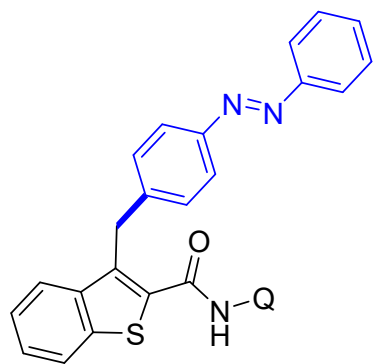

**24d**

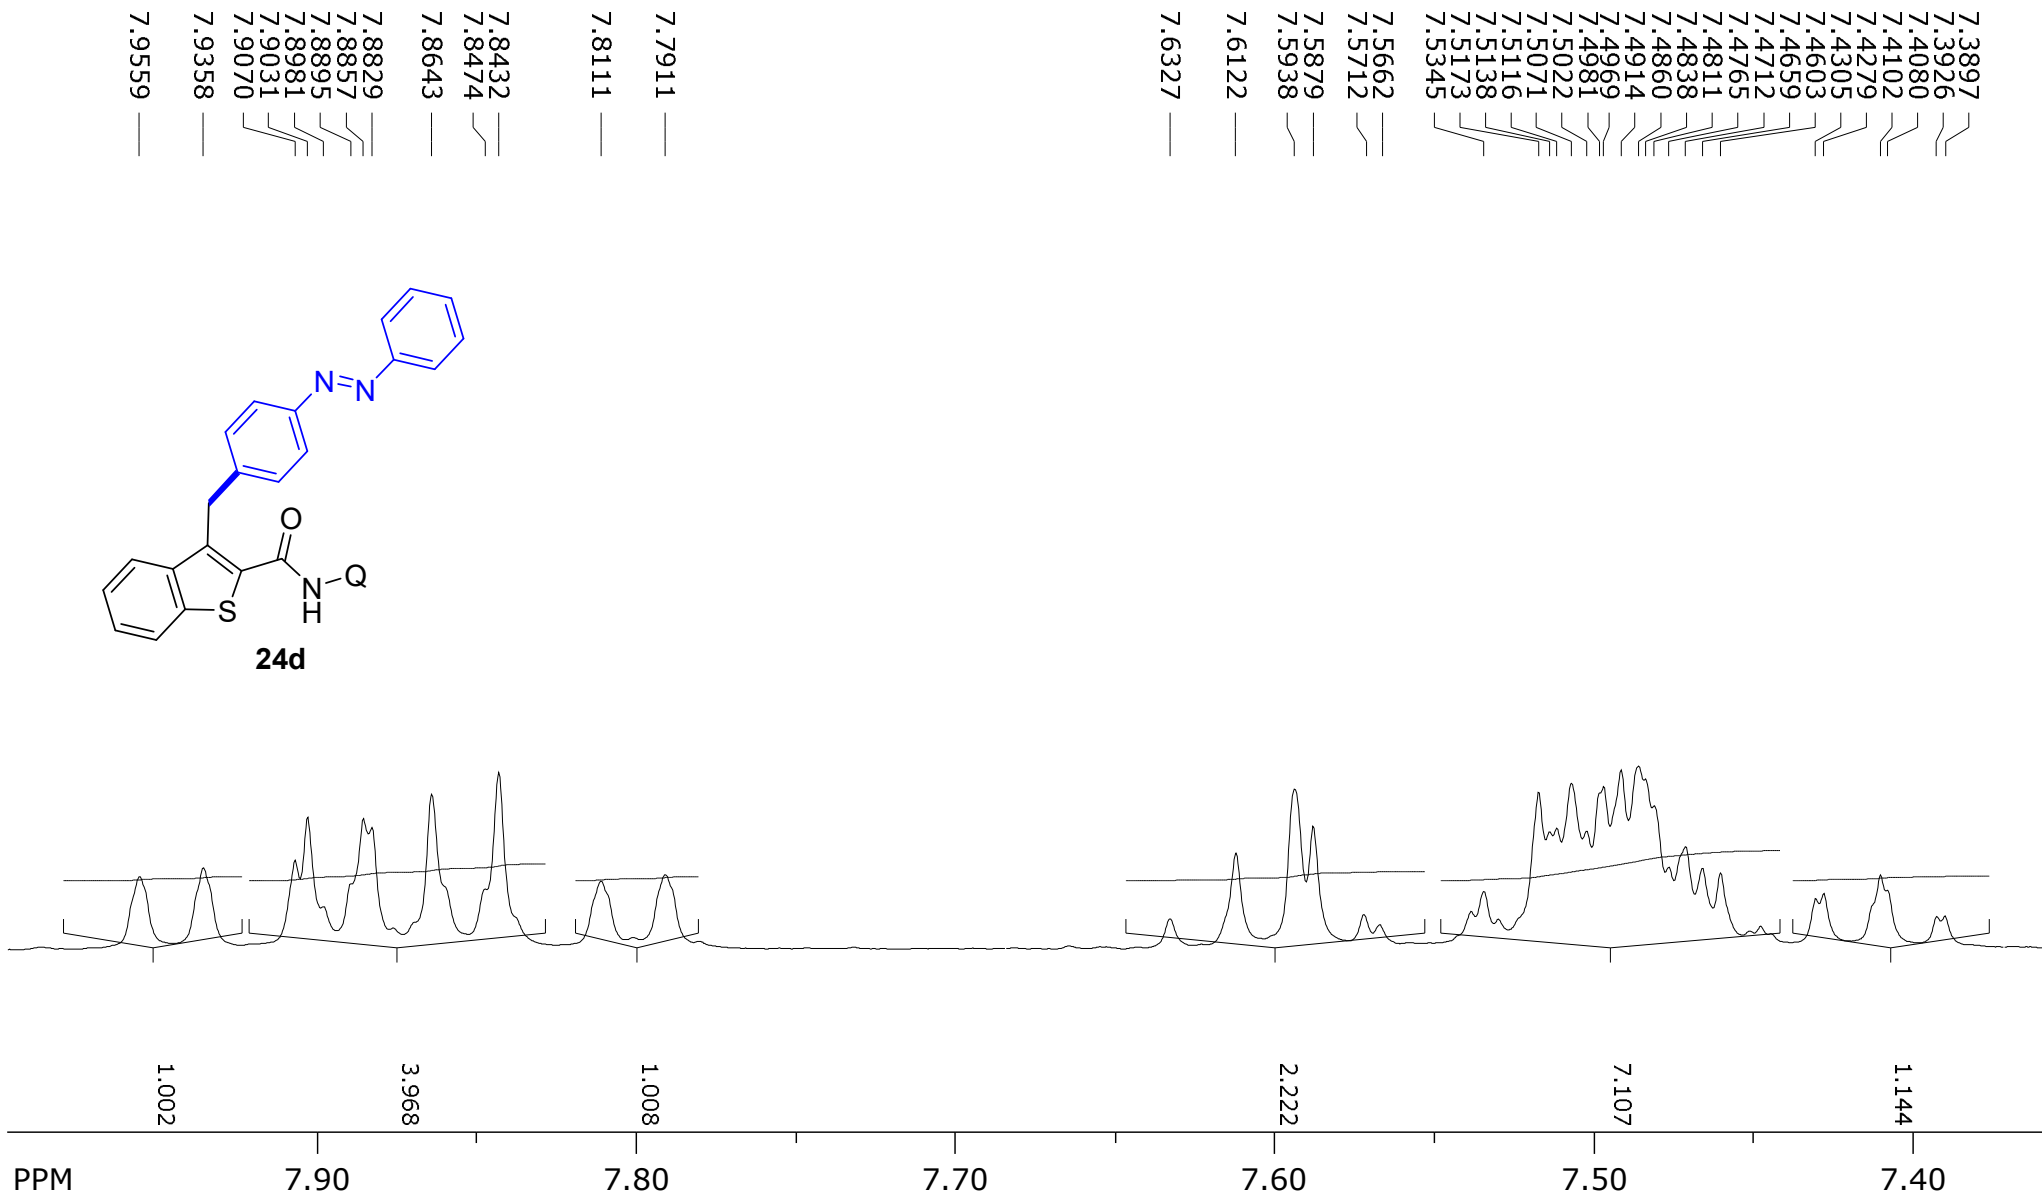

SpinWorks 4: SS-775 REP S1  
C13CPD256 CDCl3 /opt/topspin3.5pl2/nmrdata nmrsu 13



**24d**

116.817  
121.789  
122.093  
122.760  
122.796  
123.115  
123.974  
125.002  
125.002  
130.780  
131.081  
131.423  
136.341  
138.167  
138.580  
139.134  
140.048  
142.736  
148.417  
151.247  
152.705  
161.387

76.722  
77.040  
77.357

32.925

PPM

160

120

80

40

0

SpinWorks 4: SS-775 REP S1  
C13CPD256 CDCl3 /opt/topspin3.5pl2/nmrdata nmrsu 13

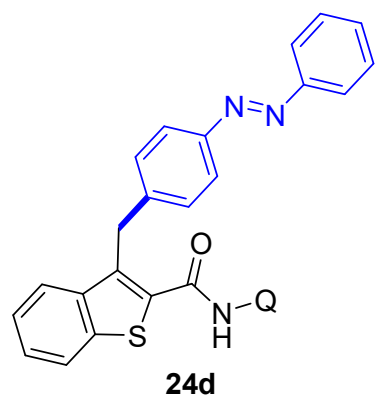

161.387 —  
152.705 —  
151.247 —  
148.417 —  
142.736 —  
140.048 —  
139.134 —  
138.167 —  
136.341 —  
134.423 —  
133.091 —  
130.786 —  
129.188 —  
129.052 —  
128.252 —  
127.958 —  
127.375 —  
126.815 —  
125.009 —  
123.974 —  
123.115 —  
122.796 —  
122.760 —  
122.093 —  
121.789 —  
116.817 —

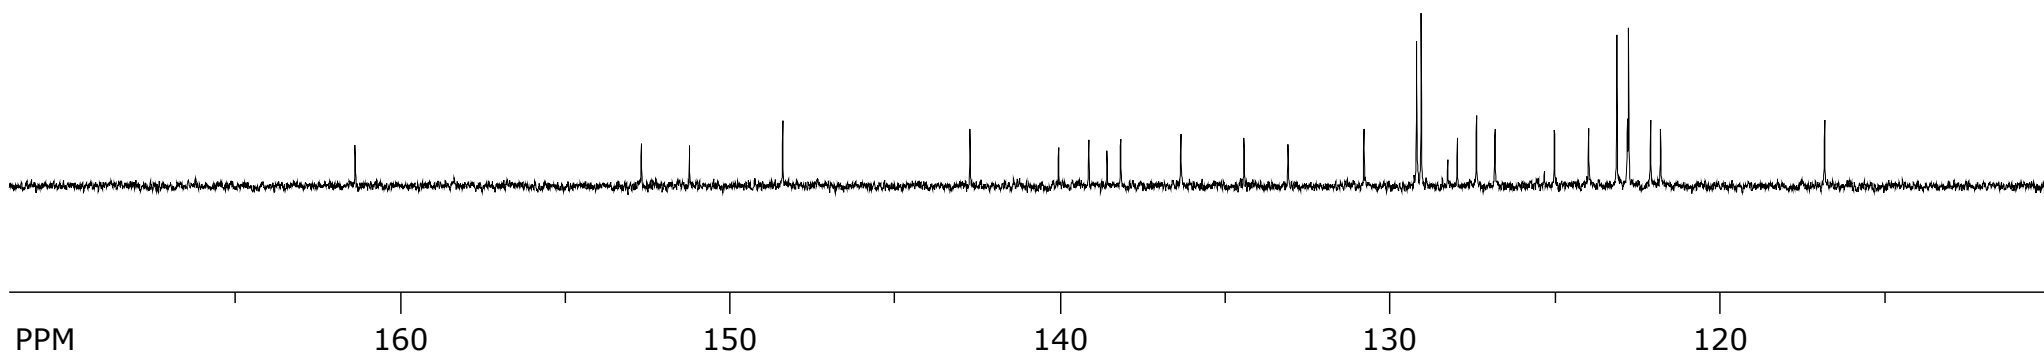



SpinWorks 4: ss-148-p  
PROTON CDCl3 /opt/topspin3.5pl2/nmrdata nmrsu 29

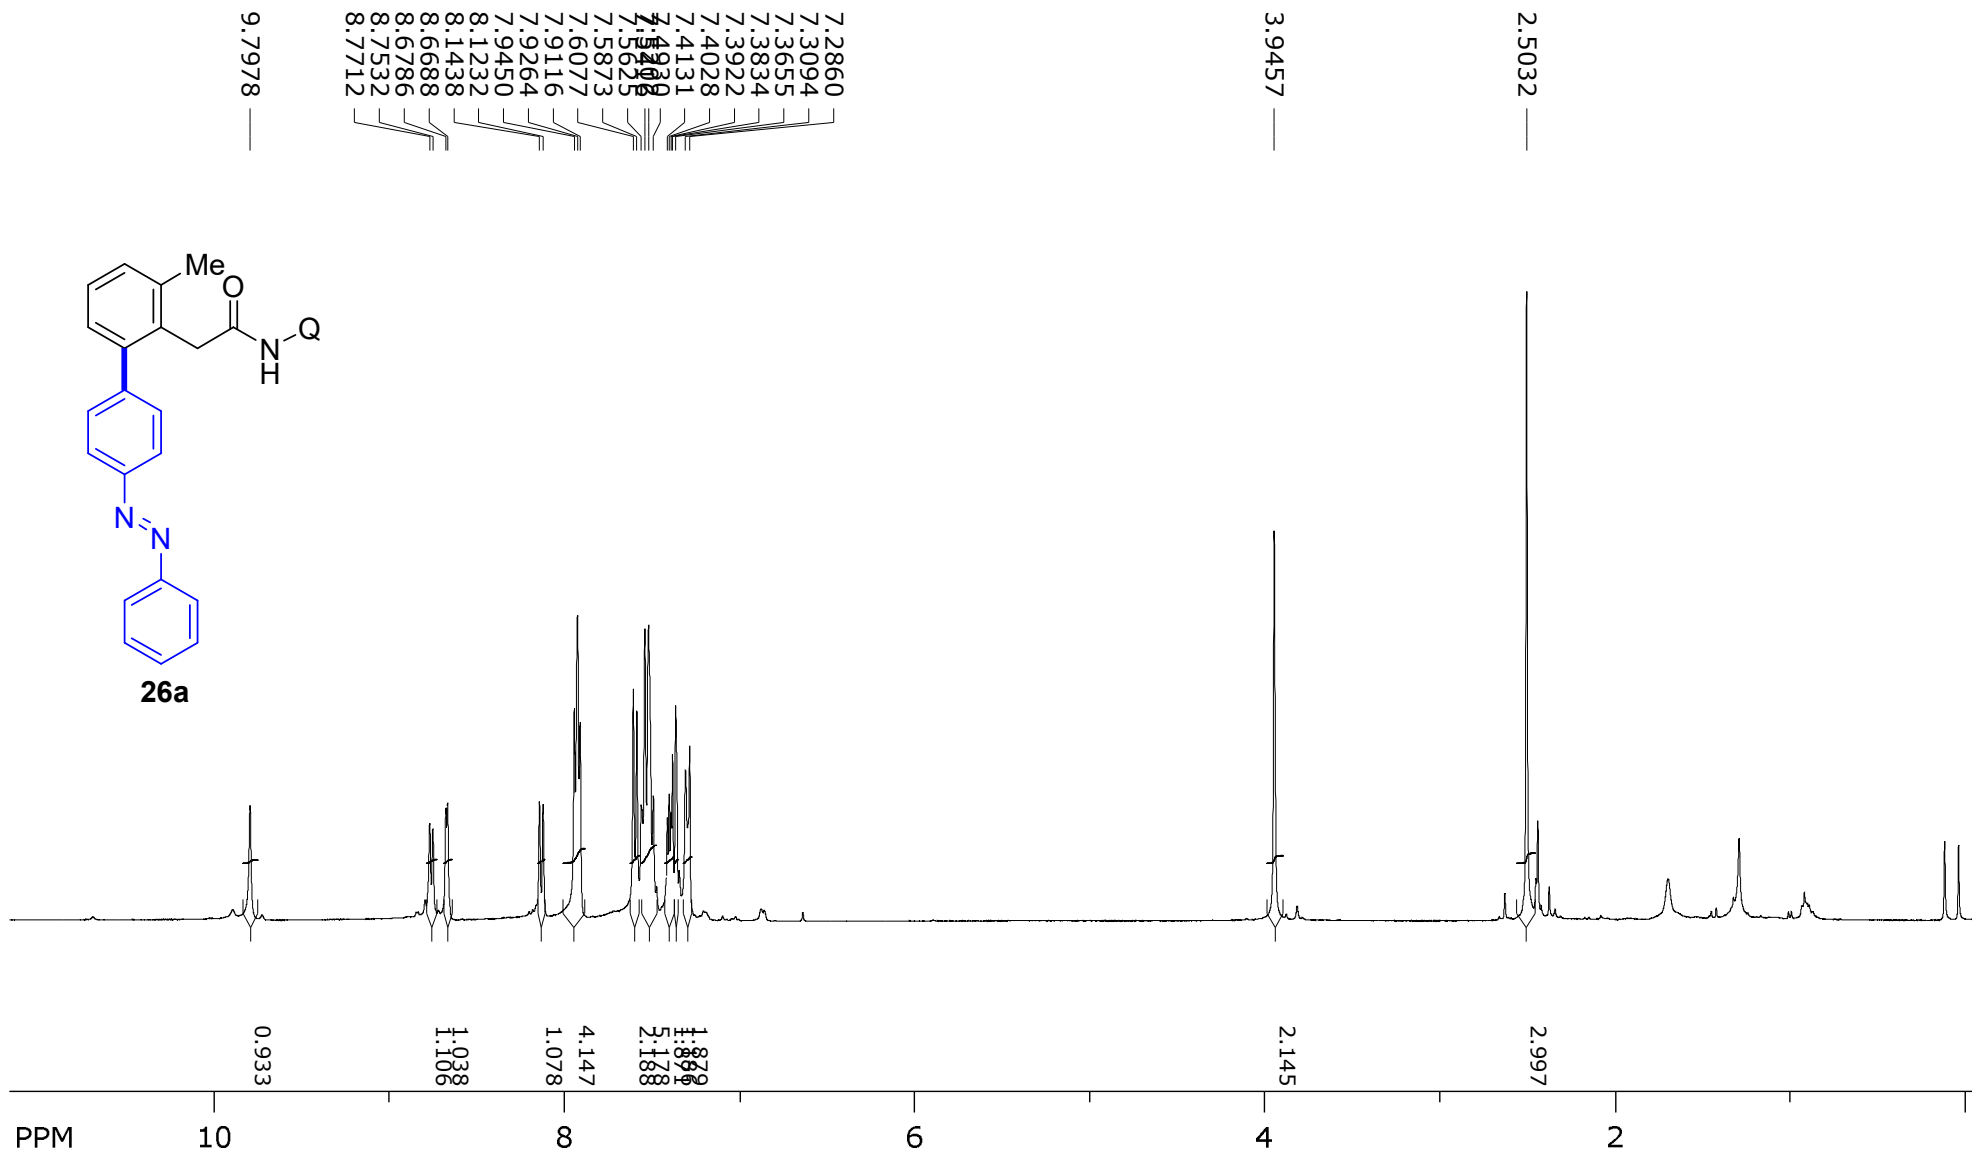

SpinWorks 4: ss-148-p  
PROTON CDCl3 /opt/topspin3.5pl2/nmrdata nmrsu 29

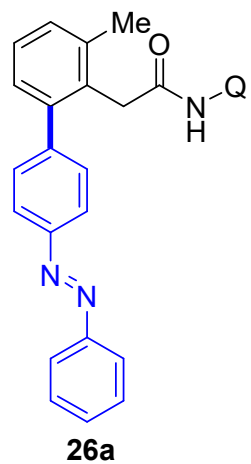

9.7978

8.6688  
8.6786  
8.7532  
8.7712

8.1232  
8.1438

7.9116  
7.9264  
7.9450

7.2860  
7.3094  
7.3655  
7.3834  
7.3922  
7.4028  
7.4131  
7.4930  
7.5202  
7.5416  
7.5625  
7.5873  
7.6077

0.933

1.106

1.038

1.078

4.147

2.188

5.178

1.871

1.186

1.879

PPM

10.0

9.6

9.2

8.8

8.4

8.0

7.6

7.2

SpinWorks 4: ss-148-p  
C13CPD256 CDCl3 /opt/topspin3.5pl2/nmrdata nmrsu 29

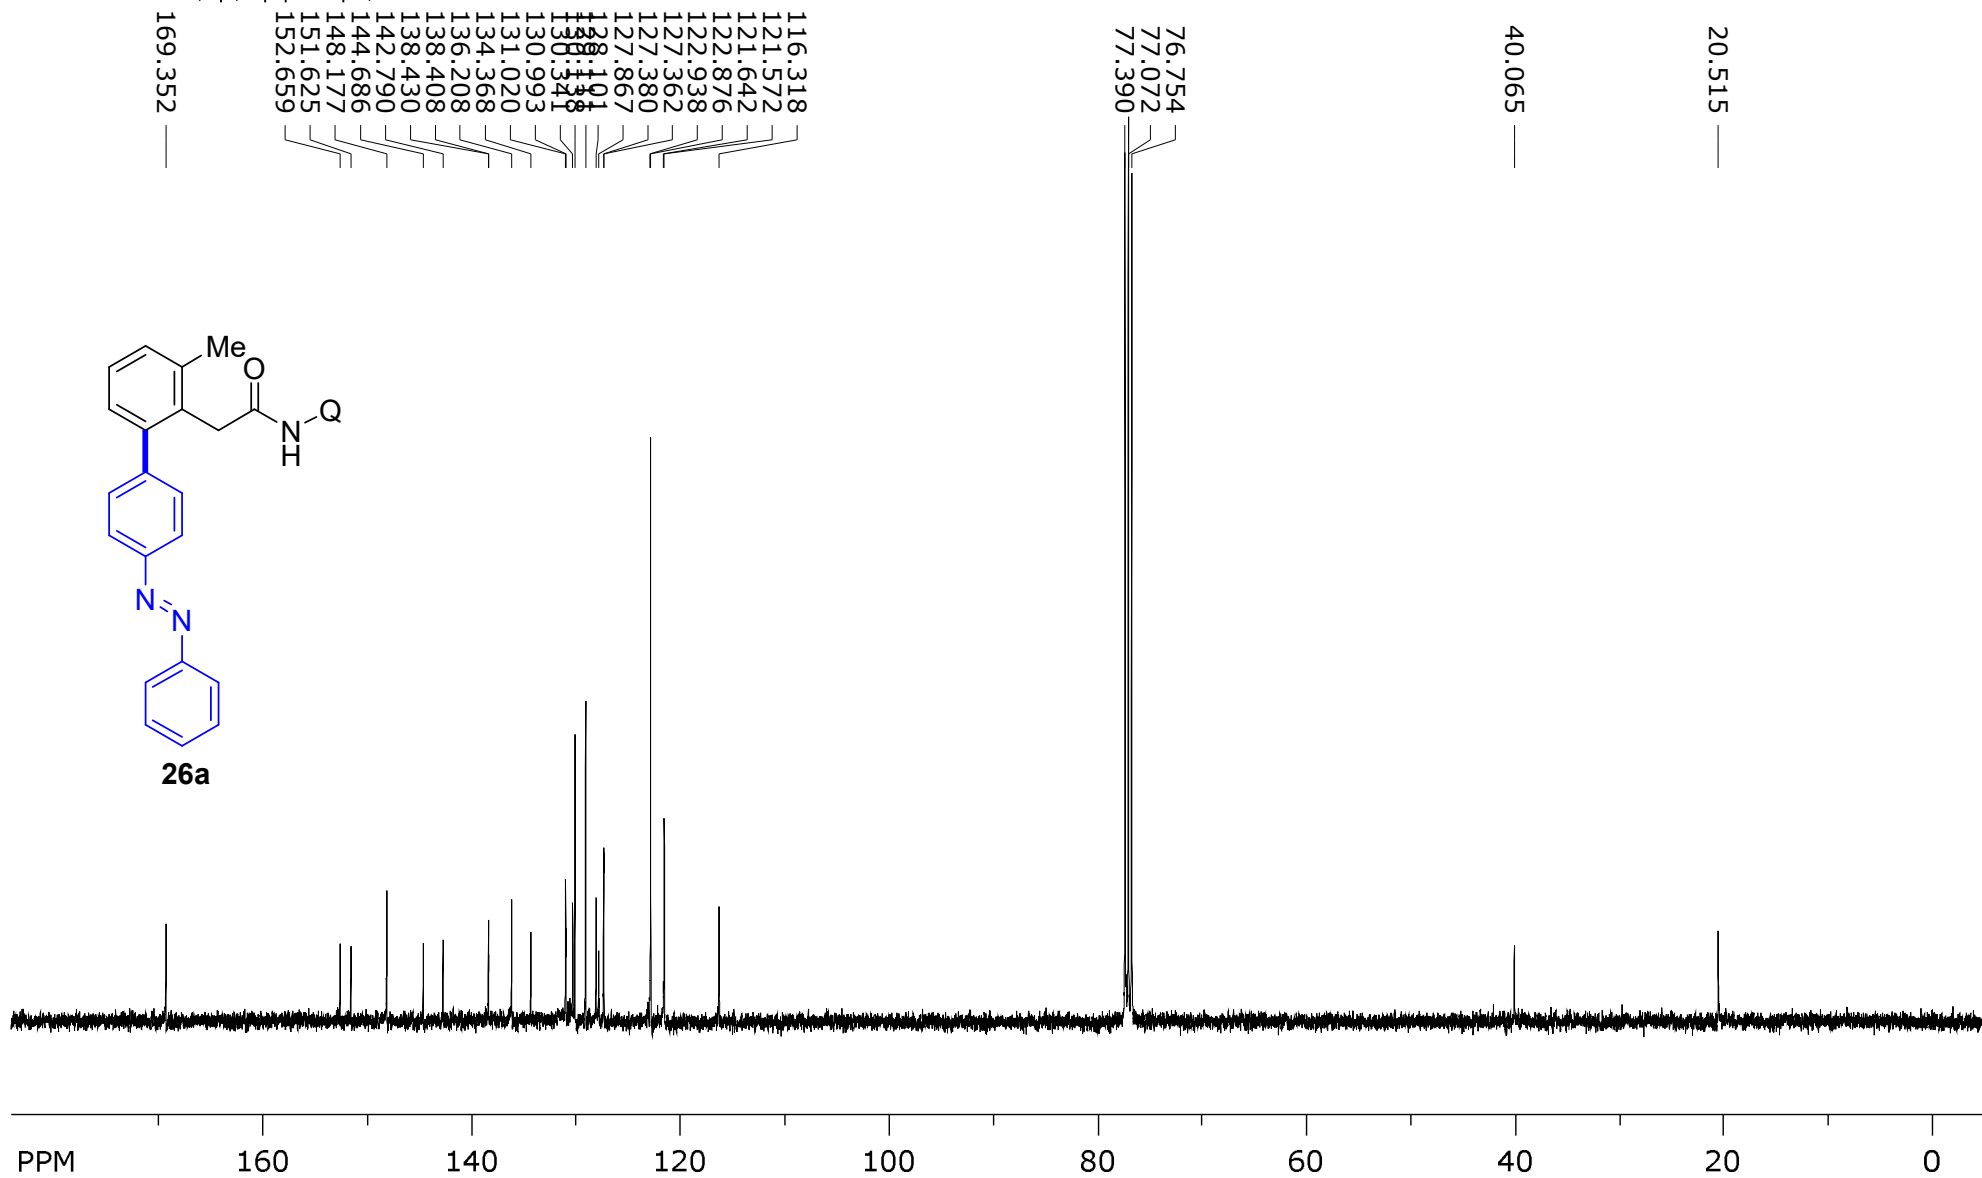

SpinWorks 4: ss-148-p  
C13CPD256 CDCl3 /opt/topspin3.5pl2/nmrdata nmrsu 29

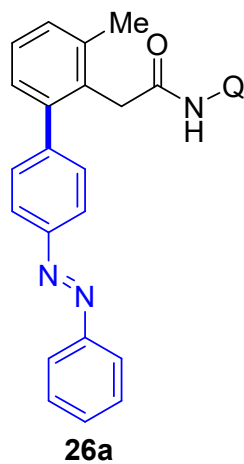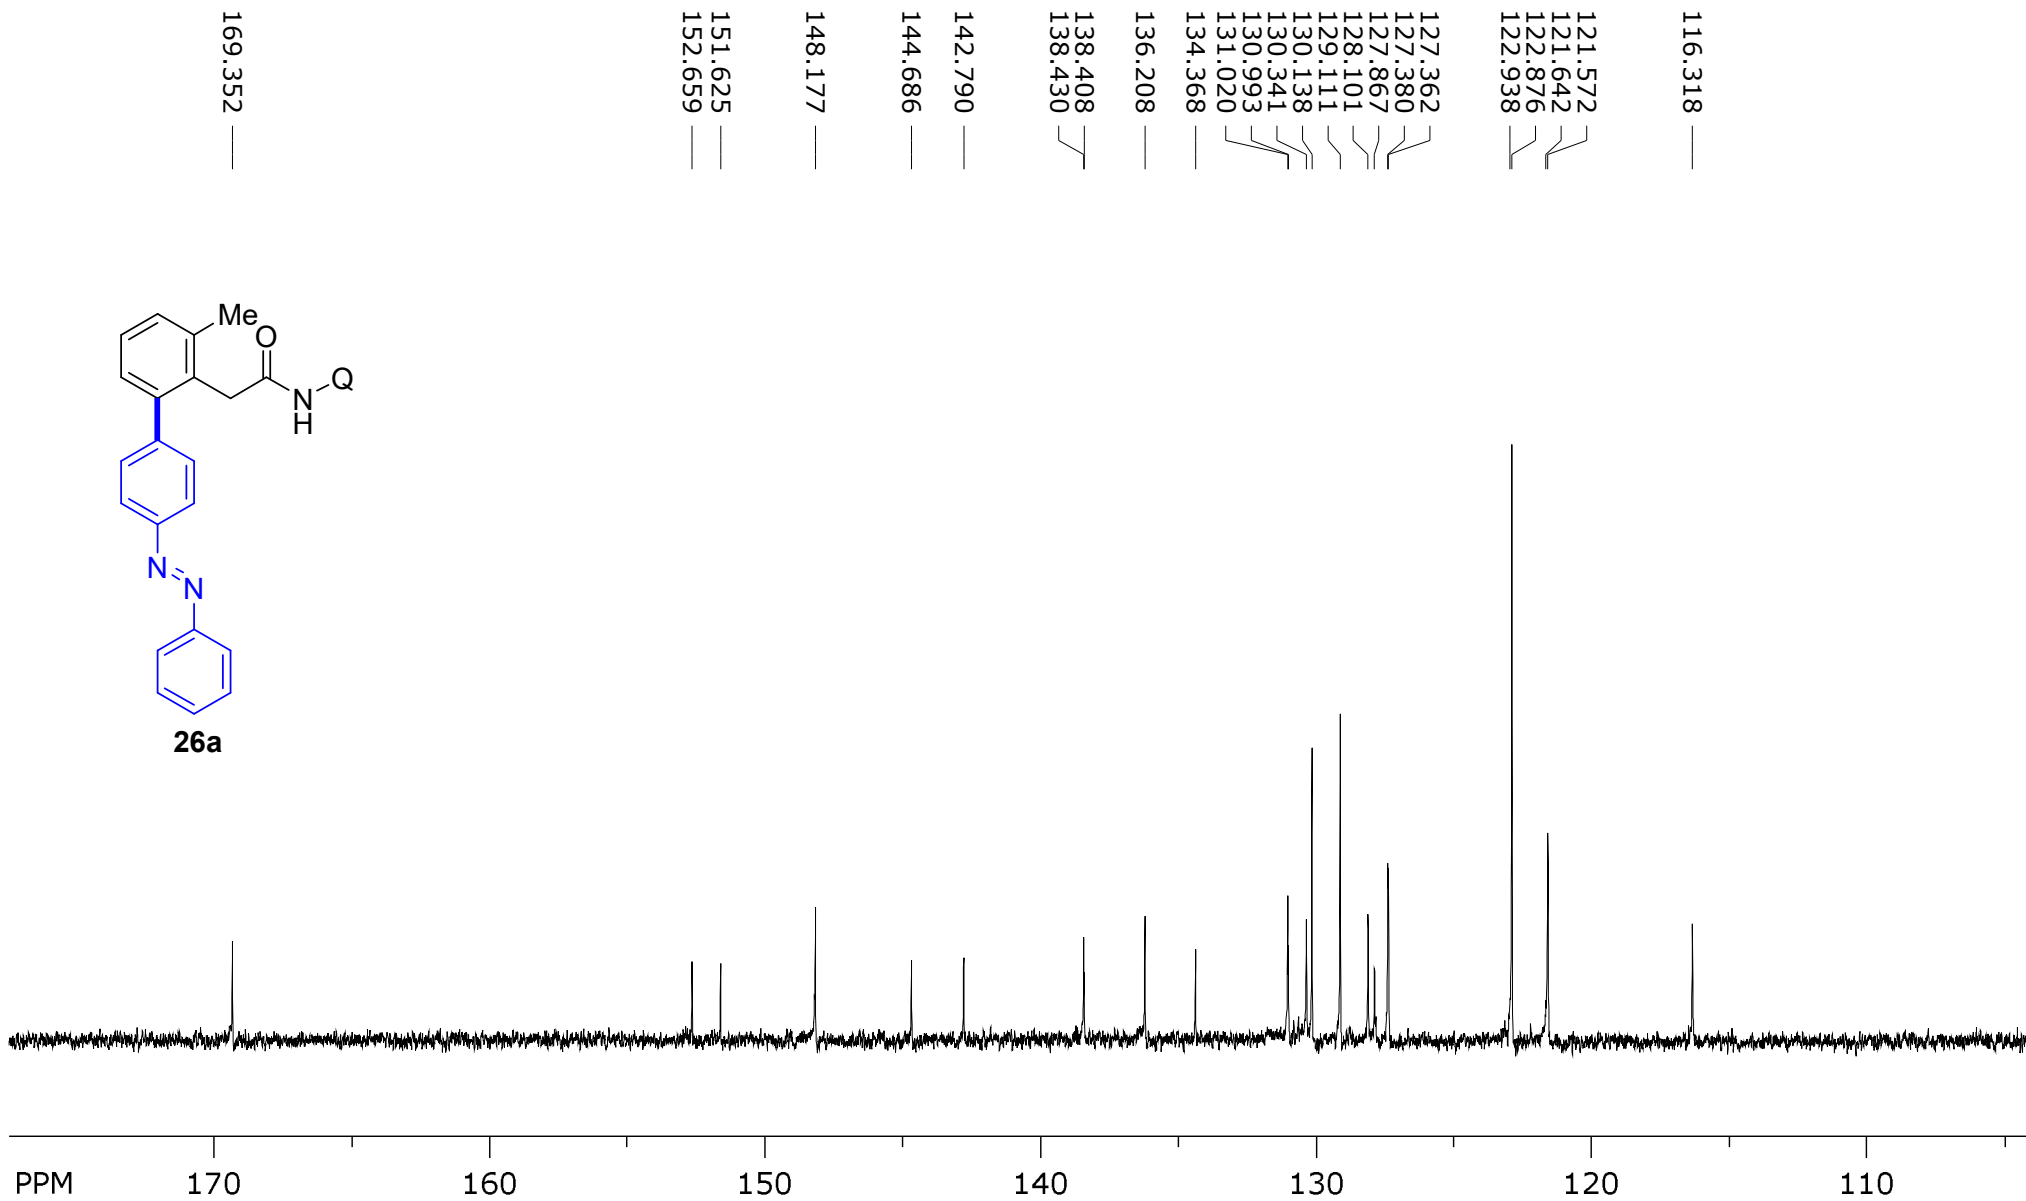

SS-163-p

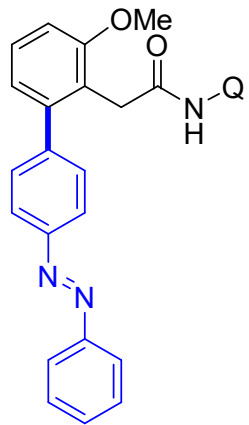

26b

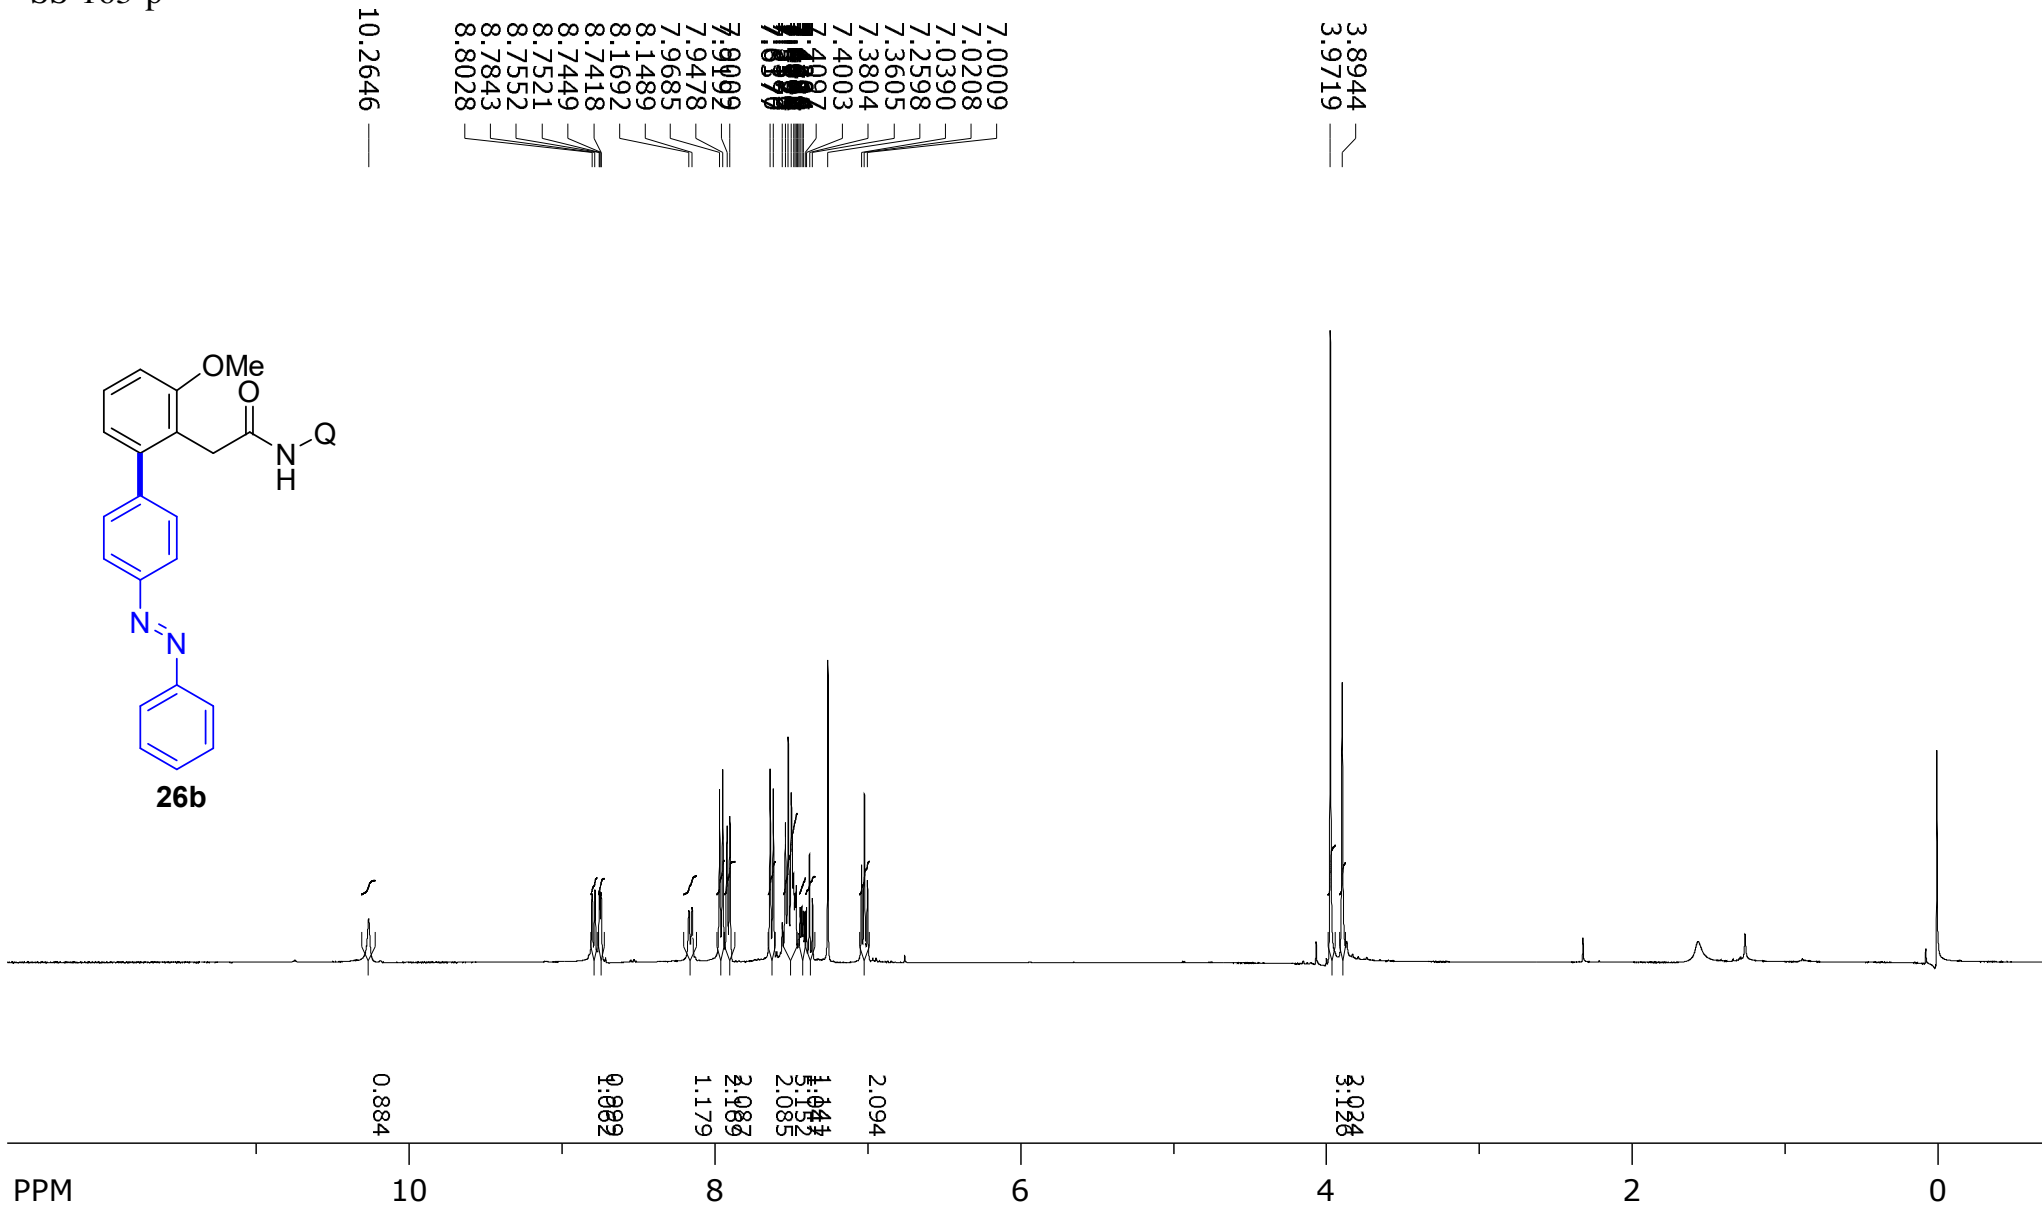

8.7418  
8.7449  
8.7521  
8.7552  
8.7843  
8.8028

8.1489  
8.1692

7.9009  
7.9192  
7.9478  
7.9685

7.2598  
7.3605  
7.3804  
7.4003  
7.4097  
7.4204  
7.4304  
7.4410  
7.4485  
7.4596  
7.4676  
7.4741  
7.4848  
7.4994  
7.5194  
7.5376  
7.5582  
7.6170  
7.6377

7.0009  
7.0208  
7.0390

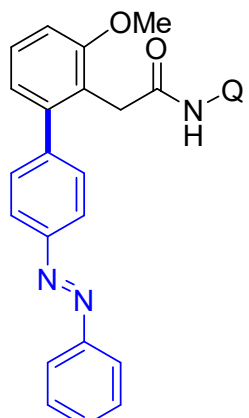

26b

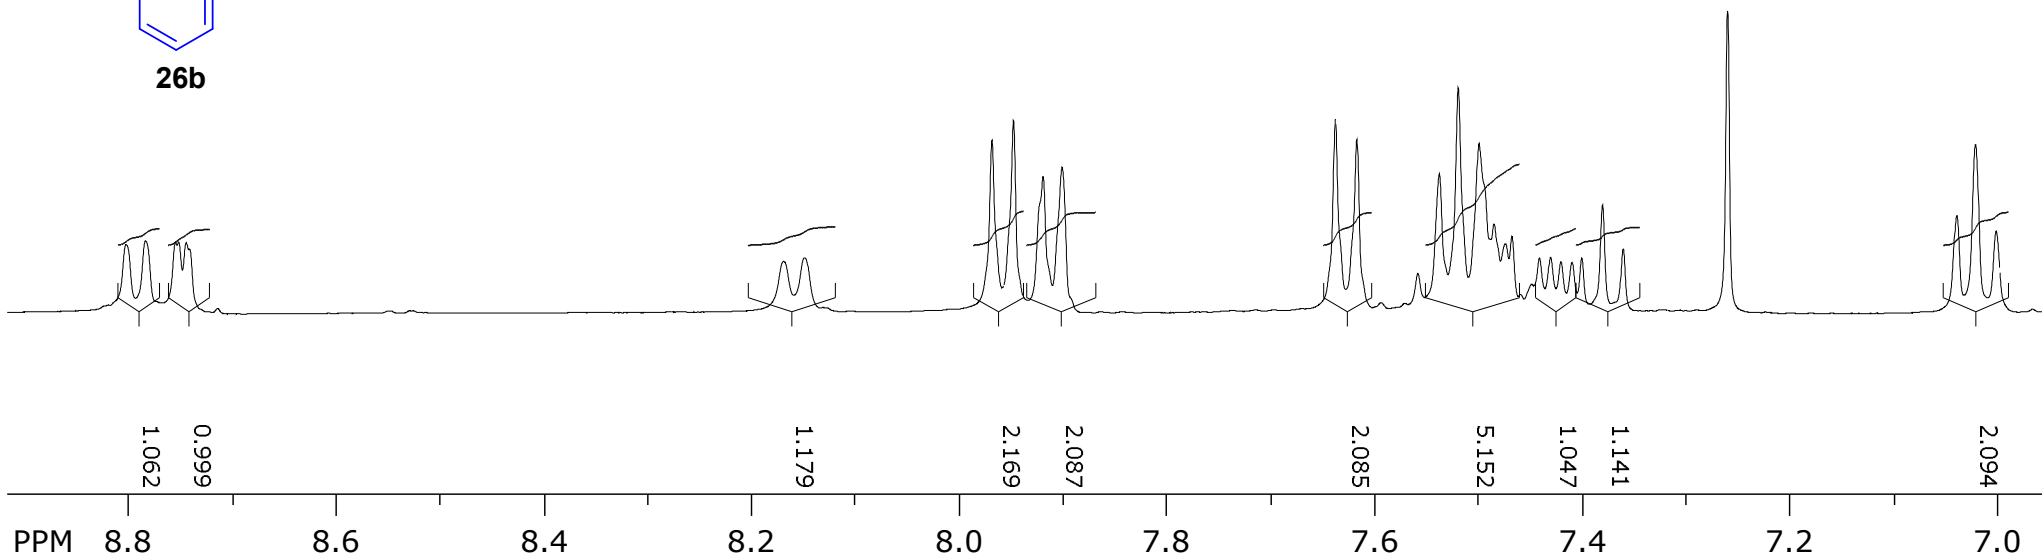

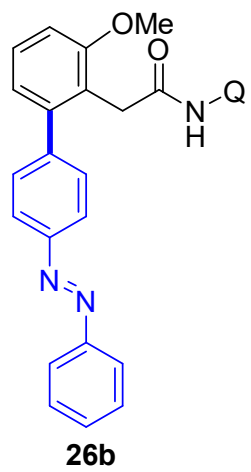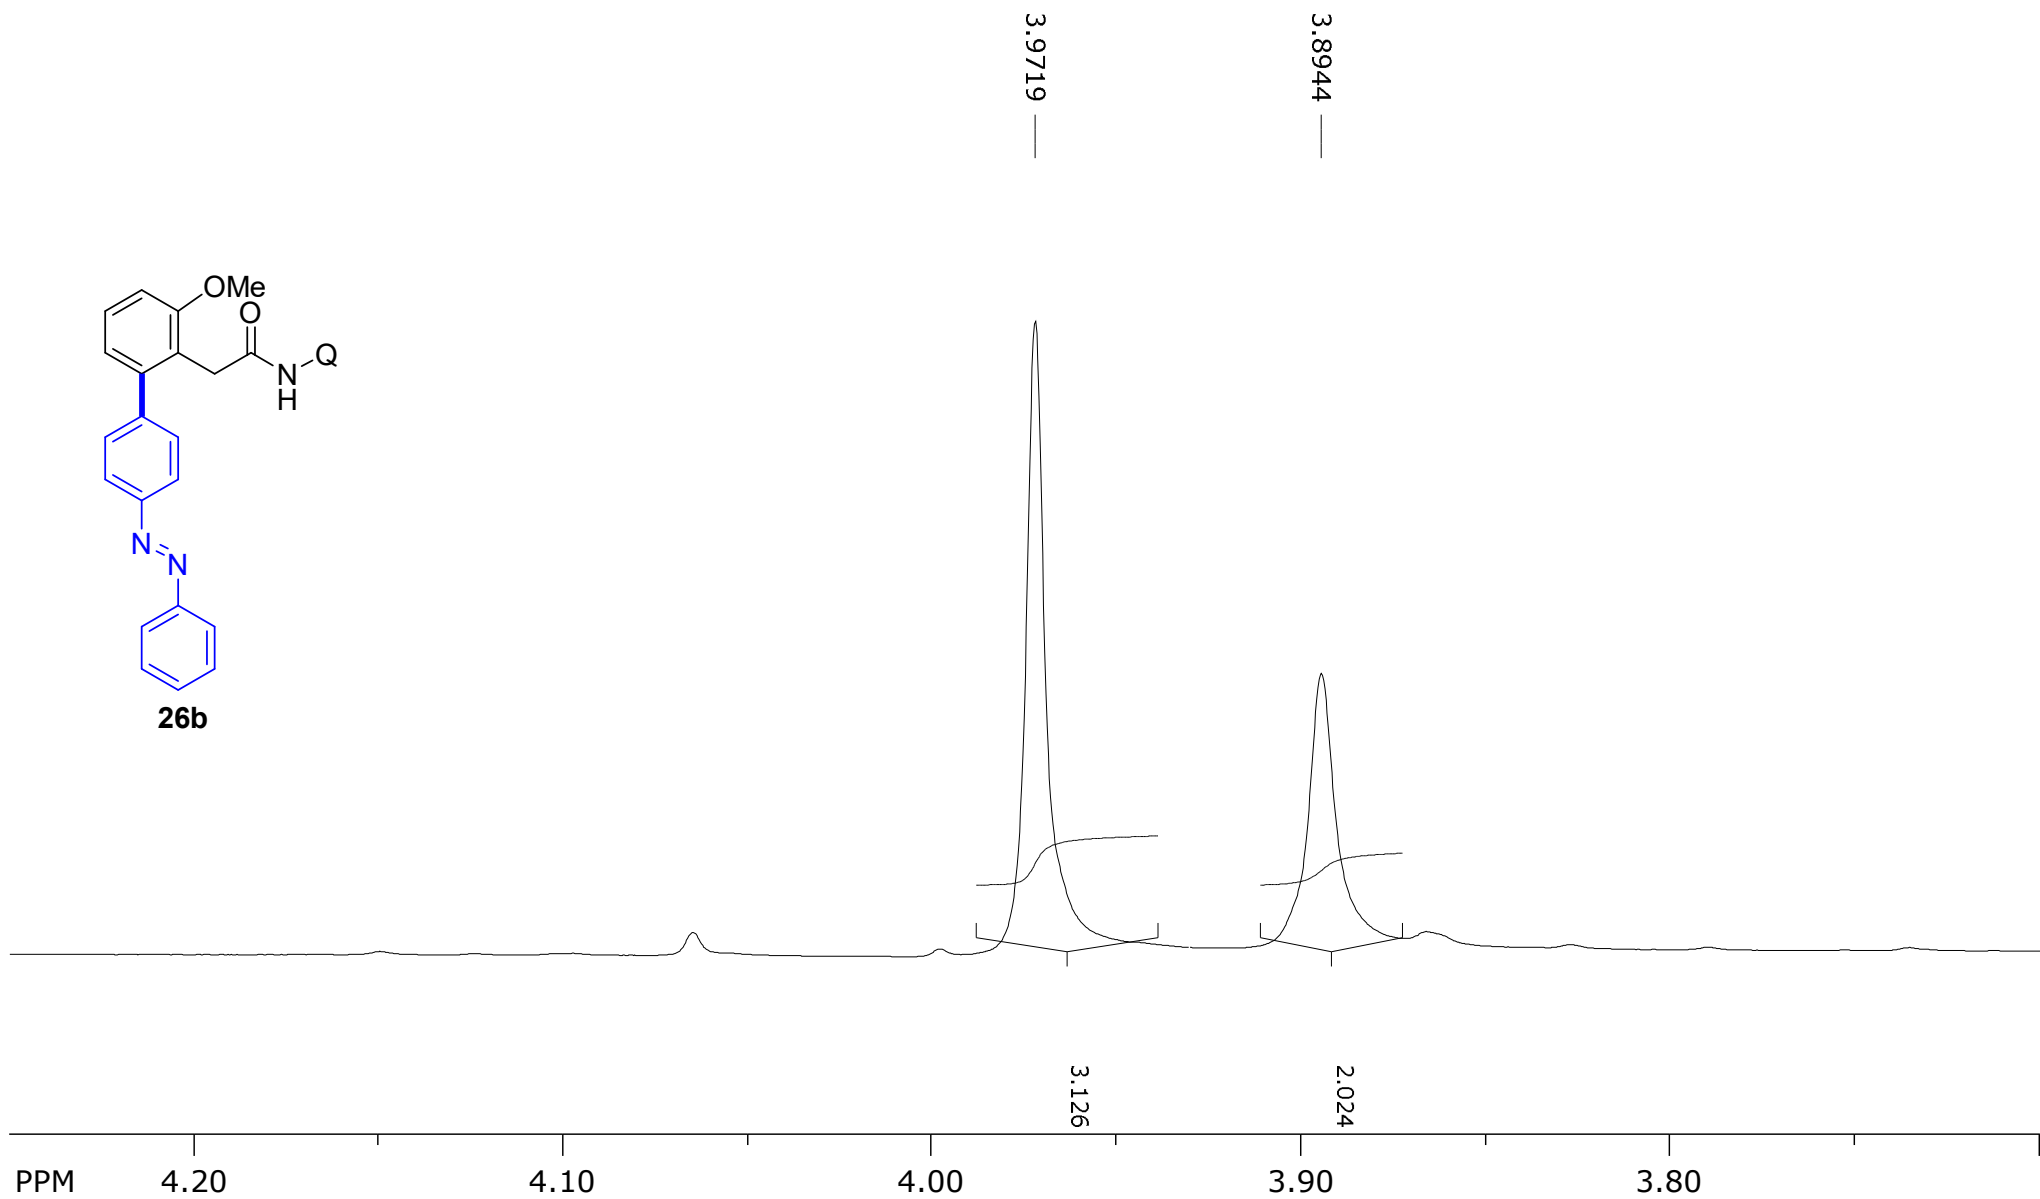

SpinWorks 4: SS 163 P  
C13CPD256 CDCl3 /opt/topspin3.5pl2/nmrdata nmrsu 28

170.033  
157.869  
152.733  
151.725  
148.020  
143.773  
143.655  
138.567  
136.253  
134.956  
131.002  
130.471  
129.126  
128.188  
127.951  
127.457  
122.912  
122.781  
122.664  
121.625  
121.494  
121.286  
116.480  
109.795

76.802  
77.121  
77.438

55.917

37.338

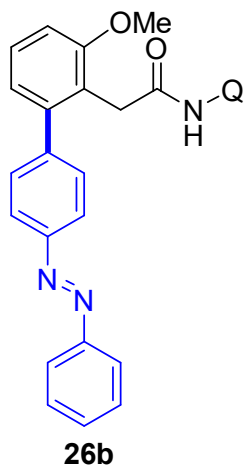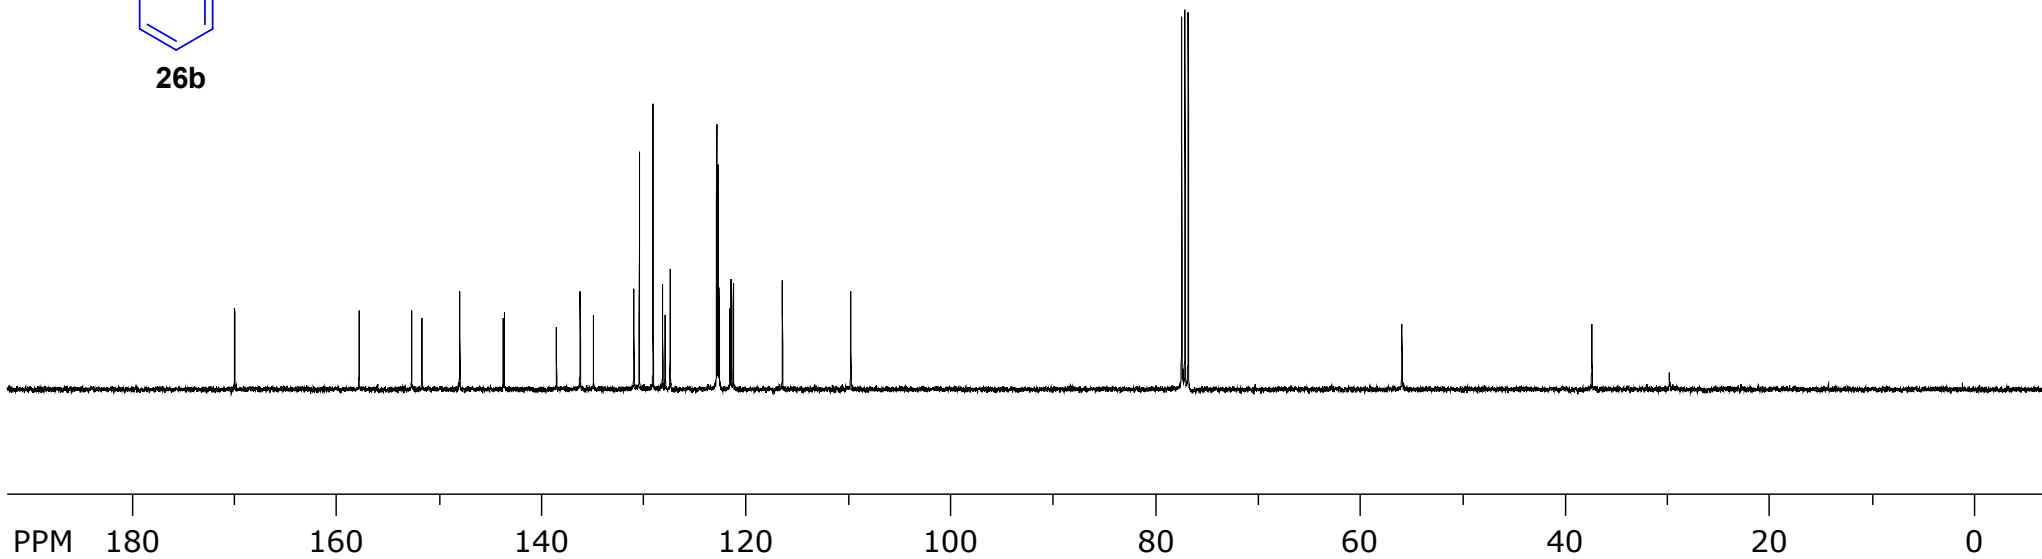



SpinWorks 4: SS-167-P  
PROTON CDCl3 /opt/topspin3.5pl2/nmrdata nmrsu 3

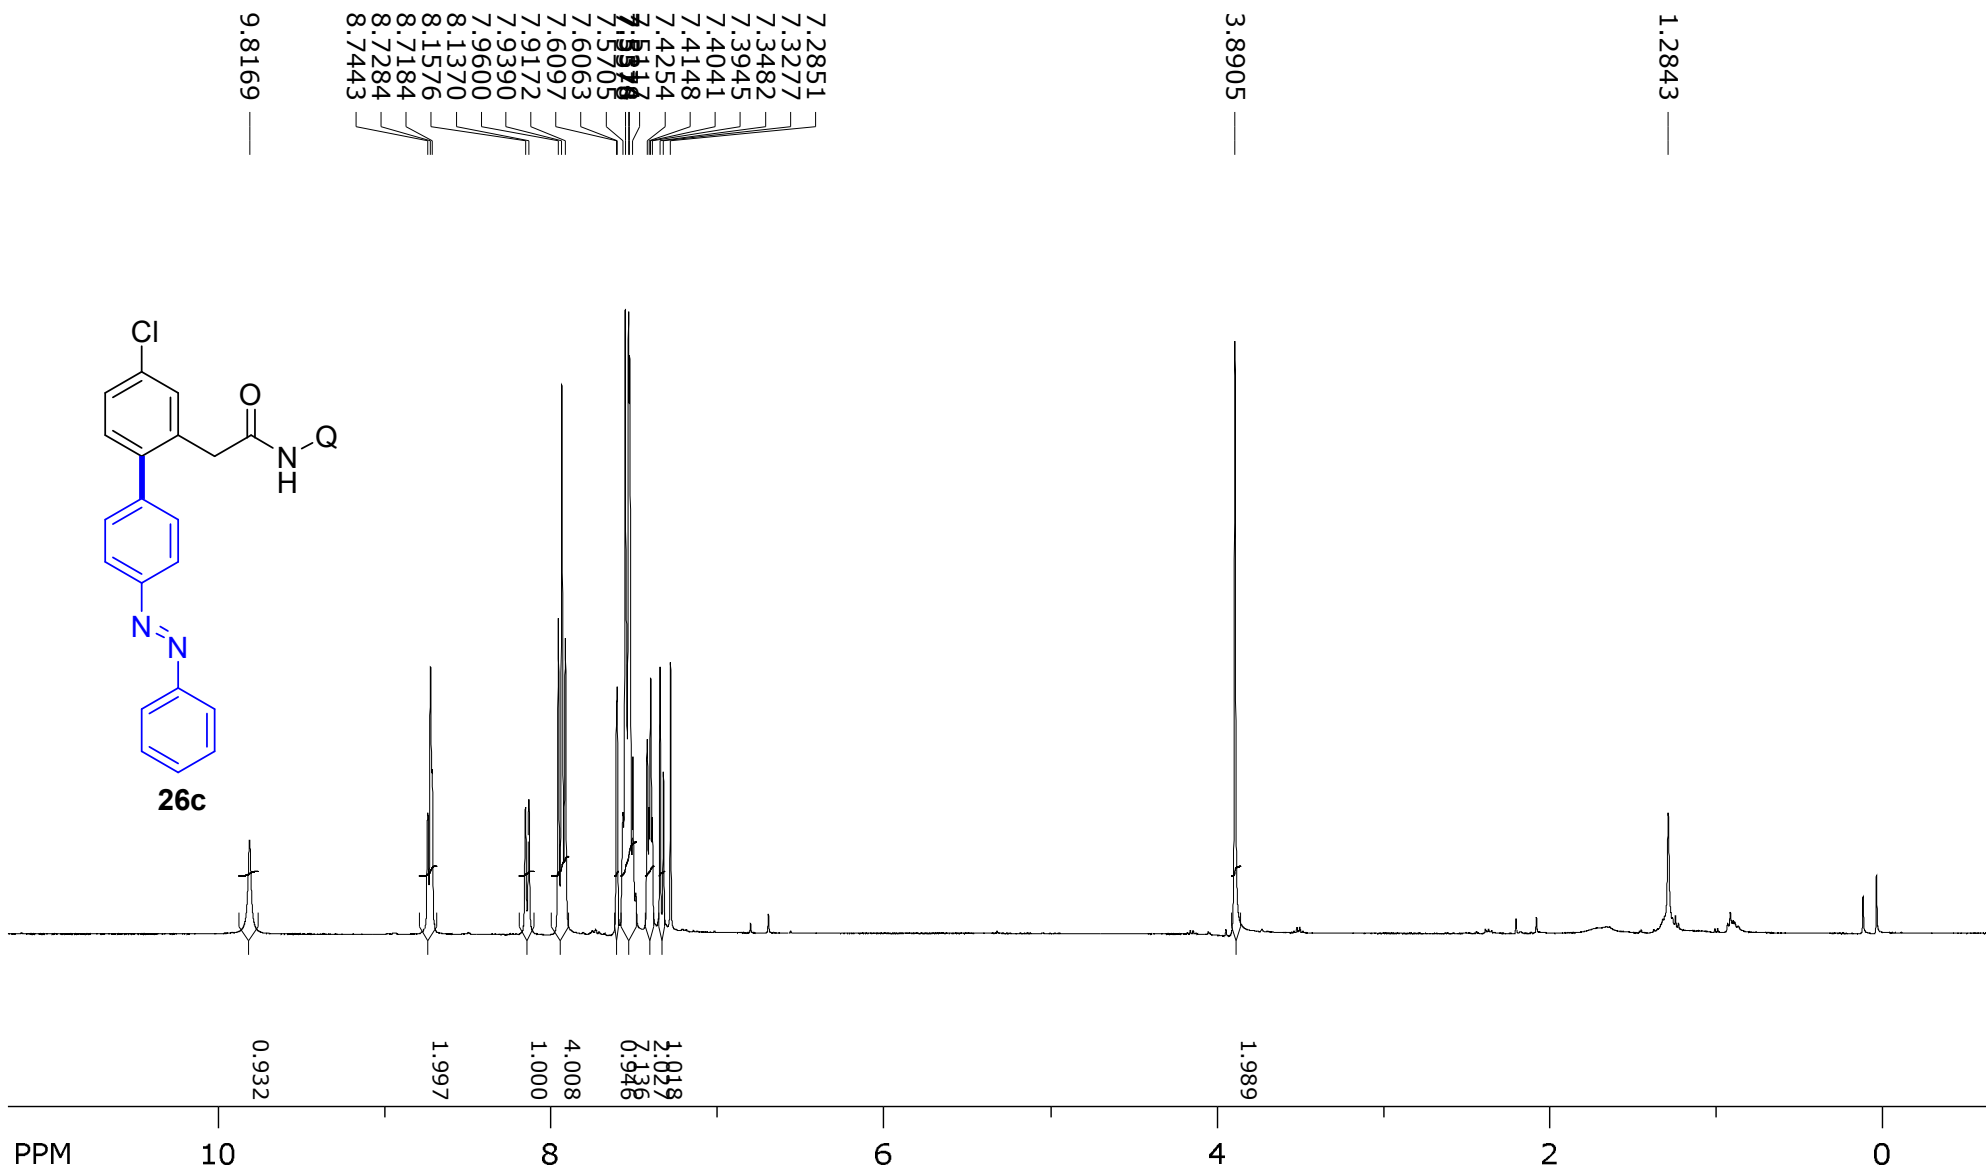

SpinWorks 4: SS-167-P  
PROTON CDCl3 /opt/topspin3.5pl2/nmrdata nmrsu 3

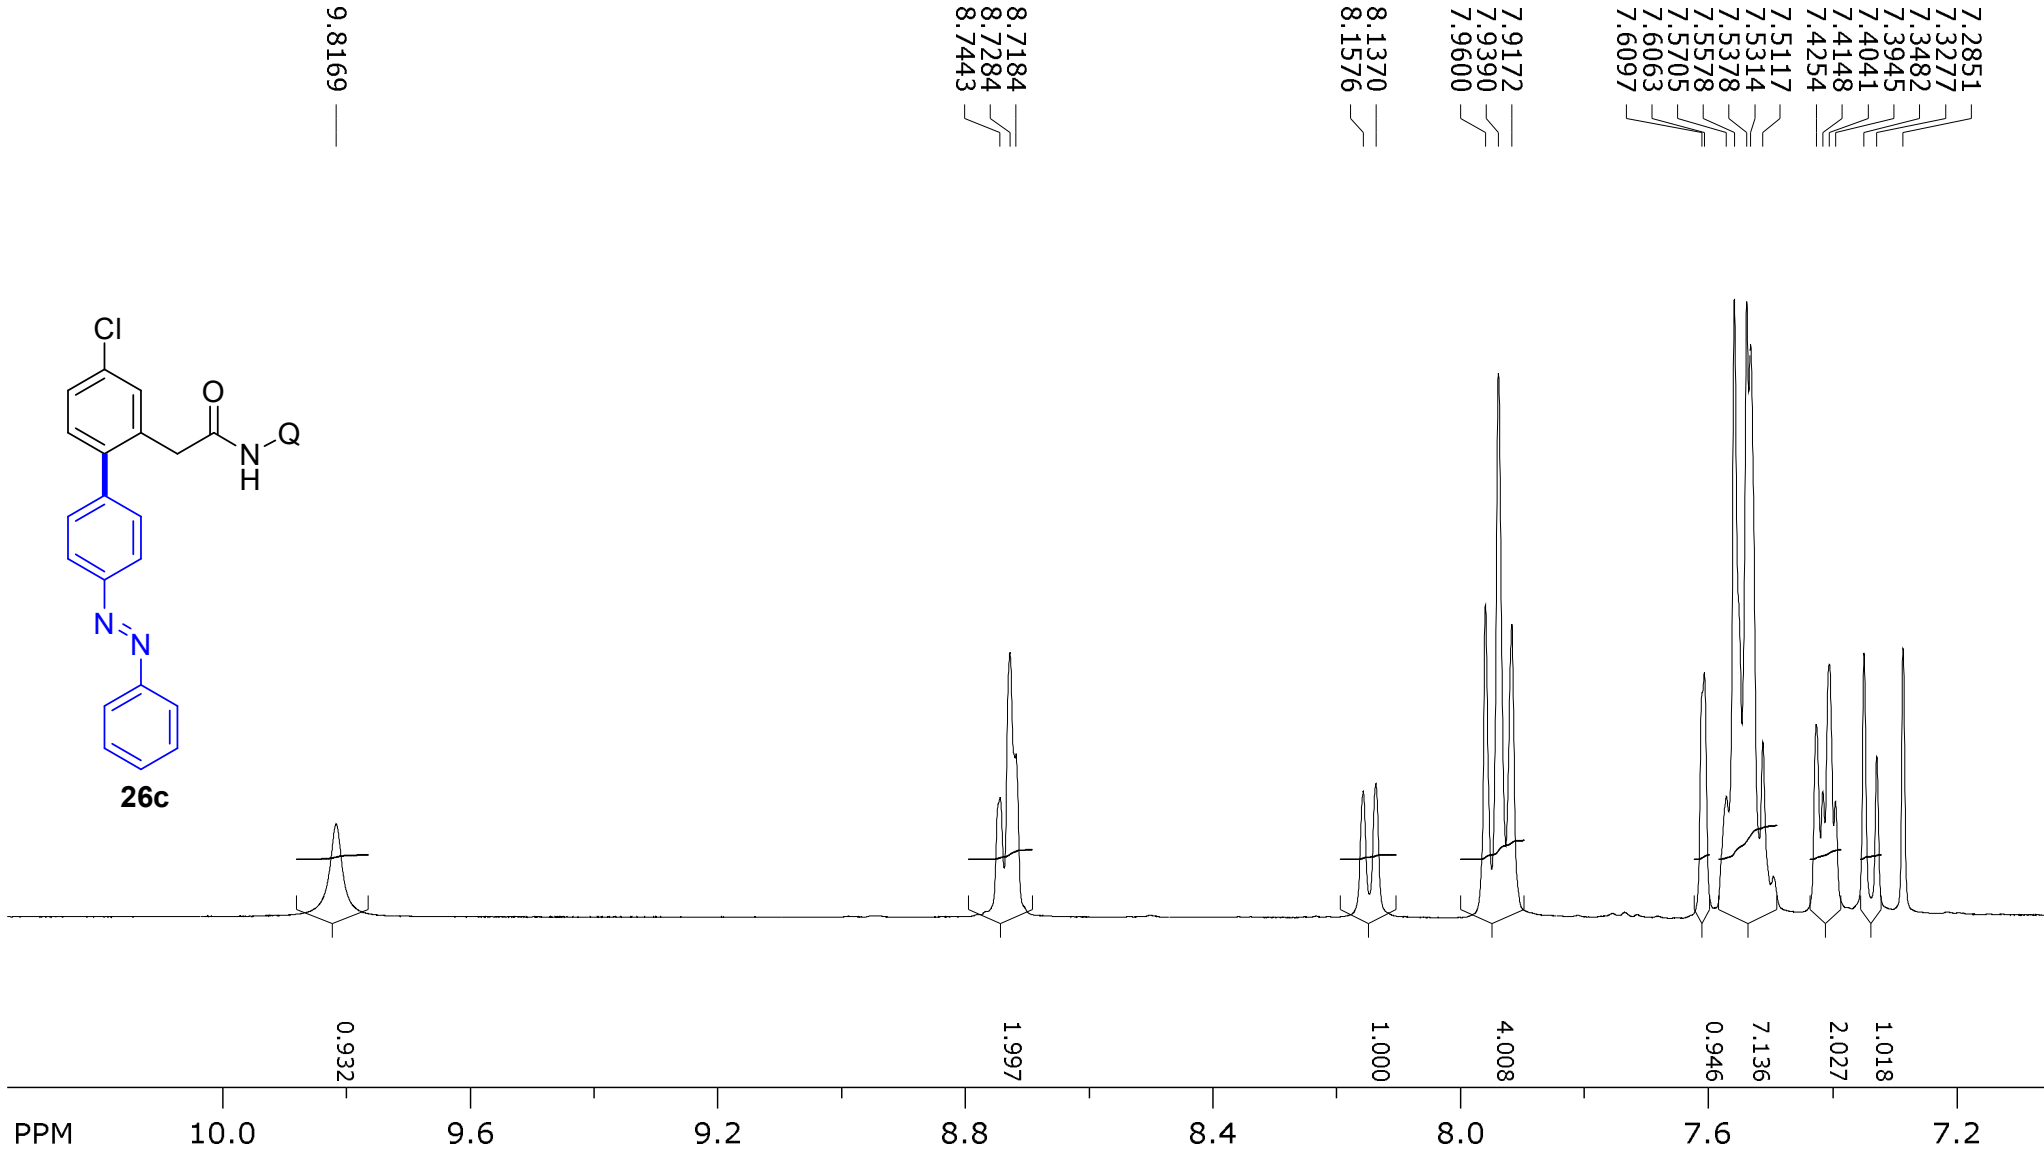

SpinWorks 4: SS-167-P  
C13CPD256 CDCl3 /opt/topspin3.5pl2/nmrdata nmrsu 3

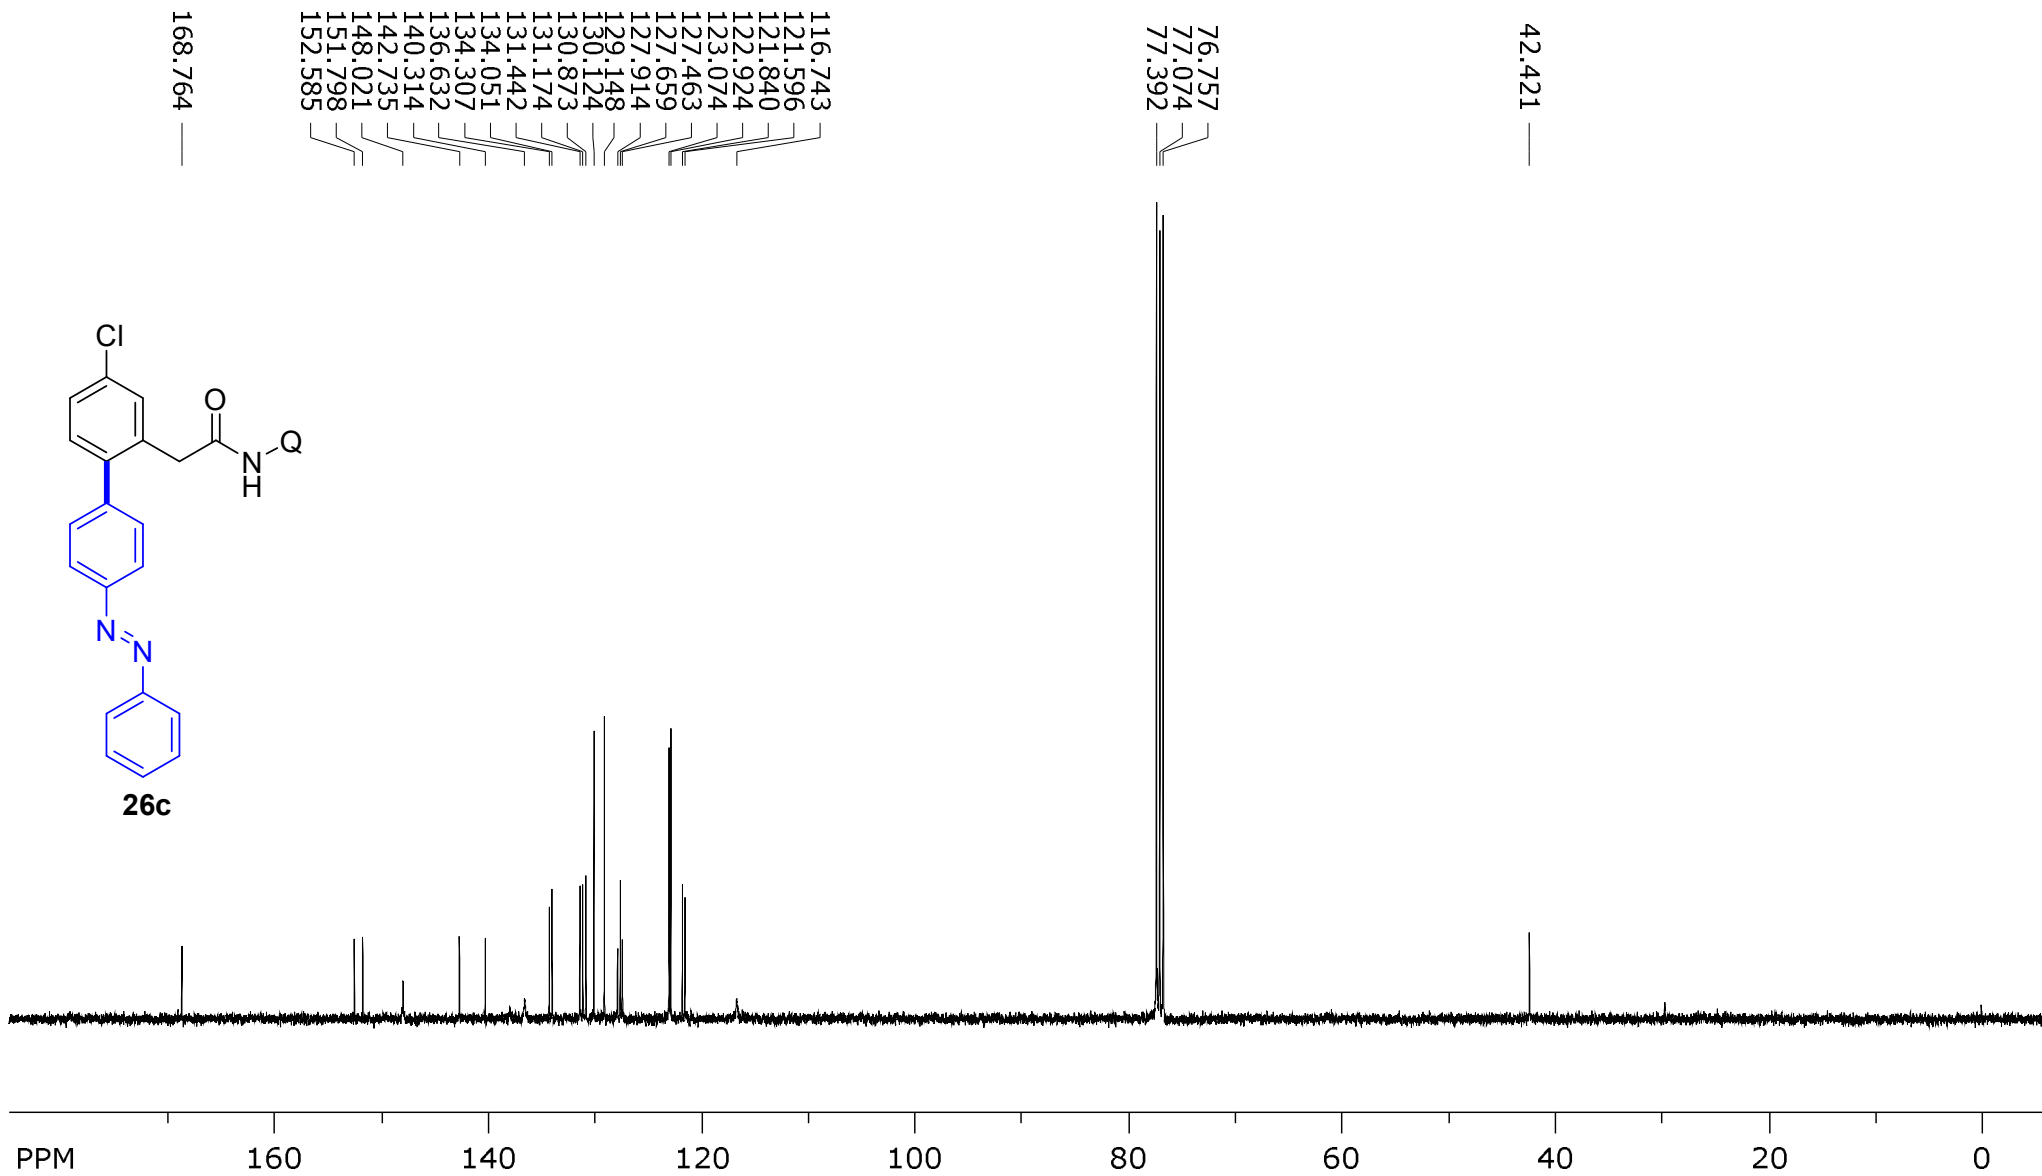

SpinWorks 4: SS 774  
PROTON CDCl3 /opt/topspin3.5pl2/nmrdata nmrsu 11

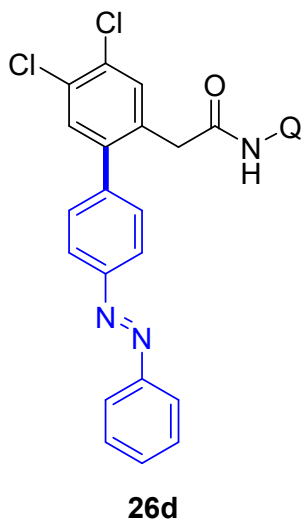

7.2837  
7.3923  
7.4029  
7.4130  
7.4236  
7.4978  
7.5048  
7.5097  
7.5100  
7.5103  
7.5106  
7.5109  
8.11508  
8.6930  
8.6998  
8.7087  
8.7152  
8.7191  
8.7256  
8.7298  
9.7478

3.8369

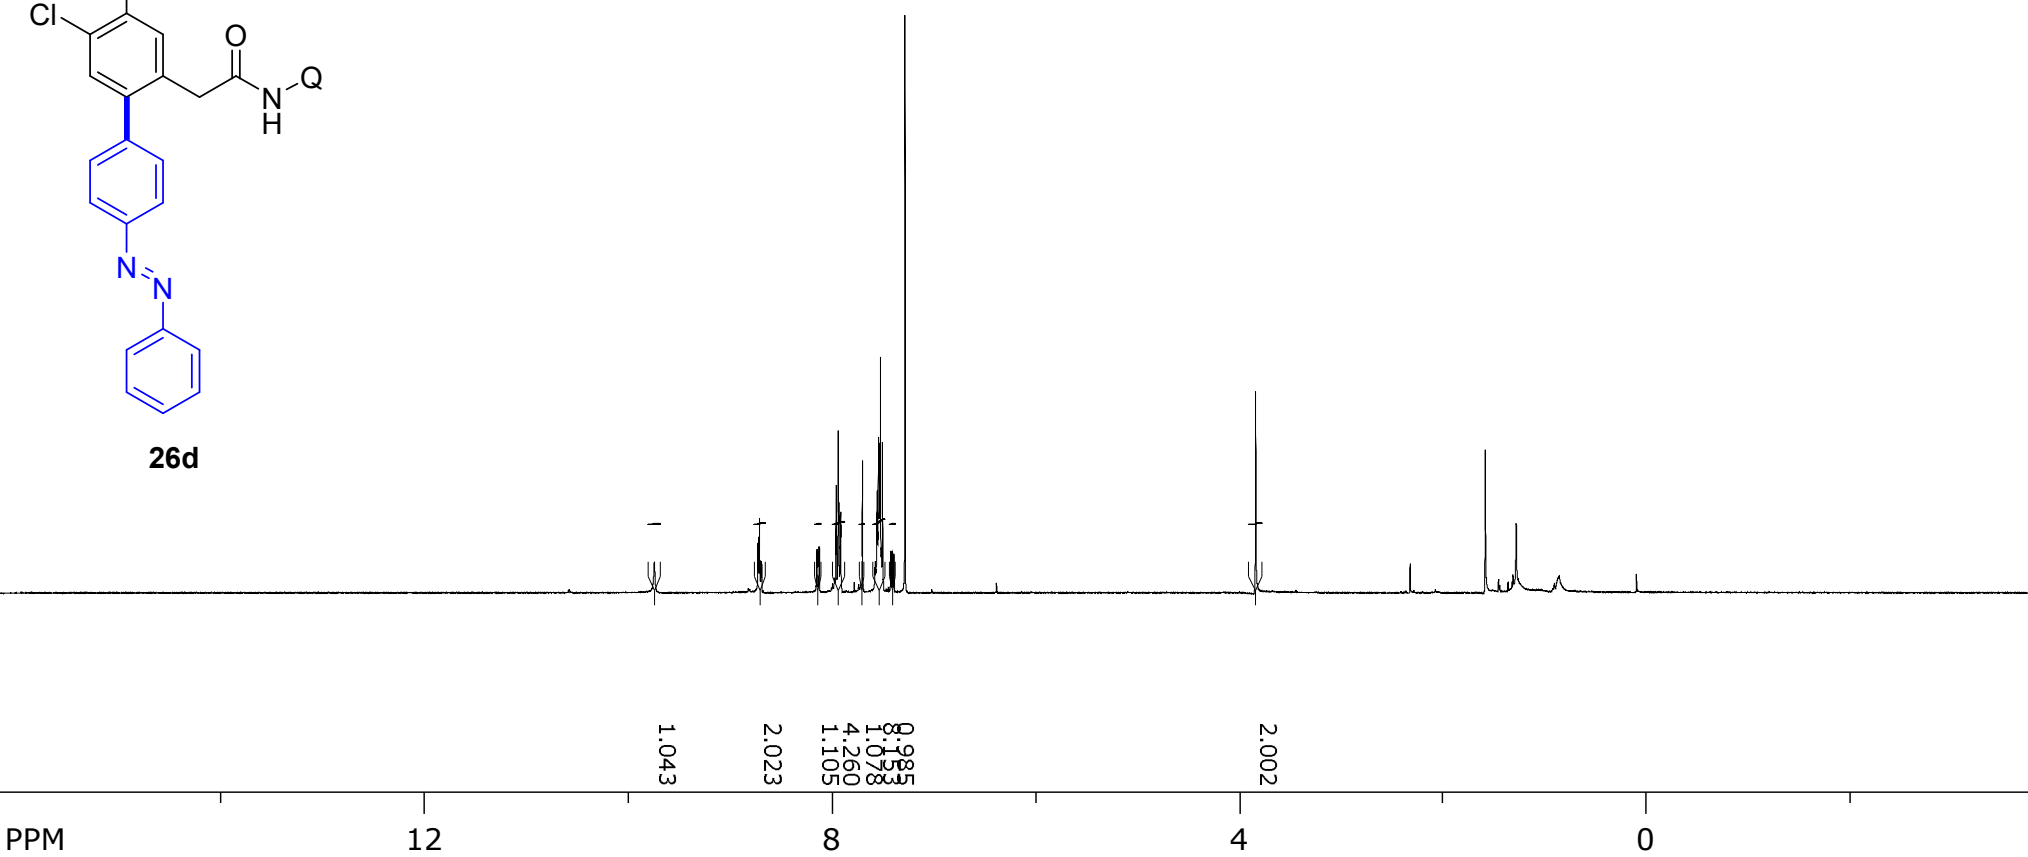

SpinWorks 4: SS 774  
PROTON CDCl3 /opt/topspin3.5pl2/nmrdata nmrsu 11

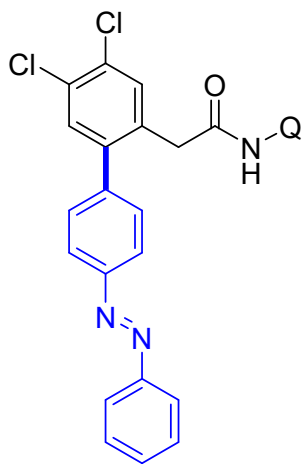

26d

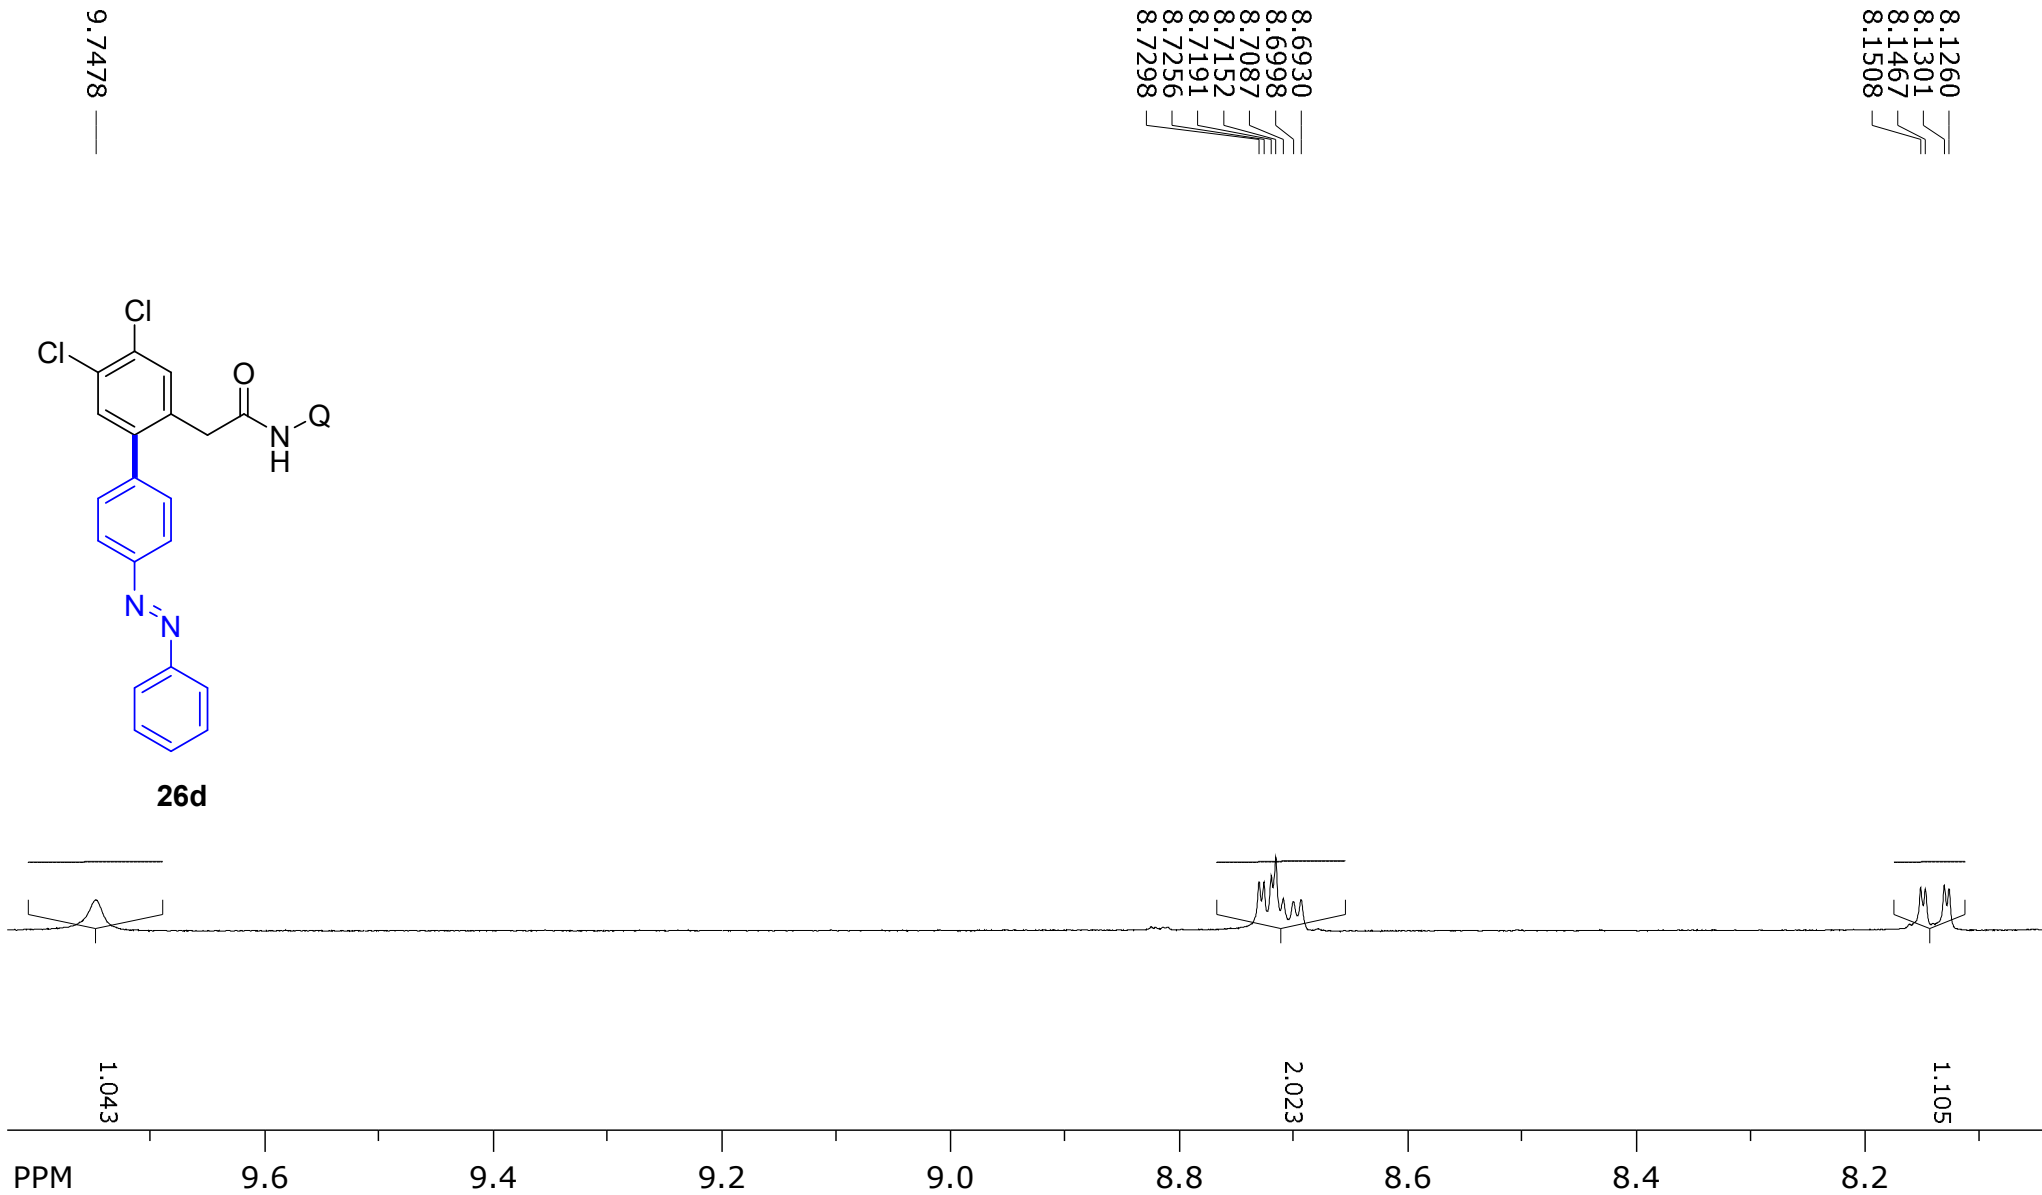

SpinWorks 4: SS 774  
PROTON CDCl3 /opt/topspin3.5pl2/nmrdata nmrsu 11

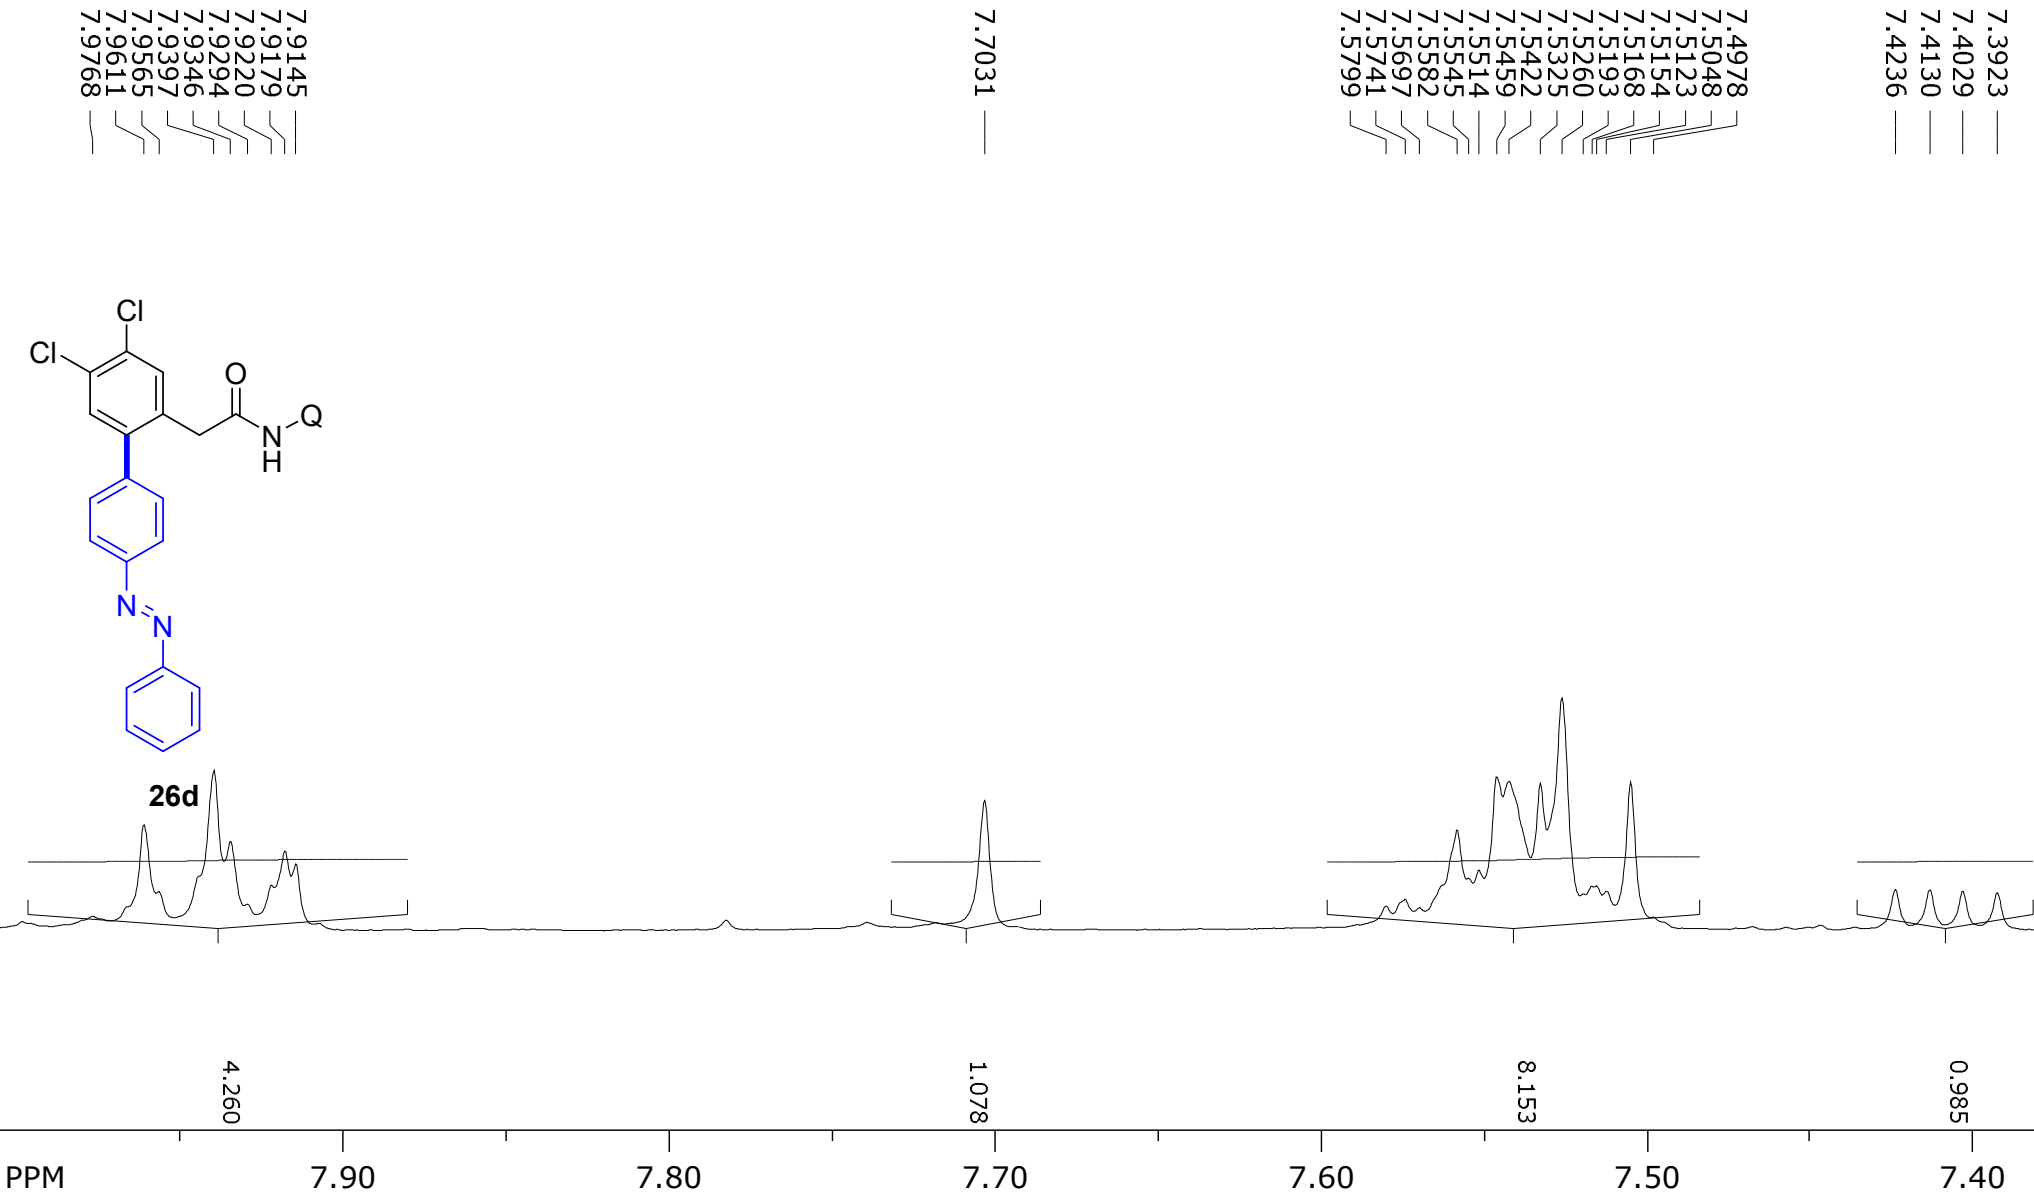

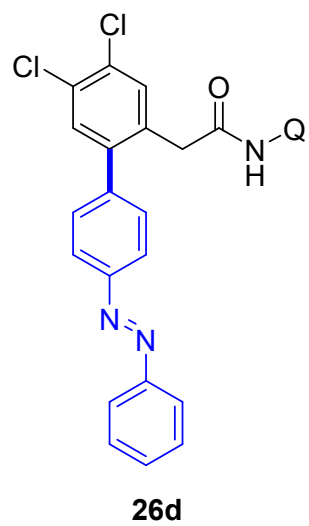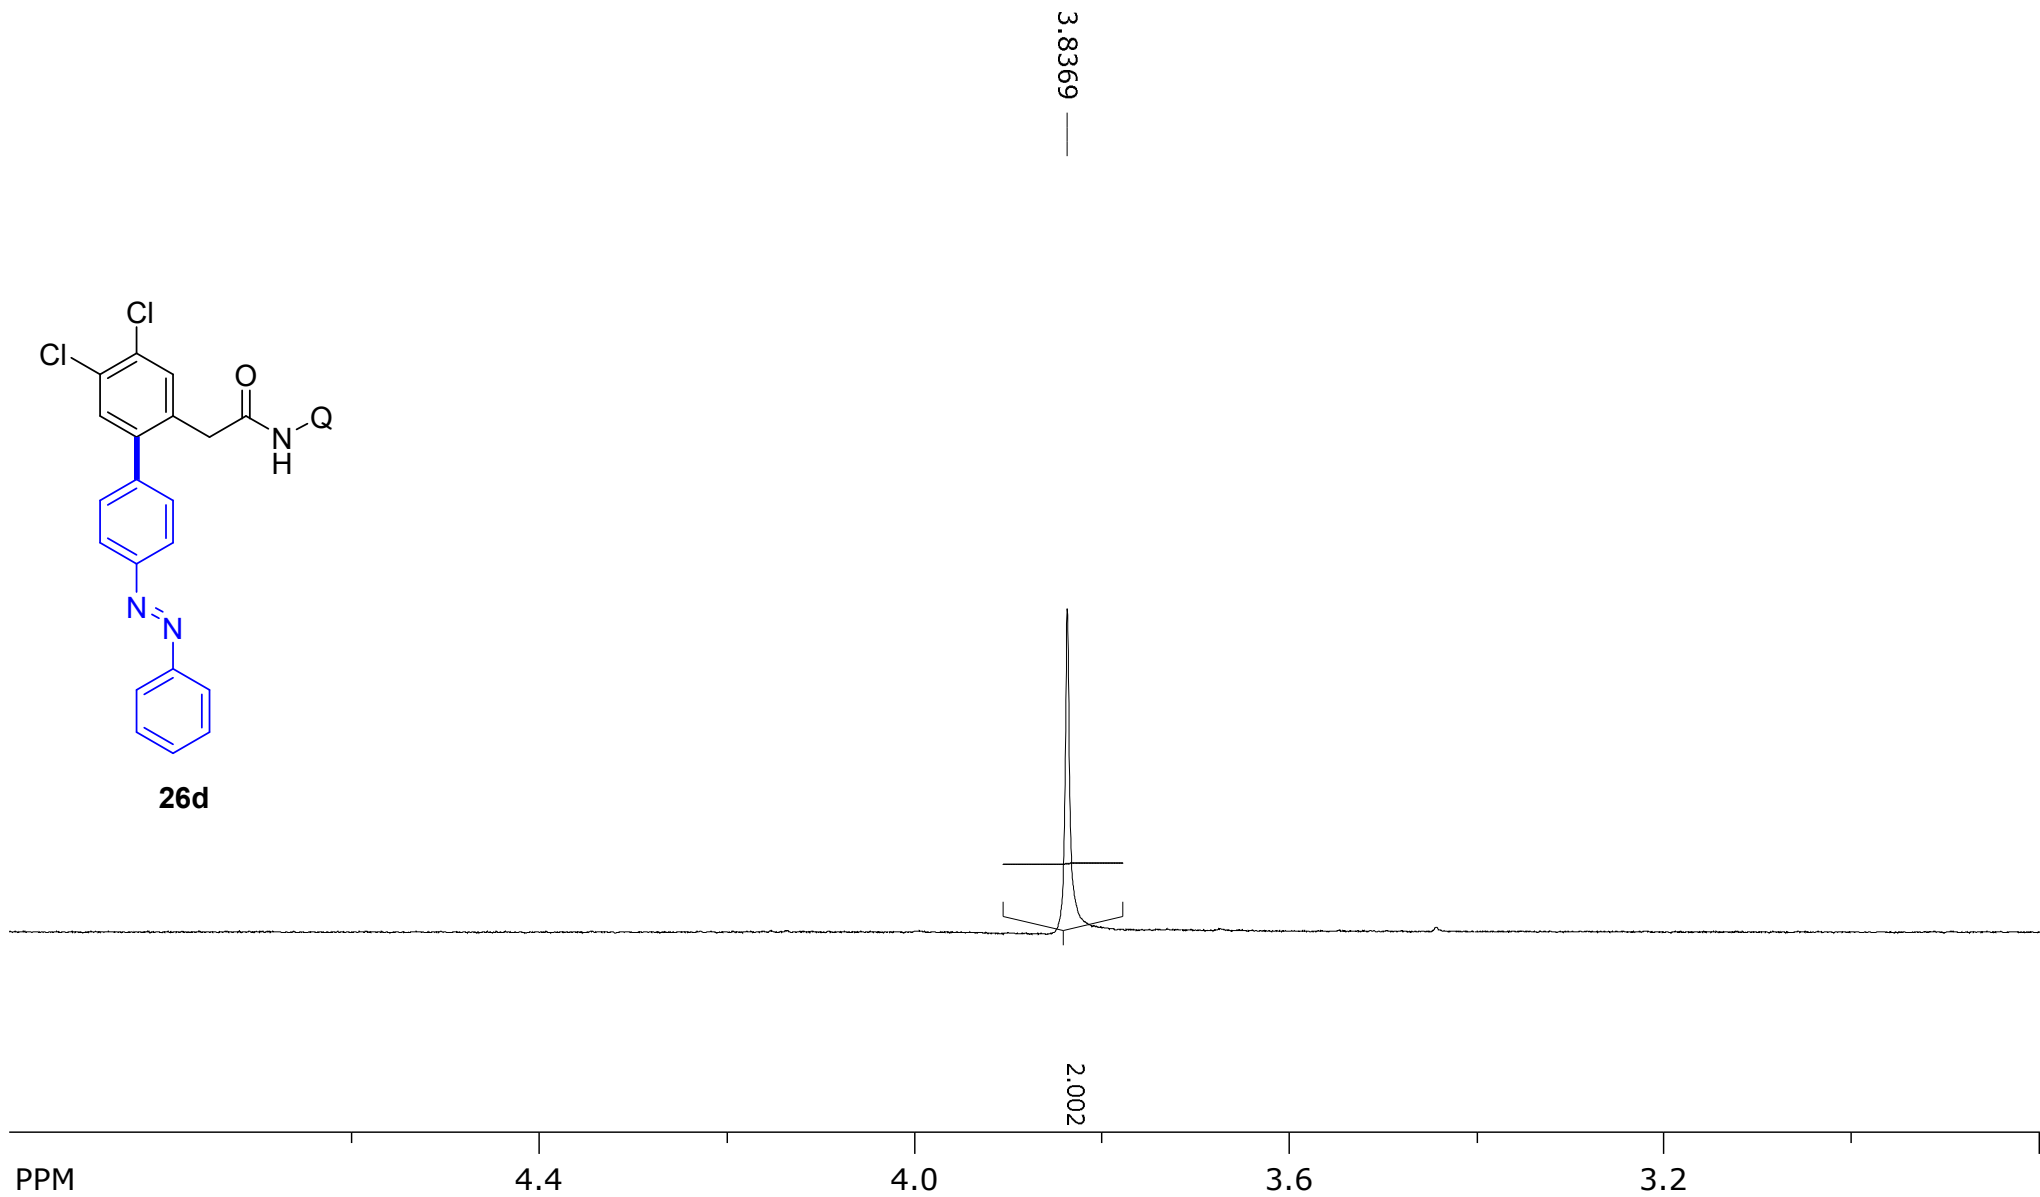

SpinWorks 4: SS 774  
C13CPD256 CDCl3 /opt/topspin3.5pl2/nmrdata nmrsu 16

116.427  
121.664  
121.881  
122.959  
123.173  
127.322  
127.858  
129.152  
129.969  
131.978  
132.660  
132.681  
134.065  
136.298  
138.252  
141.429  
141.680  
148.269  
152.027  
152.553  
168.263

76.742  
77.059  
77.377

41.803

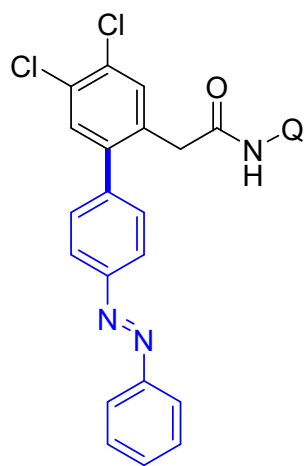

26d

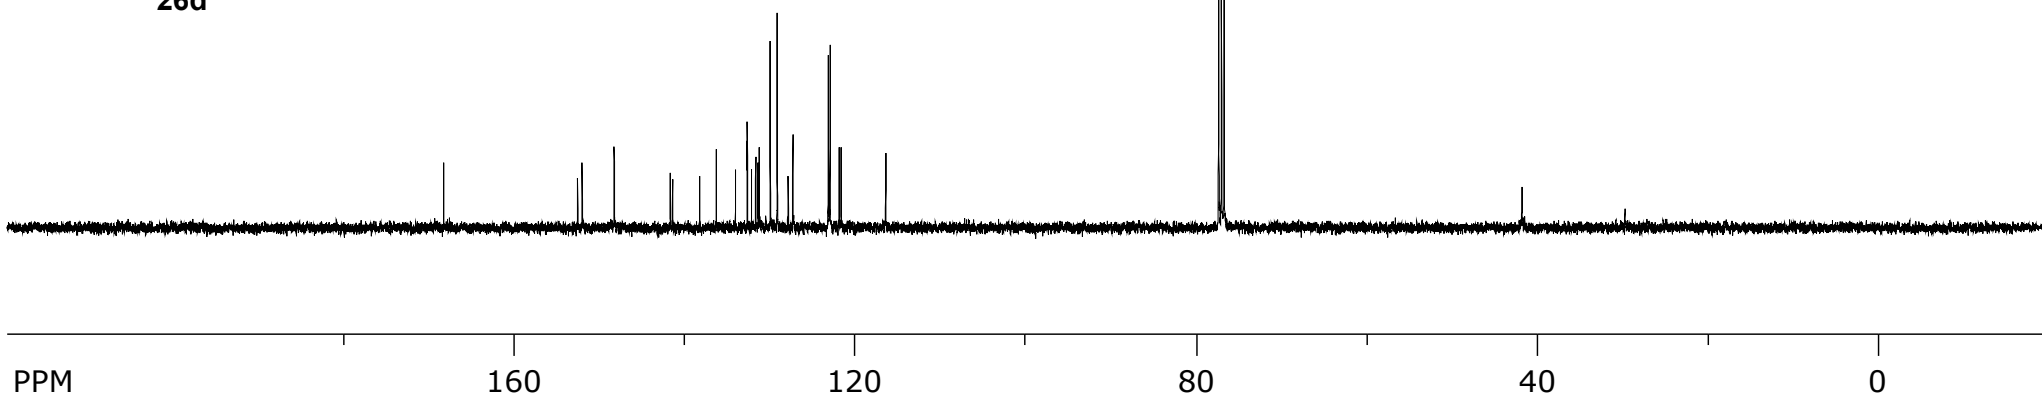



SpinWorks 4: SS 774  
C13CPD256 CDCl3 /opt/topspin3.5pl2/nmrdata nmrsu 16

168.263 —  
152.027 —  
152.553 —  
148.269 —  
141.429 —  
141.680 —  
138.252 —  
136.298 —  
134.065 —  
132.681 —  
132.660 —  
132.178 —  
131.674 —  
131.414 —  
131.271 —  
129.969 —  
127.858 —  
127.322 —  
123.173 —  
122.959 —  
121.881 —  
121.664 —  
116.427 —



**26d**

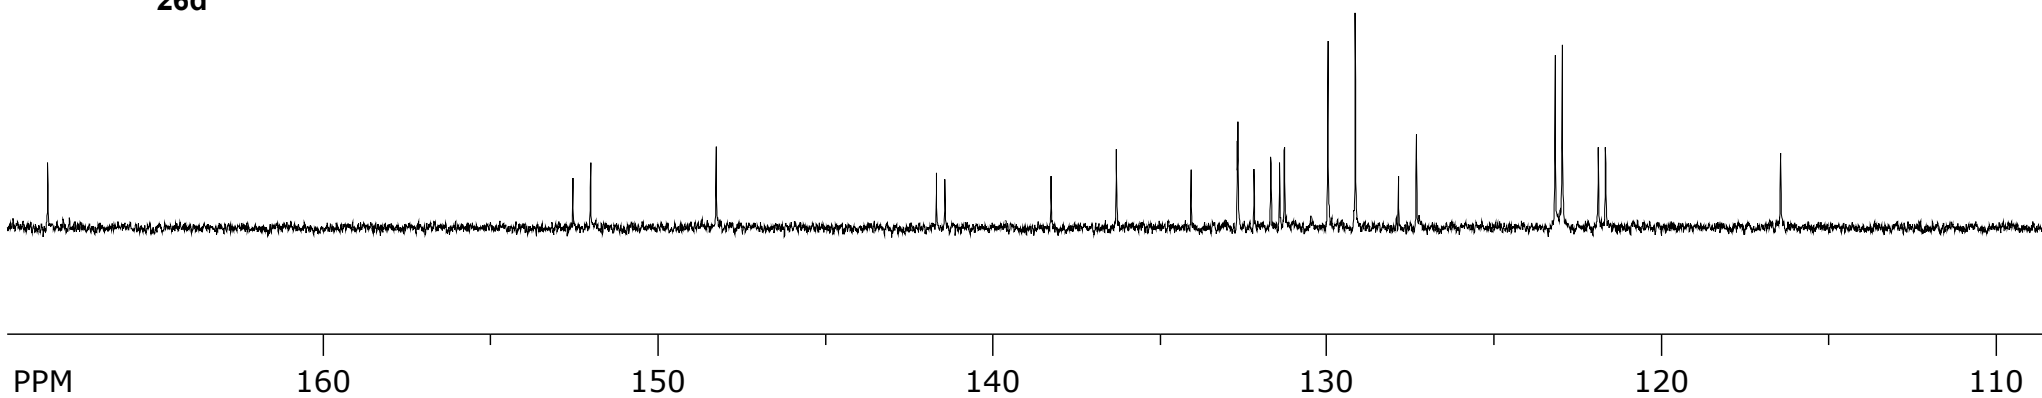

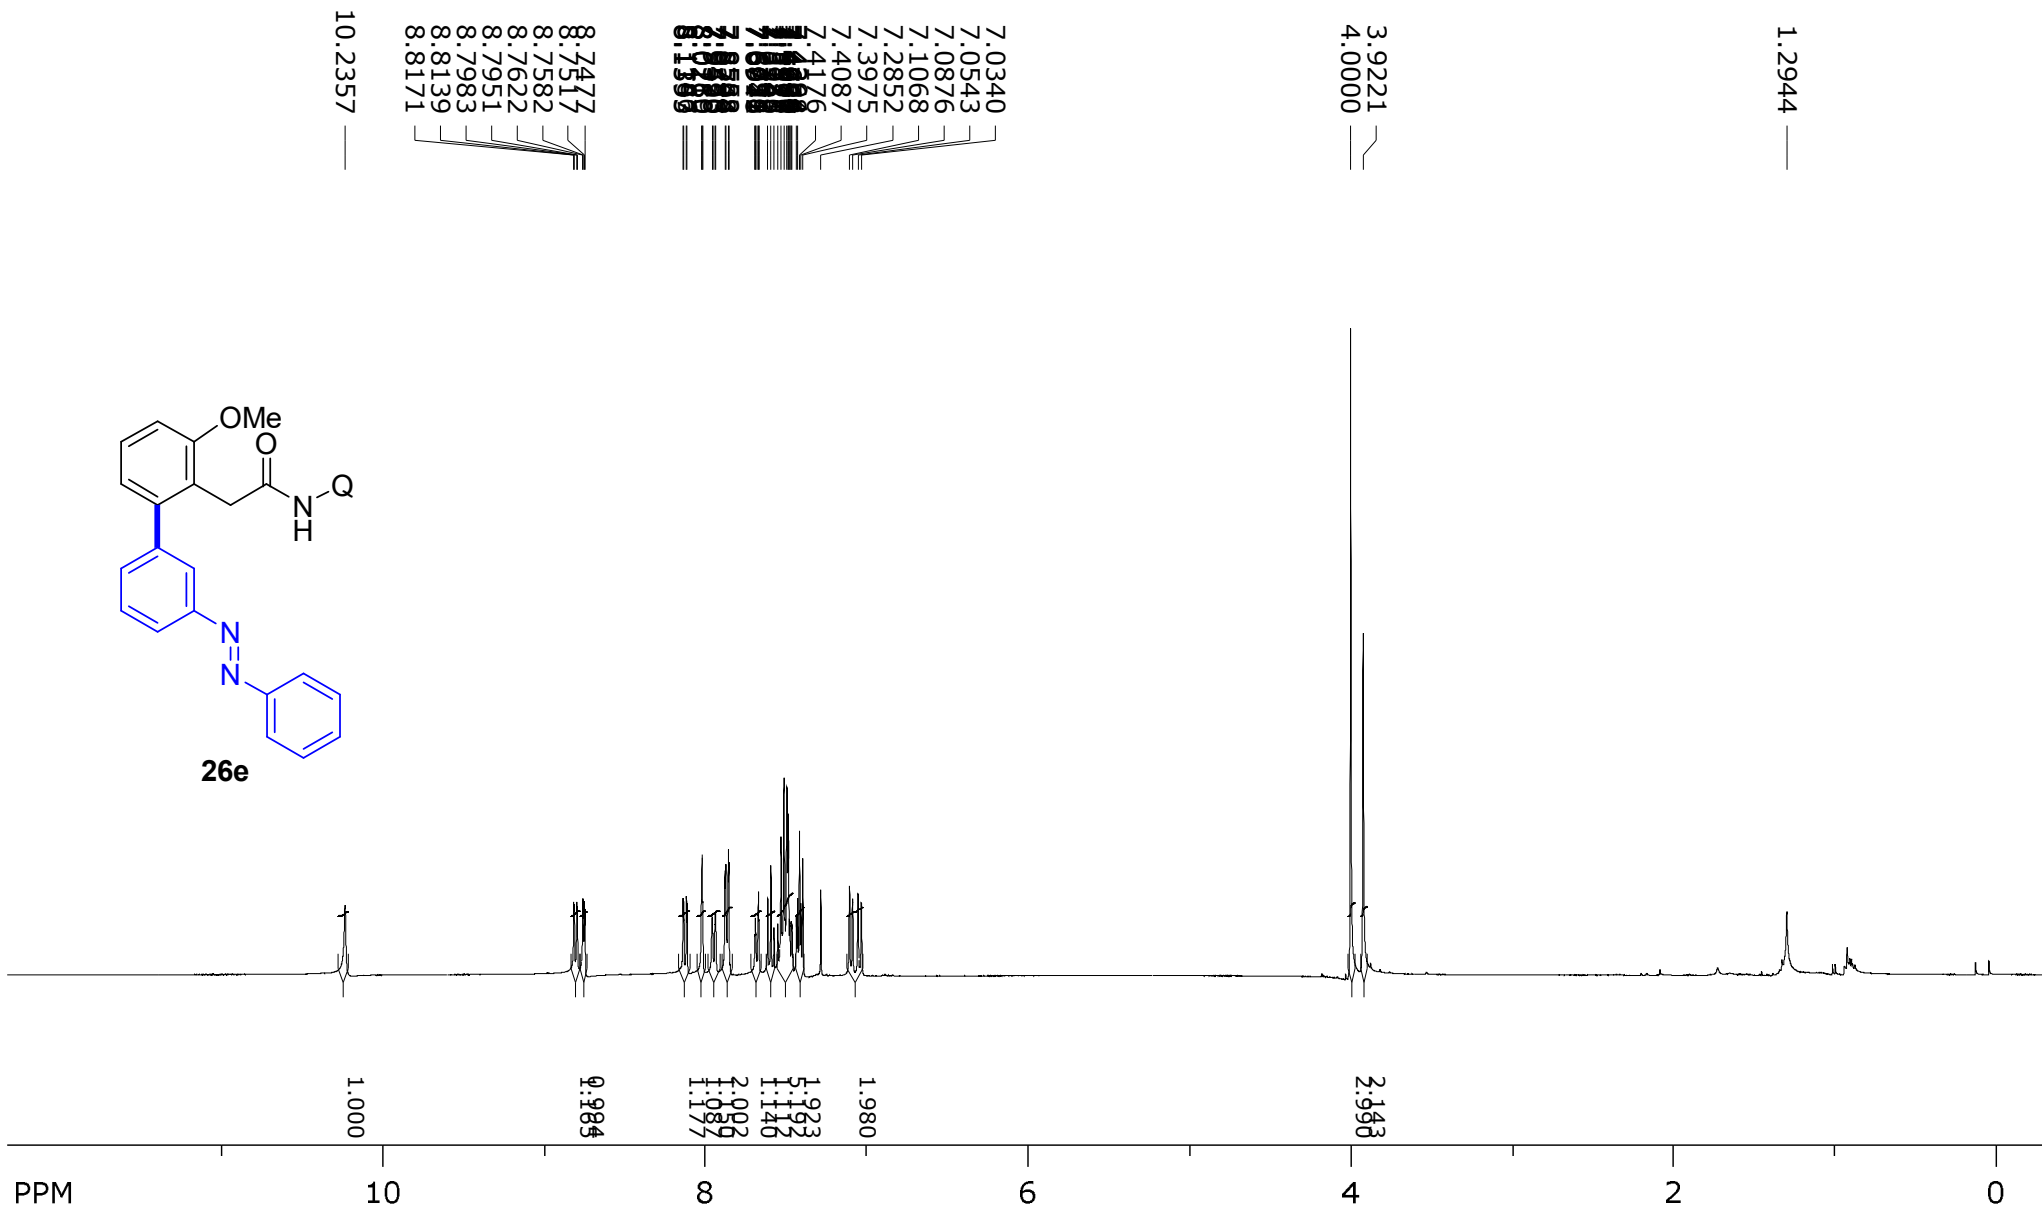

8.7477  
8.7517  
8.7582  
8.7622  
8.7951  
8.7983  
8.8139  
8.8171

8.1146  
8.1187  
8.1353  
8.1393

8.0180  
8.0219  
8.0260

7.9356  
7.9423  
7.9550  
7.9590

7.8553  
7.8588  
7.8748  
7.8794

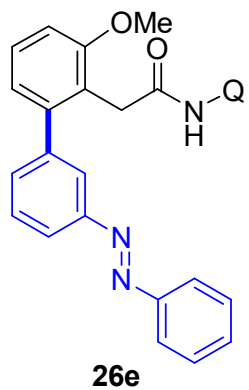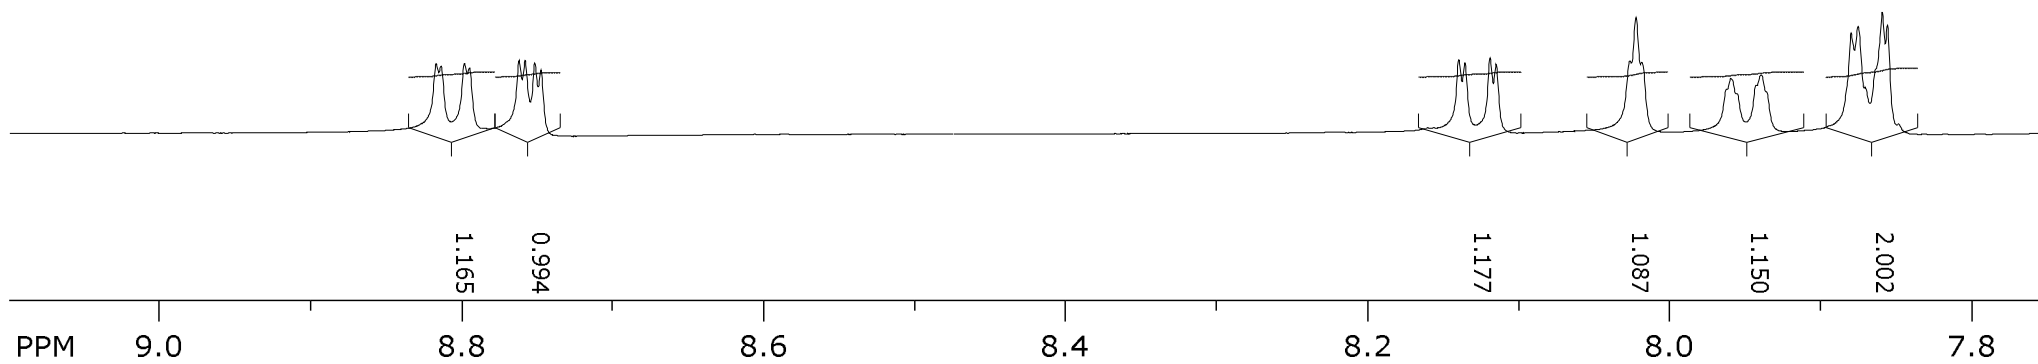

SpinWorks 4: ss-244-p

7.6691  
7.6721  
7.6758  
7.6879  
7.6912  
7.6946

7.5756  
7.5948  
7.6142  
7.5521  
7.5317  
7.5136  
7.4951  
7.4889  
7.4852  
7.4790  
7.4768  
7.4678  
7.4644  
7.4368  
7.4294  
7.4176  
7.3975

7.2852

7.1068  
7.0876  
7.0543  
7.0340

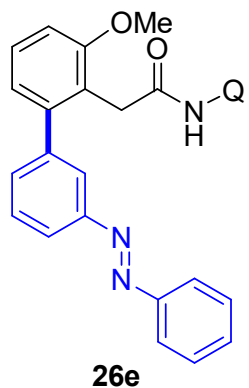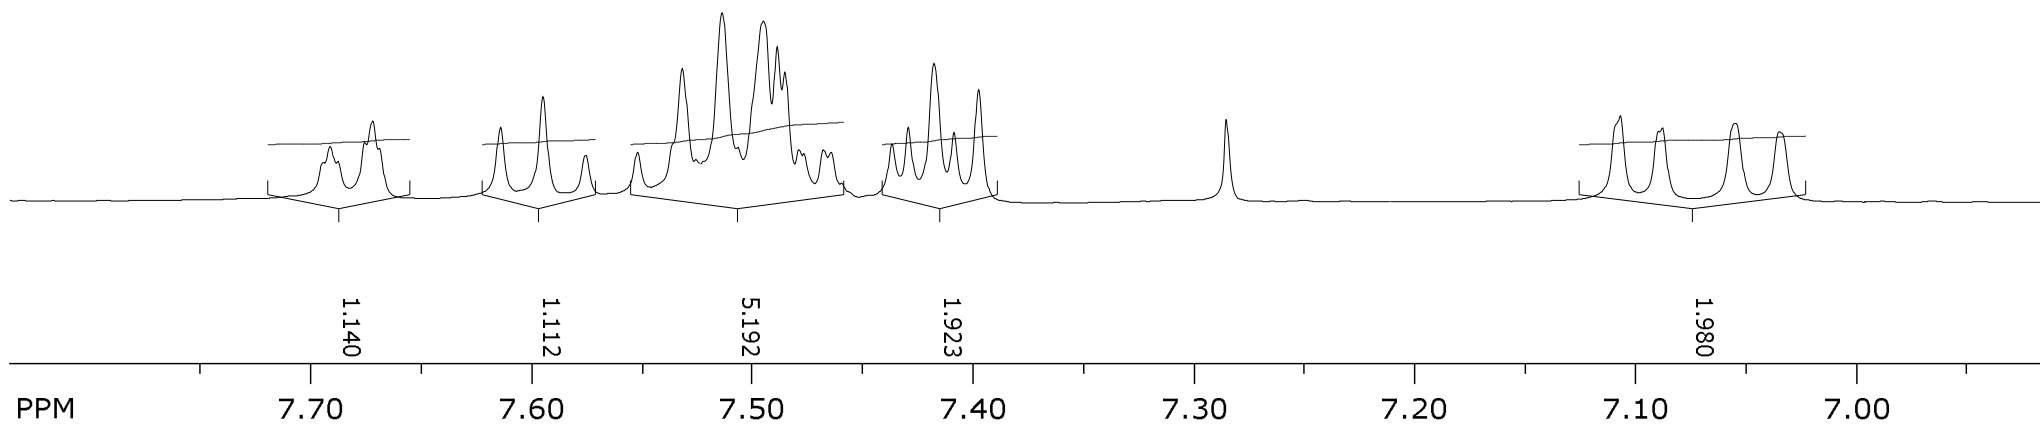

SpinWorks 4: SS 244 P  
C13CPD CDCl3 /opt/topspin3.5pl2/nmrdata nmrsu 51

169.988 —  
157.895 —  
152.500 —  
147.998 —  
143.674 —  
141.907 —  
138.574 —  
136.189 —  
134.956 —  
132.271 —  
130.988 —  
129.035 —  
128.975 —  
128.430 —  
123.498 —  
122.815 —  
122.231 —  
121.676 —  
121.439 —  
121.194 —  
116.465 —  
109.753 —

77.390 —  
77.072 —  
76.755 —

55.909 —

37.295 —

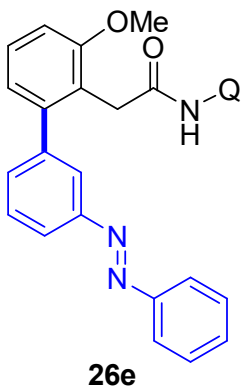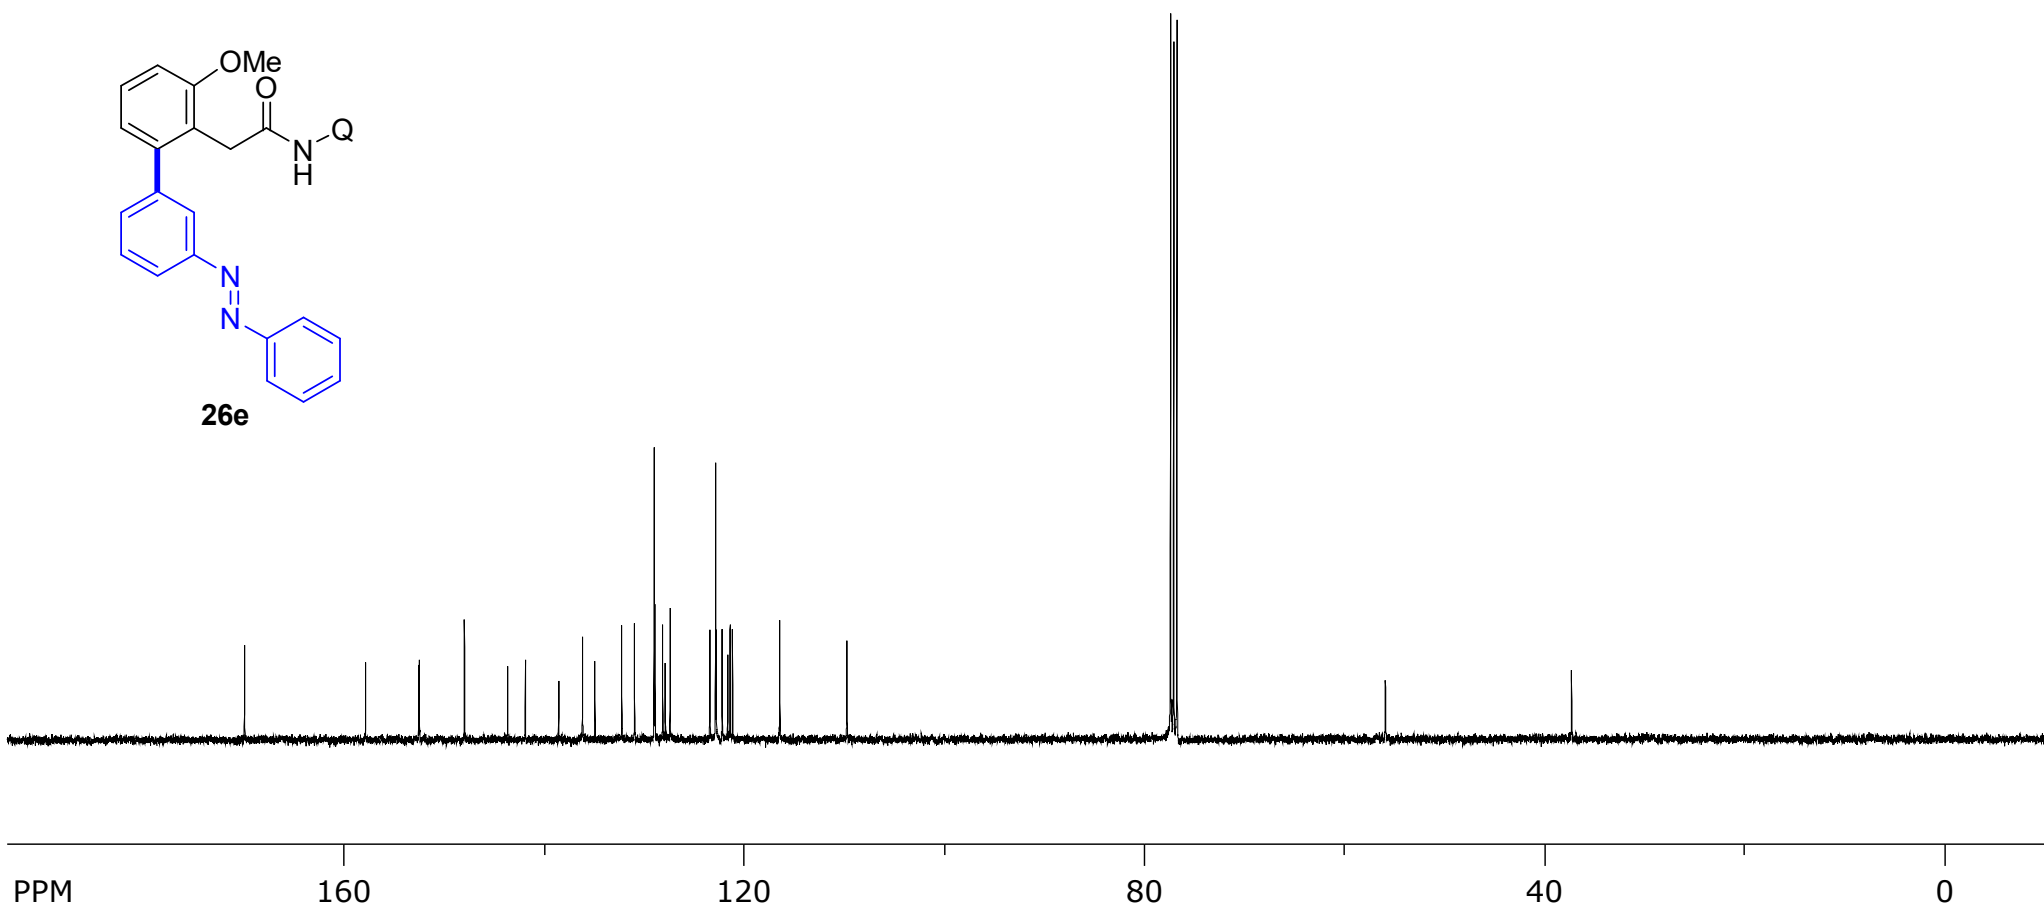

SpinWorks 4: SS 244 P  
C13CPD CDCl3 /opt/topspin3.5pl2/nmrdata nmrsu 51

169.988 —  
157.895 —  
152.500 —  
152.586 —  
147.998 —  
143.674 —  
141.907 —  
138.574 —  
136.189 —  
134.956 —  
132.271 —  
130.988 —  
129.035 —  
128.945 —  
128.174 —  
127.920 —  
127.432 —  
123.458 —  
122.896 —  
122.815 —  
122.231 —  
121.676 —  
121.439 —  
121.194 —  
116.465 —  
109.753 —

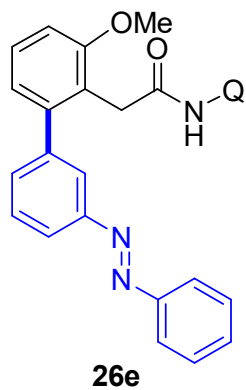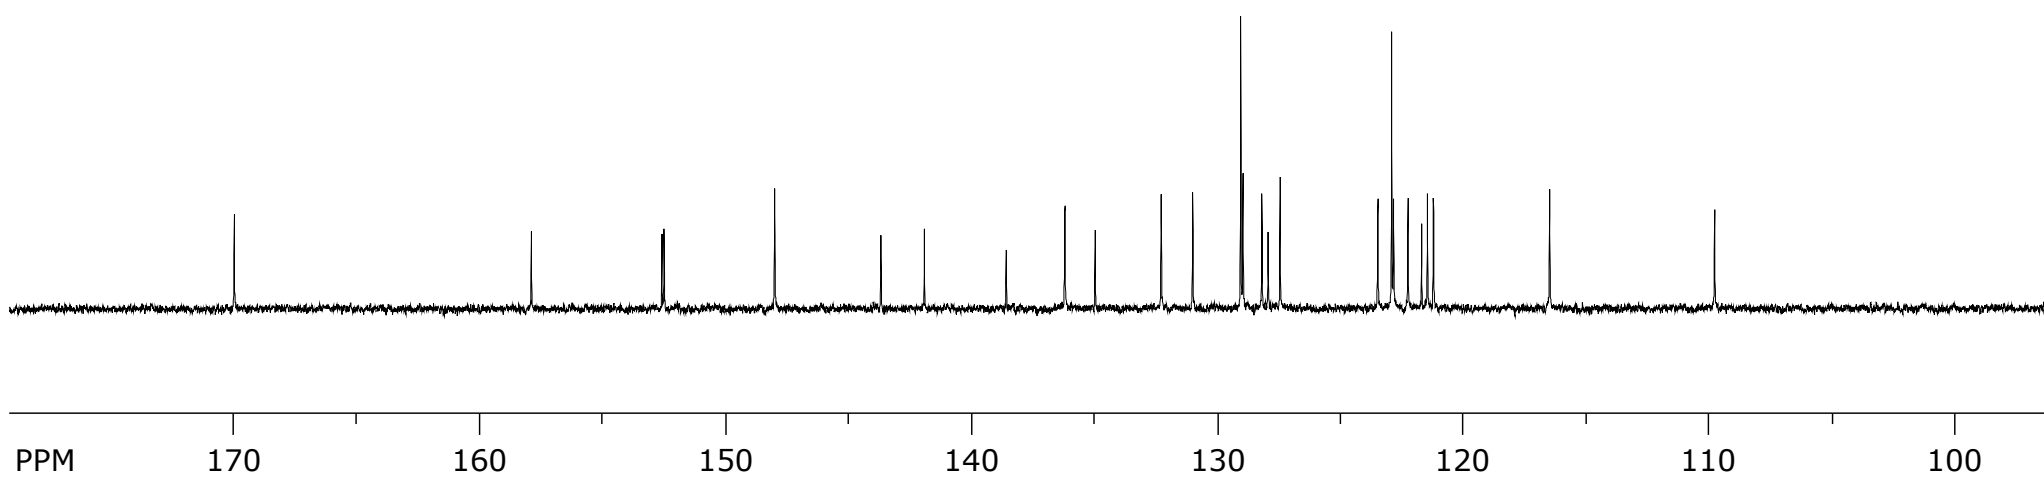

SpinWorks 4: ss-748 rep  
PROTON CDCl3 /opt/topspin3.5pl2/nmrdata nmrsu 3

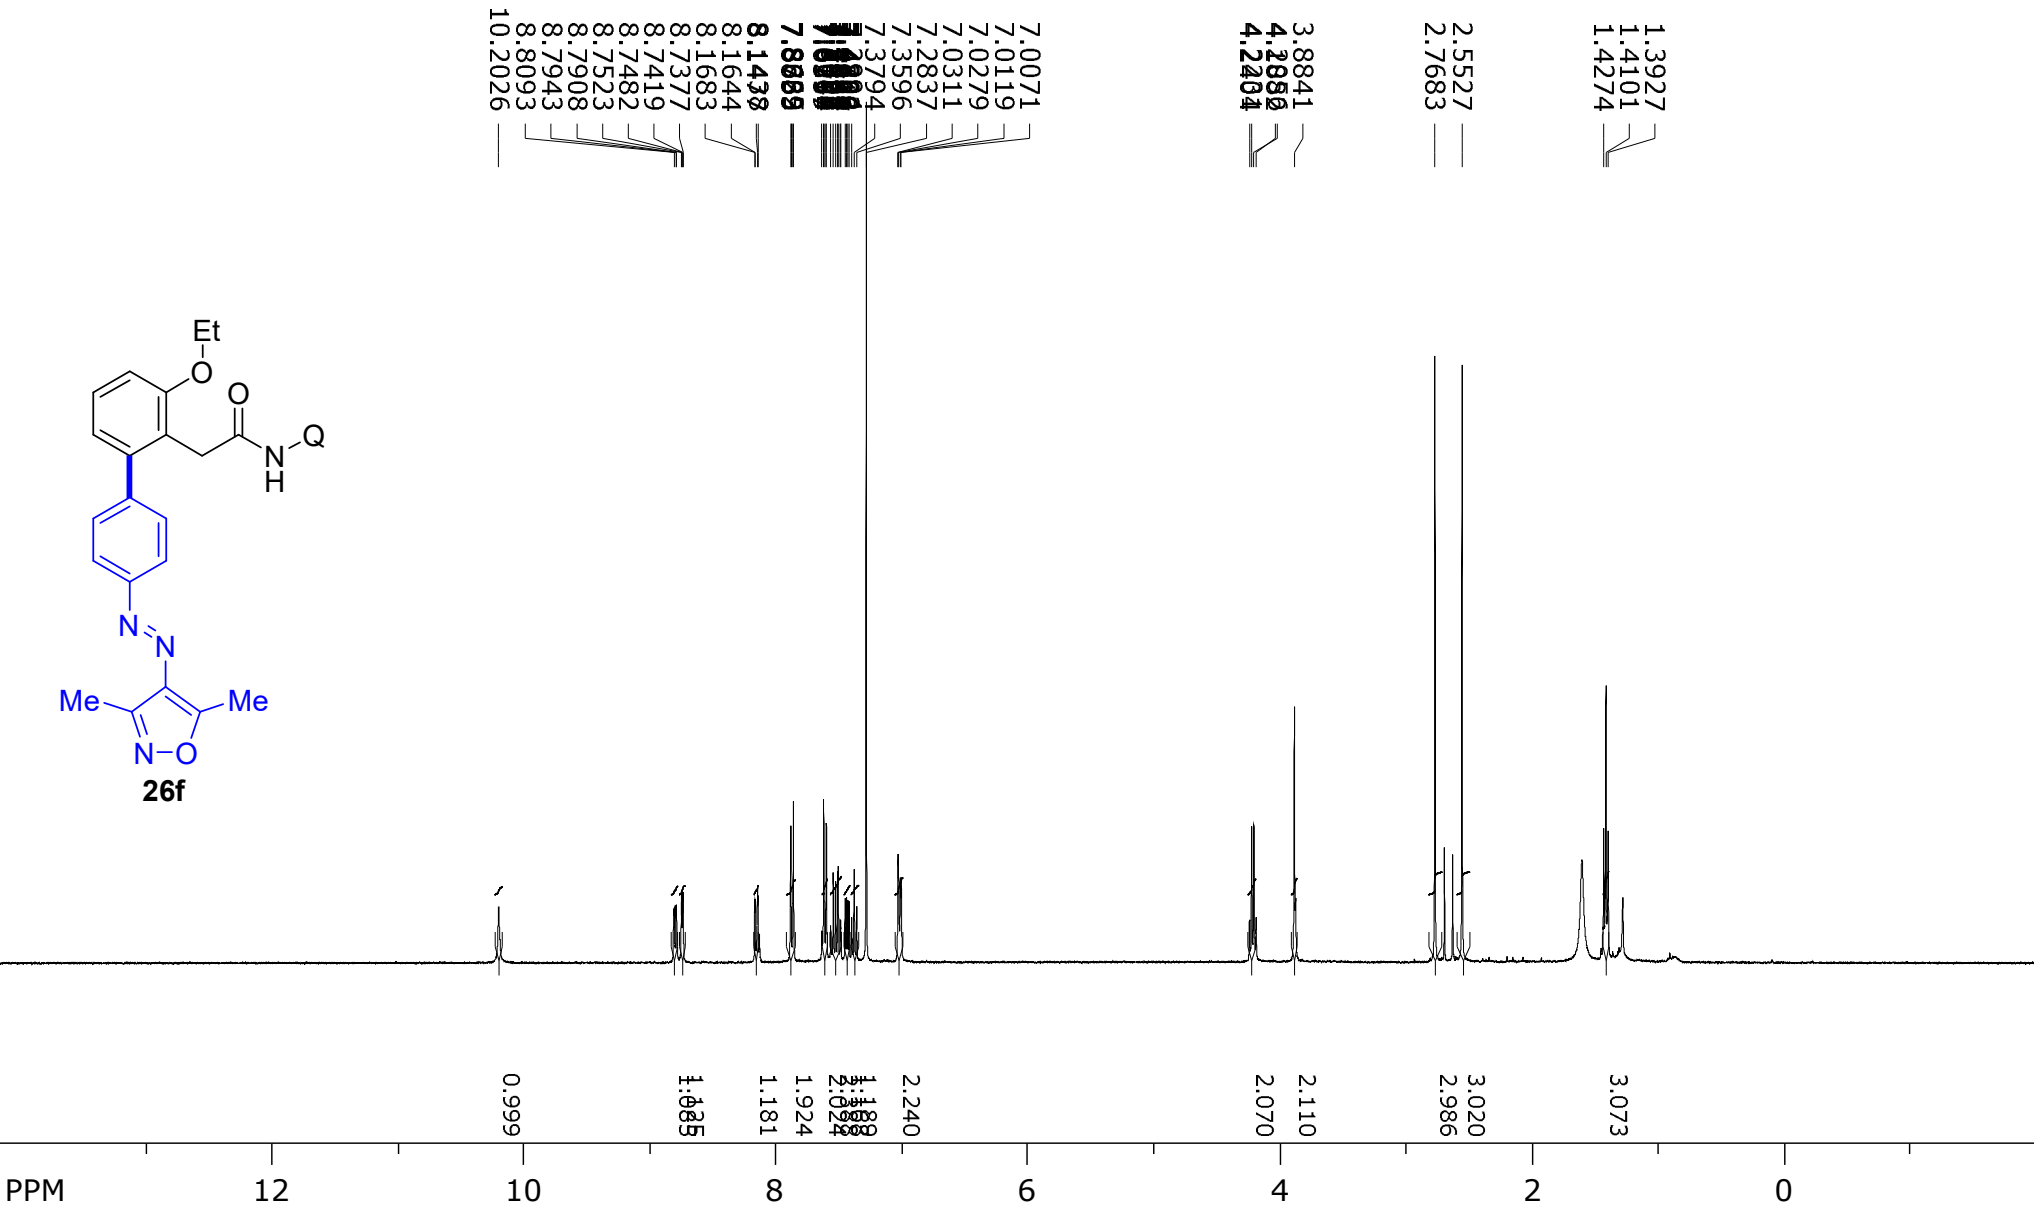

SpinWorks 4: ss-748 rep  
PROTON CDCl3 /opt/topspin3.5pl2/nmrdata nmrsu 3

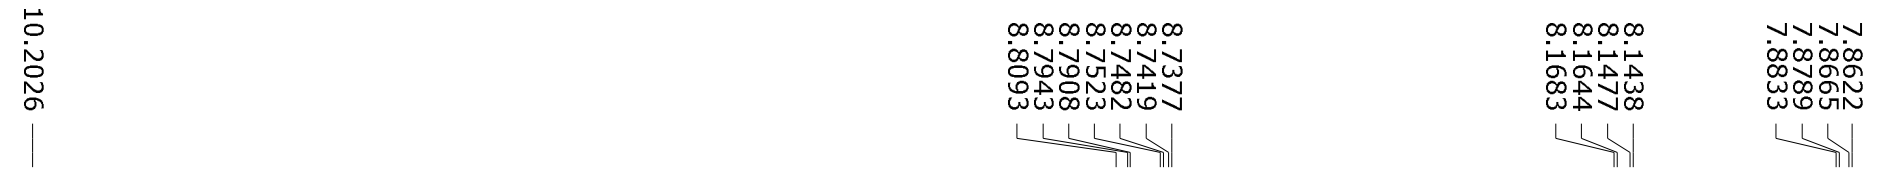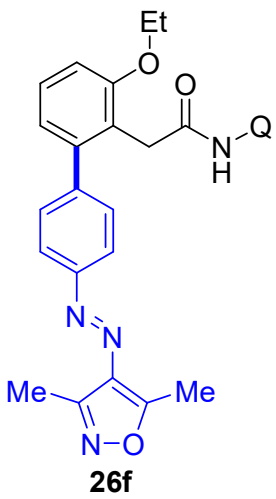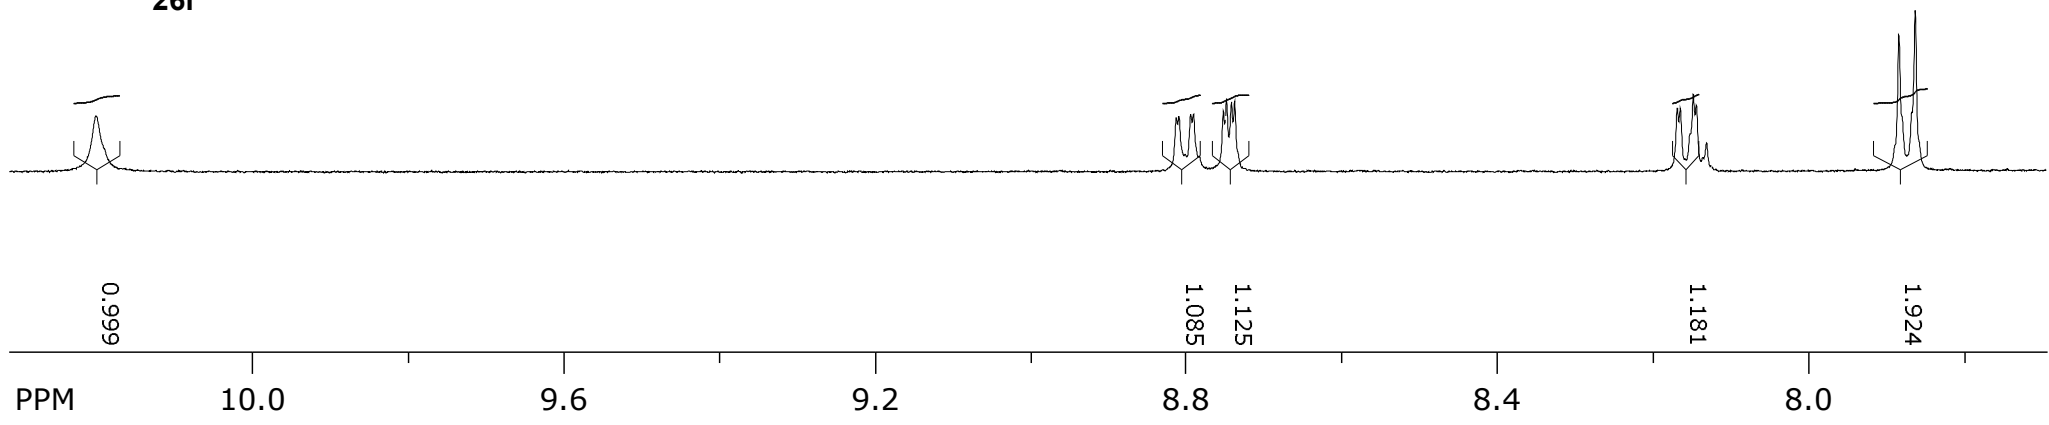



SpinWorks 4: ss-748 rep  
PROTON CDCl3 /opt/topspin3.5pl2/nmrdata nmrsu 3

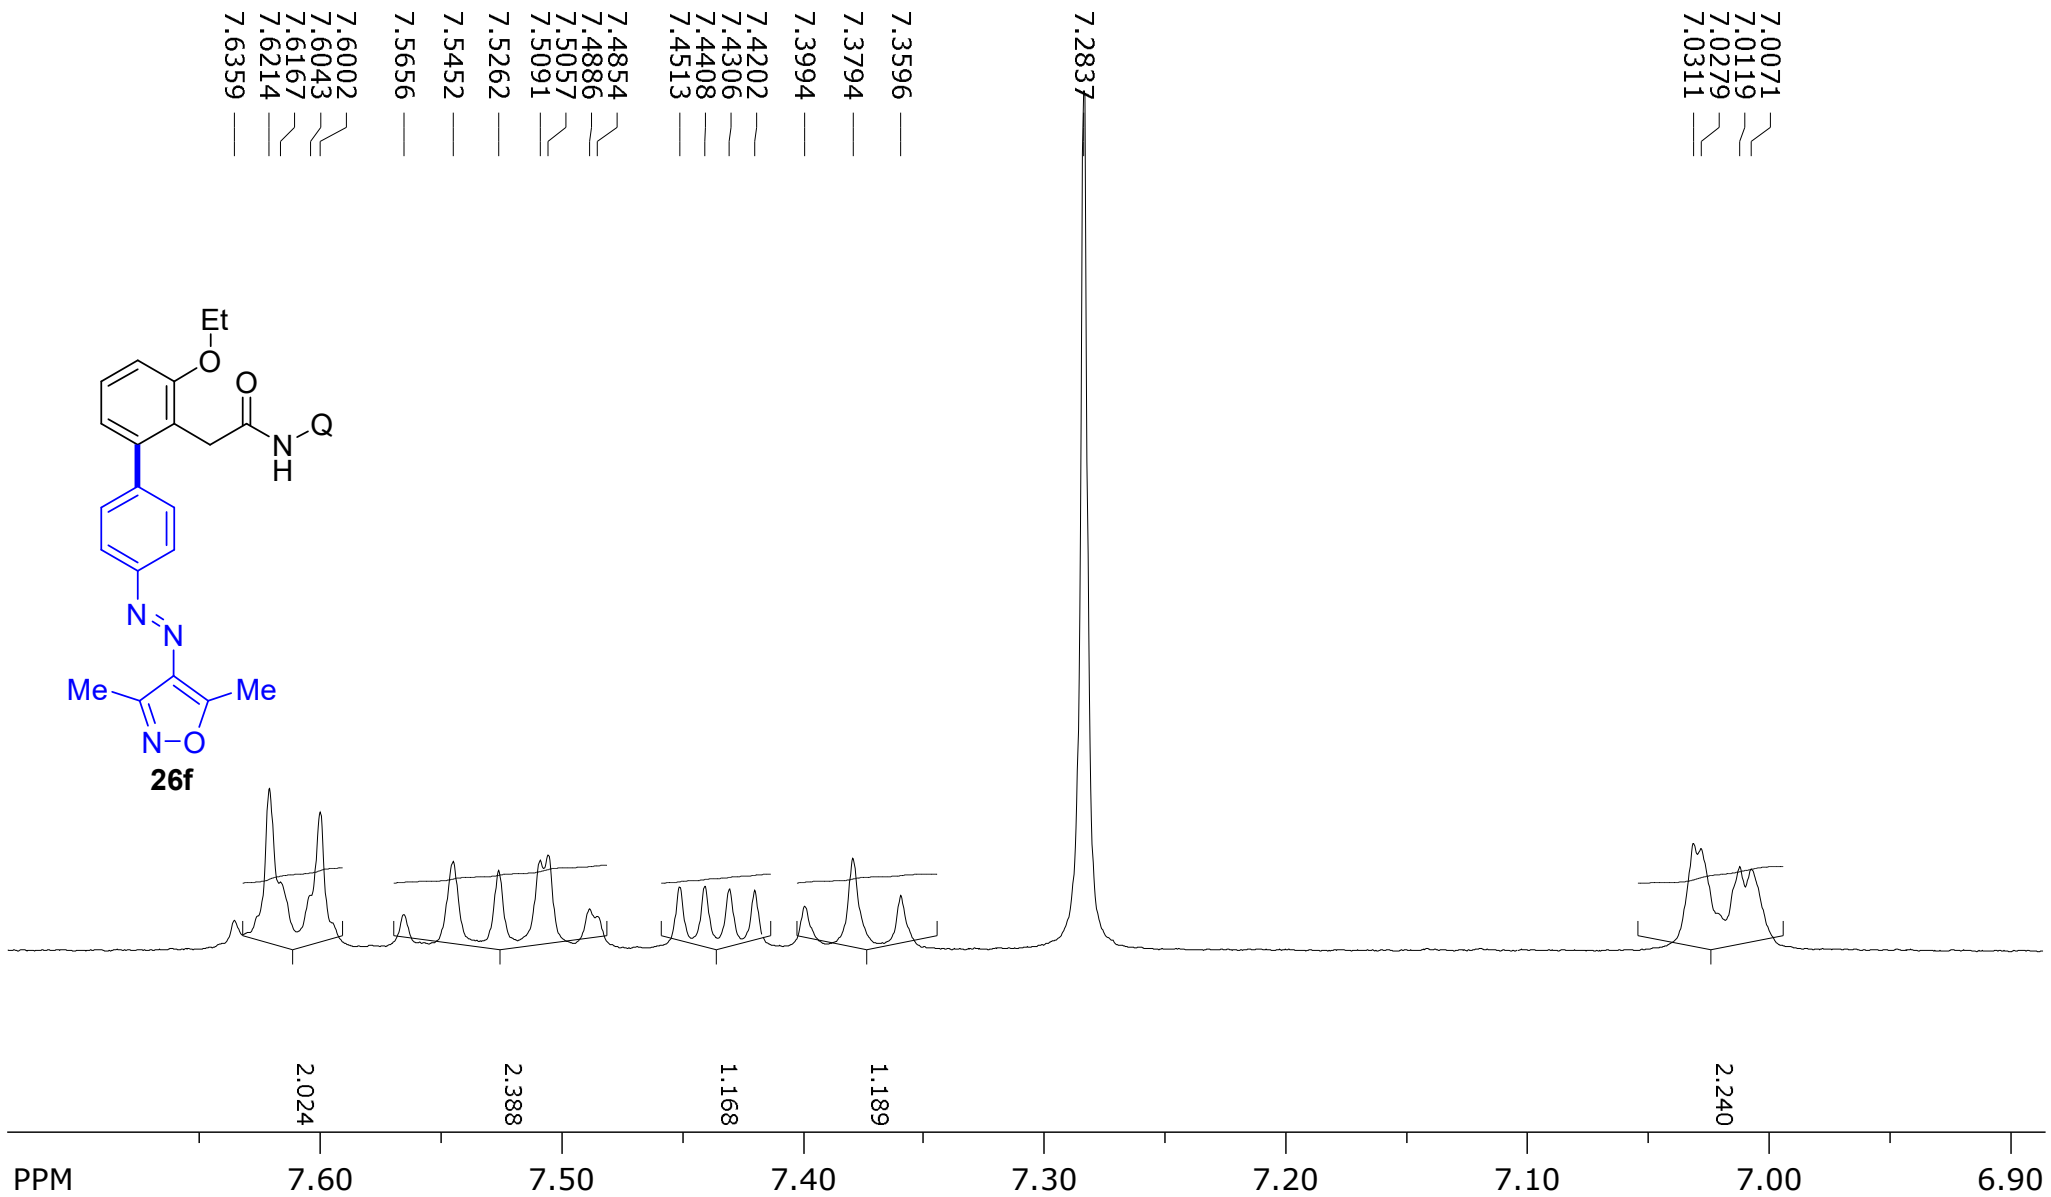

SpinWorks 4: ss-748 rep  
PROTON CDCl3 /opt/topspin3.5pl2/nmrdata nmrsu 3

4.1882  
4.2056  
4.2231  
4.2404

3.8841

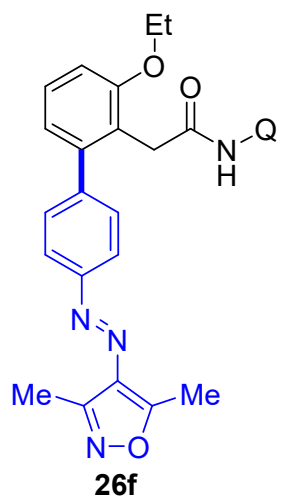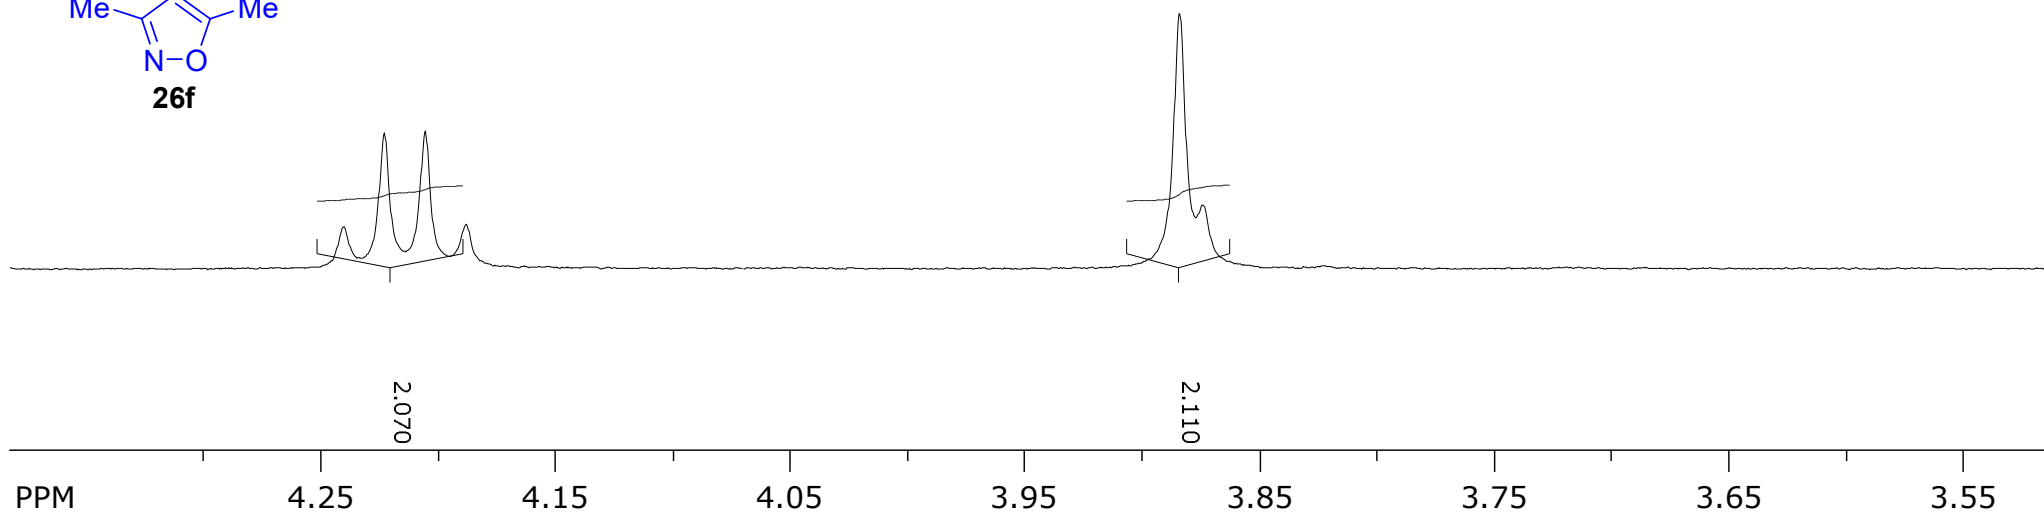

SpinWorks 4: ss-748 rep  
PROTON CDCl3 /opt/topspin3.5pl2/nmrdata nmrsu 3

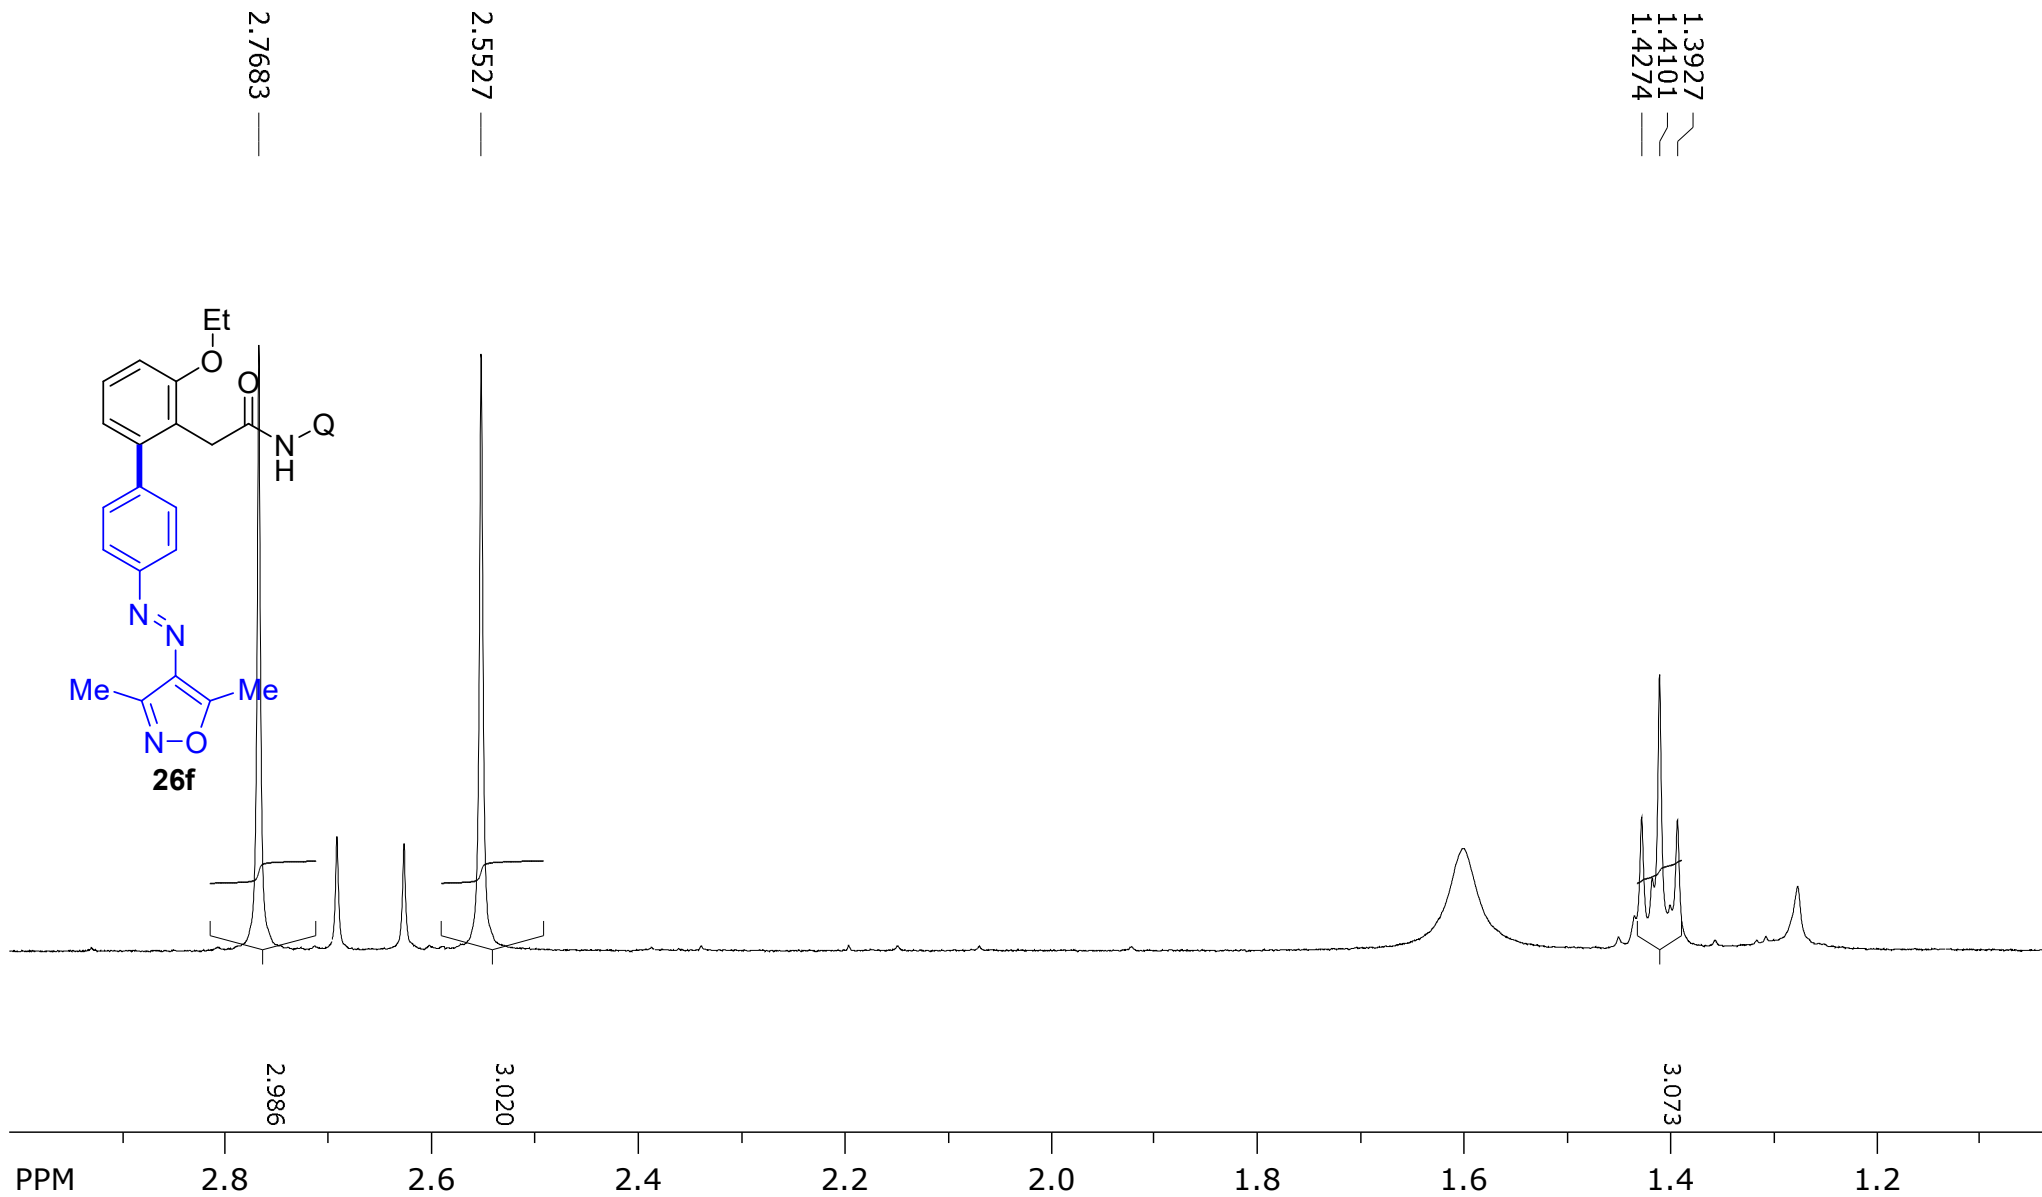

SpinWorks 4: SS-748 REP  
C13CPD256 CDCl3 /opt/topspin3.5pl2/nmrdata nmrsu 8

110.584  
116.439  
121.231  
121.462  
121.762  
122.074  
122.342  
127.458  
127.943  
128.103  
130.337  
130.569  
132.551  
134.951  
135.957  
136.227  
138.559  
147.906  
151.917  
153.800  
157.253  
169.374  
170.240

76.717  
77.035  
77.353  
64.128  
37.449  
11.658  
12.167  
14.756

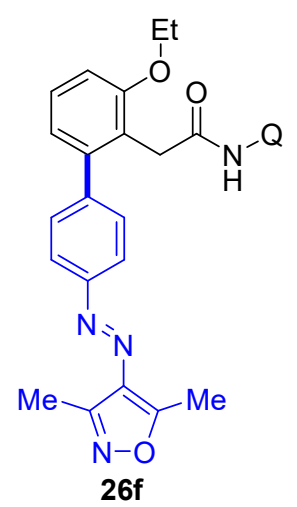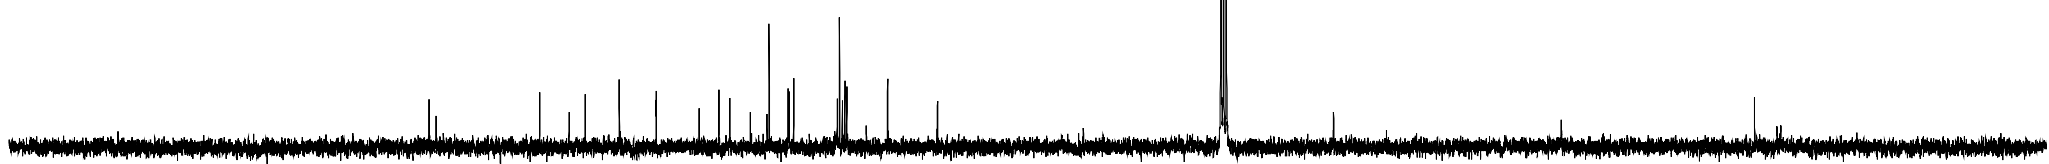

PPM 160 120 80 40 0

SpinWorks 3: SS-748 REP

110.5838  
116.4388  
121.2306  
121.4618  
121.7622  
122.0737  
122.3419  
127.4576  
127.9430  
128.1028  
130.3368  
130.5687  
132.5511  
134.9506  
136.2267  
138.5591  
143.5607  
143.5815  
147.9065  
151.9168  
153.8002  
157.2532  
169.3741  
170.2400  
76.7171  
77.0349  
77.3525  
64.1282  
37.4494  
11.6812  
11.7142  
12.1309  
12.1589  
14.7565

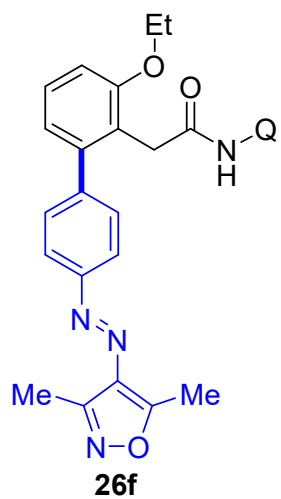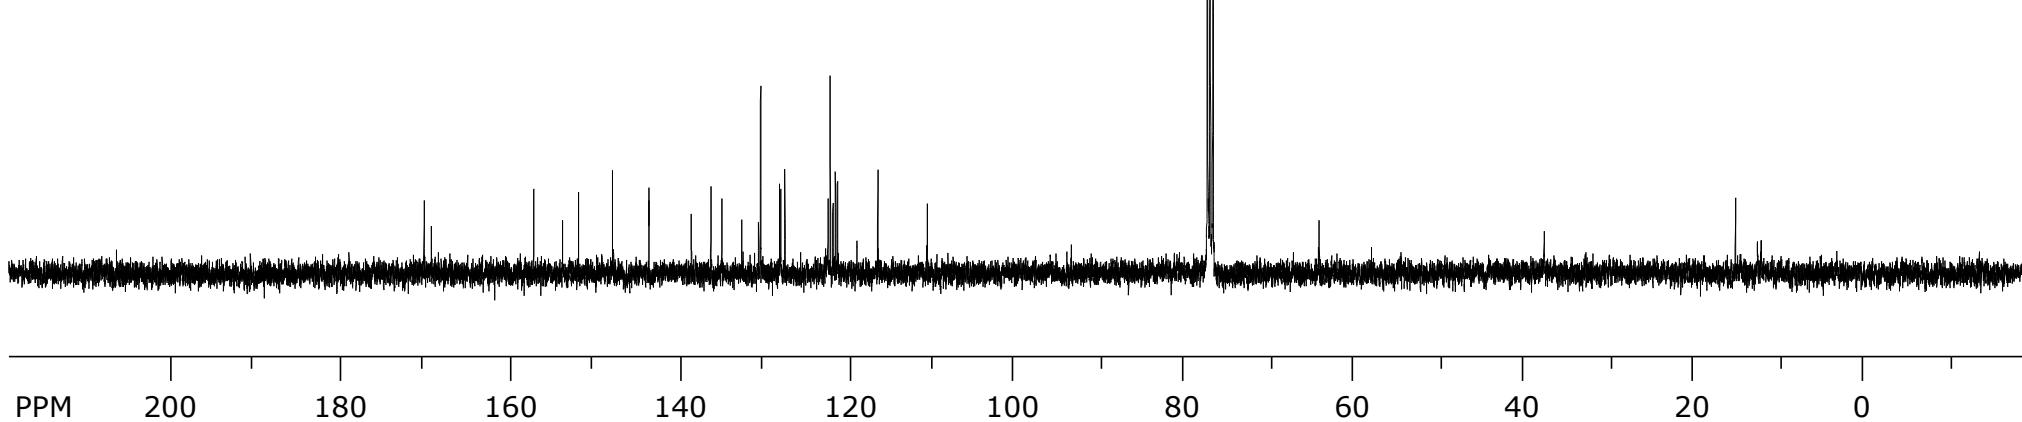

SpinWorks 4: SS-748 REP  
C13CPD256 CDCl3 /opt/topspin3.5pl2/nmrdata nmrsu 8

169.374 —  
170.240 —  
157.253 —  
153.800 —  
151.917 —  
147.906 —  
143.567 —  
138.559 —  
136.227 —  
134.951 —  
132.551 —  
130.569 —  
130.337 —  
128.103 —  
127.943 —  
127.458 —  
122.342 —  
122.074 —  
121.762 —  
121.462 —  
121.231 —  
116.439 —  
110.584 —

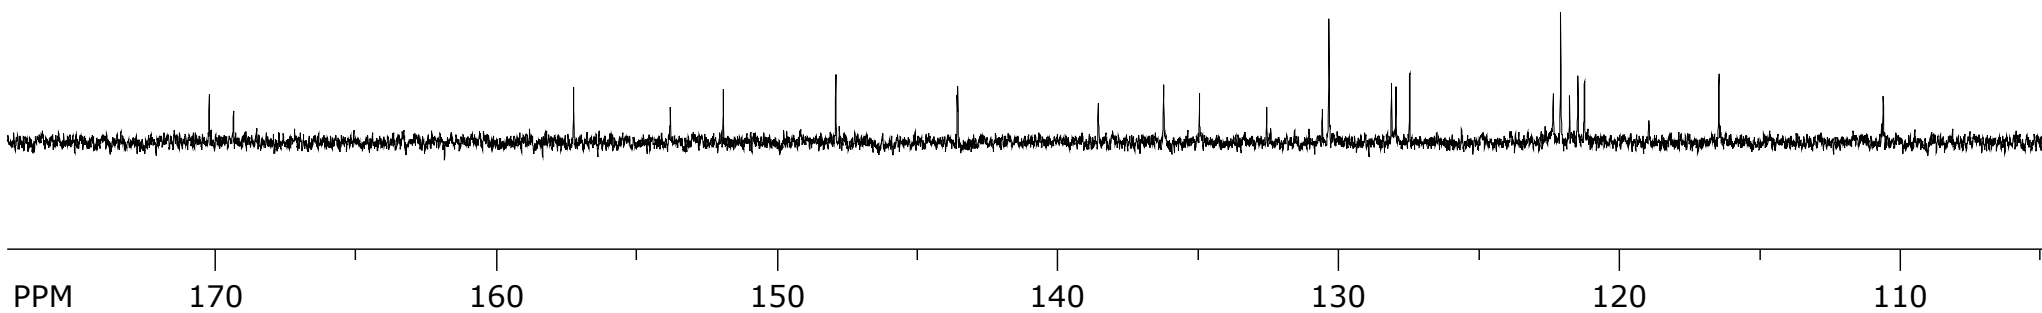

SpinWorks 3: SS-748 REP

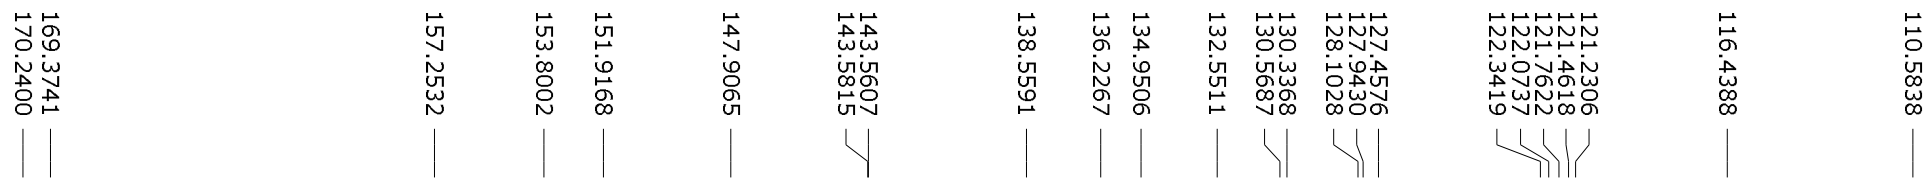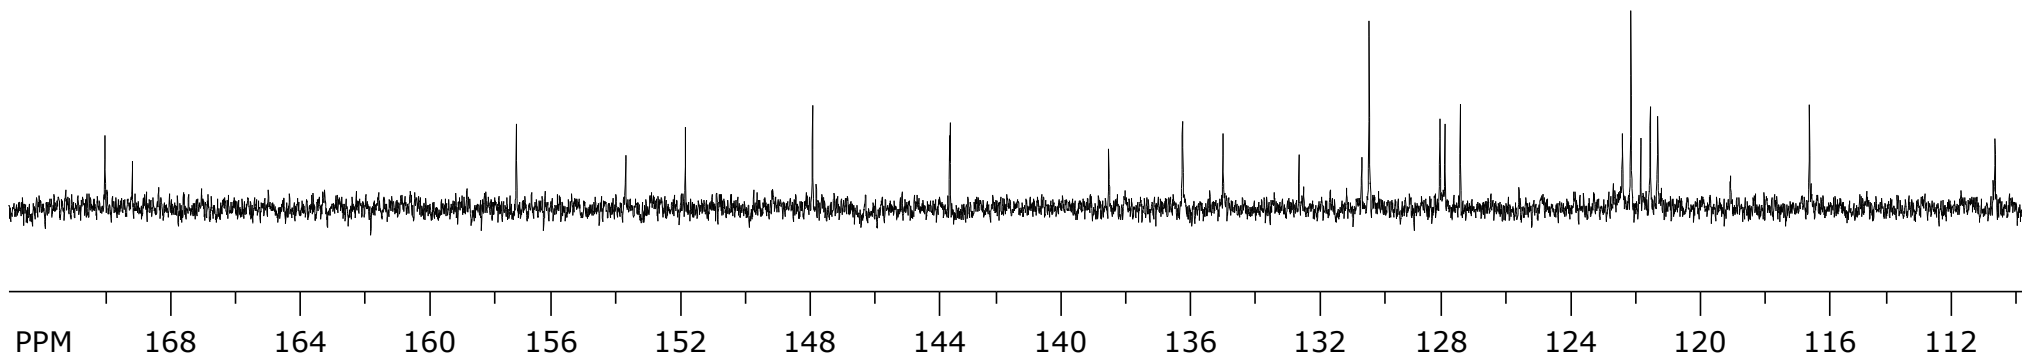

SpinWorks 4: SS-748 REP  
C13CPD256 CDCl3 /opt/topspin3.5pl2/nmrdata nmrsu 8

64.128 —

37.449 —

14.756 —

11.658 —  
12.167 —

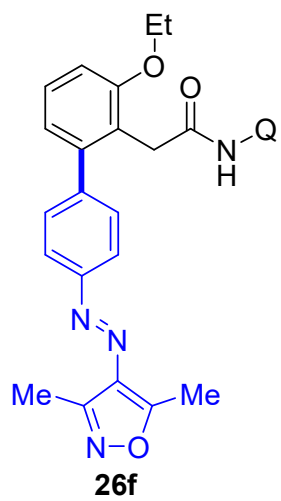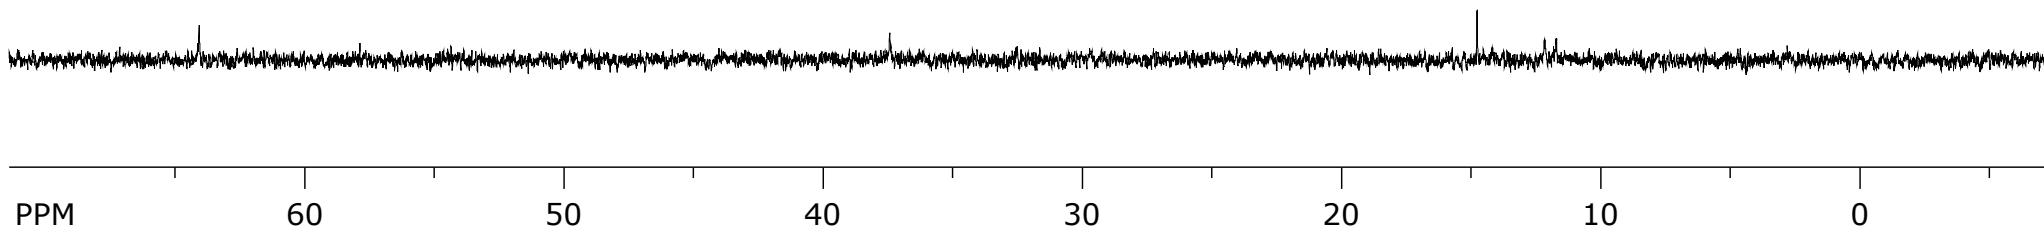



SpinWorks 4: SS-773-11  
PROTON CDCl3 /opt/topspin3.5pl2/nmrdata nmrsu 2

8.5693  
8.5759  
8.5800  
8.6385  
8.6417  
8.6571  
8.6603  
9.4082  
  
7.1945  
7.2050  
7.2152  
7.2257  
7.2836  
7.4329  
7.4357  
7.4537  
7.4620  
7.4680  
7.4700  
7.4720  
7.4740  
7.4760  
7.4780  
7.4800  
7.4820  
7.4840  
7.4860  
7.4880  
7.4900  
7.4920  
7.4940  
7.4960  
7.4980  
7.5000  
7.5020  
7.5040  
7.5060  
7.5080  
7.5100  
7.5120  
7.5140  
7.5160  
7.5180  
7.5200  
7.5220  
7.5240  
7.5260  
7.5280  
7.5300  
7.5320  
7.5340  
7.5360  
7.5380  
7.5400  
7.5420  
7.5440  
7.5460  
7.5480  
7.5500  
7.5520  
7.5540  
7.5560  
7.5580  
7.5600  
7.5620  
7.5640  
7.5660  
7.5680  
7.5700  
7.5720  
7.5740  
7.5760  
7.5780  
7.5800  
7.5820  
7.5840  
7.5860  
7.5880  
7.5900  
7.5920  
7.5940  
7.5960  
7.5980  
7.6000  
7.6020  
7.6040  
7.6060  
7.6080  
7.6100  
7.6120  
7.6140  
7.6160  
7.6180  
7.6200  
7.6220  
7.6240  
7.6260  
7.6280  
7.6300  
7.6320  
7.6340  
7.6360  
7.6380  
7.6400  
7.6420  
7.6440  
7.6460  
7.6480  
7.6500  
7.6520  
7.6540  
7.6560  
7.6580  
7.6600  
7.6620  
7.6640  
7.6660  
7.6680  
7.6700  
7.6720  
7.6740  
7.6760  
7.6780  
7.6800  
7.6820  
7.6840  
7.6860  
7.6880  
7.6900  
7.6920  
7.6940  
7.6960  
7.6980  
7.7000  
7.7020  
7.7040  
7.7060  
7.7080  
7.7100  
7.7120  
7.7140  
7.7160  
7.7180  
7.7200  
7.7220  
7.7240  
7.7260  
7.7280  
7.7300  
7.7320  
7.7340  
7.7360  
7.7380  
7.7400  
7.7420  
7.7440  
7.7460  
7.7480  
7.7500  
7.7520  
7.7540  
7.7560  
7.7580  
7.7600  
7.7620  
7.7640  
7.7660  
7.7680  
7.7700  
7.7720  
7.7740  
7.7760  
7.7780  
7.7800  
7.7820  
7.7840  
7.7860  
7.7880  
7.7900  
7.7920  
7.7940  
7.7960  
7.7980  
7.8000  
7.8020  
7.8040  
7.8060  
7.8080  
7.8100  
7.8120  
7.8140  
7.8160  
7.8180  
7.8200  
7.8220  
7.8240  
7.8260  
7.8280  
7.8300  
7.8320  
7.8340  
7.8360  
7.8380  
7.8400  
7.8420  
7.8440  
7.8460  
7.8480  
7.8500  
7.8520  
7.8540  
7.8560  
7.8580  
7.8600  
7.8620  
7.8640  
7.8660  
7.8680  
7.8700  
7.8720  
7.8740  
7.8760  
7.8780  
7.8800  
7.8820  
7.8840  
7.8860  
7.8880  
7.8900  
7.8920  
7.8940  
7.8960  
7.8980  
7.9000  
7.9020  
7.9040  
7.9060  
7.9080  
7.9100  
7.9120  
7.9140  
7.9160  
7.9180  
7.9200  
7.9220  
7.9240  
7.9260  
7.9280  
7.9300  
7.9320  
7.9340  
7.9360  
7.9380  
7.9400  
7.9420  
7.9440  
7.9460  
7.9480  
7.9500  
7.9520  
7.9540  
7.9560  
7.9580  
7.9600  
7.9620  
7.9640  
7.9660  
7.9680  
7.9700  
7.9720  
7.9740  
7.9760  
7.9780  
7.9800  
7.9820  
7.9840  
7.9860  
7.9880  
7.9900  
7.9920  
7.9940  
7.9960  
7.9980  
8.0000

3.8837

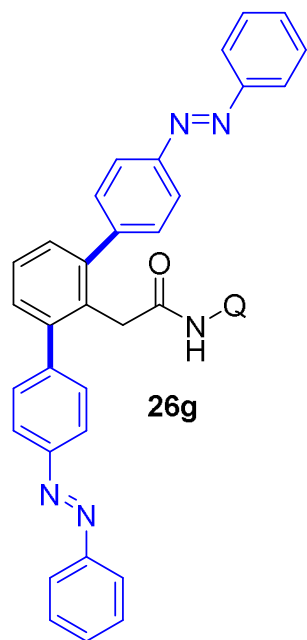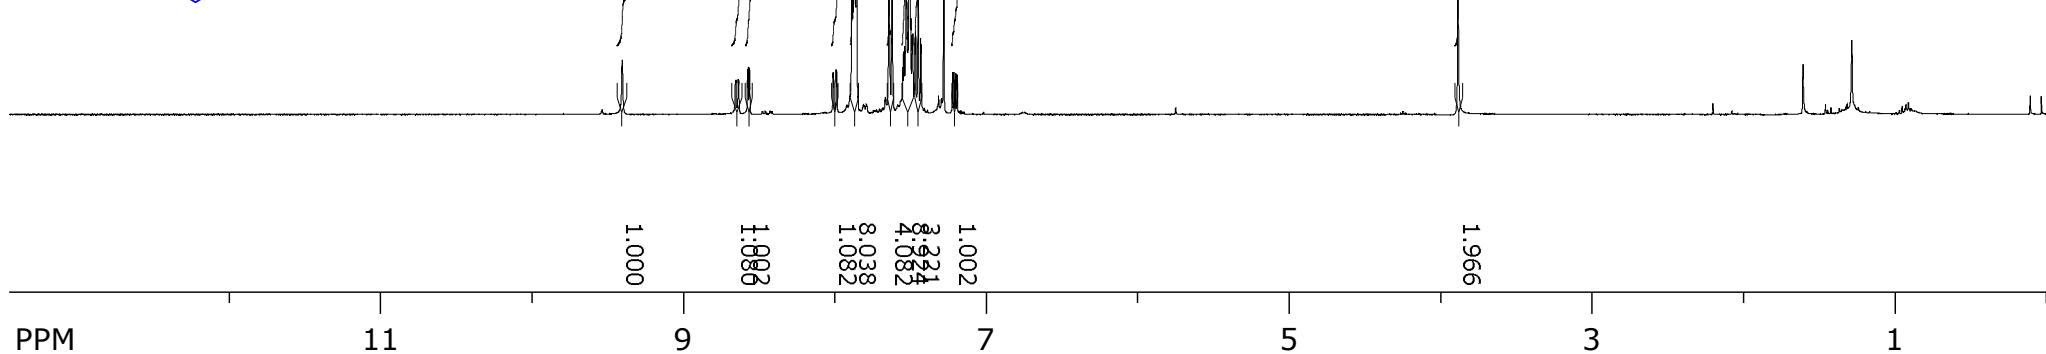

SpinWorks 4: SS-773-11  
PROTON CDCl3 /opt/topspin3.5pl2/nmrdata nmrsu 2

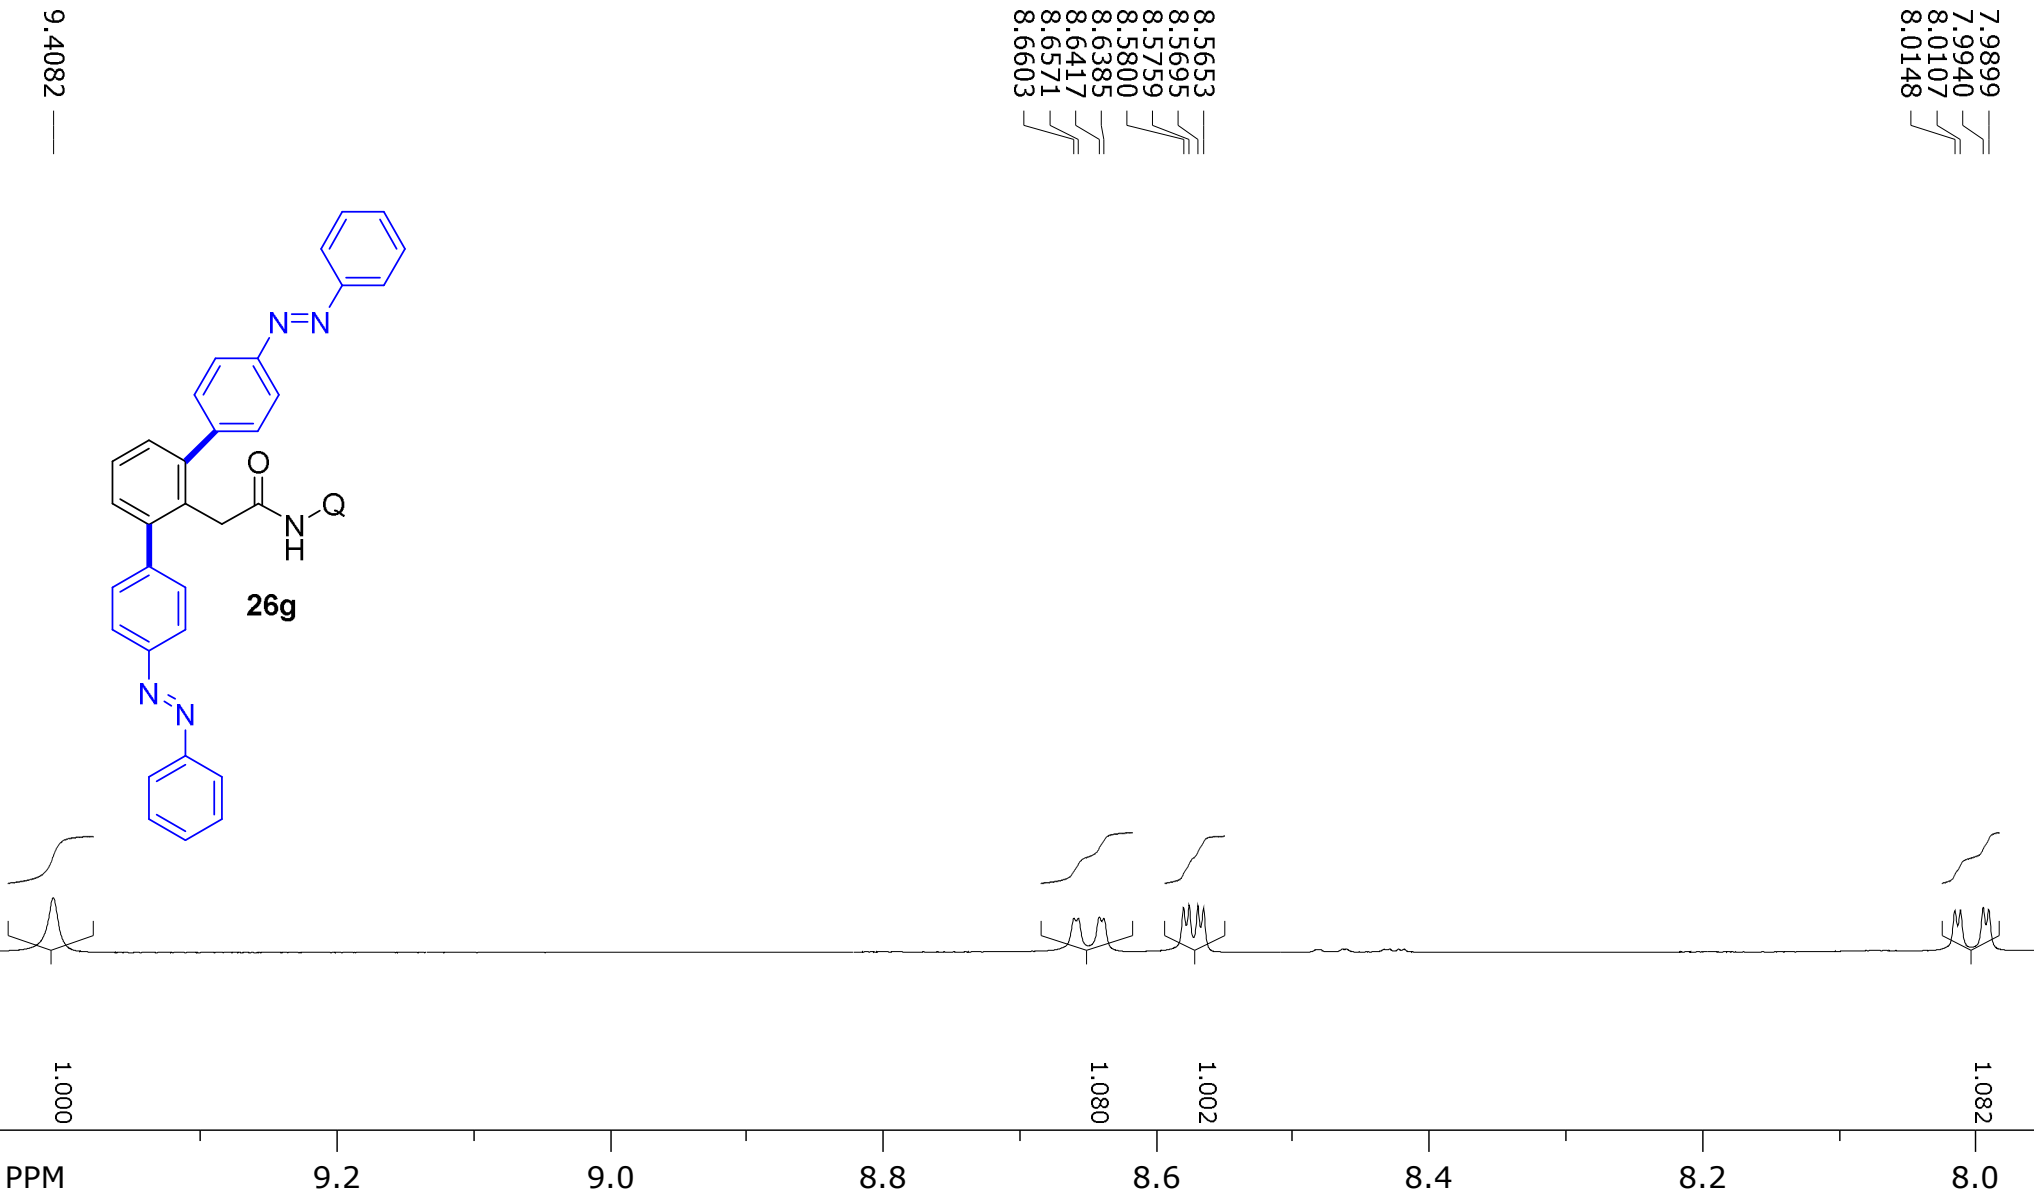

SpinWorks 4: SS-773-11  
PROTON CDCl3 /opt/topspin3.5pl2/nmrdata nmrsu 2

7.8499  
7.8568  
7.8600  
7.8641  
7.8684  
7.8731  
7.8768  
7.8809  
7.8847  
7.8896  
7.8945

7.6231  
7.6278  
7.6398  
7.6445

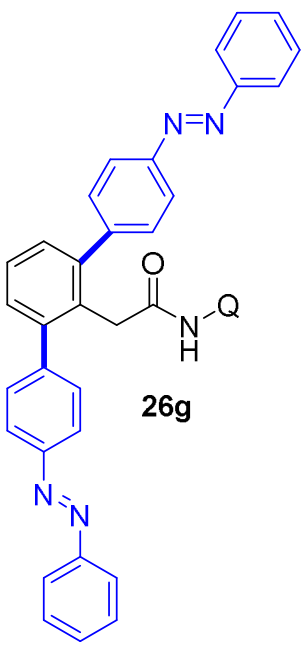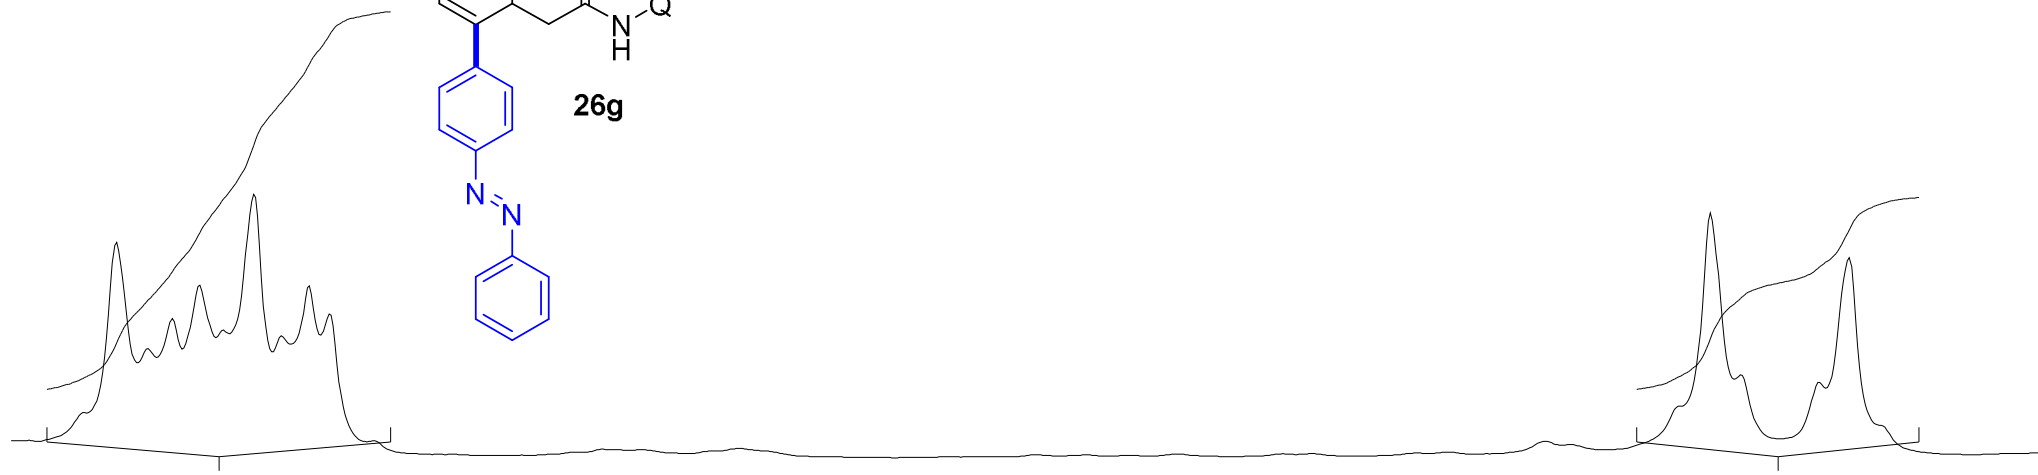

8.038

4.082

PPM 7.88 7.84 7.80 7.76 7.72 7.68 7.64 7.60

SpinWorks 4: SS-773-11  
PROTON CDCl3 /opt/topspin3.5pl2/nmrdata nmrsu 2

7.4329  
7.4357  
7.4530  
7.4688  
7.4723  
7.4780  
7.4880  
7.4918  
7.5007  
7.5048  
7.5130  
7.5167  
7.5224  
7.5278  
7.5317  
7.5383  
7.5435  
7.5480  
7.5534

7.1945  
7.2050  
7.2152  
7.2257  
7.2836

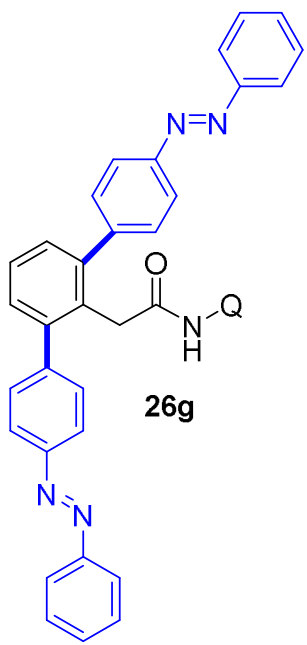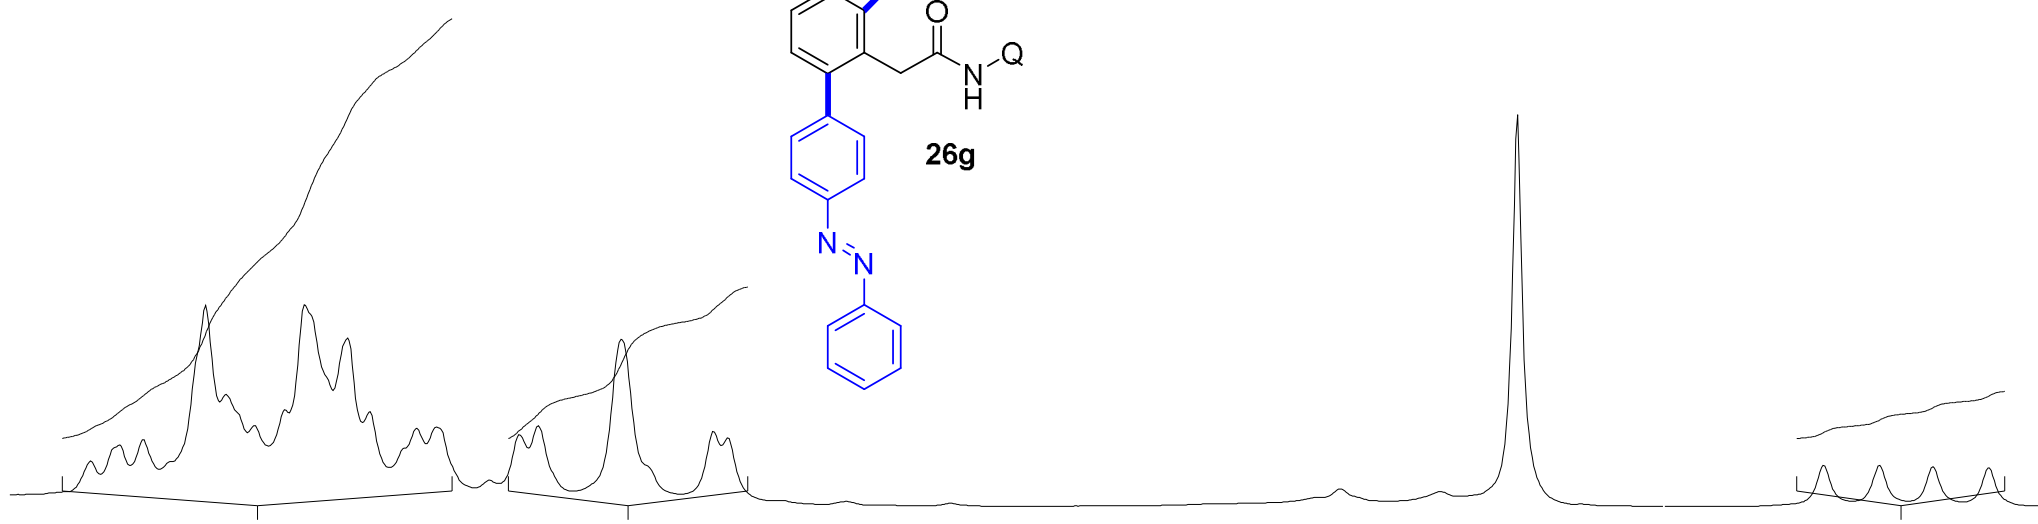

8.924

3.221

1.002

PPM 7.52 7.48 7.44 7.40 7.36 7.32 7.28 7.24 7.20

SpinWorks 4: SS 773 II A  
C13CPD CDCl3 /opt/topspin3.5pl2/nmrdata nmrsu 50

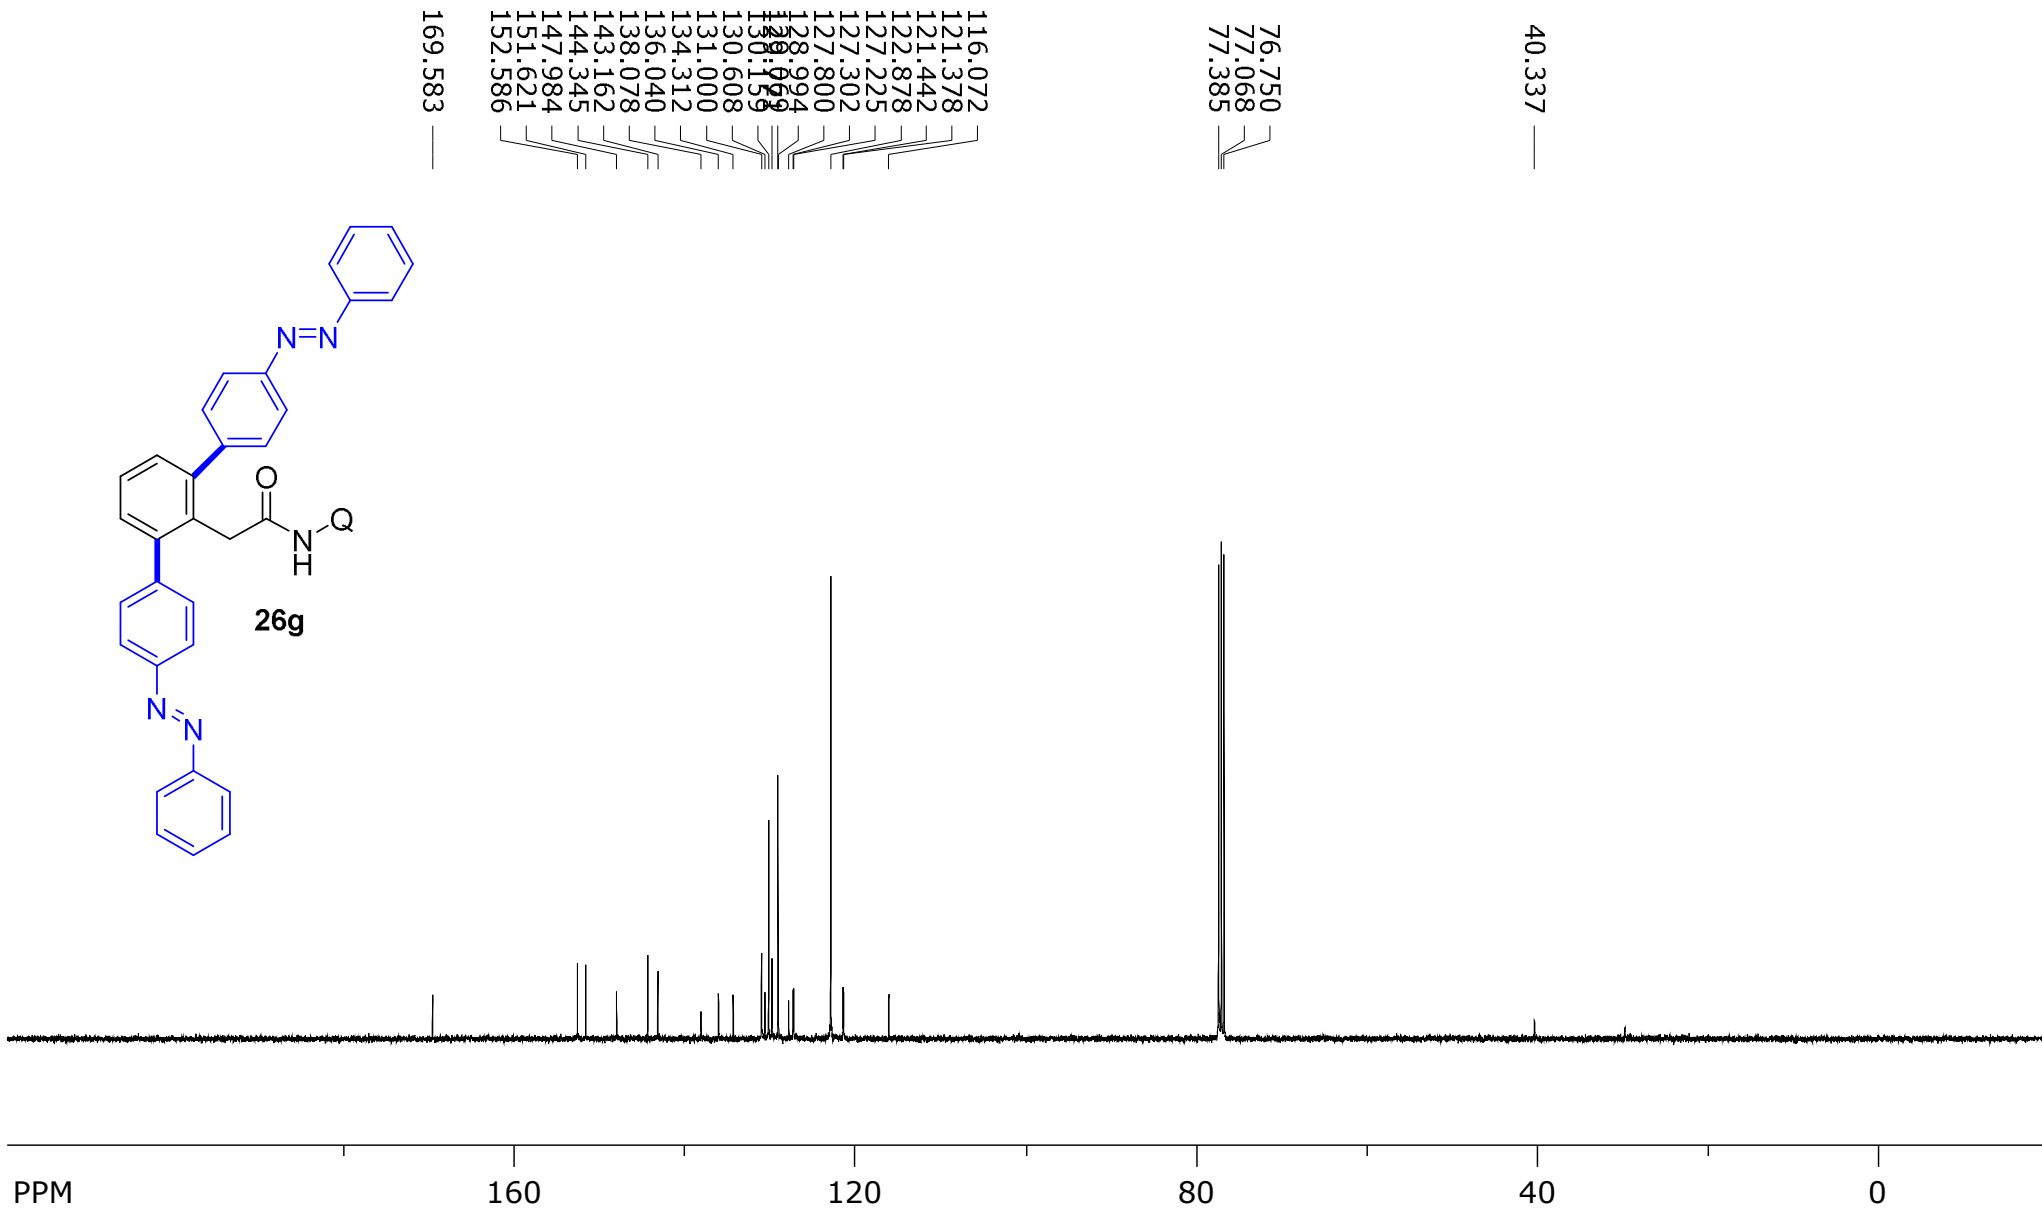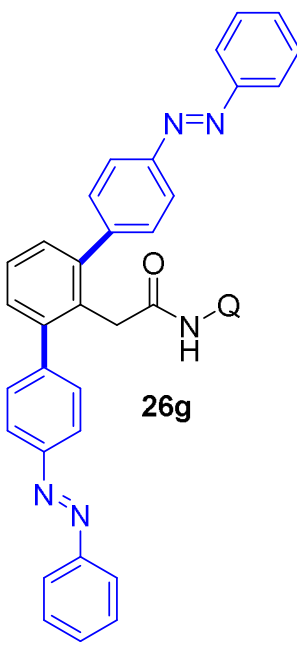

SpinWorks 4: SS 773 II A  
C13CPD CDCl3 /opt/topspin3.5pl2/nmrdata nmrsu 50



169.583

151.621  
152.586

147.984

143.162  
144.345

138.078

136.040

134.312

131.000

130.608

130.159

129.771

129.069

128.994

127.800

127.302

127.225

122.878

121.442

121.378

116.072

PPM

170

160

150

140

130

120

110

SpinWorks 4: SS 782 REP  
 PROTON CDCl3 /opt/topspin3.5pl2/nmrdata nmrsu 3

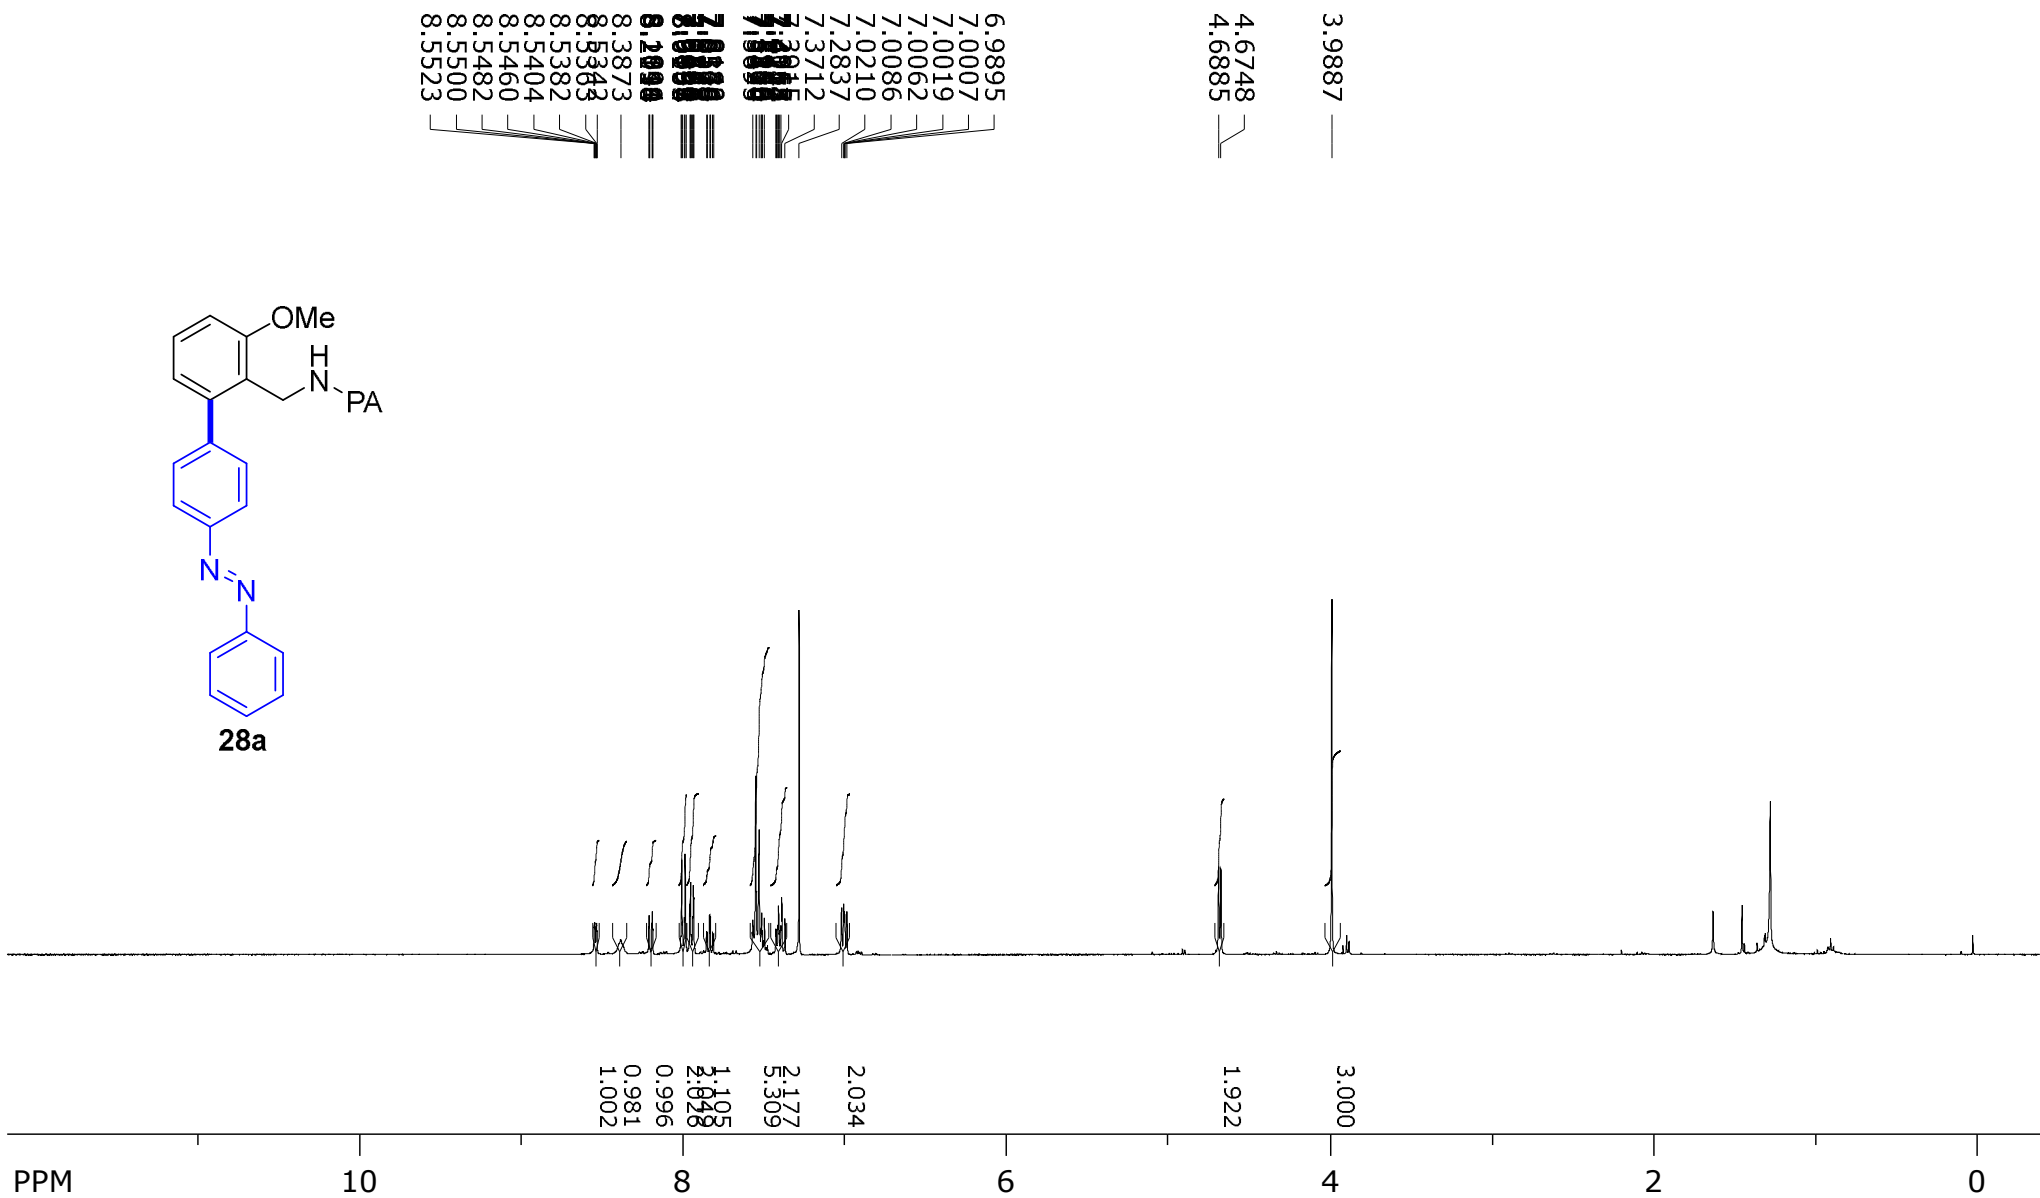

SpinWorks 4: SS 782 REP  
PROTON CDCl3 /opt/topspin3.5pl2/nmrdata nmrsu 3

8.5342  
8.5363  
8.5382  
8.5404  
8.5460  
8.5482  
8.5500  
8.5523

8.3873

8.1894  
8.1919  
8.1941  
8.2090  
8.2114  
8.2138

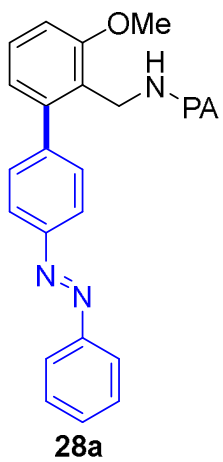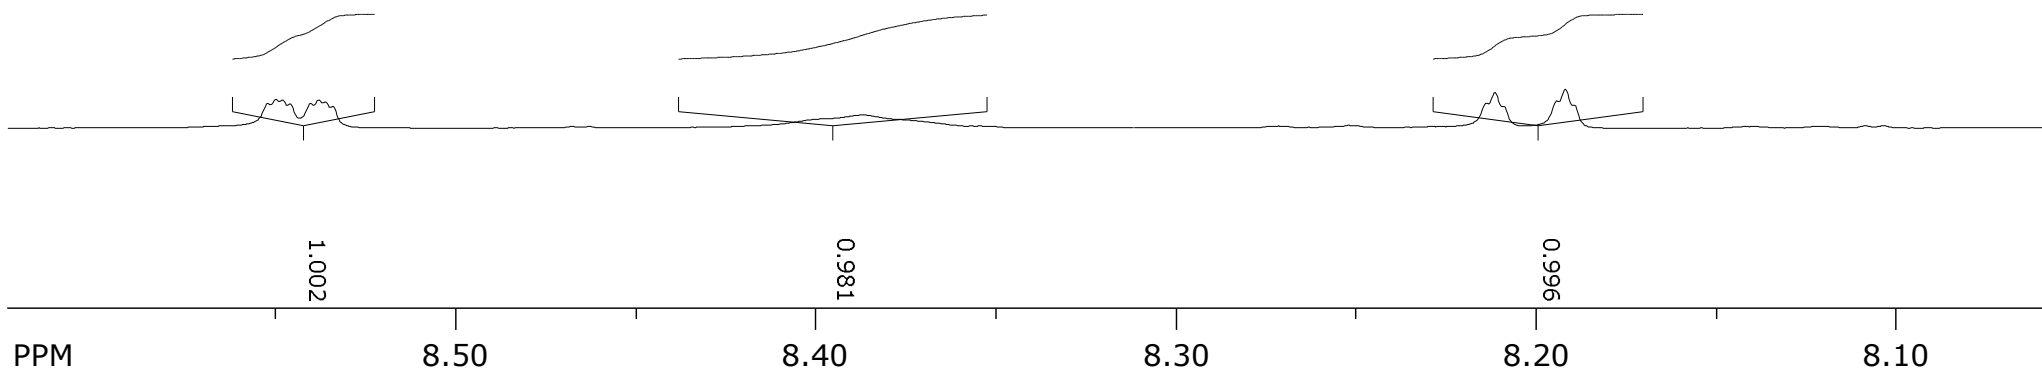



SpinWorks 4: SS 782 REP  
PROTON CDCl3 /opt/topspin3.5pl2/nmrdata nmrsu 3

7.9840  
7.9891  
7.9937  
8.0056  
8.0103  
8.0154

7.9505  
7.9556  
7.9594  
7.9354  
7.9381  
7.9420

7.8525  
7.8568

7.8334  
7.8376

7.8140  
7.8183

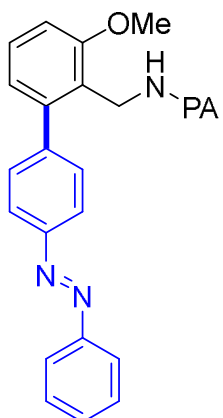

**28a**

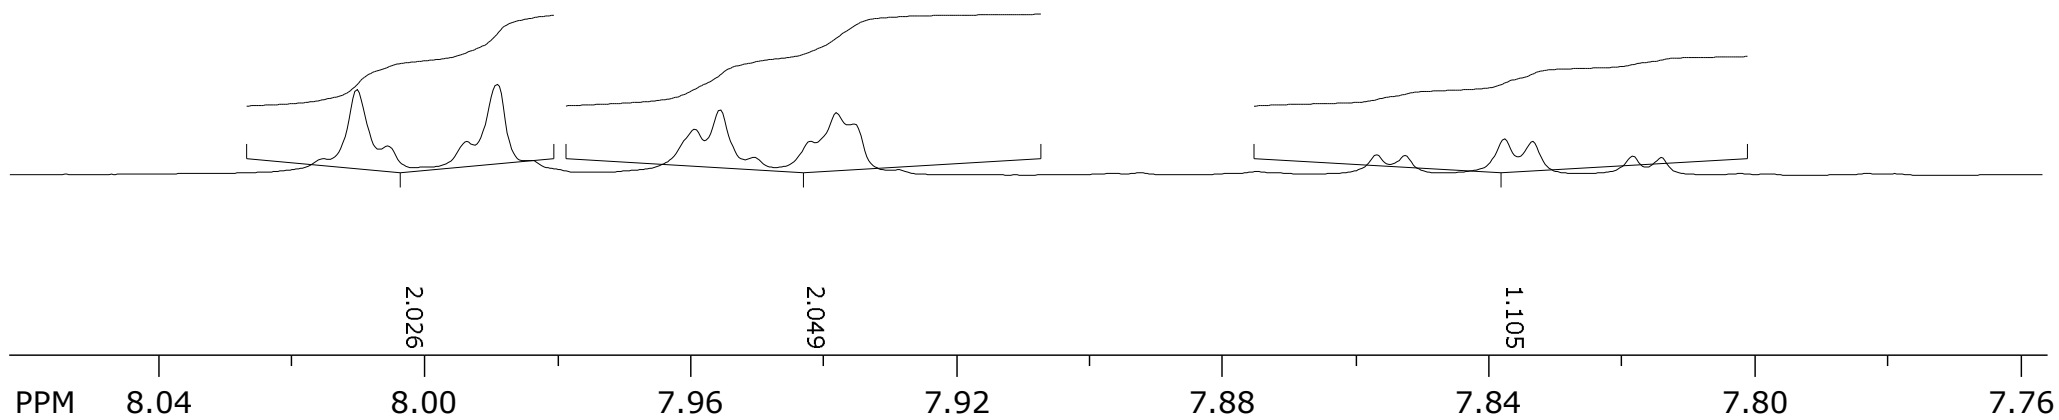

SpinWorks 4: SS 782 REP  
PROTON CDCl3 /opt/topspin3.5pl2/nmrdata nmrsu 3

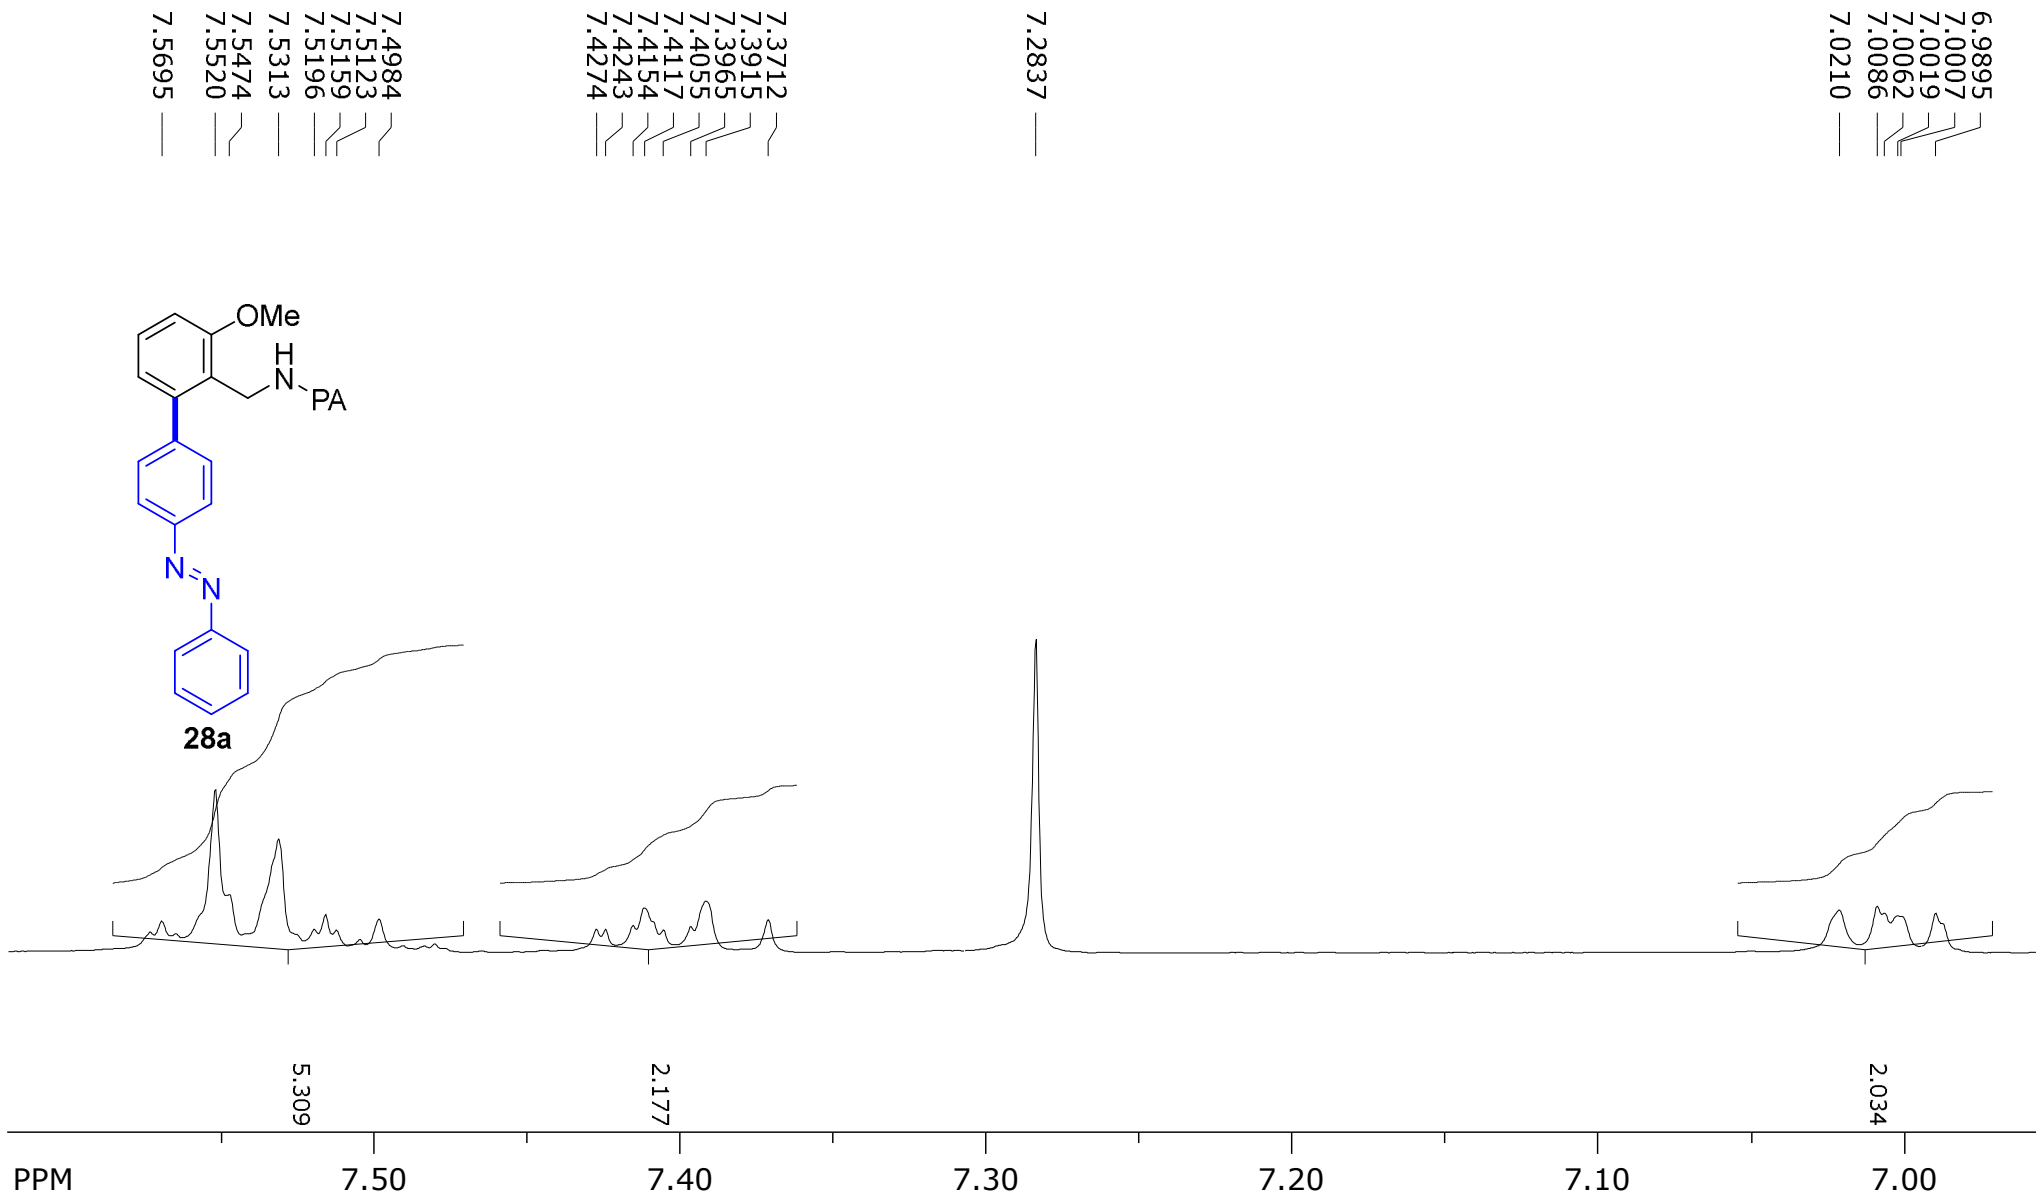

SpinWorks 4: SS 782 REP  
PROTON CDCl3 /opt/topspin3.5pl2/nmrdata nmrsu 3

4.6748  
4.6885

3.9887

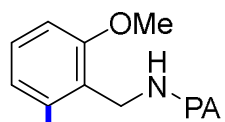

**28a**

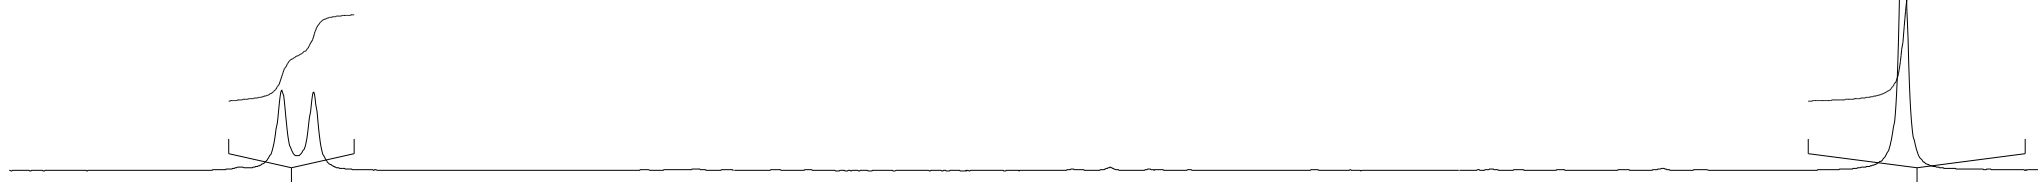

1.922

3.000

PPM

4.70

4.60

4.50

4.40

4.30

4.20

4.10

4.00

335

SpinWorks 4: ss 782 rep  
C13CPD CDCl3 /opt/topspin3.5pl2/nmrdata nmrsu 1

109.965  
122.281  
122.561  
122.867  
123.660  
125.905  
128.612  
129.100  
130.115  
130.924  
137.215  
143.194  
143.375  
148.035  
150.280  
151.704  
152.767  
158.791  
163.433

76.722  
77.040  
77.358

29.727  
36.837

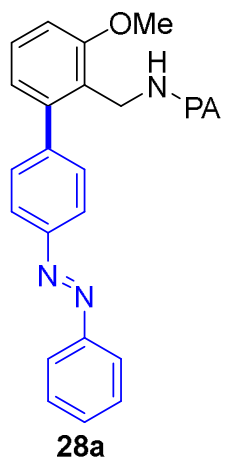

PPM

160

120

80

40

0

SpinWorks 3: ss 782 rep

143.1937  
143.3747  
148.0348  
150.2803  
151.7039  
152.7672  
158.7909  
163.4334  
109.9646  
122.2806  
122.5613  
122.8674  
123.6596  
125.9054  
128.6120  
129.0998  
130.1150  
130.9243  
137.2147  
76.7223  
77.0399  
77.3576  
55.8777  
29.7265  
36.8374

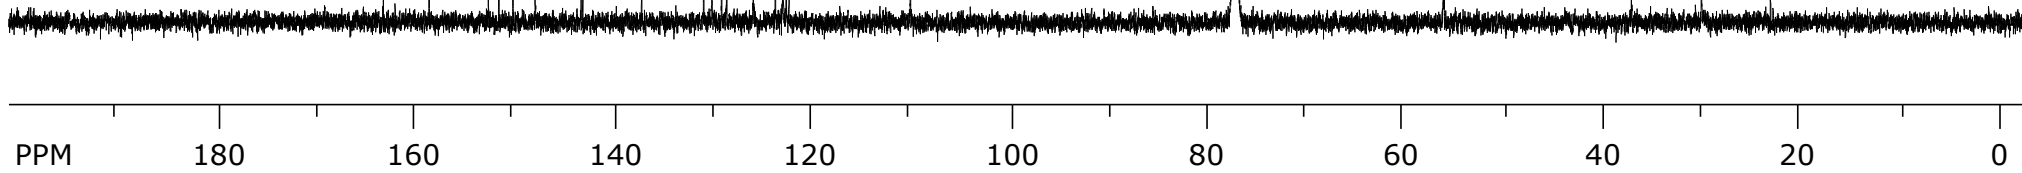

SpinWorks 3: ss 782 rep

163.4334 —  
158.7909 —  
152.7672 —  
151.7039 —  
150.2803 —  
148.0348 —  
143.1937 —  
143.3747 —  
137.2147 —  
130.9243 —  
129.0998 —  
128.6120 —  
125.9054 —  
123.6596 —  
122.8674 —  
122.5613 —  
122.2806 —  
109.9646 —

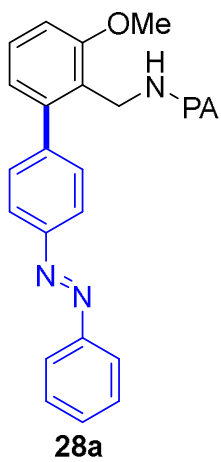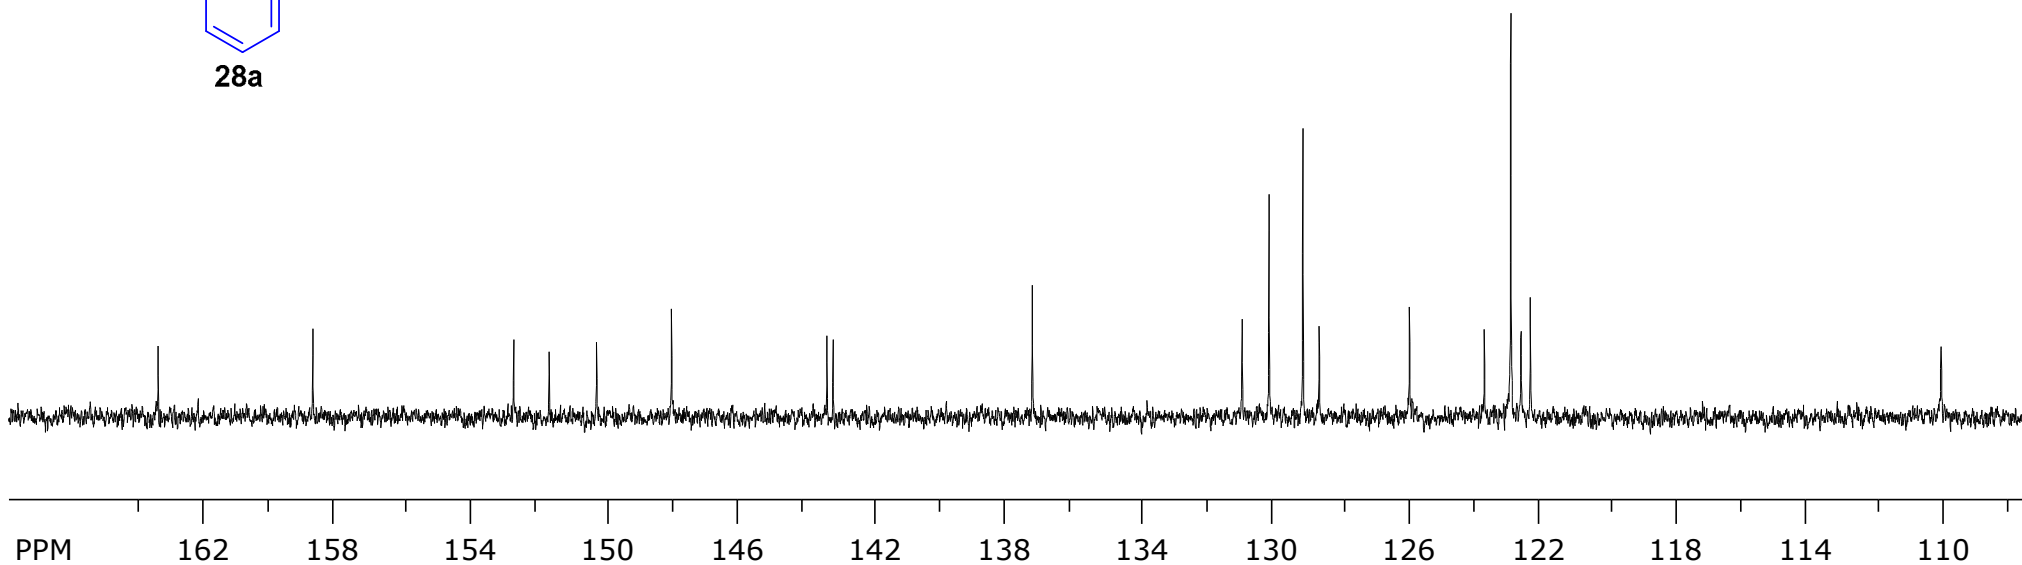



SpinWorks 4: SS-295-REP4  
PROTON CDCl3 /opt/topspin3.5pl2/nmrdata nmrsu 18

8.5343  
8.5365  
8.5382  
8.5403  
8.5462  
8.5483  
8.5500

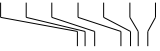

8.1782  
8.1803  
8.1977  
8.2347  
8.2510  
8.2650

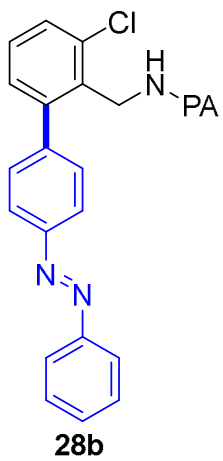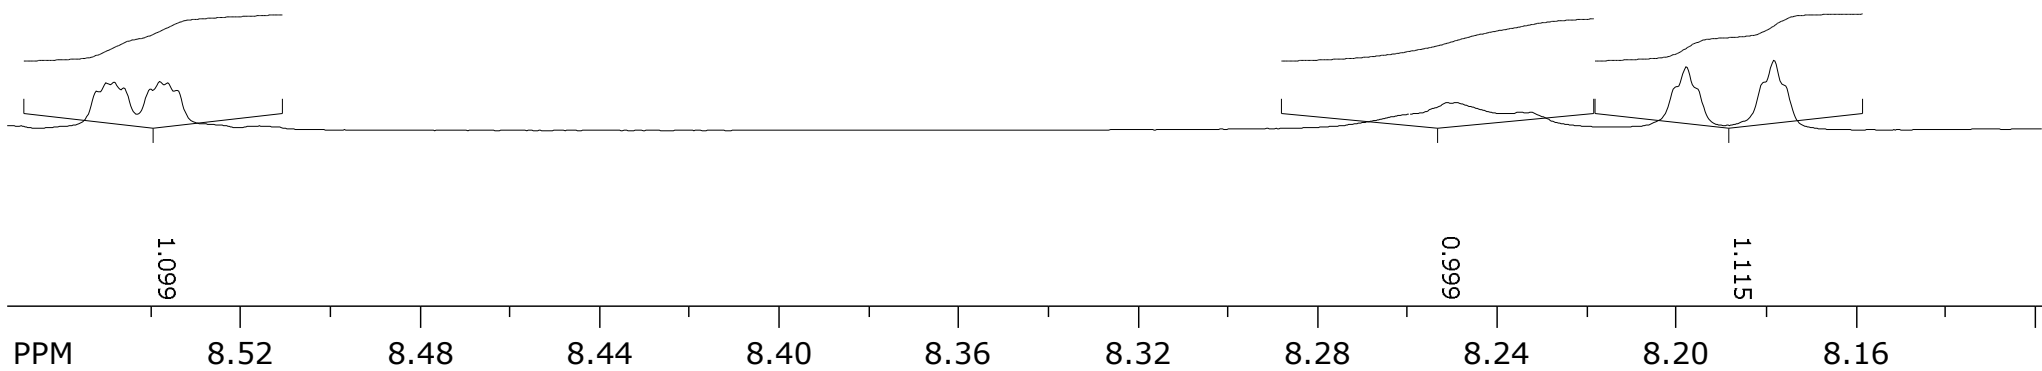



SpinWorks 4: SS-295-REP4  
PROTON CDCl3 /opt/topspin3.5pl2/nmrdata nmrsu 18

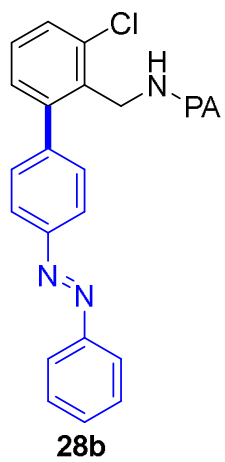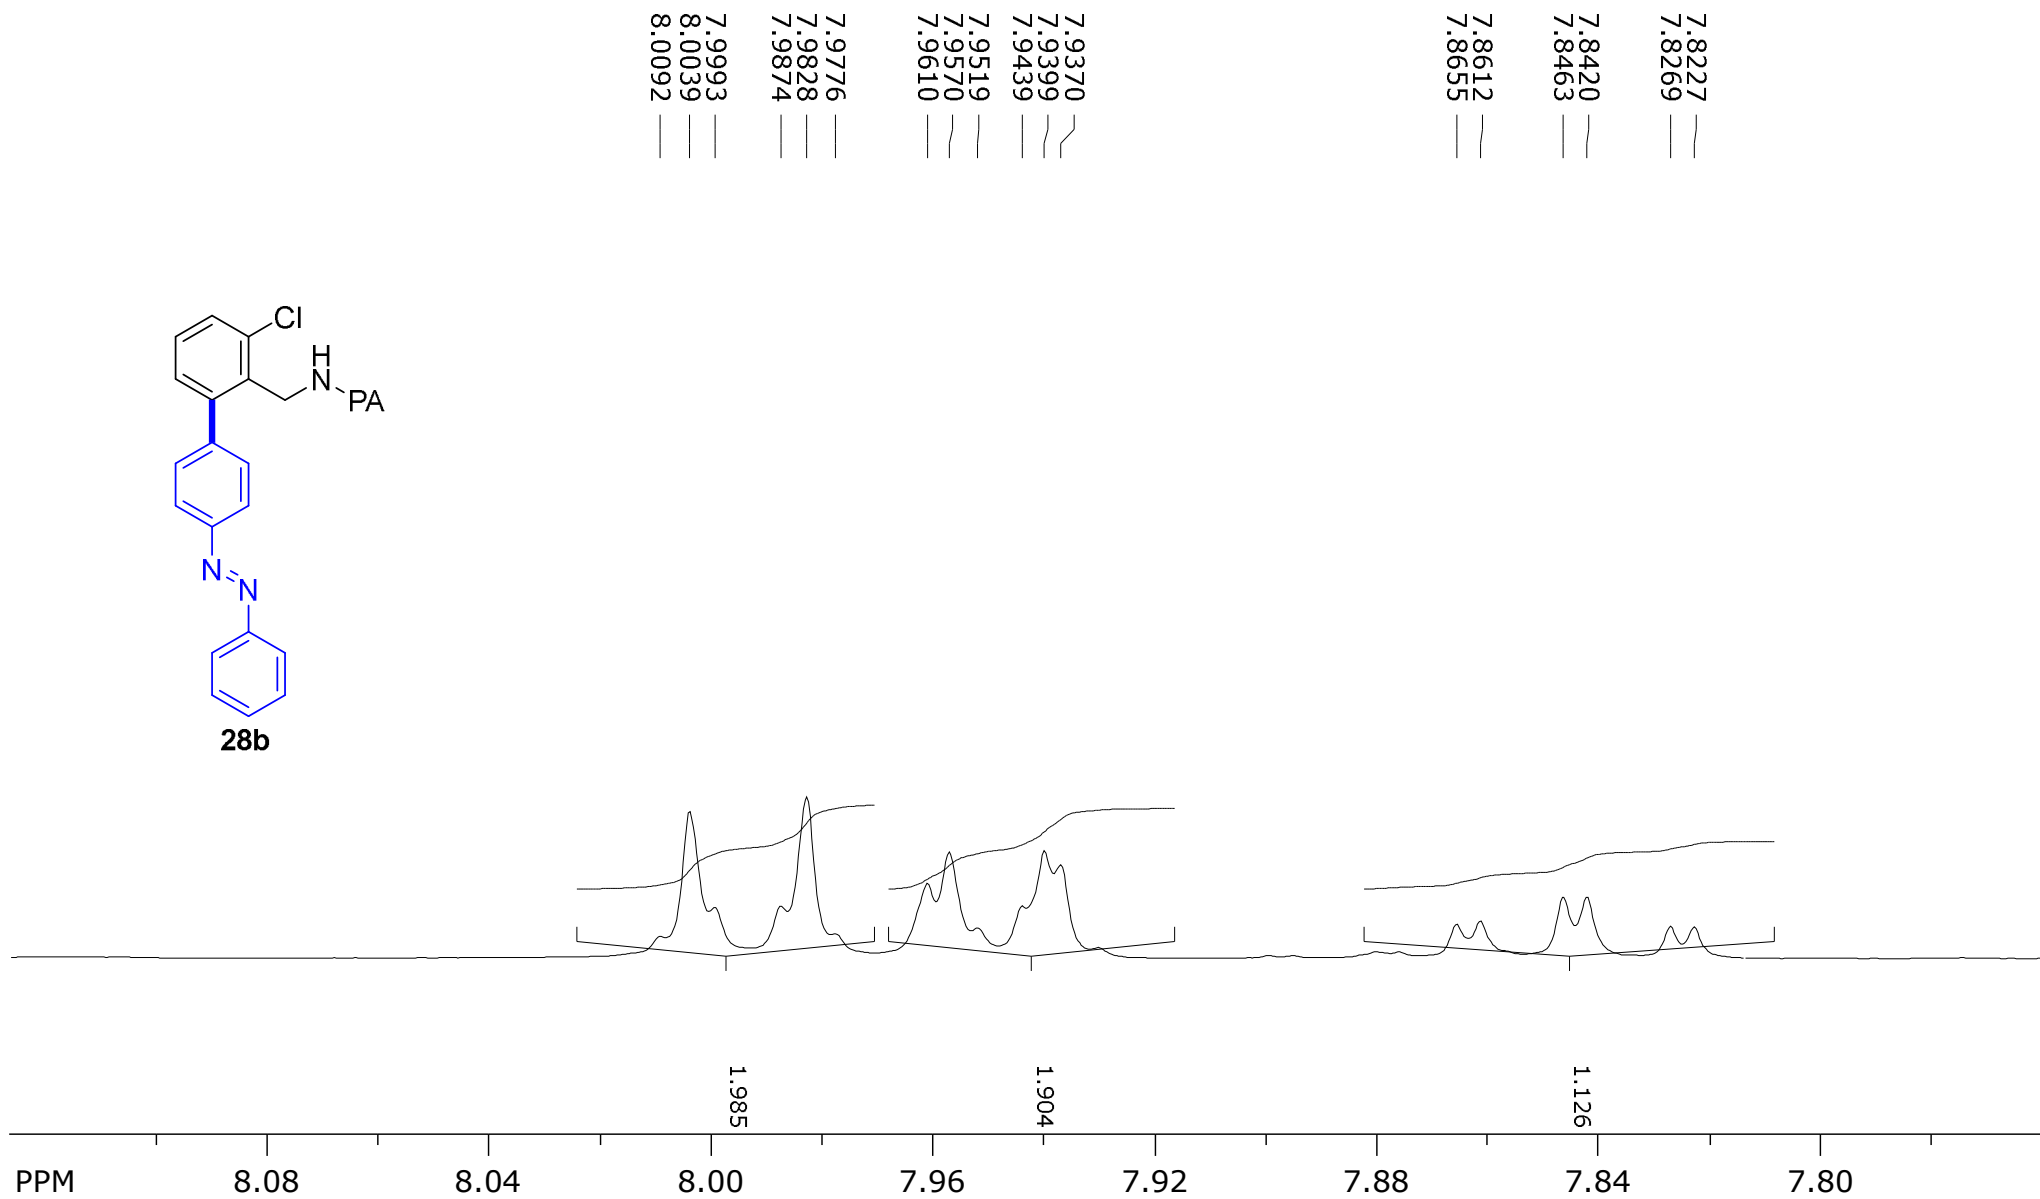

SpinWorks 4: SS-295-REP4  
PROTON CDCl3 /opt/topspin3.5pl2/nmrdata nmrsu 18

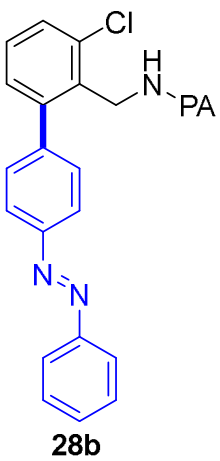

7.5766  
7.5722  
7.5676  
7.5552  
7.5519  
7.5498  
7.5400  
7.5365  
7.5243  
7.5201  
7.5136  
7.4999  
7.5034  
7.4888  
7.4457  
7.4426  
7.4337  
7.4307  
7.4267  
7.4237  
7.4148  
7.4118  
7.3885  
7.3691  
7.3495

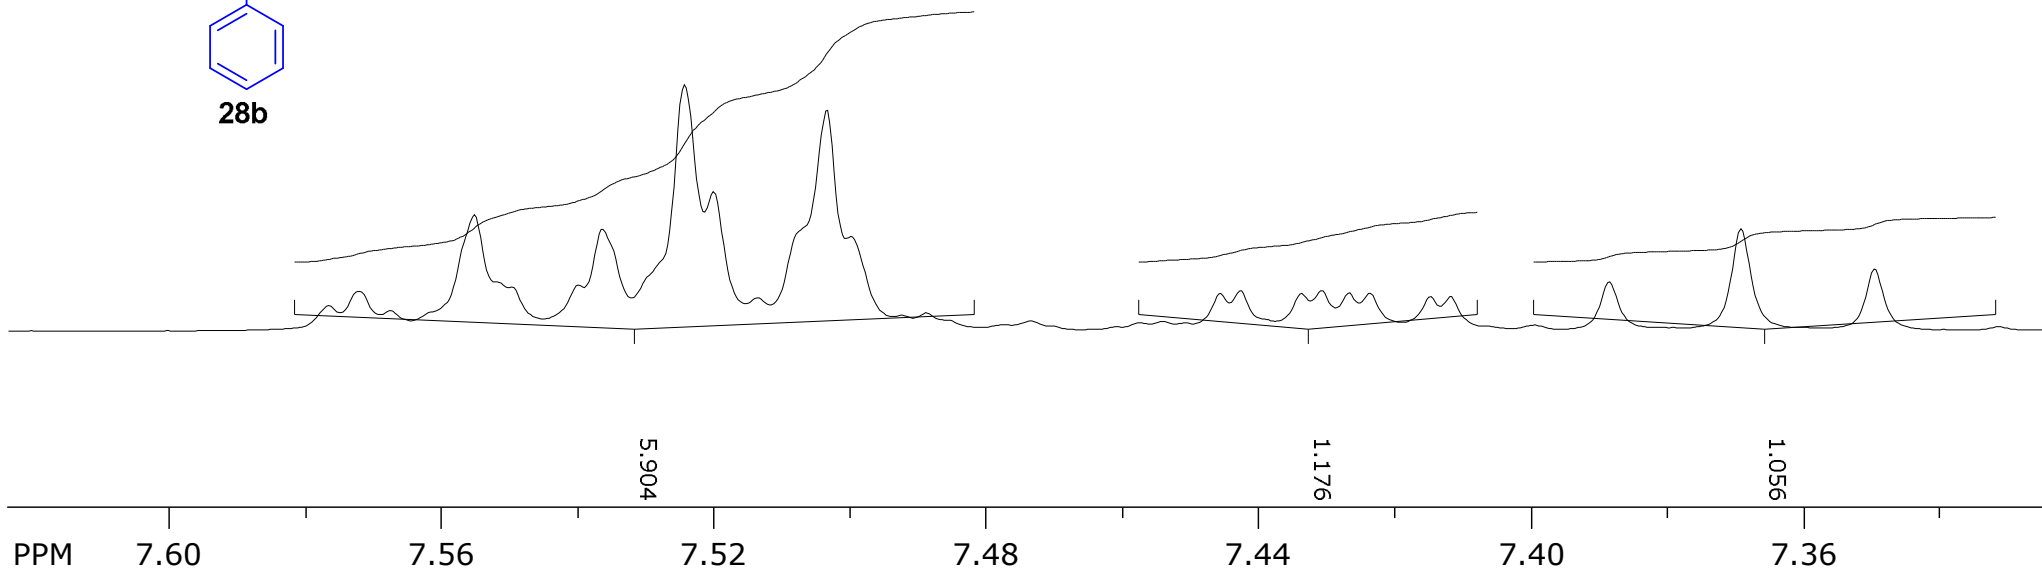

SpinWorks 4: SS-295-REP4  
PROTON CDCl3 /opt/topspin3.5pl2/nmrdata nmrsu 18

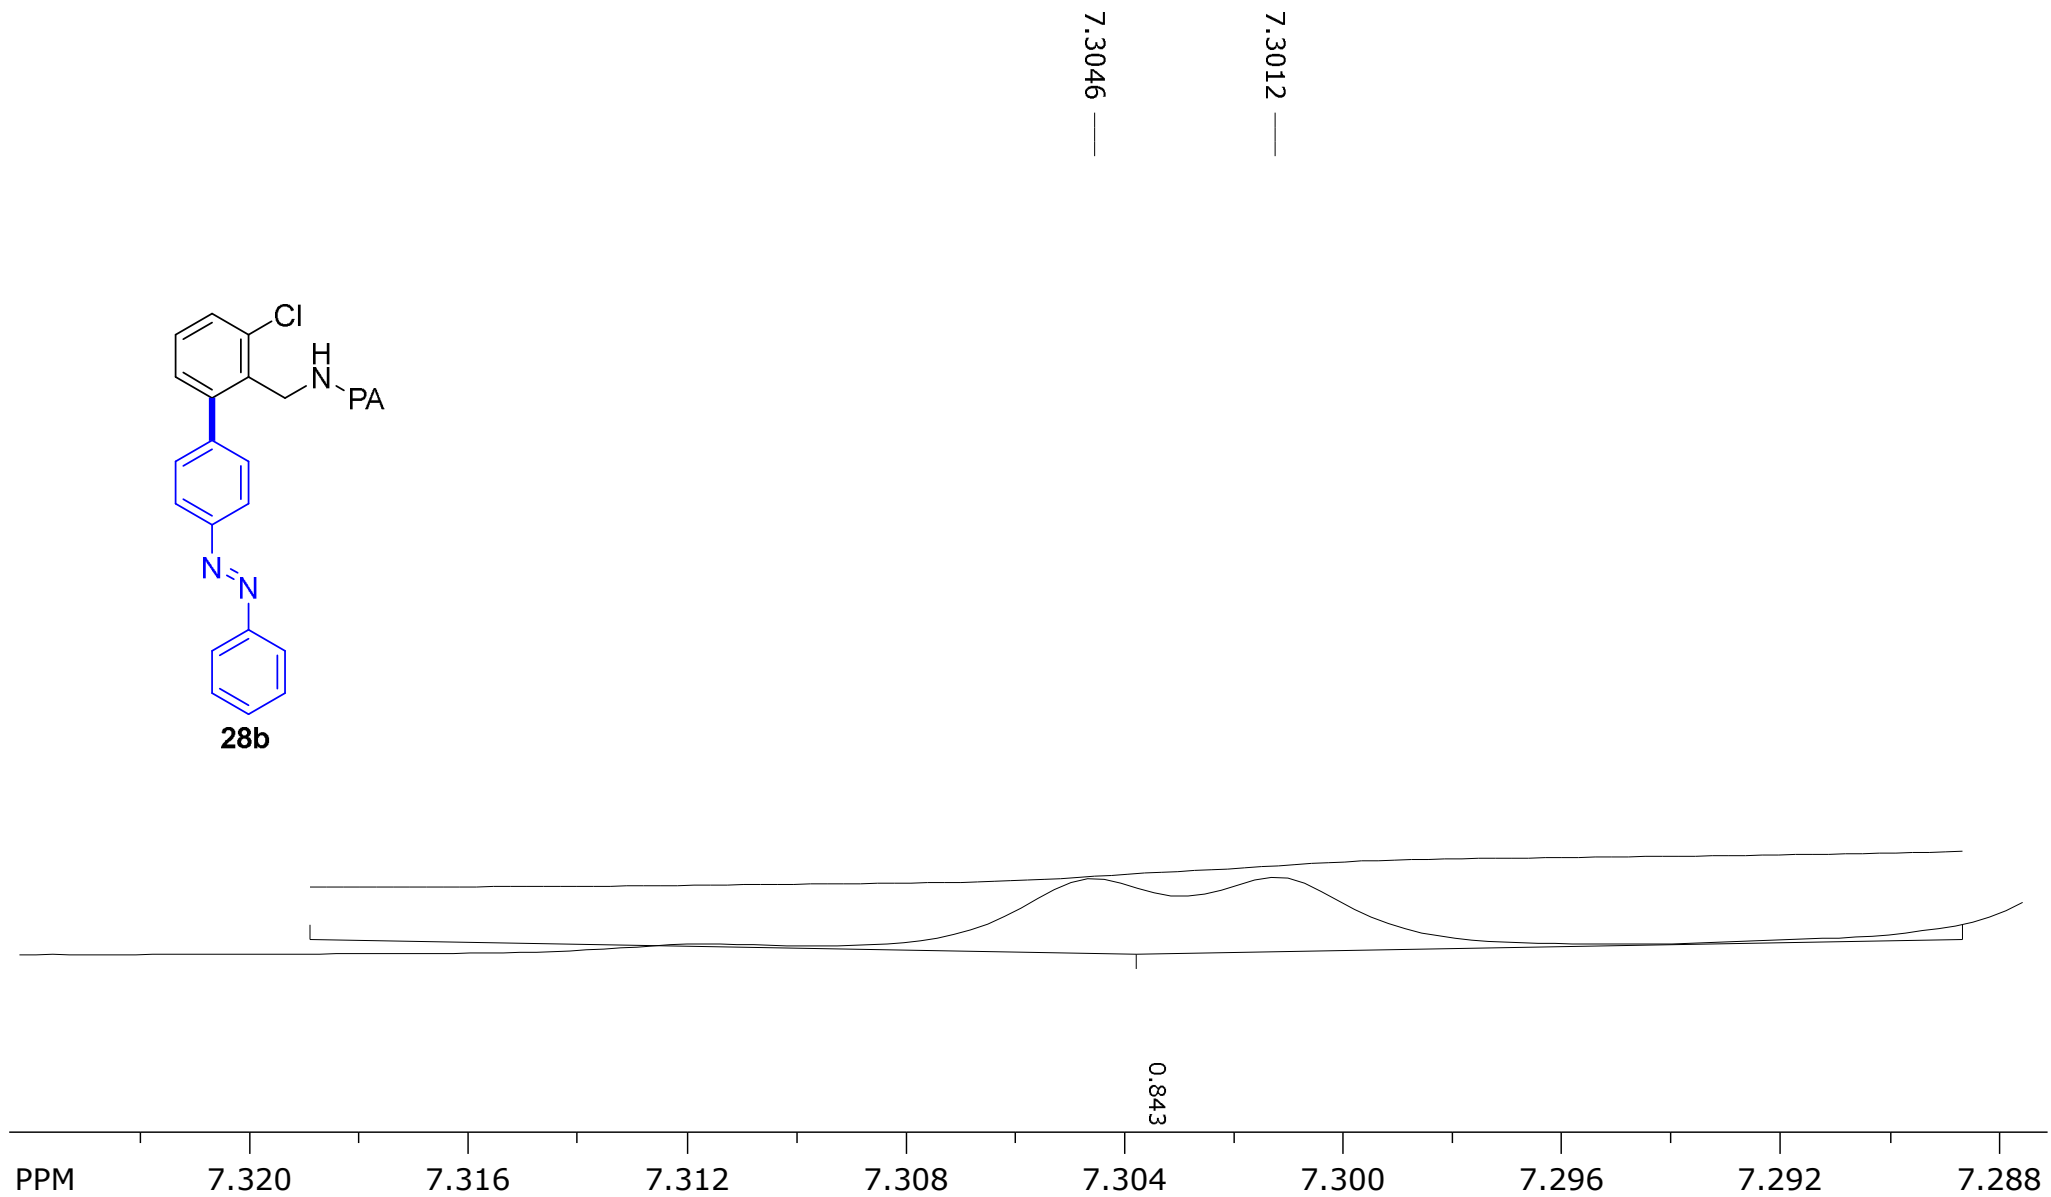

SpinWorks 4: SS-295-R4  
C13CPD CDCl3 /opt/topspin3.5pl2/nmrdata nmrsu 8

122.291  
122.917  
122.917  
122.967  
126.156  
128.876  
128.966  
129.132  
129.426  
129.926  
131.108  
132.919  
136.085  
137.311  
142.771  
144.376  
148.094  
149.756  
151.914  
152.693  
163.556

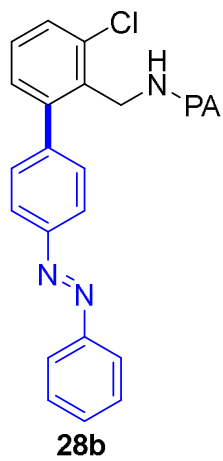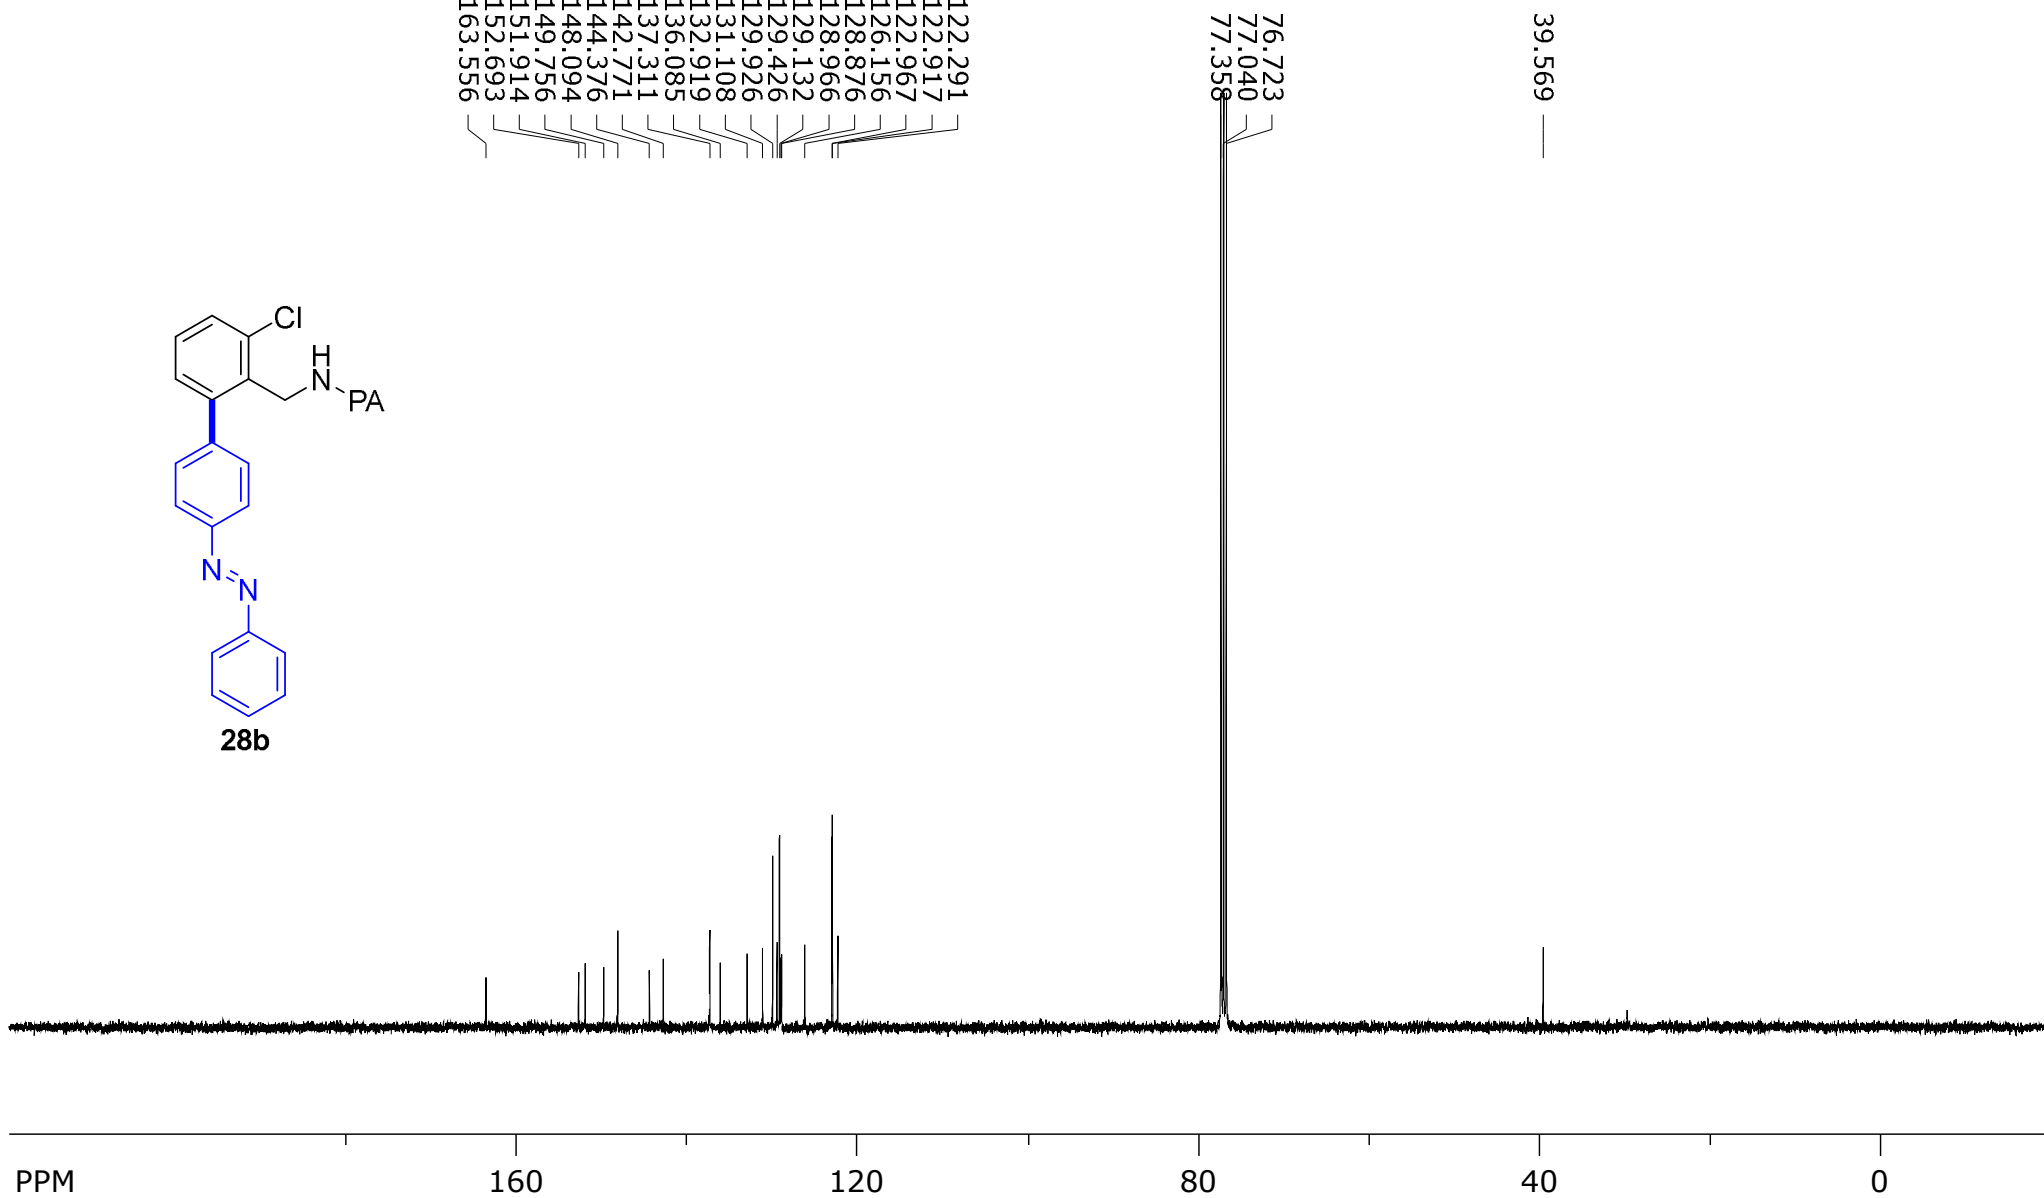



SpinWorks 4: SS 285 P  
PROTON CDCl3 /opt/topspin3.5pl2/nmrdata nmrsu 48

8.5577 —  
8.5462 —  
8.4671 —  
8.4560 —  
8.4386 —  
8.4208 —  
8.4097 —  
8.2697 —  
8.2502 —

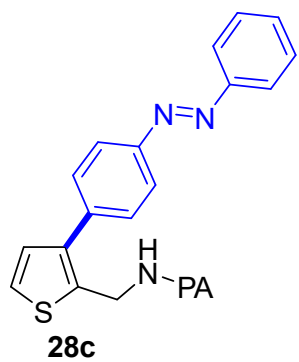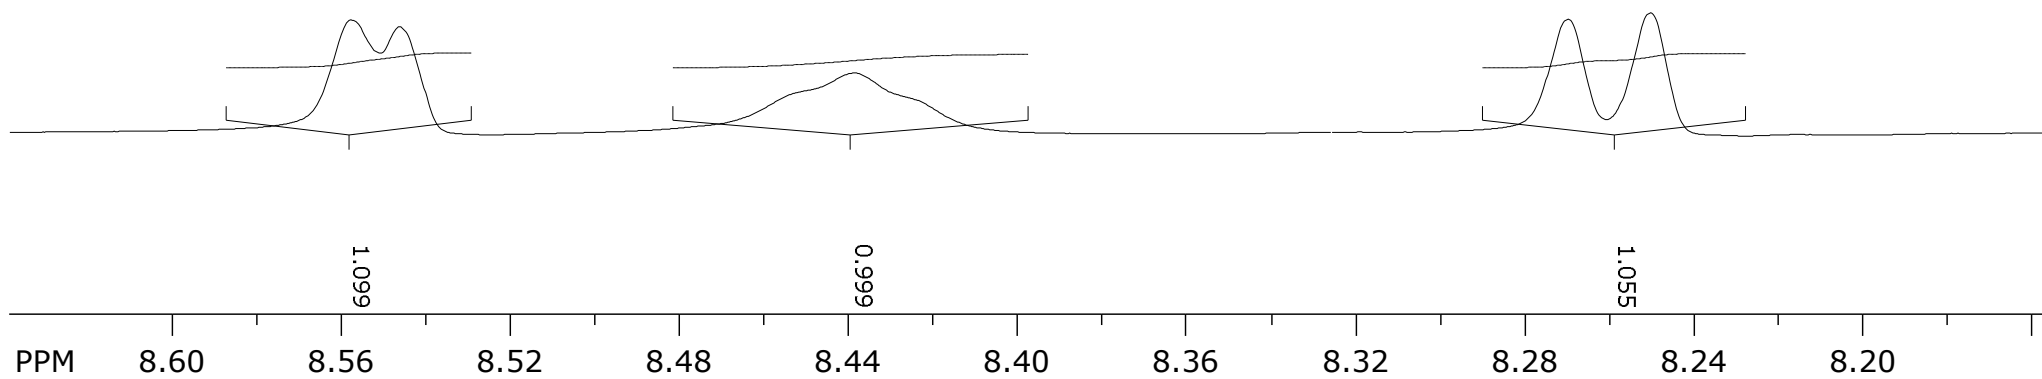

SpinWorks 4: SS 285 P  
PROTON CDCl3 /opt/topspin3.5pl2/nmrdata nmrsu 48

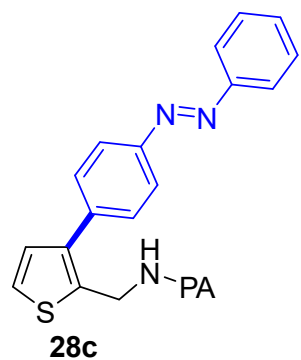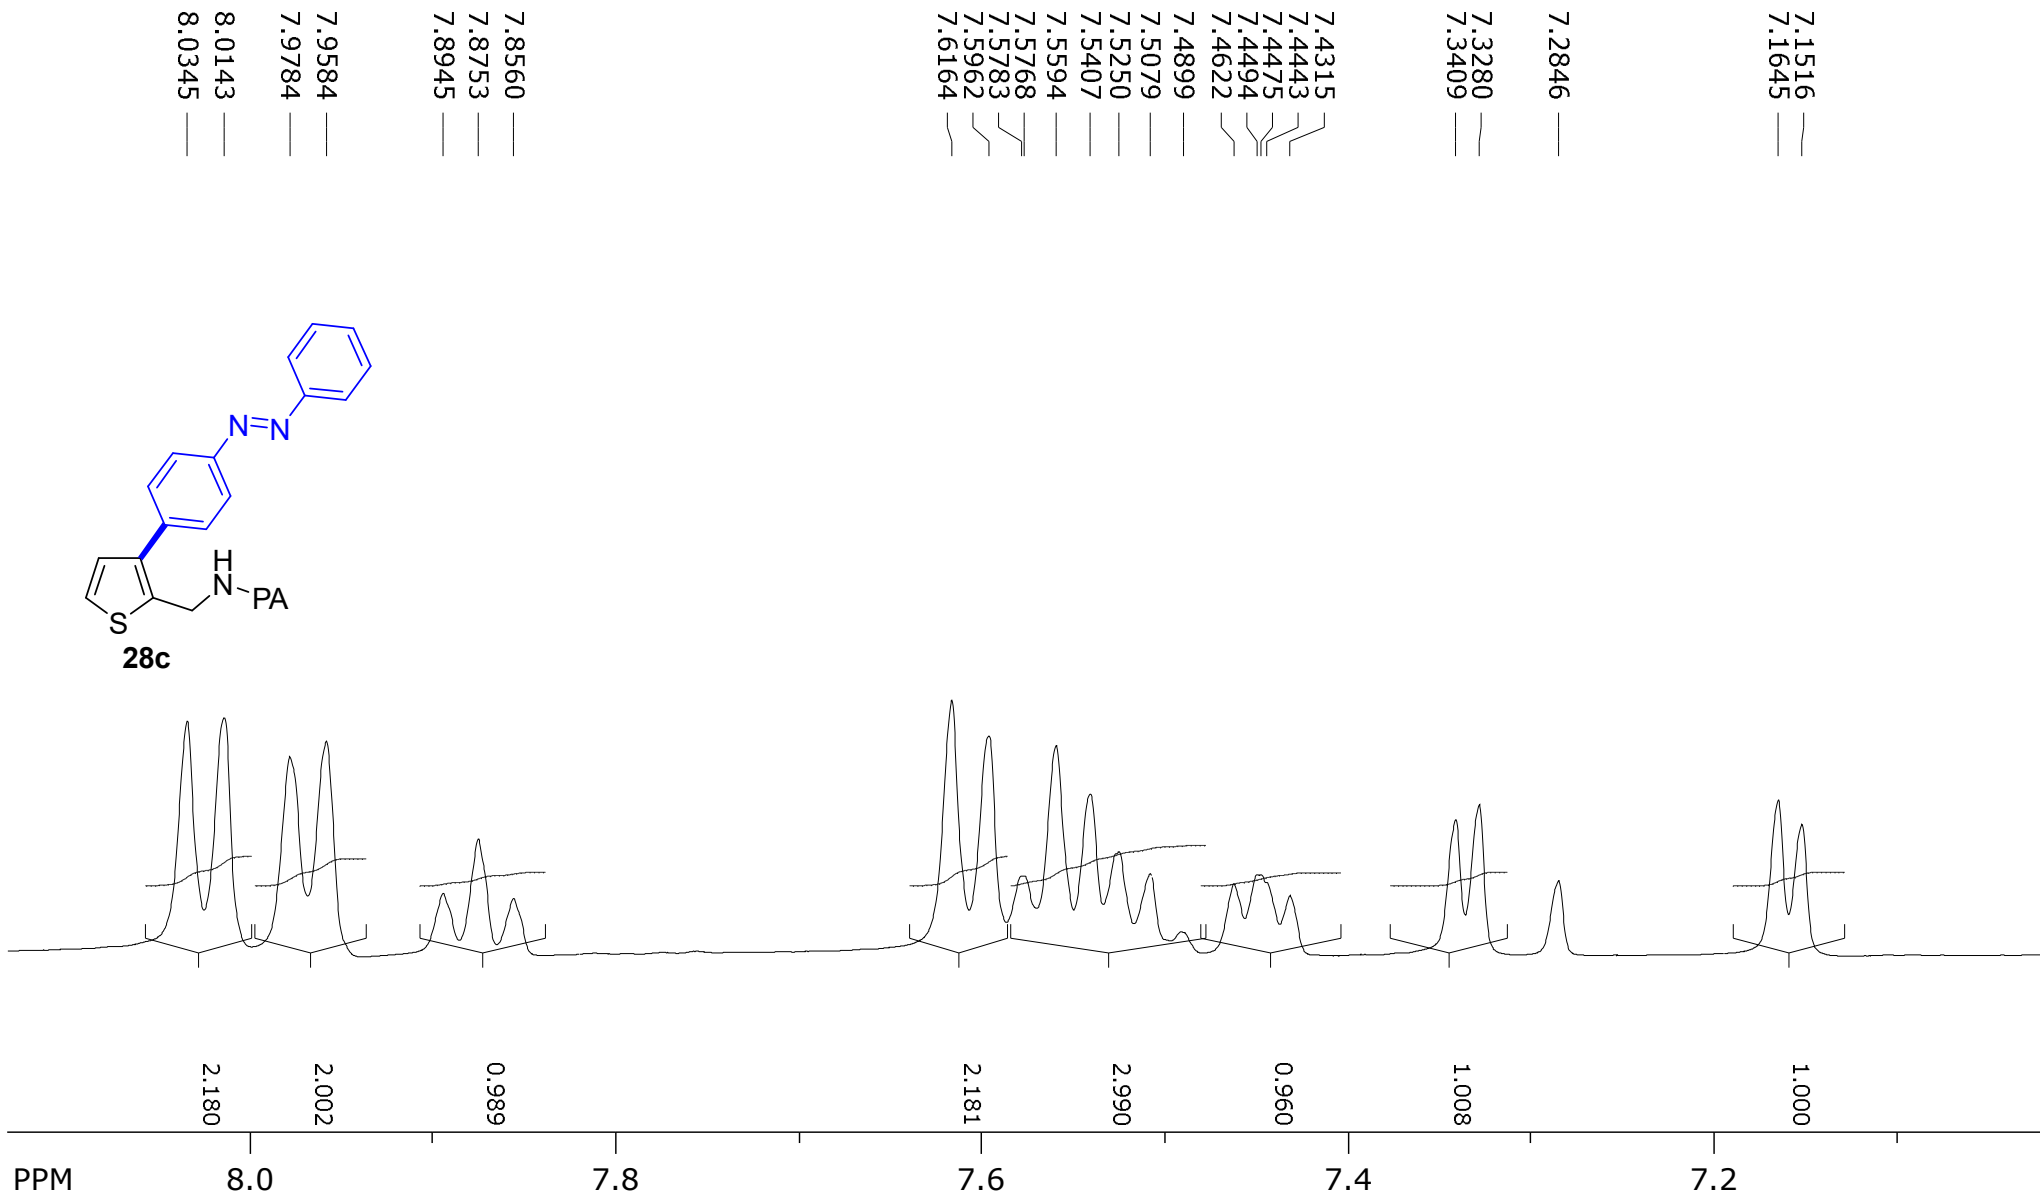

SpinWorks 4: SS 285 P  
PROTON CDCl3 /opt/topspin3.5pl2/nmrdata nmrsu 48

4.9446  
4.9591

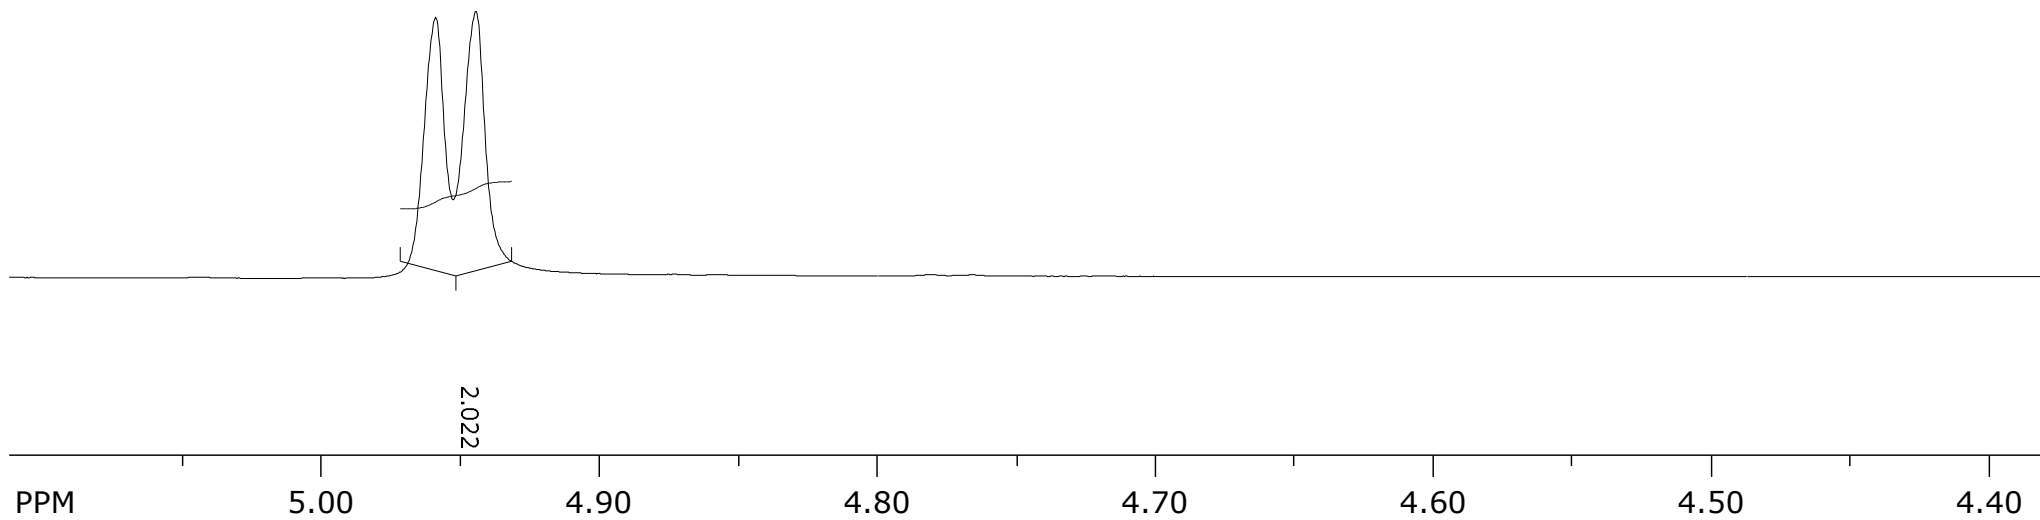



SpinWorks 4: SS 285 P  
C13CPD CDCl3 /opt/topspin3.5pl2/nmrdata nmrsu 48

122.427  
122.925  
123.247  
124.468  
126.390  
129.127  
129.152  
129.522  
131.098  
136.553  
137.419  
138.649  
139.585  
148.179  
149.508  
151.593  
152.699  
164.120

76.760  
77.077  
77.395

37.197

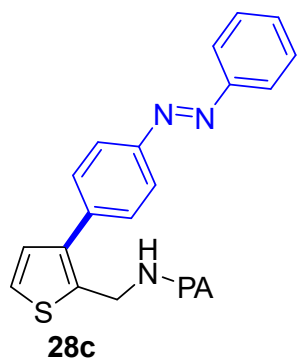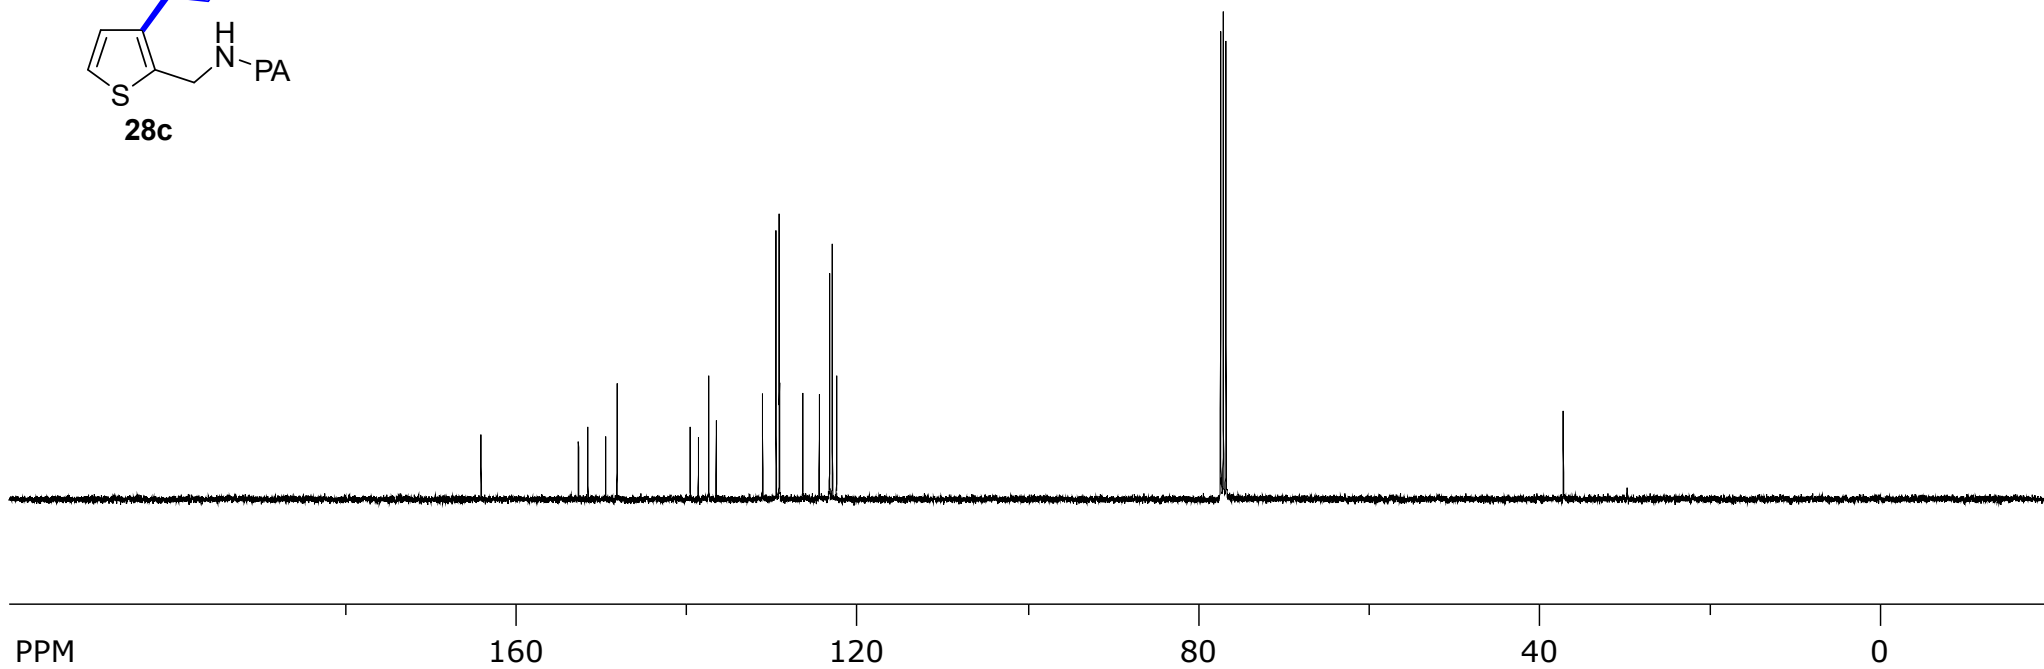



SpinWorks 4: SS 286 P  
PROTON CDCl3 /opt/topspin3.5pl2/nmrdata nmrsu 52

8.4364  
8.4475

7.86664  
7.8885  
7.9071  
7.9399  
7.9577  
7.9761

7.7088  
7.7281  
7.7473

7.4884  
7.5069  
7.5250  
7.5391  
7.5576  
7.5766  
7.5891  
7.6087

7.3427  
7.3581  
7.3595  
7.3731  
7.4043  
7.4231  
7.2855

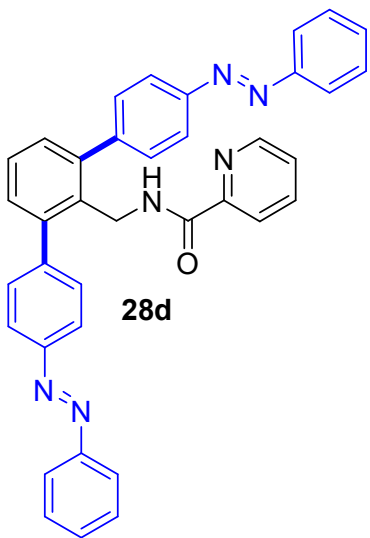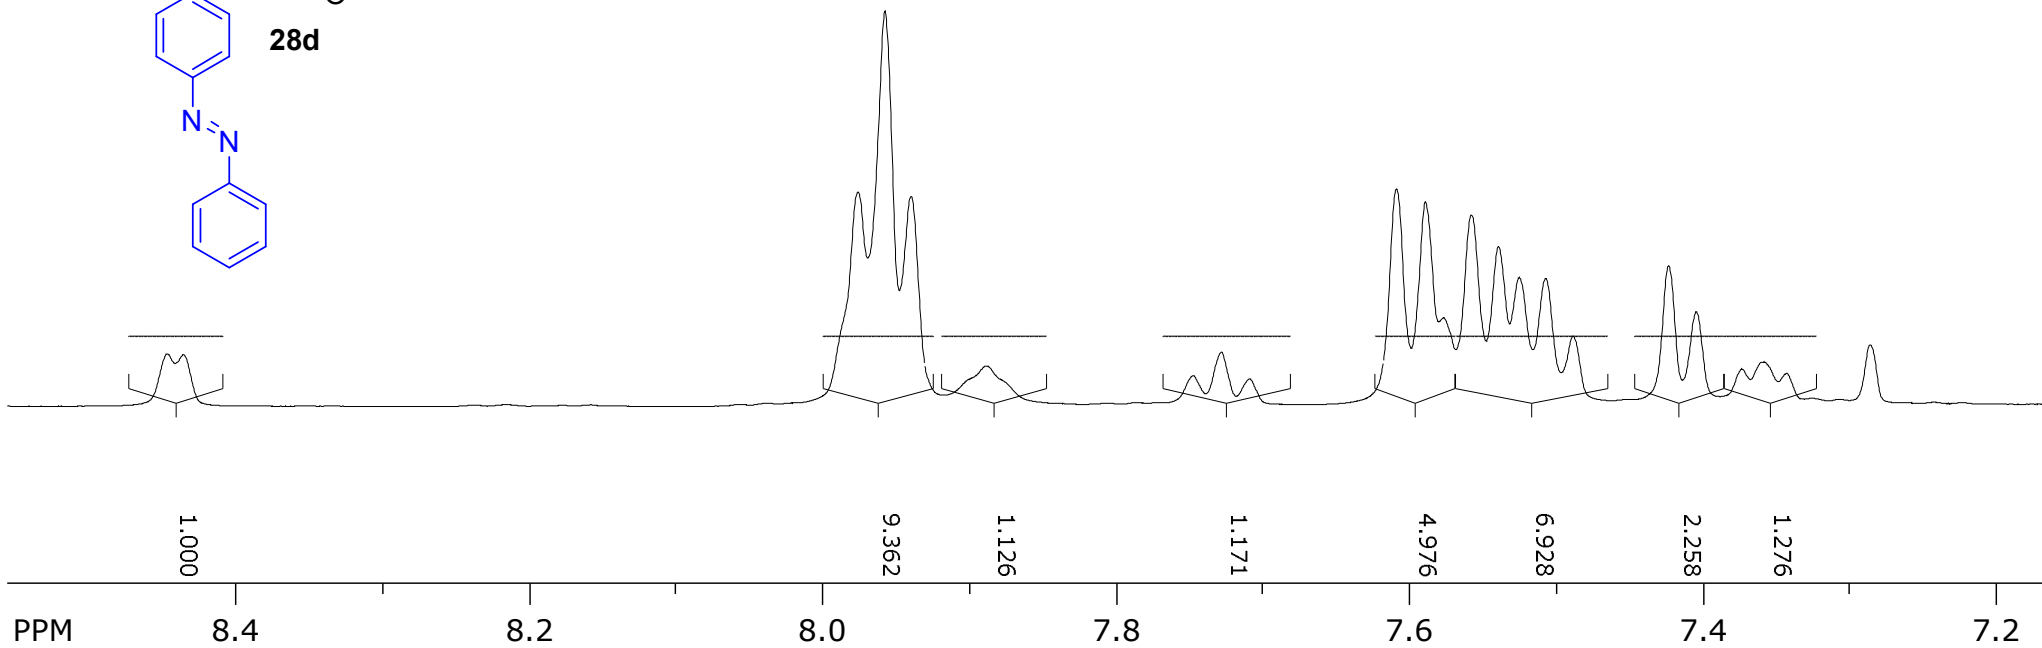

SpinWorks 4: SS 286 P  
C13CPD CDCl3 /opt/topspin3.5pl2/nmrdata nmrsu 52

122.029  
122.888  
122.917  
125.964  
127.651  
129.134  
129.896  
130.062  
131.045  
132.767  
137.133  
143.002  
143.910  
147.845  
149.518  
151.711  
152.711  
163.005

76.740  
77.058  
77.375

39.414

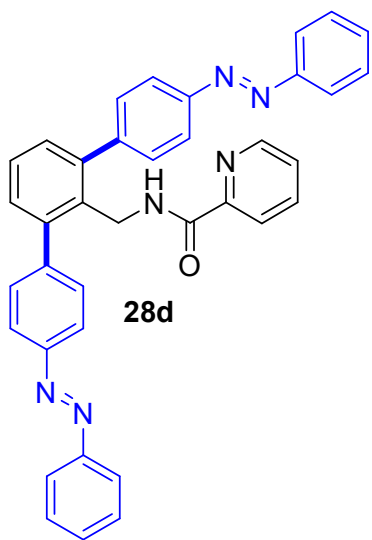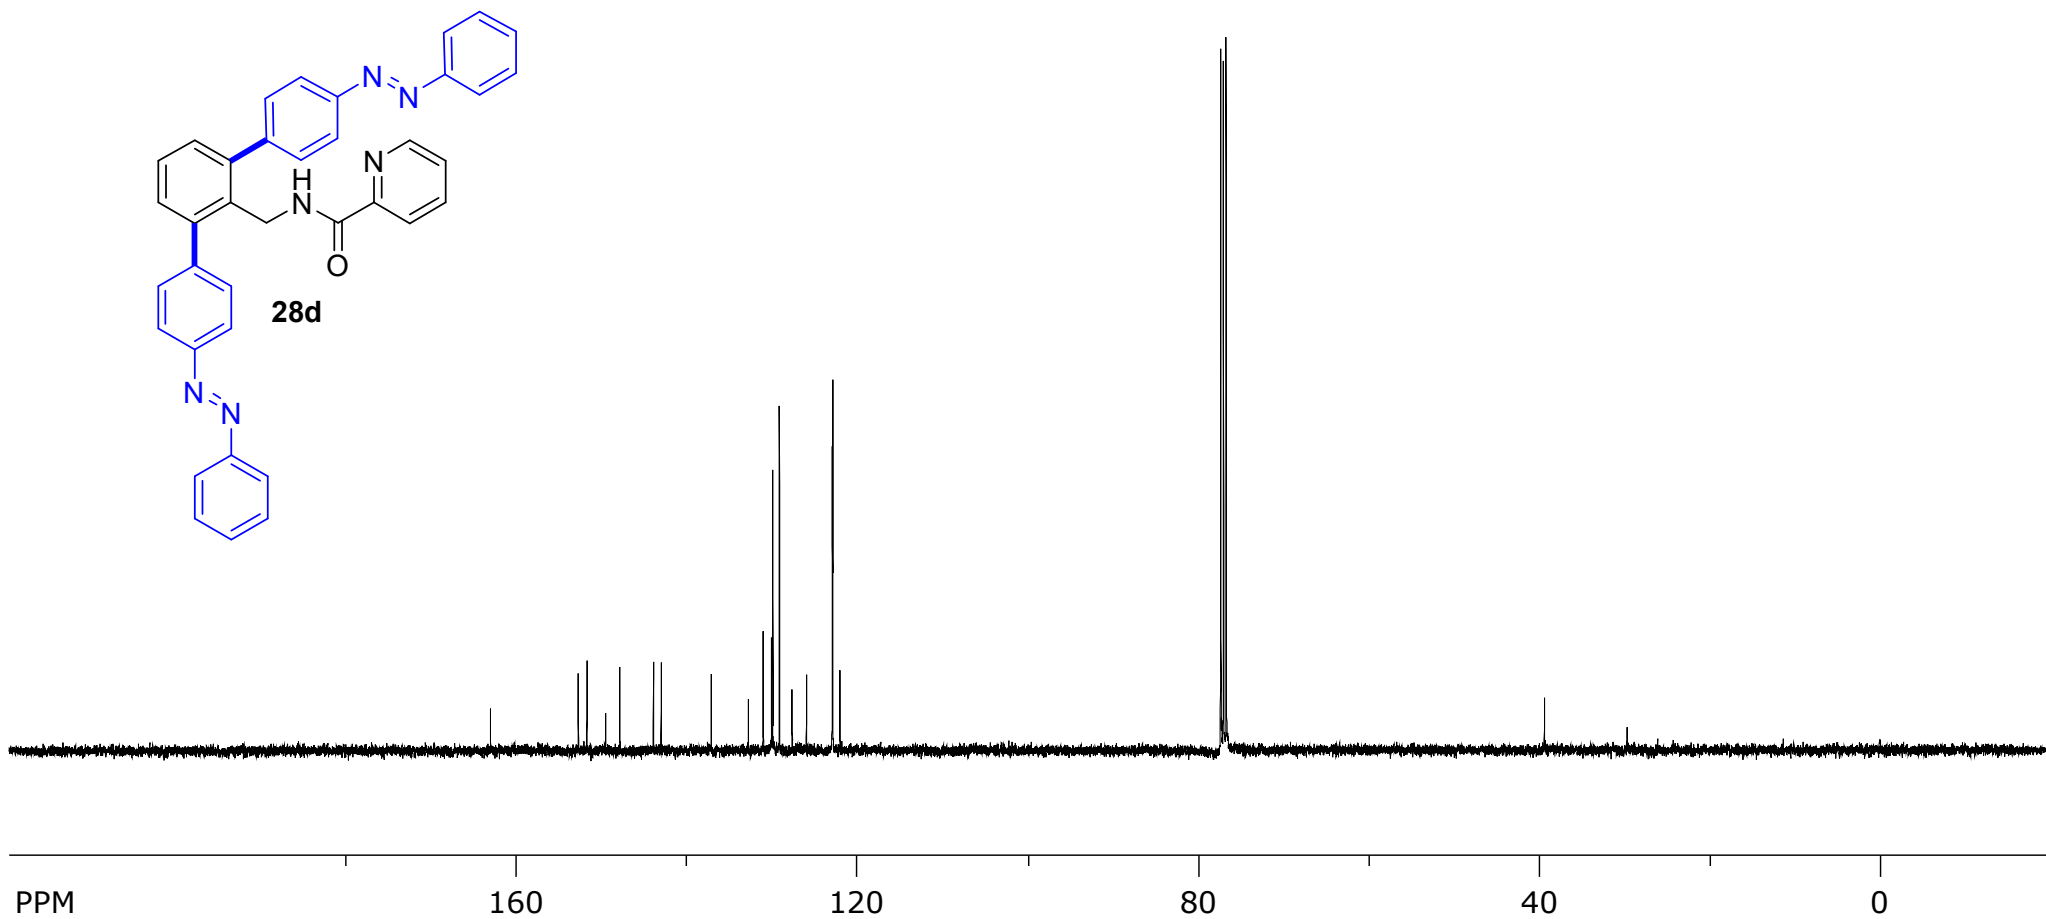

PPM

160

120

80

40

0

SpinWorks 4: S S 188  
PROTON CDCl3 /opt/topspin3.5pl2/nmrdata nmrsu 18

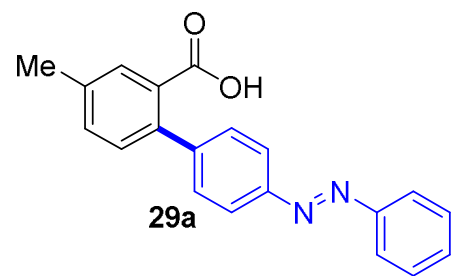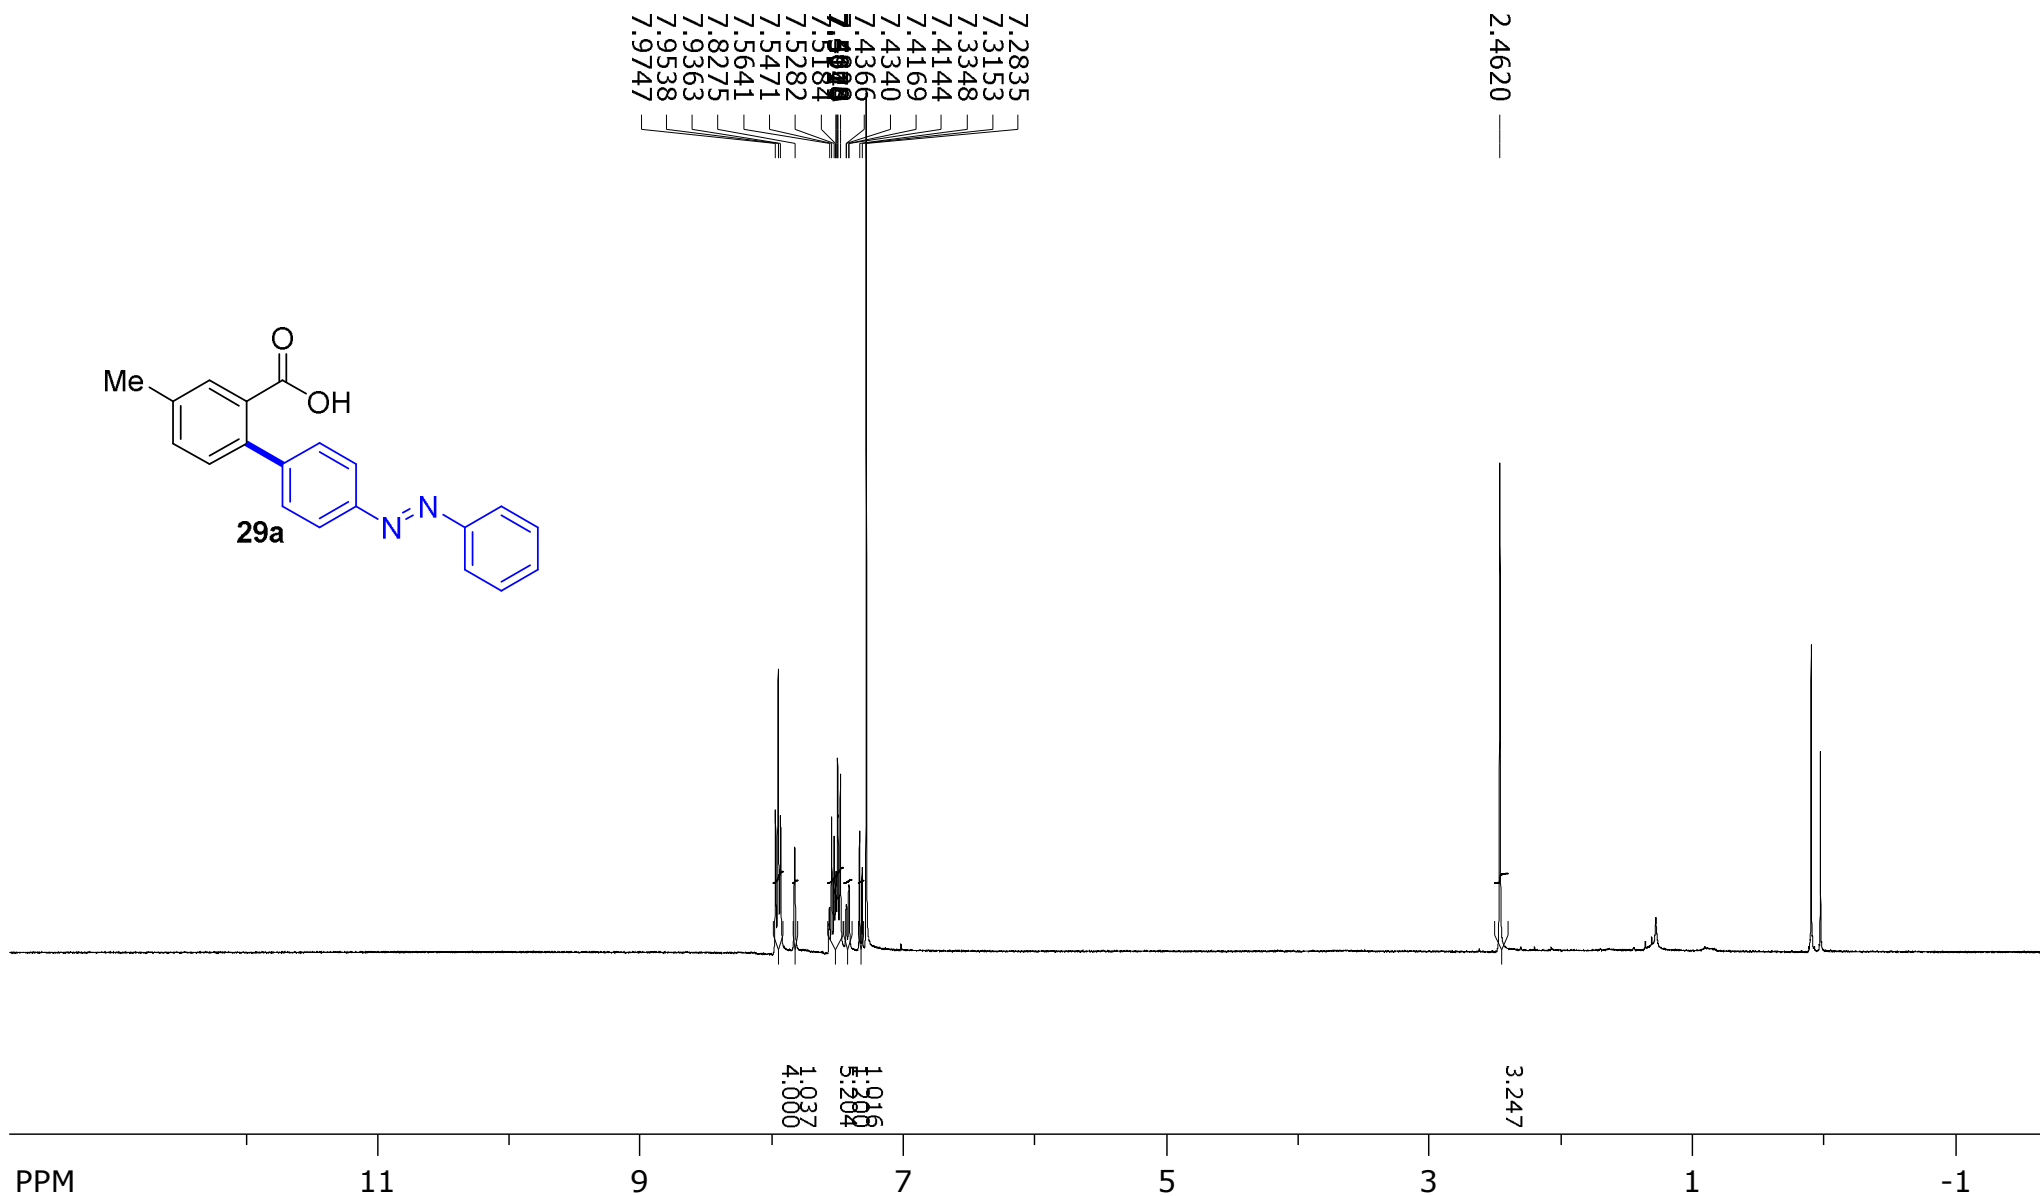

SpinWorks 4: S S 188  
PROTON CDCl3 /opt/topspin3.5pl2/nmrdata nmrsu 18



7.9363  
7.9538  
7.9747

7.8275

7.4808  
7.4978  
7.5018  
7.5114  
7.5149  
7.5184  
7.5282  
7.5471  
7.5641

7.4144  
7.4169  
7.4340  
7.4366

7.3153  
7.3348

7.2835

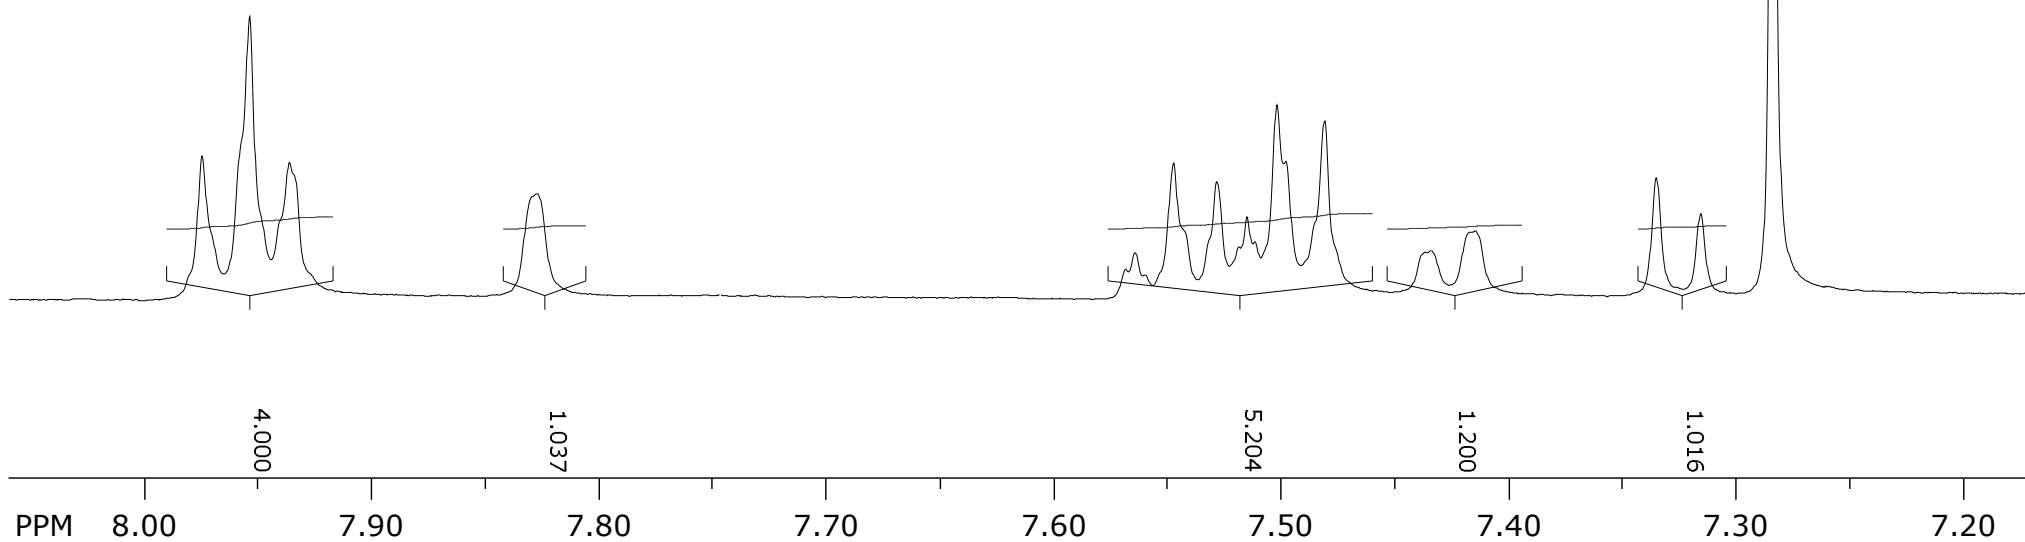

SpinWorks 4: SS 188 ACID  
C13CPD256 CDCl3 /opt/topspin3.5pl2/nmrdata nmrsu 48

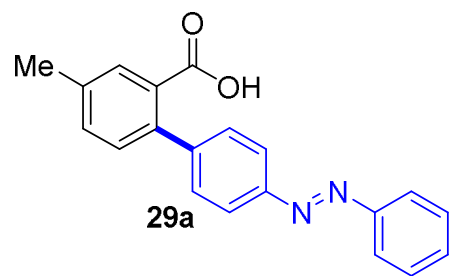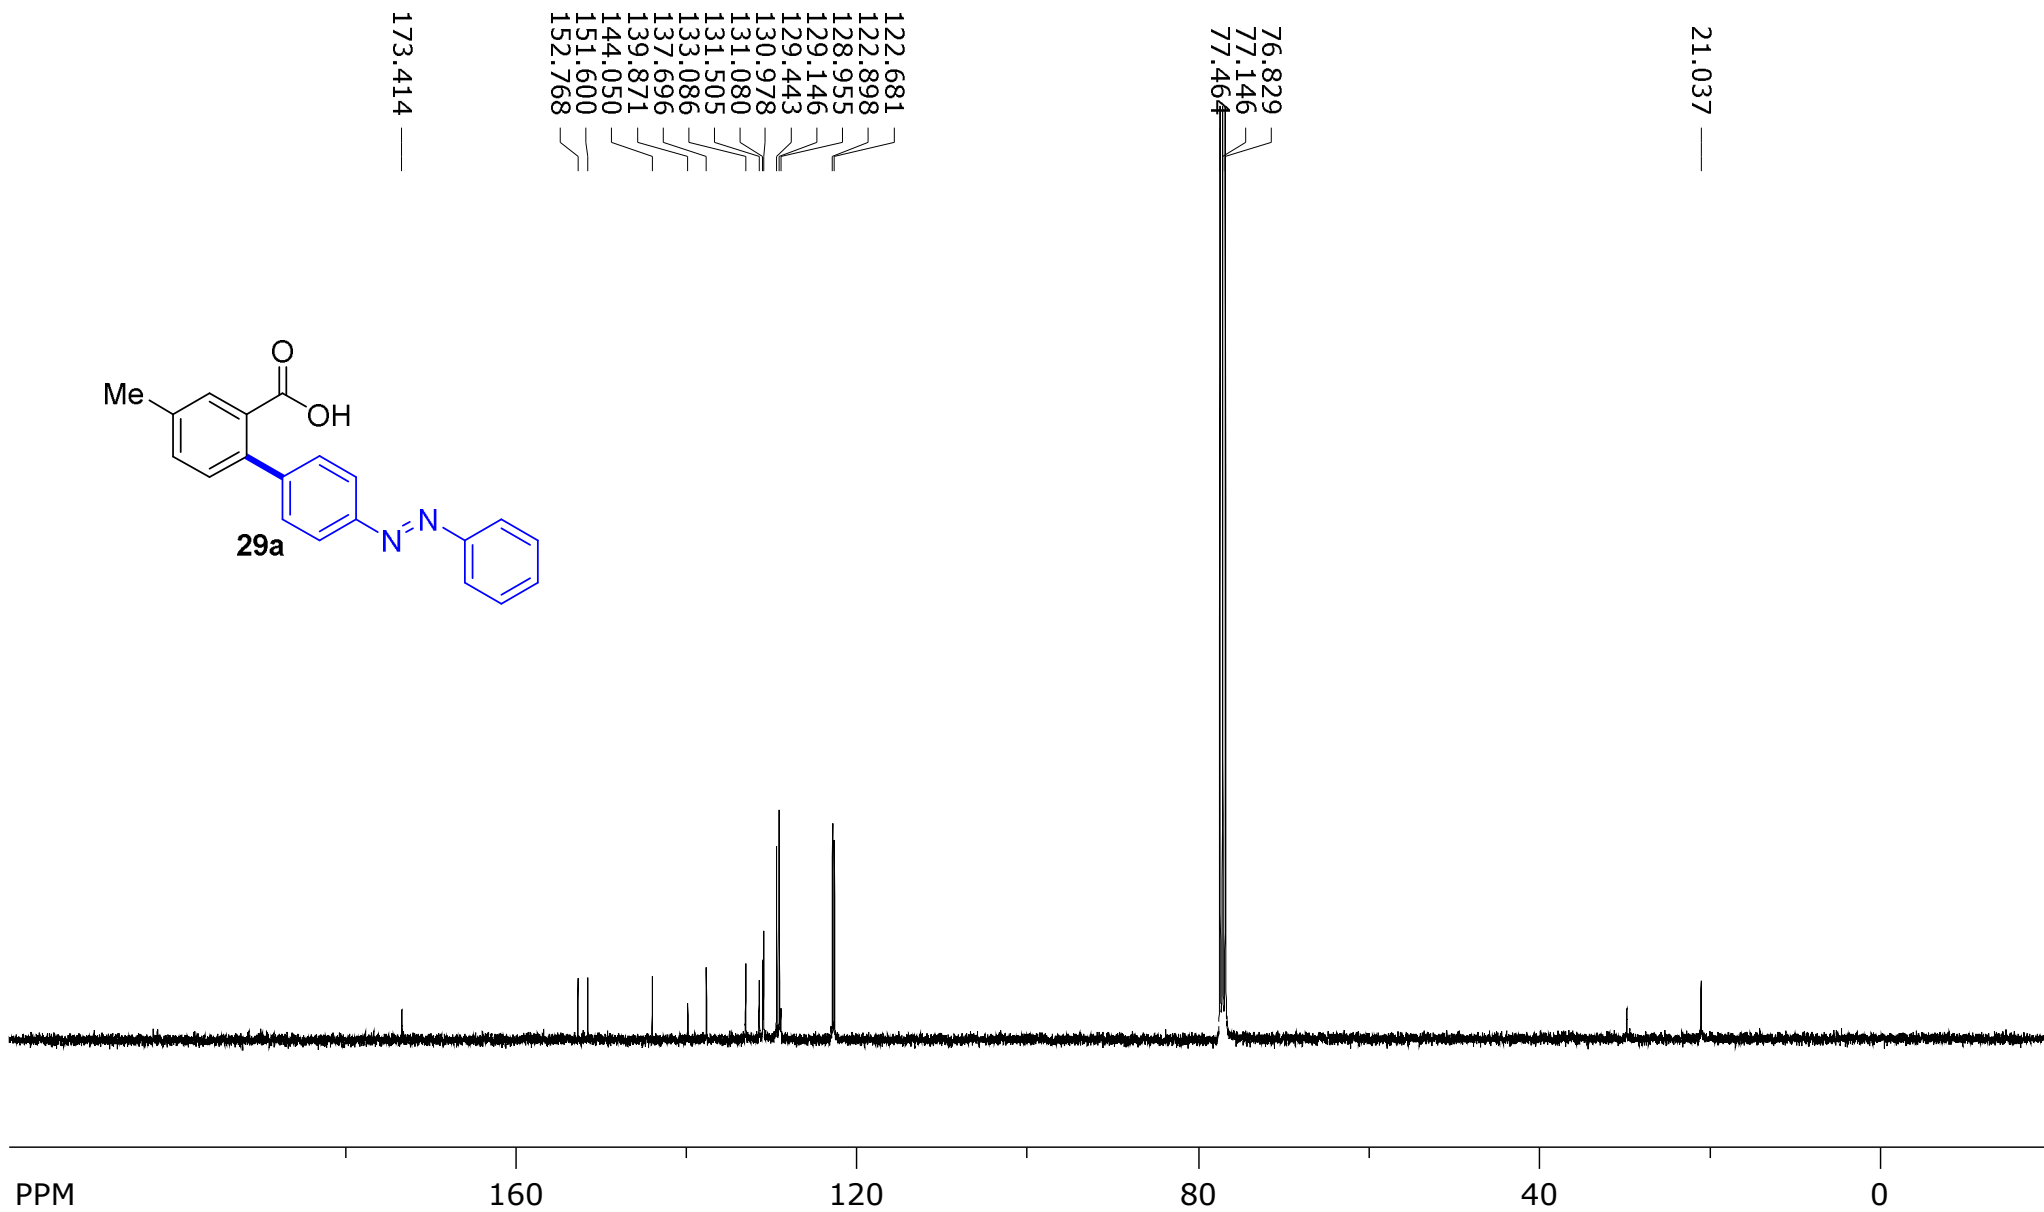

PPM

160

120

80

40

0

SpinWorks 4: SS-847REP2  
{PROTON 64} CDCl3 /opt/topspin3.5pl2/nmrdata nmrsu 22

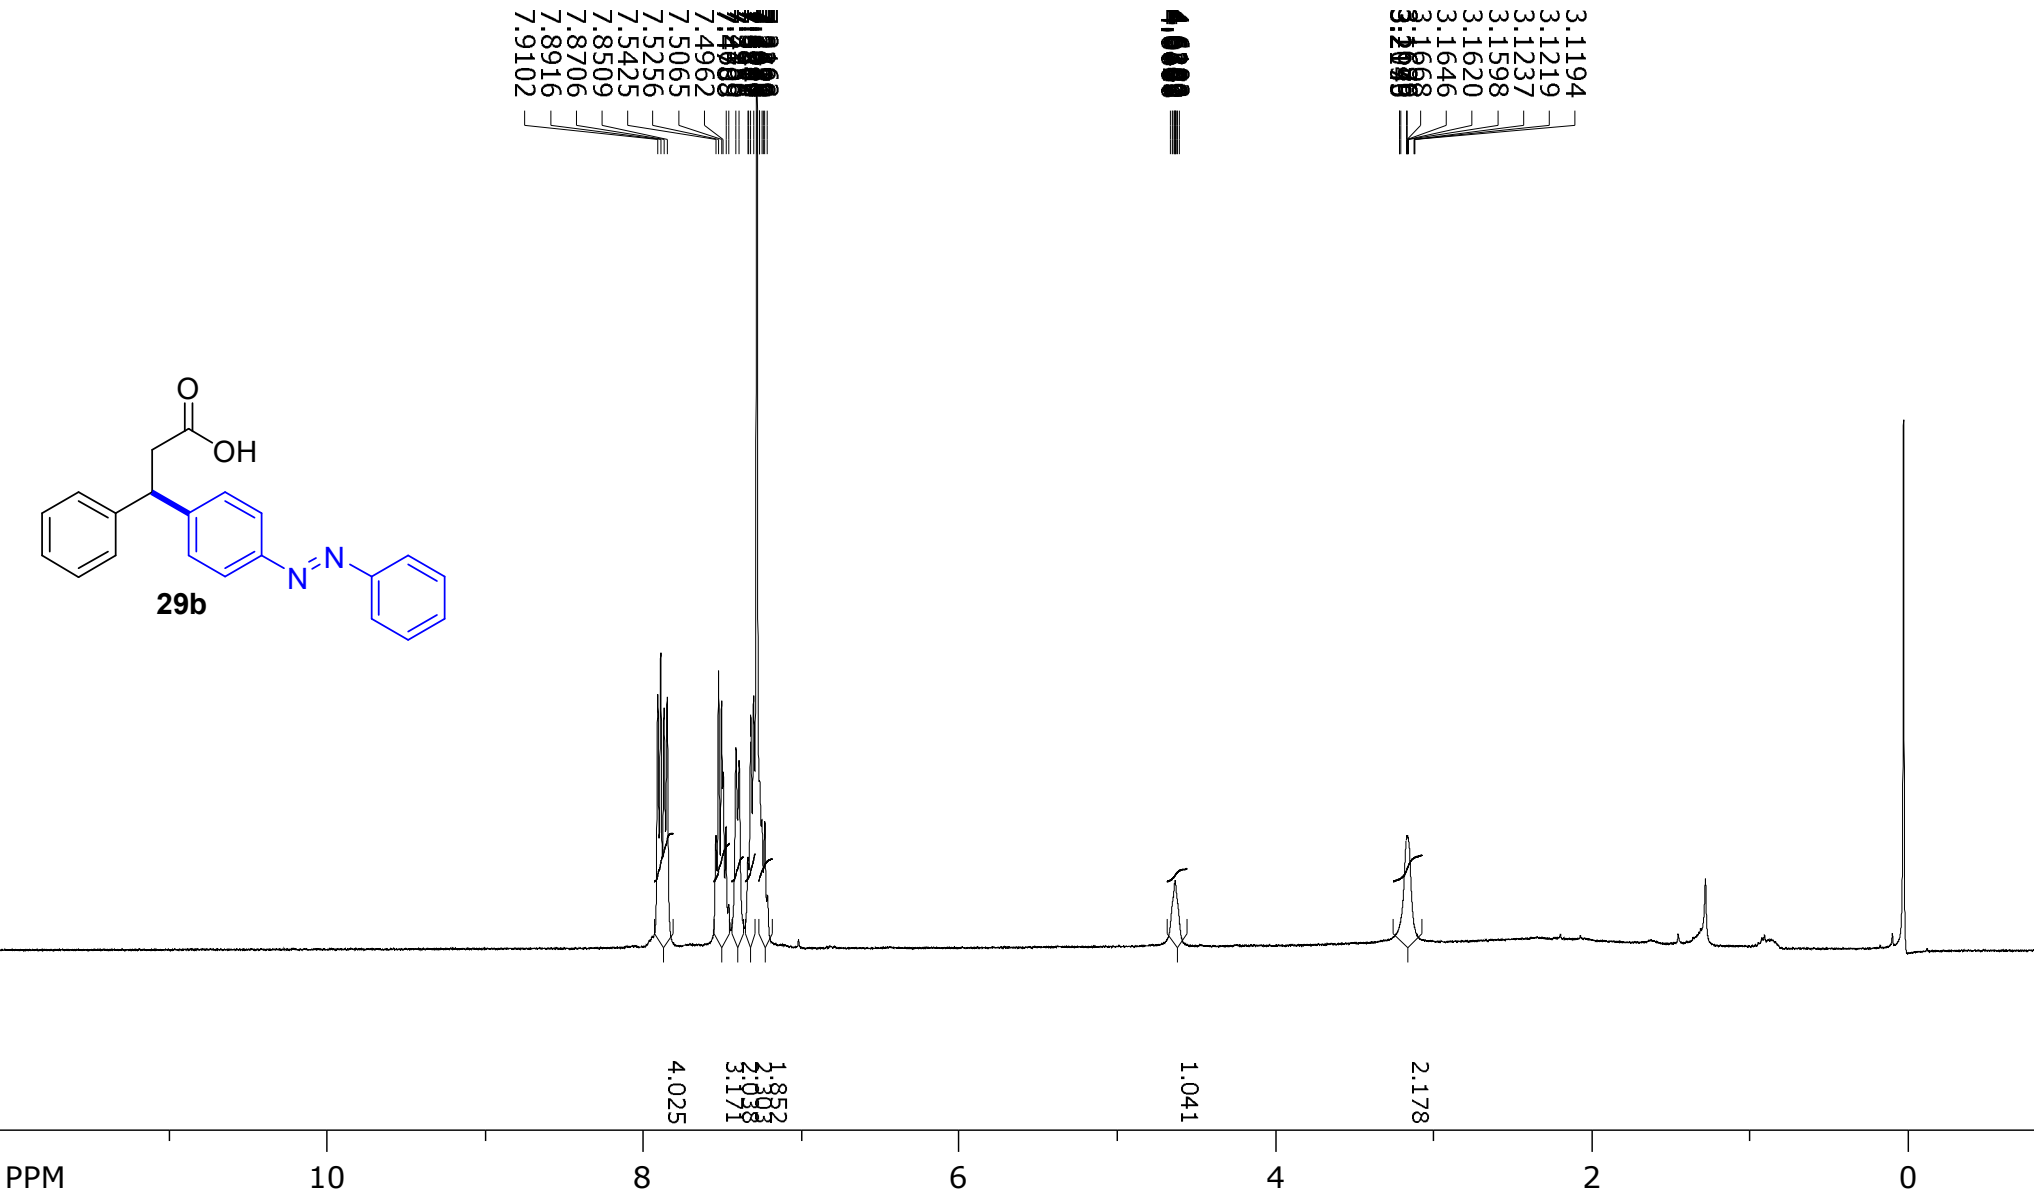



SpinWorks 4: SS-847REP2  
{PROTON 64} CDCl3 /opt/topspin3.5pl2/nmrdata nmrsu 22

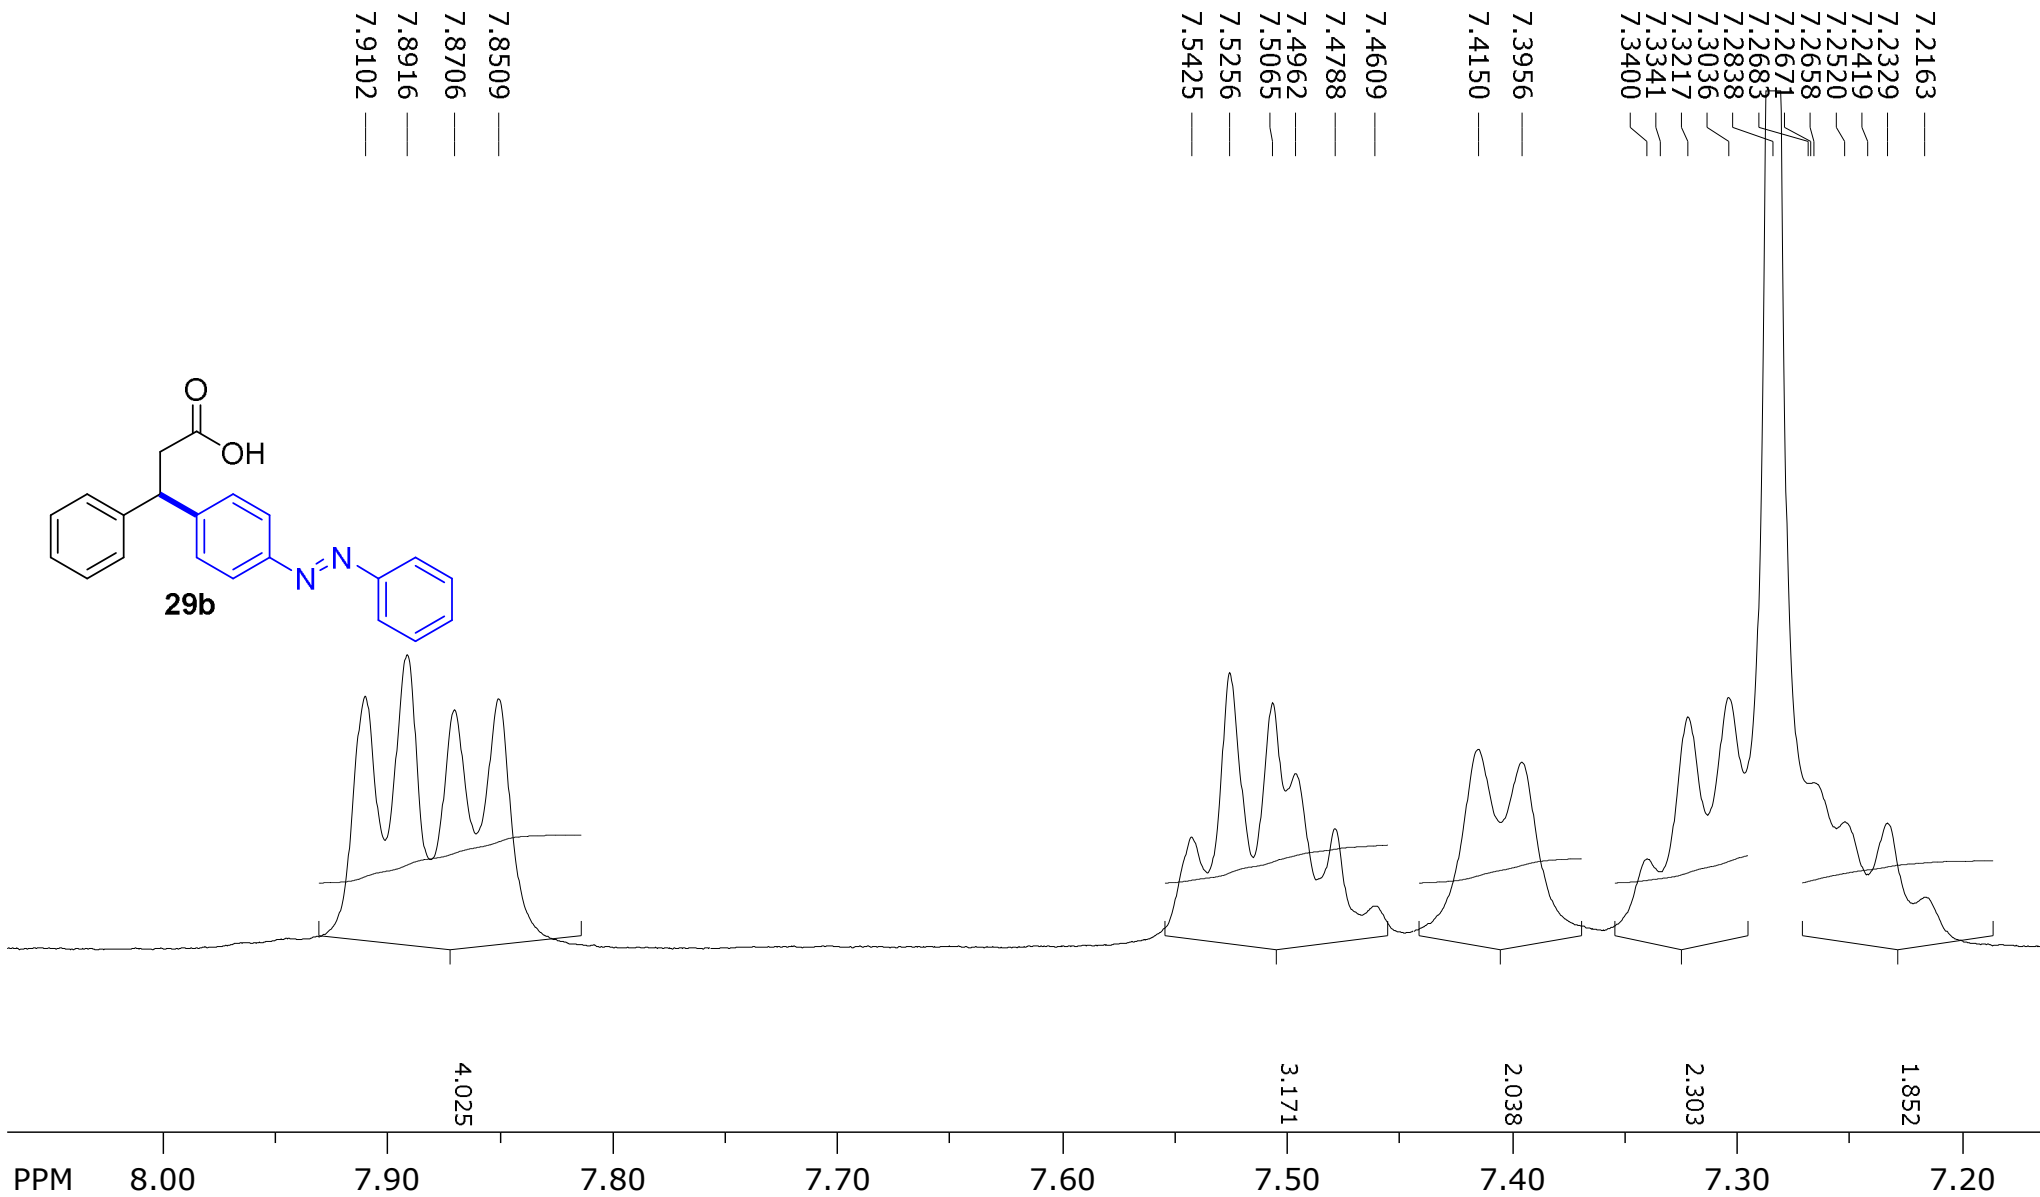

SpinWorks 4: SS-847REP2  
{PROTON 64} CDCl3 /opt/topspin3.5pl2/nmrdata nmrsu 22

4.6102  
4.6200  
4.6249  
4.6342  
4.6352  
4.6361  
4.6370  
4.6489  
4.6523  
4.6666

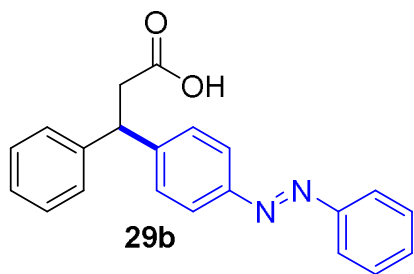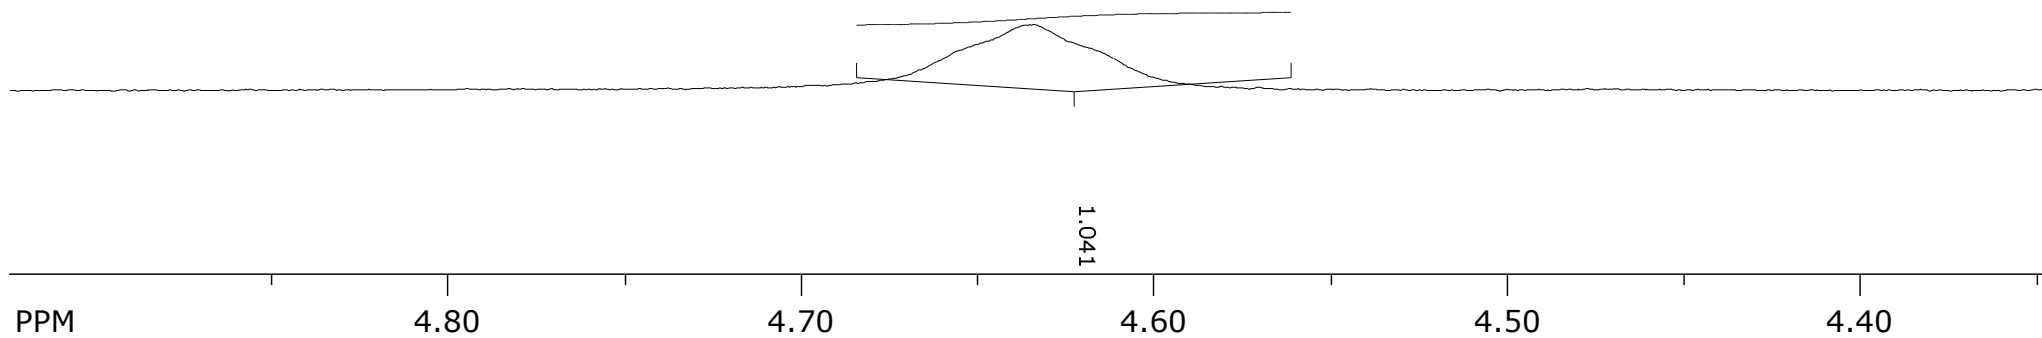

SpinWorks 4: SS-847REP2  
{PROTON 64} CDCl3 /opt/topspin3.5pl2/nmrdata nmrsu 22

3.2070 —  
3.2143 —  
3.2155 —

3.1598 —  
3.1620 —  
3.1646 —  
3.1668 —  
3.1679 —  
3.1686 —

3.1194 —  
3.1219 —  
3.1237 —

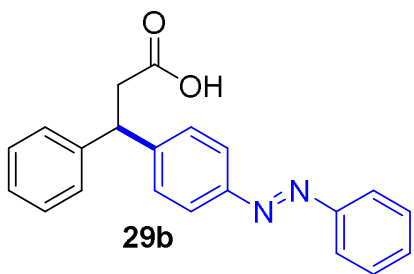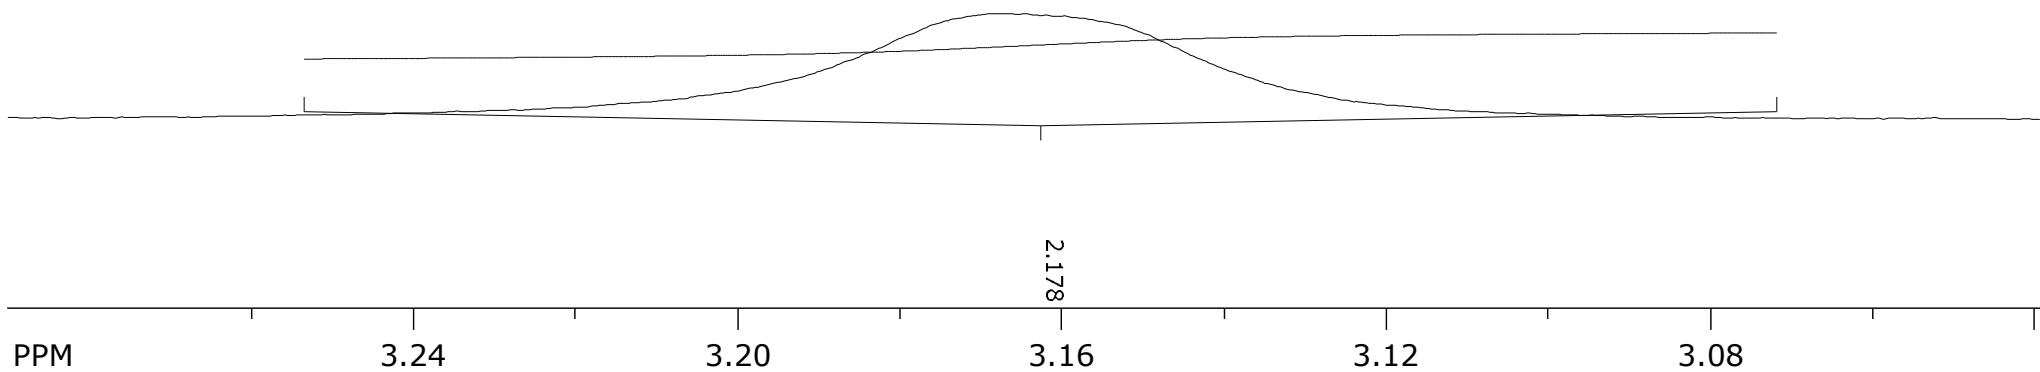

SpinWorks 4: SS-847 REP  
C13CPD256 CDCl3 /opt/topspin3.5pl2/nmrdata nmrsu 31

122.806  
123.174  
126.887  
127.650  
128.421  
128.782  
129.089  
130.938  
142.721  
146.381  
151.398  
152.680

76.722  
77.040  
77.357

46.550

29.725



PPM

160

120

80

40

0

360

SpinWorks 3: SS-847 REP

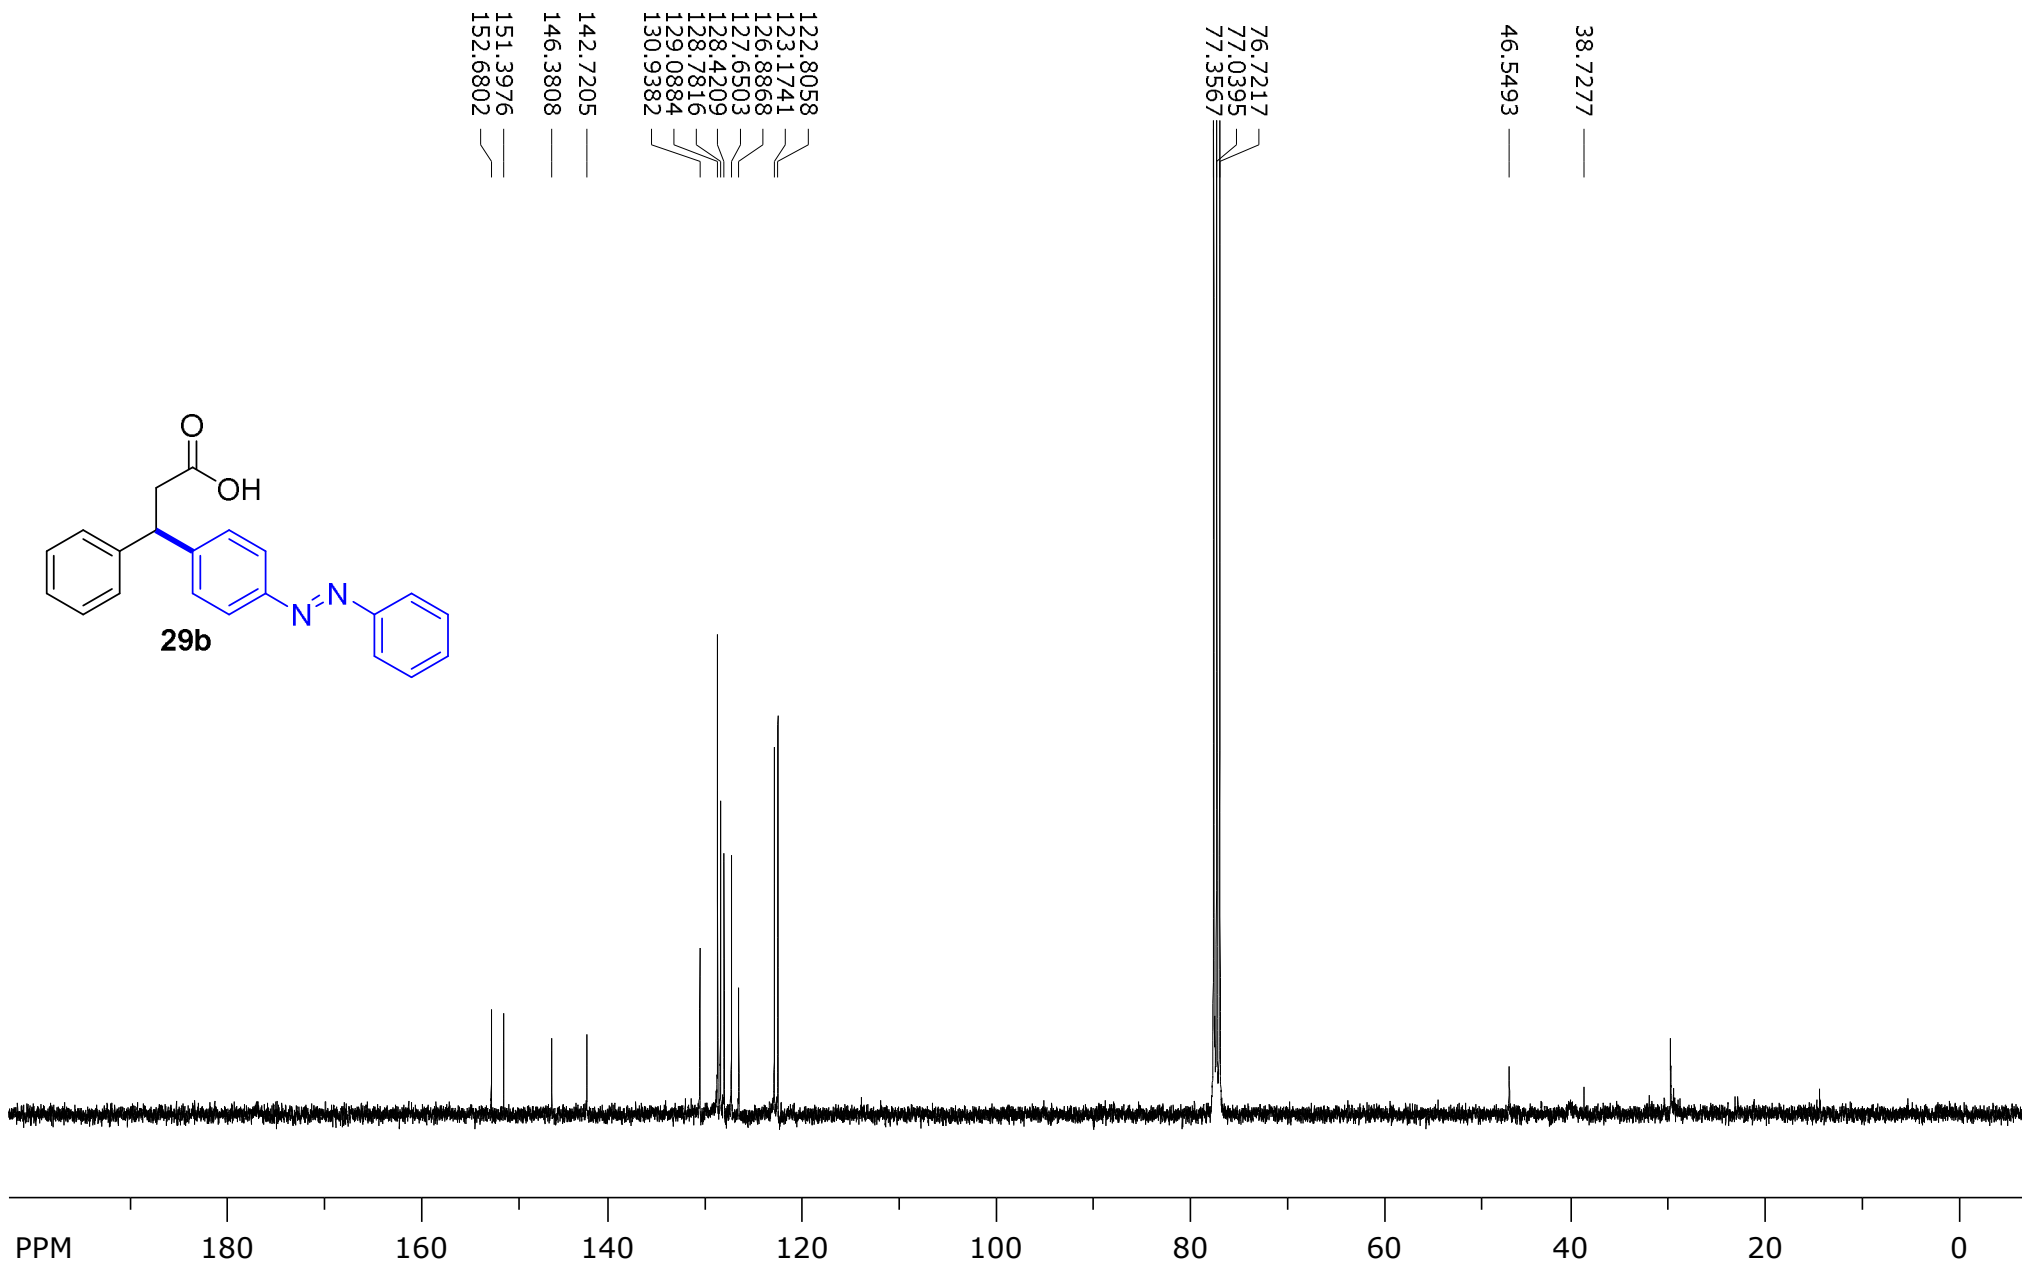

SpinWorks 4: SS-848 REP  
PROTON DMSO /opt/topspin3.5pl2/nmrdata nmrsu 2

7.2884  
7.1891  
7.1891  
7.1891  
7.1891  
7.6453  
7.6869  
7.7080  
7.9077  
7.9145  
7.9194  
7.9298

2.5023  
2.5065  
2.5107  
3.3308  
3.3342  
3.3370  
3.3424  
3.3449  
3.3480  
3.3480

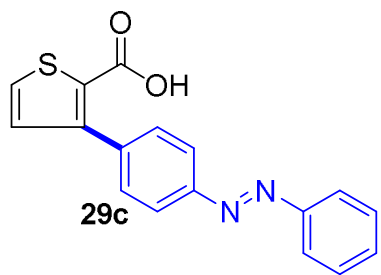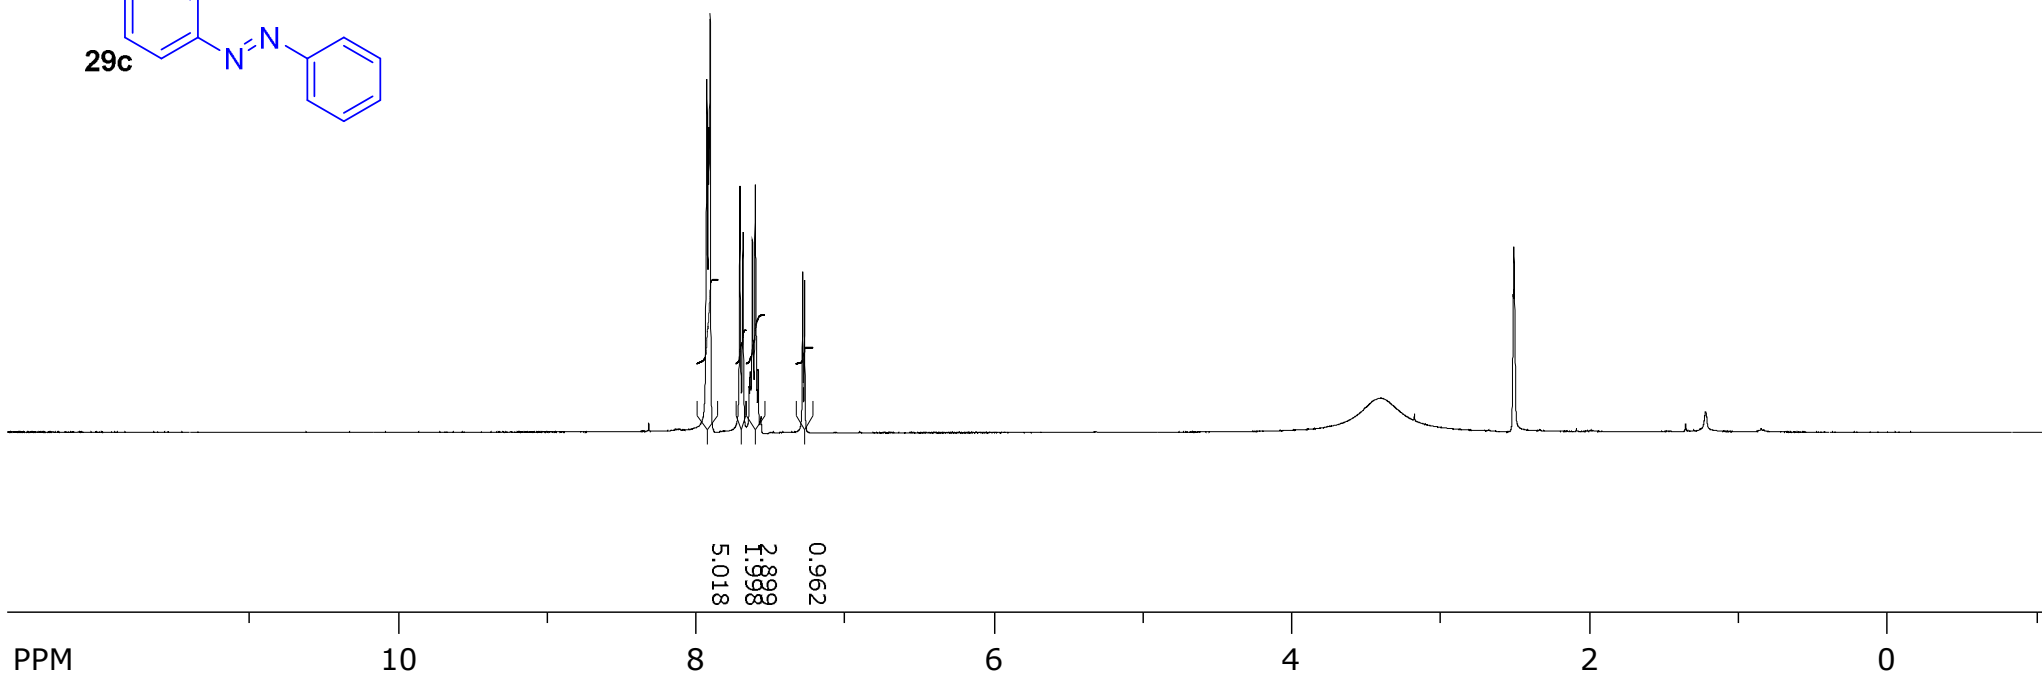

SpinWorks 4: SS-848 REP  
PROTON DMSO /opt/topspin3.5pl2/nmrdata nmrsu 2

7.9077  
7.9145  
7.9194  
7.9298

7.6869  
7.7080

7.6453  
7.6391  
7.6345  
7.6237  
7.6050  
7.5926  
7.5857  
7.5667

7.2734  
7.2861

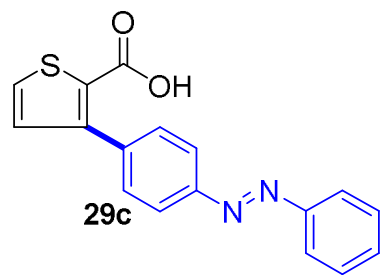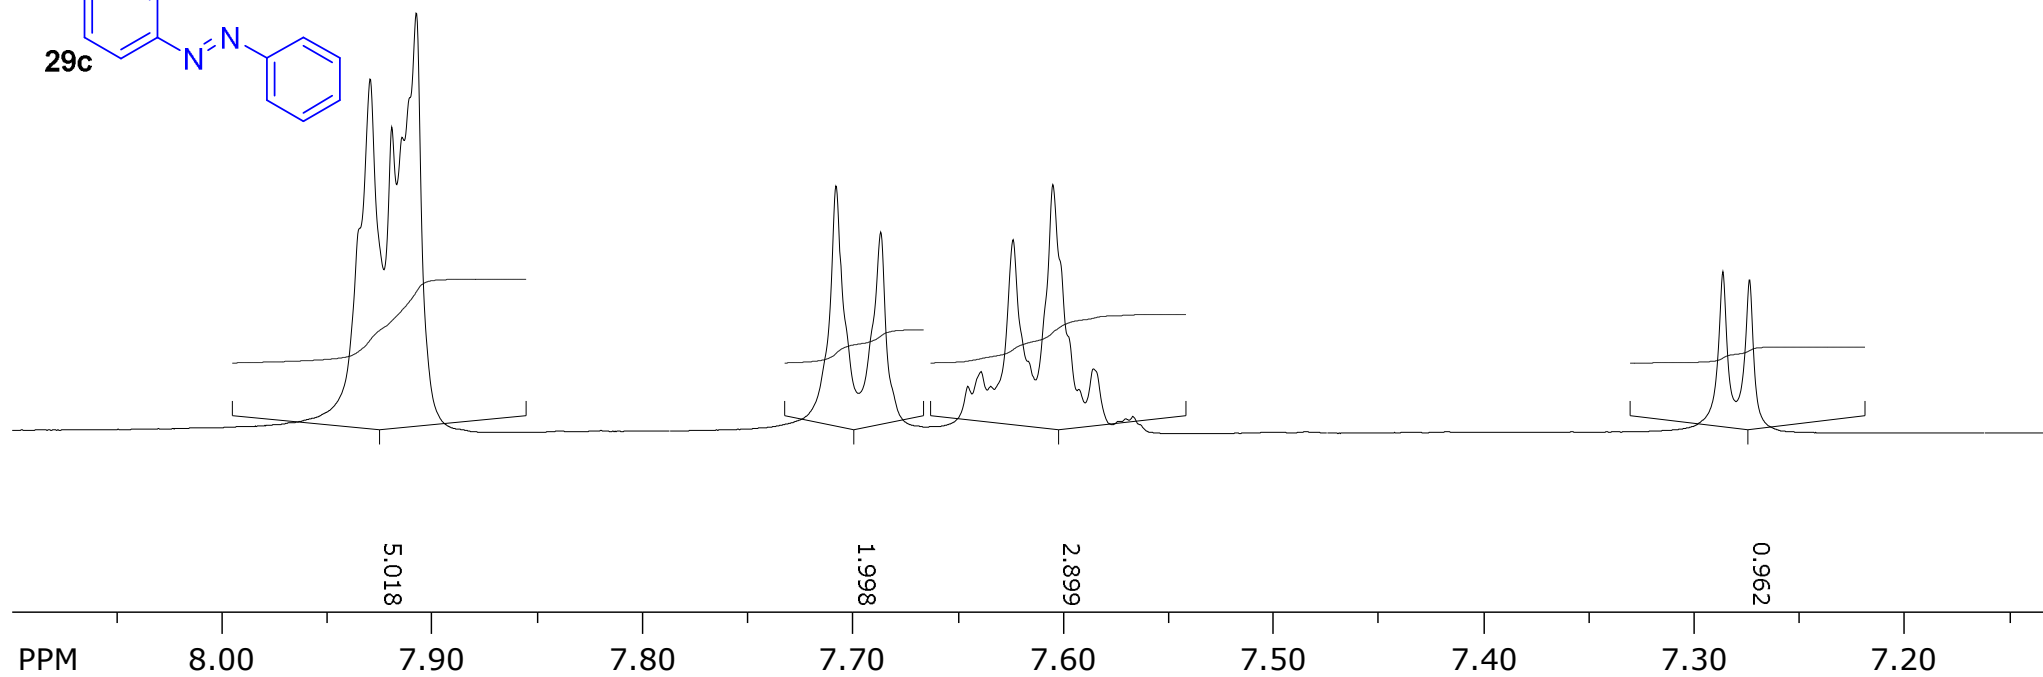

SpinWorks 4: SS-848 REP  
C13CPD256 DMSO /opt/topspin3.5pl2/nmrdata nmrsu 2

163.294 —  
152.475 —  
151.562 —  
146.362 —  
139.077 —  
132.071 —  
131.988 —  
131.785 —  
130.985 —  
129.980 —  
129.539 —  
123.063 —  
122.454 —

39.318 —  
39.527 —  
39.736 —  
39.945 —  
40.153 —  
40.362 —  
40.571 —

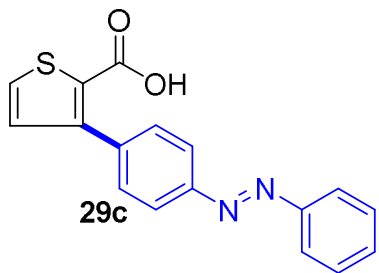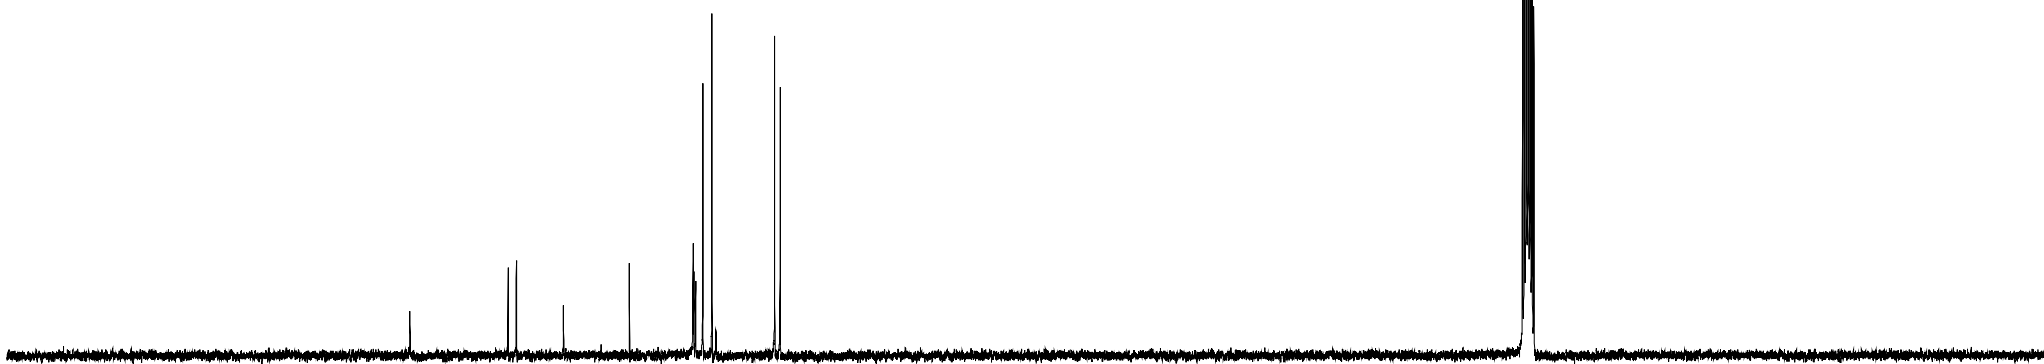

PPM 160 120 80 40 0



# UV-Vis absorption chart ( $\lambda_{\max}$ ) of compounds 5a-j,7a,b

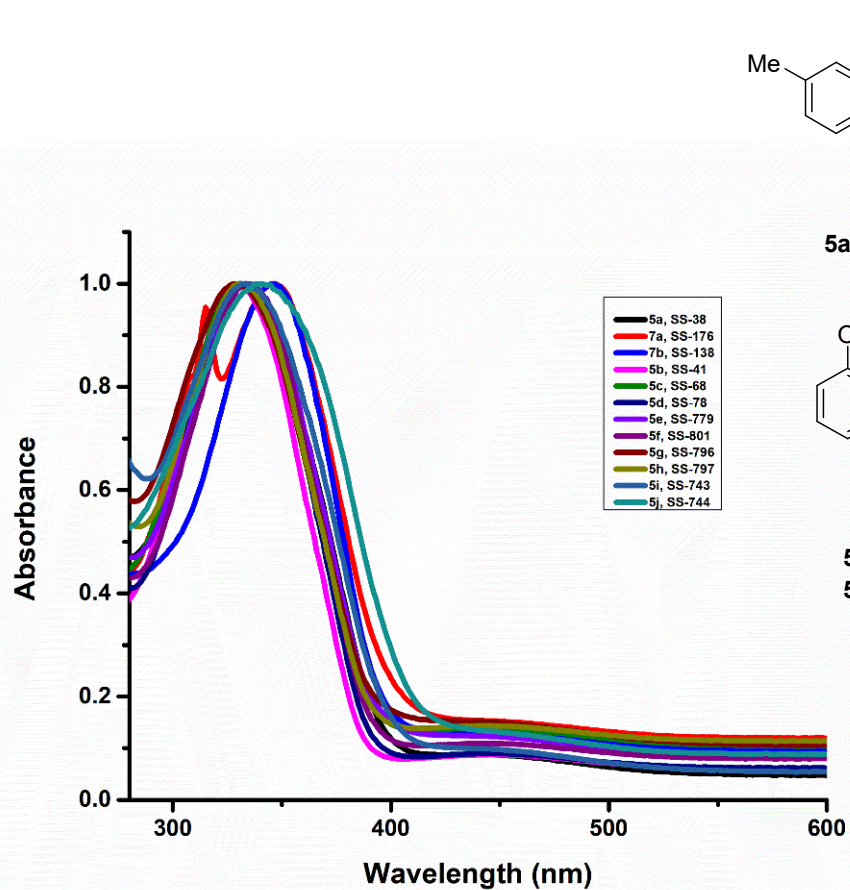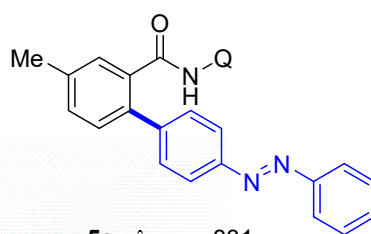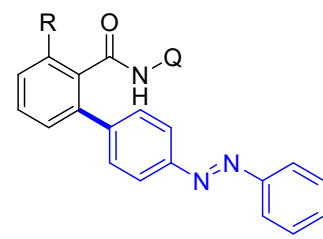

**5c** : R = Me :  $\lambda_{\max} = 332$  nm

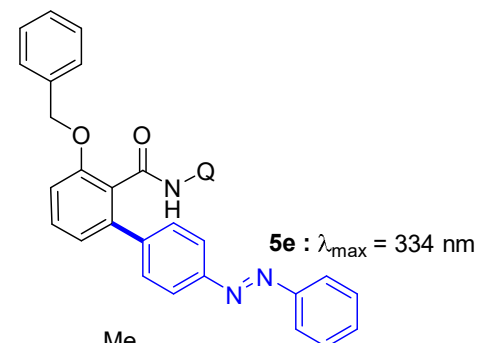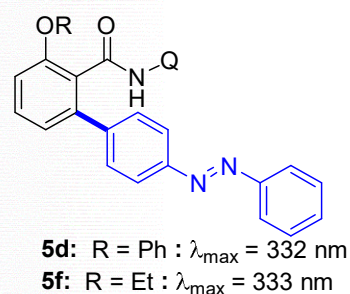

**5f** : R = Et :  $\lambda_{\max} = 333$  nm

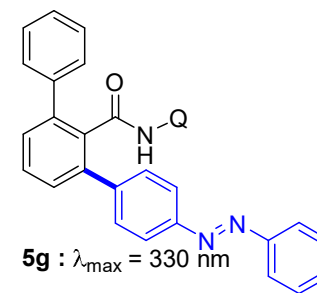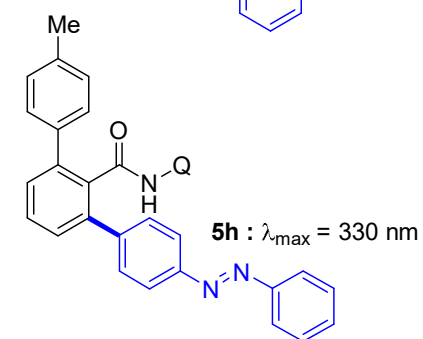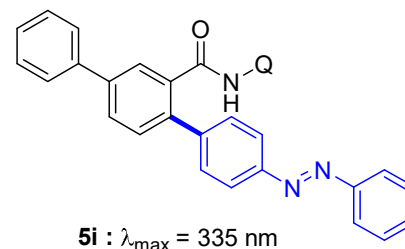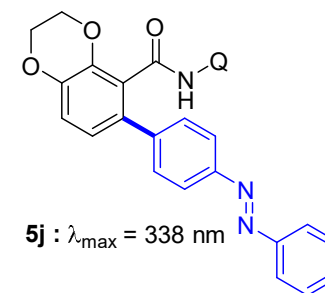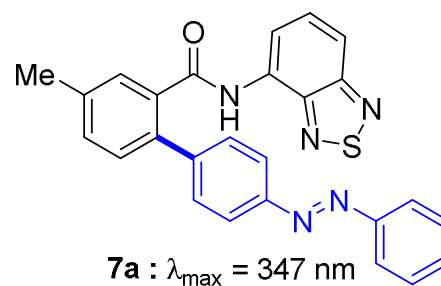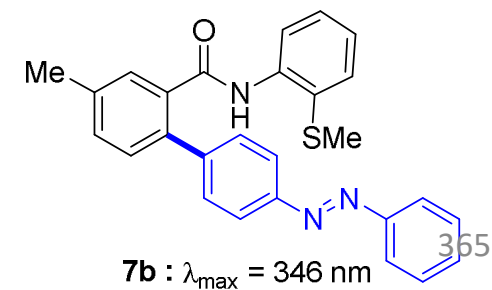

# UV-Vis absorption chart ( $\lambda_{\max}$ ) of compounds 8a-d

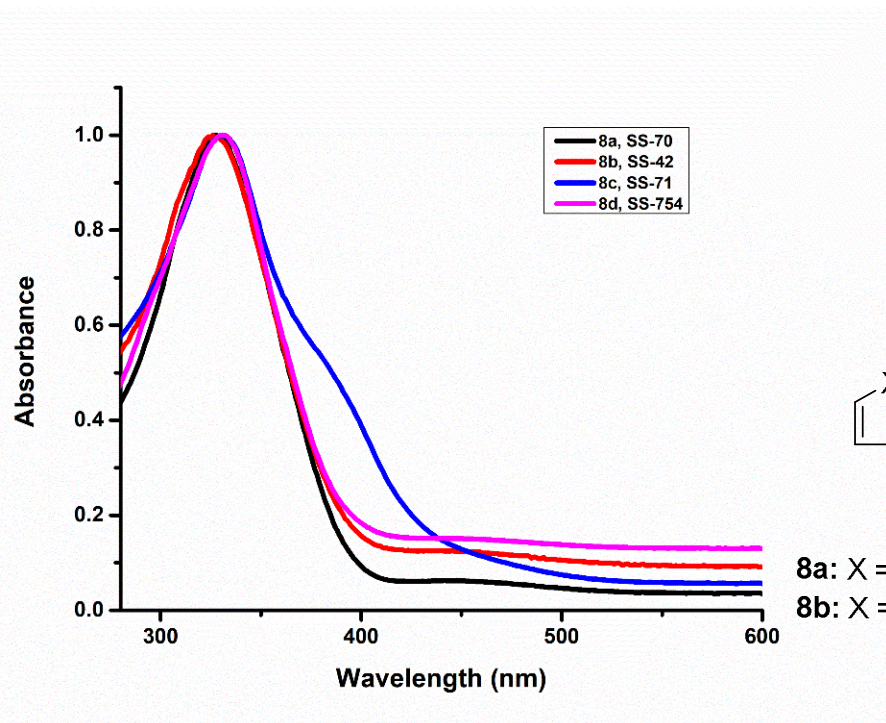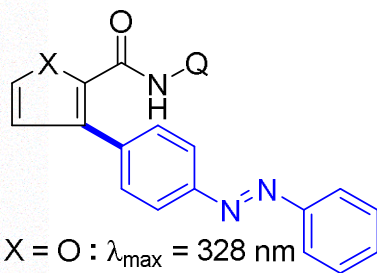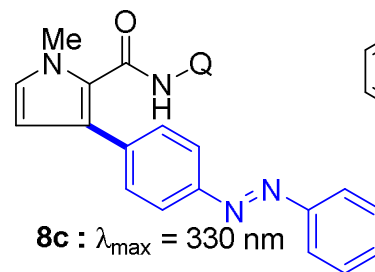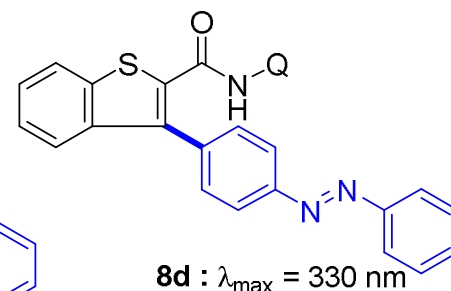

## UV-Vis absorption chart ( $\lambda_{\max}$ ) of compounds 10a-f, 12a, 14a

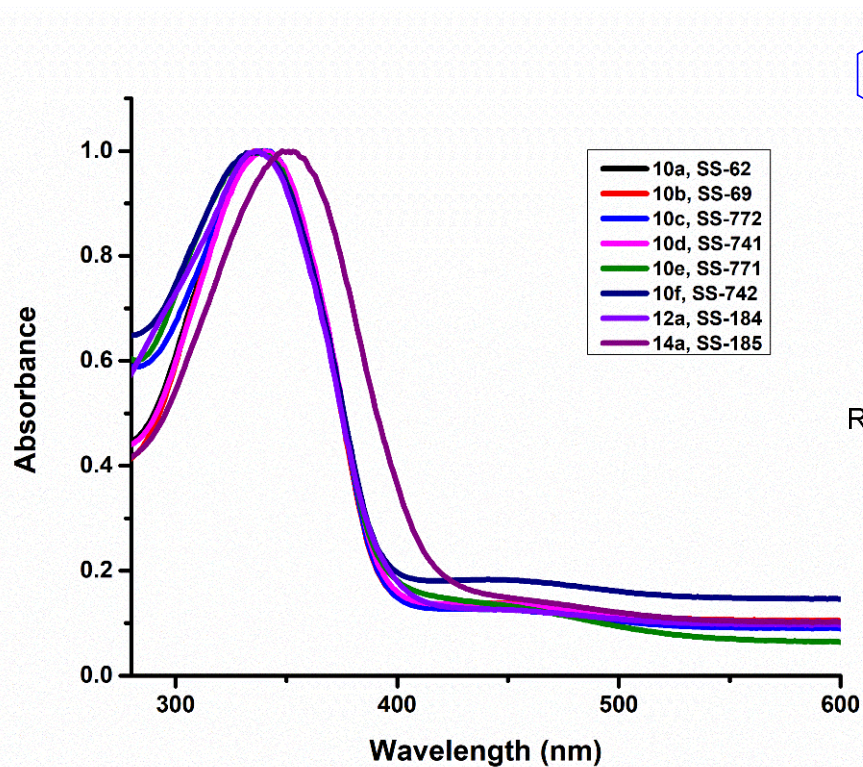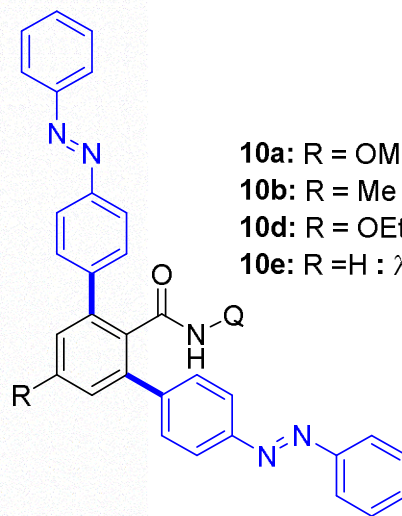

10a: R = OMe :  $\lambda_{\max}$  = 337 nm  
10b: R = Me :  $\lambda_{\max}$  = 335 nm  
10d: R = OEt :  $\lambda_{\max}$  = 340 nm  
10e: R = H :  $\lambda_{\max}$  = 338 nm

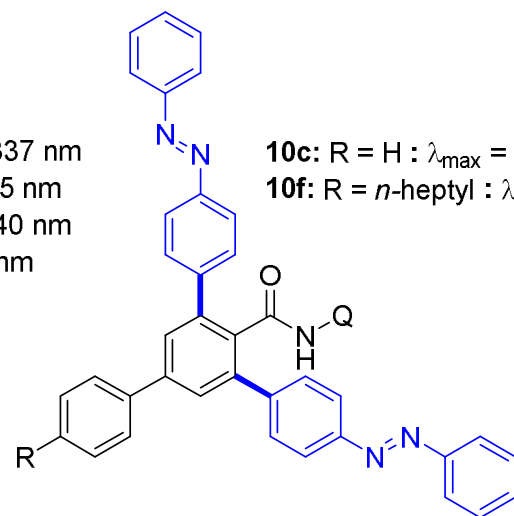

10c: R = H :  $\lambda_{\max}$  = 341 nm  
10f: R = *n*-heptyl :  $\lambda_{\max}$  = 337 nm

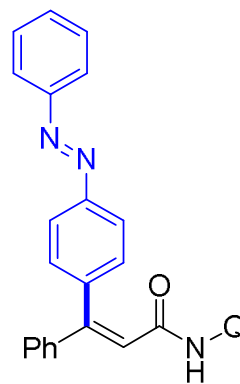

12a :  $\lambda_{\max}$  = 336 nm

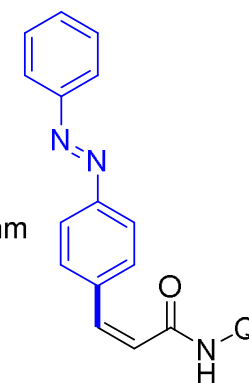

14a :  $\lambda_{\max}$  = 348 nm



## UV-Vis absorption chart ( $\lambda_{\max}$ ) of compounds 15a-h

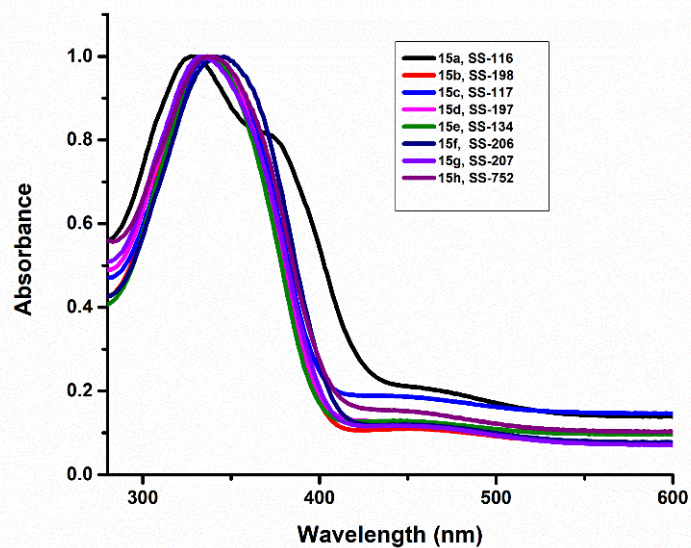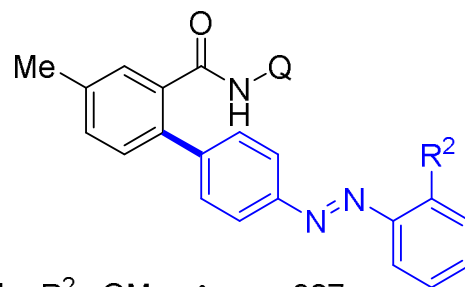

**15a:** R<sup>2</sup> = OMe :  $\lambda_{\max}$  = 327 nm

**15b:** R<sup>2</sup> = Me :  $\lambda_{\max}$  = 338 nm

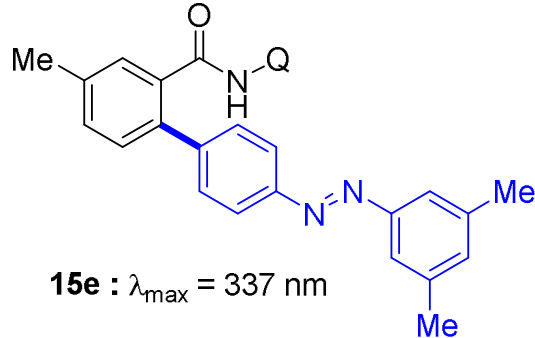

**15e:**  $\lambda_{\max}$  = 337 nm

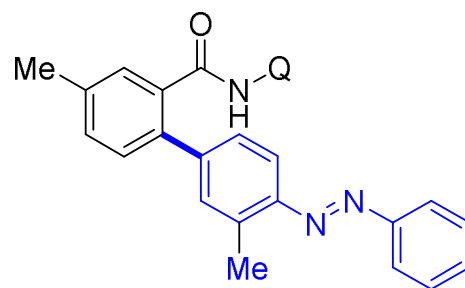

**15g:**  $\lambda_{\max}$  = 334 nm

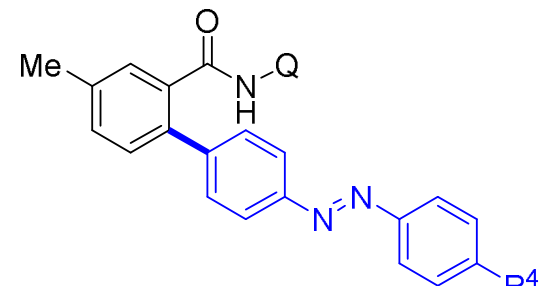

**15c:** R<sup>4</sup> = Me :  $\lambda_{\max}$  = 337 nm

**15d:** R<sup>4</sup> = Et :  $\lambda_{\max}$  = 335 nm

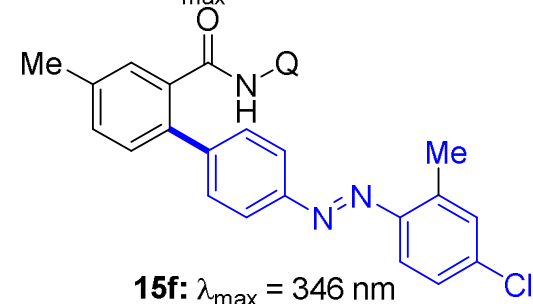

**15f:**  $\lambda_{\max}$  = 346 nm

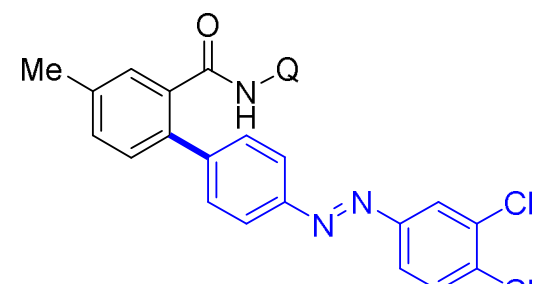

**15h:**  $\lambda_{\max}$  = 337 nm

# UV-Vis absorption chart ( $\lambda_{\max}$ ) of compounds 16a-b, 17a, 18a, 19a, 20a-c

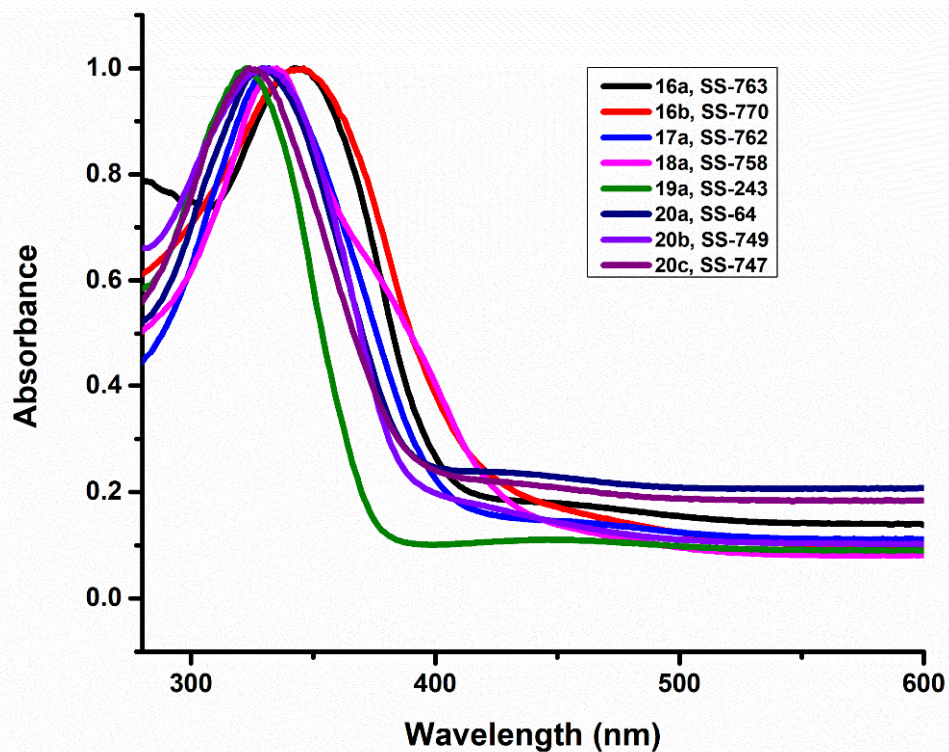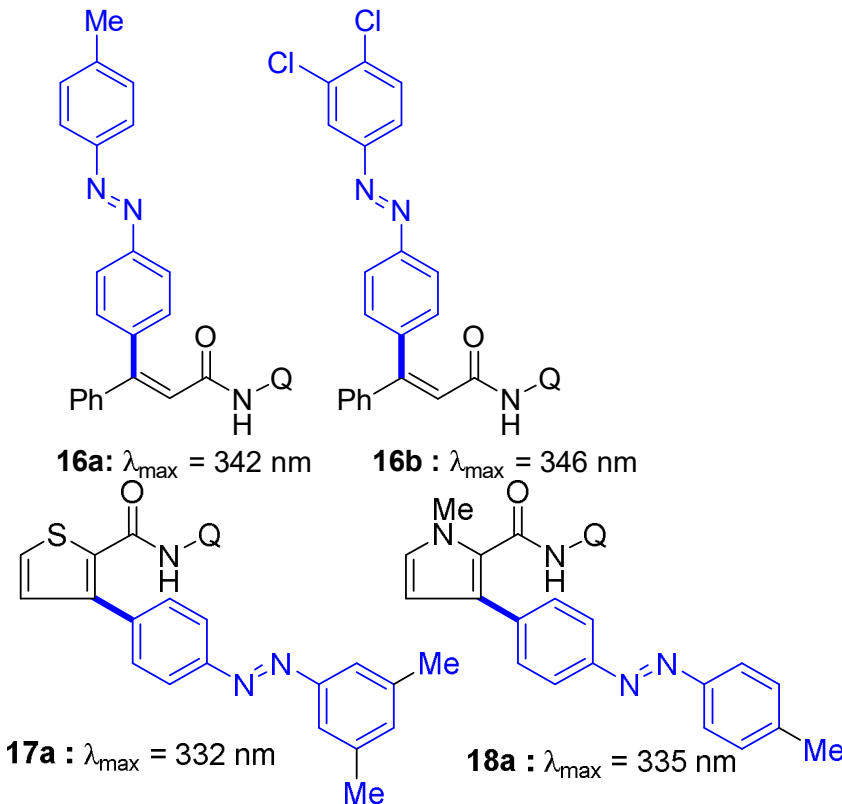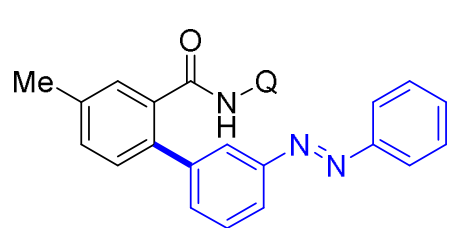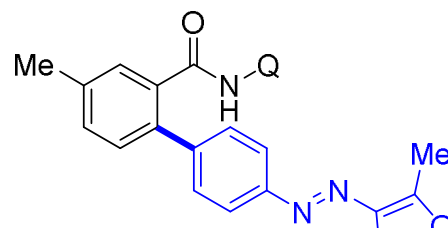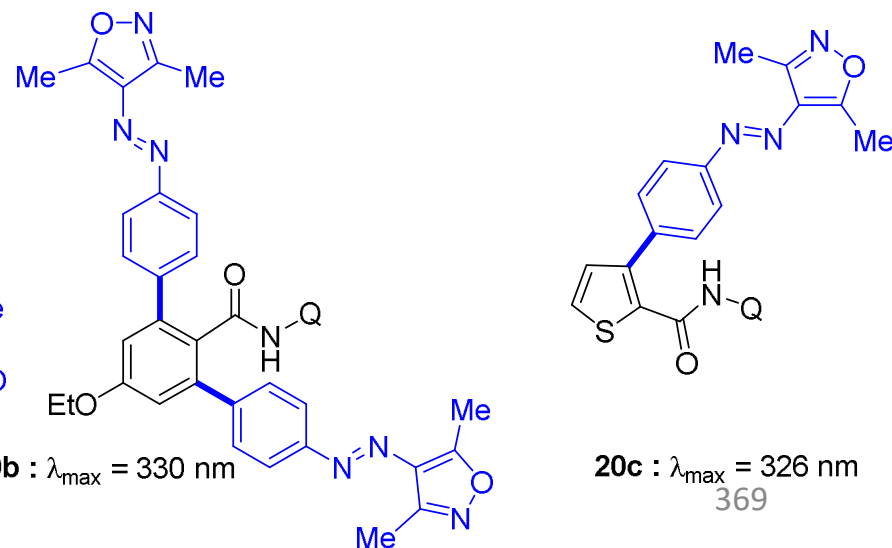

# UV-Vis absorption chart ( $\lambda_{\max}$ ) of compounds 22a-i

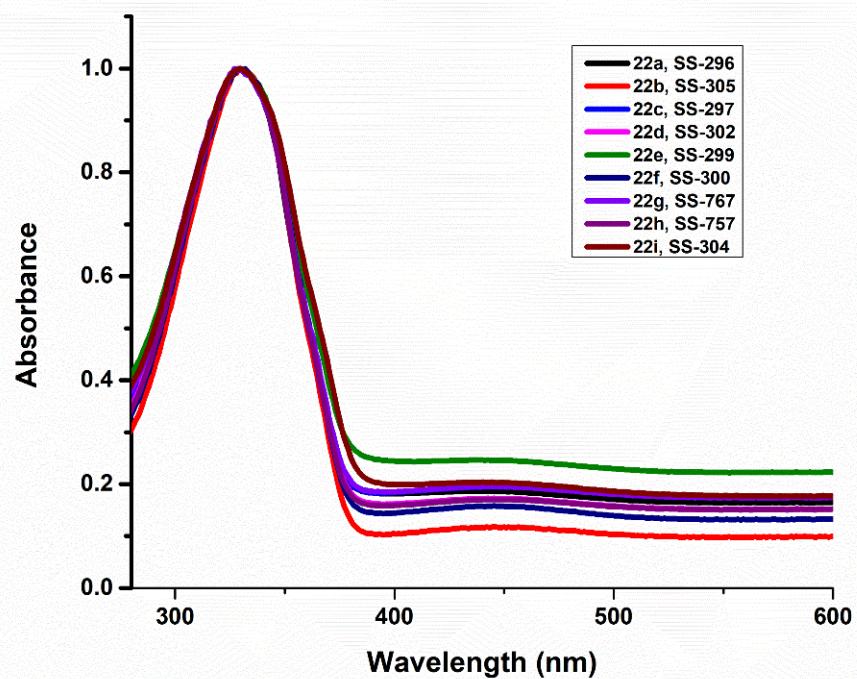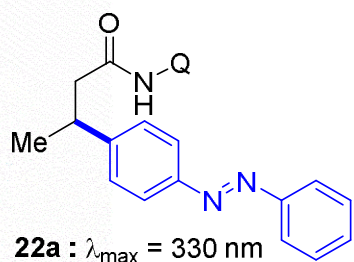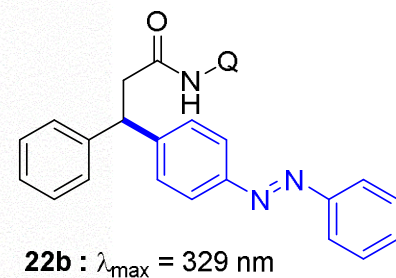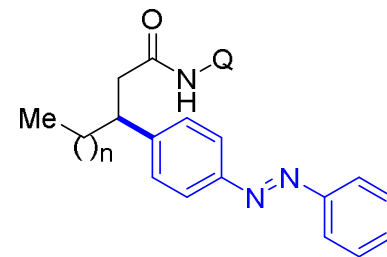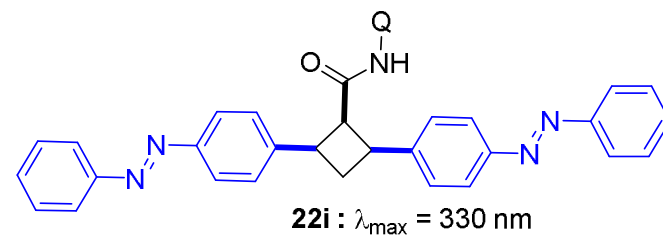



## UV-Vis absorption chart ( $\lambda_{\max}$ ) of compounds 24a-d

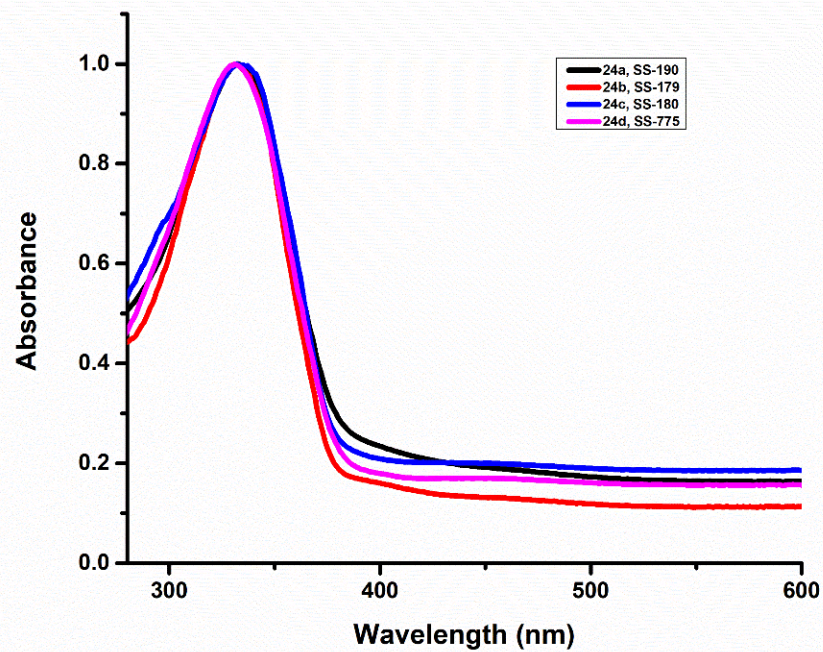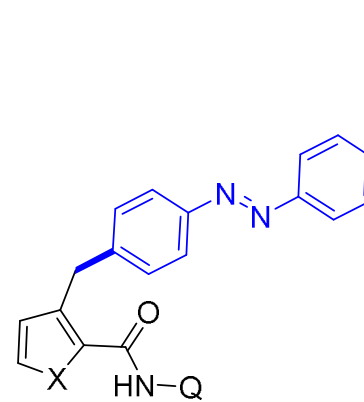

**24a:** X=O :  $\lambda_{\max}$  = 333 nm

**24b:** X=S :  $\lambda_{\max}$  = 332 nm

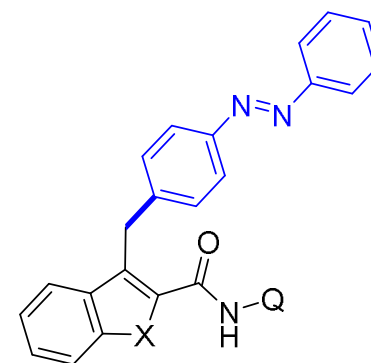

**24c:** X=O :  $\lambda_{\max}$  = 332 nm

**24d:** X=S :  $\lambda_{\max}$  = 331 nm

# UV-Vis absorption chart ( $\lambda_{\max}$ ) of compounds 26a-g

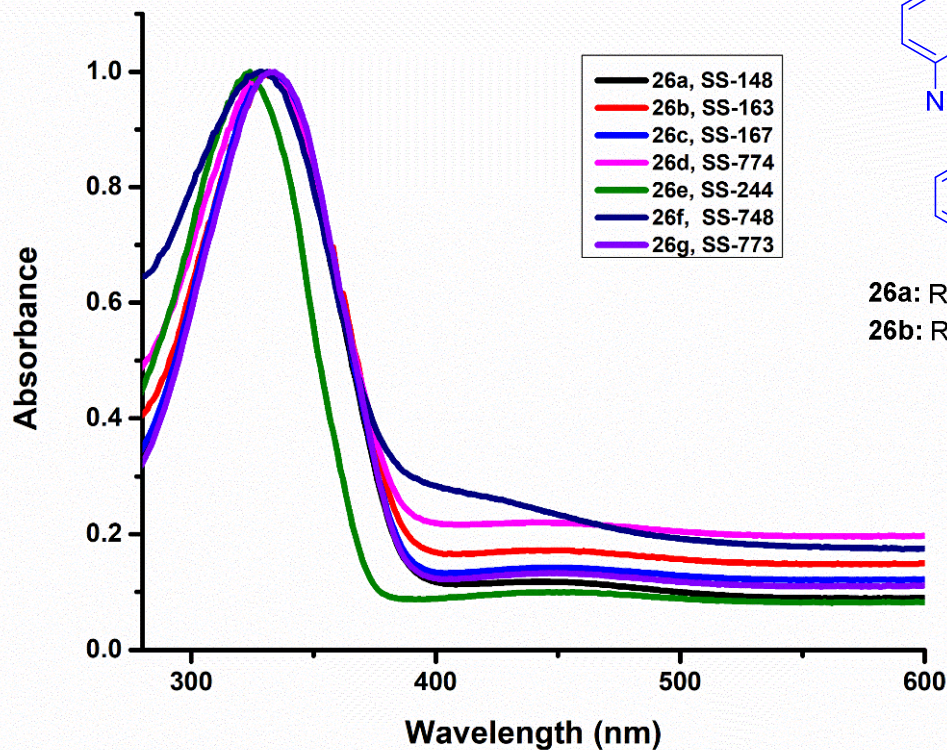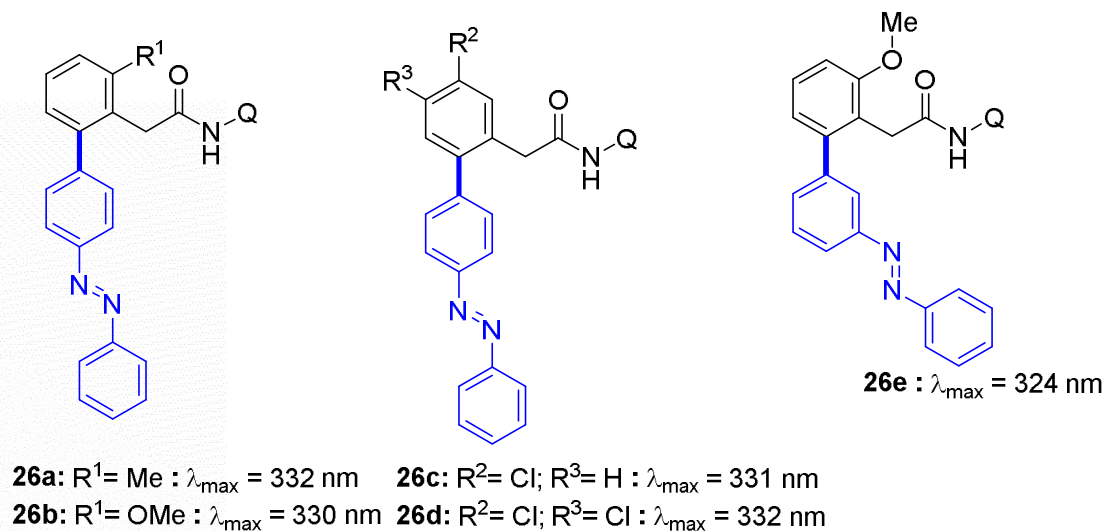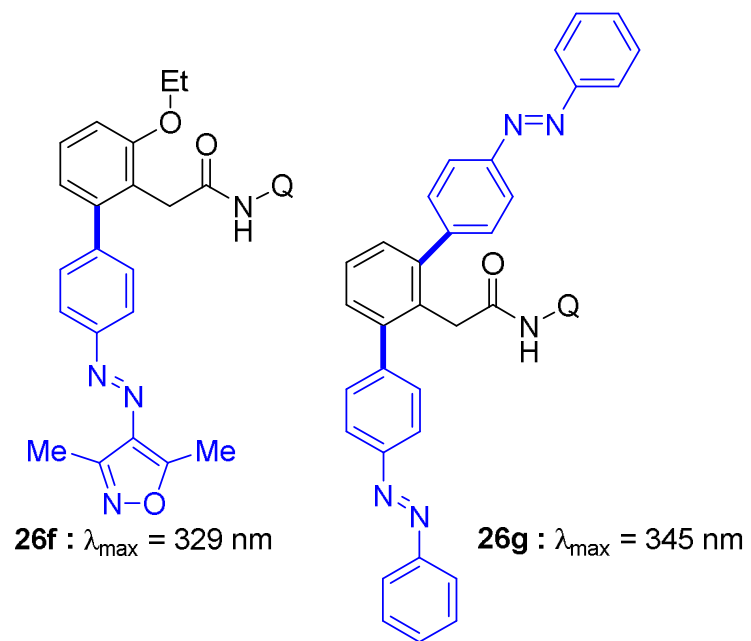



# UV-Vis absorption chart ( $\lambda_{\max}$ ) of compounds 28a-d

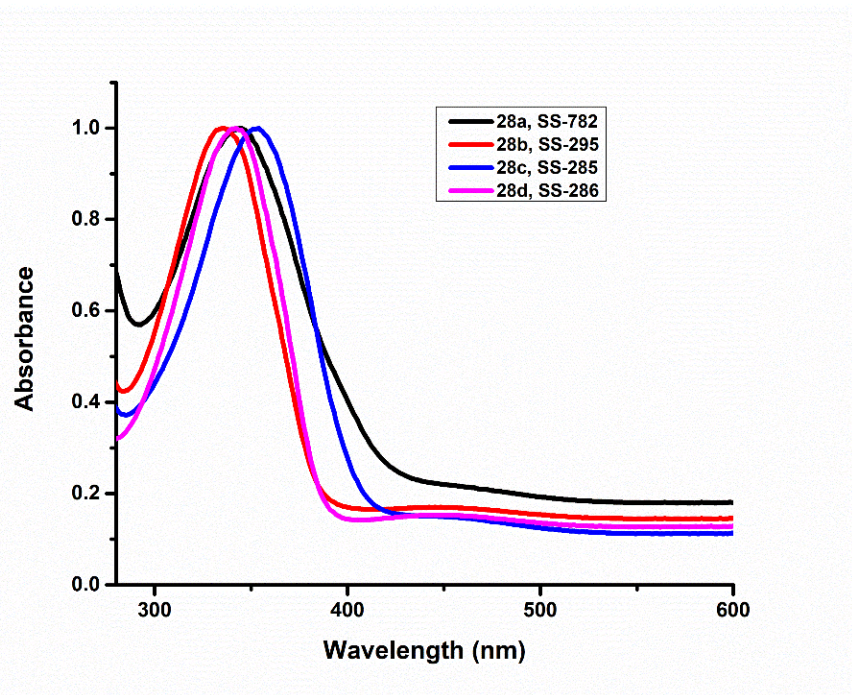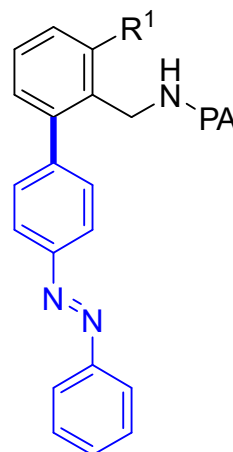

**28a:** R<sup>1</sup> = OMe :  $\lambda_{\max}$  = 345 nm

**28b:** R<sup>1</sup> = Cl :  $\lambda_{\max}$  = 336 nm

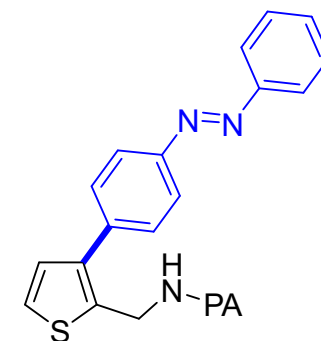

**28c:**  $\lambda_{\max}$  = 354 nm

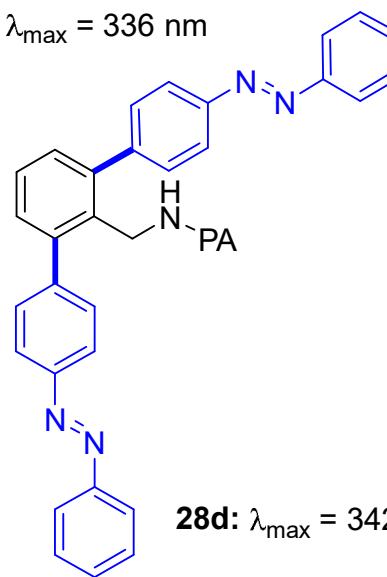

**28d:**  $\lambda_{\max}$  = 342 nm

# UV-Vis absorption chart ( $\lambda_{\max}$ ) of compounds 29a-c

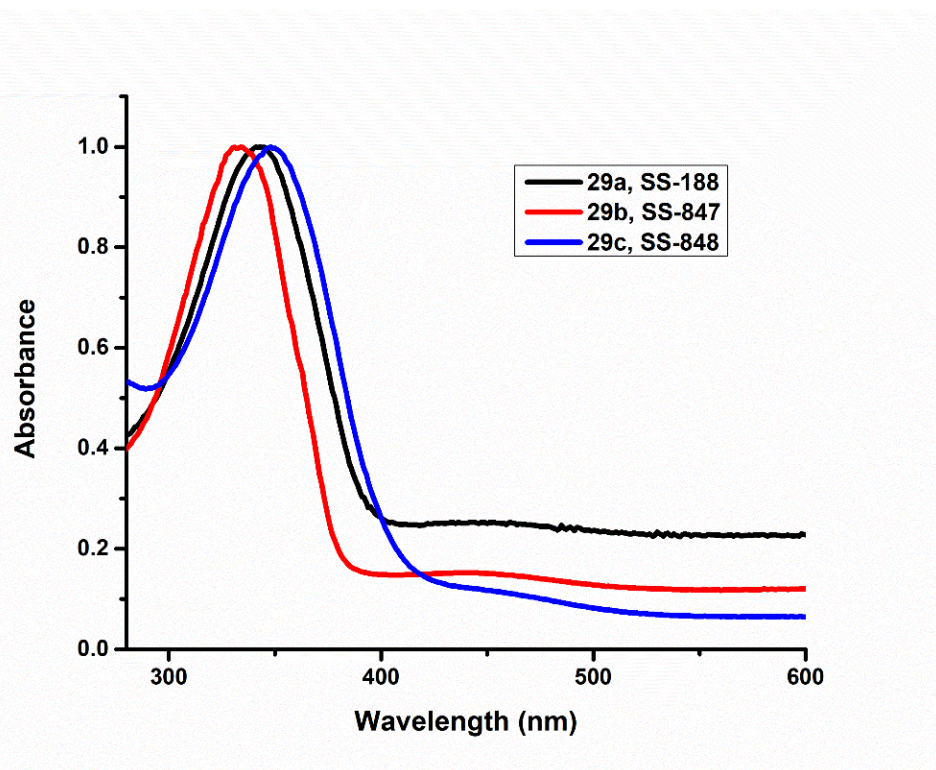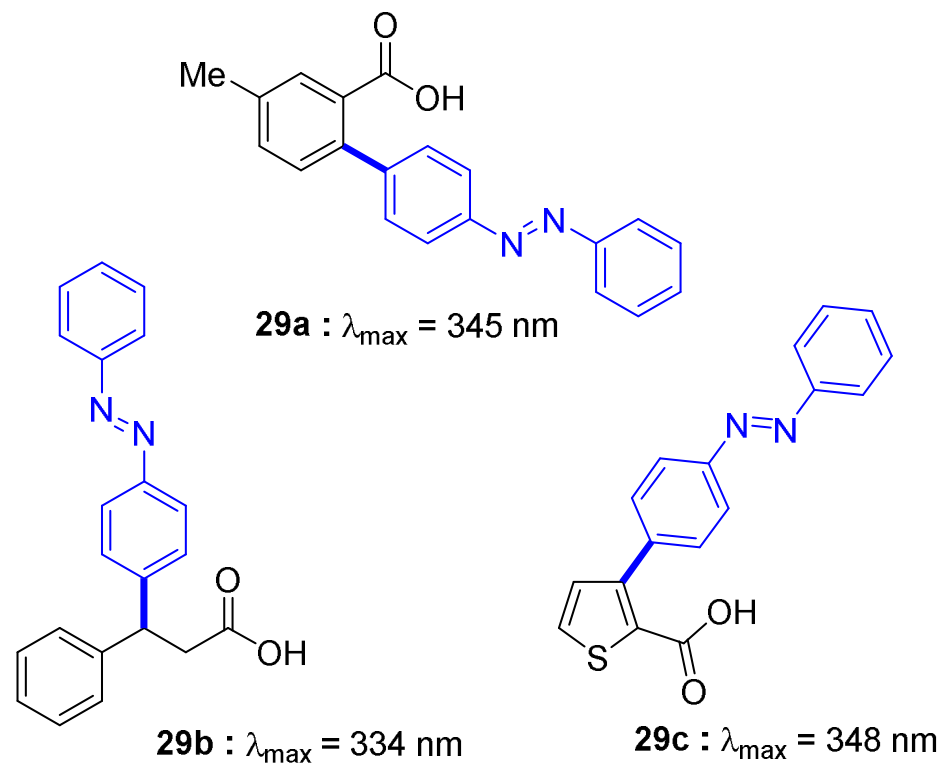

Photoswitching and kinetics experiments: UV-Vis spectroscopy

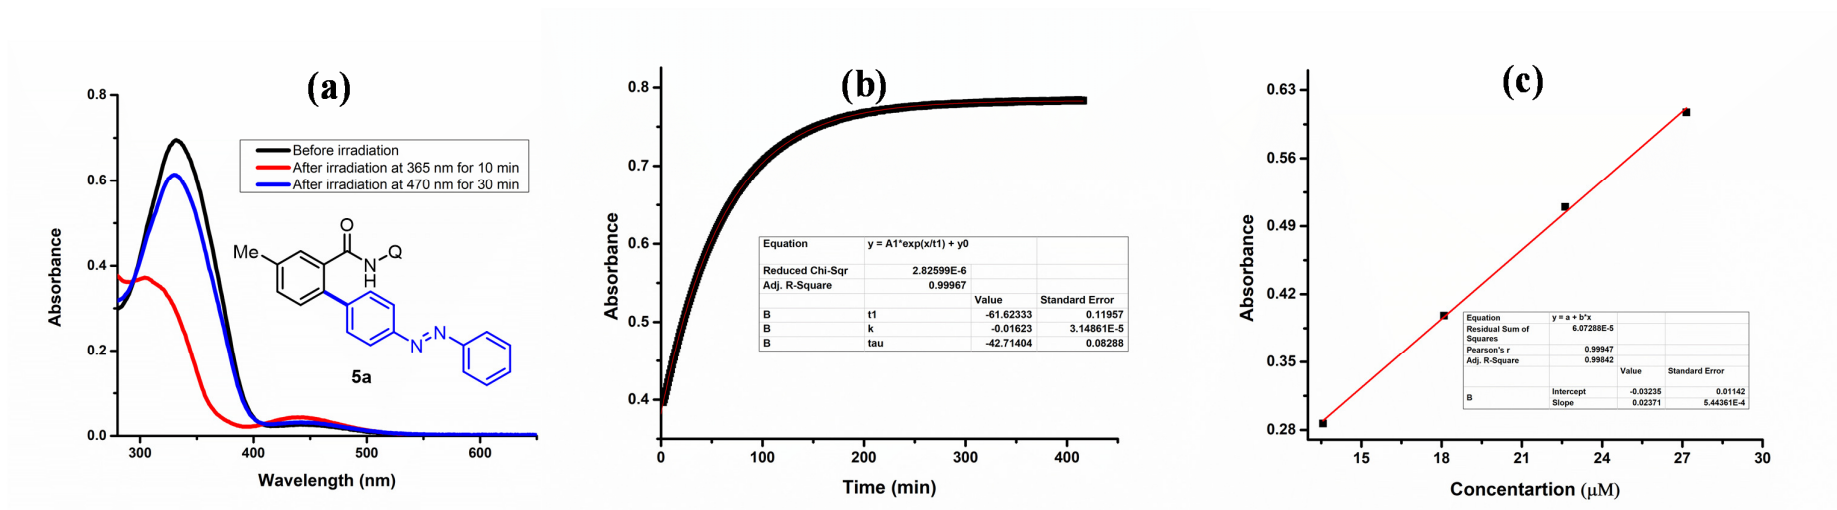

**Figure S1** (a) Photoswitching behavior (forward *E-Z* and reverse *Z-E* photoisomerization) of **5a** (DMSO, 6.8  $\mu\text{M}$ ) at the indicated wavelengths; (b) Thermal reverse *Z-E* isomerization kinetics profile and exponential fit for the first order rate of **5a** (DMSO, 6.8  $\mu\text{M}$ , 60  $^{\circ}\text{C}$ , monitored at  $\lambda = 331$  nm); (c) Estimation of the molar absorption coefficient of **5a** in DMSO at 331 nm.

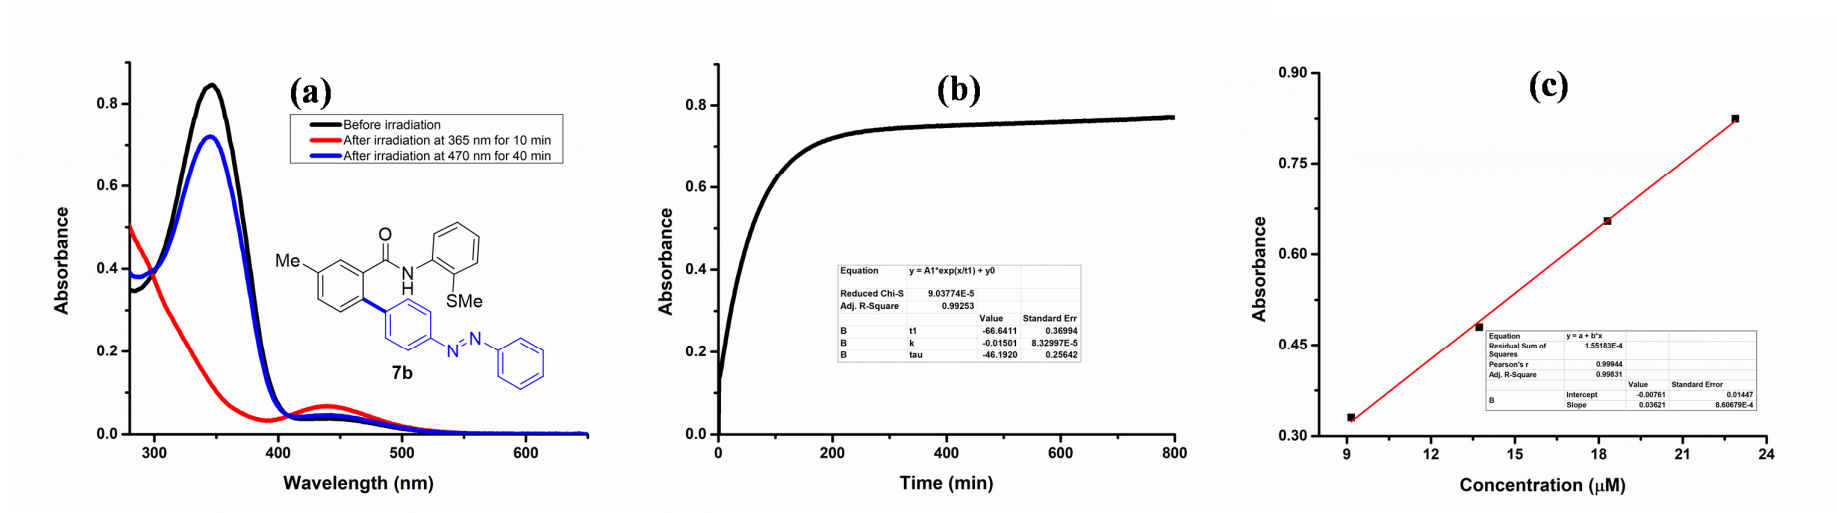

**Figure S2** (a) Photoswitching behavior (forward *E-Z* and reverse *Z-E* photoisomerization) of **7b** (DMSO, 18.3 μM) at the indicated wavelengths; (b) Thermal reverse *Z-E* isomerization kinetics profile and exponential fit for the first order rate of **7b** (DMSO, 18.3 μM, 60 °C, monitored at  $\lambda = 346$  nm); (c) Estimation of the molar absorption coefficient of **7b** in DMSO at 346 nm.

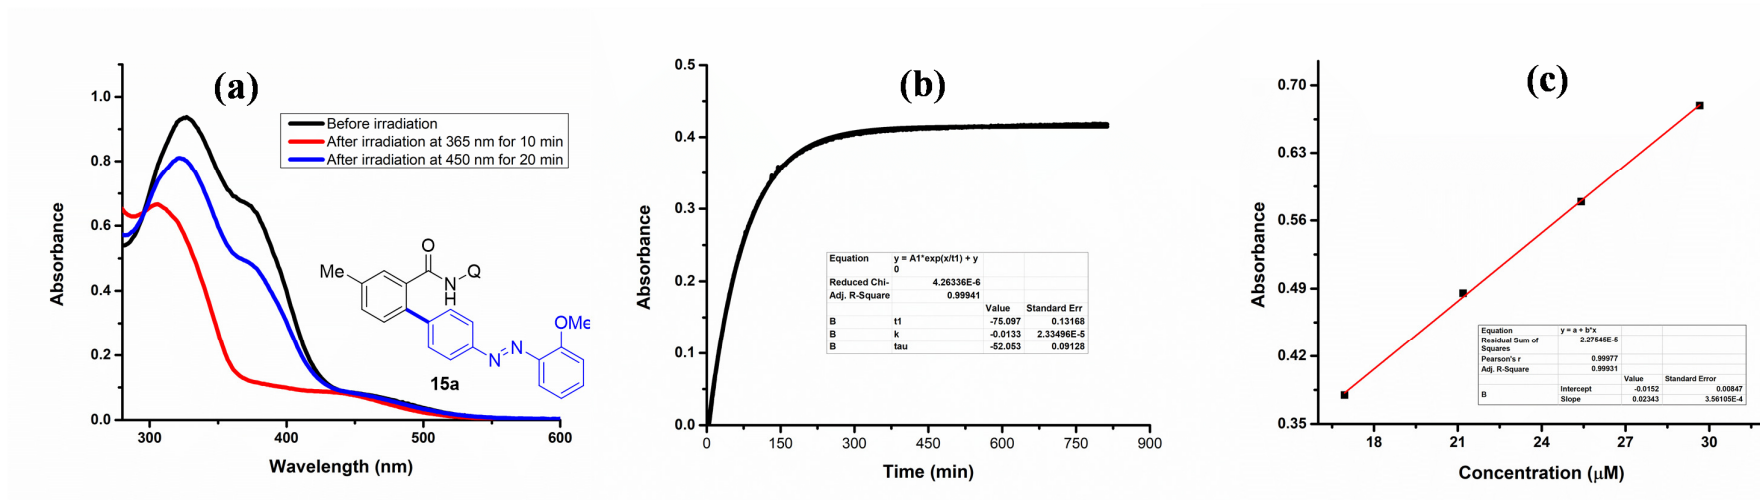

**Figure S3** (a) Photoswitching behavior (forward *E-Z* and reverse *Z-E* photoisomerization) of **15a** (DMSO, 33.9  $\mu\text{M}$ ) at the indicated wavelengths; (b) Thermal reverse *E-Z* isomerization kinetics profile and exponential fit for the first order rate of **15a** (DMSO, 33.9  $\mu\text{M}$ , 60  $^{\circ}\text{C}$ , monitored at  $\lambda = 327$  nm); (c) Estimation of the molar absorption coefficient of **15a** in DMSO at 327 nm.

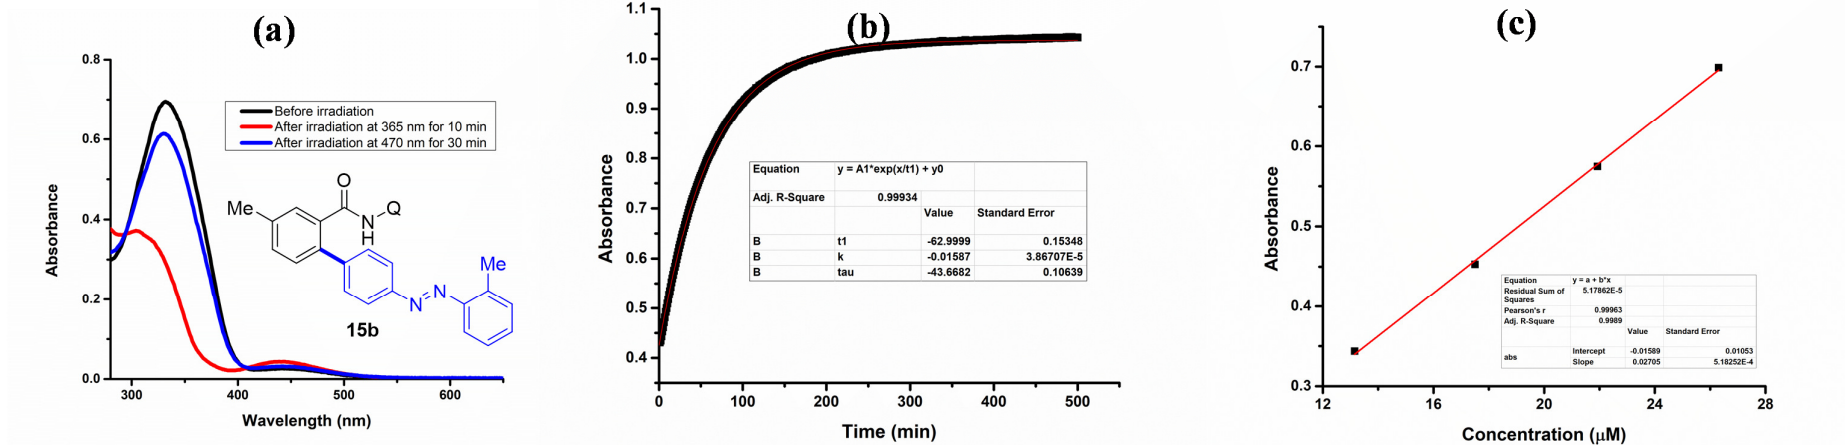

**Figure S4** (a) Photoswitching behavior (forward *E-Z* and reverse *Z-E* photoisomerization) of **15b** (DMSO, 21.9  $\mu\text{M}$ ) at the indicated wavelengths; (b) Thermal reverse *Z-E* isomerization kinetics profile and exponential fit for the first order rate of **15b** (DMSO, 21.9  $\mu\text{M}$ , 60  $^{\circ}\text{C}$ , monitored at  $\lambda = 338 \text{ nm}$ ); (c) Estimation of the molar absorption coefficient of **15b** in DMSO at 338 nm.



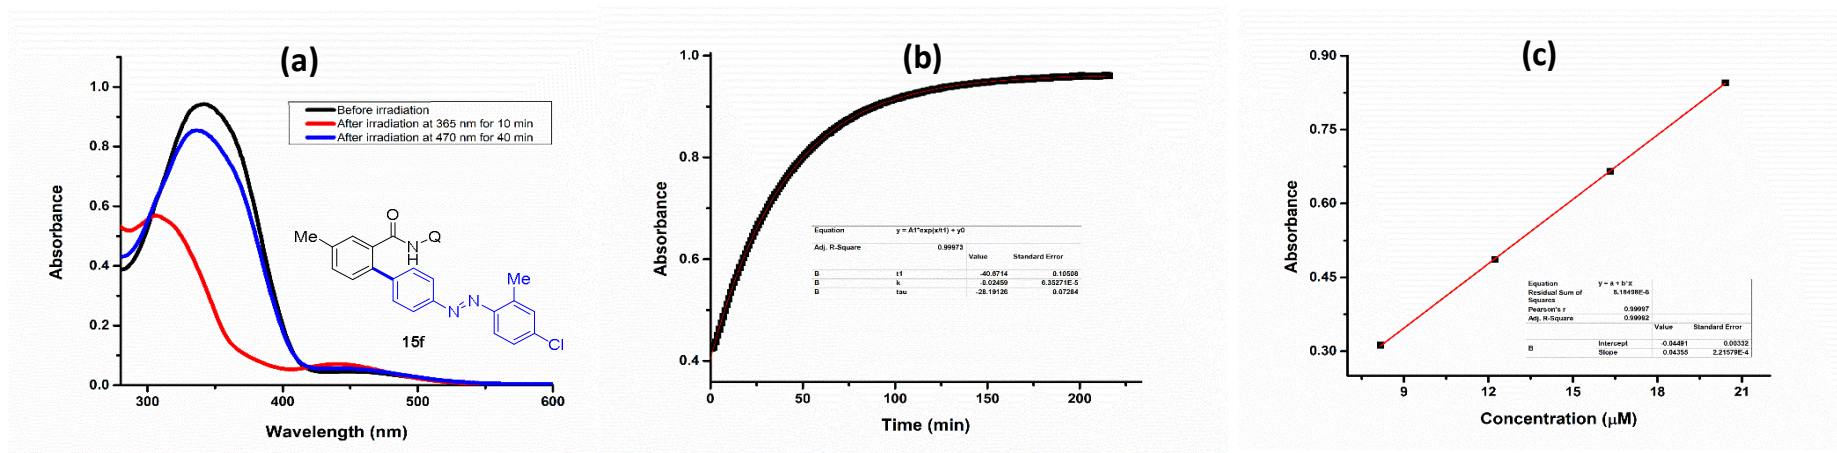

**Figure S5** (a) Photoswitching behavior (forward *E-Z* and reverse *Z-E* photoisomerization) of **15f** (DMSO, 24.5 μM) at the indicated wavelengths; (b) Thermal reverse *Z-E* isomerization kinetics profile and exponential fit for the first order rate of **15f** (DMSO, 24.5 μM, 60 °C, monitored at λ = 346 nm); (c) Estimation of the molar absorption coefficient of **15f** in DMSO at 346 nm.

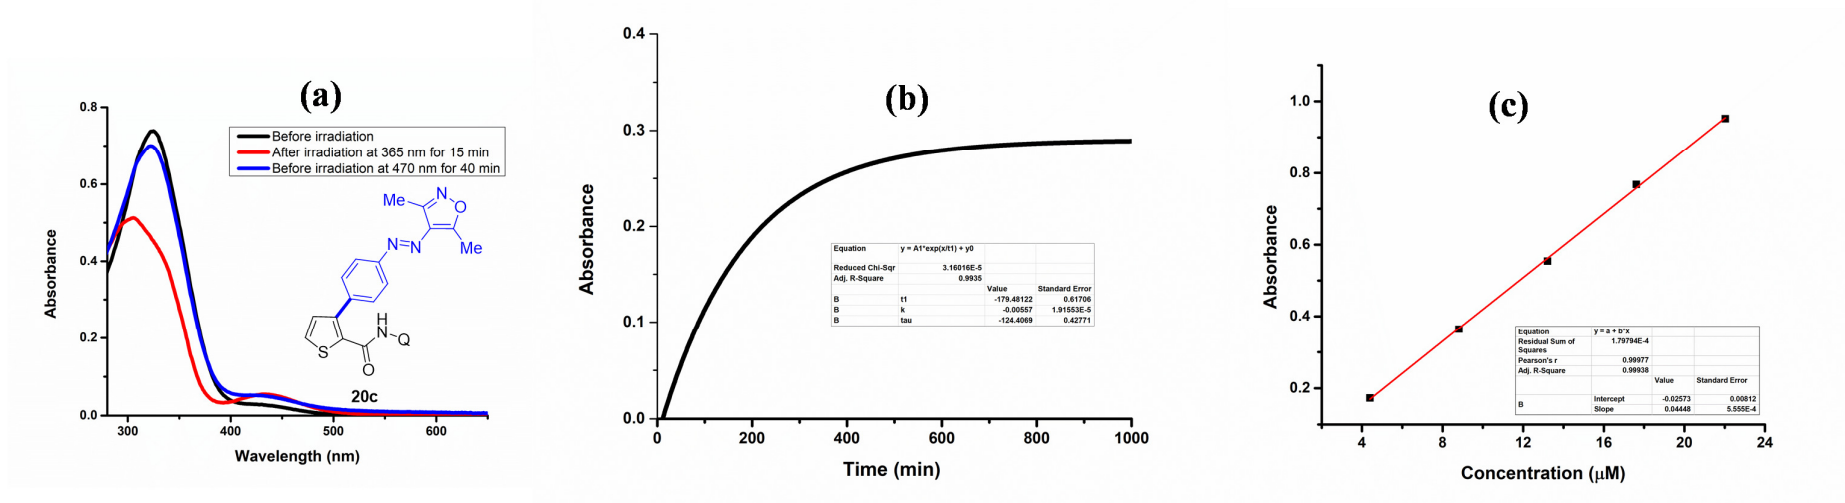

**Figure S6** (a) Photoswitching behavior (forward *E-Z* and reverse *Z-E* photoisomerization) of **20c** (DMSO, 15.4 µM) at the indicated wavelengths; (b) Thermal reverse *E-Z* isomerization kinetics profile and exponential fit for the first order rate of **20c** (DMSO, 15.4 µM, 60 °C, monitored at λ = 326 nm); (c) Estimation of the molar absorption coefficient of **20c** in DMSO at 326 nm.



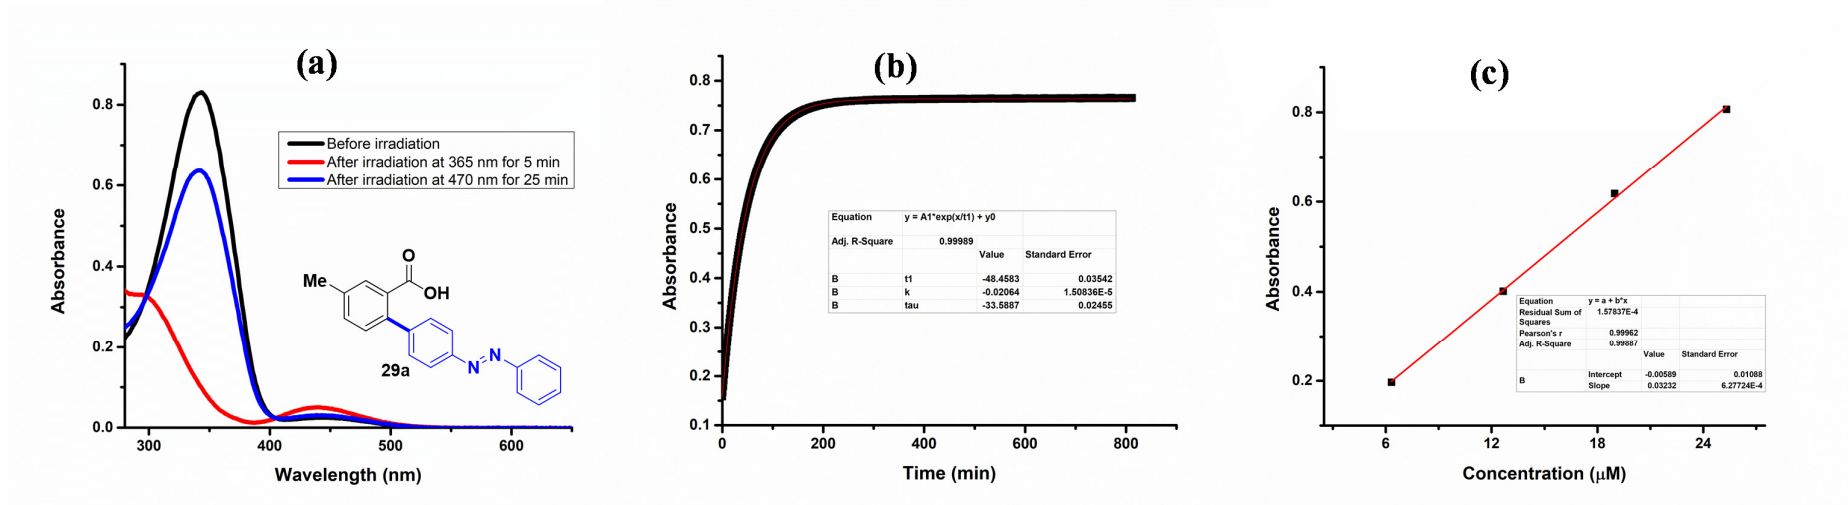

**Figure S7** (a) Photoswitching behavior (forward *E-Z* and reverse *Z-E* photoisomerization) of **29a** (DMSO, 12.6  $\mu\text{M}$ ) at the indicated wavelengths; (b) Thermal reverse *Z-E* isomerization kinetics profile and exponential fit for the first order rate of **29a** (DMSO, 12.6  $\mu\text{M}$ , 60  $^{\circ}\text{C}$ , monitored at  $\lambda = 345$  nm); (c) Estimation of the molar absorption coefficient of **29a** in DMSO at 345 nm.

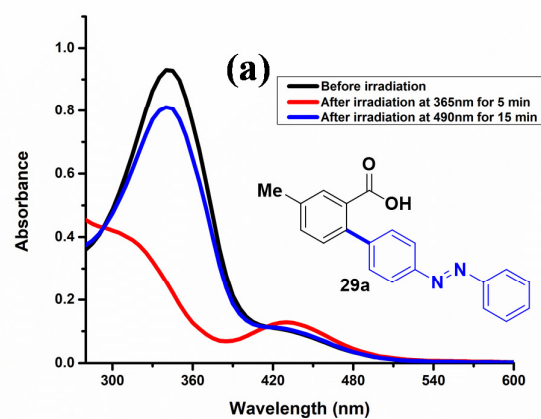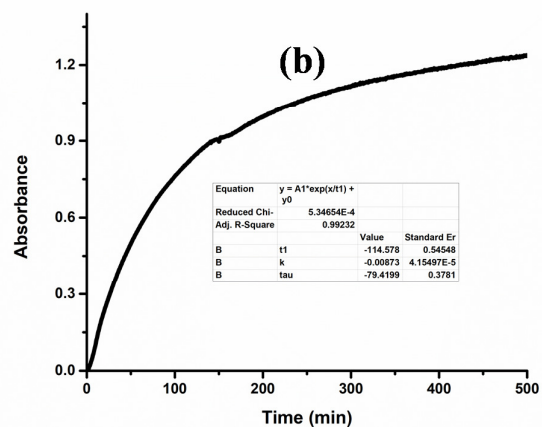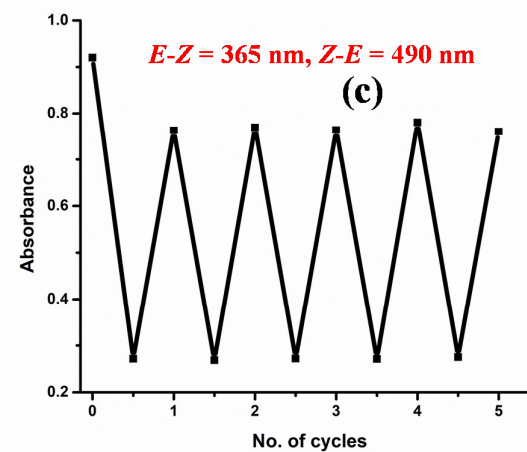

**Figure S8** (a) Photoswitching behavior (forward *E-Z* and reverse *Z-E* photoisomerization) of **29a** (water at pH=7.5, concentration undetermined) at the indicated wavelengths; (b) Thermal reverse *Z-E* isomerization kinetics profile and exponential fit for the first order rate of **29a** (water at pH=7.5, concentration undetermined, 60 °C, monitored at  $\lambda = 340$  nm); (c) Photoswitching stability over five cycles of **29a** by alternate irradiation for forward and reverse photoisomerization (Forward: 365 nm, reverse 490 nm) in water at pH=7.5.

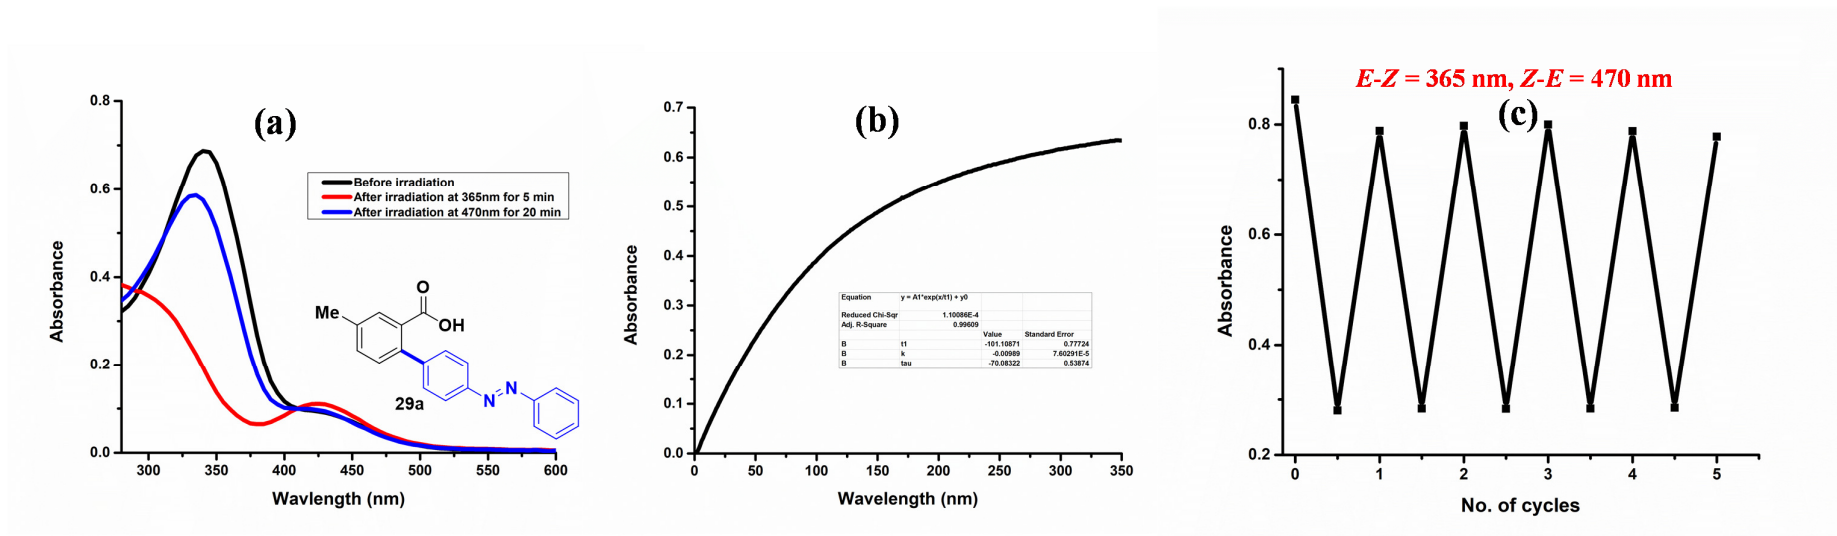

**Figure S9** (a) Photoswitching behavior (forward *E-Z* and reverse *Z-E* photoisomerization) of **29a** (water at pH=9.5, concentration undetermined) at the indicated wavelengths; (b) Thermal reverse *Z-E* isomerization kinetics profile and exponential fit for the first order rate of **29a** (water at pH=9.5, concentration undetermined, 60 °C, monitored at  $\lambda = 345$  nm); (c) Photoswitching stability over five cycles of **29a** by alternate irradiation for forward and reverse photoisomerization (Forward: 365 nm, reverse 470 nm) in water at pH=9.5.

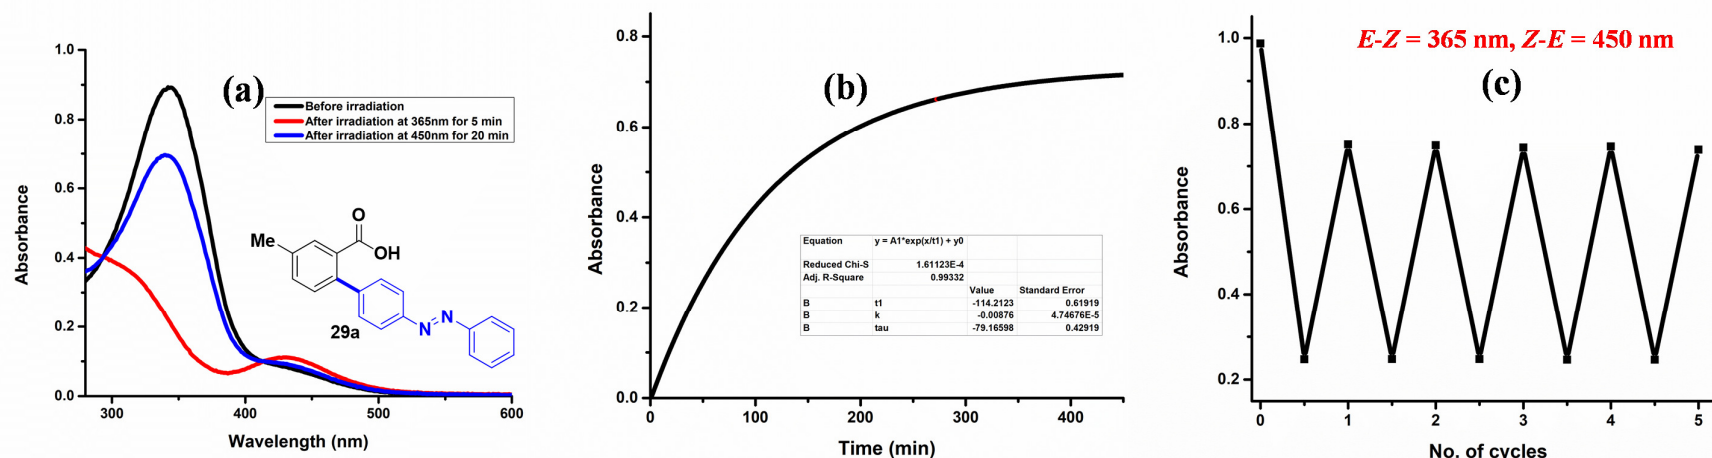

**Figure S10** (a) Photoswitching behavior (forward *E-Z* and reverse *Z-E* photoisomerization) of **29a** (water at pH=12.1, concentration undetermined) at the indicated wavelengths; (b) Thermal reverse *Z-E* isomerization kinetics profile and exponential fit for the first order rate of **29a** (water at pH=12.1, concentration undetermined, 60 °C, monitored at  $\lambda = 342$  nm); (c) Photoswitching stability over five cycles of **29a** by alternate irradiation for forward and reverse photoisomerization (Forward: 365 nm, reverse 450 nm) in water at pH=12.1.

The PSS composition of **29a** at different pH (7.5-12.1) has been estimated using the formula given below.

$$\% \text{ conversion of } E\text{-}Z \text{ isomers} = \left( 1 - \frac{A_{\pi-\pi^*} \text{ absorption after irradiation at } 365 \text{ nm}}{A_{\pi-\pi^*} \text{ absorption before irradiation}} \right) \times 100$$

$$\% \text{ conversion of } Z\text{-}E \text{ isomers} = \left( 1 - \frac{A_{\pi-\pi^*} \text{ absorption after irradiation at } 365 \text{ nm}}{A_{\pi-\pi^*} \text{ absorption after irradiation at } 450\text{--}490 \text{ nm}} \right) \times 100$$

| Sr. No. | Compound             | PSS composition in solution state    |                                      |
|---------|----------------------|--------------------------------------|--------------------------------------|
|         |                      | Forward isomerization ( <i>E-Z</i> ) | Reverse isomerization ( <i>Z-E</i> ) |
| 1.      | <b>29a</b> (pH=7.5)  | 72                                   | 55                                   |
| 2.      | <b>29a</b> (pH=9.5)  | 76                                   | 70                                   |
| 3.      | <b>29a</b> (pH=12.1) | 75                                   | 68                                   |
